# Supplementary material for: Solasonine Induces Apoptosis and Inhibits Proliferation of Bladder Cancer Cells by Suppressing NRP1 Expression
Source: PubMed Central journal article supplement (PMC8906937; doi:10.1155/2022/7261486), 2022-03-02
Supplement: 7261486.f1.pdf [file 7261486.f1.pdf]

## **Solasonine induces apoptosis and inhibits proliferation of bladder cancer cells by suppressing NRP1 expression**

Yang Dong, Lin Hao, Zhen-duo Shi, Kun Fang, Hui Yu, Guang-hui Zang, Tao Fan, Cong-hui Han

### ***Supplementary Materials***

|                                                                                         |               |
|-----------------------------------------------------------------------------------------|---------------|
| <b>Table S1:</b> Potential target genes of solasonine .....                             | Page: 2~11    |
| <b>Table S2:</b> Canonical pathway analysis by IPA for solasonine .....                 | Page:12~30    |
| <b>Table S3:</b> Disease and functional analysis by IPA for solasonine.....             | Page:31~92    |
| <b>Table S4:</b> Upstream analysis by IPA for solasonine.....                           | Page: 93~111  |
| <b>Table S5:</b> Causal regulatory network analysis by IPA for solasonine.....          | Page: 112~146 |
| <b>Table S6:</b> Toxicity analysis by IPA for solasonine.....                           | Page: 147~150 |
| <b>Table S7:</b> Potential therapeutic targets of solasonine for BC.....                | Page: 151~156 |
| <b>Table S8:</b> KEGG pathway and GO analyses for genes of solasonine targeting BC..... | Page:157~207  |
| <b>Table S9:</b> Binding free energy of NRP1 docking with solasonine.....               | Page: 208~212 |

**Supplementary Table S1: Potential target genes of solasonine.** There were 286 potential targets identified from PharmMapper (Norm fit > 0.3), 5 targets from TargetNet server, and 16 human target proteins from SEA database. After removal of three overlapped genes, a total of 304 unique target genes were obtained in the merged union.

### PharmMapper Database

| Num | Database    | Symbol  | Norm Fit | Name                                                           |
|-----|-------------|---------|----------|----------------------------------------------------------------|
| 1   | PharmMapper | CSDE1   | 0.830    | Cold shock domain-containing protein E1                        |
| 2   | PharmMapper | RGS6    | 0.816    | Regulator of G-protein signaling 6                             |
| 3   | PharmMapper | APPL1   | 0.797    | DCC-interacting protein 13-alpha                               |
| 4   | PharmMapper | POT1    | 0.783    | Protection of telomeres protein 1                              |
| 5   | PharmMapper | F2      | 0.783    | Prothrombin                                                    |
| 6   | PharmMapper | RARG    | 0.778    | Retinoic acid receptor gamma                                   |
| 7   | PharmMapper | NF2     | 0.718    | Merlin                                                         |
| 8   | PharmMapper | CUL1    | 0.715    | Cullin-1                                                       |
| 9   | PharmMapper | HK2     | 0.675    | Hexokinase-2                                                   |
| 10  | PharmMapper | EP300   | 0.668    | Histone acetyltransferase p300                                 |
| 11  | PharmMapper | USP19   | 0.666    | Ubiquitin carboxyl-terminal hydrolase 19                       |
| 12  | PharmMapper | SH3YL1  | 0.663    | SH3 domain-containing YSC84-like protein 1                     |
| 13  | PharmMapper | ACBD7   | 0.660    | Acyl-CoA-binding domain-containing protein 7                   |
| 14  | PharmMapper | CAMK4   | 0.643    | Calcium/calmodulin-dependent protein kinase type IV            |
| 15  | PharmMapper | INADL   | 0.643    | InaD-like protein                                              |
| 16  | PharmMapper | RRM1    | 0.635    | Ribonucleoside-diphosphate reductase large subunit             |
| 17  | PharmMapper | XRCC6   | 0.632    | ATP-dependent DNA helicase 2 subunit 1                         |
| 18  | PharmMapper | HSD17B4 | 0.631    | Peroxisomal multifunctional enzyme type 2                      |
| 19  | PharmMapper | PIP4K2C | 0.629    | Phosphatidylinositol-5-phosphate 4-kinase type-2 gamma         |
| 20  | PharmMapper | MMP2    | 0.625    | 72 kDa type IV collagenase                                     |
| 21  | PharmMapper | IQUB    | 0.622    | IQ and ubiquitin-like domain-containing protein                |
| 22  | PharmMapper | HIBCH   | 0.612    | 3-hydroxyisobutyryl-CoA hydrolase, mitochondrial               |
| 23  | PharmMapper | ARHGAP5 | 0.605    | Rho GTPase-activating protein 5                                |
| 24  | PharmMapper | ACADVL  | 0.591    | Very long-chain specific acyl-CoA dehydrogenase, mitochondrial |
| 25  | PharmMapper | PTPRE   | 0.585    | Receptor-type tyrosine-protein phosphatase epsilon             |
| 26  | PharmMapper | HBEGF   | 0.580    | Proheparin-binding EGF-like growth factor                      |

|    |             |        |       |                                                                      |
|----|-------------|--------|-------|----------------------------------------------------------------------|
| 27 | PharmMapper | HMGCS1 | 0.575 | Hydroxymethylglutaryl-CoA synthase, cytoplasmic                      |
| 28 | PharmMapper | AR     | 0.573 | Androgen receptor                                                    |
| 29 | PharmMapper | HMOX1  | 0.571 | Heme oxygenase 1                                                     |
| 30 | PharmMapper | VAV3   | 0.569 | Guanine nucleotide exchange factor VAV3                              |
| 31 | PharmMapper | DMC1   | 0.568 | Meiotic recombination protein DMC1/LIM15 homolog                     |
| 32 | PharmMapper | ZEB2   | 0.560 | Zinc finger E-box-binding homeobox 2                                 |
| 33 | PharmMapper | YARS   | 0.556 | Tyrosyl-tRNA synthetase, cytoplasmic                                 |
| 34 | PharmMapper | ZBTB43 | 0.555 | Zinc finger and BTB domain-containing protein 43                     |
| 35 | PharmMapper | NME3   | 0.555 | Nucleoside diphosphate kinase 3                                      |
| 36 | PharmMapper | GALM   | 0.553 | Aldose 1-epimerase                                                   |
| 37 | PharmMapper | NR1I3  | 0.552 | Nuclear receptor subfamily 1 group I member 3                        |
| 38 | PharmMapper | BTK    | 0.552 | Tyrosine-protein kinase BTK                                          |
| 39 | PharmMapper | MUC1   | 0.552 | Mucin-1                                                              |
| 40 | PharmMapper | IMPDH1 | 0.550 | Inosine-5-monophosphate dehydrogenase 1                              |
| 41 | PharmMapper | MARK1  | 0.548 | Serine/threonine-protein kinase MARK1                                |
| 42 | PharmMapper | DOK2   | 0.547 | Docking protein 2                                                    |
| 43 | PharmMapper | SUB1   | 0.543 | Activated RNA polymerase II transcriptional coactivator p15          |
| 44 | PharmMapper | ACAT2  | 0.543 | Acetyl-CoA acetyltransferase, cytosolic                              |
| 45 | PharmMapper | VEGFB  | 0.542 | Vascular endothelial growth factor B                                 |
| 46 | PharmMapper | FABP3  | 0.541 | Fatty acid-binding protein, heart                                    |
| 47 | PharmMapper | KLK1   | 0.538 | Kallikrein-1                                                         |
| 48 | PharmMapper | RND1   | 0.538 | Rho-related GTP-binding protein Rho6                                 |
| 49 | PharmMapper | TIMM9  | 0.536 | Mitochondrial import inner membrane translocase subunit Tim9         |
| 50 | PharmMapper | HBB    | 0.532 | Hemoglobin subunit beta                                              |
| 51 | PharmMapper | MAP3K3 | 0.531 | Mitogen-activated protein kinase kinase kinase 3                     |
| 52 | PharmMapper | CDK5R1 | 0.530 | Cyclin-dependent kinase 5 activator 1                                |
| 53 | PharmMapper | ITPKC  | 0.523 | Inositol-trisphosphate 3-kinase C                                    |
| 54 | PharmMapper | DFFA   | 0.520 | DNA fragmentation factor subunit alpha                               |
| 55 | PharmMapper | PDK3   | 0.509 | [Pyruvate dehydrogenase [lipoamide]] kinase isozyme 3, mitochondrial |
| 56 | PharmMapper | ACADSB | 0.508 | Short/branched chain specific acyl-CoA dehydrogenase, mitochondrial  |
| 57 | PharmMapper | RBP5   | 0.506 | Retinol-binding protein 5                                            |
| 58 | PharmMapper | ZNF462 | 0.502 | Zinc finger protein 462                                              |

|    |             |          |       |                                                                                   |
|----|-------------|----------|-------|-----------------------------------------------------------------------------------|
| 59 | PharmMapper | NMRK1    | 0.500 | Nicotinamide riboside kinase 1                                                    |
| 60 | PharmMapper | ESR1     | 0.500 | Estrogen receptor                                                                 |
| 61 | PharmMapper | HSCB     | 0.496 | Co-chaperone protein HscB, mitochondrial                                          |
| 62 | PharmMapper | PUS10    | 0.495 | Putative tRNA pseudouridine synthase Pus10                                        |
| 63 | PharmMapper | RAC1     | 0.495 | Ras-related C3 botulinum toxin substrate 1                                        |
| 64 | PharmMapper | PTPRF    | 0.494 | Receptor-type tyrosine-protein phosphatase F                                      |
| 65 | PharmMapper | SH2B2    | 0.490 | SH2B adapter protein 2                                                            |
| 66 | PharmMapper | HCK      | 0.490 | Tyrosine-protein kinase HCK                                                       |
| 67 | PharmMapper | CIAO1    | 0.490 | Probable cytosolic iron-sulfur protein assembly protein CIAO1                     |
| 68 | PharmMapper | FCGR2A   | 0.489 | Low affinity immunoglobulin gamma Fc region receptor II-a                         |
| 69 | PharmMapper | EPHA3    | 0.489 | Ephrin type-A receptor 3                                                          |
| 70 | PharmMapper | PTK2B    | 0.487 | Protein tyrosine kinase 2 beta                                                    |
| 71 | PharmMapper | TRIM21   | 0.485 | 52 kDa Ro protein                                                                 |
| 72 | PharmMapper | NDUFAB1  | 0.484 | Acyl carrier protein, mitochondrial                                               |
| 73 | PharmMapper | AMY1B    | 0.484 | Alpha-amylase 1                                                                   |
| 74 | PharmMapper | CRYM     | 0.484 | Mu-crystallin homolog                                                             |
| 75 | PharmMapper | DTYMK    | 0.482 | Thymidylate kinase                                                                |
| 76 | PharmMapper | PPP2R1A  | 0.482 | Serine/threonine-protein phosphatase 2A 65 kDa regulatory subunit A alpha isoform |
| 77 | PharmMapper | MTAP     | 0.481 | S-methyl-5-thioadenosine phosphorylase                                            |
| 78 | PharmMapper | KMT5A    | 0.481 | Histone-lysine N-methyltransferase SETD8                                          |
| 79 | PharmMapper | LARS     | 0.481 | Leucyl-tRNA synthetase, cytoplasmic                                               |
| 80 | PharmMapper | IGF1R    | 0.479 | Insulin-like growth factor 1 receptor                                             |
| 81 | PharmMapper | FLNB     | 0.479 | Filamin-B                                                                         |
| 82 | PharmMapper | HDAC7    | 0.479 | Histone deacetylase 7                                                             |
| 83 | PharmMapper | ALOX12   | 0.474 | Arachidonate 12-lipoxygenase, 12S-type                                            |
| 84 | PharmMapper | ZFP28    | 0.474 | Zinc finger protein 28 homolog                                                    |
| 85 | PharmMapper | WWP1     | 0.474 | NEDD4-like E3 ubiquitin-protein ligase WWP1                                       |
| 86 | PharmMapper | HSP90AB1 | 0.472 | Heat shock protein HSP 90-beta                                                    |
| 87 | PharmMapper | KIF11    | 0.472 | Kinesin-like protein KIF11                                                        |
| 88 | PharmMapper | GC       | 0.471 | Vitamin D-binding protein                                                         |
| 89 | PharmMapper | MATK     | 0.468 | Megakaryocyte-associated tyrosine-protein kinase                                  |
| 90 | PharmMapper | DCXR     | 0.464 | L-xylulose reductase                                                              |

|     |             |         |       |                                                                        |
|-----|-------------|---------|-------|------------------------------------------------------------------------|
| 91  | PharmMapper | ACPP    | 0.463 | Prostatic acid phosphatase                                             |
| 92  | PharmMapper | GTF2F2  | 0.461 | General transcription factor IIF subunit 2                             |
| 93  | PharmMapper | ITSN1   | 0.459 | Intersectin-1                                                          |
| 94  | PharmMapper | F3      | 0.458 | Tissue factor                                                          |
| 95  | PharmMapper | ACVR2B  | 0.458 | Activin receptor type-2B                                               |
| 96  | PharmMapper | SNX22   | 0.457 | Sorting nexin-22                                                       |
| 97  | PharmMapper | CLK1    | 0.456 | Dual specificity protein kinase CLK1                                   |
| 98  | PharmMapper | SENP2   | 0.456 | Sentrin-specific protease 2                                            |
| 99  | PharmMapper | CSF2RB  | 0.456 | Cytokine receptor common subunit beta                                  |
| 100 | PharmMapper | MSN     | 0.455 | Moesin                                                                 |
| 101 | PharmMapper | MEMO1   | 0.454 | Protein MEMO1                                                          |
| 102 | PharmMapper | KYNU    | 0.453 | Kynureninase                                                           |
| 103 | PharmMapper | SF3B6   | 0.452 | Pre-mRNA branch site protein p14                                       |
| 104 | PharmMapper | GSTT2B  | 0.451 | Glutathione S-transferase theta-2                                      |
| 105 | PharmMapper | RAB26   | 0.451 | Ras-related protein Rab-26                                             |
| 106 | PharmMapper | MAPK6   | 0.450 | Mitogen-activated protein kinase 6                                     |
| 107 | PharmMapper | BMP1    | 0.450 | Bone morphogenetic protein 1                                           |
| 108 | PharmMapper | PAPSS1  | 0.449 | Bifunctional 3-phosphoadenosine 5-phosphosulfate synthetase 1          |
| 109 | PharmMapper | PYGL    | 0.446 | Glycogen phosphorylase, liver form                                     |
| 110 | PharmMapper | MSH2    | 0.446 | DNA mismatch repair protein Msh2                                       |
| 111 | PharmMapper | POU2F1  | 0.446 | POU domain, class 2, transcription factor 1                            |
| 112 | PharmMapper | GTF2I   | 0.446 | General transcription factor II-I                                      |
| 113 | PharmMapper | SKP1    | 0.444 | S-phase kinase-associated protein 1                                    |
| 114 | PharmMapper | PC      | 0.444 | Pyruvate carboxylase, mitochondrial                                    |
| 115 | PharmMapper | ZCWPW1  | 0.443 | Zinc finger CW-type PWWP domain protein 1                              |
| 116 | PharmMapper | DHPS    | 0.443 | Deoxyhypusine synthase                                                 |
| 117 | PharmMapper | ACSM2A  | 0.443 | Acyl-coenzyme A synthetase ACSM2A, mitochondrial                       |
| 118 | PharmMapper | ASAP1   | 0.443 | Arf-GAP with SH3 domain, ANK repeat and PH domain-containing protein 1 |
| 119 | PharmMapper | NCOA3   | 0.443 | Nuclear receptor coactivator 3                                         |
| 120 | PharmMapper | TTR     | 0.442 | Transthyretin                                                          |
| 121 | PharmMapper | CSNK1G2 | 0.442 | Casein kinase I isoform gamma-2                                        |
| 122 | PharmMapper | PDK2    | 0.441 | [Pyruvate dehydrogenase [lipoamide]] kinase isozyme 2, mitochondrial   |

|     |             |          |       |                                                                           |
|-----|-------------|----------|-------|---------------------------------------------------------------------------|
| 123 | PharmMapper | ADH1C    | 0.437 | Alcohol dehydrogenase 1C                                                  |
| 124 | PharmMapper | ITPK1    | 0.437 | Inositol-tetrakisphosphate 1-kinase                                       |
| 125 | PharmMapper | BPI      | 0.436 | Bactericidal permeability-increasing protein                              |
| 126 | PharmMapper | HAT1     | 0.436 | Histone acetyltransferase type B catalytic subunit                        |
| 127 | PharmMapper | HPD      | 0.436 | 4-hydroxyphenylpyruvate dioxygenase                                       |
| 128 | PharmMapper | PAH      | 0.435 | Phenylalanine-4-hydroxylase                                               |
| 129 | PharmMapper | B2M      | 0.434 | Beta-2-microglobulin                                                      |
| 130 | PharmMapper | SULT1A1  | 0.433 | Sulfotransferase 1A1                                                      |
| 131 | PharmMapper | NT5C3A   | 0.431 | Cytosolic 5-nucleotidase 3                                                |
| 132 | PharmMapper | PDF      | 0.431 | Peptide deformylase, mitochondrial                                        |
| 133 | PharmMapper | HDX      | 0.430 | Highly divergent homeobox                                                 |
| 134 | PharmMapper | MYSM1    | 0.429 | Histone H2A deubiquitinase MYSM1                                          |
| 135 | PharmMapper | NUP214   | 0.427 | Nuclear pore complex protein Nup214                                       |
| 136 | PharmMapper | PANK1    | 0.426 | Pantothenate kinase 1                                                     |
| 137 | PharmMapper | MAGEA4   | 0.426 | Melanoma-associated antigen 4                                             |
| 138 | PharmMapper | NSUN5    | 0.426 | Putative methyltransferase NSUN5                                          |
| 139 | PharmMapper | LRBA     | 0.425 | Lipopolysaccharide-responsive and beige-like anchor protein               |
| 140 | PharmMapper | SART3    | 0.425 | Squamous cell carcinoma antigen recognized by T-cells 3                   |
| 141 | PharmMapper | TXNDC12  | 0.424 | Thioredoxin domain-containing protein 12                                  |
| 142 | PharmMapper | FABP7    | 0.424 | Fatty acid-binding protein, brain                                         |
| 143 | PharmMapper | BCR      | 0.423 | Breakpoint cluster region protein                                         |
| 144 | PharmMapper | CYP2R1   | 0.422 | Vitamin D 25-hydroxylase                                                  |
| 145 | PharmMapper | PSAP     | 0.422 | Proactivator polypeptide                                                  |
| 146 | PharmMapper | YWHAQ    | 0.422 | 14-3-3 protein theta                                                      |
| 147 | PharmMapper | SMG5     | 0.421 | Protein SMG5                                                              |
| 148 | PharmMapper | SMG7     | 0.419 | Protein SMG7                                                              |
| 149 | PharmMapper | WEE1     | 0.418 | Wee1-like protein kinase                                                  |
| 150 | PharmMapper | AASDHPPT | 0.418 | L-aminoadipate-semialdehyde dehydrogenase-phosphopantetheinyl transferase |
| 151 | PharmMapper | TLR4     | 0.418 | Toll-like receptor 4                                                      |
| 152 | PharmMapper | CYP7A1   | 0.416 | Cytochrome P450 7A1                                                       |
| 153 | PharmMapper | IFNGR1   | 0.416 | Interferon-gamma receptor alpha chain                                     |
| 154 | PharmMapper | FAS      | 0.416 | Tumor necrosis factor receptor superfamily member 6                       |

|     |             |           |       |                                                                              |
|-----|-------------|-----------|-------|------------------------------------------------------------------------------|
| 155 | PharmMapper | PEX5      | 0.413 | Peroxisomal targeting signal 1 receptor                                      |
| 156 | PharmMapper | PA2G4     | 0.412 | Proliferation-associated protein 2G4                                         |
| 157 | PharmMapper | EXOSC9    | 0.411 | Exosome complex exonuclease RRP45                                            |
| 158 | PharmMapper | RBBP6     | 0.410 | Retinoblastoma-binding protein 6                                             |
| 159 | PharmMapper | PHF24     | 0.410 | Protein KIAA1045                                                             |
| 160 | PharmMapper | ACACB     | 0.410 | Acetyl-CoA carboxylase 2                                                     |
| 161 | PharmMapper | ATXN3     | 0.410 | Ataxin-3                                                                     |
| 162 | PharmMapper | HNRNPA2B1 | 0.409 | Heterogeneous nuclear ribonucleoproteins A2/B1                               |
| 163 | PharmMapper | ERBB4     | 0.406 | Receptor tyrosine-protein kinase erbB-4                                      |
| 164 | PharmMapper | ITGB3     | 0.405 | Integrin beta-3                                                              |
| 165 | PharmMapper | SMAP1     | 0.404 | Stromal membrane-associated protein 1                                        |
| 166 | PharmMapper | ADRBK1    | 0.402 | Beta-adrenergic receptor kinase 1                                            |
| 167 | PharmMapper | MYBPC3    | 0.401 | Myosin-binding protein C, cardiac-type                                       |
| 168 | PharmMapper | GAD2      | 0.399 | Glutamate decarboxylase 2                                                    |
| 169 | PharmMapper | PCYT2     | 0.398 | Ethanolamine-phosphate cytidyltransferase                                    |
| 170 | PharmMapper | FAP       | 0.397 | Seprase                                                                      |
| 171 | PharmMapper | SEC23A    | 0.396 | Protein transport protein Sec23A                                             |
| 172 | PharmMapper | PARN      | 0.395 | Poly(A)-specific ribonuclease PARN                                           |
| 173 | PharmMapper | SMURF2    | 0.395 | E3 ubiquitin-protein ligase SMURF2                                           |
| 174 | PharmMapper | ADH7      | 0.395 | Alcohol dehydrogenase class 4 mu/sigma chain                                 |
| 175 | PharmMapper | RPA3      | 0.394 | Replication protein A 14 kDa subunit                                         |
| 176 | PharmMapper | ANXA6     | 0.393 | Annexin A6                                                                   |
| 177 | PharmMapper | MAGI2     | 0.392 | Membrane-associated guanylate kinase, WW and PDZ domain-containing protein 2 |
| 178 | PharmMapper | HLA-DRB1  | 0.391 | HLA class II histocompatibility antigen, DRB1-1 beta chain                   |
| 179 | PharmMapper | CD1A      | 0.390 | T-cell surface glycoprotein CD1a                                             |
| 180 | PharmMapper | NFATC1    | 0.390 | Nuclear factor of activated T-cells, cytoplasmic 1                           |
| 181 | PharmMapper | ALK       | 0.390 | ALK tyrosine kinase receptor                                                 |
| 182 | PharmMapper | MDH1      | 0.389 | Malate dehydrogenase, cytoplasmic                                            |
| 183 | PharmMapper | CYP2E1    | 0.389 | Cytochrome P450 2E1                                                          |
| 184 | PharmMapper | B3GAT2    | 0.388 | Galactosylgalactosylxylosylprotein 3-beta-glucuronosyltransferase 2          |
| 185 | PharmMapper | PPARG     | 0.387 | Peroxisome proliferator-activated receptor gamma                             |
| 186 | PharmMapper | DGKA      | 0.387 | Diacylglycerol kinase alpha                                                  |

|     |             |          |       |                                                  |
|-----|-------------|----------|-------|--------------------------------------------------|
| 187 | PharmMapper | ATP7B    | 0.386 | Copper-transporting ATPase 2                     |
| 188 | PharmMapper | PGK1     | 0.386 | Phosphoglycerate kinase 1                        |
| 189 | PharmMapper | MMP1     | 0.385 | Interstitial collagenase                         |
| 190 | PharmMapper | COL4A3BP | 0.384 | Collagen type IV alpha-3-binding protein         |
| 191 | PharmMapper | DAPK2    | 0.383 | Death-associated protein kinase 2                |
| 192 | PharmMapper | SHFM1    | 0.383 | 26S proteasome complex subunit DSS1              |
| 193 | PharmMapper | S100A6   | 0.383 | Protein S100-A6                                  |
| 194 | PharmMapper | CSNK1G1  | 0.383 | Casein kinase I isoform gamma-1                  |
| 195 | PharmMapper | NOTCH1   | 0.382 | Neurogenic locus notch homolog protein 1         |
| 196 | PharmMapper | SERPINA5 | 0.382 | Plasma serine protease inhibitor                 |
| 197 | PharmMapper | GALNT10  | 0.382 | Polypeptide N-acetylgalactosaminyltransferase 10 |
| 198 | PharmMapper | NAE1     | 0.381 | NEDD8-activating enzyme E1 regulatory subunit    |
| 199 | PharmMapper | ZIC3     | 0.380 | Zinc finger protein ZIC 3                        |
| 200 | PharmMapper | MECR     | 0.380 | Trans-2-enoyl-CoA reductase, mitochondrial       |
| 201 | PharmMapper | IDE      | 0.379 | Insulin-degrading enzyme                         |
| 202 | PharmMapper | ODC1     | 0.379 | Ornithine decarboxylase                          |
| 203 | PharmMapper | RARA     | 0.378 | Retinoic acid receptor alpha                     |
| 204 | PharmMapper | PNMT     | 0.378 | Phenylethanolamine N-methyltransferase           |
| 205 | PharmMapper | HMBOX1   | 0.377 | Homeobox-containing protein 1                    |
| 206 | PharmMapper | TJP1     | 0.377 | Tight junction protein ZO-1                      |
| 207 | PharmMapper | AOC3     | 0.375 | Membrane primary amine oxidase                   |
| 208 | PharmMapper | CSTF2    | 0.374 | Cleavage stimulation factor 64 kDa subunit       |
| 209 | PharmMapper | YY1      | 0.374 | Transcriptional repressor protein YY1            |
| 210 | PharmMapper | CANT1    | 0.370 | Soluble calcium-activated nucleotidase 1         |
| 211 | PharmMapper | CA8      | 0.370 | Carbonic anhydrase-related protein               |
| 212 | PharmMapper | IFNG     | 0.370 | Interferon gamma                                 |
| 213 | PharmMapper | ANG      | 0.365 | Angiogenin                                       |
| 214 | PharmMapper | ACY1     | 0.365 | Aminoacylase-1                                   |
| 215 | PharmMapper | SNX1     | 0.362 | Sorting nexin-1                                  |
| 216 | PharmMapper | C8A      | 0.360 | Complement component C8 alpha chain              |
| 217 | PharmMapper | CTCF     | 0.360 | Transcriptional repressor CTCF                   |
| 218 | PharmMapper | TAF13    | 0.359 | Transcription initiation factor TFIID subunit 13 |



|     |             |           |       |                                                                     |
|-----|-------------|-----------|-------|---------------------------------------------------------------------|
| 219 | PharmMapper | GSG2      | 0.359 | Serine/threonine-protein kinase haspin                              |
| 220 | PharmMapper | GGPS1     | 0.358 | Geranylgeranyl pyrophosphate synthetase                             |
| 221 | PharmMapper | BTRC      | 0.357 | F-box/WD repeat-containing protein 1A                               |
| 222 | PharmMapper | TNFAIP8L2 | 0.356 | Tumor necrosis factor, alpha-induced protein 8-like protein 2       |
| 223 | PharmMapper | NBEA      | 0.355 | Neurobeachin                                                        |
| 224 | PharmMapper | MYBPC1    | 0.355 | Myosin-binding protein C, slow-type                                 |
| 225 | PharmMapper | STK4      | 0.355 | Serine/threonine-protein kinase 4                                   |
| 226 | PharmMapper | ECI2      | 0.355 | Peroxisomal 3,2-trans-enoyl-CoA isomerase                           |
| 227 | PharmMapper | EPS8L2    | 0.354 | Epidermal growth factor receptor kinase substrate 8-like protein 2  |
| 228 | PharmMapper | DPP4      | 0.351 | Dipeptidyl peptidase 4                                              |
| 229 | PharmMapper | ARHGEF1   | 0.349 | Rho guanine nucleotide exchange factor 1                            |
| 230 | PharmMapper | APEX1     | 0.349 | DNA-(apurinic or apyrimidinic site) lyase                           |
| 231 | PharmMapper | B3GAT3    | 0.348 | Galactosylgalactosylxylosylprotein 3-beta-glucuronosyltransferase 3 |
| 232 | PharmMapper | ARF6      | 0.347 | ADP-ribosylation factor 6                                           |
| 233 | PharmMapper | PGC       | 0.346 | Gastricsin                                                          |
| 234 | PharmMapper | XIAP      | 0.346 | Baculoviral IAP repeat-containing protein 4                         |
| 235 | PharmMapper | UEVLD     | 0.346 | Ubiquitin-conjugating enzyme E2 variant 3                           |
| 236 | PharmMapper | ECHS1     | 0.346 | Enoyl-CoA hydratase, mitochondrial                                  |
| 237 | PharmMapper | ALB       | 0.346 | Serum albumin                                                       |
| 238 | PharmMapper | PRKCB     | 0.345 | Protein kinase C beta type                                          |
| 239 | PharmMapper | FHIT      | 0.345 | Bis(5-adenosyl)-triphosphatase                                      |
| 240 | PharmMapper | GART      | 0.342 | Trifunctional purine biosynthetic protein adenosine-3               |
| 241 | PharmMapper | UTRN      | 0.342 | Utrophin                                                            |
| 242 | PharmMapper | PAFAH1B2  | 0.342 | Platelet-activating factor acetylhydrolase IB subunit beta          |
| 243 | PharmMapper | STK16     | 0.338 | Serine/threonine-protein kinase 16                                  |
| 244 | PharmMapper | DFNB31    | 0.338 | Whirlin                                                             |
| 245 | PharmMapper | IMPA2     | 0.337 | Inositol monophosphatase 2                                          |
| 246 | PharmMapper | C1R       | 0.335 | Complement C1r subcomponent                                         |
| 247 | PharmMapper | ITPA      | 0.334 | Inosine triphosphate pyrophosphatase                                |
| 248 | PharmMapper | YWHAH     | 0.331 | 14-3-3 protein eta                                                  |
| 249 | PharmMapper | SFMBT2    | 0.331 | Scm-like with four MBT domains protein 2                            |
| 250 | PharmMapper | OXSR1     | 0.329 | Serine/threonine-protein kinase OSR1                                |

|     |             |          |       |                                                                      |
|-----|-------------|----------|-------|----------------------------------------------------------------------|
| 251 | PharmMapper | RTN4IP1  | 0.329 | Reticulon-4-interacting protein 1, mitochondrial                     |
| 252 | PharmMapper | HMGB3    | 0.329 | High mobility group protein B3                                       |
| 253 | PharmMapper | OAT      | 0.328 | Ornithine aminotransferase, mitochondrial                            |
| 254 | PharmMapper | ERI1     | 0.328 | 3-5 exoribonuclease 1                                                |
| 255 | PharmMapper | SFN      | 0.328 | 14-3-3 protein sigma                                                 |
| 256 | PharmMapper | STARD13  | 0.328 | StAR-related lipid transfer protein 13                               |
| 257 | PharmMapper | G6PD     | 0.327 | Glucose-6-phosphate 1-dehydrogenase                                  |
| 258 | PharmMapper | DSG2     | 0.327 | Desmoglein-2                                                         |
| 259 | PharmMapper | THBS2    | 0.327 | Thrombospondin-2                                                     |
| 260 | PharmMapper | DCTD     | 0.327 | Deoxycytidylate deaminase                                            |
| 261 | PharmMapper | PDK4     | 0.325 | [Pyruvate dehydrogenase [lipoamide]] kinase isozyme 4, mitochondrial |
| 262 | PharmMapper | FN1      | 0.324 | Fibronectin                                                          |
| 263 | PharmMapper | CHKA     | 0.324 | Choline kinase alpha                                                 |
| 264 | PharmMapper | SMTN     | 0.323 | Smoothelin                                                           |
| 265 | PharmMapper | VPS26A   | 0.322 | Vacuolar protein sorting-associated protein 26A                      |
| 266 | PharmMapper | ZNF292   | 0.320 | Zinc finger protein 292                                              |
| 267 | PharmMapper | SEMA4D   | 0.320 | Semaphorin-4D                                                        |
| 268 | PharmMapper | CLCN5    | 0.319 | Chloride channel protein 5                                           |
| 269 | PharmMapper | GRHPR    | 0.318 | Glyoxylate reductase/hydroxypyruvate reductase                       |
| 270 | PharmMapper | NMT1     | 0.318 | Glycylpeptide N-tetradecanoyltransferase 1                           |
| 271 | PharmMapper | GRK6     | 0.318 | G protein-coupled receptor kinase 6                                  |
| 272 | PharmMapper | WARS     | 0.318 | Tryptophanyl-tRNA synthetase, cytoplasmic                            |
| 273 | PharmMapper | RUVBL1   | 0.318 | RuvB-like 1                                                          |
| 274 | PharmMapper | SLK      | 0.317 | STE20-like serine/threonine-protein kinase                           |
| 275 | PharmMapper | HSD17B10 | 0.316 | 3-hydroxyacyl-CoA dehydrogenase type-2                               |
| 276 | PharmMapper | NDC80    | 0.315 | Kinetochore protein NDC80 homolog                                    |
| 277 | PharmMapper | KIAA0430 | 0.315 | Limkain-b1                                                           |
| 278 | PharmMapper | PARP3    | 0.315 | Poly [ADP-ribose] polymerase 3                                       |
| 279 | PharmMapper | RBM39    | 0.315 | RNA-binding protein 39                                               |
| 280 | PharmMapper | SYT13    | 0.313 | Synaptotagmin-13                                                     |
| 281 | PharmMapper | ETF1     | 0.311 | Eukaryotic peptide chain release factor subunit 1                    |
| 282 | PharmMapper | SPEF1    | 0.307 | Sperm flagellar protein 1                                            |

|     |             |       |       |                                                                                |
|-----|-------------|-------|-------|--------------------------------------------------------------------------------|
| 283 | PharmMapper | HADH  | 0.306 | Hydroxyacyl-coenzyme A dehydrogenase, mitochondrial                            |
| 284 | PharmMapper | NCBP1 | 0.301 | Nuclear cap-binding protein subunit 1                                          |
| 285 | PharmMapper | PDHA1 | 0.301 | Pyruvate dehydrogenase E1 component subunit alpha, somatic form, mitochondrial |
| 286 | PharmMapper | CD74  | 0.300 | HLA class II histocompatibility antigen gamma chain                            |

---

**TargetNet Database**

---

| Num | Database  | Symbol  | Probability | Name                            |
|-----|-----------|---------|-------------|---------------------------------|
| 1   | TargetNet | CYP17A1 | 1           | Steroid 17-alpha-hydroxylase    |
| 2   | TargetNet | HSP90   | 1           | Heat shock protein HSP 90-alpha |
| 3   | TargetNet | AR      | 0.999       | Androgen receptor               |
| 4   | TargetNet | SLC5A1  | 0.995       | Sodium/glucose cotransporter 1  |
| 5   | TargetNet | HTR1E   | 0.933       | 5-hydroxytryptamine receptor 1E |

---

**SEA Database**

---

| Num | Database | Symbol   | MaxTC | Name                                              |
|-----|----------|----------|-------|---------------------------------------------------|
| 1   | SEA      | DHCR24   | 0.31  | Delta(24)-sterol reductase                        |
| 2   | SEA      | AMY2A    | 0.29  | Pancreatic alpha-amylase                          |
| 3   | SEA      | NPC1     | 0.31  | NPC intracellular cholesterol transporter 1       |
| 4   | SEA      | CYP17A1  | 0.32  | Steroid 17-alpha-hydroxylase/17,20 lyase          |
| 5   | SEA      | IL2      | 0.69  | Interleukin-2                                     |
| 6   | SEA      | NPC1L1   | 0.31  | NPC1-like intracellular cholesterol transporter 1 |
| 7   | SEA      | EBP      | 0.41  | 3-beta-hydroxysteroid-Delta(8),Delta(7)-isomerase |
| 8   | SEA      | ABCC4    | 0.32  | Multidrug resistance-associated protein 4         |
| 9   | SEA      | G6PD     | 0.31  | Glucose-6-phosphate 1-dehydrogenase               |
| 10  | SEA      | SERPINA6 | 0.29  | Corticosteroid-binding globulin                   |
| 11  | SEA      | GLI1     | 0.29  | Zinc finger protein GLI1                          |
| 12  | SEA      | POLA1    | 0.33  | DNA polymerase alpha catalytic subunit            |
| 13  | SEA      | SRD5A2   | 0.32  | 3-oxo-5-alpha-steroid 4-dehydrogenase 2           |
| 14  | SEA      | NR1H3    | 0.32  | Oxysterols receptor LXR-alpha                     |
| 15  | SEA      | SHH      | 0.29  | Sonic hedgehog protein                            |
| 16  | SEA      | SHBG     | 0.29  | Sex hormone-binding globulin                      |

---

**Abbreviations:** MaxTC, Max Tanimoto Coefficient

---

**Supplementary Table S2: Canonical pathway analysis by IPA for solasonine.** The canonical pathway analysis by IPA shows the enrichment of the potential target genes of solasonine in the canonical signaling pathway. Through IPA canonical pathway analysis of the potential target genes of solasonine, 494 remarkably (p-value  $\leq 0.05$ ) enriched canonical pathways were obtained.

| Ingenuity Canonical Pathways                                            | $-\log(p\text{-value})$ | Ratio | Molecules                                                                                      |
|-------------------------------------------------------------------------|-------------------------|-------|------------------------------------------------------------------------------------------------|
| HIPPO signaling                                                         | 6.66                    | 0.12  | BTRC,CUL1,NF2,PATJ,PPP2R1A,SFN,SKP1,STK4,YWHAH,YWHAQ                                           |
| Cell Cycle: G2/M DNA Damage Checkpoint Regulation                       | 6.44                    | 0.16  | BTRC,CUL1,EP300,SFN,SKP1,WEE1,YWHAH,YWHAQ                                                      |
| Isoleucine Degradation I                                                | 5.60                    | 0.29  | ACADSB,ACAT2,ECHS1,HSD17B10,HSD17B4<br>AR,B2M,CSF2RB,EP300,ESR1,GTF2F2,HLA-                    |
| Glucocorticoid Receptor Signaling                                       | 5.24                    | 0.04  | DRB1,HSP90AB1,IFNG,MMP1,MMP2,NCOA3,NDUFAB1,NFATC1,PC,PDK4,PPARG<br>,RAC1,RARA,RARG,TAF13,YWHAH |
| Epithelial Adherens Junction Signaling                                  | 5.01                    | 0.07  | ACVR2B,IGF1R,MAGI2,NF2,NOTCH1,PPP2R1A,RAC1,SFN,STK4,YWHAH,YWHA<br>Q                            |
| Tryptophan Degradation III (Eukaryotic)                                 | 4.80                    | 0.21  | ACAT2,HADH,HSD17B10,HSD17B4,KYNU                                                               |
| Neuroinflammation Signaling Pathway                                     | 4.66                    | 0.05  | ACVR2B,B2M,FAS,GAD2,HLA-                                                                       |
| IL-15 Production                                                        | 4.39                    | 0.08  | DRB1,HMOX1,IDE,IFNG,IFNGR1,KLK1,MAPK6,NFATC1,RAC1,TLR4,XIAP                                    |
| Fc $\gamma$ Receptor-mediated Phagocytosis in Macrophages and Monocytes | 4.38                    | 0.09  | ALK,BTK,CLK1,EPHA3,ERBB4,HCK,IGF1R,MATK,PTK2B                                                  |
| Hepatic Fibrosis / Hepatic Stellate Cell Activation                     | 4.19                    | 0.06  | ARF6,FCGR2A,HCK,HMOX1,PRKCB,PTK2B,RAC1,VAV3                                                    |
| Fatty Acid $\beta$ -oxidation I                                         | 4.16                    | 0.16  | CERT1,CYP2E1,FAS,FN1,IFNG,IFNGR1,IGF1R,MMP1,MMP2,TLR4,VEGFB                                    |
| Glutaryl-CoA Degradation                                                | 4.15                    | 0.24  | ECHS1,ECI2,HADH,HSD17B10,HSD17B4                                                               |
| Valine Degradation I                                                    | 3.85                    | 0.20  | ACAT2,HADH,HSD17B10,HSD17B4                                                                    |
| Cyclins and Cell Cycle Regulation                                       | 3.85                    | 0.08  | ACADSB,ECHS1,HIBCH,HSD17B4                                                                     |
| Role of Tissue Factor in Cancer                                         | 3.73                    | 0.07  | BTRC,CUL1,HDAC7,PA2G4,PPP2R1A,SKP1,WEE1                                                        |
| LPS/IL-1 Mediated Inhibition of RXR Function                            | 3.63                    | 0.05  | F2,F3,HBEGF,HCK,ITGB3,MMP1,PTK2B,RAC1                                                          |
| Pancreatic Adenocarcinoma Signaling                                     | 3.51                    | 0.06  | CYP2E1,CYP2R1,CYP7A1,FABP3,FABP7,GSTT2/GSTT2B,HMGCS1,NR1I3,RARA,S<br>ULT1A1,TLR4               |
| Reelin Signaling in Neurons                                             | 3.48                    | 0.06  | CYP2E1,HBEGF,HDAC7,HMOX1,NOTCH1,PA2G4,RAC1,VEGFB                                               |
| RAR Activation                                                          | 3.47                    | 0.05  | ARHGEF1,CDK5R1,HCK,PAFAH1B2,PDK2,PDK3,PDK4,RAC1                                                |
|                                                                         |                         |       | ADH1C,ADH7,CSF2RB,EP300,MMP1,PRKCB,RAC1,RARA,RARG,RBP5                                         |

|                                                                           |      |      |                                                              |
|---------------------------------------------------------------------------|------|------|--------------------------------------------------------------|
| Gαq Signaling                                                             | 3.34 | 0.05 | BTK,CAMK4,GRK2,HMOX1,NFATC1,PRKCB,PTK2B,RAC1,RND1            |
| Sumoylation Pathway                                                       | 3.32 | 0.07 | AR,EP300,FAS,RAC1,RND1,SENP2,XIAP                            |
| Iron homeostasis signaling pathway                                        | 3.30 | 0.06 | BMP1,BTRC,CIAO1,CUL1,HBB,HMOX1,HSCB,SKP1                     |
| IL-12 Signaling and Production in Macrophages                             | 3.28 | 0.06 | ALB,ALOX12,EP300,IFNG,IFNGR1,PPARG,PRKCB,TLR4                |
| HIF1α Signaling                                                           | 3.28 | 0.05 | APEX1,CAMK4,EP300,HK2,HMOX1,MMP1,MMP2,PRKCB,RAC1,VEGFB       |
| Sperm Motility                                                            | 3.25 | 0.05 | ALK,BTK,CAMK4,CLK1,EPHA3,ERBB4,HCK,IGF1R,MATK,PRKCB,PTK2B    |
| WNT/β-catenin Signaling                                                   | 3.24 | 0.05 | ACVR2B,APPL1,BTRC,CSNK1G1,CSNK1G2,EP300,PPP2R1A,RARA,RARG    |
| ERK/MAPK Signaling                                                        | 3.13 | 0.05 | ESR1,ITGB3,NFATC1,PPARG,PPP2R1A,PRKCB,PTK2B,RAC1,YWHAH,YWHAQ |
| Urate Biosynthesis/Inosine 5'-phosphate Degradation                       | 3.08 | 0.21 | ACP3,IMPDH1,NT5C3A                                           |
| Role of Osteoblasts, Osteoclasts and Chondrocytes in Rheumatoid Arthritis | 3.04 | 0.05 | BMP1,CAMK4,CSNK1G1,CSNK1G2,IFNG,ITGB3,MMP1,NFATC1,PTK2B,XIAP |
| Aryl Hydrocarbon Receptor Signaling                                       | 3.02 | 0.05 | EP300,ESR1,FAS,GSTT2/GSTT2B,HSP90AB1,NCOA3,RARA,RARG         |
| Colorectal Cancer Metastasis Signaling                                    | 3.00 | 0.04 | APPL1,GRK2,IFNG,IFNGR1,MMP1,MMP2,MSH2,RAC1,RND1,TLR4,VEGFB   |
| Telomere Extension by Telomerase                                          | 2.99 | 0.20 | HNRNPA2B1,POT1,XRCC6                                         |
| Neuregulin Signaling                                                      | 2.98 | 0.06 | CDK5R1,ERBB4,HBEGF,HSP90AB1,ITGB3,MATK,PRKCB                 |
| Production of Nitric Oxide and Reactive Oxygen Species in Macrophages     | 2.93 | 0.05 | ALB,IFNG,IFNGR1,MAP3K3,PPP2R1A,PRKCB,RAC1,RND1,TLR4          |
| Leukocyte Extravasation Signaling                                         | 2.92 | 0.05 | ARHGAP5,BTK,MMP1,MMP2,MSN,PRKCB,PTK2B,RAC1,VAV3              |
| Superpathway of Geranylgeranyldiphosphate Biosynthesis I (via Mevalonate) | 2.83 | 0.18 | ACAT2,GGPS1,HMGCS1                                           |
| LXR/RXR Activation                                                        | 2.82 | 0.06 | ALB,CYP7A1,ECHS1,GC,HADH,TLR4,TTR                            |
| HOTAIR Regulatory Pathway                                                 | 2.80 | 0.05 | AR,EP300,ESR1,MMP1,MMP2,TLR4,XIAP,YY1                        |
| GP6 Signaling Pathway                                                     | 2.80 | 0.06 | BTK,CAMK4,CERT1,ITGB3,PRKCB,RAC1,VAV3                        |
| Mitotic Roles of Polo-Like Kinase                                         | 2.77 | 0.08 | HSP90AB1,KIF11,PPP2R1A,SLK,WEE1                              |
| Antigen Presentation Pathway                                              | 2.76 | 0.11 | B2M,CD74,HLA-DRB1,IFNG                                       |
| p70S6K Signaling                                                          | 2.70 | 0.05 | BTK,F2,PPP2R1A,PRKCB,SFN,YWHAH,YWHAQ                         |
| Purine Nucleotides Degradation II (Aerobic)                               | 2.68 | 0.16 | ACP3,IMPDH1,NT5C3A                                           |
| Cell Cycle: G1/S Checkpoint Regulation                                    | 2.65 | 0.07 | BTRC,CUL1,HDAC7,PA2G4,SKP1                                   |
| IL-8 Signaling                                                            | 2.65 | 0.04 | HBEGF,HMOX1,ITGB3,MMP2,PRKCB,PTK2B,RAC1,RND1,VEGFB           |
| RHOGDI Signaling                                                          | 2.58 | 0.04 | ARHGAP5,ARHGEF1,EP300,ESR1,ITGB3,MSN,PIP4K2C,RAC1,RND1       |

|                                                        |      |      |                                                                            |
|--------------------------------------------------------|------|------|----------------------------------------------------------------------------|
| PI3K Signaling in B Lymphocytes                        | 2.55 | 0.05 | BTK,CAMK4,NFATC1,PRKCB,RAC1,TLR4,VAV3                                      |
| MSP-ROn Signaling In Cancer Cells Pathway              | 2.55 | 0.05 | CSF2RB,KLK1,PTK2B,SFN,VEGFB,YWHAH,YWHAQ                                    |
| Virus Entry via Endocytic Pathways                     | 2.51 | 0.06 | B2M,FLNB,ITGB3,ITSN1,PRKCB,RAC1                                            |
| NAD Salvage Pathway II                                 | 2.49 | 0.14 | ACP3,NMRK1,NT5C3A                                                          |
| Pyrimidine Deoxyribonucleotides De Novo Biosynthesis I | 2.49 | 0.14 | DTYMK,NME3,RRM1                                                            |
| iNOS Signaling                                         | 2.45 | 0.09 | CAMK4,IFNG,IFNGR1,TLR4                                                     |
| Caveolar-mediated Endocytosis Signaling                | 2.44 | 0.07 | ALB,B2M,FLNB,ITGB3,ITSN1                                                   |
| Glycoaminoglycan-protein Linkage Region Biosynthesis   | 2.43 | 0.29 | B3GAT2,B3GAT3                                                              |
| VDR/RXR Activation                                     | 2.39 | 0.06 | EP300,IFNG,NCOA3,PRKCB,YY1                                                 |
| Protein Ubiquitination Pathway                         | 2.38 | 0.04 | B2M,BTRC,CUL1,HSCB,HSP90AB1,IFNG,SKP1,SMURF2,USP19,XIAP                    |
| Neuroprotective Role of THOP1 in Alzheimer's Disease   | 2.37 | 0.05 | C1R,DPP4,FAP,IDE,IFNG,KLK1                                                 |
| Xenobiotic Metabolism Signaling                        | 2.37 | 0.04 | CAMK4,EP300,GSTT2/GSTT2B,HMOX1,HSP90AB1,MAP3K3,NR1I3,PPP2R1A,PRKCB,SULT1A1 |
| Phosphatidylethanolamine Biosynthesis II               | 2.31 | 0.25 | CHKA,PCYT2                                                                 |
| Natural Killer Cell Signaling                          | 2.28 | 0.04 | B2M,FCGR2A,IFNG,MAP3K3,NFATC1,PTK2B,RAC1,VAV3                              |
| ILK Signaling                                          | 2.28 | 0.04 | FLNB,FN1,ITGB3,MUC1,PPP2R1A,RAC1,RND1,VEGFB                                |
| Inhibition of ARE-Mediated mRNA Degradation Pathway    | 2.20 | 0.04 | EXOSC9,MAPK6,PARN,PPP2R1A,SFN,YWHAH,YWHAQ                                  |
| Superpathway of Cholesterol Biosynthesis               | 2.19 | 0.11 | ACAT2,GGPS1,HMGCS1                                                         |
| RHOA Signaling                                         | 2.17 | 0.05 | ARHGAP5,ARHGEF1,IGF1R,MSN,PIP4K2C,PTK2B                                    |
| CSDE1 Signaling Pathway                                | 2.17 | 0.07 | CSDE1,FABP7,FN1,RAC1                                                       |
| Serotonin Degradation                                  | 2.14 | 0.07 | ADH1C,ADH7,B3GAT3,SULT1A1                                                  |
| Protein Kinase A Signaling                             | 2.13 | 0.03 | APEX1,CAMK4,FLNB,NFATC1,PRKCB,PTK2B,PTPRE,PTPRF,PYGL,SFN,YWHAH,YWHAQ       |
| Molecular Mechanisms of Cancer                         | 2.13 | 0.03 | ARHGAP5,BMP1,EP300,FAS,HAT1,HDAC7,ITGB3,NOTCH1,PA2G4,PRKCB,RAC1,RND1,XIAP  |
| Senescence Pathway                                     | 2.12 | 0.03 | ACVR2B,CAMK4,EP300,MAPK6,NFATC1,PDHA1,PDK2,PDK3,PDK4,PPP2R1A               |
| FXR/RXR Activation                                     | 2.12 | 0.05 | ALB,CYP7A1,GC,PPARG,RARA,TTR                                               |

|                                                                                |      |      |                                                                          |
|--------------------------------------------------------------------------------|------|------|--------------------------------------------------------------------------|
| RANK Signaling in Osteoclasts                                                  | 2.12 | 0.06 | CAMK4,MAP3K3,NFATC1,PTK2B,XIAP                                           |
| Retinoic acid Mediated Apoptosis Signaling                                     | 2.12 | 0.07 | IFNG,PARP3,RARA,RARG                                                     |
| Noradrenaline and Adrenaline Degradation                                       | 2.11 | 0.10 | ADH1C,ADH7,PNMT                                                          |
| MSP-RON Signaling Pathway                                                      | 2.09 | 0.07 | CSF2RB,IFNG,KLK1,TLR4                                                    |
| Crosstalk between Dendritic Cells and Natural Killer Cells                     | 2.08 | 0.05 | CSF2RB,FAS,HLA-DRB1,IFNG,TLR4                                            |
| Xenobiotic Metabolism CAR Signaling Pathway                                    | 2.03 | 0.04 | EP300,GSTT2/GSTT2B,HSP90AB1,NR1I3,PPP2R1A,PRKCB,SULT1A1                  |
| Ketogenesis                                                                    | 2.02 | 0.18 | ACAT2,HMGCS1                                                             |
| Glycogen Degradation II                                                        | 2.02 | 0.18 | MTAP,PYGL                                                                |
| Purine Nucleotides De Novo Biosynthesis II                                     | 2.02 | 0.18 | GART,IMPDH1                                                              |
| Retinoate Biosynthesis I                                                       | 1.99 | 0.09 | ADH1C,ADH7,RBP5                                                          |
| Role of Macrophages, Fibroblasts and Endothelial Cells in Rheumatoid Arthritis | 1.95 | 0.03 | CAMK4,CSNK1G1,CSNK1G2,FN1,MMP1,NFATC1,PRKCB,RAC1,TLR4,VEGFB              |
| Tumor Microenvironment Pathway                                                 | 1.94 | 0.04 | FAS,FN1,ITGB3,MMP1,MMP2,RAC1,VEGFB                                       |
| Hepatic Fibrosis Signaling Pathway                                             | 1.94 | 0.03 | ACVR2B,CAMK4,CSNK1G1,CSNK1G2,ITGB3,MMP1,PPARG,PRKCB,RAC1,RND1,TLR4,VEGFB |
| HER-2 Signaling in Breast Cancer                                               | 1.92 | 0.04 | ARF6,HBEGF,HCK,ITGB3,MMP2,NUP214,PRKCB,XIAP                              |
| Xenobiotic Metabolism General Signaling Pathway                                | 1.92 | 0.04 | EP300,GSTT2/GSTT2B,HMOX1,MAP3K3,NR1I3,PRKCB                              |
| Coagulation System                                                             | 1.92 | 0.09 | F2,F3,SERPINA5                                                           |
| Glycogen Degradation III                                                       | 1.88 | 0.15 | MTAP,PYGL                                                                |
| Mevalonate Pathway I                                                           | 1.88 | 0.15 | ACAT2,HMGCS1                                                             |
| Guanosine Nucleotides Degradation III                                          | 1.88 | 0.15 | ACP3,NT5C3A                                                              |
| Opioid Signaling Pathway                                                       | 1.88 | 0.03 | CAMK4,EP300,GRK2,GRK6,HCK,MAPK6,PRKCB,RAC1,RGS6                          |
| Acute Phase Response Signaling                                                 | 1.87 | 0.04 | ALB,C1R,F2,FN1,HMOX1,RBP5,TTR                                            |
| Acyl Carrier Protein Metabolism                                                | 1.86 | 1.00 | AASDHPPT                                                                 |
| GNRH Signaling                                                                 | 1.86 | 0.04 | CAMK4,HBEGF,MAP3K3,MMP2,PRKCB,PTK2B,RAC1                                 |
| Osteoarthritis Pathway                                                         | 1.85 | 0.03 | FN1,ITGB3,MMP1,NOTCH1,PPARG,RAC1,TLR4,VEGFB                              |
| TEC Kinase Signaling                                                           | 1.84 | 0.03 | BTK,FAS,GTF2I,HCK,ITGB3,PRKCB,PTK2B,RAC1,RND1,TLR4,VAV3                  |
| tRNA Charging                                                                  | 1.82 | 0.08 | LARS1,WARS1,YARS1                                                        |
| Inhibition of Matrix Metalloproteases                                          | 1.82 | 0.08 | MMP1,MMP2,THBS2                                                          |

|                                                                      |      |      |                                                                            |
|----------------------------------------------------------------------|------|------|----------------------------------------------------------------------------|
| Glioma Invasiveness Signaling                                        | 1.79 | 0.06 | ITGB3,MMP2,RAC1,RND1                                                       |
| Sirtuin Signaling Pathway                                            | 1.78 | 0.03 | APEX1,G6PD,MAPK6,NDUFAB1,PDHA1,PGK1,PPARG,TIMM9,XRCC6                      |
| ERK5 Signaling                                                       | 1.77 | 0.06 | MAP3K3,SFN,YWHAH,YWHAQ                                                     |
| Axonal Guidance Signaling                                            | 1.76 | 0.03 | BMP1,EPHA3,ITGB3,ITSN1,MMP1,MMP2,MYSM1,NFATC1,PRKCB,RAC1,RND1,SEMA4D,VEGFB |
| Actin Cytoskeleton Signaling                                         | 1.75 | 0.03 | ARHGEF1,F2,FN1,ITGB3,MATK,MSN,RAC1,VAV3                                    |
| Estrogen Biosynthesis                                                | 1.74 | 0.07 | CYP2E1,HSD17B10,HSD17B4                                                    |
| Role of WNT/GSK-3 $\beta$ Signaling in the Pathogenesis of Influenza | 1.73 | 0.05 | CSNK1G1,CSNK1G2,IFNG,NCOA3                                                 |
| PI3K/AKT Signaling                                                   | 1.72 | 0.04 | CSF2RB,HSP90AB1,ITGB3,PPP2R1A,SFN,YWHAH,YWHAQ                              |
| Extrinsic Prothrombin Activation Pathway                             | 1.71 | 0.13 | F2,F3                                                                      |
| Adenosine Nucleotides Degradation II                                 | 1.71 | 0.13 | ACP3,NT5C3A                                                                |
| Bladder Cancer Signaling                                             | 1.69 | 0.04 | HDAC7,MMP1,MMP2,PA2G4,VEGFB                                                |
| MSP-RON Signaling In Macrophages Pathway                             | 1.69 | 0.04 | HLA-DRB1,IFNG,IFNGR1,KLK1,TLR4                                             |
| Macropinocytosis Signaling                                           | 1.69 | 0.05 | ARF6,ITGB3,PRKCB,RAC1                                                      |
| Estrogen-Dependent Breast Cancer Signaling                           | 1.67 | 0.05 | ESR1,HSD17B10,HSD17B4,IGF1R                                                |
| Estrogen Receptor Signaling                                          | 1.67 | 0.03 | EP300,ESR1,HSP90AB1,IGF1R,MMP1,MMP2,NCOA3,NDUFAB1,NOTCH1,PRKCB,VEGFB       |
| Granzyme A Signaling                                                 | 1.66 | 0.12 | APEX1,EP300                                                                |
| HMGB1 Signaling                                                      | 1.65 | 0.04 | HAT1,IFNG,IFNGR1,RAC1,RND1,TLR4                                            |
| Th1 Pathway                                                          | 1.65 | 0.04 | HLA-DRB1,IFNG,IFNGR1,NFATC1,NOTCH1                                         |
| BEX2 Signaling Pathway                                               | 1.62 | 0.05 | KLK1,MMP2,PPP2R1A,VEGFB                                                    |
| 1D-myo-inositol Hexakisphosphate Biosynthesis II (Mammalian)         | 1.61 | 0.11 | ITPK1,ITPKC                                                                |
| Phospholipase C Signaling                                            | 1.58 | 0.03 | ARHGEF1,BTK,CAMK4,EP300,FCGR2A,HDAC7,HMOX1,ITGB3,NFATC1,PRKCB,RAC1,RND1    |
| Glioma Signaling                                                     | 1.58 | 0.04 | CAMK4,HDAC7,IGF1R,PA2G4,PRKCB                                              |
| NRF2-mediated Oxidative Stress Response                              | 1.58 | 0.03 | CYP2E1,CYP2R1,EP300,GSTT2/GSTT2B,HMOX1,HSP90AB1,PRKCB                      |
| Ephrin A Signaling                                                   | 1.58 | 0.06 | EPHA3,RAC1,VAV3                                                            |
| S-methyl-5'-thioadenosine Degradation II                             | 1.57 | 0.50 | MTAP                                                                       |
| Sulfate Activation for Sulfonation                                   | 1.57 | 0.50 | PAPSS1                                                                     |



|                                                                     |      |      |                                                    |
|---------------------------------------------------------------------|------|------|----------------------------------------------------|
| Putrescine Biosynthesis III                                         | 1.57 | 0.50 | ODC1                                               |
| Glutamate Dependent Acid Resistance                                 | 1.57 | 0.50 | GAD2                                               |
| Th1 and Th2 Activation Pathway                                      | 1.56 | 0.04 | ACVR2B,HLA-DRB1,IFNG,IFNGR1,NFATC1,NOTCH1          |
| TR/RXR Activation                                                   | 1.55 | 0.05 | CAMK4,CYP7A1,EP300,NCOA3                           |
| Erythropoietin Signaling Pathway                                    | 1.55 | 0.04 | CSF2RB,HBB,IFNG,PRKCB,RAC1,XIAP                    |
| Androgen Signaling                                                  | 1.55 | 0.04 | AR,CAMK4,EP300,GTF2F2,PRKCB,TAF13                  |
| Atherosclerosis Signaling                                           | 1.53 | 0.04 | ALB,ALOX12,F3,IFNG,MMP1                            |
| Nicotine Degradation III                                            | 1.51 | 0.06 | ADH7,B3GAT3,CYP2E1                                 |
| Chondroitin Sulfate Biosynthesis                                    | 1.47 | 0.06 | B3GAT2,B3GAT3,SULT1A1                              |
| Tight Junction Signaling                                            | 1.45 | 0.03 | CSTF2,MAGI2,PATJ,PPP2R1A,RAC1,TJP1                 |
| Role of PKR in Interferon Induction and Antiviral Response          | 1.45 | 0.04 | FAS,HSP90AB1,IFNG,IFNGR1,TLR4                      |
| Melatonin Degradation I                                             | 1.44 | 0.06 | B3GAT3,CYP2E1,SULT1A1                              |
| NUR77 Signaling in T Lymphocytes                                    | 1.44 | 0.03 | B2M,CAMK4,EP300,HDAC7,HLA-DRB1,MAP3K3,NFATC1,PRKCB |
| Gα12/13 Signaling                                                   | 1.44 | 0.04 | ARHGEF1,BTK,F2,PTK2B,VAV3                          |
| Non-Small Cell Lung Cancer Signaling                                | 1.41 | 0.04 | FHIT,HDAC7,PA2G4,STK4                              |
| Superpathway of D-myo-inositol (1,4,5)-trisphosphate Metabolism     | 1.41 | 0.09 | IMPA2,ITPKC                                        |
| Dermatan Sulfate Biosynthesis                                       | 1.40 | 0.05 | B3GAT2,B3GAT3,SULT1A1                              |
| Nicotine Degradation II                                             | 1.40 | 0.05 | ADH7,B3GAT3,CYP2E1                                 |
| Death Receptor Signaling                                            | 1.40 | 0.04 | DFFA,FAS,PARP3,XIAP                                |
| Hepatic Cholestasis                                                 | 1.39 | 0.03 | CYP7A1,ESR1,IFNG,PRKCB,RARA,TLR4                   |
| RAC Signaling                                                       | 1.39 | 0.04 | CDK5R1,ITGB3,PIP4K2C,PTK2B,RAC1                    |
| 5-aminoimidazole Ribonucleotide Biosynthesis I                      | 1.39 | 0.33 | GART                                               |
| 1,25-dihydroxyvitamin D3 Biosynthesis                               | 1.39 | 0.33 | CYP2R1                                             |
| D-glucuronate Degradation I                                         | 1.39 | 0.33 | DCXR                                               |
| Hypusine Biosynthesis                                               | 1.39 | 0.33 | DHPS                                               |
| Geranylgeranyldiphosphate Biosynthesis                              | 1.39 | 0.33 | GGPS1                                              |
| Biotin-carboxyl Carrier Protein Assembly                            | 1.39 | 0.33 | ACACB                                              |
| 1D-myo-inositol Hexakisphosphate Biosynthesis V (from Ins(1,3,4)P3) | 1.39 | 0.33 | ITPK1                                              |

|                                                             |      |      |                                   |
|-------------------------------------------------------------|------|------|-----------------------------------|
| Tyrosine Biosynthesis IV                                    | 1.39 | 0.33 | PAH                               |
| Fatty Acid $\beta$ -oxidation III (Unsaturated, Odd Number) | 1.39 | 0.33 | ECI2                              |
| Tumoricidal Function of Hepatic Natural Killer Cells        | 1.37 | 0.08 | DFFA,FAS                          |
| Hereditary Breast Cancer Signaling                          | 1.37 | 0.04 | EP300,HDAC7,MSH2,SFN,WEE1         |
| VEGF Signaling                                              | 1.35 | 0.04 | PRKCB,PTK2B,SFN,VEGFB             |
| Superpathway of Melatonin Degradation                       | 1.35 | 0.05 | B3GAT3,CYP2E1,SULT1A1             |
| Gluconeogenesis I                                           | 1.34 | 0.08 | MDH1,PGK1                         |
| Semaphorin Signaling in Neurons                             | 1.33 | 0.05 | RAC1,RND1,SEMA4D                  |
| Role of JAK1, JAK2 and TYK2 in Interferon Signaling         | 1.31 | 0.08 | IFNG,IFNGR1                       |
| Clathrin-mediated Endocytosis Signaling                     | 1.31 | 0.03 | ALB,ARF6,F2,ITGB3,RAC1,VEGFB      |
| Adrenomedullin signaling pathway                            | 1.29 | 0.03 | CAMK4,MAPK6,MATK,MMP2,PPARG,PTK2B |
| Ethanol Degradation II                                      | 1.28 | 0.07 | ADH1C,ADH7                        |
| PD-1, PD-L1 cancer immunotherapy pathway                    | 1.28 | 0.04 | B2M,HLA-DRB1,IFNG,IFNGR1          |
| Retinoate Biosynthesis II                                   | 1.27 | 0.25 | RBP5                              |
| Pentose Phosphate Pathway (Oxidative Branch)                | 1.27 | 0.25 | G6PD                              |
| Heme Degradation                                            | 1.27 | 0.25 | HMOX1                             |
| Catecholamine Biosynthesis                                  | 1.27 | 0.25 | PNMT                              |
| Phenylethylamine Degradation I                              | 1.27 | 0.25 | AOC3                              |
| Glutathione Redox Reactions II                              | 1.27 | 0.25 | TXNDC12                           |
| Arginine Degradation I (Arginase Pathway)                   | 1.27 | 0.25 | OAT                               |
| Trans, trans-farnesyl Diphosphate Biosynthesis              | 1.27 | 0.25 | GGPS1                             |
| Phenylalanine Degradation I (Aerobic)                       | 1.27 | 0.25 | PAH                               |
| Telomerase Signaling                                        | 1.26 | 0.04 | HDAC7,HSP90AB1,POT1,PPP2R1A       |
| IGF-1 Signaling                                             | 1.26 | 0.04 | IGF1R,SFN,YWHAH,YWHAQ             |
| Induction of Apoptosis by HIV1                              | 1.26 | 0.05 | DFFA,FAS,XIAP                     |
| PTEN Signaling                                              | 1.26 | 0.03 | IGF1R,ITGB3,MAGI2,RAC1,YWHAH      |
| Paxillin Signaling                                          | 1.24 | 0.04 | ARF6,ITGB3,PTK2B,RAC1             |

|                                                                    |      |      |                                                                            |
|--------------------------------------------------------------------|------|------|----------------------------------------------------------------------------|
| eNOS Signaling                                                     | 1.24 | 0.03 | CAMK4,ESR1,HSP90AB1,PRKCB,VEGFB                                            |
| Oxidative Ethanol Degradation III                                  | 1.23 | 0.07 | CYP2E1,CYP2R1                                                              |
| Cardiac Hypertrophy Signaling (Enhanced)                           | 1.23 | 0.02 | ACVR2B,APEX1,CAMK4,CSF2RB,EP300,HDAC7,IFNG,IGF1R,ITGB3,MAP3K3,NFATC1,PRKCB |
| Heparan Sulfate Biosynthesis                                       | 1.21 | 0.05 | B3GAT2,B3GAT3,SULT1A1                                                      |
| mTOR Signaling                                                     | 1.21 | 0.03 | HMOX1,PPP2R1A,PRKCB,RAC1,RND1,VEGFB                                        |
| Prostate Cancer Signaling                                          | 1.20 | 0.04 | AR,HDAC7,HSP90AB1,PA2G4                                                    |
| Thrombin Signaling                                                 | 1.20 | 0.03 | ARHGEF1,CAMK4,F2,PRKCB,RAC1,RND1                                           |
| Integrin Signaling                                                 | 1.20 | 0.03 | ARF6,ARHGAP5,ASAP1,ITGB3,RAC1,RND1                                         |
| Ovarian Cancer Signaling                                           | 1.20 | 0.03 | HDAC7,MMP2,MSH2,PA2G4,VEGFB                                                |
| Regulation of Actin-based Motility by Rho                          | 1.19 | 0.04 | ITGB3,PIP4K2C,RAC1,RND1                                                    |
| B Cell Receptor Signaling                                          | 1.19 | 0.02 | BTK,CAMK4,FCGR2A,MAP3K3,NFATC1,PRKCB,PTK2B,RAC1,VAV3                       |
| Agrin Interactions at Neuromuscular Junction                       | 1.18 | 0.04 | ERBB4,RAC1,UTRN                                                            |
| Proline Biosynthesis II (from Arginine)                            | 1.18 | 0.20 | OAT                                                                        |
| Tetrahydrofolate Salvage from 5,10-methenyltetrahydrofolate        | 1.18 | 0.20 | GART                                                                       |
| NAD Salvage Pathway III                                            | 1.18 | 0.20 | NMRK1                                                                      |
| Lysine Degradation II                                              | 1.18 | 0.20 | AASDHPPT                                                                   |
| Myo-inositol Biosynthesis                                          | 1.18 | 0.20 | IMPA2                                                                      |
| Lysine Degradation V                                               | 1.18 | 0.20 | AASDHPPT                                                                   |
| Galactose Degradation I (Leloir Pathway)                           | 1.18 | 0.20 | GALM                                                                       |
| Lactose Degradation III                                            | 1.18 | 0.20 | PSAP                                                                       |
| Tyrosine Degradation I                                             | 1.18 | 0.20 | HPD                                                                        |
| Glutamate Degradation III (via 4-aminobutyrate)                    | 1.18 | 0.20 | GAD2                                                                       |
| Thyroid Hormone Metabolism II (via Conjugation and/or Degradation) | 1.15 | 0.06 | B3GAT3,SULT1A1                                                             |
| GM-CSF Signaling                                                   | 1.15 | 0.04 | CSF2RB,HCK,PRKCB                                                           |
| Nitric Oxide Signaling in the Cardiovascular System                | 1.15 | 0.04 | CAMK4,HSP90AB1,PRKCB,VEGFB                                                 |
| Signaling by Rho Family GTPases                                    | 1.14 | 0.03 | ARHGEF1,ITGB3,MSN,PIP4K2C,PTK2B,RAC1,RND1                                  |
| Airway Inflammation in Asthma                                      | 1.13 | 0.06 | IFNG,IFNGR1                                                                |

|                                                                  |      |      |                                                                                |
|------------------------------------------------------------------|------|------|--------------------------------------------------------------------------------|
| Pyrimidine Ribonucleotides Interconversion                       | 1.13 | 0.06 | CANT1,NME3                                                                     |
| Phagosome Formation                                              | 1.12 | 0.02 | ARF6,FCGR2A,FN1,HCK,HMOX1,HTR1A,ITGB3,MAPK6,PIP4K2C,PRKCB,PTK2B,RAC1,TLR4,VAV3 |
| Ephrin B Signaling                                               | 1.12 | 0.04 | ITSN1,RAC1,VAV3                                                                |
| Cholecystokinin/Gastrin-mediated Signaling                       | 1.11 | 0.03 | PRKCB,PTK2B,RAC1,RND1                                                          |
| PAK Signaling                                                    | 1.11 | 0.03 | EPHA3,ITGB3,PTK2B,RAC1                                                         |
| Fc Epsilon RI Signaling                                          | 1.10 | 0.03 | BTK,PRKCB,RAC1,VAV3                                                            |
| Arginine Biosynthesis IV                                         | 1.10 | 0.17 | OAT                                                                            |
| Trehalose Degradation II (Trehalase)                             | 1.10 | 0.17 | HK2                                                                            |
| Arginine Degradation VI (Arginase 2 Pathway)                     | 1.10 | 0.17 | OAT                                                                            |
| Acetyl-CoA Biosynthesis I (Pyruvate Dehydrogenase Complex)       | 1.10 | 0.17 | PDHA1                                                                          |
| Tryptophan Degradation to 2-amino-3-carboxymuconate Semialdehyde | 1.10 | 0.17 | KYNU                                                                           |
| Pyrimidine Ribonucleotides De Novo Biosynthesis                  | 1.08 | 0.06 | CANT1,NME3                                                                     |
| MIF-mediated Glucocorticoid Regulation                           | 1.06 | 0.06 | CD74,TLR4                                                                      |
| Interferon Signaling                                             | 1.06 | 0.06 | IFNG,IFNGR1                                                                    |
| Complement System                                                | 1.06 | 0.06 | C1R,C8A                                                                        |
| Ferroptosis Signaling Pathway                                    | 1.05 | 0.03 | ALOX12,ARF6,DPP4,HMOX1                                                         |
| Chemokine Signaling                                              | 1.05 | 0.04 | CAMK4,PRKCB,PTK2B                                                              |
| Phosphatidylcholine Biosynthesis I                               | 1.04 | 0.14 | CHKA                                                                           |
| Aspartate Degradation II                                         | 1.04 | 0.14 | MDH1                                                                           |
| IL-3 Signaling                                                   | 1.03 | 0.04 | CSF2RB,PRKCB,RAC1                                                              |
| Xenobiotic Metabolism AHR Signaling Pathway                      | 1.03 | 0.04 | EP300,GSTT2/GSTT2B,HSP90AB1                                                    |
| Xenobiotic Metabolism PXR Signaling Pathway                      | 1.02 | 0.03 | EP300,GSTT2/GSTT2B,HSP90AB1,PRKCB,SULT1A1                                      |
| 14-3-3-mediated Signaling                                        | 1.02 | 0.03 | PRKCB,SFN,YWHAH,YWHAQ                                                          |
| Dopamine-DARPP32 Feedback in cAMP Signaling                      | 1.02 | 0.03 | CAMK4,CSNK1G1,CSNK1G2,PPP2R1A,PRKCB                                            |

|                                                          |      |      |                                                   |
|----------------------------------------------------------|------|------|---------------------------------------------------|
| Role of BRCA1 in DNA Damage Response                     | 1.01 | 0.04 | IFNG,MSH2,POU2F1                                  |
| Systemic Lupus Erythematosus In T Cell Signaling Pathway | 0.99 | 0.02 | B2M,CAMK4,ESR1,FAS,HLA-DRB1,MSN,PPP2R1A,RAC1,RND1 |
| PPAR $\alpha$ /RXR $\alpha$ Activation                   | 0.99 | 0.03 | ACVR2B,EP300,HSP90AB1,NCOA3,PRKCB                 |
| fMLP Signaling in Neutrophils                            | 0.99 | 0.03 | CAMK4,NFATC1,PRKCB,RAC1                           |
| Sucrose Degradation V (Mammalian) Ketolysis              | 0.98 | 0.13 | GALM                                              |
|                                                          | 0.98 | 0.13 | ACAT2                                             |
| HGF Signaling                                            | 0.98 | 0.03 | ITGB3,MAP3K3,PRKCB,RAC1                           |
| Apelin Adipocyte Signaling Pathway                       | 0.98 | 0.04 | GSTT2/GSTT2B,MAPK6,RAC1                           |
| Intrinsic Prothrombin Activation Pathway                 | 0.97 | 0.05 | F2,KLK1                                           |
| PEDF Signaling                                           | 0.97 | 0.04 | FAS,PPARG,RAC1                                    |
| Adipogenesis pathway                                     | 0.96 | 0.03 | HAT1,HDAC7,PPARG,SENP2                            |
| Th2 Pathway                                              | 0.96 | 0.03 | ACVR2B,HLA-DRB1,IFNG,NOTCH1                       |
| LPS-stimulated MAPK Signaling                            | 0.96 | 0.04 | PRKCB,RAC1,TLR4                                   |
| BMP signaling pathway                                    | 0.96 | 0.04 | BMP1,CAMK4,XIAP                                   |
| Citrulline Biosynthesis                                  | 0.93 | 0.11 | OAT                                               |
| Glucocorticoid Biosynthesis                              | 0.93 | 0.11 | CYP17A1                                           |
| GDP-glucose Biosynthesis                                 | 0.93 | 0.11 | HK2                                               |
| MIF Regulation of Innate Immunity                        | 0.92 | 0.05 | CD74,TLR4                                         |
| Coronavirus Pathogenesis Pathway                         | 0.89 | 0.03 | AR,EP300,HDAC7,IFNG,PA2G4                         |
| Actin Nucleation by ARP-WASP Complex                     | 0.89 | 0.03 | ITGB3,RAC1,RND1                                   |
| Glucose and Glucose-1-phosphate Degradation              | 0.89 | 0.10 | HK2                                               |
| NAD Phosphorylation and Dephosphorylation                | 0.89 | 0.10 | ACP3                                              |
| Pentose Phosphate Pathway                                | 0.89 | 0.10 | G6PD                                              |
| Synaptogenesis Signaling Pathway                         | 0.89 | 0.02 | CAMK4,EPHA3,HCK,ITSN1,RAC1,SYT13,THBS2            |
| nNOS Signaling in Neurons                                | 0.88 | 0.04 | CAMK4,PRKCB                                       |
| PFKFB4 Signaling Pathway                                 | 0.88 | 0.04 | HK2,NCOA3                                         |
| Cardiac Hypertrophy Signaling                            | 0.87 | 0.02 | CAMK4,EP300,IGF1R,MAP3K3,RAC1,RND1                |
| Agranulocyte Adhesion and Diapedesis                     | 0.87 | 0.03 | AOC3,FN1,MMP1,MMP2,MSN                            |
| ERBB Signaling                                           | 0.87 | 0.03 | ERBB4,HBEGF,PRKCB                                 |
| Small Cell Lung Cancer Signaling                         | 0.86 | 0.03 | FHIT,HDAC7,PA2G4                                  |

|                                                              |      |      |                                                    |
|--------------------------------------------------------------|------|------|----------------------------------------------------|
| Semaphorin Neuronal Repulsive Signaling Pathway              | 0.86 | 0.03 | ITGB3,RAC1,RND1,SEMA4D                             |
| Ephrin Receptor Signaling                                    | 0.86 | 0.03 | EPHA3,ITGB3,ITSN1,RAC1,VEGFB                       |
| Dilated Cardiomyopathy Signaling Pathway                     | 0.85 | 0.03 | CAMK4,DSG2,MAP3K3,MYBPC3                           |
| NAD biosynthesis II (from tryptophan)                        | 0.85 | 0.09 | KYNU                                               |
| Sertoli Cell-Sertoli Cell Junction Signaling                 | 0.84 | 0.02 | ITGB3,MAGI2,MAP3K3,RAC1,TJP1                       |
| Salvage Pathways of Pyrimidine Ribonucleotides               | 0.84 | 0.03 | GRK6,MAPK6,NME3                                    |
| TGF- $\beta$ Signaling                                       | 0.84 | 0.03 | ACVR2B,EP300,SMURF2                                |
| T Cell Receptor Signaling                                    | 0.83 | 0.02 | B2M,CAMK4,HLA-DRB1,IFNG,NFATC1,PTK2B,RAC1,VAV3     |
| Amyloid Processing                                           | 0.83 | 0.04 | CDK5R1,MARK1                                       |
| FAT10 Cancer Signaling Pathway                               | 0.83 | 0.04 | ACVR2B,IFNG                                        |
| p53 Signaling                                                | 0.82 | 0.03 | EP300,FAS,SFN                                      |
| Cleavage and Polyadenylation of Pre-mRNA                     | 0.82 | 0.08 | CSTF2                                              |
| UDP-N-acetyl-D-galactosamine Biosynthesis II                 | 0.82 | 0.08 | HK2                                                |
| Necroptosis Signaling Pathway                                | 0.80 | 0.03 | FAS,PYGL,TIMM9,TLR4                                |
| Bile Acid Biosynthesis, Neutral Pathway                      | 0.79 | 0.08 | CYP7A1                                             |
| Apoptosis Signaling                                          | 0.79 | 0.03 | DFFA,FAS,XIAP                                      |
| Systemic Lupus Erythematosus In B Cell Signaling Pathway     | 0.78 | 0.02 | BTK,CAMK4,FCGR2A,HCK,IFNG,IFNGR1,NFATC1,PRKCB,RAC1 |
| $\alpha$ -Adrenergic Signaling                               | 0.77 | 0.03 | CAMK4,PRKCB,PYGL                                   |
| PPAR Signaling                                               | 0.77 | 0.03 | EP300,HSP90AB1,PPARG                               |
| G-Protein Coupled Receptor Signaling                         | 0.76 | 0.02 | APEX1,CAMK4,GRK2,HTR1A,PRKCB,PTK2B                 |
| DNA Double-Strand Break Repair by Non-Homologous End Joining | 0.76 | 0.07 | XRCC6                                              |
| Androgen Biosynthesis                                        | 0.76 | 0.07 | CYP17A1                                            |
| Choline Biosynthesis III                                     | 0.76 | 0.07 | HMOX1                                              |
| Phenylalanine Degradation IV (Mammalian, via Side Chain)     | 0.76 | 0.07 | HPD                                                |
| Aldosterone Signaling in Epithelial Cells                    | 0.75 | 0.03 | HSCB,HSP90AB1,PIP4K2C,PRKCB                        |
| Role of NFAT in Cardiac Hypertrophy                          | 0.75 | 0.02 | CAMK4,EP300,HDAC7,IGF1R,PRKCB                      |

|                                                             |      |      |                                   |
|-------------------------------------------------------------|------|------|-----------------------------------|
| Superpathway of Citrulline Metabolism                       | 0.73 | 0.07 | OAT                               |
| Methylglyoxal Degradation III                               | 0.73 | 0.07 | CYP2E1                            |
| Germ Cell-Sertoli Cell Junction Signaling                   | 0.71 | 0.02 | MAP3K3,RAC1,RND1,TJP1             |
| CDK5 Signaling                                              | 0.71 | 0.03 | CDK5R1,MAPK6,PPP2R1A              |
| Polyamine Regulation in Colon Cancer                        | 0.70 | 0.03 | ODC1,PPARG                        |
| Granzyme B Signaling                                        | 0.70 | 0.06 | DFFA                              |
| Mismatch Repair in Eukaryotes                               | 0.70 | 0.06 | MSH2                              |
| Pregnenolone Biosynthesis                                   | 0.70 | 0.06 | CYP2E1                            |
| Glioblastoma Multiforme Signaling                           | 0.70 | 0.02 | IGF1R,NF2,RAC1,RND1               |
| Airway Pathology in Chronic Obstructive Pulmonary Disease   | 0.70 | 0.03 | IFNG,MMP1,MMP2                    |
| Superpathway of Inositol Phosphate Compounds                | 0.70 | 0.02 | ITPK1,ITPKC,PIP4K2C,PPP2R1A,PTPRF |
| Amyotrophic Lateral Sclerosis Signaling                     | 0.69 | 0.03 | RAC1,VEGFB,XIAP                   |
| Sphingosine-1-phosphate Signaling                           | 0.68 | 0.03 | PTK2B,RAC1,RND1                   |
| D-myo-inositol (1,4,5)-trisphosphate Degradation            | 0.68 | 0.06 | IMPA2                             |
| FAK Signaling                                               | 0.67 | 0.03 | ASAP1,ITGB3,RAC1                  |
| PXR/RXR Activation                                          | 0.67 | 0.03 | CYP7A1,NR1I3                      |
| D-myo-inositol (1,3,4)-trisphosphate Biosynthesis           | 0.66 | 0.06 | ITPKC                             |
| Histidine Degradation VI                                    | 0.66 | 0.06 | CYP2E1                            |
| Renin-Angiotensin Signaling                                 | 0.65 | 0.03 | PRKCB,PTK2B,RAC1                  |
| Pyridoxal 5'-phosphate Salvage Pathway                      | 0.65 | 0.03 | GRK6,MAPK6                        |
| ERBB4 Signaling                                             | 0.64 | 0.03 | ERBB4,PRKCB                       |
| IL-17 Signaling                                             | 0.64 | 0.02 | HSP90AB1,IFNG,MMP2,VEGFB          |
| The Visual Cycle                                            | 0.64 | 0.05 | RBP5                              |
| DNA damage-induced 14-3-3 蠅 Signaling                       | 0.64 | 0.05 | SFN                               |
| Role of Lipids/Lipid Rafts in the Pathogenesis of Influenza | 0.62 | 0.05 | IFNG                              |
| Ubiquinol-10 Biosynthesis (Eukaryotic)                      | 0.62 | 0.05 | CYP2E1                            |
| Inflammasome pathway                                        | 0.62 | 0.05 | TLR4                              |

|                                                                                                    |      |      |                                                  |
|----------------------------------------------------------------------------------------------------|------|------|--------------------------------------------------|
| Synaptic Long Term Potentiation                                                                    | 0.61 | 0.02 | CAMK4,EP300,PRKCB                                |
| Melatonin Signaling                                                                                | 0.61 | 0.03 | CAMK4,PRKCB                                      |
| Growth Hormone Signaling                                                                           | 0.60 | 0.03 | IGF1R,PRKCB                                      |
| D-myo-inositol-5-phosphate Metabolism                                                              | 0.59 | 0.02 | ITPK1,PIP4K2C,PPP2R1A,PTPRF                      |
| IL-10 Signaling                                                                                    | 0.59 | 0.03 | FCGR2A,HMOX1                                     |
| Netrin Signaling                                                                                   | 0.59 | 0.03 | NFATC1,RAC1                                      |
| Hypoxia Signaling in the Cardiovascular System                                                     | 0.59 | 0.03 | EP300,HSP90AB1                                   |
| G Beta Gamma Signaling                                                                             | 0.59 | 0.02 | BTK,HBEGF,PRKCB                                  |
| IL-7 Signaling Pathway                                                                             | 0.58 | 0.03 | IFNG,NFATC1                                      |
| CCR3 Signaling in Eosinophils                                                                      | 0.58 | 0.02 | CAMK4,PRKCB,RAC1                                 |
| Role of NFAT in Regulation of the Immune Response                                                  | 0.57 | 0.02 | BTK,CAMK4,CSNK1G1,CSNK1G2,FCGR2A,HLA-DRB1,NFATC1 |
| Regulation Of The Epithelial Mesenchymal Transition By Growth Factors Pathway                      | 0.57 | 0.02 | MMP1,MMP2,RAC1,ZEB2                              |
| Role of MAPK Signaling in Inhibiting the Pathogenesis of Influenza                                 | 0.57 | 0.03 | IFNG,TLR4                                        |
| Differential Regulation of Cytokine Production in Intestinal Epithelial Cells by IL-17A and IL-17F | 0.57 | 0.04 | IFNG                                             |
| Dopamine Degradation                                                                               | 0.57 | 0.04 | SULT1A1                                          |
| Glutathione Redox Reactions I                                                                      | 0.57 | 0.04 | GSTT2/GSTT2B                                     |
| Gap Junction Signaling                                                                             | 0.56 | 0.02 | CSNK1G1,CSNK1G2,PRKCB,TJP1                       |
| GDNF Family Ligand-Receptor Interactions                                                           | 0.55 | 0.03 | DOK2,RAC1                                        |
| STAT3 Pathway                                                                                      | 0.55 | 0.02 | CSF2RB,IGF1R,RAC1                                |
| White Adipose Tissue Browning Pathway                                                              | 0.55 | 0.02 | PPARG,RARA,RARG                                  |
| Bupropion Degradation                                                                              | 0.55 | 0.04 | CYP2E1                                           |
| TCA Cycle II (Eukaryotic)                                                                          | 0.55 | 0.04 | MDH1                                             |
| Glycolysis I                                                                                       | 0.55 | 0.04 | PGK1                                             |
| Maturity Onset Diabetes of Young (MODY) Signaling                                                  | 0.55 | 0.03 | APPL1,EP300                                      |
| 3-phosphoinositide Biosynthesis                                                                    | 0.54 | 0.02 | ITPK1,PIP4K2C,PPP2R1A,PTPRF                      |



|                                                                                        |      |      |                                         |
|----------------------------------------------------------------------------------------|------|------|-----------------------------------------|
| NF-κB Activation by Viruses                                                            | 0.54 | 0.03 | ITGB3,PRKCB                             |
| Renal Cell Carcinoma Signaling                                                         | 0.54 | 0.03 | EP300,RAC1                              |
| Role of<br>Hypercytokinemia/hyperchemokine-<br>mia in the<br>Pathogenesis of Influenza | 0.52 | 0.03 | IFNG,TLR4                               |
| Estrogen-mediated S-phase Entry                                                        | 0.52 | 0.04 | ESR1                                    |
| D-myo-inositol (1,4,5)-Trisphosphate<br>Biosynthesis                                   | 0.52 | 0.04 | PIP4K2C                                 |
| Glutathione-mediated Detoxification                                                    | 0.52 | 0.04 | GSTT2/GSTT2B                            |
| Apelin Liver Signaling Pathway                                                         | 0.52 | 0.04 | FAS                                     |
| Calcium Signaling                                                                      | 0.50 | 0.02 | CAMK4,EP300,HDAC7,NFATC1                |
| VEGF Family Ligand-Receptor Interactions                                               | 0.50 | 0.02 | PRKCB,VEGFB                             |
| Role of p14/p19ARF in Tumor Suppression                                                | 0.50 | 0.04 | RAC1                                    |
| Role of Pattern Recognition Receptors in<br>Recognition of Bacteria and Viruses        | 0.49 | 0.02 | IFNG,PRKCB,TLR4                         |
| Factors Promoting Cardiogenesis in<br>Vertebrates                                      | 0.49 | 0.02 | ACVR2B,BMP1,PRKCB                       |
| Huntington's Disease Signaling                                                         | 0.49 | 0.02 | CDK5R1,EP300,HDAC7,IGF1R,PRKCB          |
| Autophagy                                                                              | 0.49 | 0.02 | CAMK4,DAPK2,PPP2R1A,TLR4                |
| Prolactin Signaling                                                                    | 0.48 | 0.02 | EP300,PRKCB                             |
| Sonic Hedgehog Signaling                                                               | 0.48 | 0.03 | GRK2                                    |
| Phagosome Maturation                                                                   | 0.48 | 0.02 | B2M,HLA-DRB1,RAC1                       |
| Lipid Antigen Presentation by CD1                                                      | 0.47 | 0.02 | ARF6,B2M,CD1A,PSAP                      |
| TNFR2 Signaling                                                                        | 0.46 | 0.03 | XIAP                                    |
| Acetone Degradation I (to Methylglyoxal)                                               | 0.46 | 0.03 | CYP2E1                                  |
| Acute Myeloid Leukemia Signaling                                                       | 0.46 | 0.02 | CSF2RB,RARA                             |
| IL-4 Signaling                                                                         | 0.46 | 0.02 | HLA-DRB1,NFATC1                         |
| PKC ̢ Signaling in T Lymphocytes                                                       | 0.45 | 0.02 | HLA-DRB1,MAP3K3,NFATC1,POU2F1,RAC1,VAV3 |
| Role of JAK2 in Hormone-like Cytokine<br>Signaling                                     | 0.45 | 0.03 | SH2B2                                   |
| Melanocyte Development and Pigmentation<br>Signaling                                   | 0.43 | 0.02 | EP300,SH2B2                             |

|                                                         |      |      |                                    |
|---------------------------------------------------------|------|------|------------------------------------|
| cAMP-mediated signaling                                 | 0.43 | 0.02 | APEX1,CAMK4,GRK2,HTR1A             |
| Nucleotide Excision Repair Pathway                      | 0.42 | 0.03 | RPA3                               |
| NF-κB Signaling                                         | 0.41 | 0.02 | BTRC,EP300,IGF1R,MAP3K3,PRKCB,TLR4 |
| Apelin Cardiomyocyte Signaling Pathway                  | 0.41 | 0.02 | MAPK6,PRKCB                        |
| CXCR4 Signaling                                         | 0.41 | 0.02 | PRKCB,RAC1,RND1                    |
| B Cell Development                                      | 0.41 | 0.03 | HLA-DRB1                           |
| TWEAK Signaling                                         | 0.41 | 0.03 | XIAP                               |
| Mitochondrial Dysfunction                               | 0.41 | 0.02 | HSD17B10,NDUFAB1,PDHA1             |
| Neuropathic Pain Signaling In Dorsal Horn Neurons       | 0.40 | 0.02 | CAMK4,PRKCB                        |
| Cell Cycle Regulation by BTG Family Proteins            | 0.40 | 0.03 | PPP2R1A                            |
| Notch Signaling                                         | 0.40 | 0.03 | NOTCH1                             |
| Type I Diabetes Mellitus Signaling                      | 0.40 | 0.02 | FAS,GAD2,HLA-DRB1,IFNG,IFNGR1      |
| IL-17A Signaling in Fibroblasts                         | 0.39 | 0.03 | MMP1                               |
| NER (Nucleotide Excision Repair, Enhanced Pathway)      | 0.39 | 0.02 | EP300,RPA3                         |
| D-myo-inositol (1,4,5,6)-Tetrakisphosphate Biosynthesis | 0.38 | 0.02 | ITPK1,PPP2R1A,PTPRF                |
| D-myo-inositol (3,4,5,6)-tetrakisphosphate Biosynthesis | 0.38 | 0.02 | ITPK1,PPP2R1A,PTPRF                |
| Cardiac β-adrenergic Signaling                          | 0.38 | 0.02 | APEX1,GRK2,PPP2R1A                 |
| Retinol Biosynthesis                                    | 0.37 | 0.03 | RBP5                               |
| Granulocyte Adhesion and Diapedesis                     | 0.37 | 0.02 | MMP1,MMP2,MSN                      |
| Chronic Myeloid Leukemia Signaling                      | 0.37 | 0.02 | HDAC7,PA2G4                        |
| Antioxidant Action of Vitamin C                         | 0.37 | 0.02 | CSF2RB,HMOX1                       |
| Mechanisms of Viral Exit from Host Cells                | 0.37 | 0.02 | PRKCB                              |
| Allograft Rejection Signaling                           | 0.37 | 0.02 | B2M,FAS,HLA-DRB1,IFNG              |
| April Mediated Signaling                                | 0.36 | 0.02 | NFATC1                             |
| Dermatan Sulfate Biosynthesis (Late Stages)             | 0.36 | 0.02 | SULT1A1                            |
| Serotonin Receptor Signaling                            | 0.36 | 0.02 | HTR1A                              |
| B Cell Activating Factor Signaling                      | 0.35 | 0.02 | NFATC1                             |

|                                                                      |      |      |                                        |
|----------------------------------------------------------------------|------|------|----------------------------------------|
| Oncostatin M Signaling                                               | 0.35 | 0.02 | MMP1                                   |
| Role of RIG1-like Receptors in Antiviral Innate Immunity             | 0.34 | 0.02 | EP300                                  |
| tRNA Splicing                                                        | 0.34 | 0.02 | APEX1                                  |
| Chondroitin Sulfate Biosynthesis (Late Stages)                       | 0.34 | 0.02 | SULT1A1                                |
| BER (Base Excision Repair) Pathway                                   | 0.34 | 0.02 | APEX1                                  |
| Calcium-induced T Lymphocyte Apoptosis                               | 0.34 | 0.02 | CAMK4,EP300,HLA-DRB1,PRKCB             |
| Role of OCT4 in Mammalian Embryonic Stem Cell Pluripotency           | 0.34 | 0.02 | RARA                                   |
| 3-phosphoinositide Degradation                                       | 0.34 | 0.02 | ITPK1,PPP2R1A,PTPRF                    |
| Endothelin-1 Signaling                                               | 0.33 | 0.02 | HMOX1,MAPK6,PRKCB                      |
| Synaptic Long Term Depression                                        | 0.32 | 0.02 | IGF1R,PPP2R1A,PRKCB                    |
| NGF Signaling                                                        | 0.32 | 0.02 | MAP3K3,RAC1                            |
| nNOS Signaling in Skeletal Muscle Cells                              | 0.32 | 0.02 | CAMK4                                  |
| Regulation of IL-2 Expression in Activated and Anergic T Lymphocytes | 0.31 | 0.02 | CAMK4,NFATC1,RAC1,VAV3                 |
| Insulin Secretion Signaling Pathway                                  | 0.31 | 0.02 | HCK,PC,PDHA1,PRKCB                     |
| Primary Immunodeficiency Signaling                                   | 0.31 | 0.02 | BTK                                    |
| Spliceosomal Cycle                                                   | 0.31 | 0.02 | SF3B6                                  |
| Systemic Lupus Erythematosus Signaling                               | 0.31 | 0.01 | C8A,CAMK4,FCGR2A,HNRNPA2B1,KLK1,NFATC1 |
| Regulation of the Epithelial-Mesenchymal Transition Pathway          | 0.31 | 0.02 | MMP2,NOTCH1,ZEB2                       |
| MYC Mediated Apoptosis Signaling                                     | 0.30 | 0.02 | FAS                                    |
| TNFR1 Signaling                                                      | 0.30 | 0.02 | XIAP                                   |
| Assembly of RNA Polymerase II Complex                                | 0.30 | 0.02 | TAF13                                  |
| Endocannabinoid Developing Neuron Pathway                            | 0.30 | 0.02 | MAPK6,RAC1                             |
| UVC-Induced MAPK Signaling                                           | 0.30 | 0.02 | PRKCB                                  |
| Role of Cytokines in Mediating Communication between Immune Cells    | 0.29 | 0.02 | IFNG                                   |
| Stearate Biosynthesis I (Animals)                                    | 0.29 | 0.02 | CYP2E1                                 |

|                                                             |      |      |                                                   |
|-------------------------------------------------------------|------|------|---------------------------------------------------|
| UVB-Induced MAPK Signaling                                  | 0.29 | 0.02 | PRKCB                                             |
| P2Y Purigenic Receptor Signaling Pathway                    | 0.28 | 0.02 | ITGB3,PRKCB                                       |
| Lymphotoxin $\beta$ Receptor Signaling                      | 0.28 | 0.02 | EP300                                             |
| Transcriptional Regulatory Network in Embryonic Stem Cells  | 0.28 | 0.02 | ZIC3                                              |
| FAT10 Signaling Pathway                                     | 0.28 | 0.02 | IFNG                                              |
| CD27 Signaling in Lymphocytes                               | 0.27 | 0.02 | MAP3K3                                            |
| SPINK1 Pancreatic Cancer Pathway                            | 0.27 | 0.02 | KLK1                                              |
| Cell Cycle Control of Chromosomal Replication               | 0.27 | 0.02 | RPA3                                              |
| Altered T Cell and B Cell Signaling in Rheumatoid Arthritis | 0.27 | 0.01 | FAS,HLA-DRB1,IFNG,TLR4                            |
| Role of CHK Proteins in Cell Cycle Checkpoint Control       | 0.26 | 0.02 | PPP2R1A                                           |
| Breast Cancer Regulation by Stathmin1                       | 0.26 | 0.01 | ARHGEF1,CAMK4,HTR1A,MMP2,PPP2R1A,PRKCB,RAC1,VEGFB |
| Role of IL-17A in Arthritis                                 | 0.26 | 0.02 | MMP1                                              |
| T Cell Exhaustion Signaling Pathway                         | 0.26 | 0.01 | ACVR2B,HLA-DRB1,IFNG,NFATC1,PPP2R1A               |
| EIF2 Signaling                                              | 0.26 | 0.01 | IGF1R,WARS1,XIAP                                  |
| Heparan Sulfate Biosynthesis (Late Stages)                  | 0.25 | 0.02 | SULT1A1                                           |
| PCP (Planar Cell Polarity) Pathway                          | 0.25 | 0.02 | RAC1                                              |
| Apelin Endothelial Signaling Pathway                        | 0.25 | 0.01 | CAMK4,PRKCB                                       |
| IL-2 Signaling                                              | 0.25 | 0.02 | PTK2B                                             |
| Phospholipases                                              | 0.24 | 0.02 | HMOX1                                             |
| Thrombopoietin Signaling                                    | 0.24 | 0.02 | PRKCB                                             |
| Role of PI3K/AKT Signaling in the Pathogenesis of Influenza | 0.24 | 0.02 | IFNG                                              |
| WNT/Ca <sup>+</sup> pathway                                 | 0.24 | 0.02 | NFATC1                                            |
| Endocannabinoid Cancer Inhibition Pathway                   | 0.24 | 0.01 | MMP2,VEGFB                                        |
| NAD Signaling Pathway                                       | 0.23 | 0.01 | NMRK1,PARP3                                       |
| Corticotropin Releasing Hormone Signaling                   | 0.23 | 0.01 | CAMK4,PRKCB                                       |
| Glutamate Receptor Signaling                                | 0.23 | 0.02 | CAMK4                                             |
| Eicosanoid Signaling                                        | 0.23 | 0.02 | ALOX12                                            |

|                                                             |      |      |                               |
|-------------------------------------------------------------|------|------|-------------------------------|
| Remodeling of Epithelial Adherens Junctions                 | 0.22 | 0.02 | ARF6                          |
| Role of JAK1 and JAK3 in $\gamma$ c Cytokine Signaling      | 0.22 | 0.01 | PTK2B                         |
| Basal Cell Carcinoma Signaling                              | 0.21 | 0.01 | BMP1                          |
| TREM1 Signaling                                             | 0.20 | 0.01 | TLR4                          |
| Ceramide Signaling                                          | 0.00 | 0.01 | PPP2R1A                       |
| Fc $\gamma$ RIIB Signaling in B Lymphocytes                 | 0.00 | 0.01 | BTK                           |
| CCR5 Signaling in Macrophages                               | 0.00 | 0.01 | CAMK4,FAS,PRKCB,PTK2B         |
| Cytotoxic T Lymphocyte-mediated Apoptosis of Target Cells   | 0.00 | 0.01 | B2M,DFFA,FAS                  |
| CTLA4 Signaling in Cytotoxic T Lymphocytes                  | 0.00 | 0.01 | B2M,PPP2R1A                   |
| T Helper Cell Differentiation                               | 0.00 | 0.01 | HLA-DRB1,IFNG,IFNGR1          |
| CD28 Signaling in T Helper Cells                            | 0.00 | 0.01 | CAMK4,HLA-DRB1,NFATC1,RAC1    |
| Dendritic Cell Maturation                                   | 0.00 | 0.01 | B2M,CD1A,FCGR2A,HLA-DRB1,TLR4 |
| Angiopoietin Signaling                                      | 0.00 | 0.01 | DOK2                          |
| Cellular Effects of Sildenafil (Viagra)                     | 0.00 | 0.01 | CAMK4                         |
| Relaxin Signaling                                           | 0.00 | 0.01 | APEX1                         |
| ICOS-ICOSL Signaling in T Helper Cells                      | 0.00 | 0.01 | CAMK4,HLA-DRB1,NFATC1,RAC1    |
| Human Embryonic Stem Cell Pluripotency                      | 0.00 | 0.01 | BMP1,ZIC3                     |
| ATM Signaling                                               | 0.00 | 0.01 | PPP2R1A                       |
| Role of NANOG in Mammalian Embryonic Stem Cell Pluripotency | 0.00 | 0.01 | BMP1                          |
| CREB Signaling in Neurons                                   | 0.00 | 0.01 | CAMK4,EP300,HTR1A,IGF1R,PRKCB |
| Autoimmune Thyroid Disease Signaling                        | 0.00 | 0.01 | FAS,HLA-DRB1                  |
| Thyroid Cancer Signaling                                    | 0.00 | 0.01 | ALK                           |
| Graft-versus-Host Disease Signaling                         | 0.00 | 0.01 | FAS,HLA-DRB1,IFNG             |
| Type II Diabetes Mellitus Signaling                         | 0.00 | 0.01 | PPARG,PRKCB                   |
| Communication between Innate and Adaptive Immune Cells      | 0.00 | 0.01 | B2M,HLA-DRB1,IFNG,TLR4        |
| CDC42 Signaling                                             | 0.00 | 0.01 | B2M,HLA-DRB1,ITGB3            |
| AMPK Signaling                                              | 0.00 | 0.01 | ACACB,EP300,PPP2R1A           |

|                                                                            |      |      |                      |
|----------------------------------------------------------------------------|------|------|----------------------|
| Regulation of eIF4 and p70S6K Signaling                                    | 0.00 | 0.01 | ITGB3,PPP2R1A        |
| Role of MAPK Signaling in the Pathogenesis of Influenza                    | 0.00 | 0.01 | IFNG                 |
| Antiproliferative Role of TOB in T Cell Signaling                          | 0.00 | 0.01 | CUL1,SKP1            |
| OX40 Signaling Pathway                                                     | 0.00 | 0.01 | B2M,HLA-DRB1         |
| Mouse Embryonic Stem Cell Pluripotency                                     | 0.00 | 0.01 | XIAP                 |
| Gαi Signaling                                                              | 0.00 | 0.01 | HTR1A                |
| Gαs Signaling                                                              | 0.00 | 0.01 | HCK                  |
| Regulation of Cellular Mechanics by Calpain Protease                       | 0.00 | 0.01 | ITGB3                |
| UVA-Induced MAPK Signaling                                                 | 0.00 | 0.01 | PARP3                |
| Oxidative Phosphorylation                                                  | 0.00 | 0.01 | NDUFAB1              |
| Unfolded protein response                                                  | 0.00 | 0.01 | PPARG                |
| Toll-like Receptor Signaling                                               | 0.00 | 0.01 | TLR4                 |
| SAPK/JNK Signaling                                                         | 0.00 | 0.01 | MAP3K3,NFATC1,RAC1   |
| FGF Signaling                                                              | 0.00 | 0.01 | RAC1                 |
| GABA Receptor Signaling                                                    | 0.00 | 0.01 | GAD2                 |
| Insulin Receptor Signaling                                                 | 0.00 | 0.01 | PTPRF                |
| Dopamine Receptor Signaling                                                | 0.00 | 0.01 | PPP2R1A              |
| p38 MAPK Signaling                                                         | 0.00 | 0.01 | FAS                  |
| PDGF Signaling                                                             | 0.00 | 0.01 | PRKCB                |
| GPCR-Mediated Nutrient Sensing in Enteroendocrine Cells                    | 0.00 | 0.01 | PRKCB                |
| Gustation Pathway                                                          | 0.00 | 0.01 | HTR1A,SLC5A1         |
| Th17 Activation Pathway                                                    | 0.00 | 0.01 | HSP90AB1,IFNG,NFATC1 |
| Endocannabinoid Neuronal Synapse Pathway                                   | 0.00 | 0.01 | MAPK6                |
| BAG2 Signaling Pathway                                                     | 0.00 | 0.01 | ATXN3                |
| Regulation Of The Epithelial Mesenchymal Transition In Development Pathway | 0.00 | 0.01 | NOTCH1               |
| Kinetochore Metaphase Signaling Pathway                                    | 0.00 | 0.01 | NDC80                |

**Supplementary Table S3: Disease and functional analysis by IPA for solasonine.** The disease and functional analysis by IPA was performed to evaluate the correlation between solasonine and other diseases or functions. Through IPA disease and functional analysis of the potential target genes of solasonine, 500 remarkably diseases or functions annotation involved in 103 categories (p-value  $\leq 0.05$ , sorted by p-value) were obtained.

| No | Diseases or Functions Annotation | Categories                                                             | p-value  | Molecules number | Molecules list                                                                                                                                                                                                                                                                                                                                                                                                                                                                                                                                                                                                 |
|----|----------------------------------|------------------------------------------------------------------------|----------|------------------|----------------------------------------------------------------------------------------------------------------------------------------------------------------------------------------------------------------------------------------------------------------------------------------------------------------------------------------------------------------------------------------------------------------------------------------------------------------------------------------------------------------------------------------------------------------------------------------------------------------|
| 1  | Necrosis                         | Cell Death and Survival                                                | 1.13E,21 | 107              | ACVR2B,ALB,ALK,ALOX12,ANG,APEX1,APPL1,AR,ATP7B,ATXN3,B2M,BPI,BTK,BTRC,CAMK4,CD74,CDK5R1,CHKA,CSF2RB,CTCF,CUL1,CYP2E1,DAPK2,DCTD,DFFA,DPP4,DSG2,DTYMK,EP300,ERBB4,ESR1,F2,F3,FABP3,FABP7,FAP,FAS,FHIT,FLNB,FN1,G6PD,GALNT10,GART,GGPS1,GRK2,GRK6,GTGF2F2,HAT1,HBB,HBEGF,HCK,HK2,HMGCS1,HMOX1,HSD17B10,HSP90AB1,IDE,IFNG,IGF1R,IQUB,ITGB3,ITPK1,ITSN1,KIF11,MMP2,MSH2,MSN,MUC1,NAE1,NCOA3,NDC80,NDUFAB1,NF2,NFATC1,NOTCH1,PA2G4,PDHA1,PDK2,PEX5,POT1,PPARG,PPP2R1A,PRKCB,PTK2B,PUS10,RAC1,RARA,RARG,RBBP6,RRM1,S100A6,SEMA4D,SFN,SKP1,SMURF2,SNX1,STK4,TLR4,TNFAIP8L2,VAV3,WEE1,XIAP,XRCC6,YARS1,YWHAH,YWHAQ,YY1 |
| 2  | Apoptosis                        | Cell Death and Survival                                                | 2.37E,19 | 97               | ACVR2B,ALB,ALK,ALOX12,APEX1,APPL1,AR,ARHGEF1,B2M,BPI,BTK,BTRC,CD74,CDK5R1,CHKA,CSF2RB,CTCF,CUL1,CYP2E1,DAPK2,DFFA,DPP4,DSG2,DTYMK,EP300,ERBB4,ESR1,F2,F3,FAP,FAS,FHIT,FLNB,FN1,G6PD,GALNT10,GRK2,HAT1,HBB,HBEGF,HCK,HK2,HMOX1,HSD17B10,HSP90AB1,IDE,IFNG,IGF1R,ITGB3,ITPK1,ITSN1,KIF11,KMT5A,MAGEA4,MMP2,MSH2,MSN,MUC1,NAE1,NCOA3,NDC80,NF2,NFATC1,NOTCH1,ODC1,PA2G4,PDHA1,PDK4,PEX5,POT1,PPARG,PPP2R1A,PRKCB,PTK2B,PUS10,RAC1,RARA,RARG,RBBP6,RRM1,S100A6,SEMA4D,SFN,SLK,SMURF2,SNX1,STK4,SUB1,TJP1,TLR4,VAV3,WEE1,XIAP,XRCC6,YARS1,YWHAQ,YY1                                                                 |
| 3  | Cell death of tumor cell lines   | Cell Death and Survival                                                | 5.24E,17 | 86               | ACVR2B,ALB,ALK,ALOX12,ANG,APEX1,APPL1,AR,B2M,BTK,BTRC,CAMK4,CD74,CDK5R1,CHKA,CSF2RB,CTCF,CUL1,CYP2E1,DAPK2,DCTD,DFFA,DPP4,DSG2,DTYMK,EP300,ERBB4,ESR1,FABP7,FAP,FAS,FHIT,FLNB,FN1,G6PD,GALNT10,GRK2,HAT1,HBEGF,HCK,HK2,HMGCS1,HMOX1,HSP90AB1,IDE,IFNG,IGF1R,IQUB,ITGB3,ITPK1,KIF11,MSH2,MSN,MUC1,NCOA3,NDC80,NF2,NOTCH1,PA2G4,PDHA1,PDK2,PEX5,POT1,PPARG,PPP2R1A,PRKCB,PTK2B,PUS10,RAC1,RARA,RARG,RBBP6,RRM1,S100A6,SFN,SMURF2,SNX1,STK4,TLR4,VAV3,WEE1,XIAP,XRCC6,YARS1,YWHAH,YY1                                                                                                                             |
| 4  | Lymphatic system tumor           | Cancer,Organismal Injury and Abnormalities                             | 7.41E,15 | 104              | ALB,ALK,ALOX12,ANXA6,AR,ARHGAP5,ARHGEF1,ATXN3,B2M,BCR,BTK,C1R,C8A,CD1A,CD74,CDK5R1,CIAO1,CLK1,CSDE1,CSF2RB,CSNK1G2,CSTF2,CTCF,DGKA,DPP4,ECHS1,ECI2,EP300,EPHA3,ERBB4,ESR1,F2,F3,FAP,FAS,FCGR2A,FHIT,FN1,GAD2,GART,GGPS1,GRHPR,GRK2,GTGF2F2,GTGF2I,HASPIN,HAT1,HCK,HDAC7,HLADRB1,HMOX1,HNRNPA2B1,HSP90AB1,IFNG,IGF1R,IMPDH1,IQUB,ITGB3,ITPK1,LRBA,MAGI2,MARK1,MMP1,MMP2,MUC1,NAE1,NCBP1,NCOA3,NDC80,NFATC1,NOTCH1,NT5C3A,NUP214,ODC1,PC,PGC,PGK1,POT1,POU2F1,PRKCB,PTK2B,PTPRE,PTPRF,PYGL,RAC1,RARA,RARG,RRM1,SEM1,SH2B2,SLC5A1,SMG5,SNX1,SYT13,TAF13,THBS2,TJP1,TLR4,TXNDC12,VAV3,XIAP,XRCC6,ZEB2,ZNF292       |
| 5  | Lymphoid cancer                  | Cancer,Organismal Injury and Abnormalities                             | 1.02E,14 | 103              | ALB,ALK,ALOX12,ANXA6,ARHGAP5,ARHGEF1,ATXN3,B2M,BCR,BTK,C1R,C8A,CD1A,CD74,CDK5R1,CIAO1,CLK1,CSDE1,CSF2RB,CSNK1G2,CSTF2,CTCF,DGKA,DPP4,ECHS1,ECI2,EP300,EPHA3,ERBB4,ESR1,F2,F3,FAP,FAS,FCGR2A,FHIT,FN1,GAD2,GART,GGPS1,GRHPR,GRK2,GTGF2F2,GTGF2I,HASPIN,HAT1,HCK,HDAC7,HLADRB1,HMOX1,HNRNPA2B1,HSP90AB1,IFNG,IGF1R,IMPDH1,IQUB,ITGB3,ITPK1,LRBA,MAGI2,MARK1,MMP1,MMP2,MUC1,NAE1,NCBP1,NCOA3,NDC80,NFATC1,NOTCH1,NT5C3A,NUP214,ODC1,PC,PGC,PGK1,POT1,POU2F1,PRKCB,PTK2B,PTPRE,PTPRF,PYGL,RAC1,RARA,RARG,RRM1,SEM1,SH2B2,SLC5A1,SMG5,SNX1,SYT13,TAF13,THBS2,TJP1,TLR4,TXNDC12,VAV3,XIAP,XRCC6,ZEB2,ZNF292          |
| 6  | Ductal breast carcinoma          | Cancer,Organismal Injury and Abnormalities,Reproductive System Disease | 1.20E,14 | 54               | ACACB,AR,BTK,CAMK4,CSNK1G1,CTCF,DAPK2,DPP4,EP300,EPHA3,ERBB4,ESR1,FAP,FLNB,FN1,GRK2,GRK6,HDAC7,HSP90AB1,IGF1R,ITPKC,KIF11,KMT5A,MAPK6,MARK1,MMP2,MSH2,MSN,NCOA3,NDC80,NF2,NFATC1,NOTCH1,OXSR1,PARP3,PDK3,PDK4,PHF24,POU2F1,PPP2R1A,PRKCB,PTPRE,PTPRF,RAC1,RARA,RBBP6,RBM39,RRM1,SEN2,SLK,SMURF2,TLR4,VAV3,ZEB2                                                                                                                                                                                                                                                                                                 |
| 7  | Advanced stage tumor             | Cancer,Organismal Injury and Abnormalities                             | 1.52E,14 | 54               | ALB,ALK,AOC3,AR,B2M,BCR,BMP1,BTK,C1R,CD74,CSF2RB,CYP17A1,DPP4,DSG2,EP300,EPHA3,ERBB4,ESR1,F2,F3,FAS,FCGR2A,FN1,GAD2,GART,GGPS1,HCK,HLA,DRB1,HMOX1,HSP90AB1,HTR1A,IFNG,IGF1R,IMPDH1,MMP1,MMP2,MSH2,MUC1,NF2,NOTCH1,NR1I3,PARP3,PGC,PPP2R1A,PTK2B,RAC1,RARA,RARG,RRM1,SH2B2,SKP1,TLR4,VAV3,VEGFB                                                                                                                                                                                                                                                                                                                 |

|    |                               |                                                                          |          |     |                                                                                                                                                                                                                                                                                                                                                                                                                                                                                                                                                                                                  |
|----|-------------------------------|--------------------------------------------------------------------------|----------|-----|--------------------------------------------------------------------------------------------------------------------------------------------------------------------------------------------------------------------------------------------------------------------------------------------------------------------------------------------------------------------------------------------------------------------------------------------------------------------------------------------------------------------------------------------------------------------------------------------------|
| 8  | Lymphoproliferative disorder  | Hematological Disease, Immunological Disease                             | 2.30E,14 | 102 | ALB,ALK,ALOX12,ANXA6,ARHGAP5,ARHGEF1,ATXN3,B2M,BCR,BTK,C1R,C8A,CD1A,CD74,CDK5R1,CIAO1,CLK1,CSDE1,CSF2RB,CSNK1G2,CSTF2,CTCF,DGKA,DPP4,ECHS1,ECI2,EP300,EPHA3,ERBB4,F2,F3,FAP,FAS,FCGR2A,FHIT, FN1,GAD2,GART,GGPS1,GRHPR,GRK2,GTF2F2,GTF2I,HASPIN,HAT1,HCK,HDAC7,HLA,DRB1,HMOX1,HNRNPA2B1,HSP90AB1,IFNG,IGF1R,IMPDH1,IQUB,ITGB3,ITPK1,LRBA,MAGI2,MARK1,MMP1,MMP2,MUC1,NAE1,NCBP1,NCOA3,NDC80,NFATC1,NOTCH1,NT5C3A,NUP214,ODC1,PC,PGC,PGK1,POT1,POU2F1,PRKCB,PTK2B,PTPRE,PTPRF,PYGL,RAC1,RARA,RARG,RRM1,SEM1,SH2B2,SLC5A1,SMG5,SNX1,SYT13,TAF13,THBS2,TJP1,TLR4,TXNDC12,VAV3,XIAP,XRCC6,ZEB2,ZNF292 |
| 9  | Apoptosis of tumor cell lines | Cell Death and Survival                                                  | 2.70E,14 | 70  | ACVR2B,ALB,ALK,ALOX12,AR,B2M,BTK,BTRC,CD74,CDK5R1,CHKA,CSF2RB,CTCF,CYP2E1,DAPK2,DFFA,DPP4,DSG2,DTYMK,EP300,ERBB4,ESR1,FAP,FAS,FHIT,FLNB, FN1,G6PD,GALNT10,GRK2,HAT1,HBEGF,HCK,HK2,HMOX1,HSP90AB1,IDE,IFNG,IGF1R,ITGB3,ITPK1,KIF11,MSH2,MSN,MUC1,NCOA3,NDC80,NOTCH1,PA2G4,PDHA1,PEX5,POT1,PPARG,PRKCB,PTK2B,PUS10,RAC1,RARG,RBBP6,RRM1,S100A6,SFN,SMURF2,SNX1,STK4,TLR4,WEE1,XIAP,XRCC6,YY1                                                                                                                                                                                                       |
| 10 | Breast adenocarcinoma         | Cancer, Organismal Injury and Abnormalities, Reproductive System Disease | 2.93E,14 | 55  | ACACB,AR,BTK,CAMK4,CSNK1G1,CTCF,DAPK2,DPP4,EP300,EPHA3,ERBB4,ESR1,FAP,FLNB, FN1,GGPS1,GRK2,GRK6,HDAC7,HSP90AB1,IGF1R,ITPK1,KIF11,KMT5A,MAPK6,MARK1,MMP2,MSH2,MSN,NCOA3,NDC80,NF2,NFATC1,NOTCH1,OXSR1,PARP3,PDK3,PDK4,PHF24,POU2F1,PPP2R1A,PRKCB,PTPRE,PTPRF,RAC1,RARA,RBBP6,RBM39,RRM1,SENP2,SLK,SMURF2,TLR4,VAV3,ZEB2                                                                                                                                                                                                                                                                           |
| 11 | Lymphoma                      | Cancer, Hematological Disease, Organismal Injury and Abnormalities       | 3.30E,14 | 72  | ALK,ANXA6,ARHGEF1,ATXN3,B2M,BCR,BTK,C1R,CD1A,CLK1,CSDE1,CSF2RB,CSNK1G2,CSTF2,CTCF,DGKA,DPP4,ECI2,EP300,EPHA3,ERBB4,FAP,FAS,FCGR2A,FHIT, FN1,GAD2,GART,GGPS1,GTF2I,HAT1,HCK,HDAC7,HMOX1,HNRNPA2B1,HSP90AB1,IFNG,IMPDH1,IQUB,ITGB3,MMP1,MMP2,MUC1,NCBP1,NFATC1,NOTCH1,NT5C3A,NUP214,ODC1,PC,PGK1,POT1,POU2F1,PRKCB,PTK2B,PTPRE,PTPRF,RAC1,RARA,RARG,RRM1,SEM1,SLC5A1,SNX1,THBS2,TJP1,TLR4,TXNDC12,VAV3,XIAP,XRCC6,ZNF292                                                                                                                                                                           |
| 12 | Lymphocytic cancer            | Cancer, Hematological Disease, Organismal Injury and Abnormalities       | 5.17E,14 | 101 | ALB,ALK,ALOX12,ANXA6,ARHGAP5,ARHGEF1,ATXN3,B2M,BCR,BTK,C1R,C8A,CD1A,CD74,CDK5R1,CIAO1,CLK1,CSDE1,CSF2RB,CSNK1G2,CSTF2,CTCF,DGKA,DPP4,ECHS1,ECI2,EP300,EPHA3,ERBB4,F2,F3,FAP,FAS,FCGR2A,FHIT, FN1,GAD2,GART,GGPS1,GRHPR,GRK2,GTF2F2,GTF2I,HASPIN,HAT1,HCK,HDAC7,HLA,DRB1,HMOX1,HNRNPA2B1,HSP90AB1,IFNG,IMPDH1,IQUB,ITGB3,ITPK1,LRBA,MAGI2,MARK1,MMP1,MMP2,MUC1,NAE1,NCBP1,NCOA3,NDC80,NFATC1,NOTCH1,NT5C3A,NUP214,ODC1,PC,PGC,PGK1,POT1,POU2F1,PRKCB,PTK2B,PTPRE,PTPRF,PYGL,RAC1,RARA,RARG,RRM1,SEM1,SH2B2,SLC5A1,SMG5,SNX1,SYT13,TAF13,THBS2,TJP1,TLR4,TXNDC12,VAV3,XIAP,XRCC6,ZEB2,ZNF292       |
| 13 | Advanced malignant tumor      | Cancer, Organismal Injury and Abnormalities                              | 5.18E,14 | 53  | ALB,ALK,AOC3,AR,B2M,BCR,BTK,C1R,CD74,CSF2RB,CYP17A1,DPP4,DSG2,EP300,EPHA3,ERBB4,ESR1,F2,F3,FAS,FCGR2A, FN1,GAD2,GART,GGPS1,HCK,HLA,DRB1,HMOX1,HSP90AB1,HTR1A,IFNG,IGF1R,IMPDH1,MMP1,MMP2,MSH2,MUC1,NF2,NOTCH1,NR1I3,PARP3,PGC,PPP2R1A,PTK2B,RAC1,RARA,RARG,RRM1,SH2B2,SKP1,TLR4,VAV3,VEGFB                                                                                                                                                                                                                                                                                                       |
| 14 | Lymphocytic neoplasm          | Cancer, Hematological Disease, Organismal Injury and Abnormalities       | 5.56E,14 | 101 | ALB,ALK,ALOX12,ANXA6,ARHGAP5,ARHGEF1,ATXN3,B2M,BCR,BTK,C1R,C8A,CD1A,CD74,CDK5R1,CIAO1,CLK1,CSDE1,CSF2RB,CSNK1G2,CSTF2,CTCF,DGKA,DPP4,ECHS1,ECI2,EP300,EPHA3,ERBB4,F2,F3,FAP,FAS,FCGR2A,FHIT, FN1,GAD2,GART,GGPS1,GRHPR,GRK2,GTF2F2,GTF2I,HASPIN,HAT1,HCK,HDAC7,HLA,DRB1,HMOX1,HNRNPA2B1,HSP90AB1,IFNG,IMPDH1,IQUB,ITGB3,ITPK1,LRBA,MAGI2,MARK1,MMP1,MMP2,MUC1,NAE1,NCBP1,NCOA3,NDC80,NFATC1,NOTCH1,NT5C3A,NUP214,ODC1,PC,PGC,PGK1,POT1,POU2F1,PRKCB,PTK2B,PTPRE,PTPRF,PYGL,RAC1,RARA,RARG,RRM1,SEM1,SH2B2,SLC5A1,SMG5,SNX1,SYT13,TAF13,THBS2,TJP1,TLR4,TXNDC12,VAV3,XIAP,XRCC6,ZEB2,ZNF292       |
| 15 | Hematologic cancer of cells   | Cancer, Hematological Disease, Organismal Injury and Abnormalities       | 5.71E,14 | 94  | ALB,ALK,ALOX12,ANXA6,ARHGAP5,ARHGEF1,ATXN3,B2M,BCR,BTK,C1R,C8A,CD1A,CD74,CDK5R1,CIAO1,CLK1,CSDE1,CSF2RB,CSNK1G2,CSTF2,CTCF,DGKA,DPP4,ECI2,EP300,EPHA3,ERBB4,F2,F3,FAP,FAS,FCGR2A,FHIT, FN1,GAD2,GART,GGPS1,GRK2,GTF2F2,GTF2I,HASPIN,HAT1,HCK,HDAC7,HMOX1,HNRNPA2B1,HSP90AB1,IFNG,IMPDH1,IQUB,ITGB3,LRBA,MAGI2,MMP1,MMP2,MUC1,NCBP1,NCOA3,NFATC1,NOTCH1,NT5C3A,NUP214,ODC1,PC,PGC,PGK1,POT1,POU2F1,PRKCB,PTK2B,PTPRE,PTPRF,PYGL,RAC1,RARA,RARG,RRM1,SEM1,SH2B2,SLC5A1,SMG5,SNX1,SYT13,TAF13,THBS2,TJP1,TLR4,TXNDC12,VAV3,XIAP,XRCC6,ZEB2,ZNF292                                                   |
| 16 | Neoplasia of leukocytes       | Cancer, Hematological Disease, Immunological                             | 5.76E,14 | 99  | ALB,ALK,ALOX12,ANXA6,ARHGAP5,ARHGEF1,ATXN3,B2M,BCR,BTK,C1R,C8A,CD1A,CD74,CDK5R1,CIAO1,CLK1,CSDE1,CSF2RB,CSNK1G2,CSTF2,CTCF,DGKA,DPP4,ECI2,EP300,EPHA3,ERBB4,F2,F3,FAP,FAS,FCGR2A,FHIT, FN1,GAD2,GART,GGPS1,GRHPR,GRK2,GTF2F2,GTF2I,HASPIN,HAT1,HCK,HDAC7,HLA,DR                                                                                                                                                                                                                                                                                                                                  |



|    |                              |                                                                    |           |     |                                                                                                                                                                                                                                                                                                                                                                                                                                                                                                                                                                                                                                                                                                                                                                                                                                                                                        |
|----|------------------------------|--------------------------------------------------------------------|-----------|-----|----------------------------------------------------------------------------------------------------------------------------------------------------------------------------------------------------------------------------------------------------------------------------------------------------------------------------------------------------------------------------------------------------------------------------------------------------------------------------------------------------------------------------------------------------------------------------------------------------------------------------------------------------------------------------------------------------------------------------------------------------------------------------------------------------------------------------------------------------------------------------------------|
|    |                              | Disease, Organismal Injury and Abnormalities                       |           |     | B1, HMOX1, HNRNPA2B1, HSP90AB1, IFNG, IMPDH1, IQUB, ITGB3, ITPK1, LRBA, MAGI2, MMP1, MMP2, MUC1, NAE1, NCBP1, NCOA3, NDC80, NFATC1, NOTCH1, NT5C3A, NUP214, ODC1, PC, PGC, PGK1, POT1, POU2F1, PRKCB, PTK2B, PTPRE, PTPRF, PYGL, RAC1, RARA, RARG, RRM1, SEM1, SH2B2, SLC5A1, SMG5, SNX1, SYT13, TAF13, THBS2, TJP1, TLR4, TXNDC12, VAV3, XIAP, XRCC6, ZEB2, ZNF292                                                                                                                                                                                                                                                                                                                                                                                                                                                                                                                    |
| 17 | Tumorigenesis of lymphocytes | Cancer, Hematological Disease, Organismal Injury and Abnormalities | 5.98E, 14 | 96  | ALB, ALK, ALOX12, ANXA6, ARHGAP5, ARHGEF1, ATXN3, B2M, BCR, BTK, C1R, C8A, CD1A, CD74, CDK5R1, CIAO1, CLK1, CSDE1, CSF2RB, CSNK1G2, CSTF2, CTCF, DGKA, DPP4, ECI2, EP300, EPHA3, ERBB4, FAP, FAS, FCGR2A, FHIT, FN1, GAD2, GART, GGPS1, GRHPR, GRK2, GTF2F2, GTF2I, HASPIN, HAT1, HCK, HDAC7, HLA, DRB1, HMOX1, HNRNPA2B1, HSP90AB1, IFNG, IMPDH1, IQUB, ITGB3, ITPK1, LRBA, MAGI2, MMP1, MMP2, MUC1, NAE1, NCBP1, NDC80, NFATC1, NOTCH1, NT5C3A, NUP214, ODC1, PC, PGC, PGK1, POT1, POU2F1, PRKCB, PTK2B, PTPRE, PTPRF, PYGL, RAC1, RARA, RARG, RRM1, SEM1, SH2B2, SLC5A1, SMG5, SNX1, SYT13, TAF13, THBS2, TJP1, TLR4, TXNDC12, VAV3, XIAP, XRCC6, ZEB2, ZNF292                                                                                                                                                                                                                      |
| 18 | Viral Infection              | Infectious Diseases                                                | 1.49E, 13 | 84  | ACACB, ACADSB, ACP3, ADH1C, ADH7, ALB, ALOX12, ANXA6, AR, ARF6, B2M, BCR, BMP1, BPI, BTRC, C1R, C8A, CANT1, CD74, CLK1, CSF2RB, CTCF, CYP17A1, CYP2E1, DAPK2, DHPS, DPP4, DSG2, EP300, ESR1, ETF1, F2, F3, FAS, FCGR2A, FN1, G6PD, GGPS1, GRK2, GRK6, GTF2I, HBB, HCK, HIBCH, HLA, DRB1, HMGC1, IFNG, IFNGR1, IGF1R, IMPA2, IMPDH1, IQUB, ITGB3, KIF11, LARS1, MDH1, MSH2, NBEA, NCOA3, NF2, NFATC1, NMT1, NUP214, OXSR1, PANK1, PPARG, PRKCB, PTK2B, PYGL, RAC1, RARA, RARG, RND1, RRM1, SART3, SERPINA5, SF3B6, SUB1, TLR4, TRIM21, WWP1, XIAP, ZEB2, ZNF292                                                                                                                                                                                                                                                                                                                         |
| 19 | Non-Hodgkin lymphoma         | Cancer, Hematological Disease, Organismal Injury and Abnormalities | 2.81E, 13 | 67  | ALK, ANXA6, ARHGEF1, ATXN3, B2M, BCR, BTK, C1R, CD1A, CLK1, CSDE1, CSF2RB, CSTF2, CTCF, DGKA, DPP4, ECI2, EP300, EPHA3, ERBB4, FAS, FCGR2A, FHIT, FN1, GGPS1, GTF2I, HAT1, HCK, HDAC7, HMOX1, HNRNPA2B1, HSP90AB1, IFNG, IMPDH1, IQUB, ITGB3, MMP1, MMP2, MUC1, NCBP1, NFATC1, NOTCH1, NT5C3A, ODC1, PC, PGK1, POT1, POU2F1, PRKCB, PTK2B, PTPRE, PTPRF, RAC1, RARA, RARG, RRM1, SEM1, SLC5A1, SNX1, THBS2, TJP1, TLR4, TXNDC12, VAV3, XIAP, XRCC6, ZNF292                                                                                                                                                                                                                                                                                                                                                                                                                             |
| 20 | Myeloid or lymphoid neoplasm | Cancer, Hematological Disease, Organismal Injury and Abnormalities | 3.58E, 13 | 126 | ALB, ALK, ALOX12, AMY1C (includes others), ANXA6, APEX1, ARHGAP5, ARHGEF1, ATXN3, B2M, BCR, BMP1, BTK, BTRC, C1R, C8A, CANT1, CD1A, CD74, CDK5R1, CIAO1, CLK1, CSDE1, CSF2RB, CSNK1G2, CSTF2, CTCF, CYP2E1, CYP2R1, DGKA, DPP4, ECHS1, ECI2, EP300, EPHA3, ERBB4, ESR1, ETF1, F2, F3, FAP, FAS, FCGR2A, FHIT, FN1, GAD2, GART, GGPS1, GRHPR, GRK2, GTF2F2, GTF2I, HASPIN, HAT1, HCK, HDAC7, HLA, DRB1, HMGB3, HMOX1, HNRNPA2B1, HSP90AB1, IFNG, IGF1R, IMPDH1, IQUB, ITGB3, ITPK1, KLK1, KMT5A, LRBA, MAGEA4, MAGI2, MARK1, MMP1, MMP2, MSH2, MUC1, NAE1, NCBP1, NCOA3, NDC80, NFATC1, NOTCH1, NT5C3A, NUP214, ODC1, PA2G4, PC, PDHA1, PDK3, PDK4, PGC, PGK1, POT1, POU2F1, PRKCB, PTK2B, PTPRE, PTPRF, PYGL, RAC1, RARA, RARG, RRM1, SEM1, SH2B2, SLC5A1, SMG5, SMG7, SMTN, SNX1, STK4, SYT13, TAF13, THBS2, TJP1, TLR4, TXNDC12, UEVLD, VAV3, VEGFB, WEE1, XIAP, XRCC6, ZEB2, ZNF292 |
| 21 | Neoplasia of blood cells     | Cancer, Hematological Disease, Organismal Injury and Abnormalities | 4.88E, 13 | 124 | ALB, ALK, ALOX12, AMY1C (includes others), ANXA6, APEX1, ARHGAP5, ARHGEF1, ATXN3, B2M, BCR, BMP1, BTK, BTRC, C1R, C8A, CANT1, CD1A, CD74, CDK5R1, CIAO1, CLK1, CSDE1, CSF2RB, CSNK1G2, CSTF2, CTCF, CYP2E1, CYP2R1, DGKA, DPP4, ECI2, EP300, EPHA3, ERBB4, ESR1, ETF1, F2, F3, FAP, FAS, FCGR2A, FHIT, FN1, GAD2, GART, GGPS1, GRHPR, GRK2, GTF2F2, GTF2I, HASPIN, HAT1, HCK, HDAC7, HLA, DRB1, HMGB3, HMOX1, HNRNPA2B1, HSP90AB1, IFNG, IGF1R, IMPDH1, IQUB, ITGB3, ITPK1, KLK1, KMT5A, LRBA, MAGEA4, MAGI2, MMP1, MMP2, MSH2, MUC1, NAE1, NCBP1, NCOA3, NDC80, NFATC1, NOTCH1, NT5C3A, NUP214, ODC1, PA2G4, PC, PDHA1, PDK3, PDK4, PGC, PGK1, POT1, POU2F1, PRKCB, PTK2B, PTPRE, PTPRF, PYGL, RAC1, RARA, RARG, RRM1, SEM1, SH2B2, SLC5A1, SMG5, SMG7, SMTN, SNX1, STK4, SYT13, TAF13, THBS2, TJP1, TLR4, TXNDC12, UEVLD, VAV3, VEGFB, WEE1, XIAP, XRCC6, ZEB2, ZNF292               |
| 22 | Cell viability               | Cell Death and Survival                                            | 9.55E, 13 | 65  | ACVR2B, ALB, ALK, ALOX12, APEX1, AR, ARF6, ATP7B, BCR, BTK, BTRC, CAMK4, CD74, CHKA, DGKA, DOK2, DPP4, DTYMK, EP300, ERBB4, ESR1, F2, FAS, FHIT, FN1, GRK2, GRK6, HBB, HBEGF, HCK, HK2, HMGC1, HMOX1, HSP90AB1, IFNG, IGF1R, ITGB3, KIF11, MSH2, NAE1, NDC80, NME3, NOTCH1, NT5C3A, PDHA1, PPARG, PPP2R1A, PRKCB, PTK2B, PTPRE, RAC1, RBM39, RRM1, RUVBL1, S100A6, SEM1, SEMA4D, SFN, SKP1, THBS2, TLR4, TRIM21, WEE1, XIAP, XRCC6                                                                                                                                                                                                                                                                                                                                                                                                                                                     |
| 23 | Cell survival                | Cell Death and Survival                                            | 1.07E, 12 | 66  | ACVR2B, ALB, ALK, ALOX12, APEX1, AR, ARF6, ATP7B, BCR, BTK, BTRC, CAMK4, CD74, CHKA, CSF2RB, DGKA, DOK2, DPP4, DTYMK, EP300, ERBB4, ESR1, F2, FAS, FHIT, FN1, GRK2, GRK6, HBB, HBEGF, HCK, HK2, HMGC1, H                                                                                                                                                                                                                                                                                                                                                                                                                                                                                                                                                                                                                                                                               |

|    |                                        |                                                                                                                       |          |     |                                                                                                                                                                                                                                                                                                                                                                                                                                                                                                                                                                                                                                                                                                                                                                                                                                                                                                                                                                                                                                                                                                                                                                                                                                                                                                                                                                                                                                                                                                                                                      |
|----|----------------------------------------|-----------------------------------------------------------------------------------------------------------------------|----------|-----|------------------------------------------------------------------------------------------------------------------------------------------------------------------------------------------------------------------------------------------------------------------------------------------------------------------------------------------------------------------------------------------------------------------------------------------------------------------------------------------------------------------------------------------------------------------------------------------------------------------------------------------------------------------------------------------------------------------------------------------------------------------------------------------------------------------------------------------------------------------------------------------------------------------------------------------------------------------------------------------------------------------------------------------------------------------------------------------------------------------------------------------------------------------------------------------------------------------------------------------------------------------------------------------------------------------------------------------------------------------------------------------------------------------------------------------------------------------------------------------------------------------------------------------------------|
|    |                                        |                                                                                                                       |          |     | MOX1,HSP90AB1,IFNG,IGF1R,ITGB3,KIF11,MSH2,NAE1,NDC80,NME3,NOTCH1,NT5C3A,PDHA1,PPARG,PP2R1A,PRKCB,PTK2B,PTPRE,RAC1,RBM39,RRM1,RUVBL1,S100A6,SEM1,SEMA4D,SFN,SKP1,THBS2,TLR4,TRIM21,WEE1,XIAP,XRCC6                                                                                                                                                                                                                                                                                                                                                                                                                                                                                                                                                                                                                                                                                                                                                                                                                                                                                                                                                                                                                                                                                                                                                                                                                                                                                                                                                    |
| 24 | Hematologic cancer                     | Cancer,Hematological Disease,Organismal Injury and Abnormalities                                                      | 1.11E,12 | 124 | ALB,ALK,ALOX12,AMY1C (includes others),ANXA6,APEX1,ARHGAP5,ARHGEF1,ATXN3,B2M,BCR,BTK,BTRC,C1R,C8A,CANT1,CD1A,CD74,CDK5R1,CIAO1,CLK1,CSDE1,CSF2RB,CSNK1G2,CSTF2,CTCF,CYP2E1,CYP2R1,DGKA,DPP4,ECHS1,ECI2,EP300,EPHA3,ERBB4,ESR1,ETF1,F2,F3,FAP,FAS,FCGR2A,FHIT,FN1,GAD2,GART,GGPS1,GRHPR,GRK2,GTF2F2,GTF2I,HASPIN,HAT1,HCK,HDAC7,HLA,DRB1,HMOX1,HNRNPA2B1,HSP90AB1,IFNG,IGF1R,IMPDH1,IQUB,ITGB3,ITPK1,KLK1,KMT5A,LRBA,MAGEA4,MAGI2,MARK1,MMP1,MMP2,MSH2,MUC1,NAE1,NCBP1,NCOA3,NDC80,NFATC1,NOTCH1,NT5C3A,NUP214,ODC1,PA2G4,PC,PDHA1,PK3,PK4,PGC,PGK1,POT1,POU2F1,PRKCB,PTK2B,PTPRE,PTPRF,PYGL,RAC1,RARA,RARG,RRM1,SEM1,SH2B2,SLC5A1,SMG5,SMG7,SMTN,SNX1,STK4,SYT13,TAF13,THBS2,TJP1,TLR4,TXNDC12,UEVLD,VAV3,VEGFB,WEE1,XIAP,XRCC6,ZEB2,ZNF292                                                                                                                                                                                                                                                                                                                                                                                                                                                                                                                                                                                                                                                                                                                                                                                                          |
| 25 | Phosphorylation of protein             | Post,Translational Modification                                                                                       | 1.35E,12 | 34  | ALK,ANG,AR,BCR,BTK,CAMK4,CD74,CSNK1G2,DAPK2,ERBB4,F2,FAS,FCGR2A,FN1,HASPIN,HCK,HLA,DRB1,IFNG,IGF1R,ITGB3,MAP3K3,MARK1,MATK,OXSR1,PRKCB,PSAP,PTK2B,RAC1,RARA,SEMA4D,SLK,STK16,STK4,WARS1                                                                                                                                                                                                                                                                                                                                                                                                                                                                                                                                                                                                                                                                                                                                                                                                                                                                                                                                                                                                                                                                                                                                                                                                                                                                                                                                                              |
| 26 | Cell proliferation of tumor cell lines | Cellular Development,Cellular Growth and Proliferation                                                                | 1.91E,12 | 85  | AASDHPPT,ACP3,ALK,ANG,ANXA6,APEX1,AR,BTK,CD74,CDK5R1,CHKA,CSF2RB,CSTF2,CTCF,DAPK2,DOK2,DPP4,DSG2,DTYMK,ECHS1,EP300,ERBB4,ESR1,F2,F3,FAS,FHIT,FN1,G6PD,GALNT10,HASPIN,HAT1,HBEGF,HCK,HK2,HMGCS1,HMOX1,HNRNPA2B1,IDE,IFNG,IGF1R,ITGB3,MAPK6,MATK,MEMO1,MMP1,MMP2,MTAP,MUC1,NCOA3,NF2,NFATC1,NOTCH1,NT5C3A,PA2G4,PC,PDK4,PGK1,PPARG,PPP2R1A,PRKCB,PTK2B,PTPRE,PTPRF,RAC1,RARA,RARG,RBBP6,RRM1,S100A6,SEMA4D,SFN,SMURF2,SNX1,STARD13,STK4,TLR4,TRIM21,UTRN,VAV3,XIAP,XRCC6,YWHAQ,YY1,ZEB2                                                                                                                                                                                                                                                                                                                                                                                                                                                                                                                                                                                                                                                                                                                                                                                                                                                                                                                                                                                                                                                                |
| 27 | Metastasis                             | Cancer,Organismal Injury and Abnormalities                                                                            | 1.97E,12 | 46  | ALB,ALK,AOC3,AR,B2M,BTK,C1R,CSF2RB,CYP17A1,DSG2,EP300,EPHA3,ERBB4,ESR1,F2,F3,FAS,FCGR2A,FN1,GAD2,GART,GGPS1,HLADRB1,HMOX1,HSP90AB1,HTR1A,IGF1R,IMPDH1,MMP1,MMP2,MSH2,MUC1,NF2,NOTCH1,NR1I3,PARP3,PGC,PPP2R1A,PTK2B,RAC1,RARA,RARG,RRM1,SH2B2,TLR4,VEGFB                                                                                                                                                                                                                                                                                                                                                                                                                                                                                                                                                                                                                                                                                                                                                                                                                                                                                                                                                                                                                                                                                                                                                                                                                                                                                              |
| 28 | Head and neck cancer                   | Cancer,Organismal Injury and Abnormalities                                                                            | 1.99E,12 | 256 | AASDHPPT,ACACB,ACADSB,ACADVL,ACAT2,ACBD7,ACVR2B,ACY1,ADH7,ALB,ALK,ALOX12,AMY1C (includes others),ANXA6,AOC3,APEX1,APPL1,AR,ARF6,ARHGAP5,ARHGEF1,ASAP1,ATP7B,ATXN3,B2M,B3GAT2,B3GAT3,BCR,BMP1,BPI,BTK,BTRC,C1R,C8A,CA8,CANT1,CD1A,CD74,CHKA,CIAO1,CLCN5,CLK1,CRYM,CSDE1,CSF2RB,CSNK1G1,CSNK1G2,CSTF2,CTCF,CUL1,CYP17A1,CYP2E1,CYP2R1,CYP7A1,DAPK2,DCTD,DCXR,DDFA,DGKA,DHPS,DMC1,DOK2,DPP4,DSG2,DTYMK,EP300,EPHA3,EPS8L2,ERBB4,ERI1,ESR1,ETF1,F2,F3,FAP,FAS,FCGR2A,FHIT,FLNB,FN1,G6PD,GAD2,GALM,GALNT10,GART,GC,GRHPR,GRK2,GRK6,GSTT2/GSTT2B,GTF2F2,GTF2I,HADH,HASPIN,HAT1,HBEGF,HCK,HDAC7,HDX,HIBCH,HK2,HLADRB1,HMBOX1,HMGB3,HMGCS1,HMOX1,HNRNPA2B1,HPD,HSCB,HSD17B4,HSP90AB1,HTR1A,IDE,IFNGR1,IGF1R,IMPA2,IMPDH1,IQUB,ITGB3,ITPK1,ITPKC,ITSN1,KIF11,KLK1,KMT5A,KYNU,LRBA,MAGEA4,MAGI2,MAP3K3,MAPK6,MARF1,MARK1,MATK,MECR,MEMO1,MMP1,MMP2,MSH2,MSN,MTAP,MUC1,MYBPC1,MYBPC3,MYSM1,NAE1,NBEA,NCBP1,NCOA3,NDC80,NDUFAB1,NF2,NFATC1,NME3,NMRK1,NOTCH1,NR1I3,NT5C3A,NUP214,OAT,ODC1,OXSR1,PA2G4,PAFAH1B2,PAH,PANK1,PAPSS1,PARN,PARP3,PATJ,PC,PCYT2,PDF,PDHA1,PDK2,PDK3,PDK4,PEX5,PGK1,PHF24,PIP4K2C,PNMT,POT1,POU2F1,PPARG,PPP2R1A,PRKCB,PSAP,PTK2B,PTPRE,PTPRF,PYGL,RAB26,RAC1,RARA,RARG,RBBP6,RBM39,RGS6,RND1,RPA3,RRM1,RTN4IP1,RUVBL1,SART3,SEC23A,SEM1,SEMA4D,SENP2,SERPINA5,SFMBT2,SFN,SH2B2,SH3YL1,SKP1,SLC5A1,SLK,SMAP1,SMG5,SMG7,SMTN,SMURF2,SNX1,SNX22,SPEF1,STARD13,STK4,SUB1,SULT1A1,SYT13,TAF13,THBS2,TIMM9,TJP1,TLR4,TRIM21,TTR,UEVLD,USP19,UTRN,VAV3,VEGFB,VPS26A,WEE1,WHRN,WWP1,XRCC6,YWHAQ,YY1,ZBTB43,ZCWPW1,ZEB2,ZFP28,ZIC3,ZNF292,ZNF462 |
| 29 | Dermatitis                             | Dermatological Diseases and Conditions,Inflammatory Disease,Inflammatory Response,Organismal Injury and Abnormalities | 1.99E,12 | 29  | ACADVL,CD1A,CD74,CSF2RB,CYP17A1,DHPS,DPP4,GRK2,HBB,HCK,HLA,DRB1,HTR1A,IDE,IFNG,KLK1,MMP1,MSN,ODC1,PDK4,PPARG,PRKCB,PSAP,RARA,RARG,RRM1,RUVBL1,SFN,TLR4,XRCC6                                                                                                                                                                                                                                                                                                                                                                                                                                                                                                                                                                                                                                                                                                                                                                                                                                                                                                                                                                                                                                                                                                                                                                                                                                                                                                                                                                                         |

|    |                                |                                                                                        |          |     |                                                                                                                                                                                                                                                                                                                                                                                                                                                                                                                                                                                                                                                                                                                                                                                                                                                                                                                                                                                                                                                                                                                                                                                                                                                                                                                                                                                                                                                                                   |
|----|--------------------------------|----------------------------------------------------------------------------------------|----------|-----|-----------------------------------------------------------------------------------------------------------------------------------------------------------------------------------------------------------------------------------------------------------------------------------------------------------------------------------------------------------------------------------------------------------------------------------------------------------------------------------------------------------------------------------------------------------------------------------------------------------------------------------------------------------------------------------------------------------------------------------------------------------------------------------------------------------------------------------------------------------------------------------------------------------------------------------------------------------------------------------------------------------------------------------------------------------------------------------------------------------------------------------------------------------------------------------------------------------------------------------------------------------------------------------------------------------------------------------------------------------------------------------------------------------------------------------------------------------------------------------|
| 30 | Inflammation of organ          | Inflammatory Response, Organismal Injury and Abnormalities                             | 2.00E,12 | 51  | ACADVL,ALB,ALK,ALOX12,AR,CD1A,CD74,CSF2RB,CYP17A1,CYP2E1,DHPS,DPP4,EP300,ESR1,F2,F3,FAS,FCGR2A,FN1,GAD2,GC,GRK2,HBB,HCK,HLADRB1,HTR1A,IDE,IFNG,IFNGR1,IGF1R,IMPDH1,ITGB3,KLK1,MMP1,MSN,MUC1,ODC1,PKD4,PPARG,PRKCB,PSAP,RAC1,RARA,RARG,RRM1,RUVBL1,SFN,SMURF2,TAF13,TLR4,XRCC6                                                                                                                                                                                                                                                                                                                                                                                                                                                                                                                                                                                                                                                                                                                                                                                                                                                                                                                                                                                                                                                                                                                                                                                                     |
| 31 | Advanced malignant solid tumor | Cancer, Organismal Injury and Abnormalities                                            | 2.27E,12 | 45  | ALB,ALK,AOC3,AR,B2M,BCR,BTK,C1R,CSF2RB,CYP17A1,DPP4,DSG2,EP300,EPAH3,ERBB4,ESR1,F2,F3,FAS,FCGR2A,FN1,GAD2,GART,GGPS1,HMOX1,HSP90AB1,IGF1R,IMPDH1,MMP2,MSH2,MUC1,NF2,NOTCH1,NR1I3,PARP3,PGC,PPP2R1A,PTK2B,RAC1,RARA,RARG,RRM1,SKP1,VAV3,VEGFB                                                                                                                                                                                                                                                                                                                                                                                                                                                                                                                                                                                                                                                                                                                                                                                                                                                                                                                                                                                                                                                                                                                                                                                                                                      |
| 32 | Cell death of tumor cells      | Cancer, Cell Death and Survival, Organismal Injury and Abnormalities, Tumor Morphology | 2.98E,12 | 22  | ALB,AR,ATP7B,B2M,BTK,CD74,F2,FAS,FHIT,GRK6,HBEGF,HMOX1,IFNG,IGF1R,MUC1,NCOA3,NOTCH1,PPARG,PTK2B,RAC1,RARA,XIAP                                                                                                                                                                                                                                                                                                                                                                                                                                                                                                                                                                                                                                                                                                                                                                                                                                                                                                                                                                                                                                                                                                                                                                                                                                                                                                                                                                    |
| 33 | Invasive tumor                 | Cancer, Organismal Injury and Abnormalities                                            | 3.55E,12 | 54  | ALB,ALK,AOC3,AR,B2M,BTK,C1R,CSF2RB,CYP17A1,DSG2,EP300,EPAH3,ERBB4,ESR1,F2,F3,FAP,FAS,FCGR2A,FN1,GAD2,GART,GGPS1,HLA,DRB1,HMOX1,HSP90AB1,HTR1A,IGF1R,IMPDH1,MMP1,MMP2,MSH2,MUC1,MYBPC3,NF2,NOTCH1,NR1I3,PARP3,PKD4,PGC,PPP2R1A,PTK2B,PTPRE,PTPRF,RAC1,RARA,RARG,RBM39,RRM1,SH2B2,THBS2,TLR4,VEGFB,YWHAQ                                                                                                                                                                                                                                                                                                                                                                                                                                                                                                                                                                                                                                                                                                                                                                                                                                                                                                                                                                                                                                                                                                                                                                            |
| 34 | Mature lymphocytic neoplasm    | Cancer, Hematological Disease, Organismal Injury and Abnormalities                     | 3.94E,12 | 79  | ALK,ALOX12,ANXA6,ARHGFE1,ATXN3,B2M,BCR,BTK,C1R,CD1A,CD74,CLK1,CSDE1,CSF2RB,CSTF2,CTCF,DGKA,DPP4,ECI2,EP300,EPAH3,ERBB4,FAS,FCGR2A,FHIT,FN1,GAD2,GART,GGPS1,GRHPR,GT2F2,GTF2I,HAT1,HCK,HDAC7,HLA,DRB1,HMOX1,HNRNPA2B1,HSP90AB1,IFNG,IMPDH1,IQUB,ITGB3,ITPK1,MAGI2,MMP1,MMP2,MUC1,NAE1,NCBP1,NDC80,NFATC1,NOTCH1,NT5C3A,ODC1,PC,PGK1,POT1,POU2F1,PRKCB,PTK2B,PTPRE,PTPRF,RAC1,RARA,RARG,RRM1,SEM1,SLC5A1,SNX1,TAF13,THBS2,TJP1,TLR4,TXNDC12,VAV3,XIAP,XRCC6,ZNF292                                                                                                                                                                                                                                                                                                                                                                                                                                                                                                                                                                                                                                                                                                                                                                                                                                                                                                                                                                                                                  |
| 35 | Neck neoplasm                  | Cancer, Organismal Injury and Abnormalities                                            | 4.43E,12 | 243 | AASDHPPT,ACACB,ACADSB,ACADVL,ACAT2,ACBD7,ACVR2B,ACY1,ADH7,ALB,ALK,ALOX12,AMY1C (includes others),ANXA6,AOC3,APPL1,AR,ARHGAP5,ARHGFE1,ASAP1,ATP7B,ATXN3,B3GAT2,B3GAT3,BCR,BMP1,BPI,BTK,BTRC,C8A,CA8,CANT1,CD1A,CHKA,CIAO1,CLCN5,CLK1,CRYM,CSDE1,CSF2RB,CSNK1G1,CSNK1G2,CSTF2,CTCF,CUL1,CYP17A1,CYP2E1,CYP2R1,CYP7A1,DAPK2,DCTD,DCXR,DFFA,DGKA,DHPS,DMC1,DOK2,DPP4,DSG2,DTYMK,EP300,EPAH3,EP8L2,ERBB4,ERI1,ESR1,ETF1,F2,F3,FAP,FAS,FLNB,FN1,G6PD,GAD2,GALM,GALNT10,GART,GC,GRHPR,GRK2,GRK6,GSTT2/GSTT2B,GTF2F2,GTF2I,HADH,HASPIN,HAT1,HBEGF,HCK,HDAC7,HDX,HIBCH,HK2,HLADRB1,HMBOX1,HMGB3,HMGCS1,HMOX1,HNRNP A2B1,HPD,HSCB,HSD17B4,HSP90AB1,IDE,IFNGR1,IGF1R,IMPA2,IMPDH1,IQUB,ITGB3,ITPK1,ITPK1,ITSN1,KIF11,KLK1,KMT5A,KYNU,LRBA,MAGI2,MAP3K3,MAPK6,MARF1,MARK1,MATK,MECR,MEMO1,MMP1,MMP2,MSH2,MSN,MTAP,MUC1,MYBPC1,MYBPC3,MYSM1,NAE1,NBEA,NCBP1,NCOA3,NDC80,NDUFA B1,NF2,NFATC1,NME3,NMRK1,NOTCH1,NR1I3,NT5C3A,NUP214,OAT,ODC1,OXSR1,PA2G4,PAFAH1B2,PAH,PANK1,PAPSS1,PARN,PARP3,PATJ,PC,PCYT2,PDF,PDHA1,PKD2,PKD3,PKD4,PEX5,PGK1,PHF24,PIP4K2C,PNMT,POT1,POU2F1,PPARG,PPP2R1A,PRKCB,PSAP,PTK2B,PTPRE,PTPRF,PYGL,RAB26,RAC1,RARA,RARG,RBBP6,RBM39,RGS6,RND1,RPA3,RRM1,RTN4IP1,RUVBL1,SART3,SEC23A,SEM1,SEMA4D,SENP2,SER PINA5,SFMBT2,SH2B2,SH3YL1,SKP1,SLC5A1,SLK,SMAP1,SMG5,SMTN,SMURF2,SNX1,SNX2,SPEF1,STAR D13,STK4,SUB1,SULT1A1,SYT13,TAF13,THBS2,TJP1,TLR4,TRIM21,TTR,UEVLD,USP19,UTRN,VAV3,VPS 26A,WEE1,WHRN,WWP1,XRCC6,YWHAQ,YY1,ZBTB43,ZCWPW1,ZEB2,ZFP28,ZIC3,ZNF292,ZNF462 |
| 36 | Non-melanoma solid tumor       | Cancer, Organismal Injury and Abnormalities                                            | 4.52E,12 | 285 | AASDHPPT,ACACB,ACADSB,ACADVL,ACAT2,ACBD7,ACSM2A,ACVR2B,ACY1,ADH1C,ADH7,ALB,ALK,ALOX12,AMY1C (includes others),ANG,ANXA6,AOC3,APEX1,APPL1,AR,ARF6,ARHGAP5,ARHGFE1,ASAP1,ATP7B,ATXN3,B2M,B3GAT2,B3GAT3,BCR,BMP1,BPI,BTK,BTRC,C1R,C8A,CA8,CAMK4,CANT1,CD1A,CD74,CDK5R1,CERT1,CHKA,CIAO1,CLCN5,CLK1,CRYM,CSDE1,CSF2RB,CSNK1G1,CSNK1G2,CSTF2,CTCF,CUL1,CYP17A1,CYP2E1,CYP2R1,CYP7A1,DAPK2,DCTD,DCXR,DFFA,DGKA,DHPS,DMC1,DOK2,DPP4,DSG2,DTYMK,ECHS1,ECI2,EP300,EPAH3,EP8L2,ERBB4,ERI1,ESR1,ETF1,EXOSC9,F2,F3,FABP7,FAP,FAS,FCGR2A,FHIT,FLNB,FN1,G6PD,GAD2,GALM,GALNT10,GART,GC,GGPS1,GRHPR,GRK2,GRK6,GSTT2/GSTT2B,GTF2F2,GTF2I,HADH,HASPIN,HAT1,HBB,HBEGF,HCK,HDAC7,HDX,HIBCH,HLA,DRB1,HMBOX1,HMGB3,HMGCS1,HMOX1,HNRNPA2B1,HPD,HSCB,HSD17B10,HSD17B4,HSP90AB1,HTR1A,IDE,IFNG,IFNGR1,IGF1R,IMPA2,IMPDH1                                                                                                                                                                                                                                                                                                                                                                                                                                                                                                                                                                                                                                                                                  |

|    |                               |                                                                                        |          |     |                                                                                                                                                                                                                                                                                                                                                                                                                                                                                                                                                                                                                                                                                                                                                                                                                                                                                                                                                                                                                                                                                              |
|----|-------------------------------|----------------------------------------------------------------------------------------|----------|-----|----------------------------------------------------------------------------------------------------------------------------------------------------------------------------------------------------------------------------------------------------------------------------------------------------------------------------------------------------------------------------------------------------------------------------------------------------------------------------------------------------------------------------------------------------------------------------------------------------------------------------------------------------------------------------------------------------------------------------------------------------------------------------------------------------------------------------------------------------------------------------------------------------------------------------------------------------------------------------------------------------------------------------------------------------------------------------------------------|
|    |                               |                                                                                        |          |     | ,IQUB,ITGB3,ITPA,ITPK1,ITPKC,ITSN1,KIF11,CLK1,KMT5A,KYNU,LRBA,MAGEA4,MAGI2,MAP3K3,MAPK6,MARF1,MARK1,MATK,MDH1,MECR,MEMO1,MMP1,MMP2,MSH2,MSN,MTAP,MUC1,MYBPC1,MYBPC3,MYSM1,NAE1,NBEA,NCBP1,NCOA3,NDC80,NDUFAB1,NF2,NFATC1,NME3,NMRK1,NMT1,NOTCH1,NR1I3,NSUN5,NT5C3A,NUP214,OAT,ODC1,OXSR1,PA2G4,PAFAH1B2,PAH,PANK1,PAPSS1,PARN,PARP3,PATJ,PC,PCYT2,PDF,PDHA1,PDK2,PDK3,PDK4,PEX5,PGC,PGK1,PHF24,PIP4K2C,PNMT,POT1,POU2F1,PPARG,PPP2R1A,PRKCB,PSAP,PTK2B,PTPRE,PTPRF,PUS10,PYGL,RAB26,RAC1,RARA,RARG,RBBP6,RBM39,RBP5,RGS6,RND1,RPA3,RRM1,RTN4IP1,RUVBL1,S100A6,SART3,SEC23A,SEM1,SEMA4D,SEN2,SERPINA5,SF3B6,SFMBT2,SFN,SH2B2,SH3YL1,SKP1,SLC5A1,SLK,SMAP1,SMG5,SMG7,SMTN,SMURF2,SNX1,SNX22,SPEF1,STARD13,STK16,STK4,SUB1,SULT1A1,SYT13,TAF13,THBS2,TIMM9,TJP1,TLR4,TFNFAIP8L2,TRIM21,TTR,TXNDC12,UEVLD,USP19,UTRN,VAV3,VEGFB,VPS26A,WEE1,WHRN,WWP1,XIAP,XRCC6,YWHAH,YWHAQ,YY1,ZBTB43,ZCWPW1,ZEB2,ZFP28,ZIC3,ZNF292,ZNF462                                                                                                                                                                     |
| 37 | Neoplasia of cells            | Cancer,Organismal Injury and Abnormalities                                             | 4.70E,12 | 178 | ALB,ALK,ALOX12,AMY1C (includes others),ANG,ANXA6,AOC3,APEX1,AR,ARF6,ARHGAP5,ARHGEF1,ASAP1,ATXN3,B2M,BCR,BMP1,BPI,BTK,BTRC,CIR,C8A,CAMK4,CANT1,CD1A,CD74,CDK5R1,CERT1,CIAO1,CLK1,CSDE1,CSF2RB,CSNK1G1,CSNK1G2,CSTF2,CTCF,CUL1,CYP2E1,CYP2R1,CYP7A1,DGKA,DOK2,DPP4,DSG2,ECI2,EP300,EPHA3,EPS8L2,ERBB4,ESR1,ETF1,F2,F3,FAP,FAS,FCGR2A,FHIT,FN1,GAD2,GALM,GART,GGPS1,GRHPR,GRK2,GTF2F2,GTF2I,HASPIN,HAT1,HBB,HBEGF,HCK,HDAC7,HDX,HLA,DRB1,HMGB3,HMOX1,HNRNPA2B1,HSCB,HSP90AB1,HTR1A,IDE,IFNG,IFNGR1,IGF1R,IMPDH1,IQUB,ITGB3,ITPK1,ITPKC,CLK1,KMT5A,LRBA,MAGEA4,MAGI2,MAPK6,MATK,MDH1,MECR,MMP1,MMP2,MSH2,MSN,MTAP,MUC1,MYBPC1,NAE1,NCBP1,NCOA3,ND C80,NDUFAB1,NF2,NFATC1,NOTCH1,NT5C3A,NUP214,OAT,ODC1,OXSR1,PA2G4,PANK1,PARP3,PATJ,PC,PDHA1,PDK2,PDK3,PDK4,PGC,PGK1,POT1,POU2F1,PPARG,PPP2R1A,PRKCB,PSAP,PTK2B,PTPRE,PTPRF,PYGL,RAC1,RARA,RARG,RBBP6,RGS6,RRM1,SEM1,SEMA4D,SEN2,SERPINA5,SFMBT2,SFN,SH2B2,SLC5A1,SLK,SMG5,SMG7,SMTN,SNX1,STK4,SYT13,TAF13,THBS2,TJP1,TLR4,TTR,TXNDC12,UEVLD,VAV3,VEGFB,WEE1,WWP1,XIAP,XRCC6,ZEB2,ZFP28,ZIC3,ZNF292,ZNF462                                       |
| 38 | Development of adenocarcinoma | Cancer,Organismal Injury and Abnormalities                                             | 5.89E,12 | 186 | AASDHPPT,ACACB,ACADSB,ACBD7,ACY1,ADH1C,ADH7,ALB,ALK,ALOX12,AOC3,APPL1,AR,ARF6,ARHGEF1,ASAP1,ATP7B,ATXN3,B2M,B3GAT2,BCR,BTK,BTRC,C8A,CA8,CANT1,CD1A,CERT1,CLCN5,CLK1,CSDE1,CSF2RB,CSNK1G1,CSNK1G2,CSTF2,CTCF,CUL1,CYP17A1,CYP7A1,DCTD,DGKA,DOK2,DPP4,DTYMK,ECHS1,EP300,EPHA3,ERBB4,ESR1,ETF1,F2,F3,FAP,FCGR2A,FLNB,FN1,G6PD,GAD2,GART,GGPS1,GRHPR,GRK2,GRK6,GTF2I,HASPIN,HBB,HBEGF,HCK,HDX,HLA,DRB1,HMGB3,HNRNPA2B1,HPD,HS D17B4,HSP90AB1,HTR1A,IGF1R,IMPDH1,IQUB,ITGB3,ITPA,ITPKC,ITSN1,KIF11,CLK1,KYNU,LRBA,MAGEA4,MAGI2,MAP3K3,MAPK6,MARF1,MARK1,MATK,MDH1,MEMO1,MMP1,MMP2,MSH2,MSN,MUC1,MYBPC1,MYBPC3,MYSM1,NBEA,NCBP1,NCOA3,NDC80,NF2,NFATC1,NMRK1,NMT1,NOTCH1,NR1I3,NT5C3A,NUP214,OAT,ODC1,OXSR1,PAH,PANK1,PARN,PARP3,PATJ,PC,PDK3,PDK4,PGC,PGK1,PIP4K2C,POU2F1,PPARG,PPP2R1A,PRKCB,PTK2B,PTPRE,PTPRF,PYGL,RARA,RARG,RBBP6,RBM39,RBP5,RGS6,RND1,RRM1,RTN4IP1,RUVBL1,SART3,SEMA4D,SEN2,SERPINA5,SF3B6,SFMBT2,SFN,SH3YL1,SKP1,SLC5A1,SLK,SMG5,SMG7,SMTN,SMURF2,STK4,SUB1,SULT1A1,SYT13,THBS2,TJP1,TLR4,TRIM21,TTR,UEVLD,UTRN,VAV3,WHRN,WWP1,XIAP,YY1,ZCWPW1,ZEB2,ZFP28,ZIC3,ZNF292,ZNF462 |
| 39 | B <sub>2</sub> cell neoplasm  | Cancer,Hematological Disease,Immunological Disease,Organismal Injury and Abnormalities | 7.76E,12 | 83  | ALB,ALK,ALOX12,ANXA6,ARHGAP5,ARHGEF1,ATXN3,B2M,BCR,BTK,C8A,CD74,CDK5R1,CIAO1,CLK1,CSDE1,CSF2RB,CSTF2,CTCF,DGKA,DPP4,ECI2,EP300,EPHA3,ERBB4,FAS,FCGR2A,FN1,GAD2,GART,GGPS1,GRHPR,GRK2,GTF2F2,GTF2I,HASPIN,HAT1,HDAC7,HLA,DRB1,HMOX1,HSP90AB1,IFNG,IMPDH1,IQUB,ITGB3,ITPK1,LRBA,MAGI2,MMP2,MUC1,NAE1,NCBP1,NDC80,NFATC1,NOTCH1,NUP214,PC,PGC,PGK1,POT1,PRKCB,PTK2B,PTPRE,PTPRF,PYGL,RAC1,RARA,RRM1,SEM1,SH2B2,SLC5A1,SMG5,SNX1,SYT13,TAF13,THBS2,TLR4,TXNDC12,VAV3,XIAP,XRCC6,ZEB2,ZNF292                                                                                                                                                                                                                                                                                                                                                                                                                                                                                                                                                                                                      |
| 40 | B cell cancer                 | Cancer,Hematological Disease,Immunological Disease,Organismal Injury and Abnormalities | 8.06E,12 | 78  | ALB,ALK,ANXA6,ARHGAP5,ARHGEF1,ATXN3,B2M,BCR,BTK,C8A,CD74,CDK5R1,CIAO1,CLK1,CSDE1,CSF2RB,CSTF2,CTCF,DGKA,ECI2,EP300,EPHA3,ERBB4,FAS,FCGR2A,FN1,GART,GGPS1,GRHPR,GRK2,GTF2I,HASPIN,HAT1,HDAC7,HLA,DRB1,HMOX1,HSP90AB1,IFNG,IMPDH1,IQUB,ITGB3,ITPK1,LRBA,MMP2,MUC1,NAE1,NCBP1,NDC80,NFATC1,NOTCH1,NUP214,PC,PGC,PGK1,POT1,PRKCB,PTK2B,PTPRE,PTPRF,PYGL,RAC1,RARA,RRM1,SEM1,SH2B2,SLC5A1,SMG5,SNX1,SYT13,TAF13,THBS2,TLR4,TXNDC12,VAV3,XIAP,XRCC6,ZEB2,ZNF292                                                                                                                                                                                                                                                                                                                                                                                                                                                                                                                                                                                                                                    |

|    |                               |                                                                          |          |     |                                                                                                                                                                                                                                                                                                                                                                                                                                                                                                                                                                                                                                                                                                                                                                                                                                                                                                                                                                                                                                                                                                                                                                                                                                                                                                                                                                                                                                                                                                                                                     |
|----|-------------------------------|--------------------------------------------------------------------------|----------|-----|-----------------------------------------------------------------------------------------------------------------------------------------------------------------------------------------------------------------------------------------------------------------------------------------------------------------------------------------------------------------------------------------------------------------------------------------------------------------------------------------------------------------------------------------------------------------------------------------------------------------------------------------------------------------------------------------------------------------------------------------------------------------------------------------------------------------------------------------------------------------------------------------------------------------------------------------------------------------------------------------------------------------------------------------------------------------------------------------------------------------------------------------------------------------------------------------------------------------------------------------------------------------------------------------------------------------------------------------------------------------------------------------------------------------------------------------------------------------------------------------------------------------------------------------------------|
| 41 | Cancer of secretory structure | Cancer, Organismal Injury and Abnormalities                              | 1.07E,11 | 256 | AASDHPPT,ACACB,ACADSB,ACADVL,ACAT2,ACBD7,ACP3,ACVR2B,ACY1,ADH7,ALB,ALK,ALOX12,AMY1C (includes others),ANXA6,AOC3,APEX1,APPL1,AR,ARHGAP5,ARHGEF1,ASAP1,ATP7B,ATXN3,B2M,B3GAT2,B3GAT3,BCR,BMP1,BPI,BTK,BTRC,C1R,C8A,CA8,CANT1,CD1A,CD74,CDK5R1,CHKA,CIAO1,CLCN5,CLK1,CRYM,CSDE1,CSF2RB,CSNK1G1,CSNK1G2,CSTF2,CTCF,CUL1,CYP17A1,CYP2E1,CYP2R1,CYP7A1,DAPK2,DCTD,DCXR,DDFA,DGKA,DHPS,DMC1,DOK2,DPP4,DSG2,DTYMK,EP300,EPA3,EP300,ERBB4,ER11,ESR1,ETF1,F2,F3,FABP7,FAP,FAS,FLNB,FN1,G6PD,GAD2,GALM,GALNT10,GART,GC,GGPS1,GRHPR,GRK2,GRK6,GSTT2/GSTT2B,GTF2F2,GTF2I,HADH,HASPIN,HAT1,HBEGF,HCK,HDAC7,HDX,HIBCH,HK2,HLA,DRB1,HMBBOX1,HMGB3,HMGCS1,HMOX1,HNRNPA2B1,HPD,HSCB,HSD17B4,HSP90AB1,IDE,IFNG,IFNGR1,IGF1R,IMPA2,IMPDH1,IQUB,ITGB3,ITPK1,ITPKC,ITSN1,KIF11,KLK1,KMT5A,KYNU,LRBA,MAGI2,MAP3K3,MAPK6,MARF1,MARK1,MATK,MDH1,MECR,MEMO1,MMP1,MMP2,MSH2,MSN,MTAP,MUC1,MYBPC1,MYBPC3,MYSM1,NAE1,NBEA,NCBP1,NCOA3,NDC80,NDUFAB1,NF2,NFATC1,NME3,NMRK1,NOTCH1,NR1I3,NT5C3A,NUP214,OAT,ODC1,OXSR1,PA2G4,PAFAH1B2,PAH,PANK1,PAPSS1,PARN,PARP3,PATJ,PC,PCYT2,PDF,PDHA1,PDK3,PDK4,PEX5,PGK1,PHF24,PIP4K2C,PNMT,POT1,POU2F1,PPARG,PPP2R1A,PRKCB,PSAP,PTK2B,PTPRE,PTPRF,PYGL,RAB26,RAC1,RARA,RARG,RBBP6,RBM39,RGS6,RND1,RPA3,RRM1,RTN4IP1,RUVBL1,S100A6,SART3,SEC23A,SEM1,SEMA4D,SEN2,SERPINA5,SF3B6,SFMBT2,SFN,SH2B2,SH3YL1,SKP1,SLC5A1,SLK,SMAP1,SMG5,SMTN,SMURF2,SNX1,SNX22,SPEF1,STARD13,STK4,SUB1,SULT1A1,SYT13,TAF13,THBS2,TJP1,TLR4,TRIM21,TTR,UEVLD,USP19,UTRN,VAV3,VPS26A,WEE1,WHRN,WWP1,XIAP,XRCC6,YWHAQ,YY1,ZBTB43,ZCWPW1,ZEB2,ZFP28,ZIC3,ZNF292,ZNF462 |
| 42 | Thyroid cancer                | Cancer, Endocrine System Disorders, Organismal Injury and Abnormalities  | 1.13E,11 | 240 | AASDHPPT,ACACB,ACADSB,ACADVL,ACAT2,ACBD7,ACVR2B,ACY1,ADH7,ALK,ALOX12,AMY1C (includes others),ANXA6,AOC3,APPL1,AR,ARHGAP5,ARHGEF1,ASAP1,ATP7B,ATXN3,B3GAT2,B3GAT3,BCR,BMP1,BPI,BTK,BTRC,C8A,CA8,CANT1,CD1A,CHKA,CIAO1,CLCN5,CLK1,CRYM,CSDE1,CSF2RB,CSNK1G1,CSNK1G2,CSTF2,CTCF,CUL1,CYP17A1,CYP2E1,CYP2R1,CYP7A1,DAPK2,DCTD,DCXR,DDFA,DGKA,DHPS,DMC1,DOK2,DPP4,DSG2,DTYMK,EP300,EP300,EP300,ERBB4,ER11,ESR1,ETF1,F2,F3,FAP,FAS,FLNB,FN1,G6PD,GAD2,GALM,GALNT10,GART,GC,GRHPR,GRK2,GRK6,GSTT2/GSTT2B,GTF2F2,GTF2I,HADH,HASPIN,HAT1,HBEGF,HCK,HDAC7,HDX,HIBCH,HK2,HLA,DRB1,HMBBOX1,HMGB3,HMGCS1,HMOX1,HNRNPA2B1,HPD,HSCB,HSD17B4,HSP90AB1,IDE,IFNGR1,IGF1R,IMPA2,IMPDH1,IQUB,ITGB3,ITPK1,ITPKC,ITSN1,KIF11,KLK1,KMT5A,KYNU,LRBA,MAGI2,MAP3K3,MAPK6,MARF1,MARK1,MATK,MECR,MEMO1,MMP1,MMP2,MSH2,MSN,MTAP,MUC1,MYBPC1,MYBPC3,MYSM1,NAE1,NBEA,NCBP1,NCOA3,NDC80,NDUFAB1,NF2,NFATC1,NME3,NMRK1,NOTCH1,NR1I3,NT5C3A,NUP214,OAT,ODC1,OXSR1,PA2G4,PAFAH1B2,PAH,PANK1,PAPSS1,PARN,PARP3,PATJ,PC,PCYT2,PDF,PDHA1,PDK3,PDK4,PEX5,PGK1,PHF24,PIP4K2C,PNMT,POT1,POU2F1,PPARG,PPP2R1A,PRKCB,PSAP,PTK2B,PTPRE,PTPRF,PYGL,RAB26,RAC1,RARA,RARG,RBBP6,RBM39,RGS6,RND1,RPA3,RRM1,RTN4IP1,RUVBL1,S100A6,SART3,SEC23A,SEM1,SEMA4D,SEN2,SERPINA5,SFMBT2,SH2B2,SH3YL1,SKP1,SLC5A1,SLK,SMAP1,SMG5,SMTN,SMURF2,SNX1,SNX22,SPEF1,STARD13,STK4,SUB1,SULT1A1,SYT13,TAF13,THBS2,TJP1,TLR4,TRIM21,TTR,UEVLD,USP19,UTRN,VAV3,VPS26A,WEE1,WHRN,WWP1,XRCC6,YWHAQ,YY1,ZBTB43,ZCWPW1,ZEB2,ZFP28,ZIC3,ZNF292,ZNF462                                                                        |
| 43 | Breast or ovarian cancer      | Cancer, Organismal Injury and Abnormalities, Reproductive System Disease | 1.15E,11 | 136 | ACACB,ALB,ALK,ANG,AOC3,AR,ARF6,ARHGEF1,ASAP1,B2M,BCR,BMP1,BTK,CA8,CAMK4,CANT1,CD74,CERT1,CLK1,CSDE1,CSF2RB,CSNK1G1,CSTF2,CTCF,CYP17A1,CYP2E1,DAPK2,DPP4,EP300,EPA3,ERBB4,ESR1,EXOSC9,F2,FABP7,FAP,FAS,FLNB,FN1,GAD2,GALNT10,GART,GC,GGPS1,GRK2,GRK6,HAT1,HBB,HBEGF,HCK,HDAC7,HLA,DRB1,HMGCS1,HMOX1,HNRNPA2B1,HSP90AB1,HTR1A,IFNGR1,IGF1R,IMPDH1,ITGB3,ITPA,ITPKC,ITSN1,KIF11,KMT5A,MAGEA4,MAGI2,MAP3K3,MAPK6,MARF1,MARK1,MMP1,MMP2,MSH2,MSN,MUC1,MYBPC3,NAE1,NBEA,NCOA3,NDC80,NF2,NFATC1,NOTCH1,NR1I3,NT5C3A,ODC1,OXSR1,PAFAH1B2,PARP3,PC,PDK3,PDK4,PGC,PGK1,PHF24,POU2F1,PPARG,PPP2R1A,PRKCB,PTPRE,PTPRF,PYGL,RAC1,RARA,RARG,RBBP6,RBM39,RRM1,RTN4IP1,S100A6,SEN2,SERPINA5,SFMBT2,SH3YL1,SKP1,SLC5A1,SLK,SMG7,SMTN,SMURF2,SYT13,THBS2,TLR4,TTR,USP19,UTRN,VAV3,WEE1,WWP1,XIAP,YWHAQ,YY1,ZEB2,ZNF462                                                                                                                                                                                                                                                                                                                                                                                                                                                                                                                                                                                                                                                                                                                                                |
| 44 | Multiple cancers              | Cancer, Organismal Injury and Abnormalities                              | 1.43E,11 | 139 | ACACB,ALB,ALK,ANG,AOC3,AR,ARF6,ARHGEF1,ASAP1,B2M,BCR,BMP1,BTK,CA8,CAMK4,CANT1,CD74,CERT1,CLK1,CSDE1,CSF2RB,CSNK1G1,CSTF2,CTCF,CYP17A1,CYP2E1,DAPK2,DPP4,EP300,EPA3,ERBB4,ESR1,EXOSC9,F2,FABP7,FAP,FAS,FLNB,FN1,GAD2,GALNT10,GART,GC,GGPS1,GRHPR,GRK2,GRK6,HAT                                                                                                                                                                                                                                                                                                                                                                                                                                                                                                                                                                                                                                                                                                                                                                                                                                                                                                                                                                                                                                                                                                                                                                                                                                                                                       |

|    |                                     |                                                                        |          |     |                                                                                                                                                                                                                                                                                                                                                                                                                                                                                                                                                                                                                                                                                                                                                                                                                                                                                                                                                                                                                                     |
|----|-------------------------------------|------------------------------------------------------------------------|----------|-----|-------------------------------------------------------------------------------------------------------------------------------------------------------------------------------------------------------------------------------------------------------------------------------------------------------------------------------------------------------------------------------------------------------------------------------------------------------------------------------------------------------------------------------------------------------------------------------------------------------------------------------------------------------------------------------------------------------------------------------------------------------------------------------------------------------------------------------------------------------------------------------------------------------------------------------------------------------------------------------------------------------------------------------------|
|    |                                     |                                                                        |          |     | 1,HBB,HBEGF,HCK,HDAC7,HLA,DRB1,HMGCS1,HMOX1,HNRNPA2B1,HSP90AB1,HTR1A,IFNG,IFNGR1,IGF1R,IMPDH1,ITGB3,ITPA,ITPK1,ITPKC,ITSN1,KIF11,KMT5A,MAGEA4,MAGI2,MAP3K3,MAPK6,MARF1,MARK1,MMP1,MMP2,MSH2,MSN,MUC1,MYBPC3,NAE1,NBEA,NCOA3,NDC80,NF2,NFATC1,NOTCH1,NR1I3,NT5C3A,ODC1,OXSR1,PAFAH1B2,PARP3,PC,PDK3,PDK4,PGC,PGK1,PHF24,POU2F1,PPARG,PPP2R1A,PRKCB,PTPRE,PTPRF,PYGL,RAC1,RARA,RARG,RBBP6,RBM39,RRM1,RTN4IP1,S100A6,SENP2,SERPINA5,SFMBT2,SH3YL1,SKP1,SLC5A1,SLK,SMG7,SMTN,SMURF2,SYT13,THBS2,TLR4,TTR,USP19,UTRN,VAV3,WEE1,WWP1,XIAP,YWHAQ,YY1,ZEB2,ZNF462                                                                                                                                                                                                                                                                                                                                                                                                                                                                           |
| 45 | Tumorigenesis of reproductive tract | Cancer,Organismal Injury and Abnormalities,Reproductive System Disease | 1.44E,11 | 177 | AASDHPPT,ACACB,ACADSB,ACBD7,ACY1,ALB,ALK,ANG,AOC3,APPL1,AR,ARF6,ARHGAP5,ARHGEF1,ASAP1,ATP7B,B2M,B3GAT2,BCR,BTK,BTRC,C8A,CA8,CD1A,CD74,CLCN5,CLK1,CSDE1,CSF2RB,CSNK1G1,CSTF2,CTCF,CUL1,CYP7A1,DCTD,DHPS,DMC1,DOK2,DPP4,DTYMK,EP300,EPHA3,ERBB4,ESR1,ETF1,F2,F3,FABP7,FAP,FAS,FCGR2A,FLNB,FN1,G6PD,GAD2,GART,GC,GRHR,GRK2,GTF2I,HBB,HBEGF,HCK,HDA C7,HDX,HMBOX1,HMGB3,HMOX1,HNRNPA2B1,HPD,HSD17B10,HSD17B4,HSP90AB1,HTR1A,IFNG,IFNGR1,IGF1R,IMPDH1,IQUB,ITGB3,ITPA,ITPKC,ITSN1,KIF11,LRBA,MAGEA4,MAGI2,MAP3K3,MAPK6,MARF1,MARK1,MDH1,MEMO1,MMP1,MMP2,MSH2,MSN,MUC1,MYBPC3,MYSM1,NAE1,NBEA,NCBP1,NCOA3,NF2,NFATC1,NMRK1,NMT1,NOTCH1,NR1I3,NT5C3A,NUP214,OAT,ODC1,PANK1,PARN,PARP3,PATJ,PC,PDK3,PDK4,PGC,PGK1,POU2F1,PPARG,PPP2R1A,PRKCB,PTPRE,PTPRF,PYGL,RAC1,RARA,RARG,RBBP6,RBM39,RGS6,RND1,RRM1,RTN4IP1,RUVBL1,S100A6,SART3,SENP2,SERPINA5,SF3B6,SFMBT2,SH3YL1,SKP1,SLC5A1,SLK,SMG5,SMTN,SMURF2,SNX1,STK4,SUB1,SULT1A1,SYT13,TAF13,THBS2,TJP1,TLR4,TRIM21,TR,UEVLD,UTRN,VAV3,VEGFB,WEE1,WWP1,XIAP,YY1,ZEB2,ZFP28,ZIC3,ZNF292,ZNF462 |
| 46 | Female genital neoplasm             | Cancer,Organismal Injury and Abnormalities,Reproductive System Disease | 1.63E,11 | 177 | AASDHPPT,ACACB,ACADSB,ACBD7,ACY1,ALB,ALK,ANG,AOC3,APPL1,AR,ARF6,ARHGAP5,ARHGEF1,ASAP1,ATP7B,B2M,B3GAT2,BCR,BTK,BTRC,C8A,CA8,CD1A,CD74,CLCN5,CLK1,CSDE1,CSF2RB,CSNK1G1,CSTF2,CTCF,CUL1,CYP7A1,DCTD,DHPS,DMC1,DOK2,DPP4,DTYMK,EP300,EPHA3,ERBB4,ESR1,ETF1,F2,F3,FABP7,FAP,FAS,FCGR2A,FLNB,FN1,G6PD,GAD2,GART,GC,GRHR,GRK2,GTF2I,HBB,HBEGF,HCK,HDA C7,HDX,HMBOX1,HMGB3,HMOX1,HNRNPA2B1,HPD,HSD17B10,HSD17B4,HSP90AB1,HTR1A,IFNG,IFNGR1,IGF1R,IMPDH1,IQUB,ITGB3,ITPA,ITPKC,ITSN1,KIF11,LRBA,MAGEA4,MAGI2,MAP3K3,MAPK6,MARF1,MARK1,MDH1,MEMO1,MMP1,MMP2,MSH2,MSN,MUC1,MYBPC3,MYSM1,NAE1,NBEA,NCBP1,NCOA3,NF2,NFATC1,NMRK1,NMT1,NOTCH1,NR1I3,NT5C3A,NUP214,OAT,ODC1,PANK1,PARN,PARP3,PATJ,PC,PDK3,PDK4,PGC,PGK1,POU2F1,PPARG,PPP2R1A,PRKCB,PTPRE,PTPRF,PYGL,RAC1,RARA,RARG,RBBP6,RBM39,RGS6,RND1,RRM1,RTN4IP1,RUVBL1,S100A6,SART3,SENP2,SERPINA5,SF3B6,SFMBT2,SH3YL1,SKP1,SLC5A1,SLK,SMG5,SMTN,SMURF2,SNX1,STK4,SUB1,SULT1A1,SYT13,TAF13,THBS2,TJP1,TLR4,TRIM21,TR,UEVLD,UTRN,VAV3,VEGFB,WEE1,WWP1,XIAP,YY1,ZEB2,ZFP28,ZIC3,ZNF292,ZNF462 |
| 47 | Recurrent cancer                    | Cancer,Organismal Injury and Abnormalities                             | 1.79E,11 | 24  | ALB,ALK,AR,BTK,CSF2RB,CYP17A1,ERBB4,ESR1,F3,GART,GGPS1,HCK,HDAC7,HSP90AB1,IGF1R,IMPDH1,NOTCH1,ODC1,PARP3,PTK2B,RARA,RARG,RRM1,VEGFB                                                                                                                                                                                                                                                                                                                                                                                                                                                                                                                                                                                                                                                                                                                                                                                                                                                                                                 |
| 48 | Progression of malignant tumor      | Cancer,Organismal Injury and Abnormalities,Tumor Morphology            | 1.99E,11 | 20  | ALK,AR,BTK,CSF2RB,CYP17A1,EP300,ERBB4,ESR1,F3,GART,HSP90AB1,IGF1R,NOTCH1,ODC1,PARP3,PTK2B,RARA,RARG,RRM1,VEGFB                                                                                                                                                                                                                                                                                                                                                                                                                                                                                                                                                                                                                                                                                                                                                                                                                                                                                                                      |
| 49 | Non,small cell lung carcinoma       | Cancer,Organismal Injury and Abnormalities,Respiratory Disease         | 2.01E,11 | 104 | ADH1C,ADH7,ALB,ALK,ALOX12,ANXA6,APEX1,AR,B2M,BTK,BTRC,C8A,CAMK4,CD1A,CERT1,CLK1,CSNK1G2,CTCF,CUL1,CYP17A1,CYP2E1,DGKA,DOK2,DPP4,EP300,EPHA3,ERBB4,ESR1,F2,F3,FAP,FAS,FHIT, FN1,GAD2,GART,GGPS1,GRHR,GRK6,HASPIN,HCK,HDX,HMGB3,HNRNPA2B1,HPD,HSD17B4,HSP90AB1,HTR1A,IFNG,IGF1R,ITPKC,KIF11,KYNU,LRBA,MAGEA4,MAGI2,MAPK6,MATK,MDH1,MMP1,MMP2,MSH2,MSN,MTAP,MUC1,NBEA,NCOA3,NDC80,NMT1,NOTCH1,NT5C3A,OAT,OXSR1,PAH,PANK1,PARP3,PATJ, PDK4,PGC,PIP4K2C,PPARG,PPP2R1A,PRKCB,PTK2B,PTPRE,PTPRF,PYGL,RARA,RARG,RGS6,RRM1,SEMA4D,SENP2,SERPINA5,SFN,SLK,SMG7,STK4,SULT1A1,TLR4,TTR,WWP1,ZCWPW1,ZNF292                                                                                                                                                                                                                                                                                                                                                                                                                                       |
| 50 | Head and neck carcinoma             | Cancer,Organismal Injury and Abnormalities                             | 2.03E,11 | 248 | AASDHPPT,ACACB,ACADSB,ACADVL,ACAT2,ACBD7,ACVR2B,ACY1,ADH7,ALB,ALK,ALOX12,AMY1C (includes others),ANXA6,AOC3,APPL1,AR,ARF6,ARHGAP5,ARHGEF1,ASAP1,ATP7B,ATXN3,B2M,B3GAT2,B3GAT3, BCR,BMP1,BPI,BTK,BTRC,C8A,CA8,CANT1,CD1A,CD74,CHKA,CIAO1,CLCN5,CLK1,CRYM,CSDE1,CSF2RB,CSNK1G1,CSNK1G2,CSTF2,CTCF,CUL1,CYP17A1,CYP2E1,CYP2R1,CYP7A1,DAPK2,DCTD,DCXR,DFFA,                                                                                                                                                                                                                                                                                                                                                                                                                                                                                                                                                                                                                                                                             |

|    |                               |                                            |          |     |                                                                                                                                                                                                                                                                                                                                                                                                                                                                                                                                                                                                                                                                                                                                                                                                                                                                                                                                                                                                                                                                                                                                                                                                                                                                                                                                                                                                                                                                                                                                                                                                                                                                                                                                     |
|----|-------------------------------|--------------------------------------------|----------|-----|-------------------------------------------------------------------------------------------------------------------------------------------------------------------------------------------------------------------------------------------------------------------------------------------------------------------------------------------------------------------------------------------------------------------------------------------------------------------------------------------------------------------------------------------------------------------------------------------------------------------------------------------------------------------------------------------------------------------------------------------------------------------------------------------------------------------------------------------------------------------------------------------------------------------------------------------------------------------------------------------------------------------------------------------------------------------------------------------------------------------------------------------------------------------------------------------------------------------------------------------------------------------------------------------------------------------------------------------------------------------------------------------------------------------------------------------------------------------------------------------------------------------------------------------------------------------------------------------------------------------------------------------------------------------------------------------------------------------------------------|
|    |                               |                                            |          |     | DGKA,DHPS,DMC1,DOK2,DPP4,DSG2,DTYMK,EP300,EPHA3,EPS8L2,ERBB4,ERI1,ESR1,ETF1,F2,F3,FAP,FCGR2A,FHIT,FLNB,FN1,G6PD,GAD2,GALM,GALNT10,GART,GC,GRHPR,GRK2,GRK6,GSTT2/GSTT2B,GTF2F2,GTF2I,HADH,HASPIN,HAT1,HBEGF,HCK,HDAC7,HDX,HIBCH,HK2,HLA,DRB1,HMBOX1,HMGB3,HMGCS1,HMOX1,HNRNPA2B1,HPD,HSCB,HSD17B4,HSP90AB1,HTR1A,IDE,IFNGR1,IGF1R,IMPA2,IMPDH1,IQUB,ITGB3,ITPK1,ITPKC,ITSN1,KIF11,CLK1,KMT5A,KYNU,LRBA,MAGI2,MAP3K3,MAPK6,MARF1,MARK1,MATK,MECR,MEMO1,MMP1,MMP2,MSH2,MSN,MTAP,MUC1,MYBPC1,MYBPC3,MYSM1,NAE1,NBEA,NCBP1,NCOA3,NDC80,NDUFAB1,NF2,NFATC1,NME3,NMRK1,NOTCH1,NR1I3,NT5C3A,NUP214,OAT,ODC1,OXSR1,PA2G4,PAFAH1B2,PAH,PANK1,PAPSS1,PARN,PARP3,PATJ,PC,PCYT2,PDF,PDHA1,PDK2,PDK3,PDK4,PEX5,PGK1,PHF24,PIP4K2C,PNMT,POT1,POU2F1,PPARG,PPP2R1A,PRKCB,PSAP,PTK2B,PTPRE,PTPRF,PYGL,RAB26,RAC1,RARA,RARG,RBBP6,RBM39,RGS6,RND1,RPA3,RRM1,RTN4IP1,RUVBL1,SART3,SEC23A,SEM1,SEMA4D,SEN2,SERPINA5,SFMBT2,SH2B2,SH3YL1,SKP1,SLC5A1,SLK,SMAP1,SMG5,SMG7,SMTN,SMURF2,SNX1,SNX22,SPEF1,STARD13,STK4,SUB1,SULT1A1,SYT13,THBS2,TJP1,TLR4,TRIM21,TTR,UEVLD,USP19,UTRN,VAV3,VPS26A,WEE1,WHRN,WWP1,XRCC6,YWHAQ,YY1,ZBTB43,ZCWPW1,ZEB2,ZFP28,ZIC3,ZNF292,ZNF462                                                                                                                                                                                                                                                                                                                                                                                                                                                                                                                                                                                 |
| 51 | Communication of cells        | Cell,To,Cell Signaling and Interaction     | 2.88E,11 | 50  | ACVR2B,ALK,APPL1,AR,ARHGEF1,ATXN3,BCR,BTK,BTRC,CAMK4,CSNK1G2,DAPK2,DOK2,ERBB4,ESR1,F2,FAS,FLNB,GRK2,GRK6,HASPIN,HBEGF,HLA,DRB1,HMOX1,HTR1A,IFNG,IFNGR1,IGF1R,ITPK1,ITSN1,MAGI2,MAP3K3,MAPK6,MARK1,NAE1,NFATC1,NOTCH1,NR1I3,OXSR1,PPARG,PSAP,PTK2B,RAC1,RARA,RGS6,S100A6,SFN,STK4,THBS2,VAV3                                                                                                                                                                                                                                                                                                                                                                                                                                                                                                                                                                                                                                                                                                                                                                                                                                                                                                                                                                                                                                                                                                                                                                                                                                                                                                                                                                                                                                         |
| 52 | Metastatic solid tumor        | Cancer,Organismal Injury and Abnormalities | 2.94E,11 | 39  | ALB,ALK,AOC3,AR,B2M,C1R,CSF2RB,CYP17A1,DSG2,EPHA3,ERBB4,ESR1,F2,F3,FAS,FCGR2A,FN1,GAD2,GART,GGPS1,HMOX1,HSP90AB1,IGF1R,IMPDH1,MMP2,MSH2,MUC1,NF2,NOTCH1,NR1I3,PARP3,PGC,PPP2R1A,PTK2B,RAC1,RARA,RARG,RRM1,VEGFB                                                                                                                                                                                                                                                                                                                                                                                                                                                                                                                                                                                                                                                                                                                                                                                                                                                                                                                                                                                                                                                                                                                                                                                                                                                                                                                                                                                                                                                                                                                     |
| 53 | Non,hematological solid tumor | Cancer,Organismal Injury and Abnormalities | 3.15E,11 | 285 | AASDHPPT,ACACB,ACADSB,ACADVL,ACAT2,ACBD7,ACSM2A,ACVR2B,ACY1,ADH1C,ADH7,ALB,ALK,ALOX12,AMY1C (includes others),ANG,ANXA6,AOC3,APEX1,APPL1,AR,ARF6,ARHGAP5,ARHGEF1,ASAP1,ATP7B,ATXN3,B2M,B3GAT2,B3GAT3,BCR,BMP1,BPI,BTK,BTRC,C1R,C8A,CA8,CAMK4,CANT1,CD1A,CD74,CDK5R1,CERT1,CHKA,CIAO1,CLCN5,CLK1,CRYM,CSDE1,CSF2RB,CSNK1G1,CSNK1G2,CSTF2,CTCF,CUL1,CYP17A1,CYP2E1,CYP2R1,CYP7A1,DAPK2,DCTD,DCXR,DFFA,DGKA,DHPS,DMC1,DOK2,DPP4,DSG2,DTYMK,ECHS1,ECI2,EP300,EPHA3,EPS8L2,ERBB4,ERI1,ESR1,ETF1,EXOSC9,F2,F3,FABP3,FABP7,FAP,FAS,FCGR2A,FHIT,FLNB,FN1,G6PD,GAD2,GALM,GALNT10,GART,GC,GGPS1,GRHPR,GRK2,GRK6,GSTT2/GSTT2B,GTF2F2,GTF2I,HADH,HASPIN,HAT1,HBB,HBEGF,HCK,HDAC7,HDX,HIBCH,HK2,HLA,DRB1,HMBOX1,HMGCS1,HMGCS2,HMOX1,HNRNPA2B1,HPD,HSCB,HSD17B10,HSD17B4,HSP90AB1,HTR1A,IDE,IFNG,IFNGR1,IGF1R,IMPA2,IMPDH1,IQUB,ITGB3,ITPA,ITPK1,ITPKC,ITSN1,KIF11,CLK1,KMT5A,KYNU,LRBA,MAGEA4,MAGI2,MAP3K3,MAPK6,MARF1,MARK1,MATK,MDH1,MECR,MEMO1,MMP1,MMP2,MSH2,MSN,MTAP,MUC1,MYBPC1,MYBPC3,MYSM1,NAE1,NBEA,NCBP1,NCOA3,NDC80,NDUFAB1,NF2,NFATC1,NME3,NMRK1,NMT1,NOTCH1,NR1I3,NSUN5,NT5C3A,NUP214,OAT,ODC1,OXSR1,PA2G4,PAFAH1B2,PAH,PANK1,PAPSS1,PARN,PARP3,PATJ,PC,PCYT2,PDF,PDHA1,PDK2,PDK3,PDK4,PEX5,PGC,PGK1,PHF24,PIP4K2C,PNMT,POT1,POU2F1,PPARG,PPP2R1A,PRKCB,PSAP,PTK2B,PTPRE,PTPRF,PUS10,PYGL,RAB26,RAC1,RARA,RARG,RBBP6,RBM39,RBP5,RGS6,RND1,RPA3,RRM1,RTN4IP1,RUVBL1,S100A6,SART3,SEC23A,SEM1,SEMA4D,SEN2,SERPINA5,SF3B6,SFMBT2,SFN,SH2B2,SH3YL1,SKP1,SLC5A1,SLK,SMAP1,SMG5,SMG7,SMTN,SMURF2,SNX1,SNX22,SPEF1,STARD13,STK16,STK4,SUB1,SULT1A1,SYT13,TAF13,THBS2,TIMM9,TJP1,TLR4,TNFAIP8L2,TRIM21,TTR,TXNDC12,UEVLD,USP19,UTRN,VAV3,VEGFB,VPS26A,WEE1,WHRN,WWP1,XIAP,XRCC6,YWHAH,YWHAQ,YY1,ZBTB43,ZCWPW1,ZEB2,ZFP28,ZIC3,ZNF292,ZNF462 |
| 54 | Head and neck tumor           | Cancer,Organismal Injury and Abnormalities | 3.38E,11 | 264 | AASDHPPT,ACACB,ACADSB,ACADVL,ACAT2,ACBD7,ACVR2B,ACY1,ADH7,ALB,ALK,ALOX12,AMY1C (includes others),ANXA6,AOC3,APEX1,APPL1,AR,ARF6,ARHGAP5,ARHGEF1,ASAP1,ATP7B,ATXN3,B2M,B3GAT2,B3GAT3,BCR,BMP1,BPI,BTK,BTRC,C1R,C8A,CA8,CANT1,CD1A,CD74,CHKA,CIAO1,CLCN5,CLK1,CRYM,CSDE1,CSF2RB,CSNK1G1,CSNK1G2,CSTF2,CTCF,CUL1,CYP17A1,CYP2E1,CYP2R1,CYP7A1,DAPK2,DCTD,DCXR,DFFA,DGKA,DHPS,DMC1,DOK2,DPP4,DSG2,DTYMK,EP300,EPHA3,EPS8L2,ERBB4,ERI1,ESR1,ETF1,F2,F3,FAP,FAS,FCGR2A,FHIT,FLNB,FN1,G6PD,GAD2,GALM,GALNT10,GART,GC,GRHPR,GRK2,GRK6,GSTT2/GSTT2B,GTF2F2,GTF2I,HADH,HASPIN,HAT1,HBEGF,HCK,HDAC7,HDX,HIBCH,HK2,HLA,DRB1,HMBOX                                                                                                                                                                                                                                                                                                                                                                                                                                                                                                                                                                                                                                                                                                                                                                                                                                                                                                                                                                                                                                                                                                               |

|    |                              |                                                                                           |          |     |                                                                                                                                                                                                                                                                                                                                                                                                                                                                                                                                                                                                                                                                                                                                                                                                                                                                                                                                                                                                                                                                                                                                                                                                                                                                                                                                                                                                                                                                                                                                                                                                                                                                                                                          |
|----|------------------------------|-------------------------------------------------------------------------------------------|----------|-----|--------------------------------------------------------------------------------------------------------------------------------------------------------------------------------------------------------------------------------------------------------------------------------------------------------------------------------------------------------------------------------------------------------------------------------------------------------------------------------------------------------------------------------------------------------------------------------------------------------------------------------------------------------------------------------------------------------------------------------------------------------------------------------------------------------------------------------------------------------------------------------------------------------------------------------------------------------------------------------------------------------------------------------------------------------------------------------------------------------------------------------------------------------------------------------------------------------------------------------------------------------------------------------------------------------------------------------------------------------------------------------------------------------------------------------------------------------------------------------------------------------------------------------------------------------------------------------------------------------------------------------------------------------------------------------------------------------------------------|
|    |                              |                                                                                           |          |     | 1, HMGB3, HMGC1, HMOX1, HNRNPA2B1, HPD, HSCB, HSD17B10, HSD17B4, HSP90AB1, HTR1A, IDE, IFNGR1, IGF1R, IMPA2, IMPDH1, IQUB, ITGB3, ITPK1, ITPKC, ITSN1, KIF11, KLK1, KMT5A, KYNU, LRBA, MAGEA4, MAGI2, MAP3K3, MAPK6, MARF1, MARK1, MATK, MECR, MEMO1, MMP1, MMP2, MSH2, MSN, MTAP, MUC1, MYBPC1, MYBPC3, MYSM1, NAE1, NBEA, NCBP1, NCOA3, NDC80, NDUFAB1, NF2, NFATC1, NME3, NMRK1, NMT1, NOTCH1, NR1I3, NSUN5, NT5C3A, NUP214, OAT, ODC1, OXSR1, PA2G4, PAFAH1B2, PAH, PANK1, PAPSS1, PARN, PARP3, PATJ, PC, PCYT2, PDF, PDHA1, PDK2, PDK3, PDK4, PEX5, PGC, PGK1, PHF24, PIP4K2C, PNMT, POT1, POU2F1, PPARG, PPP2R1A, PRKCB, PSAP, PTK2B, PTPRE, PTPRF, PUS10, PYGL, RAB26, RAC1, RARA, RARG, RBBP6, RBM39, RBP5, RGS6, RND1, RPA3, RRM1, RTN4IP1, RUVBL1, SART3, SEC23A, SEM1, SEMA4D, SENP2, SERPINA5, SFMBT2, SFN, SH2B2, SH3YL1, SKP1, SLC5A1, SLK, SMAP1, SMG5, SMG7, SMTN, SMURF2, SNX1, SNX22, SPEF1, STARD13, STK4, SUB1, SULT1A1, SYT13, TAF13, THBS2, TIMM9, TJP1, TLR4, TNFAIP8L2, TRIM21, TTR, UEVLD, USP19, UTRN, VAV3, VEGFB, VPS26A, WEE1, WHRN, WWP1, XIAP, XRCC6, YWHAQ, YY1, ZBTB43, ZCWPW1, ZEB2, ZFP28, ZIC3, ZNF292, ZNF462                                                                                                                                                                                                                                                                                                                                                                                                                                                                                                                                                                       |
| 55 | HIV infection                | Infectious Diseases                                                                       | 3.44E,11 | 43  | ACACB, ACADSB, ACP3, ALB, ALOX12, AR, ARF6, B2M, BCR, BMP1, C1R, CANT1, CD74, CSF2RB, DAPK2, DHPS, DPP4, EP300, ESR1, ETF1, FAS, FCGR2A, FN1, GGPS1, GRK2, HIBCH, HMGC1, IFNG, IMPDH1, IQUB, LARS1, NF2, NMT1, NUP214, PANK1, PPARG, RARA, RARG, RND1, RRM1, SUB1, XIAP, ZNF292                                                                                                                                                                                                                                                                                                                                                                                                                                                                                                                                                                                                                                                                                                                                                                                                                                                                                                                                                                                                                                                                                                                                                                                                                                                                                                                                                                                                                                          |
| 56 | Mature B, cell lymphoma      | Cancer, Hematological Disease, Immunological Disease, Organismal Injury and Abnormalities | 3.89E,11 | 39  | ALK, ANXA6, ARHGEF1, B2M, BCR, BTK, CLK1, CSF2RB, CTCF, ECI2, EP300, EPHA3, ERBB4, FAS, FCGR2A, FN1, GTF2I, HAT1, HMOX1, HSP90AB1, IFNG, IMPDH1, IQUB, ITGB3, MMP2, NOTCH1, PC, PGK1, PRKCB, PTK2B, PTPRE, PTPRF, RAC1, RRM1, SLC5A1, SNX1, TXNDC12, XIAP, XRCC6                                                                                                                                                                                                                                                                                                                                                                                                                                                                                                                                                                                                                                                                                                                                                                                                                                                                                                                                                                                                                                                                                                                                                                                                                                                                                                                                                                                                                                                         |
| 57 | Nonpituitary endocrine tumor | Cancer, Endocrine System Disorders, Organismal Injury and Abnormalities                   | 4.16E,11 | 241 | AASDHPPT, ACACB, ACADSB, ACADVL, ACAT2, ACBD7, ACVR2B, ACY1, ADH7, ALK, ALOX12, AMY1C (includes others), ANXA6, AOC3, APPL1, AR, ARHGAP5, ARHGEF1, ASAP1, ATP7B, ATXN3, B3GAT2, B3GAT3, BCR, BMP1, BPI, BTK, BTRC, C8A, CA8, CANT1, CD1A, CHKA, CIAO1, CLCN5, CLK1, CRYM, CSDE1, CSF2RB, CSNK1G1, CSNK1G2, CSTF2, CTCF, CUL1, CYP17A1, CYP2E1, CYP2R1, CYP7A1, DAPK2, DCTD, DCXR, DFFA, DGKA, DHPS, DM C1, DOK2, DPP4, DSG2, DTYMK, EP300, EPS8L2, ERBB4, ERI1, ESR1, ETF1, F2, F3, FAP3, FAP, FAS, FLNB, FN1, G6P D, GAD2, GALM, GALNT10, GART, GC, GRHPR, GRK2, GRK6, GSTT2, GSTT2B, GTF2F2, GTF2I, HADH, HASPIN, HAT1, HBEGF, HCK, HDAC7, HDX, HIBCH, HK2, HLA, DRB1, HMBOX1, HMGB3, HMGC1, HMOX1, HNRNPA2B1, HPD, HSCB, HSD17B4, HSP90AB1, IDE, IFNGR1, IGF1R, IMPA2, IMPDH1, IQUB, ITGB3, ITPK1, ITPKC, ITSN1, KIF11, KLK1, KMT5A, KYNU, LRBA, MAGI2, MAP3K3, MAPK6, MARF1, MARK1, MATK, MECR, MEMO1, MMP1, MMP2, MSH2, MSN, MTAP, MUC1, MYBPC1, MYBPC3, MYSM1, NAE1, NBEA, NCBP1, NCOA3, NDC80, NDUFAB1, NF2, NFATC1, NME3, NMRK1, NOTCH1, NR1I3, NT5C3A, NUP214, OAT, ODC1, OXSR1, PA2G4, PAFAH1B2, PAH, PANK1, PAPSS1, PARN, PARP3, PATJ, PC, PCYT2, PDF, PDHA1, PDK3, PDK4, PEX5, PGK1, PHF24, PIP4K2C, PNMT, POT1, POU2F1, PPARG, PPP2R1A, PRKCB, PSAP, PTK2B, PTPRE, PTPRF, PYGL, RAB26, RAC1, RARA, RARG, RBBP6, RBM39, RGS6, RND1, RPA3, RRM1, RTN4IP1, RUVBL1, SART3, SEC23A, SEM1, SEMA4D, SENP2, SERPINA5, SFMBT2, SH2B2, SH3YL1, SKP1, SLC5A1, SLK, SMAP1, SMG5, SMTN, SMURF2, SNX1, SNX22, SPEF1, STARD13, STK4, SUB1, SULT1A1, SYT13, TAF13, THBS2, TJP1, TLR4, TRIM21, TTR, UEVLD, USP19, UTRN, VAV3, VPS26A, WEE1, WHRN, WWP1, XRCC6, YWHAQ, YY1, ZBTB43, ZCWPW1, ZEB2, ZFP28, ZIC3, ZNF292, ZNF462 |
| 58 | Cancer of cells              | Cancer, Organismal Injury and Abnormalities                                               | 4.32E,11 | 161 | ALB, ALK, ALOX12, ANXA6, AOC3, AR, ARF6, ARHGAP5, ARHGEF1, ASAP1, ATXN3, B2M, BCR, BPI, BTK, BTRC, C1R, C8A, CAMK4, CD1A, CD74, CDK5R1, CERT1, CIAO1, CLK1, CSDE1, CSF2RB, CSNK1G1, CSNK1G2, CSTF2, CTCF, CUL1, CYP2E1, CYP7A1, DGKA, DOK2, DPP4, DSG2, ECI2, EP300, EPHA3, EPS8L2, ERBB4, F2, F3, FAP, FAS, FCGR2A, FHIT, FN1, GAD2, GALM, GART, GGPS1, GRHPR, GRK2, GTF2F2, GTF2I, HASPIN, HAT1, HBB, HBEGF, HCK, HDAC7, HDX, HLA, DRB1, HMOX1, HNRNPA2B1, HSCB, HSP90AB1, HTR1A, IDE, IFNG, IFNGR1, IGF1R, IMPDH1, IQUB, ITGB3, ITPK1, ITPKC, KLK1, KMT5A, LRBA, MAGI2, MAPK6, MATK, MDH1, MECR, MMP1, MMP2, MSH2, MSN, MTAP, MUC1, MYBPC1, NAE1, NCBP1, NCOA3, NDC80, NDUFAB1, NF2, NFATC1, NOTCH1, NT5C3A, NUP214, OAT, ODC1, OXSR1, PANK1, PARP3, PATJ, PC, PDK2, PDK4, PGC, PGK1, POT1, POU2F1, PPARG, PPP2R1A, PRKCB, PSAP, PTK2B, PTPRE, PTPRF, PYGL, RAC1, RARA, RARG, RBBP6, RGS6, RRM1, SEM1, SEMA4D, SENP2, SERPINA5, SFMBT2, SH2B2, SLC5A1, SLK, SMG5, SMG7, SMTN, SNX1, STK4, SYT13, TAF13, THBS2, TJP1, TLR4, TTR, TXNDC12, VAV3, WWP1, XIAP, XRCC6, ZEB2, ZFP28, ZIC3, ZNF292, ZNF462                                                                                                                                                                                                                                                                                                                                                                                                                                                                                                                                                                                                                   |



|    |                                   |                                                                                        |          |     |                                                                                                                                                                                                                                                                                                                                                                                                                                                                                                                                                                                                                                                                                                                                                                                                                                                                                                                                                                                                                                                                                                                                                                                                                                                                                                                                                                                                                                                                        |
|----|-----------------------------------|----------------------------------------------------------------------------------------|----------|-----|------------------------------------------------------------------------------------------------------------------------------------------------------------------------------------------------------------------------------------------------------------------------------------------------------------------------------------------------------------------------------------------------------------------------------------------------------------------------------------------------------------------------------------------------------------------------------------------------------------------------------------------------------------------------------------------------------------------------------------------------------------------------------------------------------------------------------------------------------------------------------------------------------------------------------------------------------------------------------------------------------------------------------------------------------------------------------------------------------------------------------------------------------------------------------------------------------------------------------------------------------------------------------------------------------------------------------------------------------------------------------------------------------------------------------------------------------------------------|
| 59 | Relapsed malignant solid tumor    | Cancer,Organismal Injury and Abnormalities                                             | 4.53E,11 | 20  | ALB,ALK,AR,BTK,CSF2RB,CYP17A1,ERBB4,ESR1,F3,GART,HDAC7,HSP90AB1,IGF1R,IMPDH1,ODC1,PARP3,PTK2B,RARA,RARG,RRM1                                                                                                                                                                                                                                                                                                                                                                                                                                                                                                                                                                                                                                                                                                                                                                                                                                                                                                                                                                                                                                                                                                                                                                                                                                                                                                                                                           |
| 60 | Lymphoreticular neoplasm          | Cancer,Organismal Injury and Abnormalities                                             | 4.65E,11 | 101 | ALK,AMY1C (includes others),ANXA6,APEX1,ARHGEF1,ATXN3,B2M,BCR,BMP1,BTK,BTRC,C1R,CANT1,CD1A,CD74,CLK1,CSDE1,CSF2RB,CSNK1G2,CSTF2,CTCF,CYP2E1,CYP2R1,DGKA,DPP4,ECI2,EP300,EPHA3,ERBB4,ESR1,ETF1,F3,FAP,FAS,FCGR2A,FGIT,FN1,GAD2,GART,GGPS1,GTF2I,HAT1,HCK,HDAC7,HLA,DRB1,HMGB3,HMOX1,HN RNPA2B1,HSP90AB1,IFNG,IGF1R,IMPDH1,IQUB,ITGB3,KLK1,KMT5A,MAGEA4,MMP1,MMP2,MSH2,MUC 1,NCBP1,NFATC1,NOTCH1,NT5C3A,NUP214,ODC1,PA2G4,PC,PDHA1,PDK3,PDK4,PGK1,POT1,POU2F1,PR KCB,PTK2B,PTPRE,PTPRF,RAC1,RARA,RARG,RRM1,SEM1,SH2B2,SLC5A1,SMG7,SMTN,SNX1,STK4,THBS 2,TJP1,TLR4,TXNDC12,UEVLD,VAV3,VEGFB,WEE1,XIAP,XRCC6,ZNF292                                                                                                                                                                                                                                                                                                                                                                                                                                                                                                                                                                                                                                                                                                                                                                                                                                                        |
| 61 | Breast cancer                     | Cancer,Organismal Injury and Abnormalities,Reproductive System Disease                 | 4.76E,11 | 107 | ACACB,ALB,ALK,ANG,AR,ARHGEF1,BCR,BMP1,BTK,CAMK4,CANT1,CERT1,CLK1,CSDE1,CSF2RB,CSNK 1G1,CTCF,CYP17A1,CYP2E1,DAPK2,DPP4,EP300,EPHA3,ERBB4,ESR1,EXOSC9,FABP7,FAP,FAS,FLNB,FN1, GALNT10,GGPS1,GRK2,GRK6,HAT1,HBB,HBEGF,HCK,HDAC7,HLA,DRB1,HMGCS1,HMOX1,HSP90AB1,IG F1R,IMPDH1,ITGB3,ITPKC,KIF11,KMT5A,MAGEA4,MAPK6,MARF1,MARK1,MMP1,MMP2,MSH2,MSN,MU C1,MYBPC3,NAE1,NBEA,NCOA3,NDC80,NF2,NFATC1,NOTCH1,ODC1,OXSR1,PAFAH1B2,PARP3,PC,PDK3, PDK4,PGK1,PHF24,POU2F1,PPARG,PPP2R1A,PRKCB,PTPRE,PTPRF,RAC1,RARA,RARG,RBBP6,RBM39,RR M1,S100A6,SENP2,SERPINA5,SLC5A1,SLK,SMG7,SMTN,SMURF2,SYT13,TLR4,TTR,USP19,UTRN,VAV3,W EE1,YWHAQ,YY1,ZEB2,ZNF462                                                                                                                                                                                                                                                                                                                                                                                                                                                                                                                                                                                                                                                                                                                                                                                                                             |
| 62 | Progressive malignant solid tumor | Cancer,Organismal Injury and Abnormalities,Tumor Morphology                            | 5.25E,11 | 18  | ALK,AR,BTK,CSF2RB,CYP17A1,ERBB4,ESR1,F3,GART,HSP90AB1,IGF1R,ODC1,PARP3,PTK2B,RARA,RAR G,RRM1,VEGFB                                                                                                                                                                                                                                                                                                                                                                                                                                                                                                                                                                                                                                                                                                                                                                                                                                                                                                                                                                                                                                                                                                                                                                                                                                                                                                                                                                     |
| 63 | B,cell lymphoma                   | Cancer,Hematological Disease,Immunological Disease,Organismal Injury and Abnormalities | 5.78E,11 | 53  | ALK,ANXA6,ARHGEF1,ATXN3,B2M,BCR,BTK,CLK1,CSDE1,CSF2RB,CSTF2,CTCF,DGKA,ECI2,EP300,EPH A3,ERBB4,FAS,FCGR2A,FN1,GTF2I,HAT1,HDAC7,HMOX1,HSP90AB1,IFNG,IMPDH1,IQUB,ITGB3,MMP2,M UC1,NCBP1,NFATC1,NOTCH1,NUP214,PC,PGK1,POT1,PRKCB,PTK2B,PTPRE,PTPRF,RAC1,RRM1,SEM1,SL C5A1,SNX1,THBS2,TXNDC12,VAV3,XIAP,XRCC6,ZNF292                                                                                                                                                                                                                                                                                                                                                                                                                                                                                                                                                                                                                                                                                                                                                                                                                                                                                                                                                                                                                                                                                                                                                        |
| 64 | Thyroid carcinoma                 | Cancer,Endocrine System Disorders,Organismal Injury and Abnormalities                  | 6.07E,11 | 238 | AASDHPPT,ACACB,ACADSB,ACADVL,ACAT2,ACBD7,ACVR2B,ACY1,ADH7,ALK,ALOX12,AMY1C (includes others),ANXA6,AOC3,APPL1,AR,ARHGAP5,ARHGEF1,ASAP1,ATP7B,ATXN3,B3GAT2,B3GAT3,BCR,BMP1, BPI,BTK,BTRC,C8A,CA8,CANT1,CD1A,CHKA,CHIAO1,CLCN5,CLK1,CRYM,CSDE1,CSF2RB,CSNK1G1,CSN K1G2,CSTF2,CTCF,CUL1,CYP17A1,CYP2E1,CYP2R1,CYP7A1,DAPK2,DCTD,DCXR,DFFA,DGKA,DHPS,DM C1,DOK2,DPP4,DSG2,DTYMK,EP300,EPS8L2,ERBB4,ERI1,ESR1,ETF1,F2,F3,FAP,FLNB,FN1,G6PD,GAD2,GA LM,GALNT10,GART,GC,GRHPR,GRK2,GRK6,GSTT2/GSTT2B,GTF2F2,GTF2I,HADH,HASPIN,HAT1,HBEGF, HCK,HDAC7,HDX,HIBCH,HK2,HLA,DRB1,HMBOX1,HMGB3,HMGCS1,HMOX1,HNRNPA2B1,HPD,HSCB,H SD17B4,HSP90AB1,IDE,IFNGR1,IGF1R,IMPA2,IMPDH1,IQUB,ITGB3,ITPK1,ITPKC,ITSN1,KIF11,KLK1,KMT 5A,KYNU,LRBA,MAGI2,MAP3K3,MAPK6,MARF1,MARK1,MATK,MECR,MEMO1,MMP1,MMP2,MSH2,MSN ,MTAP,MUC1,MYBPC1,MYBPC3,MYSM1,NAE1,NBEA,NCBP1,NCOA3,NDC80,NDUFAB1,NF2,NFATC1,NP E3,NMRK1,NOTCH1,NR1I3,NT5C3A,NUP214,OAT,ODC1,OXSR1,PA2G4,PAFAH1B2,PAH,PANK1,PAPSS1,P ARN,PARP3,PATJ,PC,PCYT2,PDF,PDHA1,PDK3,PDK4,PEX5,PGK1,PHF24,PIP4K2C,PNMT,POT1,POU2F1,PP ARG,PPP2R1A,PRKCB,PSAP,PTK2B,PTPRE,PTPRF,PYGL,RAB26,RAC1,RARA,RARG,RBBP6,RBM39,RGS6, RND1,RPA3,RRM1,RTN4IP1,RUVBL1,SART3,SEC23A,SEM1,SEMA4D,SENP2,SERPINA5,SFMBT2,SH2B2,SH 3YL1,SKP1,SLC5A1,SLK,SMAP1,SMG5,SMTN,SMURF2,SNX1,SNX22,SPEF1,STARD13,STK4,SUB1,SULT1A 1,SYT13,THBS2,TJP1,TLR4,TRIM21,TTR,UEVLD,USP19,UTRN,VAV3,VPS26A,WEE1,WHRN,WWP1,XRCC6, YWHAQ,YY1,ZBTB43,ZCWPW1,ZEB2,ZFP28,ZIC3,ZNF292,ZNF462 |
| 65 | Pelvic tumor                      | Cancer,Organismal Injury and Abnormalities                                             | 6.25E,11 | 213 | AASDHPPT,ACACB,ACADSB,ACADVL,ACBD7,ACP3,ACY1,ADH7,ALB,ALK,ANG,ANXA6,AOC3,APEX1,A PPL1,AR,ARF6,ARHGAP5,ARHGEF1,ASAP1,ATP7B,B2M,B3GAT2,BCR,BMP1,BTK,BTRC,C1R,C8A,CA8,CA NT1,CD1A,CD74,CLCN5,CLK1,CSDE1,CSF2RB,CSNK1G1,CSTF2,CTCF,CUL1,CYP17A1,CYP2E1,CYP7A1,D CTD,DGKA,DHPS,DMC1,DOK2,DPP4,DTYMK,EP300,EPHA3,EPS8L2,ERBB4,ESR1,ETF1,F2,F3,FABP7,FAP,F AS,FCGR2A,FLNB,FN1,G6PD,GAD2,GALM,GALNT10,GART,GC,GGPS1,GRHPR,GRK2,GTF2I,HASPIN,HBB,                                                                                                                                                                                                                                                                                                                                                                                                                                                                                                                                                                                                                                                                                                                                                                                                                                                                                                                                                                                                                               |

|    |                          |                                                                         |          |     |                                                                                                                                                                                                                                                                                                                                                                                                                                                                                                                                                                                                                                                                                                                                                                                                                                                                                                                                                                                                                                                                                                                                                                                                                                                                                                                                                                                                                                                                                                                                                                                                                                                                                                                                         |
|----|--------------------------|-------------------------------------------------------------------------|----------|-----|-----------------------------------------------------------------------------------------------------------------------------------------------------------------------------------------------------------------------------------------------------------------------------------------------------------------------------------------------------------------------------------------------------------------------------------------------------------------------------------------------------------------------------------------------------------------------------------------------------------------------------------------------------------------------------------------------------------------------------------------------------------------------------------------------------------------------------------------------------------------------------------------------------------------------------------------------------------------------------------------------------------------------------------------------------------------------------------------------------------------------------------------------------------------------------------------------------------------------------------------------------------------------------------------------------------------------------------------------------------------------------------------------------------------------------------------------------------------------------------------------------------------------------------------------------------------------------------------------------------------------------------------------------------------------------------------------------------------------------------------|
|    |                          |                                                                         |          |     | HBEGF,HCK,HDAC7,HDX,HLA,DRB1,HMBOX1,HMGB3,HMOX1,HNRNPA2B1,HPD,HSD17B10,HSD17B4,HSP90AB1,HTR1A,IFNG,IFNGR1,IGF1R,IMPDH1,IQUB,ITGB3,ITPA,ITPKC,ITSN1,KIF11,KMT5A,KYNU,LRBA,MAGEA4,MAGI2,MAP3K3,MAPK6,MARF1,MARK1,MATK,MDH1,MEMO1,MMP1,MMP2,MSH2,MSN,MTAP,MUC1,MYBPC1,MYBPC3,MYSM1,NAE1,NBEA,NCBP1,NCOA3,NF2,NFATC1,NMRK1,NMT1,NOTCH1,NR1I3,NT5C3A,NUP214,OAT,ODC1,OXSR1,PA2G4,PAH,PANK1,PAPSS1,PARN,PARP3,PATJ,PC,PDK3,PDK4,PGC,PGK1,PHF24,POU2F1,PPARG,PPP2R1A,PRKCB,PSAP,PTK2B,PTPRE,PTPRF,PYGL,RAC1,RARA,RARG,RBBP6,RBM39,RGS6,RND1,RRM1,RTN4IP1,RUVBL1,S100A6,SART3,SEMA4D,SEN2,SERPINA5,SF3B6,SFMBT2,SFN,SH3YL1,SKP1,SLC5A1,SLK,SMAP1,SMG5,SMTN,SMURF2,SNX1,STK4,SUB1,SULT1A1,SYT13,TAFF13,THBS2,TJP1,TLR4,TRIM21,TTR,UEVLD,USP19,UTRN,VAV3,VEGFB,WEE1,WHRN,WWP1,XIAP,YWHAQ,YY1,ZCWPW1,ZEB2,ZFP28,ZIC3,ZNF292,ZNF462                                                                                                                                                                                                                                                                                                                                                                                                                                                                                                                                                                                                                                                                                                                                                                                                                                                                                                                 |
| 66 | Extracranial solid tumor | Cancer,Organismal Injury and Abnormalities                              | 6.96E,11 | 286 | AASDHPPT,ACACB,ACADSB,ACADVL,ACAT2,ACBD7,ACP3,ACSM2A,ACVR2B,ACY1,ADH1C,ADH7,ALB,ALK,ALOX12,AMY1C (includes others),ANG,ANXA6,AOC3,APEX1,APPL1,AR,ARF6,ARHGAP5,ARHGEF1,ASAP1,ATP7B,ATXN3,B2M,B3GAT2,B3GAT3,BCR,BMP1,BPI,BTK,BTRC,C1R,C8A,CA8,CAMK4,CANT1,CD1A,CD74,CDK5R1,CERT1,CHKA,CLAO1,CLCN5,CLK1,CRYM,CSDE1,CSF2RB,CSNK1G1,CSNK1G2,CSTF2,CTCF,CUL1,CYP17A1,CYP2E1,CYP2R1,CYP7A1,DAPK2,DCTD,DCXR,DDFA,DGKA,DHPS,DMC1,DOK2,DPP4,DSG2,DTYMK,ECHS1,ECI2,EP300,EPHA3,EPSS8L2,ERBB4,ERI1,ESR1,ETF1,EXOSC9,F2,F3,FABP3,FABP7,FAP,FAS,FCGR2A,FHIT,FLNB,FN1,G6PD,GAD2,GALM,GALNT10,GART,GC,GGPS1,GRHPR,GRK2,GRK6,GSTT2/GSTT2B,GTF2F2,GTF2I,HADH,HASPIN,HAT1,HBB,HBEGF,HCK,HDAC7,HDX,HIBCH,HK2,HLA,DRB1,HMBOX1,HMGB3,HMGCS1,HMOX1,HNRNPA2B1,HPD,HSCB,HSD17B10,HSD17B4,HSP90AB1,HTR1A,IDE,IFNG,IFNGR1,IGF1R,IMPA2,IMPDH1,IQUB,ITGB3,ITPA,ITPK1,ITPKC,ITSN1,KIF11,KLK1,KMT5A,KYNU,LRBA,MAGEA4,MAGI2,MAP3K3,MAPK6,MARF1,MARK1,MATK,MDH1,MECR,MEMO1,MMP1,MMP2,MSH2,MSN,MTAP,MUC1,MYBPC1,MYBPC3,MYSM1,NAE1,NBEA,NCBP1,NCOA3,NDC80,NDUFAB1,NF2,NFATC1,NME3,NMRK1,NMT1,NOTCH1,NR1I3,NSUN5,NT5C3A,NUP214,OAT,ODC1,OXSR1,PA2G4,PAFAH1B2,PAH,PANK1,PAPSS1,PARN,PARP3,PATJ,PC,PCYT2,PDF,PDHA1,PDK2,PDK3,PDK4,PEX5,PGC,PGK1,PHF24,PIP4K2C,PNMT,POT1,POU2F1,PPARG,PPP2R1A,PRKCB,PSAP,PTK2B,PTPRE,PTPRF,PUS10,PYGL,RAB26,RAC1,RARA,RARG,RBBP6,RBM39,RBP5,RGS6,RND1,RPA3,RRM1,RTN4IP1,RUVBL1,S100A6,SART3,SEC23A,SEM1,SEMA4D,SEN2,SERPINA5,SF3B6,SFMBT2,SFN,SH2B2,SH3YL1,SKP1,SLC5A1,SLK,SMAP1,SMG5,SMG7,SMTN,SMURF2,SNX1,SNX2,SPEF1,STARD13,STK16,STK4,SUB1,SULT1A1,SYT13,TAF13,THBS2,TIMM9,TJP1,TLR4,TNFAIP8L2,TRIM21,TTR,TXNDC12,UEVLD,USP19,UTRN,VAV3,VEGFB,VPS26A,WEE1,WHRN,WWP1,XIAP,XRCC6,YWHAH,YWHAQ,YY1,ZBTB43,ZCWPW1,ZEB2,ZFP28,ZIC3,ZNF292,ZNF462 |
| 67 | Urinary tract cancer     | Cancer,Organismal Injury and Abnormalities,Renal and Urological Disease | 8.13E,11 | 94  | ACACB,ALB,ALK,AOC3,AR,ARHGAP5,ASAP1,ATXN3,B2M,BCR,BMP1,BTK,BTRC,CANT1,CSF2RB,CSTF2,CTCF,CUL1,CYP17A1,DGKA,DHPS,DOK2,ECHS1,EP300,EPHA3,EPSS8L2,ERBB4,ESR1,FAP,FN1,G6PD,GART,GGPS1,GRHPR,HBB,HIBCH,HLA,DRB1,HMOX1,HNRNPA2B1,HSD17B4,HSP90AB1,IGF1R,IMPDH1,ITGB3,KIF11,KLK1,KMT5A,KYNU,MAGEA4,MAGI2,MARF1,MMP2,MSH2,MTAP,MUC1,MYBPC1,NCOA3,NF2,NOTCH1,NR1I3,NT5C3A,NUP214,ODC1,PA2G4,PAH,PANK1,PDK4,PPARG,PPP2R1A,PRKCB,PSAP,PTK2B,PTPRE,PTPRF,PYGL,RARA,RARG,RBBP6,RBM39,RBP5,RRM1,SLC5A1,SMG7,SMTN,SULT1A1,THBS2,TJP1,TLR4,UTRN,XIAP,ZCWPW1,ZEB2,ZNF292,ZNF462                                                                                                                                                                                                                                                                                                                                                                                                                                                                                                                                                                                                                                                                                                                                                                                                                                                                                                                                                                                                                                                                                                                                                                           |
| 68 | Urinary tract tumor      | Cancer,Organismal Injury and Abnormalities,Renal and Urological Disease | 8.77E,11 | 95  | ACACB,ALB,ALK,AOC3,AR,ARHGAP5,ASAP1,ATXN3,B2M,BCR,BMP1,BTK,BTRC,CANT1,CSF2RB,CSTF2,CTCF,CUL1,CYP17A1,DGKA,DHPS,DOK2,ECHS1,EP300,EPHA3,EPSS8L2,ERBB4,ESR1,FAP,FN1,G6PD,GART,GGPS1,GRHPR,HBB,HIBCH,HLA,DRB1,HMOX1,HNRNPA2B1,HSD17B4,HSP90AB1,IGF1R,IMPDH1,ITGB3,KIF11,KLK1,KMT5A,KYNU,MAGEA4,MAGI2,MARF1,MMP2,MSH2,MTAP,MUC1,MYBPC1,NCOA3,NF2,NOTCH1,NR1I3,NT5C3A,NUP214,ODC1,PA2G4,PAH,PANK1,PDK4,PPARG,PPP2R1A,PRKCB,PSAP,PTK2B,PTPRE,PTPRF,PYGL,RARA,RARG,RBBP6,RBM39,RBP5,RRM1,SLC5A1,SMG7,SMTN,SULT1A1,THBS2,TJP1,TLR4,UTRN,XIAP,YY1,ZCWPW1,ZEB2,ZNF292,ZNF462                                                                                                                                                                                                                                                                                                                                                                                                                                                                                                                                                                                                                                                                                                                                                                                                                                                                                                                                                                                                                                                                                                                                                                       |
| 69 | Formation of solid tumor | Cancer,Organismal Injury and Abnormalities                              | 9.85E,11 | 259 | AASDHPPT,ACACB,ACADSB,ACADVL,ACBD7,ACVR2B,ACY1,ADH1C,ADH7,ALB,ALK,ALOX12,AMY1C (includes others),AOC3,APEX1,APPL1,AR,ARF6,ARHGAP5,ARHGEF1,ASAP1,ATP7B,ATXN3,B2M,B3GAT2,BCR,BMP1,BPI,BTK,BTRC,C1R,C8A,CA8,CAMK4,CANT1,CD1A,CDK5R1,CERT1,CHKA,CLCN5,CLK1,CRYM,CSDE1,CSF2RB,CSNK1G1,CSNK1G2,CSTF2,CTCF,CUL1,CYP17A1,CYP2E1,CYP7A1,DAPK2,DCTD,DCXR,DDFA,D                                                                                                                                                                                                                                                                                                                                                                                                                                                                                                                                                                                                                                                                                                                                                                                                                                                                                                                                                                                                                                                                                                                                                                                                                                                                                                                                                                                   |

|    |                                   |                                                                        |          |     |                                                                                                                                                                                                                                                                                                                                                                                                                                                                                                                                                                                                                                                                                                                                                                                                                                                                                                                                                                                                                                                                                                                                                                                                                                                                                                                                                                                                                                                                                                                                                                                                                                                                                                                                                                                                                                                                                                                                                                                                                                                                                                                                                                                                                                                                                                                                                                                                                                                                                                                                                                                                                                                                                                                                                                                                                                                                                                                                                                                                                                                                                                                                                                                                                                                                                                                                                                                                                                                                                                                                                                                                                                                                                                                                                                                                                                                                                                                                                                                                                                                                                                                                                                                                                                                                                                                                                                                                                                                                                                                                                                                                                                                                                                                                                                                                                                                                                                                                                                                                                                                                                                                                                                                                                                                                                                                                                                                                                                                                                                                                                                                                                                                                                                                                                                                                                                                                                                                                                                                                                                                                                                                                                                                                                                                                                                                                                                                                                                                                                                                                                                                                                                                                                                                                                                                                                                                                                                                                                                                                                                                                                                                                                                                                                                                                                                                                                                                                                                                                                                                                                                                                                                                                                                                                                                                                                                                                                                                                                                        |
|----|-----------------------------------|------------------------------------------------------------------------|----------|-----|------------------------------------------------------------------------------------------------------------------------------------------------------------------------------------------------------------------------------------------------------------------------------------------------------------------------------------------------------------------------------------------------------------------------------------------------------------------------------------------------------------------------------------------------------------------------------------------------------------------------------------------------------------------------------------------------------------------------------------------------------------------------------------------------------------------------------------------------------------------------------------------------------------------------------------------------------------------------------------------------------------------------------------------------------------------------------------------------------------------------------------------------------------------------------------------------------------------------------------------------------------------------------------------------------------------------------------------------------------------------------------------------------------------------------------------------------------------------------------------------------------------------------------------------------------------------------------------------------------------------------------------------------------------------------------------------------------------------------------------------------------------------------------------------------------------------------------------------------------------------------------------------------------------------------------------------------------------------------------------------------------------------------------------------------------------------------------------------------------------------------------------------------------------------------------------------------------------------------------------------------------------------------------------------------------------------------------------------------------------------------------------------------------------------------------------------------------------------------------------------------------------------------------------------------------------------------------------------------------------------------------------------------------------------------------------------------------------------------------------------------------------------------------------------------------------------------------------------------------------------------------------------------------------------------------------------------------------------------------------------------------------------------------------------------------------------------------------------------------------------------------------------------------------------------------------------------------------------------------------------------------------------------------------------------------------------------------------------------------------------------------------------------------------------------------------------------------------------------------------------------------------------------------------------------------------------------------------------------------------------------------------------------------------------------------------------------------------------------------------------------------------------------------------------------------------------------------------------------------------------------------------------------------------------------------------------------------------------------------------------------------------------------------------------------------------------------------------------------------------------------------------------------------------------------------------------------------------------------------------------------------------------------------------------------------------------------------------------------------------------------------------------------------------------------------------------------------------------------------------------------------------------------------------------------------------------------------------------------------------------------------------------------------------------------------------------------------------------------------------------------------------------------------------------------------------------------------------------------------------------------------------------------------------------------------------------------------------------------------------------------------------------------------------------------------------------------------------------------------------------------------------------------------------------------------------------------------------------------------------------------------------------------------------------------------------------------------------------------------------------------------------------------------------------------------------------------------------------------------------------------------------------------------------------------------------------------------------------------------------------------------------------------------------------------------------------------------------------------------------------------------------------------------------------------------------------------------------------------------------------------------------------------------------------------------------------------------------------------------------------------------------------------------------------------------------------------------------------------------------------------------------------------------------------------------------------------------------------------------------------------------------------------------------------------------------------------------------------------------------------------------------------------------------------------------------------------------------------------------------------------------------------------------------------------------------------------------------------------------------------------------------------------------------------------------------------------------------------------------------------------------------------------------------------------------------------------------------------------------------------------------------------------------------------------------------------------------------------------------------------------------------------------------------------------------------------------------------------------------------------------------------------------------------------------------------------------------------------------------------------------------------------------------------------------------------------------------------------------------------------------------------------------------------------------------------------------------------------------------------------------------------------------------------------------------------------------------------------------------------------------------------------------------------------------------------------------------------------------------------------------------------------------------------------------------------------------------------------------------------------------------------------------------------------------------------------------------------------|
|    |                                   |                                                                        |          |     | GKA,DHPS,DMC1,DOK2,DPP4,DSG2,DTYMK,ECHS1,EP300,EPHA3,EPS8L2,ERBB4,ESR1,ETF1,EXOSC9,F2,F3,FABP3,FABP7,FAP,FAS,FCGR2A,FHIT,FLNB,FN1,G6PD,GAD2,GALNT10,GART,GGPS1,GRHPR,GRK2,GRK6,GTF2I,HADH,HASPIN,HAT1,HBB,HBEGF,HCK,HDAC7,HDX,HIBCH,HK2,HLA,DRB1,HMBOX1,HMGB3,HMGCS1,HMOX1,HNRNPA2B1,HPD,HSD17B10,HSD17B4,HSP90AB1,HTR1A,IDE,IFNG,IFNGR1,IGF1R,IMP1,IMP2,IMP3,MAPK6,MARF1,MARK1,MATK,MDH1,MEMO1,MMP1,MMP2,MSH2,MSN,MTAP,MUC1,MYBPC1,MYBPC3,MYSM1,NAE1,NBEA,NCBP1,NCOA3,NDC80,NF2,NFATC1,NME3,NMRK1,NMT1,NOTCH1,NR1I3,NT5C3A,NUP214,OAT,ODC1,OXSR1,PA2G4,PAFAH1B2,PAH,PANK1,PAPSS1,PARN,PARP3,PATJ,PC,PCYT2,PDHA1,PDK3,PDK4,PEX5,PGC,PGK1,PHF24,PIP4K2C,POT1,POU2F1,PPARG,PPP2R1A,PRKCB,PSAP,PTK2B,PTPRE,PTPRF,PUS10,PYGL,RAC1,RARA,RARG,RBBP6,RBM39,RBP5,RGS6,RND1,RRM1,RTN4IP1,RUVBL1,S100A6,SART3,SEMA4D,SENP2,SERPINA5,SF3B6,SFMBT2,SFN,SH2B2,SH3YL1,SKP1,SLC5A1,SLK,SMAP1,SMG5,SMG7,SMTN,SMURF2,SNX1,SPEF1,STARD13,STK16,STK4,SUB1,SULT1A1,SYT13,TAF13,THBS2,TIMM9,TJP1,TLR4,TNFAIP8L2,TRIM21,TTR,UEVLD,USP19,UTRN,VAV3,VEGFB,VPS26A,WEE1,WHRN,WWP1,XIAP,XRCC6,YWHAH,YWHAQ,YY1,ZBTB43,ZCWPW1,ZEB2,ZFP28,ZIC3,ZNF292,ZNF462                                                                                                                                                                                                                                                                                                                                                                                                                                                                                                                                                                                                                                                                                                                                                                                                                                                                                                                                                                                                                                                                                                                                                                                                                                                                                                                                                                                                                                                                                                                                                                                                                                                                                                                                                                                                                                                                                                                                                                                                                                                                                                                                                                                                                                                                                                                                                                                                                                                                                                                                                                                                                                                                                                                                                                                                                                                                                                                                                                                                                                                                                                                                                                                                                                                                                                                                                                                                                                                                                                                                                                                                                                                                                                                                                                                                                                                                                                                                                                                                                                                                                                                                                                                                                                                                                                                                                                                                                                                                                                                                                                                                                                                                                                                                                                                                                                                                                                                                                                                                                                                                                                                                                                                                                                                                                                                                                                                                                                                                                                                                                                                                                                                                                                                                                                                                                                                                                                                                                                                                                                                                                                                                                                                                                                                                                                                                                                                                                                                                                                                                                                                                                                                                                                                                                                                                                                         |
| 70 | Mammary tumor                     | Cancer,Organismal Injury and Abnormalities,Reproductive System Disease | 9.85E,11 | 108 | ACACB,ALB,ALK,ANG,AR,ARHGEF1,ASAP1,BCR,BMP1,BTK,CAMK4,CANT1,CERT1,CLK1,CSDE1,CSF2RB,CSNK1G1,CTCF,CYP17A1,CYP2E1,DAPK2,DPP4,EP300,EPHA3,ERBB4,ESR1,EXOSC9,FABP7,FAP,FAS,FLNB,FN1,GALNT10,GGPS1,GRK2,GRK6,HAT1,HBB,HBEGF,HCK,HDAC7,HLA,DRB1,HMGCS1,HMOX1,HSP90AB1,IGF1R,IMP1,IMP2,IMP3,MAPK6,MARF1,MARK1,MMP1,MMP2,MSH2,MSN,MUC1,MYBPC3,NAE1,NBEA,NCOA3,NDC80,NF2,NFATC1,NOTCH1,ODC1,OXSR1,PAFAH1B2,PARP3,PC,PDK3,PDK4,PGK1,PHF24,POU2F1,PPARG,PPP2R1A,PRKCB,PTPRE,PTPRF,RAC1,RARA,RARG,RBBP6,RBM39,RRM1,S100A6,SENP2,SERPINA5,SLC5A1,SLK,SMG7,SMTN,SMURF2,SYT13,TLR4,TTR,USP19,UTRN,VAV3,WEE1,YWHAQ,YY1,ZEB2,ZNF462                                                                                                                                                                                                                                                                                                                                                                                                                                                                                                                                                                                                                                                                                                                                                                                                                                                                                                                                                                                                                                                                                                                                                                                                                                                                                                                                                                                                                                                                                                                                                                                                                                                                                                                                                                                                                                                                                                                                                                                                                                                                                                                                                                                                                                                                                                                                                                                                                                                                                                                                                                                                                                                                                                                                                                                                                                                                                                                                                                                                                                                                                                                                                                                                                                                                                                                                                                                                                                                                                                                                                                                                                                                                                                                                                                                                                                                                                                                                                                                                                                                                                                                                                                                                                                                                                                                                                                                                                                                                                                                                                                                                                                                                                                                                                                                                                                                                                                                                                                                                                                                                                                                                                                                                                                                                                                                                                                                                                                                                                                                                                                                                                                                                                                                                                                                                                                                                                                                                                                                                                                                                                                                                                                                                                                                                                                                                                                                                                                                                                                                                                                                                                                                                                                                                                                                                                                                                                                                                                                                                                                                                                                                                                                                                                                                                                                                                                     |
| 71 | Genital tumor                     | Cancer,Organismal Injury and Abnormalities,Reproductive System Disease | 1.03E,10 | 205 | AASDHPPT,ACACB,ACADSB,ACADVL,ACBD7,ACP3,ACY1,ALB,ALK,ANG,ANXA6,AOC3,APEX1,APPL1,AR,ARF6,ARHGAP5,ARHGEF1,ASAP1,ATP7B,B2M,B3GAT2,BCR,BTK,BTRC,C1R,C8A,CA8,CANT1,CD1A,CD74,CLCN5,CLK1,CSDE1,CSF2RB,CSNK1G1,CSTF2,CTCF,CUL1,CYP17A1,CYP2E1,CYP7A1,DCTD,DHPS,DMC1,DOK2,DPP4,DTYMK,EP300,EPHA3,EPS8L2,ERBB4,ESR1,ETF1,F2,F3,FABP7,FAP,FAS,FCGR2A,FLNB,FN1,G6PD,GAD2,GALM,GALNT10,GART,GC,GGPS1,GRHPR,GRK2,GTF2I,HASPIN,HBB,HBEGF,HCK,HDAC7,HDX,HLA,DRB1,HMBOX1,HMGB3,HMOX1,HNRNPA2B1,HPD,HSD17B10,HSD17B4,HSP90AB1,HTR1A,IFNG,IFNGR1,IGF1R,IMP1,IMP2,IMP3,MAPK6,MARF1,MARK1,MATK,MDH1,MEMO1,MMP1,MMP2,MSH2,MSN,MUC1,MYBPC1,MYBPC3,MYSM1,NAE1,NBEA,NCBP1,NCOA3,NF2,NFATC1,NMRK1,NMT1,NOTCH1,NR1I3,NT5C3A,NUP214,OAT,ODC1,OXSR1,PANK1,PAPSS1,PARN,PARP3,PATJ,PC,PDK3,PDK4,PGC,PGK1,PHF24,POU2F1,PPARG,PPP2R1A,PRKCB,PSAP,PTK2B,PTPRE,PTPRF,PYGL,RAC1,RARA,RARG,RBBP6,RBM39,RGS6,RND1,RRM1,RTN4IP1,RUVBL1,S100A6,SART3,SEMA4D,SENP2,SERPINA5,SF3B6,SFMBT2,SFN,SH3YL1,SKP1,SLC5A1,SLK,SMAP1,SMG5,SMTN,SMURF2,SNX1,STK4,SUB1,SULT1A1,SYT13,TAF13,THBS2,TJP1,TLR4,TRIM21,TTR,UEVLD,USP19,UTRN,VAV3,VEGFB,WEE1,WHRN,WWP1,XIAP,YWHAQ,YY1,ZEB2,ZFP28,ZIC3,ZNF292,ZNF462                                                                                                                                                                                                                                                                                                                                                                                                                                                                                                                                                                                                                                                                                                                                                                                                                                                                                                                                                                                                                                                                                                                                                                                                                                                                                                                                                                                                                                                                                                                                                                                                                                                                                                                                                                                                                                                                                                                                                                                                                                                                                                                                                                                                                                                                                                                                                                                                                                                                                                                                                                                                                                                                                                                                                                                                                                                                                                                                                                                                                                                                                                                                                                                                                                                                                                                                                                                                                                                                                                                                                                                                                                                                                                                                                                                                                                                                                                                                                                                                                                                                                                                                                                                                                                                                                                                                                                                                                                                                                                                                                                                                                                                                                                                                                                                                                                                                                                                                                                                                                                                                                                                                                                                                                                                                                                                                                                                                                                                                                                                                                                                                                                                                                                                                                                                                                                                                                                                                                                                                                                                                                                                                                                                                                                                                                                                                                                                                                                                                                                                                                                                                                                                                                                                                                                                                               |
| 72 | Nonhematologic malignant neoplasm | Cancer,Organismal Injury and Abnormalities                             | 1.16E,10 | 284 | AASDHPPT,ACACB,ACADSB,ACADVL,ACAT2,ACBD7,ACSM2A,ACVR2B,ACY1,ADH1C,ADH7,ALB,ALK,ALOX12,AMY1C (includes others),ANG,ANXA6,AOC3,APEX1,APPL1,AR,ARF6,ARHGAP5,ARHGEF1,ASAP1,ATP7B,ATXN3,B2M,B3GAT2,B3GAT3,BCR,BMP1,BPI,BTK,BTRC,C1R,C8A,CA8,CAMK4,CANT1,CD1A,CD74,CDK5R1,CERT1,CHKA,CIAO1,CLCN5,CLK1,CRYM,CSDE1,CSF2RB,CSNK1G1,CSNK1G2,CSTF2,CTCF,CUL1,CYP17A1,CYP2E1,CYP2R1,CYP7A1,DAPK2,DCTD,DCXR,DFFA,DGKA,DHPS,DMC1,DOK2,DPP4,DSG2,DTYMK,ECHS1,ECI2,EP300,EPHA3,EPS8L2,ERBB4,ERI1,ESR1,ETF1,EXOSC9,F2,F3,FABP3,FABP7,FAP,FAS,FCGR2A,FHIT,FLNB,FN1,G6PD,GAD2,GALM,GALNT10,GART,GC,GGPS1,GRHPR,GRK2,GRK6,GSTT2/GSTT2B,GTF2F2,GTF2I,HADH,HASPIN,HAT1,HBB,HBEGF,HCK,HDAC7,HDX,HIBCH,HK2,HLA,DRB1,HMBOX1,HMGB3,HMGCS1,HMOX1,HNRNPA2B1,HPD,HSCB,HSD17B10,HSD17B4,HSP90AB1,HTR1A,IDE,IFNG,IFNGR1,IGF1R,IMP2,IMP3,IMP4,IMP5,IMP6,IMP7,IMP8,IMP9,IMP10,IMP11,IMP12,IMP13,IMP14,IMP15,IMP16,IMP17,IMP18,IMP19,IMP20,IMP21,IMP22,IMP23,IMP24,IMP25,IMP26,IMP27,IMP28,IMP29,IMP30,IMP31,IMP32,IMP33,IMP34,IMP35,IMP36,IMP37,IMP38,IMP39,IMP40,IMP41,IMP42,IMP43,IMP44,IMP45,IMP46,IMP47,IMP48,IMP49,IMP50,IMP51,IMP52,IMP53,IMP54,IMP55,IMP56,IMP57,IMP58,IMP59,IMP60,IMP61,IMP62,IMP63,IMP64,IMP65,IMP66,IMP67,IMP68,IMP69,IMP70,IMP71,IMP72,IMP73,IMP74,IMP75,IMP76,IMP77,IMP78,IMP79,IMP80,IMP81,IMP82,IMP83,IMP84,IMP85,IMP86,IMP87,IMP88,IMP89,IMP90,IMP91,IMP92,IMP93,IMP94,IMP95,IMP96,IMP97,IMP98,IMP99,IMP100,IMP101,IMP102,IMP103,IMP104,IMP105,IMP106,IMP107,IMP108,IMP109,IMP110,IMP111,IMP112,IMP113,IMP114,IMP115,IMP116,IMP117,IMP118,IMP119,IMP120,IMP121,IMP122,IMP123,IMP124,IMP125,IMP126,IMP127,IMP128,IMP129,IMP130,IMP131,IMP132,IMP133,IMP134,IMP135,IMP136,IMP137,IMP138,IMP139,IMP140,IMP141,IMP142,IMP143,IMP144,IMP145,IMP146,IMP147,IMP148,IMP149,IMP150,IMP151,IMP152,IMP153,IMP154,IMP155,IMP156,IMP157,IMP158,IMP159,IMP160,IMP161,IMP162,IMP163,IMP164,IMP165,IMP166,IMP167,IMP168,IMP169,IMP170,IMP171,IMP172,IMP173,IMP174,IMP175,IMP176,IMP177,IMP178,IMP179,IMP180,IMP181,IMP182,IMP183,IMP184,IMP185,IMP186,IMP187,IMP188,IMP189,IMP190,IMP191,IMP192,IMP193,IMP194,IMP195,IMP196,IMP197,IMP198,IMP199,IMP200,IMP201,IMP202,IMP203,IMP204,IMP205,IMP206,IMP207,IMP208,IMP209,IMP210,IMP211,IMP212,IMP213,IMP214,IMP215,IMP216,IMP217,IMP218,IMP219,IMP220,IMP221,IMP222,IMP223,IMP224,IMP225,IMP226,IMP227,IMP228,IMP229,IMP230,IMP231,IMP232,IMP233,IMP234,IMP235,IMP236,IMP237,IMP238,IMP239,IMP240,IMP241,IMP242,IMP243,IMP244,IMP245,IMP246,IMP247,IMP248,IMP249,IMP250,IMP251,IMP252,IMP253,IMP254,IMP255,IMP256,IMP257,IMP258,IMP259,IMP260,IMP261,IMP262,IMP263,IMP264,IMP265,IMP266,IMP267,IMP268,IMP269,IMP270,IMP271,IMP272,IMP273,IMP274,IMP275,IMP276,IMP277,IMP278,IMP279,IMP280,IMP281,IMP282,IMP283,IMP284,IMP285,IMP286,IMP287,IMP288,IMP289,IMP290,IMP291,IMP292,IMP293,IMP294,IMP295,IMP296,IMP297,IMP298,IMP299,IMP300,IMP301,IMP302,IMP303,IMP304,IMP305,IMP306,IMP307,IMP308,IMP309,IMP310,IMP311,IMP312,IMP313,IMP314,IMP315,IMP316,IMP317,IMP318,IMP319,IMP320,IMP321,IMP322,IMP323,IMP324,IMP325,IMP326,IMP327,IMP328,IMP329,IMP330,IMP331,IMP332,IMP333,IMP334,IMP335,IMP336,IMP337,IMP338,IMP339,IMP340,IMP341,IMP342,IMP343,IMP344,IMP345,IMP346,IMP347,IMP348,IMP349,IMP350,IMP351,IMP352,IMP353,IMP354,IMP355,IMP356,IMP357,IMP358,IMP359,IMP360,IMP361,IMP362,IMP363,IMP364,IMP365,IMP366,IMP367,IMP368,IMP369,IMP370,IMP371,IMP372,IMP373,IMP374,IMP375,IMP376,IMP377,IMP378,IMP379,IMP380,IMP381,IMP382,IMP383,IMP384,IMP385,IMP386,IMP387,IMP388,IMP389,IMP390,IMP391,IMP392,IMP393,IMP394,IMP395,IMP396,IMP397,IMP398,IMP399,IMP400,IMP401,IMP402,IMP403,IMP404,IMP405,IMP406,IMP407,IMP408,IMP409,IMP410,IMP411,IMP412,IMP413,IMP414,IMP415,IMP416,IMP417,IMP418,IMP419,IMP420,IMP421,IMP422,IMP423,IMP424,IMP425,IMP426,IMP427,IMP428,IMP429,IMP430,IMP431,IMP432,IMP433,IMP434,IMP435,IMP436,IMP437,IMP438,IMP439,IMP440,IMP441,IMP442,IMP443,IMP444,IMP445,IMP446,IMP447,IMP448,IMP449,IMP450,IMP451,IMP452,IMP453,IMP454,IMP455,IMP456,IMP457,IMP458,IMP459,IMP460,IMP461,IMP462,IMP463,IMP464,IMP465,IMP466,IMP467,IMP468,IMP469,IMP470,IMP471,IMP472,IMP473,IMP474,IMP475,IMP476,IMP477,IMP478,IMP479,IMP480,IMP481,IMP482,IMP483,IMP484,IMP485,IMP486,IMP487,IMP488,IMP489,IMP490,IMP491,IMP492,IMP493,IMP494,IMP495,IMP496,IMP497,IMP498,IMP499,IMP500,IMP501,IMP502,IMP503,IMP504,IMP505,IMP506,IMP507,IMP508,IMP509,IMP510,IMP511,IMP512,IMP513,IMP514,IMP515,IMP516,IMP517,IMP518,IMP519,IMP520,IMP521,IMP522,IMP523,IMP524,IMP525,IMP526,IMP527,IMP528,IMP529,IMP530,IMP531,IMP532,IMP533,IMP534,IMP535,IMP536,IMP537,IMP538,IMP539,IMP540,IMP541,IMP542,IMP543,IMP544,IMP545,IMP546,IMP547,IMP548,IMP549,IMP550,IMP551,IMP552,IMP553,IMP554,IMP555,IMP556,IMP557,IMP558,IMP559,IMP560,IMP561,IMP562,IMP563,IMP564,IMP565,IMP566,IMP567,IMP568,IMP569,IMP570,IMP571,IMP572,IMP573,IMP574,IMP575,IMP576,IMP577,IMP578,IMP579,IMP580,IMP581,IMP582,IMP583,IMP584,IMP585,IMP586,IMP587,IMP588,IMP589,IMP590,IMP591,IMP592,IMP593,IMP594,IMP595,IMP596,IMP597,IMP598,IMP599,IMP600,IMP601,IMP602,IMP603,IMP604,IMP605,IMP606,IMP607,IMP608,IMP609,IMP610,IMP611,IMP612,IMP613,IMP614,IMP615,IMP616,IMP617,IMP618,IMP619,IMP620,IMP621,IMP622,IMP623,IMP624,IMP625,IMP626,IMP627,IMP628,IMP629,IMP630,IMP631,IMP632,IMP633,IMP634,IMP635,IMP636,IMP637,IMP638,IMP639,IMP640,IMP641,IMP642,IMP643,IMP644,IMP645,IMP646,IMP647,IMP648,IMP649,IMP650,IMP651,IMP652,IMP653,IMP654,IMP655,IMP656,IMP657,IMP658,IMP659,IMP660,IMP661,IMP662,IMP663,IMP664,IMP665,IMP666,IMP667,IMP668,IMP669,IMP670,IMP671,IMP672,IMP673,IMP674,IMP675,IMP676,IMP677,IMP678,IMP679,IMP680,IMP681,IMP682,IMP683,IMP684,IMP685,IMP686,IMP687,IMP688,IMP689,IMP690,IMP691,IMP692,IMP693,IMP694,IMP695,IMP696,IMP697,IMP698,IMP699,IMP700,IMP701,IMP702,IMP703,IMP704,IMP705,IMP706,IMP707,IMP708,IMP709,IMP710,IMP711,IMP712,IMP713,IMP714,IMP715,IMP716,IMP717,IMP718,IMP719,IMP720,IMP721,IMP722,IMP723,IMP724,IMP725,IMP726,IMP727,IMP728,IMP729,IMP730,IMP731,IMP732,IMP733,IMP734,IMP735,IMP736,IMP737,IMP738,IMP739,IMP740,IMP741,IMP742,IMP743,IMP744,IMP745,IMP746,IMP747,IMP748,IMP749,IMP750,IMP751,IMP752,IMP753,IMP754,IMP755,IMP756,IMP757,IMP758,IMP759,IMP760,IMP761,IMP762,IMP763,IMP764,IMP765,IMP766,IMP767,IMP768,IMP769,IMP770,IMP771,IMP772,IMP773,IMP774,IMP775,IMP776,IMP777,IMP778,IMP779,IMP780,IMP781,IMP782,IMP783,IMP784,IMP785,IMP786,IMP787,IMP788,IMP789,IMP790,IMP791,IMP792,IMP793,IMP794,IMP795,IMP796,IMP797,IMP798,IMP799,IMP800,IMP801,IMP802,IMP803,IMP804,IMP805,IMP806,IMP807,IMP808,IMP809,IMP810,IMP811,IMP812,IMP813,IMP814,IMP815,IMP816,IMP817,IMP818,IMP819,IMP820,IMP821,IMP822,IMP823,IMP824,IMP825,IMP826,IMP827,IMP828,IMP829,IMP830,IMP831,IMP832,IMP833,IMP834,IMP835,IMP836,IMP837,IMP838,IMP839,IMP840,IMP841,IMP842,IMP843,IMP844,IMP845,IMP846,IMP847,IMP848,IMP849,IMP850,IMP851,IMP852,IMP853,IMP854,IMP855,IMP856,IMP857,IMP858,IMP859,IMP860,IMP861,IMP862,IMP863,IMP864,IMP865,IMP866,IMP867,IMP868,IMP869,IMP870,IMP871,IMP872,IMP873,IMP874,IMP875,IMP876,IMP877,IMP878,IMP879,IMP880,IMP881,IMP882,IMP883,IMP884,IMP885,IMP886,IMP887,IMP888,IMP889,IMP890,IMP891,IMP892,IMP893,IMP894,IMP895,IMP896,IMP897,IMP898,IMP899,IMP900,IMP901,IMP902,IMP903,IMP904,IMP905,IMP906,IMP907,IMP908,IMP909,IMP910,IMP911,IMP912,IMP913,IMP914,IMP915,IMP916,IMP917,IMP918,IMP919,IMP920,IMP921,IMP922,IMP923,IMP924,IMP925,IMP926,IMP927,IMP928,IMP929,IMP930,IMP931,IMP932,IMP933,IMP934,IMP935,IMP936,IMP937,IMP938,IMP939,IMP940,IMP941,IMP942,IMP943,IMP944,IMP945,IMP946,IMP947,IMP948,IMP949,IMP950,IMP951,IMP952,IMP953,IMP954,IMP955,IMP956,IMP957,IMP958,IMP959,IMP960,IMP961,IMP962,IMP963,IMP964,IMP965,IMP966,IMP967,IMP968,IMP969,IMP970,IMP971,IMP972,IMP973,IMP974,IMP975,IMP976,IMP977,IMP978,IMP979,IMP980,IMP981,IMP982,IMP983,IMP984,IMP985,IMP986,IMP987,IMP988,IMP989,IMP990,IMP991,IMP992,IMP993,IMP994,IMP995,IMP996,IMP997,IMP998,IMP999,IMP1000 |

|    |                     |                                                                                                   |          |     |                                                                                                                                                                                                                                                                                                                                                                                                                                                                                                                                                                                                                                                                                                                                                                                                                                                                                                                                                                                                                                                                                                                                                                                                                                                                                                                                                                                                                                                                                  |
|----|---------------------|---------------------------------------------------------------------------------------------------|----------|-----|----------------------------------------------------------------------------------------------------------------------------------------------------------------------------------------------------------------------------------------------------------------------------------------------------------------------------------------------------------------------------------------------------------------------------------------------------------------------------------------------------------------------------------------------------------------------------------------------------------------------------------------------------------------------------------------------------------------------------------------------------------------------------------------------------------------------------------------------------------------------------------------------------------------------------------------------------------------------------------------------------------------------------------------------------------------------------------------------------------------------------------------------------------------------------------------------------------------------------------------------------------------------------------------------------------------------------------------------------------------------------------------------------------------------------------------------------------------------------------|
|    |                     |                                                                                                   |          |     | PC,PCYT2,PDF,PDHA1,PDK2,PDK3,PDK4,PEX5,PGC,PGK1,PHF24,PIP4K2C,PNMT,POT1,POU2F1,PPARG,PP2R1A,PRKCB,PSAP,PTK2B,PTPRE,PTPRF,PUS10,PYGL,RAB26,RAC1,RARA,RARG,RBBP6,RBM39,RBP5,RGS6,RND1,RPA3,RRM1,RTN4IP1,RUVBL1,SART3,SEC23A,SEM1,SEMA4D,SEN2,SERPINA5,SF3B6,SFMBT2,SFN,SH2B2,SH3YL1,SKP1,SLC5A1,SLK,SMAP1,SMG5,SMG7,SMTN,SMURF2,SNX1,SNX22,SPEF1,STAR13,STK4,SUB1,SULT1A1,SYT13,TAF13,THBS2,TIMM9,TJP1,TLR4,TFNFAIP8L2,TRIM21,TTR,TXNDC12,UEVLD,USP19,UTRN,VAV3,VEGFB,VPS26A,WEE1,WHRN,WWP1,XIAP,XRCC6,YWHAH,YWHAQ,YY1,ZBTB43,ZCWPW1,ZEB2,ZFP28,ZIC3,ZNF292,ZNF462                                                                                                                                                                                                                                                                                                                                                                                                                                                                                                                                                                                                                                                                                                                                                                                                                                                                                                                 |
| 73 | Endocrine cancer    | Cancer,Endocrine System Disorders,Organismal Injury and Abnormalities                             | 1.22E,10 | 244 | AASDHPPT,ACACB,ACADSB,ACADVL,ACAT2,ACBD7,ACVR2B,ACY1,ADH7,ALK,ALOX12,AMY1C (includes others),ANXA6,AOC3,APPL1,AR,ARHGAP5,ARHGFE1,ASAP1,ATP7B,ATXN3,B2M,B3GAT2,B3GAT3,BCR,BMP1,BPI,BTK,BTRC,C8A,CA8,CANT1,CD1A,CHKA,CIAO1,CLCN5,CLK1,CRYM,CSDE1,CSF2RB,CSNK1G1,CSNK1G2,CSTF2,CTCF,CUL1,CYP17A1,CYP2E1,CYP2R1,CYP7A1,DAPK2,DCTD,DCXR,DDFA,DGKA,DHPS,DMC1,DOK2,DPP4,DSG2,DTYMK,EP300,EP300,ERBB4,ERI1,ESR1,ETF1,F2,F3,FAP,FAS,FLNB,FN1,G6PD,GAD2,GALM,GALNT10,GART,GC,GRHR,GRK2,GRK6,GSTT2/GSTT2B,GTFF2,GTFF2I,HADH,HASPIN,HAT1,HBEGF,HCK,HDAC7,HDX,HIBCH,HLA,DRB1,HMBOX1,HMGB3,HMGCS1,HMOX1,HNRNPA2B1,HPD,HSCB,HSD17B4,HSP90AB1,IDE,IFNGR1,IGF1R,IMPA2,IMPDH1,IQUB,ITGB3,ITPK1,ITPKC,ITSN1,KIF11,KLK1,KMT5A,KYNU,LRBA,MAGEA4,MAGI2,MAP3K3,MAPK6,MARF1,MARK1,MATK,MECR,MEMO1,MMP1,MMP2,MSH2,MSN,MTAP,MUC1,MYBPC1,MYBPC3,MYSM1,NAE1,NBEA,NCBP1,NCOA3,NDC80,NDUFAB1,NF2,NFATC1,NME3,NMRK1,NOTCH1,NR1I3,NT5C3A,NUP214,OAT,ODC1,OXSR1,PA2G4,PAFAH1B2,PAH,PANK1,PAPSS1,PARN,PARP3,PATJ,PC,PCYT2,PDF,PDHA1,PDK3,PDK4,PEX5,PGK1,PHF24,PIP4K2C,PNMT,POT1,POU2F1,PPARG,PPP2R1A,PRKCB,PSAP,PTK2B,PTPRE,PTPRF,PYGL,RAB26,RAC1,RARA,RARG,RBBP6,RBM39,RGS6,RND1,RPA3,RRM1,RTN4IP1,RUVBL1,SART3,SEC23A,SEM1,SEMA4D,SEN2,SERPINA5,SFMBT2,SH2B2,SH3YL1,SKP1,SLC5A1,SLK,SMAP1,SMG5,SMG7,SMTN,SMURF2,SNX1,SNX22,SPEF1,STAR13,STK4,SUB1,SULT1A1,SYT13,TAF13,THBS2,TJP1,TLR4,TRIM21,TTR,TXNDC12,UEVLD,USP19,UTRN,VAV3,VPS26A,WEE1,WHRN,WWP1,XRCC6,YWHAQ,YY1,ZBTB43,ZCWPW1,ZEB2,ZFP28,ZIC3,ZNF292,ZNF462 |
| 74 | Clear cell neoplasm | Cancer,Organismal Injury and Abnormalities                                                        | 1.37E,10 | 53  | ACACB,ALB,ALK,AR,ASAP1,ATXN3,BTRC,CANT1,CSF2RB,CTCF,CYP17A1,ECHS1,EP300,EPAH3,ERBB4,FAP,FN1,GAD2,GRHR,HBB,HLA,DRB1,HSD17B4,HSP90AB1,IGF1R,IMPDH1,ITGB3,KIF11,KLK1,MMP2,MUC1,MYBPC1,NCOA3,NF2,NOTCH1,NR1I3,NUP214,PANK1,PARP3,PDK4,PPP2R1A,PTPRE,PYGL,RARA,RBP5,RRM1,SMG7,SMTN,SULT1A1,TJP1,TLR4,ZCWPW1,ZNF292,ZNF462                                                                                                                                                                                                                                                                                                                                                                                                                                                                                                                                                                                                                                                                                                                                                                                                                                                                                                                                                                                                                                                                                                                                                             |
| 75 | Gonadal tumor       | Cancer,Endocrine System Disorders,Organismal Injury and Abnormalities,Reproductive System Disease | 1.38E,10 | 82  | ALB,ALK,ANG,AOC3,AR,ARF6,ARHGFE1,ASAP1,B2M,BCR,CA8,CD74,CLK1,CSF2RB,CSNK1G1,CSTF2,CTCF,DPP4,EP300,EPAH3,ESR1,F2,FAP,FAS,FN1,GAD2,GART,GC,HBEGF,HCK,HNRNPA2B1,HSP90AB1,HTR1A,IFNGR1,IMPDH1,ITPA,ITSN1,MAGEA4,MAGI2,MAP3K3,MMP1,MMP2,MSH2,MUC1,NBEA,NCOA3,NF2,NOTCH1,NR1I3,NT5C3A,ODC1,PARP3,PC,PDK4,PGC,POU2F1,PPARG,PPP2R1A,PRKCB,PTPRF,PYGL,RAC1,RARG,RBM39,RRM1,RTN4IP1,SERPINA5,SFMBT2,SH3YL1,SKP1,SMTN,SYT13,TAF13,THBS2,TLR4,TTR,UTRN,VAV3,VEGFB,WWP1,XIAP,ZEB2                                                                                                                                                                                                                                                                                                                                                                                                                                                                                                                                                                                                                                                                                                                                                                                                                                                                                                                                                                                                             |
| 76 | Signal transduction | Cell,To,Cell Signaling and Interaction                                                            | 1.39E,10 | 47  | ACVR2B,ALK,APPL1,AR,ARHGFE1,BCR,BTK,BTRC,CAMK4,CSNK1G2,DAPK2,DOK2,ERBB4,ESR1,F2,FAS,FLNB,GRK2,GRK6,HASPIN,HBEGF,HLA,DRB1,HMOX1,HTR1A,IFNG,IFNGR1,IGF1R,ITPK1,ITSN1,MAP3K3,MAPK6,MARK1,NAE1,NFATC1,NR1I3,OXSR1,PPARG,PSAP,PTK2B,RAC1,RARA,RGS6,S100A6,SFN,STK4,THBS2,VAV3                                                                                                                                                                                                                                                                                                                                                                                                                                                                                                                                                                                                                                                                                                                                                                                                                                                                                                                                                                                                                                                                                                                                                                                                         |
| 77 | Incidence of tumor  | Cancer,Organismal Injury and Abnormalities                                                        | 1.51E,10 | 238 | AASDHPPT,ACACB,ACADSB,ACADVL,ACBD7,ACY1,ADH1C,ADH7,ALB,ALK,ALOX12,AOC3,APEX1,APPL1,AR,ARF6,ARHGAP5,ARHGFE1,ASAP1,ATP7B,ATXN3,B2M,B3GAT2,BCR,BMP1,BPI,BTK,BTRC,C1R,C8A,CA8,CAMK4,CANT1,CD1A,CDK5R1,CERT1,CHKA,CLCN5,CLK1,CSDE1,CSF2RB,CSNK1G1,CSNK1G2,CSTF2,CTCF,CUL1,CYP17A1,CYP2E1,CYP7A1,DAPK2,DCTD,DCXR,DDFA,DGKA,DHPS,DMC1,DOK2,DPP4,DSG2,DTYMK,ECHS1,EP300,EPAH3,ERBB4,ESR1,ETF1,EXOSC9,F2,F3,FABP3,FABP7,FAP,FAS,FCGR2A,PHIT,FLNB,FN1,G6PD,GAD2,GALNT10,GART,GGPS1,GRHR,GRK2,GRK6,GTFF2I,HASPIN,HBB,HBEGF,HCK,HDAC7,HDX,HIBCH,HLA,DRB1,HMBOX1,HMGB3,HMOX1,HNRNPA2B1,HPD,HSD17B10,HSD17B4,HSP90AB1,HTR1A,IDE,IFNG,IFNGR1,IGF1R,IMPDH1,IQUB,ITGB3,ITPA,ITPKC,ITSN1,KIF11,KLK1,KMT5A,KYNU,LRBA,MAGEA4,MAGI2,MAP3K3,MAPK6,MARF1,MARK1,MATK,MDH1,MEMO1,MMP1,MMP2,MSH2,MSN,M                                                                                                                                                                                                                                                                                                                                                                                                                                                                                                                                                                                                                                                                                                     |

|    |                                    |                                                                                        |          |     |                                                                                                                                                                                                                                                                                                                                                                                                                                                                                                                                                                                                                                                                                                                                                                                                                                                                                                                                                                                                                                                                                                                                                                                                                                                                                                                                                                                                                                                                                                                                                                                                                                                                                                                                           |
|----|------------------------------------|----------------------------------------------------------------------------------------|----------|-----|-------------------------------------------------------------------------------------------------------------------------------------------------------------------------------------------------------------------------------------------------------------------------------------------------------------------------------------------------------------------------------------------------------------------------------------------------------------------------------------------------------------------------------------------------------------------------------------------------------------------------------------------------------------------------------------------------------------------------------------------------------------------------------------------------------------------------------------------------------------------------------------------------------------------------------------------------------------------------------------------------------------------------------------------------------------------------------------------------------------------------------------------------------------------------------------------------------------------------------------------------------------------------------------------------------------------------------------------------------------------------------------------------------------------------------------------------------------------------------------------------------------------------------------------------------------------------------------------------------------------------------------------------------------------------------------------------------------------------------------------|
|    |                                    |                                                                                        |          |     | TAP,MUC1,MYBPC1,MYBPC3,MYSM1,NAE1,NBEA,NCBP1,NCOA3,NDC80,NF2,NFATC1,NMRK1,NMT1,NOTCH1,NR1I3,NT5C3A,NUP214,OAT,ODC1,OXSR1,PA2G4,PAH,PANK1,PAPSS1,PARN,PARP3,PATJ,PC,PCYT2,PDK3,PDK4,PEX5,PGC,PGK1,PHF24,PIP4K2C,POU2F1,PPARG,PPP2R1A,PRKCB,PTK2B,PTPRE,PTPRF,PUS10,PYGL,RAC1,RARA,RARG,RBBP6,RBM39,RBP5,RGS6,RND1,RRM1,RTN4IP1,RUVBL1,S100A6,SART3,SEC23A,SEMA4D,SENP2,SERPINA5,SF3B6,SFMBT2,SFN,SH2B2,SH3YL1,SKP1,SLC5A1,SLK,SMAP1,SMG5,SMG7,SMTN,SMURF2,SNX1,SPEF1,STARD13,STK16,STK4,SUB1,SULT1A1,SYT13,TAF13,THBS2,TJP1,TLR4,TRIM21,TTR,UEVLD,USP19,UTRN,VAV3,VEGFB,WEE1,WHRN,WWP1,XIAP,XRCC6,YY1,ZCWPW1,ZEB2,ZFP28,ZIC3,ZNF292,ZNF462                                                                                                                                                                                                                                                                                                                                                                                                                                                                                                                                                                                                                                                                                                                                                                                                                                                                                                                                                                                                                                                                                                 |
| 78 | Metastatic carcinoma               | Cancer,Organismal Injury and Abnormalities                                             | 1.53E,10 | 22  | ALB,ALK,AR,B2M,CYP17A1,ERBB4,ESR1,F3,FAS,FN1,GART,GGPS1,HSP90AB1,IGF1R,MMP2,MUC1,NR1I3,PARP3,PGC,PTK2B,RAC1,RRM1                                                                                                                                                                                                                                                                                                                                                                                                                                                                                                                                                                                                                                                                                                                                                                                                                                                                                                                                                                                                                                                                                                                                                                                                                                                                                                                                                                                                                                                                                                                                                                                                                          |
| 79 | Cell death of cancer cells         | Cancer,Cell Death and Survival,Organismal Injury and Abnormalities,Tumor Morphology    | 1.55E,10 | 19  | ALB,AR,ATP7B,B2M,BTK,CD74,FAS,FHIT,GRK6,HMOX1,IFNG,IGF1R,MUC1,NCOA3,PPARG,PTK2B,RAC1,RARA,XIAP                                                                                                                                                                                                                                                                                                                                                                                                                                                                                                                                                                                                                                                                                                                                                                                                                                                                                                                                                                                                                                                                                                                                                                                                                                                                                                                                                                                                                                                                                                                                                                                                                                            |
| 80 | Mature T,cell or NK,cell neoplasm  | Cancer,Hematological Disease,Organismal Injury and Abnormalities                       | 1.65E,10 | 36  | ALK,B2M,C1R,CD1A,CLK1,CTCF,DPP4,EP300,EPHA3,ERBB4,FAS,FHIT,FN1,GTF2I,HCK,HDAC7,HNRNPA2B1,HSP90AB1,IMPDH1,MMP1,MMP2,MUC1,NFATC1,NOTCH1,NT5C3A,ODC1,POT1,POU2F1,PRKCB,PTPRE,RARA,RARG,RRM1,TAF13,TJP1,TLR4                                                                                                                                                                                                                                                                                                                                                                                                                                                                                                                                                                                                                                                                                                                                                                                                                                                                                                                                                                                                                                                                                                                                                                                                                                                                                                                                                                                                                                                                                                                                  |
| 81 | Malignant solid tumor              | Cancer,Organismal Injury and Abnormalities                                             | 1.74E,10 | 286 | AASDHPPT,ACACB,ACADSB,ACADVL,ACAT2,ACBD7,ACP3,ACSM2A,ACVR2B,ACY1,ADH1C,ADH7,ALB,ALK,ALOX12,AMY1C (includes others),ANG,ANXA6,AOC3,APEX1,APPL1,AR,ARF6,ARHGAP5,ARHGEF1,ASAP1,ATP7B,ATXN3,B2M,B3GAT2,B3GAT3,BCR,BMP1,BPI,BTK,BTRC,C1R,C8A,CA8,CAMK4,CANT1,CD1A,CD74,CDK5R1,CERT1,CHKA,CIL101,CLCN5,CLK1,CRYM,CSDE1,CSF2RB,CSNK1G1,CSNK1G2,CSTF2,CTCF,CUL1,CYP17A1,CYP2E1,CYP2R1,CYP7A1,DAPK2,DCTD,DCXR,DFFA,DGKA,DHPS,DMC1,DOK2,DPP4,DSG2,DTYMK,ECHS1,ECI2,EP300,EPHA3,EPS8L2,ERBB4,ERI1,ESR1,ETF1,EXOSC9,F2,F3,FABP3,FABP7,FAP,FAS,FCGR2A,FHIT,FLNB,FN1,G6PD,GAD2,GALM,GALNT10,GART,GC,GGPS1,GRHPR,GRK2,GRK6,GSTT2/GSTT2B,GTF2F2,GTF2I,HADH,HASPIN,HAT1,HBB,HBEGF,HCK,HDAC7,HDX,HIBCH,HK2,HLA,DRB1,HMBOX1,HMGB3,HMGCS1,HMOX1,HNRNPA2B1,HPD,HSCB,HSD17B10,HSD17B4,HSP90AB1,HTR1A,IDE,IFNG,IFNGR1,IGF1R,IMPA2,IMPDH1,IQUB,ITGB3,ITPA,ITPK1,ITPKC,ITSN1,KIF11,KLK1,KMT5A,KYNU,LRBA,MAGEA4,MAGI2,MAP3K3,MAPK6,MARF1,MARK1,MATK,MDH1,MECR,MEMO1,MMP1,MMP2,MSH2,MSN,MTAP,MUC1,MYBPC1,MYBPC3,MYSM1,NAE1,NBEA,NCBP1,NCOA3,NDC80,NDUFAB1,NF2,NFATC1,NME3,NMRK1,NMT1,NOTCH1,NR1I3,NSUN5,NT5C3A,NUP214,OAT,ODC1,OXSR1,PA2G4,PAFAH1B2,PAH,PANK1,PAPSS1,PARN,PARP3,PATJ,PC,PCYT2,PDF,PDHA1,PDK2,PDK3,PDK4,PEX5,PGC,PGK1,PHF24,PIP4K2C,PNMT,POT1,POU2F1,PPARG,PPP2R1A,PRKCB,PSAP,PTK2B,PTPRE,PTPRF,PUS10,PYGL,RAB26,RAC1,RARA,RARG,RBBP6,RBM39,RBP5,RGS6,RND1,RPA3,RRM1,RTN4IP1,RUVBL1,S100A6,SART3,SEC23A,SEM1,SEMA4D,SENP2,SERPINA5,SF3B6,SFMBT2,SFN,SH2B2,SH3YL1,SKP1,SLC5A1,SLK,SMAP1,SMG5,SMG7,SMTN,SMURF2,SNX1,SNX22,SPEF1,STARD13,STK16,STK4,SUB1,SULT1A1,SYT13,TAF13,THBS2,TIMM9,TJP1,TLR4,TNFAIP8L2,TRIM21,TTR,TXNDC12,UEVLD,USP19,UTRN,VAV3,VEGFB,VPS26A,WEE1,WHRN,WWP1,XIAP,XRCC6,YWHAH,YWHAQ,YY1,ZBTB43,ZCWPW1,ZEB2,ZFP28,ZIC3,ZNF292,ZNF462 |
| 82 | Cell viability of tumor cell lines | Cell Death and Survival                                                                | 1.75E,10 | 53  | ACVR2B,ALB,ALK,ALOX12,APEX1,AR,ATP7B,BCR,BTK,BTRC,CHKA,DGKA,DOK2,DPP4,EP300,ERBB4,ESR1,FAS,FHIT,FN1,GRK2,GRK6,HBB,HBEGF,HCK,HK2,HMOX1,HSP90AB1,IFNG,IGF1R,ITGB3,KIF11,MSH2,NAE1,NDC80,NME3,NOTCH1,NT5C3A,PDHA1,PPP2R1A,PTK2B,PTPRE,RAC1,RBM39,RRM1,RUVBL1,S100A6,SEM1,SFN,TRIM21,WEE1,XIAP,XRCC6                                                                                                                                                                                                                                                                                                                                                                                                                                                                                                                                                                                                                                                                                                                                                                                                                                                                                                                                                                                                                                                                                                                                                                                                                                                                                                                                                                                                                                          |
| 83 | B,cell non,Hodgkin lymphoma        | Cancer,Hematological Disease,Immunological Disease,Organismal Injury and Abnormalities | 1.93E,10 | 51  | ALK,ANXA6,ARHGEF1,ATXN3,B2M,BCR,BTK,CLK1,CSDE1,CSF2RB,CSTF2,CTCF,DGKA,ECI2,EP300,EPHA3,ERBB4,FAS,FCGR2A,FN1,GTF2I,HAT1,HDAC7,HMOX1,HSP90AB1,IFNG,IMPDH1,IQUB,ITGB3,MMP2,NCBP1,NFATC1,NOTCH1,PC,PGK1,POT1,PRKCB,PTK2B,PTPRE,PTPRF,RAC1,RRM1,SEM1,SLC5A1,SNX1,THBS2,TXNDC12,VAV3,XIAP,XRCC6,ZNF292                                                                                                                                                                                                                                                                                                                                                                                                                                                                                                                                                                                                                                                                                                                                                                                                                                                                                                                                                                                                                                                                                                                                                                                                                                                                                                                                                                                                                                          |
| 84 | Breast or gynecological cancer     | Cancer,Organismal Injury and                                                           | 2.01E,10 | 194 | AASDHPPT,ACACB,ACADSB,ACBD7,ACY1,ALB,ALK,ANG,AOC3,APPL1,AR,ARF6,ARHGEF1,ASAP1,ATP7B,B2M,B3GAT2,BCR,BMP1,BTK,BTRC,C8A,CA8,CAMK4,CANT1,CD1A,CD74,CERT1,CLCN5,CLK1,CSDE1,                                                                                                                                                                                                                                                                                                                                                                                                                                                                                                                                                                                                                                                                                                                                                                                                                                                                                                                                                                                                                                                                                                                                                                                                                                                                                                                                                                                                                                                                                                                                                                    |

|    |                                 |                                                                                                      |          |     |                                                                                                                                                                                                                                                                                                                                                                                                                                                                                                                                                                                                                                                                                                                                                                                                                                                                                                                                                                                                                                                                                                                                                                                                                                                                                                                                                                                                                                                                                                                                                                                                                                     |
|----|---------------------------------|------------------------------------------------------------------------------------------------------|----------|-----|-------------------------------------------------------------------------------------------------------------------------------------------------------------------------------------------------------------------------------------------------------------------------------------------------------------------------------------------------------------------------------------------------------------------------------------------------------------------------------------------------------------------------------------------------------------------------------------------------------------------------------------------------------------------------------------------------------------------------------------------------------------------------------------------------------------------------------------------------------------------------------------------------------------------------------------------------------------------------------------------------------------------------------------------------------------------------------------------------------------------------------------------------------------------------------------------------------------------------------------------------------------------------------------------------------------------------------------------------------------------------------------------------------------------------------------------------------------------------------------------------------------------------------------------------------------------------------------------------------------------------------------|
|    |                                 | Abnormalities, Reproductive System Disease                                                           |          |     | CSF2RB, CSNK1G1, CSTF2, CTCF, CUL1, CYP17A1, CYP2E1, CYP7A1, DAPK2, DCTD, DHPS, DMC1, DOK2, DPP4, DTYMK, EP300, EPHA3, ERBB4, ESR1, ETF1, EXOSC9, F2, F3, FABP7, FAP, FAS, FCGR2A, FLNB, FN1, G6PD, GAD2, GALNT10, GART, GC, GGPS1, GRHRP, GRK2, GRK6, GTF2I, HAT1, HBB, HBEGF, HCK, HDAC7, HDX, HLA, DRB1, HMBOX1, HMGB3, HMGCS1, HMOX1, HNRNPA2B1, HPD, HSD17B4, HSP90AB1, HTR1A, IFNGR1, IGF1R, IMPDH1, IQUB, ITGB3, ITPA, ITPKC, ITSN1, KIF11, KMT5A, LRBA, MAGEA4, MAGI2, MAP3K3, MAPK6, MARF1, MARK1, MDH1, MEMO1, MMP1, MMP2, MSH2, MSN, MUC1, MYBPC3, MYSM1, NAE1, NBEA, NCBP1, NCOA3, NDC80, NF2, NFATC1, NMRK1, NMT1, NOTCH1, NR1I3, NT5C3A, NUP214, OAT, ODC1, OXSR1, PAFAH1B2, PANK1, PARN, PARP3, PATJ, PC, PDK3, PDK4, PGC, PGK1, PHF24, POU2F1, PPARG, PPP2R1A, PRKCB, PTPRE, PTPRF, PYGL, RAC1, RARA, RARG, RBBP6, RBM39, RGS6, RND1, RRM1, RTN4IP1, RUVBL1, S100A6, SART3, SENP2, SERPINA5, SF3B6, SFMBT2, SH3YL1, SKP1, SLC5A1, SLK, SMG5, SMG7, SMTN, SMURF2, SNX1, STK4, SUB1, SULT1A1, SYT13, THBS2, TJP1, TLR4, TRIM21, TTR, UEVLD, USP19, UTRN, VAV3, WEE1, WWP1, XIAP, YWHAQ, YY1, ZEB2, ZFP28, ZIC3, ZNF292, ZNF462                                                                                                                                                                                                                                                                                                                                                                                                                                                                                        |
| 85 | T, cell non, Hodgkin lymphoma   | Cancer, Hematological Disease, Immunological Disease, Organismal Injury and Abnormalities            | 2.10E,10 | 34  | ALK, B2M, C1R, CD1A, CLK1, CTCF, DPP4, EP300, EPHA3, ERBB4, FAS, FHIT, FN1, GTF2I, HCK, HDAC7, HNRNPA2B1, HSP90AB1, IMPDH1, MMP1, MMP2, MUC1, NFATC1, NOTCH1, NT5C3A, ODC1, POT1, POU2F1, PRKCB, RARA, RARG, RRM1, TJP1, TLR4                                                                                                                                                                                                                                                                                                                                                                                                                                                                                                                                                                                                                                                                                                                                                                                                                                                                                                                                                                                                                                                                                                                                                                                                                                                                                                                                                                                                       |
| 86 | Ovarian tumor                   | Cancer, Endocrine System Disorders, Organismal Injury and Abnormalities, Reproductive System Disease | 2.11E,10 | 79  | ALB, ALK, ANG, AOC3, AR, ARF6, ARHGEF1, ASAP1, B2M, BCR, CA8, CD74, CLK1, CSF2RB, CSNK1G1, CSTF2, CTCF, DPP4, EP300, EPHA3, ESR1, F2, FAP, FAS, FN1, GAD2, GART, GC, HBEGF, HCK, HNRNPA2B1, HSP90AB1, HTR1A, IFNGR1, IMPDH1, ITPA, ITSN1, MAGEA4, MAGI2, MAP3K3, MMP1, MMP2, MSH2, MUC1, NBEA, NCOA3, NF2, NOTCH1, NR1I3, NT5C3A, ODC1, PARP3, PC, PDK4, PGC, POU2F1, PPARG, PPP2R1A, PRKCB, PTPRF, PYGL, RBM39, RRM1, RTN4IP1, SERPINA5, SFMBT2, SH3YL1, SKP1, SMTN, SYT13, THBS2, TLR4, TTR, UTRN, VAV3, VEGFB, WWP1, XIAP, ZEB2                                                                                                                                                                                                                                                                                                                                                                                                                                                                                                                                                                                                                                                                                                                                                                                                                                                                                                                                                                                                                                                                                                  |
| 87 | Recurrent malignant solid tumor | Cancer, Organismal Injury and Abnormalities                                                          | 2.23E,10 | 20  | ALB, ALK, AR, BTK, CSF2RB, CYP17A1, ERBB4, ESR1, F3, GART, HDAC7, HSP90AB1, IGF1R, IMPDH1, ODC1, PARP3, PTK2B, RARA, RARG, RRM1                                                                                                                                                                                                                                                                                                                                                                                                                                                                                                                                                                                                                                                                                                                                                                                                                                                                                                                                                                                                                                                                                                                                                                                                                                                                                                                                                                                                                                                                                                     |
| 88 | Frequency of tumor              | Cancer, Organismal Injury and Abnormalities                                                          | 2.31E,10 | 234 | AASDHPPT, ACACB, ACADSB, ACADVL, ACBD7, ACY1, ADH1C, ADH7, ALB, ALK, ALOX12, AOC3, APEX1, APPL1, AR, ARF6, ARHGAP5, ARHGEF1, ASAP1, ATP7B, ATXN3, B2M, B3GAT2, BCR, BMP1, BPI, BTK, BTRC, C1R, C8A, CA8, CAMK4, CANT1, CD1A, CDK5R1, CERT1, CHKA, CLCN5, CLK1, CSDE1, CSF2RB, CSNK1G1, CSNK1G2, CSTF2, CTCF, CUL1, CYP17A1, CYP2E1, CYP7A1, DAPK2, DCTD, DCXR, DFFA, DGKA, DHPS, DOK2, DPP4, DSG2, DTYMK, ECHS1, EP300, EPHA3, ERBB4, ESR1, ETF1, EXOSC9, F2, F3, FABP3, FABP7, FAP, FAS, FCGR2A, FHIT, FLNB, FN1, G6PD, GAD2, GALNT10, GART, GGPS1, GRHRP, GRK2, GRK6, GTF2I, HSPIN, HBB, HBEGF, HCK, HDAC7, HDX, HIBCH, HLA, DRB1, HMBOX1, HMGB3, HNRNPA2B1, HPD, HSD17B4, HSP90AB1, HTR1A, IDE, IFNG, IFNGR1, IGF1R, IMPDH1, IQUB, ITGB3, ITPA, ITPKC, ITSN1, KIF11, KLK1, KMT5A, KYNU, LRBA, MAGEA4, MAGI2, MAP3K3, MAPK6, MARF1, MARK1, MATK, MDH1, MEMO1, MMP1, MMP2, MSH2, MSN, MTAP, MUC1, MYBPC1, MYBPC3, MYSM1, NAE1, NBEA, NCBP1, NCOA3, NDC80, NF2, NFATC1, NMRK1, NMT1, NOTCH1, NR1I3, NT5C3A, NUP214, OAT, ODC1, OXSR1, PA2G4, PAH, PANK1, PAPSS1, PARN, PARP3, PATJ, PC, PCYT2, PDK3, PDK4, PEX5, PGC, PGK1, PHF24, PIP4K2C, POU2F1, PPARG, PPP2R1A, PRKCB, PTK2B, PTPRE, PTPRF, PUS10, PYGL, RAC1, RARA, RARG, RBBP6, RBM39, RBP5, RGS6, RND1, RRM1, RTN4IP1, RUVBL1, SART3, SEC23A, SEMA4D, SENP2, SERPINA5, SF3B6, SFMBT2, SFN, SH2B2, SH3YL1, SKP1, SLC5A1, SLK, SMAP1, SMG5, SMG7, SMTN, SMURF2, SNX1, SPEF1, STARD13, STK16, STK4, SUB1, SULT1A1, SYT13, TAF13, THBS2, TJP1, TLR4, TRIM21, TTR, UEVLD, USP19, UTRN, VAV3, VEGFB, WEE1, WHRN, WWP1, XIAP, XRCC6, YY1, ZCWPW1, ZEB2, ZFP28, ZIC3, ZNF292, ZNF462 |
| 89 | Breast or pancreatic cancer     | Cancer, Organismal Injury and Abnormalities                                                          | 2.34E,10 | 160 | ACACB, ACAT2, ALB, ALK, ANG, AOC3, APPL1, AR, ARF6, ARHGEF1, ASAP1, ATP7B, B2M, BCR, BMP1, BPI, BTK, BTRC, CA8, CAMK4, CANT1, CD74, CDK5R1, CERT1, CHKA, CLK1, CRYM, CSDE1, CSF2RB, CSNK1G1, CSTF2, CTCF, CYP17A1, CYP2E1, DAPK2, DCTD, DFFA, DPP4, EP300, EPHA3, ERBB4, ESR1, EXOSC9, F2, F3, FABP7, FAP, FAS, FLNB, FN1, GAD2, GALNT10, GART, GC, GGPS1, GRHRP, GRK2, GRK6, GTF2I, HAT1, HBB, HBEGF, HCK, HDAC7, HLA, DRB1, HMGCS1, HMOX1, HNRNPA2B1, HPD, HSP90AB1, HTR1A, IFNGR1, IGF1R, IMPDH1, ITGB3, ITPA, ITPKC, ITSN1, KIF11, KMT5A, LRBA, MAGEA4, MAGI2, MAP3K3, MAPK6, MARF1, MARK1, MMP1, MMP2, MSH2, MSN, MUC1, MYBPC1, MYBPC3, NAE1, NBEA, NCOA3, NDC80, NF2, NFATC1, NOTCH1, NR1I3, NT5C3A, NUP214, ODC1, OXSR1, PA2G4, PAFAH1B2, PARP3, PC, PDHA1, PDK3, PDK4, PGC, PGK1, PHF24, POT1, POU2F1, PPARG, PPP2R1A, PRKCB, PTPRE, PTPRF, PYGL, RAC1, RARA, RARG, RBBP6, RBM39, RRM1, RTN4IP1, S100A6, SENP2, SERP                                                                                                                                                                                                                                                                                                                                                                                                                                                                                                                                                                                                                                                                                                        |

|    |                                      |                                                                                        |          |     |                                                                                                                                                                                                                                                                                                                                                                                                                                                                                                                                                                                                                                                                                                                                                                                                                                                                                                                                                                                                                                                                                                                                                                                                                                                                                                                                                                                                                                                                                       |
|----|--------------------------------------|----------------------------------------------------------------------------------------|----------|-----|---------------------------------------------------------------------------------------------------------------------------------------------------------------------------------------------------------------------------------------------------------------------------------------------------------------------------------------------------------------------------------------------------------------------------------------------------------------------------------------------------------------------------------------------------------------------------------------------------------------------------------------------------------------------------------------------------------------------------------------------------------------------------------------------------------------------------------------------------------------------------------------------------------------------------------------------------------------------------------------------------------------------------------------------------------------------------------------------------------------------------------------------------------------------------------------------------------------------------------------------------------------------------------------------------------------------------------------------------------------------------------------------------------------------------------------------------------------------------------------|
|    |                                      |                                                                                        |          |     | INA5,SFMBT2,SFN,SH3YL1,SKP1,SLC5A1,SLK,SMG7,SMTN,SMURF2,SYT13,THBS2,TJP1,TLR4,TTR,USP19,UTRN,VAV3,WEE1,WWP1,XIAP,YWHAQ,YY1,ZEB2,ZFP28,ZNF292,ZNF462                                                                                                                                                                                                                                                                                                                                                                                                                                                                                                                                                                                                                                                                                                                                                                                                                                                                                                                                                                                                                                                                                                                                                                                                                                                                                                                                   |
| 90 | Advanced stage carcinoma             | Cancer,Organismal Injury and Abnormalities                                             | 2.60E,10 | 26  | ALB,ALK,AR,B2M,BCR,CYP17A1,DPP4,ERBB4,ESR1,F3,FAS,FN1,GART,GGPS1,HSP90AB1,IGF1R,MMP2,MUC1,NR1I3,PARP3,PGC,PTK2B,RRM1,SKP1,VAV3,VEGFB                                                                                                                                                                                                                                                                                                                                                                                                                                                                                                                                                                                                                                                                                                                                                                                                                                                                                                                                                                                                                                                                                                                                                                                                                                                                                                                                                  |
| 91 | Mature T,cell neoplasm               | Cancer,Hematological Disease,Immunological Disease,Organismal Injury and Abnormalities | 2.68E,10 | 35  | ALK,B2M,C1R,CD1A,CLK1,CTCF,DPP4,EP300,EPAH3,ERBB4,FAS,FHIT,FN1,GTF2I,HCK,HDAC7,HNRNPA2B1,HSP90AB1,MMP1,MMP2,MUC1,NFATC1,NOTCH1,NT5C3A,ODC1,POT1,POU2F1,PRKCB,PTPRE,RARA,RRM1,ARG,RRM1,TAF13,TJP1,TLR4                                                                                                                                                                                                                                                                                                                                                                                                                                                                                                                                                                                                                                                                                                                                                                                                                                                                                                                                                                                                                                                                                                                                                                                                                                                                                 |
| 92 | Endocrine gland tumor                | Cancer,Endocrine System Disorders,Organismal Injury and Abnormalities                  | 2.70E,10 | 245 | AASDHPPT,ACACB,ACADSB,ACADVL,ACAT2,ACBD7,ACVR2B,ACY1,ADH7,ALK,ALOX12,AMY1C (includes others),ANXA6,AOC3,APPL1,AR,ARHGAP5,ARHGEF1,ASAP1,ATP7B,ATXN3,B2M,B3GAT2,B3GAT3,BCR,BMP1,BPI,BTK,BTRC,C8A,CA8,CANT1,CD1A,CHKA,CIAO1,CLCN5,CLK1,CRYM,CSDE1,CSF2RB,CSNK1G1,CSNK1G2,CSTF2,CTCF,CUL1,CYP17A1,CYP2E1,CYP2R1,CYP7A1,DAPK2,DCTD,DCXR,DDFA,DGKA,DHPS,DMC1,DOK2,DPP4,DSG2,DTYMK,EP300,EP300,ERBB4,ERI1,ESR1,ETF1,F2,F3,FABP3,FAP,FAS,FLNB,FN1,G6PD,GAD2,GALM,GALNT10,GART,GC,GRHPR,GRK2,GRK6,GSTT2/GSTT2B,GTF2F2,GTF2I,HADH,HASPIN,HAT1,HBEGF,HCK,HDAC7,HDX,HIBCH,HK2,HLA,DRB1,HMBOX1,HMGB3,HMGCS1,HMOX1,HNRNPA2B1,HPD,HSCB,HSD17B4,HSP90AB1,IDE,IFNGR1,IGF1R,IMPA2,IMPDH1,IQUB,ITGB3,ITPK1,ITPKC,ITSN1,KIF11,KLK1,KMT5A,KYNU,LRBA,MAGEA4,MAGI2,MAP3K3,MAPK6,MARF1,MARK1,MATK,MECR,MEMO1,MMP1,MMP2,MSH2,MSN,MTAP,MUC1,MYBPC1,MYBPC3,MYSM1,NAE1,NBEA,NCBP1,NCOA3,NDC80,NDFAB1,NF2,NFATC1,NME3,NMRK1,NOTCH1,NR1I3,NT5C3A,NUP214,OAT,ODC1,OXSR1,PA2G4,PAFAH1B2,PAH,PANK1,PAPSS1,PARN,PARP3,PATJ,PC,PCYT2,PDF,PDHA1,PK3,PK4,PEX5,PGK1,PHF24,PIP4K2C,PNMT,POT1,POU2F1,PPARG,PPP2R1A,PRKCB,PPAR,PTK2B,PTPRE,PTPRF,PYGL,RAB26,RAC1,RARA,RARG,RBBP6,RBM39,RGS6,RND1,RPA3,RRM1,RTN4IP1,RUVBL1,SART3,SEC23A,SEMA4D,SENP2,SERPINA5,SFMBT2,SH2B2,SH3YL1,SKP1,SLC5A1,SLK,SMAP1,SMG5,SMG7,SMTN,SMURF2,SNX1,SNX22,SPEF1,STARD13,STK4,SUB1,SULT1A1,SYT13,TAF13,THBS2,TJP1,TLR4,TRIM21,TTR,TXNDC12,UEVLD,USP19,UTRN,VAV3,VPS26A,WEE1,WHRN,WWP1,XRCC6,YWHAQ,YY1,ZBTB43,ZCWPW1,ZEB2,ZFP28,ZIC3,ZNF292,ZNF462 |
| 93 | Tumorigenesis of epithelial neoplasm | Cancer,Organismal Injury and Abnormalities                                             | 2.74E,10 | 233 | AASDHPPT,ACACB,ACADSB,ACADVL,ACBD7,ACY1,ADH1C,ADH7,ALB,ALK,ALOX12,AOC3,APEX1,APPL1,AR,ARF6,ARHGAP5,ARHGEF1,ASAP1,ATP7B,ATXN3,B2M,B3GAT2,BCR,BMP1,BPI,BTK,BTRC,C1R,C8A,CA8,CAMK4,CANT1,CD1A,CDK5R1,CERT1,CHKA,CLCN5,CLK1,CSDE1,CSF2RB,CSNK1G1,CSNK1G2,CSTF2,CTCF,CUL1,CYP17A1,CYP2E1,CYP7A1,DAPK2,DCTD,DCXR,DDFA,DGKA,DHPS,DOK2,DPP4,DSG2,DTYMK,ECHS1,EP300,EPAH3,ERBB4,ESR1,ETF1,EXOSC9,F2,F3,FABP3,FABP7,FAP,FAS,FCGR2A,FHIT,FLNB,FN1,G6PD,GAD2,GALNT10,GART,GGPS1,GRHPR,GRK2,GRK6,GTF2I,HASPIN,HBB,HBEGF,HCK,HDAC7,HDX,HIBCH,HLA,DRB1,HMBOX1,HMGB3,HNRNPA2B1,HPD,HSD17B4,HSP90AB1,HTR1A,IDE,IFNGR1,IGF1R,IMPDH1,IQUB,ITGB3,ITPA,ITPKC,ITSN1,KIF11,KLK1,KMT5A,KYNU,LRBA,MAGEA4,MAGI2,MAP3K3,MAPK6,MARF1,MARK1,MATK,MDH1,MEMO1,MMP1,MMP2,MSH2,MSN,MTAP,MUC1,MYBPC1,MYBPC3,MYSM1,NAE1,NBEA,NCBP1,NCOA3,NF2,NFATC1,NMRK1,NMT1,NOTCH1,NR1I3,NT5C3A,NUP214,OAT,ODC1,OXSR1,PA2G4,PAH,PANK1,PAPSS1,PARN,PARP3,PATJ,PC,PCYT2,PK3,PK4,PEX5,PGC,PGK1,PHF24,PIP4K2C,POU2F1,PPARG,PPP2R1A,PRKCB,PTK2B,PTPRE,PTPRF,PUS10,PYGL,RAC1,RARA,RARG,RBBP6,RBM39,RBP5,RGS6,RND1,RRM1,RTN4IP1,RUVBL1,SART3,SEC23A,SEMA4D,SENP2,SERPINA5,SF3B6,SFMBT2,SFN,SH2B2,SH3YL1,SKP1,SLC5A1,SLK,SMAP1,SMG5,SMG7,SMTN,SMURF2,SNX1,SPEF1,STAR D13,STK16,STK4,SUB1,SULT1A1,SYT13,TAF13,THBS2,TJP1,TLR4,TRIM21,TTR,UEVLD,USP19,UTRN,VAV3,VEGFB,WEE1,WHRN,WWP1,XIAP,XRCC6,YY1,ZCWPW1,ZEB2,ZFP28,ZIC3,ZNF292,ZNF462                                                                                                        |
| 94 | Clear,cell adenocarcinoma            | Cancer,Organismal Injury and Abnormalities                                             | 3.21E,10 | 52  | ACACB,ALB,ALK,AR,ASAP1,ATXN3,BTRC,CANT1,CSF2RB,CTCF,CYP17A1,ECHS1,EP300,EPAH3,ERBB4,FAP,FN1,GRHPR,HBB,HLA,DRB1,HSD17B4,HSP90AB1,IGF1R,IMPDH1,ITGB3,KIF11,KLK1,MMP2,MUC1,MYBPC1,NCOA3,NF2,NOTCH1,NR1I3,NUP214,PANK1,PARP3,PK4,PPP2R1A,PTPRE,PYGL,RARA,RBP5,RRM1,SMG7,SMTN,SULT1A1,TJP1,TLR4,ZCWPW1,ZNF292,ZNF462                                                                                                                                                                                                                                                                                                                                                                                                                                                                                                                                                                                                                                                                                                                                                                                                                                                                                                                                                                                                                                                                                                                                                                       |

|     |                                     |                                                                                        |          |     |                                                                                                                                                                                                                                                                                                                                                                                                                                                                                                                                                                                                                                                                                                                                                                                                                                                                                                                                                                                                                                                                                                                                                                                                                                                                                                                                                                                                                                                                                                                                                                                                                                                                                                                           |
|-----|-------------------------------------|----------------------------------------------------------------------------------------|----------|-----|---------------------------------------------------------------------------------------------------------------------------------------------------------------------------------------------------------------------------------------------------------------------------------------------------------------------------------------------------------------------------------------------------------------------------------------------------------------------------------------------------------------------------------------------------------------------------------------------------------------------------------------------------------------------------------------------------------------------------------------------------------------------------------------------------------------------------------------------------------------------------------------------------------------------------------------------------------------------------------------------------------------------------------------------------------------------------------------------------------------------------------------------------------------------------------------------------------------------------------------------------------------------------------------------------------------------------------------------------------------------------------------------------------------------------------------------------------------------------------------------------------------------------------------------------------------------------------------------------------------------------------------------------------------------------------------------------------------------------|
| 95  | Organismal death                    | Organismal Survival                                                                    | 3.21E,10 | 40  | ALK,AOC3,AR,CD74,CLK1,DPP4,ECHS1,ESR1,F2,FABP7,FAP,FHIT,FN1,HBEGF,HSP90AB1,IFNG,IFNGR1,IGF1R,ITGB3,MDH1,MMP2,MSN,MUC1,NAE1,NCOA3,NDC80,NOTCH1,ODC1,OXSR1,PDHA1,PGK1,PPARG,RAC1,RARA,RARG,STARD13,STK4,THBS2,VAV3,ZEB2                                                                                                                                                                                                                                                                                                                                                                                                                                                                                                                                                                                                                                                                                                                                                                                                                                                                                                                                                                                                                                                                                                                                                                                                                                                                                                                                                                                                                                                                                                     |
| 96  | Mature B cell malignant tumor       | Cancer,Hematological Disease,Immunological Disease,Organismal Injury and Abnormalities | 3.27E,10 | 58  | ALK,ANXA6,ARHGFE1,ATXN3,B2M,BCR,BTK,CLK1,CSDE1,CSF2RB,CSTF2,CTCF,DGKA,ECI2,EP300,EPH A3,ERBB4,FAS,FCGR2A,FN1,GART,GGPS1,GRHPR,GTF2I,HAT1,HLA,DRB1,HMOX1,HSP90AB1,IFNG,IMP DH1,IQUB,ITGB3,ITPK1,MMP2,NAE1,NCBP1,NDC80,NFATC1,NOTCH1,PC,PGK1,POT1,PRKCB,PTK2B,PTP RE,PTPRF,RAC1,RARA,RRM1,SEM1,SLC5A1,SNX1,THBS2,TXNDC12,VAV3,XIAP,XRCC6,ZNF292                                                                                                                                                                                                                                                                                                                                                                                                                                                                                                                                                                                                                                                                                                                                                                                                                                                                                                                                                                                                                                                                                                                                                                                                                                                                                                                                                                             |
| 97  | Allergy                             | Immunological Disease                                                                  | 3.51E,10 | 26  | ACADVL,AR,C1R,CD1A,CD74,CSF2RB,DPP4,ESR1,FAS,G6PD,GRK2,HBB,HCK,HLA,DRB1,HTR1A,IDE,IFN G,KLK1,MSN,PDK4,PPARG,PRKCB,PSAP,RUVBL1,TLR4,XRCC6                                                                                                                                                                                                                                                                                                                                                                                                                                                                                                                                                                                                                                                                                                                                                                                                                                                                                                                                                                                                                                                                                                                                                                                                                                                                                                                                                                                                                                                                                                                                                                                  |
| 98  | Apoptosis of tumor cells            | Cancer,Cell Death and Survival,Organismal Injury and Abnormalities,Tumor Morphology    | 3.75E,10 | 17  | ALB,AR,B2M,BTK,F2,FAS,FHIT,HBEGF,HMOX1,IFNG,IGF1R,MUC1,NCOA3,NOTCH1,RAC1,RARA,XIAP                                                                                                                                                                                                                                                                                                                                                                                                                                                                                                                                                                                                                                                                                                                                                                                                                                                                                                                                                                                                                                                                                                                                                                                                                                                                                                                                                                                                                                                                                                                                                                                                                                        |
| 99  | Epithelial neoplasm                 | Cancer,Organismal Injury and Abnormalities                                             | 3.87E,10 | 281 | AASDHPPT,ACACB,ACADSB,ACADVL,ACAT2,ACBD7,ACSM2A,ACVR2B,ACY1,ADH1C,ADH7,ALB,ALK, ALOX12,AMY1C (includes others),ANXA6,AOC3,APEX1,APPL1,AR,ARF6,ARHGAP5,ARHGFE1,ASAP1,ATP7B,ATXN3,B2M,B3GAT2,B3 GAT3,BCR,BMP1,BPI,BTK,BTRC,C1R,C8A,CA8,CAMK4,CANT1,CD1A,CD74,CDK5R1,CERT1,CHKA,CIAO1, CLCN5,CLK1,CRYM,CSDE1,CSF2RB,CSNK1G1,CSNK1G2,CSTF2,CTCF,CUL1,CYP17A1,CYP2E1,CYP2R1,C YP7A1,DAPK2,DCTD,DCXR,DFFA,DGKA,DHPS,DMC1,DOK2,DPP4,DSG2,DTYMK,ECHS1,ECI2,EP300,EPH A3,EP300,EPH A3,ERBB4,ERI1,ESR1,ETF1,EXOSC9,F2,F3,FABP3,FABP7,FAP,FAS,FCGR2A,FHIT,FLNB,FN1,G6PD, GAD2,GALM,GALNT10,GART,GC,GGPS1,GRHPR,GRK2,GRK6,GSTT2/GSTT2B,GTF2F2,GTF2I,HADH,HASPIN, HAT1,HBB,HBEGF,HCK,HDAC7,HDX,HIBCH,HK2,HLA,DRB1,HMGB3,HMGCS1,HMOX1,HNR NPA2B1,HPD,HSCB,HSD17B10,HSD17B4,HSP90AB1,HTR1A,IDE,IFNG,IFNGR1,IGF1R,IMPA2,IMPDH1,IQU B,ITGB3,ITPA,ITPK1,ITPKC,ITSN1,KIF11,KLK1,KMT5A,KYNU,LRBA,MAGEA4,MAGI2,MAP3K3,MAPK6,M ARF1,MARK1,MATK,MDH1,MECR,MEMO1,MMP1,MMP2,MSH2,MSN,MTAP,MUC1,MYBPC1,MYBPC3,MY SM1,NAE1,NBEA,NCBP1,NCOA3,NDC80,NDUFAB1,NF2,NFATC1,NME3,NMRK1,NMT1,NOTCH1,NR1I3,NS UN5,NT5C3A,NUP214,OAT,ODC1,OXSR1,PA2G4,PAFAH1B2,PAH,PANK1,PAPSS1,PARN,PARP3,PATJ,PC,P CYT2,PDF,PDHA1,PDK2,PDK3,PDK4,PEX5,PGC,PGK1,PHF24,PIP4K2C,PNMT,POT1,POU2F1,PPARG,PPP2R1 A,PRKCB,PSAP,PTK2B,PTPRE,PTPRF,PUS10,PYGL,RAB26,RAC1,RARA,RARG,RBBP6,RBM39,RBP5,RGS6, RND1,RPA3,RRM1,RTN4IP1,RUVBL1,SART3,SEC23A,SEM1,SEMA4D,SEN2,SERPINA5,SF3B6,SFMBT2,SF N,SH2B2,SH3YL1,SKP1,SLC5A1,SLK,SMAP1,SMG5,SMG7,SMTN,SMURF2,SNX1,SNX22,SPEF1,STARD13,S TK16,STK4,SUB1,SULT1A1,SYT13,TAF13,THBS2,TJP1,TLR4,TRIM21,TTR,TXNDC12,UEVLD,USP19,UTRN, VAV3,VEGFB,VPS26A,WEE1,WHRN,WWP1,XIAP,XRCC6,YWHAH,YWHAQ,YY1,ZBTB43,ZCWPW1,ZEB2,Z FP28,ZIC3,ZNF292,ZNF462 |
| 100 | Stage IV malignant tumor            | Cancer,Organismal Injury and Abnormalities                                             | 4.22E,10 | 19  | ALB,ALK,AR,BTK,CSF2RB,CYP17A1,ERBB4,ESR1,FCGR2A,FN1,GART,HSP90AB1,IGF1R,PARP3,PTK2B,R ARA,RARG,RRM1,VEGFB                                                                                                                                                                                                                                                                                                                                                                                                                                                                                                                                                                                                                                                                                                                                                                                                                                                                                                                                                                                                                                                                                                                                                                                                                                                                                                                                                                                                                                                                                                                                                                                                                 |
| 101 | Malignant genitourinary solid tumor | Cancer,Organismal Injury and Abnormalities                                             | 4.34E,10 | 225 | AASDHPPT,ACACB,ACADSB,ACADVL,ACBD7,ACP3,ACY1,ALB,ALK,ANG,ANXA6,AOC3,APEX1,APPL1, AR,ARF6,ARHGAP5,ARHGFE1,ASAP1,ATP7B,ATXN3,B2M,B3GAT2,BCR,BMP1,BTK,BTRC,C1R,C8A,CA8,C AMK4,CANT1,CD1A,CD74,CERT1,CLCN5,CLK1,CSDE1,CSF2RB,CSNK1G1,CSTF2,CTCF,CUL1,CYP17A1,C YP2E1,CYP7A1,DAPK2,DCTD,DGKA,DHPS,DMC1,DOK2,DPP4,DTYMK,ECHS1,EP300,EPA3,EP300,EPH B4,ESR1,ETF1,EXOSC9,F2,F3,FABP7,FAP,FAS,FCGR2A,FLNB,FN1,G6PD,GAD2,GALM,GALNT10,GART,GC, GGPS1,GRHPR,GRK2,GRK6,GTF2I,HASPIN,HAT1,HBB,HBEGF,HCK,HDAC7,HDX,HIBCH,HLA,DRB1,HMB OX1,HMGB3,HMGCS1,HMOX1,HNRNPA2B1,HPD,HSD17B4,HSP90AB1,HTR1A,IFNG,IFNGR1,IGF1R,IMPD H1,IQUB,ITGB3,ITPA,ITPKC,ITSN1,KIF11,KLK1,KMT5A,KYNU,LRBA,MAGEA4,MAGI2,MAP3K3,MAPK6, MARF1,MARK1,MATK,MDH1,MEMO1,MMP1,MMP2,MSH2,MSN,MTAP,MUC1,MYBPC1,MYBPC3,MYSM1, NAE1,NBEA,NCBP1,NCOA3,NDC80,NF2,NFATC1,NMRK1,NMT1,NOTCH1,NR1I3,NT5C3A,NUP214,OAT,OD C1,OXSR1,PA2G4,PAFAH1B2,PAH,PANK1,PAPSS1,PARN,PARP3,PATJ,PC,PDK3,PDK4,PGC,PGK1,PHF24,P OU2F1,PPARG,PPP2R1A,PRKCB,PSAP,PTK2B,PTPRE,PTPRF,PYGL,RAC1,RARA,RARG,RBBP6,RBM39,RBP                                                                                                                                                                                                                                                                                                                                                                                                                                                                                                                                                                                                                                                                             |



|     |                                |                                                                   |          |     |                                                                                                                                                                                                                                                                                                                                                                                                                                                                                                                                                                                                                                                                                                                                                                                                                                                                                                                                                                                                                                                                                                                                                                                                                                                                                                                                                 |
|-----|--------------------------------|-------------------------------------------------------------------|----------|-----|-------------------------------------------------------------------------------------------------------------------------------------------------------------------------------------------------------------------------------------------------------------------------------------------------------------------------------------------------------------------------------------------------------------------------------------------------------------------------------------------------------------------------------------------------------------------------------------------------------------------------------------------------------------------------------------------------------------------------------------------------------------------------------------------------------------------------------------------------------------------------------------------------------------------------------------------------------------------------------------------------------------------------------------------------------------------------------------------------------------------------------------------------------------------------------------------------------------------------------------------------------------------------------------------------------------------------------------------------|
|     |                                |                                                                   |          |     | 5,RGS6,RND1,RRM1,RTN4IP1,RUVBL1,S100A6,SART3,SEMA4D,SENP2,SERPINA5,SF3B6,SFMBT2,SFN,SH3YL1,SKP1,SLC5A1,SLK,SMAP1,SMG5,SMG7,SMTN,SMURF2,SNX1,STK4,SUB1,SULT1A1,SYT13,TAF13,THBS2,TJP1,TLR4,TRIM21,TTR,UEVLD,USP19,UTRN,VAV3,WEE1,WHRN,WWP1,XIAP,YWHAQ,YY1,ZCWPW1,ZEB2,ZFP28,ZIC3,ZNF292,ZNF462                                                                                                                                                                                                                                                                                                                                                                                                                                                                                                                                                                                                                                                                                                                                                                                                                                                                                                                                                                                                                                                   |
| 102 | Pelvic cancer                  | Cancer,Organismal Injury and Abnormalities                        | 4.34E,10 | 209 | AASDHPPT,ACACB,ACADSB,ACADVL,ACBD7,ACP3,ACY1,ADH7,ALB,ALK,ANG,ANXA6,AOC3,APEX1,APPL1,AR,ARF6,ARHGAP5,ARHGEF1,ASAP1,ATP7B,B2M,B3GAT2,BCR,BMP1,BTK,BTRC,C1R,C8A,CA8,CA8,CA8,CAMK4,CANT1,CD1A,CD74,CLCN5,CLK1,CSDE1,CSF2RB,CSNK1G1,CSTF2,CTCF,CUL1,CYP17A1,CYP2E1,CYP7A1,DAPK2,DCTD,DGKA,DHPS,DMC1,DOK2,DPP4,DTYMK,EP300,EPA3,EPS8L2,ERBB4,ESR1,ETF1,F2,F3,FABP7,FAP,FAS,FCGR2A,FLNB,FN1,G6PD,GAD2,GALM,GALNT10,GART,GC,GGPS1,GRHPR,GRK2,GRK6,GTF2I,HASPIN,HBB,HBEFG,HCK,HDAC7,HDX,HLA,DRB1,HMBOX1,HMGB3,HMOX1,HNRNPA2B1,HPD,HSD17B4,HSP90AB1,HTR1A,IFNG,IFNGR1,IGF1R,IQUB,ITGB3,ITPA,ITPKC,ITSN1,KIF11,KMT5A,KYNU,LRBA,MAGEA4,MAGI2,MAP3K3,MAPK6,MARF1,MARK1,MATK,MDH1,MEMO1,MMP1,MMP2,MSH2,MSN,MTAP,MUC1,MYBPC1,MYBPC3,MYSM1,NAE1,NBEA,NCBP1,NCOA3,NF2,NFATC1,NMRK1,NMT1,NOTCH1,NR1I3,NT5C3A,NUP214,OAT,ODC1,OXSR1,PA2G4,PAH,PANK1,PAPSS1,PARN,PARP3,PATJ,PC,PDK3,PDK4,PGC,PGK1,PHF24,POU2F1,PPARG,PPP2R1A,PRKCB,PSAP,PTK2B,PTPRE,PTPRF,PYGL,RAC1,RARA,RARG,RBBP6,RBM39,RGS6,RND1,RRM1,RTN4IP1,RUVBL1,SART3,SEMA4D,SENP2,SERPINA5,SF3B6,SFMBT2,SFN,SH3YL1,SKP1,SLC5A1,SLK,SMAP1,SMG5,SMTN,SMURF2,SNX1,STK4,SUB1,SULT1A1,SYT13,TAF13,THBS2,TJP1,TLR4,TRIM21,TTR,UEVLD,USP19,UTRN,VAV3,VEGFB,WHRN,WWP1,XIAP,YWHAQ,YY1,ZCWPW1,ZEB2,ZFP28,ZIC3,ZNF292,ZNF462                                                                                         |
| 103 | Genitourinary tumor            | Cancer,Organismal Injury and Abnormalities                        | 4.55E,10 | 227 | AASDHPPT,ACACB,ACADSB,ACADVL,ACBD7,ACP3,ACY1,ALB,ALK,ANG,ANXA6,AOC3,APEX1,APPL1,AR,ARF6,ARHGAP5,ARHGEF1,ASAP1,ATP7B,ATXN3,B2M,B3GAT2,BCR,BMP1,BTK,BTRC,C1R,C8A,CA8,CAMK4,CANT1,CD1A,CD74,CERT1,CLCN5,CLK1,CSDE1,CSF2RB,CSNK1G1,CSTF2,CTCF,CUL1,CYP17A1,CYP2E1,CYP7A1,DAPK2,DCTD,DGKA,DHPS,DMC1,DOK2,DPP4,DTYMK,ECHS1,EP300,EPA3,EPS8L2,ERBB4,ESR1,ETF1,EXOSC9,F2,F3,FABP7,FAP,FAS,FCGR2A,FLNB,FN1,G6PD,GAD2,GALM,GALNT10,GART,GC,GGPS1,GRHPR,GRK2,GRK6,GTF2I,HASPIN,HAT1,HBB,HBEFG,HCK,HDAC7,HDX,HIBCH,HLA,DRB1,HMBOX1,HMGB3,HMGCS1,HMOX1,HNRNPA2B1,HPD,HSD17B10,HSD17B4,HSP90AB1,HTR1A,IFNG,IFNGR1,IGF1R,IMPDH1,IQUB,ITGB3,ITPA,ITPKC,ITSN1,KIF11,CLK1,KMT5A,KYNU,LRBA,MAGEA4,MAGI2,MAP3K3,MAPK6,MARF1,MARK1,MATK,MDH1,MEMO1,MMP1,MMP2,MSH2,MSN,MTAP,MUC1,MYBPC1,MYBPC3,MYSM1,NAE1,NBEA,NCBP1,NCOA3,NDC80,NF2,NFATC1,NMRK1,NMT1,NOTCH1,NR1I3,NT5C3A,NUP214,OAT,ODC1,OXSR1,PA2G4,PAFAH1B2,PAH,PANK1,PAPSS1,PARN,PARP3,PATJ,PC,PDK3,PDK4,PGC,PGK1,PHF24,POU2F1,PPARG,PPP2R1A,PRKCB,PSAP,PTK2B,PTPRE,PTPRF,PYGL,RAC1,RARA,RARG,RBBP6,RBM39,RBP5,RGS6,RND1,RRM1,RTN4IP1,RUVBL1,S100A6,SART3,SEMA4D,SENP2,SERPINA5,SF3B6,SFMBT2,SFN,SH3YL1,SKP1,SLC5A1,SLK,SMAP1,SMG5,SMG7,SMTN,SMURF2,SNX1,STK4,SUB1,SULT1A1,SYT13,TAF13,THBS2,TJP1,TLR4,TRIM21,TTR,UEVLD,USP19,UTRN,VAV3,VEGFB,WEE1,WHRN,WWP1,XIAP,YWHAQ,YY1,ZCWPW1,ZEB2,ZFP28,ZIC3,ZNF292,ZNF462 |
| 104 | Renal lesion                   | Organismal Injury and Abnormalities, Renal and Urological Disease | 4.87E,10 | 64  | ACACB,ALB,AR,ASAP1,ATXN3,B2M,BTRC,CANT1,CSF2RB,CTCF,CYP17A1,ECHS1,EP300,EPA3,ERBB4,ESR1,FAP,FN1,G6PD,GGPS1,GRHPR,HBB,HIBCH,HLA,DRB1,HMOX1,HSD17B4,HSP90AB1,IGF1R,IMPDH1,ITGB3,KIF11,CLK1,MMP2,MSH2,MUC1,MYBPC1,NCOA3,NF2,NOTCH1,NR1I3,NUP214,PANK1,PDK4,PPARG,PPP2R1A,PRKCB,PTPRE,PYGL,RARA,RARG,RBP5,RRM1,SMG7,SMTN,SMURF2,SULT1A1,TJP1,TLR4,UTRN,YY1,ZCWPW1,ZEB2,ZNF292,ZNF462                                                                                                                                                                                                                                                                                                                                                                                                                                                                                                                                                                                                                                                                                                                                                                                                                                                                                                                                                                |
| 105 | Development of malignant tumor | Cancer,Organismal Injury and Abnormalities                        | 5.34E,10 | 232 | AASDHPPT,ACACB,ACADSB,ACADVL,ACBD7,ACY1,ADH1C,ADH7,ALB,ALK,ALOX12,AOC3,APEX1,APPL1,AR,ARF6,ARHGAP5,ARHGEF1,ASAP1,ATP7B,ATXN3,B2M,B3GAT2,BCR,BMP1,BPI,BTK,BTRC,C1R,C8A,CA8,CAMK4,CANT1,CD1A,CDK5R1,CERT1,CHKA,CLCN5,CLK1,CSDE1,CSF2RB,CSNK1G1,CSNK1G2,CSTF2,CTCF,CUL1,CYP17A1,CYP2E1,CYP7A1,DAPK2,DCTD,DCXR,DFFA,DGKA,DHPS,DOK2,DPP4,DSG2,DTYMK,ECHS1,EP300,EPA3,ERBB4,ESR1,ETF1,EXOSC9,F2,F3,FABP7,FAP,FAS,FCGR2A,FHIT,FLNB,FN1,G6PD,GAD2,GALNT10,GART,GGPS1,GRHPR,GRK2,GRK6,GTF2I,HASPIN,HBB,HBEFG,HCK,HDAC7,HDX,HIBCH,HLA,DRB1,HMBOX1,HMGB3,HNRNPA2B1,HPD,HSD17B4,HSP90AB1,HTR1A,IDE,IFNG,IFNGR1,IGF1R,IMPDH1,IQUB,ITGB3,ITPA,ITPKC,ITSN1,KIF11,CLK1,KMT5A,KYNU,LRBA,MAGEA4,MAGI2,MAP3K3,MAPK6,MARF1,MARK1,MATK,MDH1,MEMO1,MMP1,MMP2,MSH2,MSN,MTAP,MUC1,MYBPC1,MYBPC3,MYSM1,NAE1,NBEA,NCBP1,NCOA3,NDC80,NF2,NFATC1,NMRK1,NMT1,NOTCH1,NR1I3,NT5C3A,NUP214,OAT                                                                                                                                                                                                                                                                                                                                                                                                                                                                                  |

|     |                          |                                                                                                   |          |     |                                                                                                                                                                                                                                                                                                                                                                                                                                                                                                                                                                                                                                                                                                                                                                                                                                                                                                                                                                                                                                                                                                                                                                                                                                                                                                                                                                                                                    |
|-----|--------------------------|---------------------------------------------------------------------------------------------------|----------|-----|--------------------------------------------------------------------------------------------------------------------------------------------------------------------------------------------------------------------------------------------------------------------------------------------------------------------------------------------------------------------------------------------------------------------------------------------------------------------------------------------------------------------------------------------------------------------------------------------------------------------------------------------------------------------------------------------------------------------------------------------------------------------------------------------------------------------------------------------------------------------------------------------------------------------------------------------------------------------------------------------------------------------------------------------------------------------------------------------------------------------------------------------------------------------------------------------------------------------------------------------------------------------------------------------------------------------------------------------------------------------------------------------------------------------|
|     |                          |                                                                                                   |          |     | T,ODC1,OXSR1,PA2G4,PAH,PANK1,PAPSS1,PARN,PARP3,PATJ,PC,PCYT2,PKD3,PKD4,PEX5,PGC,PGK1,PHF24,PIP4K2C,POU2F1,PPARG,PPP2R1A,PRKCB,PTK2B,PTPRE,PTPRF,PUS10,PYGL,RAC1,RARA,RARG,RBBP6,RBM39,RBP5,RGS6,RND1,RRM1,RTN4IP1,RUVBL1,SART3,SEC23A,SEMA4D,SEN2,SERPINA5,SF3B6,SFMBT2,SFN,SH2B2,SH3YL1,SKP1,SLC5A1,SLK,SMAP1,SMG5,SMG7,SMTN,SMURF2,SNX1,SPEF1,STAR13,STK4,SUB1,SULT1A1,SYT13,THBS2,TJP1,TLR4,TRIM21,TTR,UEVLD,USP19,UTRN,VAV3,VEGFB,WE1,WHRN,WWP1,XIAP,XRCC6,YY1,ZCWPW1,ZEB2,ZFP28,ZIC3,ZNF292,ZNF462                                                                                                                                                                                                                                                                                                                                                                                                                                                                                                                                                                                                                                                                                                                                                                                                                                                                                                            |
| 106 | Endocrine carcinoma      | Cancer,Endocrine System Disorders,Organismal Injury and Abnormalities                             | 6.05E,10 | 242 | AASDHPPT,ACACB,ACADSB,ACADVL,ACAT2,ACBD7,ACVR2B,ACY1,ADH7,ALK,ALOX12,AMY1C (includes others),ANXA6,AOC3,APPL1,AR,ARHGAP5,ARHGFE1,ASAP1,ATP7B,ATXN3,B2M,B3GAT2,B3GAT3,BCR,BMP1,BPI,BTK,BTRC,C8A,CA8,CANT1,CD1A,CHKA,CIAO1,CLCN5,CLK1,CRYM,CSDE1,CSF2RB,CSNK1G1,CSNK1G2,CSTF2,CTCF,CUL1,CYP17A1,CYP2E1,CYP2R1,CYP7A1,DAPK2,DCTD,DCXR,DFFA,DGKA,DHPS,DMC1,DOK2,DPP4,DSG2,DTYMK,EP300,EP300,ERBB4,ERI1,ESR1,ETF1,F2,F3,FAP,FLNB,FN1,G6PD,GAD2,GALM,GALNT10,GART,GC,GRHPR,GRK2,GRK6,GSTT2/GSTT2B,GTF2F2,GTF2I,HADH,HASPIN,HAT1,HBEGF,HCK,HDAC7,HDX,HIBCH,HLA,DRB1,HMBOX1,HMGB3,HNRNPA2B1,HSP90AB1,IGF1R,IMPDH1,IQUB,ITGB3,ITPK1,ITPKC,ITSN1,KIF11,KLK1,KMT5A,KYNU,LRBA,MAGEA4,MAGI2,MAP3K3,MAPK6,MARF1,MARK1,MATK,MECR,MEMO1,MMP1,MMP2,MSH2,MSN,MTAP,MUC1,MYBPC1,MYBPC3,MYSM1,NAE1,NBEA,NCBP1,NCOA3,NDC80,NDUFAB1,NF2,NFATC1,NME3,NMRK1,NOTCH1,NR1I3,NT5C3A,NUP214,OAT,ODC1,OXSR1,PA2G4,PAFAH1B2,PAH,PANK1,PAPSS1,PARN,PARP3,PATJ,PC,PCYT2,PDF,PDHA1,PKD3,PKD4,PEX5,PGK1,PHF24,PIP4K2C,PNMT,POU2F1,PPARG,PPP2R1A,PRKCB,PSAP,PTK2B,PTPRE,PTPRF,PYGL,RAB26,RAC1,RARA,RARG,RBBP6,RBM39,RGS6,RND1,RPA3,RRM1,RTN4IP1,RUVBL1,SART3,SEC23A,SEM1,SEMA4D,SEN2,SERPINA5,SFMBT2,SH2B2,SH3YL1,SKP1,SLC5A1,SLK,SMAP1,SMG5,SMG7,SMTN,SMURF2,SNX1,SNX22,SPEF1,STAR13,STK4,SUB1,SULT1A1,SYT13,THBS2,TJP1,TLR4,TRIM21,TTR,TXNDC12,UEVLD,USP19,UTRN,VAV3,VPS26A,WE1,WHRN,WWP1,XRCC6,YWHAQ,YY1,ZBTB43,ZCWPW1,ZEB2,ZFP28,ZIC3,ZNF292,ZNF462 |
| 107 | Ovarian cancer           | Cancer,Endocrine System Disorders,Organismal Injury and Abnormalities,Reproductive System Disease | 6.13E,10 | 77  | ALB,ALK,ANG,AOC3,AR,ARF6,ARHGFE1,ASAP1,B2M,BCR,CA8,CD74,CLK1,CSF2RB,CSNK1G1,CSTF2,CTCF,DPP4,EP300,EPAH3,ESR1,F2,FAP,FAS,FN1,GAD2,GART,GC,HBEGF,HCK,HNRNPA2B1,HSP90AB1,HTR1A,IFNGR1,ITPA,ITSN1,MAGEA4,MAGI2,MAP3K3,MMP1,MMP2,MSH2,MUC1,NBEA,NCOA3,NF2,NOTCH1,NR1I3,NT5C3A,ODC1,PARP3,PC,PKD4,PGC,POU2F1,PPARG,PPP2R1A,PRKCB,PTPRF,PYGL,RBM39,RRM1,RTN4IP1,SERPINA5,SFMBT2,SH3YL1,SKP1,SMTN,SYT13,THBS2,TLR4,TTR,UTRN,VAV3,WWP1,XIAP,ZEB2                                                                                                                                                                                                                                                                                                                                                                                                                                                                                                                                                                                                                                                                                                                                                                                                                                                                                                                                                                            |
| 108 | Development of carcinoma | Cancer,Organismal Injury and Abnormalities                                                        | 6.54E,10 | 231 | AASDHPPT,ACACB,ACADSB,ACADVL,ACBD7,ACY1,ADH1C,ADH7,ALB,ALK,ALOX12,AOC3,APEX1,APPL1,AR,ARF6,ARHGAP5,ARHGFE1,ASAP1,ATP7B,ATXN3,B2M,B3GAT2,BCR,BMP1,BPI,BTK,BTRC,C1R,C8A,CA8,CAMK4,CANT1,CD1A,CDK5R1,CERT1,CHKA,CLCN5,CLK1,CSDE1,CSF2RB,CSNK1G1,CSNK1G2,CSTF2,CTCF,CUL1,CYP17A1,CYP2E1,CYP7A1,DAPK2,DCTD,DCXR,DFFA,DGKA,DHPS,DOK2,DPP4,DSG2,DTYMK,ECHS1,EP300,EPAH3,ERBB4,ESR1,ETF1,EXOSC9,F2,F3,FABP7,FAP,FAS,FCGR2A,FBP1,FLNB,FN1,G6PD,GAD2,GALNT10,GART,GGPS1,GRHPR,GRK2,GRK6,GTF2I,HASPIN,HBB,HBEGF,HCK,HDAC7,HDX,HIBCH,HLA,DRB1,HMBOX1,HMGB3,HNRNPA2B1,HPD,HSD17B4,HSP90AB1,HTR1A,IDE,IFNGR1,IGF1R,IMPDH1,IQUB,ITGB3,ITPA,ITPKC,ITSN1,KIF11,KLK1,KMT5A,KYNU,LRBA,MAGEA4,MAGI2,MAP3K3,MAPK6,MARF1,MARK1,MATK,MDH1,MEMO1,MMP1,MMP2,MSH2,MSN,MTAP,MUC1,MYBPC1,MYBPC3,MYSM1,NAE1,NBEA,NCBP1,NCOA3,NDC80,NF2,NFATC1,NMRK1,NMT1,NOTCH1,NR1I3,NT5C3A,NUP214,OAT,ODC1,OXSR1,PA2G4,PAH,PANK1,PAPSS1,PARN,PARP3,PATJ,PC,PCYT2,PKD3,PKD4,PEX5,PGC,PGK1,PHF24,PIP4K2C,POU2F1,PPARG,PPP2R1A,PRKCB,PTK2B,PTPRE,PTPRF,PUS10,PYGL,RAC1,RARA,RARG,RBBP6,RBM39,RBP5,RGS6,RND1,RRM1,RTN4IP1,RUVBL1,SART3,SEC23A,SEMA4D,SEN2,SERPINA5,SF3B6,SFMBT2,SFN,SH2B2,SH3YL1,SKP1,SLC5A1,SLK,SMAP1,SMG5,SMG7,SMTN,SMURF2,SNX1,SPEF1,STAR13,STK4,SUB1,SULT1A1,SYT13,THBS2,TJP1,TLR4,TRIM21,TTR,UEVLD,USP19,UTRN,VAV3,VEGFB,WE1,WHRN,WWP1,XIAP,XRCC6,YY1,ZCWPW1,ZEB2,ZFP28,ZIC3,ZNF292,ZNF462                                                   |
| 109 | Renal tumor              | Cancer,Organismal Injury and Abnormalities,Renal and Urological Disease                           | 7.57E,10 | 63  | ACACB,ALB,AR,ASAP1,ATXN3,B2M,BTRC,CANT1,CSF2RB,CTCF,CYP17A1,ECHS1,EP300,EPAH3,ERBB4,ESR1,FAP,FN1,G6PD,GGPS1,GRHPR,HBB,HIBCH,HLA,DRB1,HMOX1,HSD17B4,HSP90AB1,IGF1R,IMPDH1,ITGB3,KIF11,KLK1,MMP2,MSH2,MUC1,MYBPC1,NCOA3,NF2,NOTCH1,NR1I3,NUP214,PANK1,PKD4,PPAR                                                                                                                                                                                                                                                                                                                                                                                                                                                                                                                                                                                                                                                                                                                                                                                                                                                                                                                                                                                                                                                                                                                                                      |

|     |                              |                                                                         |          |     |                                                                                                                                                                                                                                                                                                                                                                                                                                                                                                                                                                                                                                                                                                                                                                                                                                                                                                                                                                                                                                                                                                                                                                  |
|-----|------------------------------|-------------------------------------------------------------------------|----------|-----|------------------------------------------------------------------------------------------------------------------------------------------------------------------------------------------------------------------------------------------------------------------------------------------------------------------------------------------------------------------------------------------------------------------------------------------------------------------------------------------------------------------------------------------------------------------------------------------------------------------------------------------------------------------------------------------------------------------------------------------------------------------------------------------------------------------------------------------------------------------------------------------------------------------------------------------------------------------------------------------------------------------------------------------------------------------------------------------------------------------------------------------------------------------|
|     |                              |                                                                         |          |     | G,PPP2R1A,PRKCB,PTPRE,PYGL,RARA,RARG,RBP5,RRM1,SMG7,SMTN,SULT1A1,TJP1,TLR4,UTRN,YY1,ZCWPW1,ZEB2,ZNF292,ZNF462                                                                                                                                                                                                                                                                                                                                                                                                                                                                                                                                                                                                                                                                                                                                                                                                                                                                                                                                                                                                                                                    |
| 110 | Development of genital tumor | Cancer,Organismal Injury and Abnormalities,Reproductive System Disease  | 7.77E,10 | 169 | AASDHPPT,ACACB,ACADSB,ACBD7,ACY1,ALB,ALK,AOC3,APPL1,AR,ARF6,ARHGAP5,ARHGEF1,ASAPI,ATP7B,B2M,B3GAT2,BCR,BTK,BTRC,C8A,CA8,CD1A,CLCN5,CLK1,CSDE1,CSF2RB,CSNK1G1,CSTF2,CTCF,CUL1,CYP7A1,DCTD,DHPS,DMC1,DOK2,DPP4,DTYMK,EP300,EPA3,ERBB4,ESR1,ETF1,F2,F3,FAP7,FABP7,FAP,P,FAS,FCGR2A,FLNB,FN1,G6PD,GAD2,GART,GRHPR,GRK2,ITPA,ITPKC,ITSN1,KIF11,LRBA,MAGEA4,MAGI2,MAP3K3,MAPK6,MARF1,MARK1,MDH1,MEMO1,MMP1,MMP2,MSH2,MSN,MUC1,MYBPC3,MYSM1,NAE1,NBEA,NCBP1,NCOA3,NF2,NFATC1,NMRK1,NMT1,NOTCH1,NR1I3,NT5C3A,NUP214,OAT,ODC1,PANK1,PARN,PARP3,PATJ,PC,PDK3,PDK4,PGC,PGK1,POU2F1,PPARG,PPP2R1A,PTPRE,PTPRF,PYGL,RAC1,RARA,RARG,RBBP6,RBM39,RGS6,RND1,RRM1,RTN4IP1,RUVBL1,S100A6,SART3,SENP2,SERPINA5,SF3B6,SFMBT2,SH3YL1,SKP1,SLC5A1,SLK,SMG5,SMTN,SMURF2,SNX1,STK4,SUB1,SULT1A1,SYT13,TAF13,THBS2,TJP1,TLR4,TRIM21,UEVLD,UTRN,VAV3,WEE1,WWP1,XIAP,YY1,ZEB2,ZFP28,ZIC3,ZNF292,ZNF462                                                                                                                                                                                                                                                                                      |
| 111 | Genitourinary adenocarcinoma | Cancer,Organismal Injury and Abnormalities                              | 8.97E,10 | 196 | AASDHPPT,ACACB,ACADSB,ACADVL,ACBD7,ACY1,ALB,ALK,ANXA6,AOC3,APEX1,APPL1,AR,ARF6,ARHGAP5,ARHGEF1,ASAPI,ATP7B,ATXN3,B2M,B3GAT2,BCR,BTK,BTRC,C8A,CA8,CAMK4,CANT1,CD1A,CLCN5,CLK1,CSDE1,CSF2RB,CSNK1G1,CSTF2,CTCF,CUL1,CYP17A1,CYP2E1,CYP7A1,DAPK2,DCTD,DMC1,DOK2,DPP4,DTYMK,ECHS1,EP300,EPA3,EP8L2,ERBB4,ESR1,ETF1,F2,F3,FAP,FCGR2A,FLNB,FN1,G6PD,GAD2,GALM,GALNT10,GART,GC,GGPS1,GRHPR,GRK2,GRK6,GTF2I,HASPIN,HBB,HBEGF,HCK,HDAC7,HDX,HLA,DRB1,HMBOX1,HMGB3,HNRNPA2B1,HPD,HSD17B4,HSP90AB1,HTR1A,IFNG,IFNGR1,IGF1R,IMPDH1,IQUB,ITGB3,ITPA,ITPKC,ITSN1,KIF11,KLK1,KMT5A,LRBA,MAGEA4,MAGI2,MAP3K3,MAPK6,MARF1,MARK1,MATK,MDH1,MEMO1,MMP1,MMP2,MSH2,MSN,MUC1,MYBPC1,MYBPC3,MYSM1,NBEA,NCBP1,NCOA3,NDC80,NF2,NFATC1,NMRK1,NMT1,NOTCH1,NR1I3,NT5C3A,NUP214,OAT,ODC1,OXSR1,PANK1,PAPSS1,PARN,PARP3,PATJ,PC,PDK3,PDK4,PGC,PGK1,PHF24,POU2F1,PPARG,PPP2R1A,PRKCB,PTK2B,PTPRE,PTPRF,PYGL,RAC1,RARA,RARG,RBBP6,RBM39,RBP5,RGS6,RND1,RRM1,RTN4IP1,RUVBL1,SART3,SENP2,SERPINA5,SF3B6,SFMBT2,SFN,SH3YL1,SKP1,SLC5A1,SLK,SMAP1,SMG5,SMG7,SMTN,SMURF2,STK4,SUB1,SULT1A1,SYT13,THBS2,TJP1,TLR4,TRIM21,UEVLD,USP19,UTRN,VAV3,WHRN,WWP1,XIAP,YY1,ZCWPW1,ZEB2,ZFP28,ZIC3,ZNF292,ZNF462 |
| 112 | Infection by RNA virus       | Infectious Diseases                                                     | 9.48E,10 | 55  | ACACB,ACADSB,ACP3,ADH1C,ADH7,ALB,ALOX12,AR,ARF6,B2M,BCR,BMP1,C1R,C8A,CANT1,CD74,CSF2RB,CTCF,DAPK2,DHPS,DPP4,EP300,ESR1,ETF1,F2,FAS,FCGR2A,FN1,GGPS1,GRK2,HBB,HIBCH,HLA,DRB1,HMGCS1,IFNG,IGF1R,IMPDH1,IQUB,ITGB3,LARS1,NBEA,NF2,NMT1,NUP214,PANK1,PPARG,PRKCB,RARA,RARG,RND1,RRM1,SUB1,TLR4,XIAP,ZNF292                                                                                                                                                                                                                                                                                                                                                                                                                                                                                                                                                                                                                                                                                                                                                                                                                                                           |
| 113 | Renal cancer                 | Cancer,Organismal Injury and Abnormalities,Renal and Urological Disease | 1.00E,09 | 62  | ACACB,ALB,AR,ASAPI,ATXN3,B2M,BTRC,CANT1,CSF2RB,CTCF,CYP17A1,ECHS1,EP300,EPA3,ERBB4,ESR1,FAP,FN1,G6PD,GGPS1,GRHPR,HBB,HIBCH,HLA,DRB1,HMOX1,HSD17B4,HSP90AB1,IGF1R,IMPDH1,ITGB3,KIF11,KLK1,MMP2,MSH2,MUC1,MYBPC1,NCOA3,NF2,NOTCH1,NR1I3,NUP214,PANK1,PDK4,PPARG,PPP2R1A,PRKCB,PTPRE,PYGL,RARA,RARG,RBP5,RRM1,SMG7,SMTN,SULT1A1,TJP1,TLR4,UTRN,ZCWPW1,ZEB2,ZNF292,ZNF462                                                                                                                                                                                                                                                                                                                                                                                                                                                                                                                                                                                                                                                                                                                                                                                            |
| 114 | Systemic autoimmune syndrome | Immunological Disease                                                   | 1.26E,09 | 59  | ADH1C,ALB,ALOX12,ANG,AR,ASAPI,B2M,BPI,C1R,CD1A,CD74,CDK5R1,CSF2RB,CYP2E1,CYP2R1,DPP4,ECI2,ESR1,EXOSC9,FAS,FCGR2A,FN1,GC,HCK,HDAC7,HLA,DRB1,HMOX1,IDE,IFNG,IGF1R,IMPDH1,ITPA,MMP1,MMP2,MTAP,MUC1,NF2,PGK1,PPARG,PRKCB,PTK2B,PTPRE,PTPRF,RARA,RARG,RGS6,S100A6,SF3B6,SLC5A1,SMG7,TAF13,TIMM9,TJP1,TLR4,TRIM21,VEGFB,WARS1,XIAP,XRCC6                                                                                                                                                                                                                                                                                                                                                                                                                                                                                                                                                                                                                                                                                                                                                                                                                               |
| 115 | Genital tract cancer         | Cancer,Organismal Injury and Abnormalities,Reproductive System Disease  | 1.32E,09 | 200 | AASDHPPT,ACACB,ACADSB,ACADVL,ACBD7,ACP3,ACY1,ALB,ALK,ANG,ANXA6,AOC3,APEX1,APPL1,AR,ARF6,ARHGAP5,ARHGEF1,ASAPI,ATP7B,B2M,B3GAT2,BCR,BTK,BTRC,C1R,C8A,CA8,CANT1,CD1A,CD74,CLCN5,CLK1,CSDE1,CSF2RB,CSNK1G1,CSTF2,CTCF,CUL1,CYP17A1,CYP2E1,CYP7A1,DCTD,DHPS,DMC1,DOK2,DPP4,DTYMK,EP300,EPA3,EP8L2,ERBB4,ESR1,ETF1,F2,F3,FAP7,FAP,FAS,FCGR2A,FLNB,FN1,G6PD,GAD2,GALM,GALNT10,GART,GC,GGPS1,GRHPR,GRK2,GTF2I,HASPIN,HBB,HBEGF,HCK,HDAC7,HDX,HLA,DRB1,HMBOX1,HMGB3,HMOX1,HNRNPA2B1,HPD,HSD17B4,HSP90AB1,HTR1A,IFNG,IFNGR1,IGF1R,IQUB,ITGB3,ITPA,ITPKC,ITSN1,KIF11,KMT5A,LRBA,MAGEA4,MAGI2,MAP3K3,MAPK6,MARF1,MARK1,MATK,MDH1,MEMO1,MMP1,MMP2,MSH2,MSN,MUC1,MYBPC1,MYBPC3,MYSM1,NAE1,NBEA,NC                                                                                                                                                                                                                                                                                                                                                                                                                                                                             |

|     |                                   |                                                                                        |          |     |                                                                                                                                                                                                                                                                                                                                                                                                                                                                                                                                                                                                                                                                                                                                                                                                                                                                                                                                                                                                                                                                                                                                                                                                                                                                                                                                                                                                                                                                                                                                                                                                                                                                                                        |
|-----|-----------------------------------|----------------------------------------------------------------------------------------|----------|-----|--------------------------------------------------------------------------------------------------------------------------------------------------------------------------------------------------------------------------------------------------------------------------------------------------------------------------------------------------------------------------------------------------------------------------------------------------------------------------------------------------------------------------------------------------------------------------------------------------------------------------------------------------------------------------------------------------------------------------------------------------------------------------------------------------------------------------------------------------------------------------------------------------------------------------------------------------------------------------------------------------------------------------------------------------------------------------------------------------------------------------------------------------------------------------------------------------------------------------------------------------------------------------------------------------------------------------------------------------------------------------------------------------------------------------------------------------------------------------------------------------------------------------------------------------------------------------------------------------------------------------------------------------------------------------------------------------------|
|     |                                   |                                                                                        |          |     | BP1,NCOA3,NF2,NFATC1,NMRK1,NMT1,NOTCH1,NR1I3,NT5C3A,NUP214,OAT,ODC1,OXSR1,PANK1,PAPSS1,PARN,PARP3,PATJ,PC,PKK3,PKK4,PGC,PGK1,PHF24,POU2F1,PPARG,PPP2R1A,PRKCB,PSAP,PTK2B,PTPRE,PTPRF,PYGL,RAC1,RARA,RARG,RBBP6,RBM39,RGS6,RND1,RRM1,RTN4IP1,RUVBL1,SART3,SEMA4D,SENP2,SERPINA5,SF3B6,SFMBT2,SFN,SH3YL1,SKP1,SLC5A1,SLK,SMAP1,SMG5,SMTN,SMURF2,SNX1,STK4,SUB1,SULT1A1,SYT13,TAF13,THBS2,TJP1,TLR4,TRIM21,TTR,UEVLD,USP19,UTRN,VAV3,WHRN,WWP1,XIAP,YWHAQ,YY1,ZEB2,ZFP28,ZIC3,ZNF462                                                                                                                                                                                                                                                                                                                                                                                                                                                                                                                                                                                                                                                                                                                                                                                                                                                                                                                                                                                                                                                                                                                                                                                                                      |
| 116 | Advanced extracranial solid tumor | Cancer,Organismal Injury and Abnormalities                                             | 1.33E,09 | 35  | ALB,ALK,AOC3,AR,B2M,BCR,BTK,C1R,CYP17A1,DPP4,DSG2,ERBB4,ESR1,F3,FAS,FCGR2A,FN1,GAD2,GART,GGPS1,HMOX1,HSP90AB1,IGF1R,MMP2,MUC1,NR1I3,PARP3,PGC,PTK2B,RAC1,RARG,RRM1,SKP1,VA V3,VEGFB                                                                                                                                                                                                                                                                                                                                                                                                                                                                                                                                                                                                                                                                                                                                                                                                                                                                                                                                                                                                                                                                                                                                                                                                                                                                                                                                                                                                                                                                                                                    |
| 117 | Carcinoma                         | Cancer,Organismal Injury and Abnormalities                                             | 1.63E,09 | 280 | AASDHPPT,ACACB,ACADSB,ACADVL,ACAT2,ACBD7,ACSM2A,ACVR2B,ACY1,ADH1C,ADH7,ALB,ALK,ALOX12,AMY1C (includes others),ANXA6,AOC3,APEX1,APPL1,AR,ARF6,ARHGAP5,ARHGEF1,ASAP1,ATP7B,ATXN3,B2M,B3GAT2,B3GAT3,BCR,BMP1,BPI,BTK,BTRC,C1R,C8A,CA8,CAMK4,CANT1,CD1A,CD74,CDK5R1,CERT1,CHKA,CIAO1,CLCN5,CLK1,CRYM,CSDE1,CSF2RB,CSNK1G1,CSNK1G2,CSTF2,CTCF,CUL1,CYP17A1,CYP2E1,CYP2R1,CYP7A1,DAPK2,DCTD,DCXR,DDFA,DGKA,DHPS,DMC1,DOK2,DPP4,DSG2,DTYMK,ECHS1,ECI2,EP300,EPH A3,EP8L2,ERBB4,ERI1,ESR1,ETF1,EXOSC9,F2,F3,FABP7,FAP,FAS,FCGR2A,FHIT,FLNB,FN1,G6PD,GAD2,GALM,GALNT10,GART,GC,GGPS1,GRHPR,GRK2,GRK6,GSTT2/GSTT2B,GTF2F2,GTF2I,HADH,HASPIN,HAT1,HBB,HBEGF,HCK,HDAC7,HDX,HIBCH,HK2,HLA,DRB1,HMBOX1,HMGB3,HMGCS1,HMOX1,HNRNPA2 B1,HPD,HSCB,HSD17B10,HSD17B4,HSP90AB1,HTR1A,IDE,IFNG,IFNGR1,IGF1R,IMPA2,IMPDH1,IQUB,ITG B3,ITPA,ITPK1,ITPKC,ITSN1,KIF11,KLK1,KMT5A,KYNU,LRBA,MAGEA4,MAGI2,MAP3K3,MAPK6,MARF1,MARK1,MATK,MDH1,MECR,MEMO1,MMP1,MMP2,MSH2,MSN,MTAP,MUC1,MYBPC1,MYBPC3,MYSM1,NAE1,NBEA,NCBP1,NCOA3,NDC80,NDUFAB1,NF2,NFATC1,NME3,NMRK1,NMT1,NOTCH1,NR1I3,NSUN5,N T5C3A,NUP214,OAT,ODC1,OXSR1,PA2G4,PAFAH1B2,PAH,PANK1,PAPSS1,PARN,PARP3,PATJ,PC,PCYT2,P DF,PDHA1,PKK2,PKK3,PKK4,PEX5,PGC,PGK1,PHF24,PIP4K2C,PNMT,POT1,POU2F1,PPARG,PPP2R1A,PRK CB,PSAP,PTK2B,PTPRE,PTPRF,PUS10,PYGL,RAB26,RAC1,RARA,RARG,RBBP6,RBM39,RBP5,RGS6,RND1, RPA3,RRM1,RTN4IP1,RUVBL1,SART3,SEC23A,SEM1,SEMA4D,SENP2,SERPINA5,SF3B6,SFMBT2,SFN,SH2 B2,SH3YL1,SKP1,SLC5A1,SLK,SMAP1,SMG5,SMG7,SMTN,SMURF2,SNX1,SNX22,SPEF1,STARD13,STK16,ST K4,SUB1,SULT1A1,SYT13,TAF13,THBS2,TJP1,TLR4,TRIM21,TTR,TXNDC12,UEVLD,USP19,UTRN,VAV3, VEGFB,VPS26A,WEE1,WHRN,WWP1,XIAP,XRCC6,YWHAQ,YY1,ZBTB43,ZCWPW1,ZEB2,ZFP28, ZIC3,ZNF292,ZNF462 |
| 118 | Mature B,cell neoplasm            | Cancer,Hematological Disease,Immunological Disease,Organismal Injury and Abnormalities | 1.69E,09 | 65  | ALK,ALOX12,ANXA6,ARHGEF1,ATXN3,B2M,BCR,BTK,CD74,CLK1,CSDE1,CSF2RB,CSTF2,CTCF,DGKA,D PP4,ECI2,EP300,EPA3,ERBB4,FAS,FCGR2A,FN1,GAD2,GART,GGPS1,GRHPR,GTF2F2,GTF2I,HAT1,HLA,DR B1,HMOX1,HSP90AB1,IFNG,IMPDH1,IQUB,ITGB3,ITPK1,MAGI2,MMP2,NAE1,NCBP1,NDC80,NFATC1,N OTCH1,PC,PGK1,POT1,PRKCB,PTK2B,PTPRE,PTPRF,RAC1,RARA,RRM1,SEM1,SLC5A1,SNX1,TAF13,THBS 2,TXNDC12,VAV3,XIAP,XRCC6,ZNF292                                                                                                                                                                                                                                                                                                                                                                                                                                                                                                                                                                                                                                                                                                                                                                                                                                                                                                                                                                                                                                                                                                                                                                                                                                                                                                                 |
| 119 | Anogenital cancer                 | Cancer,Organismal Injury and Abnormalities                                             | 1.74E,09 | 214 | AASDHPPT,ACACB,ACADSB,ACADVL,ACBD7,ACP3,ACY1,ALB,ALK,ANG,ANXA6,AOC3,APEX1,APPL1, AR,ARF6,ARHGAP5,ARHGEF1,ASAP1,ATP7B,B2M,B3GAT2,BCR,BMP1,BTK,BTRC,C1R,C8A,CA8,CAMK4, CANT1,CD1A,CD74,CERT1,CLCN5,CLK1,CSDE1,CSF2RB,CSNK1G1,CSTF2,CTCF,CUL1,CYP17A1,CYP2E1, CYP7A1,DAPK2,DCTD,DHPS,DMC1,DOK2,DPP4,DTYMK,EP300,EPA3,EP8L2,ERBB4,ESR1,ETF1,EXOSC 9,F2,F3,FABP7,FAP,FAS,FCGR2A,FLNB,FN1,G6PD,GAD2,GALM,GALNT10,GART,GC,GGPS1,GRHPR,GRK2, GRK6,GTF2I,HASPIN,HAT1,HBB,HBEGF,HCK,HDAC7,HDX,HLA,DRB1,HMBOX1,HMGB3,HMGCS1,HMOX 1,HNRNPA2B1,HPD,HSD17B4,HSP90AB1,HTR1A,IFNG,IFNGR1,IGF1R,IMPDH1,IQUB,ITGB3,ITPA,ITPKC,IT SN1,KIF11,KMT5A,LRBA,MAGEA4,MAGI2,MAP3K3,MAPK6,MARF1,MARK1,MATK,MDH1,MEMO1,MMP1 ,MMP2,MSH2,MSN,MUC1,MYBPC1,MYBPC3,MYSM1,NAE1,NBEA,NCBP1,NCOA3,NDC80,NF2,NFATC1,N MRK1,NMT1,NOTCH1,NR1I3,NT5C3A,NUP214,OAT,ODC1,OXSR1,PAFAH1B2,PANK1,PAPSS1,PARN,PARP 3,PATJ,PC,PKK3,PKK4,PGC,PGK1,PHF24,POU2F1,PPARG,PPP2R1A,PRKCB,PSAP,PTK2B,PTPRE,PTPRF,PY GL,RAC1,RARA,RARG,RBBP6,RBM39,RGS6,RND1,RRM1,RTN4IP1,RUVBL1,S100A6,SART3,SEMA4D,SENP 2,SERPINA5,SF3B6,SFMBT2,SFN,SH3YL1,SKP1,SLC5A1,SLK,SMAP1,SMG5,SMG7,SMTN,SMURF2,SNX1,ST K4,SUB1,SULT1A1,SYT13,TAF13,THBS2,TJP1,TLR4,TRIM21,TTR,UEVLD,USP19,UTRN,VAV3,WEE1,WHR N,WWP1,XIAP,YWHAQ,YY1,ZEB2,ZFP28,ZIC3,ZNF292,ZNF462                                                                                                                                                                                                                                                                                                                                                                                                                      |

|     |                                                |                                                                         |          |     |                                                                                                                                                                                                                                                                                                                                                                                                                                                                                                                                                                                                                                                                                                                                                                                                                                                                                                                                                                   |
|-----|------------------------------------------------|-------------------------------------------------------------------------|----------|-----|-------------------------------------------------------------------------------------------------------------------------------------------------------------------------------------------------------------------------------------------------------------------------------------------------------------------------------------------------------------------------------------------------------------------------------------------------------------------------------------------------------------------------------------------------------------------------------------------------------------------------------------------------------------------------------------------------------------------------------------------------------------------------------------------------------------------------------------------------------------------------------------------------------------------------------------------------------------------|
| 120 | Cell death of breast cancer cell lines         | Cell Death and Survival                                                 | 1.90E,09 | 27  | AR,B2M,BTK,BTRC,CTCF,EP300,ESR1,FAS,FHIT,FN1,HK2,HMOX1,HSP90AB1,IFNG,IGF1R,IQUB,KIF11,MSH2,MUC1,NCOA3,NOTCH1,PA2G4,PDHA1,PPARG,RAC1,SFN,XIAP                                                                                                                                                                                                                                                                                                                                                                                                                                                                                                                                                                                                                                                                                                                                                                                                                      |
| 121 | Cell proliferation of breast cancer cell lines | Cellular Development,Cellular Growth and Proliferation                  | 2.25E,09 | 34  | AR,CHKA,CTCF,DTYMK,EP300,ERBB4,ESR1,F3,FAS,FN1,HAT1,HBEGF,HK2,IFNG,IGF1R,ITGB3,MAPK6,MATK,MEMO1,MTAP,NCOA3,PA2G4,PPARG,PPP2R1A,PRKCB,PTK2B,PTPRE,RAC1,RARA,SFN,TRIM21,UTRN,YWHAQ,YY1                                                                                                                                                                                                                                                                                                                                                                                                                                                                                                                                                                                                                                                                                                                                                                              |
| 122 | Stage IV solid tumor                           | Cancer,Organismal Injury and Abnormalities                              | 2.30E,09 | 17  | ALB,ALK,AR,BTK,CSF2RB,CYP17A1,ERBB4,ESR1,FCGR2A,GART,HSP90AB1,IGF1R,PARP3,PTK2B,RARA,RARG,RRM1                                                                                                                                                                                                                                                                                                                                                                                                                                                                                                                                                                                                                                                                                                                                                                                                                                                                    |
| 123 | Female genital tract cancer                    | Cancer,Organismal Injury and Abnormalities,Reproductive System Disease  | 2.57E,09 | 168 | AASDHPPT,ACACB,ACADSB,ACBD7,ACY1,ALB,ALK,ANG,AOC3,APPL1,AR,ARF6,ARHGFE1,ASAP1,ATP7B,B2M,B3GAT2,BCR,BTK,BTRC,C8A,CA8,CD1A,CD74,CLCN5,CLK1,CSDE1,CSF2RB,CSNK1G1,CSTF2,CTCF,CUL1,CYP7A1,DCTD,DHPS,DMC1,DOK2,DPP4,DTYMK,EP300,EPA3,ERBB4,ESR1,ETF1,F2,F3,FABP7,FAP,FAS,FCGR2A,FLNB,FN1,G6PD,GAD2,GART,GC,GRHPR,GRK2,GTF2I,HBB,HBEGF,HCK,HDX,HMBOX1,HMGB3,HMOX1,HNRNPA2B1,HPD,HSD17B4,HSP90AB1,HTR1A,IFNGR1,IGF1R,IQUB,ITGB3,ITPA,ITPKC,ITSN1,KIF11,LRBA,MAGEA4,MAGI2,MAP3K3,MAPK6,MARF1,MARK1,MDH1,MEMO1,MMP1,MMP2,MSH2,MSN,MUC1,MYBPC3,MYSM1,NAE1,NBEA,NCBP1,NCOA3,NF2,NFATC1,NMRK1,NMT1,NOTCH1,NR1I3,NT5C3A,NUP214,OAT,ODC1,PANK1,PARN,PARP3,PATJ,PC,PDK3,PGK1,POU2F1,PPARG,PPP2R1A,PRKCB,PTPRE,PTPRF,PYGL,RAC1,RARA,RARG,RBBP6,RBM39,RGS6,RND1,RRM1,RTN4IP1,RUVBL1,SAR,ST3,SENP2,SERPINA5,SF3B6,SFMBT2,SH3YL1,SKP1,SLC5A1,SLK,SMG5,SMTN,SMURF2,SNX1,STK4,SUB1,SULT1A1,SYT13,THBS2,TJP1,TLR4,TRIM21,TTR,UEVLD,UTRN,VAV3,WWP1,XIAP,YY1,ZEB2,ZFP28,ZIC3,ZNF292,ZNF462 |
| 124 | Cell movement                                  | Cellular Movement                                                       | 2.88E,09 | 71  | ALB,ALOX12,AOC3,APPL1,AR,ARF6,ARHGFE1,ASAP1,BTK,CD74,CERT1,CUL1,DAPK2,DGKA,DOK2,DPP4,ERBB4,ESR1,F2,F3,FABP7,FAP,FAS,FCGR2A,FHIT,FLNB,FN1,GC,GRK6,GTF2I,HBEGF,HMOX1,HNRNPA2B1,IFNG,IGF1R,ITGB3,MAPK6,MATK,MMP1,MMP2,MSN,MUC1,NCOA3,NF2,NFATC1,NOTCH1,PA2G4,PATJ,PPARG,PRKCB,PTK2B,PTPRF,RAC1,RARG,RUVBL1,SEMA4D,SERPINA5,SFN,SLK,STARD13,STK4,THBS2,TJP1,TLR4,VAV3,VEGFB,WARS1,XIAP,YARS1,YY1,ZEB2                                                                                                                                                                                                                                                                                                                                                                                                                                                                                                                                                                 |
| 125 | Transactivation of RNA                         | Gene Expression                                                         | 2.89E,09 | 27  | ACACB,APPL1,AR,ARHGFE1,BCR,BTRC,CIAO1,DPP4,EP300,ERBB4,ESR1,GTF2I,IFNG,ITSN1,NCOA3,NFATC1,NOTCH1,NR1I3,POU2F1,PPARG,RAC1,RARA,RARG,SUB1,XIAP,YWHAQ,YY1                                                                                                                                                                                                                                                                                                                                                                                                                                                                                                                                                                                                                                                                                                                                                                                                            |
| 126 | Invasion of tumor cell lines                   | Cellular Movement                                                       | 3.13E,09 | 46  | APEX1,AR,ARF6,ASAP1,CD74,CDK5R1,CTCF,DGKA,DPP4,ERBB4,ESR1,F2,F3,FAP,FAS,FHIT,FN1,HBEGF,HMOX1,HNRNPA2B1,HSP90AB1,IFNG,IGF1R,ITGB3,MAPK6,MATK,MMP1,MMP2,MUC1,NCOA3,NOTCH1,PA2G4,PPARG,PTK2B,RAC1,RARG,RUVBL1,S100A6,SFN,SMURF2,TJP1,VEGFB,VPS26A,XIAP,YWHAQ,YY1,ZEB2                                                                                                                                                                                                                                                                                                                                                                                                                                                                                                                                                                                                                                                                                                |
| 127 | Refractory tumor                               | Cancer,Organismal Injury and Abnormalities                              | 3.68E,09 | 20  | ALB,ALK,AR,BCR,BTK,ERBB4,ESR1,GART,GGPS1,HCK,HDAC7,HMOX1,HSP90AB1,IMPDH1,PARP3,PTK2B,RARA,RARG,RRM1,VEGFB                                                                                                                                                                                                                                                                                                                                                                                                                                                                                                                                                                                                                                                                                                                                                                                                                                                         |
| 128 | Renal cell carcinoma                           | Cancer,Organismal Injury and Abnormalities,Renal and Urological Disease | 3.75E,09 | 57  | ACACB,ALB,AR,ASAP1,ATXN3,B2M,BTRC,CANT1,CSF2RB,CTCF,CYP17A1,ECHS1,EP300,EPA3,ERBB4,ESR1,FAP,FN1,G6PD,GGPS1,GRHPR,HBB,HLA,DRB1,HSD17B4,HSP90AB1,IGF1R,IMPDH1,ITGB3,KIF11,KLK1,MMP2,MSH2,MUC1,MYBPC1,NCOA3,NF2,NOTCH1,NR1I3,NUP214,PANK1,PDK4,PPARG,PPP2R1A,PTPRE,PYGL,RARA,RBP5,RRM1,SMG7,SMTN,SULT1A1,TJP1,TLR4,ZCWPW1,ZEB2,ZNF292,ZNF462                                                                                                                                                                                                                                                                                                                                                                                                                                                                                                                                                                                                                         |
| 129 | Progressive metastatic solid tumor             | Cancer,Organismal Injury and Abnormalities,Tumor Morphology             | 4.17E,09 | 14  | ALK,AR,CSF2RB,CYP17A1,ERBB4,ESR1,F3,GART,HSP90AB1,IGF1R,PARP3,PTK2B,RRM1,VEGFB                                                                                                                                                                                                                                                                                                                                                                                                                                                                                                                                                                                                                                                                                                                                                                                                                                                                                    |
| 130 | Ductal carcinoma                               | Cancer,Organismal Injury and Abnormalities                              | 4.67E,09 | 106 | ACACB,ACAT2,ACY1,ADH1C,ALB,ALK,APPL1,AR,ATP7B,BPI,BTK,BTRC,CAMK4,CDK5R1,CHKA,CLK1,CRYM,CSDE1,CSNK1G1,CSTF2,CTCF,DAPK2,DCTD,DDFA,DPP4,DSG2,EP300,EPA3,EP8L2,ERBB4,ESR1,F2,F3,FAP,FLNB,FN1,GC,GRHPR,GRK2,GRK6,GTF2I,HCK,HDAC7,HLA,DRB1,HMGCS1,HPD,HSP90AB1,IFNGR1,IGF1R,ITPKC,ITSN1,KIF11,KMT5A,LRBA,MAGI2,MAPK6,MARK1,MMP2,MSH2,MSN,MUC1,MYBPC1,MYBPC3,NAE1,NBEA,NCOA3,NDC80,NF2,NFATC1,NOTCH1,NUP214,OXSR1,PA2G4,PARP3,PC,PDHA1,PDK3,PDK4,PGK1,PHF24,POT1,POU2F1,PPP2R1A,PRKCB,PTPRE,PTPRF,RAC1,RARA,RBBP6,RBM39,RRM1,SENP2,SFN,SH2B2,SLK,SMURF2,TJP1,TLR4,TRIM21,UEVLD,UTRN,VAV3,WEE1,ZEB2,ZFP28,ZNF292                                                                                                                                                                                                                                                                                                                                                          |
| 131 | Renal clear cell adenocarcinoma                | Cancer,Organismal Injury and                                            | 5.31E,09 | 48  | ACACB,ALB,AR,ASAP1,ATXN3,BTRC,CANT1,CSF2RB,CTCF,CYP17A1,ECHS1,EP300,EPA3,ERBB4,FAP,FN1,GRHPR,HBB,HLA,DRB1,HSD17B4,IGF1R,IMPDH1,ITGB3,KIF11,KLK1,MMP2,MUC1,MYBPC1,NCOA3,N                                                                                                                                                                                                                                                                                                                                                                                                                                                                                                                                                                                                                                                                                                                                                                                          |

|     |                                            |                                                                                    |          |     |                                                                                                                                                                                                                                                                                                                                                                                                                                                                                                                                                                                                                                                                                                                                                                                                                                                                                                                                                                                                                                                                                                                                                                                                                                                                                                                                                                                                                                                                         |
|-----|--------------------------------------------|------------------------------------------------------------------------------------|----------|-----|-------------------------------------------------------------------------------------------------------------------------------------------------------------------------------------------------------------------------------------------------------------------------------------------------------------------------------------------------------------------------------------------------------------------------------------------------------------------------------------------------------------------------------------------------------------------------------------------------------------------------------------------------------------------------------------------------------------------------------------------------------------------------------------------------------------------------------------------------------------------------------------------------------------------------------------------------------------------------------------------------------------------------------------------------------------------------------------------------------------------------------------------------------------------------------------------------------------------------------------------------------------------------------------------------------------------------------------------------------------------------------------------------------------------------------------------------------------------------|
|     |                                            | Abnormalities, Renal and Urological Disease                                        |          |     | F2, NOTCH1, NR1I3, NUP214, PANK1, PDK4, PPP2R1A, PTPRE, PYGL, RARA, RBP5, SMG7, SMTN, SULT1A1, TJP1, TLR4, ZCWPW1, ZNF292, ZNF462                                                                                                                                                                                                                                                                                                                                                                                                                                                                                                                                                                                                                                                                                                                                                                                                                                                                                                                                                                                                                                                                                                                                                                                                                                                                                                                                       |
| 132 | Binding of tumor cell lines                | Cell, To, Cell Signaling and Interaction                                           | 5.54E,09 | 27  | AR, ARHGEF1, DPP4, DSG2, ESR1, F2, F3, FAS, FCGR2A, FN1, GRK6, HCK, IFNG, IGF1R, ITGB3, MMP2, MUC1, NOTCH1, PPARG, PTK2B, RAC1, SERPINA5, SNX1, TJP1, TLR4, UTRN, ZEB2                                                                                                                                                                                                                                                                                                                                                                                                                                                                                                                                                                                                                                                                                                                                                                                                                                                                                                                                                                                                                                                                                                                                                                                                                                                                                                  |
| 133 | Invasion of cells                          | Cellular Movement                                                                  | 6.07E,09 | 48  | APEX1, AR, ARF6, ASAP1, CD74, CDK5R1, CTCF, DGKA, DPP4, ERBB4, ESR1, F2, F3, FAP, FAS, FHIT, FN1, HBEGF, HMOX1, HNRNPA2B1, HSP90AB1, IFNG, IGF1R, ITGB3, MAPK6, MATK, MMP1, MMP2, MUC1, NCOA3, NOTCH1, PA2G4, PPARG, PTK2B, RAC1, RARG, RUVBL1, S100A6, SFN, SMURF2, THBS2, TJP1, VEGFB, VPS26A, XIAP, YWHAQ, YY1, ZEB2                                                                                                                                                                                                                                                                                                                                                                                                                                                                                                                                                                                                                                                                                                                                                                                                                                                                                                                                                                                                                                                                                                                                                 |
| 134 | Anemia                                     | Cardiovascular Disease, Hematological Disease, Organismal Injury and Abnormalities | 6.60E,09 | 24  | ACADVL, ALK, AR, CSF2RB, DPP4, EP300, ESR1, F3, FAS, FCGR2A, G6PD, GRHPR, HBB, HMOX1, IFNG, IMPDH1, ITPA, KLK1, NT5C3A, PTPRE, RARA, RARG, RRM1, TAF13                                                                                                                                                                                                                                                                                                                                                                                                                                                                                                                                                                                                                                                                                                                                                                                                                                                                                                                                                                                                                                                                                                                                                                                                                                                                                                                  |
| 135 | Genitourinary carcinoma                    | Cancer, Organismal Injury and Abnormalities                                        | 7.05E,09 | 213 | AASDHPPT, ACACB, ACADSB, ACADVL, ACBD7, ACY1, ALB, ALK, ANXA6, AOC3, APEX1, APPL1, AR, ARF6, ARHGAP5, ARHGEF1, ASAP1, ATP7B, ATXN3, B2M, B3GAT2, BCR, BMP1, BTK, BTRC, C8A, CA8, CAMK4, CANT1, CD1A, CLCN5, CLK1, CSDE1, CSF2RB, CSNK1G1, CSTF2, CTCF, CUL1, CYP17A1, CYP2E1, CYP7A1, DAPK2, DCTD, DGKA, DHPS, DMC1, DOK2, DPP4, DTYMK, ECHS1, EP300, EPHA3, EPS8L2, ERBB4, ESR1, ETF1, EXOSC9, F2, F3, FAP, FAS, FCGR2A, FLNB, FN1, G6PD, GAD2, GALM, GALNT10, GART, GC, GGPS1, GRHPR, GRK2, GRK6, GTF2I, HASPIN, HAT1, HBB, HBEGF, HCK, HDAC7, HDX, HLA, DRB1, HMBOX1, HMGB3, HMGS1, HNRNPA2B1, HSD17B4, HSP90AB1, HTR1A, IFNG, IFNGR1, IGF1R, IMPDH1, IQUB, ITGB3, ITPA, ITPKC, ITSN1, KIF11, KLK1, KMT5A, KYNU, LRBA, MAGEA4, MAGI2, MAP3K3, MAPK6, MARF1, MARK1, MATK, MDH1, MEMO1, MMP1, MMP2, MSH2, MSN, MTAP, MUC1, MYBPC1, MYBPC3, MYSM1, NAE1, NBEA, NCBP1, NCOA3, NDC80, NF2, NFATC1, NMRK1, NMT1, NOTCH1, NR1I3, NT5C3A, NUP214, OAT, ODC1, OXSR1, PA2G4, PAFAH1B2, PAH, PANK1, PAPS1, PARN, PARP3, PATJ, PC, PDK3, PDK4, PGC, PGK1, PHF24, POU2F1, PPARG, PPP2R1A, PRKCB, PSAP, PTK2B, PTPRE, PTPRF, PYGL, RAC1, RARA, RARG, RBBP6, RBM39, RBP5, RGS6, RND1, RRM1, RTN4IP1, RUVBL1, SART3, SENP2, SERPINA5, SF3B6, SFMBT2, SFN, SH3YL1, SKP1, SLC5A1, SLK, SMAP1, SMG5, SMG7, SMTN, SMURF2, STK4, SUB1, SULT1A1, SYT13, THBS2, TJP1, TLR4, TRIM21, UEVLD, USP19, UTRN, VAV3, WEE1, WHRN, WWP1, XIAP, YWHAQ, YY1, ZCWPW1, ZEB2, ZFP28, ZIC3, ZNF292, ZNF462 |
| 136 | Migration of cells                         | Cellular Movement                                                                  | 8.58E,09 | 65  | ALB, ALOX12, AOC3, APPL1, AR, ARF6, ARHGEF1, ASAP1, BTK, CD74, CUL1, DAPK2, DOK2, DPP4, ESR1, F2, F3, FAP, FAS, FHIT, FLNB, FN1, GRK6, HBEGF, HMOX1, HNRNPA2B1, IFNG, IGF1R, ITGB3, MAPK6, MATK, MMP1, MMP2, MSN, MUC1, NCOA3, NF2, NFATC1, NOTCH1, PA2G4, PATJ, PPARG, PRKCB, PTK2B, PTPRF, RAC1, RARG, RUVBL1, SEMA4D, SERPINA5, SFN, SLK, STARD13, STK4, THBS2, TJP1, TLR4, VAV3, VEGFB, WARS1, XIAP, YARS1, YY1, ZEB2                                                                                                                                                                                                                                                                                                                                                                                                                                                                                                                                                                                                                                                                                                                                                                                                                                                                                                                                                                                                                                               |
| 137 | Breast or ovarian carcinoma                | Cancer, Organismal Injury and Abnormalities, Reproductive System Disease           | 9.68E,09 | 113 | ACACB, ALB, ALK, AR, ARF6, ARHGEF1, ASAP1, B2M, BCR, BTK, CA8, CAMK4, CLK1, CSDE1, CSF2RB, CSNK1G1, CSTF2, CTCF, DAPK2, DPP4, EP300, EPHA3, ERBB4, ESR1, EXOSC9, F2, FAP, FLNB, FN1, GALNT10, GART, GGPS1, GRK2, GRK6, HAT1, HBEGF, HCK, HDAC7, HLA, DRB1, HMGS1, HNRNPA2B1, HSP90AB1, HTR1A, IFNGR1, IGF1R, ITGB3, ITPA, ITPKC, ITSN1, KIF11, KMT5A, MAGEA4, MAGI2, MAP3K3, MAPK6, MARF1, MARK1, MMP2, MSH2, MSN, MUC1, MYBPC3, NBEA, NCOA3, NDC80, NF2, NFATC1, NOTCH1, NR1I3, NT5C3A, ODC1, OXSR1, PAFAH1B2, PARP3, PC, PDK3, PDK4, PGC, PHF24, POU2F1, PPARG, PPP2R1A, PRKCB, PTPRE, PTPRF, PYGL, RAC1, RARA, RBBP6, RBM39, RRM1, RTN4IP1, SENP2, SERPINA5, SFMBT2, SH3YL1, SKP1, SLC5A1, SLK, SMG7, SMTN, SMURF2, SYT13, THBS2, TLR4, USP19, UTRN, VAV3, WEE1, WWP1, YWHAQ, ZEB2, ZNF462                                                                                                                                                                                                                                                                                                                                                                                                                                                                                                                                                                                                                                                                           |
| 138 | Cytolysis                                  | Cell Death and Survival                                                            | 1.05E,08 | 17  | ALB, B2M, C8A, DPP4, F3, FAS, FCGR2A, G6PD, HBB, HMOX1, IFNG, IMPDH1, ITPA, MSH2, MUC1, NT5C3A, TLR4                                                                                                                                                                                                                                                                                                                                                                                                                                                                                                                                                                                                                                                                                                                                                                                                                                                                                                                                                                                                                                                                                                                                                                                                                                                                                                                                                                    |
| 139 | Refractory malignant tumor                 | Cancer, Organismal Injury and Abnormalities                                        | 1.12E,08 | 19  | ALB, ALK, AR, BCR, BTK, ERBB4, ESR1, GART, HCK, HDAC7, HMOX1, HSP90AB1, IMPDH1, PARP3, PTK2B, RARA, RARG, RRM1, VEGFB                                                                                                                                                                                                                                                                                                                                                                                                                                                                                                                                                                                                                                                                                                                                                                                                                                                                                                                                                                                                                                                                                                                                                                                                                                                                                                                                                   |
| 140 | Cell death of pancreatic cancer cell lines | Cell Death and Survival                                                            | 1.17E,08 | 13  | BTRC, FAS, FHIT, FN1, HBEGF, IFNG, IGF1R, NOTCH1, PDK2, RRM1, SFN, VAV3, XIAP                                                                                                                                                                                                                                                                                                                                                                                                                                                                                                                                                                                                                                                                                                                                                                                                                                                                                                                                                                                                                                                                                                                                                                                                                                                                                                                                                                                           |
| 141 | Melanoma                                   | Cancer, Organismal Injury and Abnormalities                                        | 1.23E,08 | 222 | ACACB, ACADSB, ACSM2A, ADH7, ALB, ALK, ALOX12, AMY1C (includes others), ANG, AOC3, APEX1, APPL1, AR, ARHGAP5, ARHGEF1, ASAP1, ATP7B, ATXN3, B2M, B3GAT2, BCR, BMP1, BPI, BTK, BTRC, C1R, C8A, CA8, CAMK4, CANT1, CD1A, CD74, CHKA, CIAO1, CLCN5, CLK1, CRYM, CSDE1, CSF2RB, CSNK1G2, CSTF2, CTCF, CUL1, CYP17A1, CYP2E1, CYP2R1, CYP7A1, DAPK2, DCTD, DFFA, DGKA, DHPS, D                                                                                                                                                                                                                                                                                                                                                                                                                                                                                                                                                                                                                                                                                                                                                                                                                                                                                                                                                                                                                                                                                               |

|     |                               |                                                                                           |          |     |                                                                                                                                                                                                                                                                                                                                                                                                                                                                                                                                                                                                                                                                                                                                                                                                                                                                                                                                                                                                                                                                                                                                                                                                                                                                                                                                                                                                                                                                                                                                                                                                                                   |
|-----|-------------------------------|-------------------------------------------------------------------------------------------|----------|-----|-----------------------------------------------------------------------------------------------------------------------------------------------------------------------------------------------------------------------------------------------------------------------------------------------------------------------------------------------------------------------------------------------------------------------------------------------------------------------------------------------------------------------------------------------------------------------------------------------------------------------------------------------------------------------------------------------------------------------------------------------------------------------------------------------------------------------------------------------------------------------------------------------------------------------------------------------------------------------------------------------------------------------------------------------------------------------------------------------------------------------------------------------------------------------------------------------------------------------------------------------------------------------------------------------------------------------------------------------------------------------------------------------------------------------------------------------------------------------------------------------------------------------------------------------------------------------------------------------------------------------------------|
|     |                               |                                                                                           |          |     | MC1,DOK2,DPP4,DSG2,ECI2,EP300,EPA3,EP8L2,ERBB4,ESR1,EXOSC9,F2,F3,FABP3,FAP,FAS,FCGR2A, FHIT,FLNB, FN1, GAD2, GALM, GALNT10, GART, GC, GGPS1, GRHPR, GRK2, GTF2I, HADH, HASPIN, HAT1, HBB, HBEGF, HCK, HDAC7, HDX, HK2, HLA, DRB1, HMGC1, HMOX1, HNRNPA2B1, HPD, HSCB, HSD17B10, HSD17B4, HSP90AB1, HTR1A, IFNG, IFNGR1, IGF1R, IMPA2, IMPDH1, IQUB, ITGB3, ITPA, ITPK1, ITPKC, ITSN1, KLK1, KMT5A, KYNU, LRBA, MAGEA4, MAGI2, MARF1, MARK1, MATK, MDH1, MECR, MEMO1, MMP1, MMP2, MSH2, MSN, MUC1, MYBPC1, MYBPC3, NBEA, NCBP1, NCOA3, NF2, NFATC1, NOTCH1, NR1I3, NSUN5, NUP214, OAT, ODC1, OXSR1, PA2G4, PAFAH1B2, PAH, PANK1, PAPSS1, PARN, PARP3, PATJ, PC, PCYT2, PDHA1, PDK2, PDK3, PDK4, PEX5, PGC, PGK1, PHF24, POT1, POU2F1, PPARG, PPP2R1A, PRKCB, PSAP, PTK2B, PTPRE, PTPRF, PYGL, RAC1, RARA, RARG, RBBP6, RBP5, RGS6, RND1, RPA3, RRM1, RTN4IP1, RUVBL1, SART3, SEC23A, SEM1, SEMA4D, SENP2, SERPINA5, SFMBT2, SH2B2, SH3YL1, SKP1, SLC5A1, SLK, SMAP1, SMG5, SMG7, SMTN, SMURF2, STARD13, STK4, SULT1A1, SYT13, TAF13, THBS2, TIMM9, TJP1, TLR4, TRIM21, USP19, UTRN, VAV3, VEGFB, WHRN, WWP1, XIAP, XRCC6, YY1, ZCWPW1, ZEB2, ZFP28, ZNF292, ZNF462                                                                                                                                                                                                                                                                                                                                                                                                                                                                 |
| 142 | Metastatic adenocarcinoma     | Cancer, Organismal Injury and Abnormalities                                               | 1.31E,08 | 16  | ALB, ALK, AR, CYP17A1, ERBB4, ESR1, F3, FAS, GART, HSP90AB1, IGF1R, MUC1, NR1I3, PARP3, PTK2B, RRM1                                                                                                                                                                                                                                                                                                                                                                                                                                                                                                                                                                                                                                                                                                                                                                                                                                                                                                                                                                                                                                                                                                                                                                                                                                                                                                                                                                                                                                                                                                                               |
| 143 | Plasma cell dyscrasia         | Cancer, Hematological Disease, Immunological Disease, Organismal Injury and Abnormalities | 1.36E,08 | 35  | ANXA6, B2M, BCR, BTK, CLK1, CSF2RB, ECI2, EP300, FAS, FN1, GART, GGPS1, GRHPR, GTF2I, HAT1, HLA, DRB1, HMOX1, HSP90AB1, IFNG, IMPDH1, ITGB3, ITPK1, MMP2, NAE1, NDC80, NFATC1, PRKCB, PTK2B, PTPRE, PTPRF, RAC1, RARA, RRM1, SNX1, XRCC6                                                                                                                                                                                                                                                                                                                                                                                                                                                                                                                                                                                                                                                                                                                                                                                                                                                                                                                                                                                                                                                                                                                                                                                                                                                                                                                                                                                          |
| 144 | Lung tumor                    | Cancer, Organismal Injury and Abnormalities, Respiratory Disease                          | 1.50E,08 | 135 | ACAT2, ADH1C, ADH7, ALB, ALK, ALOX12, ANXA6, APEX1, AR, ARHGAP5, ARHGEF1, B2M, B3GAT2, BMP1, BTBK, BTRC, C8A, CA8, CAMK4, CD1A, CERT1, CLCN5, CLK1, CSF2RB, CSNK1G2, CTCF, CUL1, CYP17A1, CYP2E1, DGKA, DOK2, DPP4, DSG2, EP300, EPA3, ERBB4, ESR1, F2, F3, FAP, FAS, FHIT, FN1, GAD2, GALNT10, GART, GGPS1, GRHPR, GRK6, GTF2I, HASPIN, HCK, HDX, HK2, HMGB3, HMOX1, HNRNPA2B1, HPD, HSD17B4, HSP90AB1, HTR1A, IFNG, IFNGR1, IGF1R, IQUB, ITPKC, KIF11, KYNU, LRBA, MAGEA4, MAGI2, MAPK6, MATK, MDH1, MMP1, MMP2, MSH2, MSN, MTAP, MUC1, MYBPC1, NBEA, NCOA3, NDC80, NF2, NMT1, NOTCH1, NT5C3A, OAT, ODC1, OXSR1, PAH, PANK1, PARP3, PATJ, PDHA1, PDK4, PEX5, PGC, PGK1, PIP4K2C, POT1, PPARG, PPP2R1A, PRKCB, PTK2B, PTPRE, PTPRF, PYGL, RAC1, RARA, RARG, RBBP6, RGS6, RRM1, SEMA4D, SENP2, SERPINA5, SFN, SKP1, SLK, SMG7, SMURF2, STK4, SULT1A1, THBS2, TJP1, TLR4, TTR, TXNDC12, UTRN, VAV3, WWP1, ZCWPW1, ZNF292                                                                                                                                                                                                                                                                                                                                                                                                                                                                                                                                                                                                                                                                                                           |
| 145 | Chronic inflammatory disorder | Inflammatory Disease                                                                      | 1.54E,08 | 52  | ALB, ALK, ALOX12, ANG, ASAP1, B2M, BTK, CD1A, CD74, CSF2RB, CYP2E1, DPP4, EP300, ERI1, ESR1, F2, F3, FAS, FCGR2A, FN1, G6PD, GC, GGPS1, GRHPR, HBEGF, HCK, HDAC7, HLA, DRB1, HMOX1, IDE, IFNG, IFNGR1, IGF1R, IMPDH1, ITGB3, ITPA, MMP1, MMP2, MTAP, MUC1, PGK1, PPARG, PTK2B, PTPRE, RGS6, RRM1, SF3B6, SMG7, TAF13, TJP1, TLR4, XIAP                                                                                                                                                                                                                                                                                                                                                                                                                                                                                                                                                                                                                                                                                                                                                                                                                                                                                                                                                                                                                                                                                                                                                                                                                                                                                            |
| 146 | Adenocarcinoma                | Cancer, Organismal Injury and Abnormalities                                               | 1.85E,08 | 258 | AASDHPPT, ACACB, ACADSB, ACADVL, ACAT2, ACBD7, ACSM2A, ACVR2B, ACY1, ADH1C, ADH7, ALB, ALK, ALOX12, ANXA6, AOC3, APEX1, APPL1, AR, ARF6, ARHGAP5, ARHGEF1, ASAP1, ATP7B, ATXN3, B2M, B3GAT2, BCR, BMP1, BPI, BTK, BTRC, C1R, C8A, CA8, CAMK4, CANT1, CD1A, CD74, CDK5R1, CERT1, CHKA, CLCN5, CLK1, CRYM, CSDE1, CSF2RB, CSNK1G1, CSNK1G2, CSTF2, CTCF, CUL1, CYP17A1, CYP2E1, CYP7A1, DAPK2, DCTD, DCXR, DFFA, DGKA, DHPS, DMC1, DOK2, DPP4, DSG2, DTYMK, ECHS1, EP300, EPA3, EP8L2, ERBB4, ESR1, ET F1, EXOSC9, F2, F3, FAP, FAS, FCGR2A, FHIT, FLNB, FN1, G6PD, GAD2, GALM, GALNT10, GART, GC, GGPS1, GRHPR, GRK2, GRK6, GTF2I, HADH, HASPIN, HBB, HBEGF, HCK, HDAC7, HDX, HIBCH, HK2, HLA, DRB1, HMOX1, HMGB3, HMGC1, HMOX1, HNRNPA2B1, HPD, HSCB, HSD17B10, HSD17B4, HSP90AB1, HTR1A, IDE, IFNG, IFNGR1, IGF1R, IMPA2, IMPDH1, IQUB, ITGB3, ITPA, ITPK1, ITPKC, ITSN1, KIF11, KLK1, KMT5A, KYNU, LRBA, MAGEA4, MAGI2, MAP3K3, MAPK6, MARF1, MARK1, MATK, MDH1, MECR, MEMO1, MMP1, MMP2, MSH2, MSN, MTAP, MUC1, MYBPC1, MYBPC3, MYSM1, NAE1, NBEA, NCBP1, NCOA3, NDC80, NF2, NFATC1, NMRK1, NMT1, NOTCH1, NR1I3, NSUN5, NT5C3A, NUP214, OAT, ODC1, OXSR1, PA2G4, PAFAH1B2, PAH, PANK1, PAPSS1, PARN, PARP3, PATJ, PC, PCYT2, PDHA1, PDK2, PDK3, PDK4, PGC, PGK1, PHF24, PIP4K2C, POT1, POU2F1, PPARG, PPP2R1A, PRKCB, PTK2B, PTPRE, PTPRF, PUS10, PYGL, RAB26, RAC1, RARA, RARG, RBBP6, RBM39, RBP5, RGS6, RND1, RRM1, RTN4IP1, RUVBL1, SART3, SEC23A, SEMA4D, SENP2, SERPINA5, SF3B6, SFMBT2, SFN, SH2B2, SH3YL1, SKP1, SLC5A1, SLK, SMAP1, SMG5, SMG7, SMTN, SMURF2, SNX1, SPEF1, STARD13, STK16, STK4, SUB1, SULT1A1, SYT13 |

|     |                                       |                                                                                                   |          |     |                                                                                                                                                                                                                                                                                                                                                                                                                                                                                                                                                                                                                                                                                                                                                                                                                                                                                                                                                                                                                                                      |
|-----|---------------------------------------|---------------------------------------------------------------------------------------------------|----------|-----|------------------------------------------------------------------------------------------------------------------------------------------------------------------------------------------------------------------------------------------------------------------------------------------------------------------------------------------------------------------------------------------------------------------------------------------------------------------------------------------------------------------------------------------------------------------------------------------------------------------------------------------------------------------------------------------------------------------------------------------------------------------------------------------------------------------------------------------------------------------------------------------------------------------------------------------------------------------------------------------------------------------------------------------------------|
|     |                                       |                                                                                                   |          |     | , THBS2, TJP1, TLR4, TRIM21, TTR, UEVLD, USP19, UTRN, VAV3, VEGFB, VPS26A, WEE1, WHRN, WWP1, XIAP, XRCC6, YWHAH, YY1, ZBTB43, ZCWPW1, ZEB2, ZFP28, ZIC3, ZNF292, ZNF462                                                                                                                                                                                                                                                                                                                                                                                                                                                                                                                                                                                                                                                                                                                                                                                                                                                                              |
| 147 | Lung cancer                           | Cancer, Organismal Injury and Abnormalities, Respiratory Disease                                  | 2.01E,08 | 134 | ACAT2, ADH1C, ADH7, ALB, ALK, ALOX12, ANXA6, APEX1, AR, ARHGAP5, ARHGEF1, B2M, B3GAT2, BMP1, BTK, BTRC, C8A, CA8, CAMK4, CD1A, CERT1, CLCN5, CLK1, CSF2RB, CSNK1G2, CTCF, CUL1, CYP17A1, CYP2E1, DGKA, DOK2, DPP4, DSG2, EP300, EPHA3, ERBB4, ESR1, F2, F3, FAP, FAS, FHIT, FN1, GAD2, GALNT10, GART, GGPS1, GRHPR, GRK6, GTF2I, HASPIN, HCK, HDX, HK2, HMGB3, HNRNPA2B1, HPD, HSD17B4, HSP90AB1, HTR1A, IFNG, IFNGR1, IGF1R, IQUB, ITPKC, KIF11, KYNU, LRBA, MAGEA4, MAGI2, MAPK6, MATK, MDH1, MMP1, MMP2, MSH2, MSN, MTAP, MUC1, MYBPC1, NBEA, NCOA3, NDC80, NF2, NMT1, NOTCH1, NT5C3A, OAT, ODC1, OXSR1, PAH, PANK1, PARP3, PATJ, PDHA1, PDK4, PEX5, PGC, PGK1, PIP4K2C, POT1, PPARG, PPP2R1A, PRKCB, PTK2B, PTPRE, PTPRF, PYGL, RAC1, RARA, RARG, RBBP6, RGS6, RRM1, SEMA4D, SENP2, SERPINA5, SFN, SKP1, SLK, SMG7, SMURF2, STK4, SULT1A1, THBS2, TJP1, TLR4, TTR, TXNDC12, UTRN, VAV3, WWP1, ZCWPW1, ZNF292                                                                                                                                     |
| 148 | Recurrent carcinoma                   | Cancer, Organismal Injury and Abnormalities                                                       | 2.16E,08 | 14  | ALB, ALK, AR, CYP17A1, ERBB4, ESR1, F3, GART, HSP90AB1, IGF1R, IMPDH1, PARP3, PTK2B, RRM1                                                                                                                                                                                                                                                                                                                                                                                                                                                                                                                                                                                                                                                                                                                                                                                                                                                                                                                                                            |
| 149 | Apoptosis of breast cancer cell lines | Cell Death and Survival                                                                           | 2.34E,08 | 23  | AR, B2M, BTK, BTRC, CTCF, EP300, ESR1, FAS, FHIT, FN1, HK2, HMOX1, IFNG, IGF1R, KIF11, MUC1, NCOA3, PA2G4, PDHA1, PPARG, RAC1, SFN, XIAP                                                                                                                                                                                                                                                                                                                                                                                                                                                                                                                                                                                                                                                                                                                                                                                                                                                                                                             |
| 150 | Acne vulgaris                         | Dermatological Diseases and Conditions, Inflammatory Disease, Organismal Injury and Abnormalities | 2.36E,08 | 7   | AR, DHPS, ESR1, G6PD, ODC1, RARA, RARG                                                                                                                                                                                                                                                                                                                                                                                                                                                                                                                                                                                                                                                                                                                                                                                                                                                                                                                                                                                                               |
| 151 | Apoptosis of cancer cells             | Cancer, Cell Death and Survival, Organismal Injury and Abnormalities, Tumor Morphology            | 2.77E,08 | 14  | ALB, AR, B2M, BTK, FAS, FHIT, HMOX1, IFNG, IGF1R, MUC1, NCOA3, RAC1, RARA, XIAP                                                                                                                                                                                                                                                                                                                                                                                                                                                                                                                                                                                                                                                                                                                                                                                                                                                                                                                                                                      |
| 152 | Interaction of DNA                    | Cell Cycle                                                                                        | 2.96E,08 | 24  | ALB, APEX1, AR, BTK, CYP2E1, EP300, ESR1, F2, F3, FN1, HCK, IFNG, MAP3K3, MUC1, NOTCH1, NR1I3, PARP3, POU2F1, PPARG, RAC1, RARA, STK4, TLR4, XRCC6                                                                                                                                                                                                                                                                                                                                                                                                                                                                                                                                                                                                                                                                                                                                                                                                                                                                                                   |
| 153 | Lung carcinoma                        | Cancer, Organismal Injury and Abnormalities, Respiratory Disease                                  | 3.13E,08 | 131 | ACAT2, ADH1C, ADH7, ALB, ALK, ALOX12, ANXA6, APEX1, AR, ARHGAP5, ARHGEF1, B2M, B3GAT2, BMP1, BTK, BTRC, C8A, CA8, CAMK4, CD1A, CERT1, CLCN5, CLK1, CSF2RB, CSNK1G2, CTCF, CUL1, CYP17A1, CYP2E1, DGKA, DOK2, DPP4, DSG2, EP300, EPHA3, ERBB4, ESR1, F2, F3, FAP, FAS, FHIT, FN1, GAD2, GALNT10, GART, GGPS1, GRHPR, GRK6, GTF2I, HASPIN, HCK, HDX, HK2, HMGB3, HNRNPA2B1, HPD, HSD17B4, HSP90AB1, HTR1A, IFNG, IFNGR1, IGF1R, IQUB, ITPKC, KIF11, KYNU, LRBA, MAGEA4, MAGI2, MAPK6, MATK, MDH1, MMP1, MMP2, MSH2, MSN, MTAP, MUC1, MYBPC1, NBEA, NCOA3, NDC80, NMT1, NOTCH1, NT5C3A, OAT, ODC1, OXSR1, PAH, PANK1, PARP3, PATJ, PDHA1, PDK4, PEX5, PGC, PGK1, PIP4K2C, POT1, PPARG, PPP2R1A, PRKCB, PTK2B, PTPRE, PTPRF, PYGL, RAC1, RARA, RARG, RBBP6, RGS6, RRM1, SEMA4D, SENP2, SERPINA5, SFN, SLK, SMG7, SMURF2, STK4, SULT1A1, THBS2, TJP1, TLR4, TTR, TXNDC12, VAV3, WWP1, ZCWPW1, ZNF292                                                                                                                                                      |
| 154 | Binding of lipid                      | Lipid Metabolism, Small Molecule Biochemistry                                                     | 3.24E,08 | 9   | BPI, ESR1, F2, FAS, HSP90AB1, NF2, PSAP, RARA, TLR4                                                                                                                                                                                                                                                                                                                                                                                                                                                                                                                                                                                                                                                                                                                                                                                                                                                                                                                                                                                                  |
| 155 | Extrapneumonic malignant tumor        | Cancer, Organismal Injury and Abnormalities                                                       | 3.33E,08 | 277 | AASDHPPT, ACACB, ACADSB, ACADVL, ACAT2, ACBD7, ACP3, ACSM2A, ACVR2B, ACY1, ADH1C, ADH7, ALB, ALK, ALOX12, AMY1C (includes others), ANG, ANXA6, AOC3, APEX1, APPL1, AR, ARF6, ARHGAP5, ARHGEF1, ASAP1, ATP7B, ATXN3, B2M, B3GAT2, BCR, BMP1, BPI, BTK, BTRC, C1R, C8A, CA8, CAMK4, CANT1, CD1A, CD74, CDK5R1, CERT1, CHKA, CIAO1, CLCN5, CLK1, CRYM, CSDE1, CSF2RB, CSNK1G1, CSNK1G2, CSTF2, CTCF, CUL1, CYP17A1, CYP2E1, CYP2R1, CYP7A1, DAPK2, DCTD, DCXR, DFFA, DGKA, DHPS, DMC1, DOK2, DPP4, DSG2, DTYMK, ECHS1, EC12, EP300, EPHA3, EPS8L2, ERBB4, ESR1, ETF1, EXOSC9, F2, F3, FAP7, FAP, FAS, FCGR2A, FHIT, FLNB, FN1, G6PD, GAD2, GALM, GALNT10, GART, GC, GGPS1, GRHPR, GRK2, GRK6, GTF2F2, GTF2I, HADH, HASPIN, HAT1, HBB, HBEGF, HCK, HDAC7, HDX, HIBCH, HK2, HLA, DRB1, HMBOX1, HMGB3, HMGCS1, HMOX1, HNRNPA2B1, HPD, HSCB, HSD17B10, HSD17B4, HSP90AB1, HTR1A, IDE, IFNG, IFNGR1, IGF1R, IMPA2, IMPDH1, IQUB, ITGB3, ITPA, ITPK1, ITPKC, ITS1, KIF11, KLK1, KMT5A, KYNU, LRBA, MAGEA4, MAGI2, MAP3K3, MAPK6, MARF1, MARK1, MATK, MDH1, ME |



|     |                                                    |                                                                                           |          |     |                                                                                                                                                                                                                                                                                                                                                                                                                                                                                                                                                                                                                                                                                                                                                                                                                                                                                                                                                                 |
|-----|----------------------------------------------------|-------------------------------------------------------------------------------------------|----------|-----|-----------------------------------------------------------------------------------------------------------------------------------------------------------------------------------------------------------------------------------------------------------------------------------------------------------------------------------------------------------------------------------------------------------------------------------------------------------------------------------------------------------------------------------------------------------------------------------------------------------------------------------------------------------------------------------------------------------------------------------------------------------------------------------------------------------------------------------------------------------------------------------------------------------------------------------------------------------------|
|     |                                                    |                                                                                           |          |     | CR, MEMO1, MMP1, MMP2, MSH2, MSN, MTAP, MUC1, MYBPC1, MYBPC3, MYSM1, NAE1, NBEA, NCBP1, NCOA3, NDC80, NF2, NFATC1, NME3, NMRK1, NMT1, NOTCH1, NR1I3, NSUN5, NT5C3A, NUP214, OAT, ODC1, OXSR1, PA2G4, PAFAH1B2, PAH, PANK1, PAPSS1, PARN, PARP3, PATJ, PC, PCYT2, PDHA1, PDK2, PDK3, PDK4, PEX5, PGC, PGK1, PHF24, PIP4K2C, POT1, POU2F1, PPARG, PPP2R1A, PRKCB, PSAP, PTK2B, PTPRE, PTPRF, PUS10, PYGL, RAB26, RAC1, RARA, RARG, RBBP6, RBM39, RBP5, RGS6, RND1, RRM1, RTN4IP1, RUVBL1, S100A6, SART3, SEC23A, SEM1, SEMA4D, SENP2, SERPINA5, SF3B6, SFMBT2, SFN, SH2B2, SH3YL1, SKP1, SLC5A1, SLK, SMAP1, SMG5, SMG7, SMTN, SMURF2, SNX1, SPEF1, STARD13, STK16, STK4, SUB1, SULT1A1, SYT13, TAF13, THBS2, TIMM9, TJP1, TLR4, TNFAIP8L2, TRIM21, TTR, TXNDC12, UEVLD, USP19, UTRN, VAV3, VEGFB, VPS26A, WEE1, WHRN, WWP1, XIAP, XRCC6, YWHAH, YWHAQ, YY1, ZBTB43, ZCWPW1, ZEB2, ZFP28, ZIC3, ZNF292, ZNF462                                                    |
| 156 | Apoptosis of prostate cancer cells                 | Cancer, Cell Death and Survival, Organismal Injury and Abnormalities, Tumor Morphology    | 3.42E,08 | 4   | AR, NCOA3, RARA, XIAP                                                                                                                                                                                                                                                                                                                                                                                                                                                                                                                                                                                                                                                                                                                                                                                                                                                                                                                                           |
| 157 | Glucose metabolism disorder                        | Metabolic Disease, Organismal Injury and Abnormalities                                    | 3.43E,08 | 44  | ACAT2, ALB, APPL1, AR, B2M, BPI, CYP2E1, CYP2R1, DPP4, ECHS1, ESR1, F2, F3, FAS, FCGR2A, FN1, GC, GGPS1, HADH, HBB, HK2, HMBX1, HTR1A, IDE, IFNG, IGF1R, IMPDH1, ITGB3, KIF11, MAGI2, NOTCH1, PDK4, PPARG, PRKCB, RAC1, SLC5A1, SMURF2, SUB1, TAF13, THBS2, TLR4, UTRN, VEGFB, ZEB2                                                                                                                                                                                                                                                                                                                                                                                                                                                                                                                                                                                                                                                                             |
| 158 | T, cell malignant neoplasm                         | Cancer, Hematological Disease, Immunological Disease, Organismal Injury and Abnormalities | 3.43E,08 | 38  | ALK, B2M, C1R, CD1A, CLK1, CTCF, DPP4, ECHS1, EP300, EPHA3, ERBB4, FAS, FHIT, FN1, GTF2I, HCK, HDAC7, HNRNPA2B1, HSP90AB1, IMPDH1, MARK1, MMP1, MMP2, MUC1, NFATC1, NOTCH1, NT5C3A, ODC1, POT1, POU2F1, PRKCB, PTPRE, RARA, RARG, RRM1, TAF13, TJP1, TLR4                                                                                                                                                                                                                                                                                                                                                                                                                                                                                                                                                                                                                                                                                                       |
| 159 | Advanced uterine cancer                            | Cancer, Organismal Injury and Abnormalities, Reproductive System Disease                  | 3.77E,08 | 10  | ALK, AOC3, AR, ESR1, F3, GAD2, GART, HSP90AB1, PARP3, RRM1                                                                                                                                                                                                                                                                                                                                                                                                                                                                                                                                                                                                                                                                                                                                                                                                                                                                                                      |
| 160 | Cell movement of tumor cell lines                  | Cellular Movement                                                                         | 4.08E,08 | 51  | ALOX12, APPL1, AR, ARF6, ARHGEF1, CERT1, DPP4, ESR1, F2, F3, FABP7, FHIT, FLNB, FN1, GC, GRK6, HBEGF, HMOX1, HNRNPA2B1, IFNG, IGF1R, ITGB3, MAPK6, MATK, MMP1, MMP2, MSN, MUC1, NCOA3, NF2, NOTCH1, PA2G4, PPARG, PRKCB, PTK2B, RAC1, RARG, RUVBL1, SEMA4D, SERPINA5, SFN, STARD13, THBS2, TLR4, VAV3, VEGFB, WARS1, XIAP, YARS1, YY1, ZEB2                                                                                                                                                                                                                                                                                                                                                                                                                                                                                                                                                                                                                     |
| 161 | Stage I, II cancer                                 | Cancer, Organismal Injury and Abnormalities                                               | 4.56E,08 | 17  | ALB, ALK, B2M, BTK, CSF2RB, ERBB4, ESR1, FN1, GART, GGPS1, HSP90AB1, MUC1, PGC, RARA, RARG, RRM1, ZEB2                                                                                                                                                                                                                                                                                                                                                                                                                                                                                                                                                                                                                                                                                                                                                                                                                                                          |
| 162 | Metabolism of nucleic acid component or derivative | Nucleic Acid Metabolism                                                                   | 4.80E,08 | 23  | ACACB, ACP3, CYP2E1, DCTD, F2, FHIT, G6PD, GRK2, HMOX1, HTR1A, IFNG, IMPDH1, ITPA, KYNU, MTAP, NMRK1, NT5C3A, PAPSS1, PDHA1, PGK1, PRKCB, SNX1, SULT1A1                                                                                                                                                                                                                                                                                                                                                                                                                                                                                                                                                                                                                                                                                                                                                                                                         |
| 163 | Respiratory system tumor                           | Cancer, Organismal Injury and Abnormalities, Respiratory Disease                          | 4.95E,08 | 141 | ACAT2, ADH1C, ADH7, ALB, ALK, ALOX12, ANXA6, APEX1, AR, ARHGAP5, ARHGEF1, B2M, B3GAT2, BMP1, BTK, BTRC, C8A, CA8, CAMK4, CD1A, CERT1, CLCN5, CLK1, CSF2RB, CSNK1G2, CTCF, CUL1, CYP17A1, CYP2E1, CYP2R1, DGKA, DOK2, DPP4, DSG2, EP300, EPHA3, ERBB4, ESR1, F2, F3, FAP, FAS, FHIT, FN1, GAD2, GALNT10, GART, GGPS1, GRHPR, GRK6, GTF2I, HASPIN, HCK, HDX, HK2, HMGB3, HMOX1, HNRNPA2B1, HPD, HSD17B4, HSP90AB1, HTR1A, IDE, IFNG, IFNGR1, IGF1R, IQUB, ITPKC, KIF11, KMT5A, KYNU, LRBA, MAGEA4, MAGI2, MAPK6, MATK, MDH1, MMP1, MMP2, MSH2, MSN, MTAP, MUC1, MYBPC1, NBEA, NCOA3, NDC80, NF2, NMT1, NOTCH1, NT5C3A, OAT, ODC1, OXSR1, PAH, PANK1, PARP3, PATJ, PDHA1, PDK2, PDK4, PEX5, PGC, PGK1, PIP4K2C, POT1, PPARG, PPP2R1A, PRKCB, PSAP, PTK2B, PTPRE, PTPRF, PYGL, RAC1, RARA, RARG, RBBP6, RGS6, RRM1, SEMA4D, SENP2, SERPINA5, SFN, SKP1, SLK, SMG7, SMURF2, STK4, SULT1A1, THBS2, TJP1, TLR4, TTR, TXNDC12, UTRN, VAV3, WWP1, ZCWPW1, ZNF292, ZNF462 |
| 164 | Binding of mononuclear leukocytes                  | Cell, To, Cell Signaling and Interaction, Hematological System Development and Function   | 5.26E,08 | 13  | AOC3, ARHGEF1, BPI, F2, FAS, FN1, IFNG, ITGB3, MSN, PPARG, PTK2B, RAC1, TLR4                                                                                                                                                                                                                                                                                                                                                                                                                                                                                                                                                                                                                                                                                                                                                                                                                                                                                    |

|     |                                          |                                                                |          |     |                                                                                                                                                                                                                                                                                                                                                                                                                                                                                                                                                                                                                                                                                                                                                                                                                                                                                                                                                                                                                                                                                                                                                                                                                                                                   |
|-----|------------------------------------------|----------------------------------------------------------------|----------|-----|-------------------------------------------------------------------------------------------------------------------------------------------------------------------------------------------------------------------------------------------------------------------------------------------------------------------------------------------------------------------------------------------------------------------------------------------------------------------------------------------------------------------------------------------------------------------------------------------------------------------------------------------------------------------------------------------------------------------------------------------------------------------------------------------------------------------------------------------------------------------------------------------------------------------------------------------------------------------------------------------------------------------------------------------------------------------------------------------------------------------------------------------------------------------------------------------------------------------------------------------------------------------|
| 165 | Cellular homeostasis                     | Cellular Function and Maintenance                              | 5.65E,08 | 45  | ARF6,ATP7B,ATXN3,B2M,BTK,CLCN5,CUL1,CYP2E1,DAPK2,EP300,F2,F3,FAS,FN1,GC,GRK2,HK2,HLA,DRB1,HMOX1,HSD17B10,IFNG,ITPK1,ITSN1,MMP1,MSH2,NDUFAB1,NOTCH1,PAFAH1B2,PAPSS1,PKD2,PKD4,PEX5,PIP4K2C,PPARG,PSAP,PTK2B,PYGL,RAC1,SKP1,THBS2,TRIM21,USP19,VPS26A,XIAP,YWHAQ                                                                                                                                                                                                                                                                                                                                                                                                                                                                                                                                                                                                                                                                                                                                                                                                                                                                                                                                                                                                    |
| 166 | Pelvic adenocarcinoma                    | Cancer,Organismal Injury and Abnormalities                     | 5.87E,08 | 178 | AASDHPPT,ACACB,ACADSB,ACADVL,ACBD7,ACY1,ALB,ALK,ANXA6,AOC3,APEX1,APPL1,AR,ARF6,ARHGAP5,ARHGAF1,ASAP1,ATP7B,B2M,B3GAT2,BCR,BTK,C8A,CA8,CANT1,CD1A,CLCN5,CLK1,CSDE1,CSF2RB,CSNK1G1,CSTF2,CTCF,CUL1,CYP17A1,CYP2E1,CYP7A1,DCTD,DMC1,DOK2,DPP4,DTYMK,EP300,EPHA3,EPSS8L2,ERBB4,ESR1,ETFF1,F2,F3,FAP,FCGR2A,FLNB,FN1,G6PD,GAD2,GALM,GALNT10,GART,GC,GRK2,GTF2I,HASPIN,HBB,HBEGF,HCK,HDAC7,HDX,HLA,DRB1,HMBOX1,HMGB3,HNRNPA2B1,HPD,HSD17B4,HSP90AB1,HTR1A,IFNG,IFNGR1,IGF1R,IQUB,ITGB3,ITPA,ITPKC,ITSN1,KIF11,KMT5A,LRBA,MAGEA4,MAGI2,MAP3K3,MAPK6,MARF1,MARK1,MATK,MDH1,MEMO1,MMP1,MMP2,MSN,MUC1,MYBPC1,MYBP3,MYSM1,NBEA,NCBP1,NCOA3,NF2,NFATC1,NMRK1,NMT1,NOTCH1,NR1I3,NT5C3A,NUP214,OAT,ODC1,OXSR1,PANK1,PAPSS1,PARN,PARP3,PATJ,PC,PKD3,PKD4,PGC,PGK1,PHF24,POU2F1,PPARG,PPP2R1A,PRKCB,PTK2B,PTPRE,PTPRF,PYGL,RARA,RARG,RBBP6,RBM39,RGS6,RND1,RRM1,RTN4IP1,RUVBL1,SARTR3,SENP2,SERPINA5,SF3B6,SFMBT2,SFN,SH3YL1,SKP1,SLC5A1,SLK,SMAP1,SMG5,SMTN,SMURF2,STK4,SUB1,SYT13,THBS2,TLR4,TRIM21,UEVLD,USP19,UTRN,VAV3,WHRN,WWP1,XIAP,YY1,ZEB2,ZFP28,ZIC3,ZNF292,ZNF462                                                                                                                                                                                                      |
| 167 | Extraadrenal retroperitoneal tumor       | Cancer,Organismal Injury and Abnormalities                     | 5.96E,08 | 116 | ACACB,ACAT2,ALB,ALK,ALOX12,APPL1,AR,ARHGAP5,ASAP1,ATP7B,ATXN3,B2M,BPI,BTRC,CANT1,CD74,CDK5R1,CHKA,CLK1,CRYM,CSDE1,CSF2RB,CSTF2,CTCF,CYP17A1,DCTD,DFFA,DOK2,DPP4,ECHS1,EP300,EPAH3,ERBB4,ESR1,F2,F3,FAP,FLNB,FN1,G6PD,GART,GC,GGPS1,GRHPR,GTF2I,HBB,HBEGF,HCK,HBCH,HLA,DRB1,HMGCS1,HMOX1,HPD,HSD17B4,HSP90AB1,IGF1R,IMPDH1,ITGB3,ITSN1,KIF11,KLK1,LRBA,MAGI2,MARK1,MMP2,MSH2,MUC1,MYBPC1,MYBPC3,NBEA,NCOA3,NF2,NFATC1,NOTCH1,NR1I3,NUP214,PA2G4,PANK1,PARP3,PC,PDHA1,PKD4,PGC,PGK1,POT1,POU2F1,PPARG,PPP2R1A,PRKCB,PTPRE,PYGL,RARA,RARG,RBBP6,RBM39,RBP5,RRM1,S100A6,SEC23A,SERPINA5,SFN,SMG7,SMTN,SULT1A1,TJP1,TLR4,UTRN,VAV3,VEGFB,WEE1,YY1,ZCWPW1,ZEB2,ZFP28,ZNF292,ZNF462                                                                                                                                                                                                                                                                                                                                                                                                                                                                                                                                                                                      |
| 168 | Synthesis of lipid                       | Lipid Metabolism,Small Molecule Biochemistry                   | 6.00E,08 | 32  | ACACB,ACAT2,ALB,ALOX12,ANG,CD74,CERT1,CHKA,CSNK1G2,CYP17A1,CYP2E1,CYP2R1,CYP7A1,DGKA,DPP4,ECHS1,F2,FAS,FCGR2A,FN1,G6PD,GGPS1,HMGCS1,HSD17B10,HSD17B4,IFNG,NCOA3,PCYT2,PK4,PIP4K2C,PPARG,RAC1                                                                                                                                                                                                                                                                                                                                                                                                                                                                                                                                                                                                                                                                                                                                                                                                                                                                                                                                                                                                                                                                      |
| 169 | Stage III cancer                         | Cancer,Organismal Injury and Abnormalities                     | 6.13E,08 | 17  | ALB,ALK,BTK,CSF2RB,ERBB4,ESR1,FN1,GART,GGPS1,HMOX1,HSP90AB1,IGF1R,MUC1,PARP3,RARA,RARG,RRM1                                                                                                                                                                                                                                                                                                                                                                                                                                                                                                                                                                                                                                                                                                                                                                                                                                                                                                                                                                                                                                                                                                                                                                       |
| 170 | Malignant soft tissue neoplasm           | Cancer,Organismal Injury and Abnormalities                     | 6.14E,08 | 211 | ACACB,ACADSB,ACSM2A,ADH7,ALB,ALK,ALOX12,AMY1C (includes others),ANG,AOC3,APEX1,APPL1,AR,ARHGAP5,ARHGAF1,ASAP1,ATP7B,ATXN3,B2M,BCR,BMP1,BPI,BTK,BTRC,C1R,C8A,CA8,CAMK4,CANT1,CD1A,CD74,CHKA,CLCN5,CRYM,CSDE1,CSF2RB,CSNK1G2,CSTF2,CTCF,CYP17A1,CYP2E1,CYP7A1,DAPK2,DCTD,DFFA,DGKA,DHPS,DMC1,DOK2,DPP4,DSG2,ECI2,EP300,EPHA3,EPSS8L2,ERBB4,ESR1,F2,F3,FABP3,FABP7,FAP,FAS,FCGR2A,FHIT,FLNB,FN1,GAD2,GALM,GALNT10,GART,GC,GGPS1,GRHPR,GRK2,GTF2I,HASPIN,HAT1,HBB,HBEGF,HCK,HDAC7,HDX,HK2,HLA,DRB1,HMGCS1,HNRNPA2B1,HPD,HSCB,HSD17B10,HSD17B4,HSP90AB1,HTR1A,IFNG,IFNGR1,IGF1R,IMPDH1,IQUB,ITGB3,ITPK1,ITPKC,ITSN1,KMT5A,KYNU,LRBA,MAGEA4,MAGI2,MAPK6,MARF1,MARK1,MATK,MDH1,MECR,MEMO1,MMP1,MMP2,MSH2,MSN,MUC1,MYBPC1,MYBPC3,NAE1,NBEA,NCBP1,NCOA3,NF2,NFATC1,NOTCH1,NR1I3,NSUN5,NUP214,OAT,ODC1,OXSR1,PA2G4,PAFAH1B2,PAH,PANK1,PAPSS1,PARN,PARP3,PATJ,PC,PCYT2,PKD2,PKD3,PKD4,PEX5,PGC,PGK1,PHF24,POT1,POU2F1,PPARG,PPP2R1A,PRKCB,PSAP,PTK2B,PTPRE,PTPRF,PYGL,RAC1,RARA,RARG,RBBP6,RBP5,RGS6,RND1,RPA3,RRM1,RTN4IP1,RUVBL1,SART3,SEC23A,SEM1,SEMA4D,SENP2,SERPINA5,SFMBT2,SH2B2,SH3YL1,SKP1,SLC5A1,SLK,SMAP1,SMG5,SMG7,SMTN,SMURF2,STARD13,STK4,SULT1A1,SYT13,THBS2,TIMM9,TJP1,TLR4,TRIM21,USP19,UTRN,VAV3,WHRN,WWP1,XIAP,XRCC6,ZCWPW1,ZEB2,ZFP28,ZIC3,ZNF292,ZNF462 |
| 171 | Malignant neoplasm of respiratory system | Cancer,Organismal Injury and Abnormalities,Respiratory Disease | 6.23E,08 | 140 | ACAT2,ADH1C,ADH7,ALB,ALK,ALOX12,ANXA6,APEX1,AR,ARHGAP5,ARHGAF1,B2M,B3GAT2,BMP1,BTK,BTRC,C8A,CA8,CAMK4,CD1A,CERT1,CLCN5,CLK1,CSF2RB,CSNK1G2,CTCF,CUL1,CYP17A1,CYP2E1,CYP2R1,DGKA,DOK2,DPP4,DSG2,EP300,EPAH3,ERBB4,ESR1,F2,F3,FAP,FAS,FHIT,FN1,GAD2,GALNT10,GART,GGPS1,GRHPR,GRK6,GTF2I,HASPIN,HCK,HDX,HK2,HMGB3,HNRNPA2B1,HPD,HSD17B4,HSP90AB1,HTR1A,IDE,IFNG,IFNGR1,IGF1R,IQUB,ITPKC,KIF11,KMT5A,KYNU,LRBA,MAGEA4,MAGI2,MAPK6,MATK,                                                                                                                                                                                                                                                                                                                                                                                                                                                                                                                                                                                                                                                                                                                                                                                                                               |

|     |                                   |                                                                                                                      |          |     |                                                                                                                                                                                                                                                                                                                                                                                                                                                                                                                                                                                                                                                                                                                                                                                                                                                                                                                                                                                                                                                                                                                                                                                                                                                                                                                                                                                                                                                                                                      |
|-----|-----------------------------------|----------------------------------------------------------------------------------------------------------------------|----------|-----|------------------------------------------------------------------------------------------------------------------------------------------------------------------------------------------------------------------------------------------------------------------------------------------------------------------------------------------------------------------------------------------------------------------------------------------------------------------------------------------------------------------------------------------------------------------------------------------------------------------------------------------------------------------------------------------------------------------------------------------------------------------------------------------------------------------------------------------------------------------------------------------------------------------------------------------------------------------------------------------------------------------------------------------------------------------------------------------------------------------------------------------------------------------------------------------------------------------------------------------------------------------------------------------------------------------------------------------------------------------------------------------------------------------------------------------------------------------------------------------------------|
|     |                                   |                                                                                                                      |          |     | MDH1,MMP1,MMP2,MSH2,MSN,MTAP,MUC1,MYBPC1,NBEA,NCOA3,NDC80,NF2,NMT1,NOTCH1,NT5C3A,OAT,ODC1,OXSR1,PAH,PANK1,PARP3,PATJ,PDHA1,PK2,PK4,PEX5,PGC,PGK1,PIP4K2C,POT1,PPARG,PPP2R1A,PRKCB,PSAP,PTK2B,PTPRE,PTPRF,PYGL,RAC1,RARA,RARG,RBBP6,RGS6,RRM1,SEMA4D,SEN2,SERPINA5,SFN,SKP1,SLK,SMG7,SMURF2,STK4,SULT1A1,THBS2,TJP1,TLR4,TTR,TXNDC12,UTRN,VAV3,WWP1,ZCWPW1,ZNF292,ZNF462                                                                                                                                                                                                                                                                                                                                                                                                                                                                                                                                                                                                                                                                                                                                                                                                                                                                                                                                                                                                                                                                                                                              |
| 172 | Primary immunodeficiency disorder | Immunological Disease                                                                                                | 6.30E,08 | 15  | ARHGEF1,BTK,CA8,CD74,FAS,FCGR2A,G6PD,GRHR,IFNGR1,LRBA,MSN,PPARG,TAF13,TLR4,XIAP                                                                                                                                                                                                                                                                                                                                                                                                                                                                                                                                                                                                                                                                                                                                                                                                                                                                                                                                                                                                                                                                                                                                                                                                                                                                                                                                                                                                                      |
| 173 | Serous ovarian adenocarcinoma     | Cancer,Endocrine System Disorders,Organismal Injury and Abnormalities,Reproductive System Disease                    | 6.37E,08 | 19  | ALK,AR,B2M,BCR,CTCF,DPP4,EP300,EPA3,HSP90AB1,MUC1,NOTCH1,PARP3,PK4,PPP2R1A,RRM1,SKP1,THBS2,TLR4,VAV3                                                                                                                                                                                                                                                                                                                                                                                                                                                                                                                                                                                                                                                                                                                                                                                                                                                                                                                                                                                                                                                                                                                                                                                                                                                                                                                                                                                                 |
| 174 | Breast carcinoma                  | Cancer,Organismal Injury and Abnormalities,Reproductive System Disease                                               | 6.47E,08 | 83  | ACACB,ALK,AR,ARHGEF1,BCR,BTK,CAMK4,CLK1,CSDE1,CSNK1G1,CTCF,DAPK2,DPP4,EP300,EPA3,ERBB4,ESR1,EXOSC9,FAP,FLNB,FN1,GALNT10,GGPS1,GRK2,GRK6,HAT1,HDAC7,HLA,DRB1,HMGCS1,HSP90AB1,IGF1R,ITGB3,ITPKC,KIF11,KMT5A,MAGEA4,MAPK6,MARF1,MARK1,MMP2,MSH2,MSN,MUC1,MYBPC3,NBEA,NCOA3,NDC80,NF2,NFATC1,NOTCH1,OXSR1,PAFAH1B2,PARP3,PC,PK3,PK4,PHF24,POU2F1,PPARG,PPP2R1A,PRKCB,PTPRE,PTPRF,RAC1,RARA,RBBP6,RBM39,RRM1,SEN2,SERPINA5,SLC5A1,SLK,SMG7,SMTN,SMURF2,SYT13,TLR4,USP19,VAV3,WEE1,YWHAQ,ZEB2,ZNF462                                                                                                                                                                                                                                                                                                                                                                                                                                                                                                                                                                                                                                                                                                                                                                                                                                                                                                                                                                                                       |
| 175 | Abdominal adenocarcinoma          | Cancer,Organismal Injury and Abnormalities                                                                           | 6.59E,08 | 253 | AASDHPPT,ACACB,ACADSB,ACADVL,ACAT2,ACBD7,ACSM2A,ACVR2B,ACY1,ADH1C,ADH7,ALB,ALK,ALOX12,ANXA6,AOC3,APEX1,APPL1,AR,ARF6,ARHGAP5,ARHGEF1,ASAP1,ATP7B,ATXN3,B2M,B3GAT2,BCR,BMP1,BPI,BTK,BTRC,C1R,C8A,CA8,CAMK4,CANT1,CD1A,CD74,CDK5R1,CHKA,CLCN5,CLK1,CRYM,CSDE1,CSF2RB,CSNK1G1,CSNK1G2,CSTF2,CTCF,CUL1,CYP17A1,CYP2E1,CYP7A1,DAPK2,DCTD,DCXR,DFFA,DGKA,DHPS,DMC1,DOK2,DPP4,DSG2,DTYMK,ECHS1,EP300,EPA3,EP8L2,ERBB4,ESR1,ETF1,EXOSC9,F2,F3,FAP,FAS,FCGR2A,FHIT,FLNB,FN1,G6PD,GAD2,GALM,GALNT10,GART,GC,GGPS1,GRHR,GRK2,GRK6,GTF2I,HADH,HASPIN,HBB,HBEGF,HCK,HDAC7,HDX,HIBCH,HK2,HLA,DRB1,HMBOX1,HMGB3,HMGCS1,HMOX1,HNRNPA2B1,HPD,HSCB,HSD17B10,HSD17B4,HSP90AB1,HTR1A,IDE,IFNG,IFNGR1,IGF1R,IMPA2,IMP1,IQUB,ITGB3,ITPA,ITPK1,ITPKC,ITSN1,KIF11,KLK1,KMT5A,KYNU,LRBA,MAGEA4,MAGI2,MAP3K3,MAPK6,MARF1,MARK1,MATK,MDH1,MECR,MEMO1,MMP1,MMP2,MSH2,MSN,MTAP,MUC1,MYBPC1,MYBPC3,MYSM1,NAE1,NBEA,NCBP1,NCOA3,NF2,NFATC1,NMRK1,NMT1,NOTCH1,NR1H3,NSUN5,N25C3A,NUP214,OAT,ODC1,OXSR1,PA2G4,PAFAH1B2,PANK1,PAPSS1,PARN,PARP3,PATJ,PC,PCYT2,PDHA1,PK2,PK3,PK4,PGC,PGK1,PHF24,POT1,POU2F1,PPARG,PPP2R1A,PRKCB,PTK2B,PTPRE,PTPRF,PUS10,PYGL,RAB26,RAC1,RARA,RARG,RBBP6,RBM39,RBP5,RGS6,RND1,RRM1,RTN4IP1,RUVBL1,SART3,SEC23A,SEMA4D,SEN2,SERPINA5,SF3B6,SFMBT2,SFN,SH2B2,SH3YL1,SKP1,SLC5A1,SLK,SMAP1,SMG5,SMG7,SMTN,SMURF2,SNX1,SPEF1,STARD13,STK16,STK4,SUB1,SULT1A1,SYT13,THBS2,TJP1,TLR4,TRIM21,UEVLD,USP19,UTRN,VAV3,VEGFB,VPS26A,WEE1,WHRN,WWP1,XIAP,XRCC6,YWHAH,YY1,ZBTB43,ZCWPW1,ZEB2,ZFP28,ZIC3,ZNF292,ZNF462 |
| 176 | Diabetes mellitus                 | Endocrine System Disorders,Gastrointestinal Disease,Metabolic Disease,Organismal Injury and Abnormalities            | 6.98E,08 | 41  | ALB,APPL1,AR,B2M,BPI,CYP2E1,CYP2R1,DPP4,ECHS1,ESR1,F3,FAS,FCGR2A,FN1,GC,GGPS1,HADH,HBB,HK2,HMBOX1,HTR1A,IDE,IFNG,IGF1R,IMP1,ITGB3,KIF11,MAGI2,NOTCH1,PK4,PPARG,PRKCB,RAC1,SLC5A1,SMURF2,TAF13,THBS2,TLR4,UTRN,VEGFB,ZEB2                                                                                                                                                                                                                                                                                                                                                                                                                                                                                                                                                                                                                                                                                                                                                                                                                                                                                                                                                                                                                                                                                                                                                                                                                                                                             |
| 177 | Rheumatic Disease                 | Connective Tissue Disorders,Inflammatory Disease,Organismal Injury and Abnormalities,Skeletal and Muscular Disorders | 7.23E,08 | 54  | ALB,ALOX12,ANG,AR,ASAP1,B2M,BPI,C1R,CD1A,CD74,CDK5R1,CSF2RB,CYP2E1,DPP4,ESR1,FAS,FCGR2A,FN1,GGPS1,HBB,HCK,HDAC7,HLA,DRB1,HMOX1,IDE,IFNG,IGF1R,IMP1,ITPA,MAP3K3,MMP1,MMP2,MTAP,NF2,NFATC1,PGK1,PPARG,PRKCB,PTK2B,PTPRE,RAC1,RGS6,RRM1,S100A6,SF3B6,SMG7,TAF13,TIMM9,TJP1,TLR4,TRIM21,WARS1,XIAP,XRCC6                                                                                                                                                                                                                                                                                                                                                                                                                                                                                                                                                                                                                                                                                                                                                                                                                                                                                                                                                                                                                                                                                                                                                                                                 |

|     |                                          |                                                                                                                                             |          |     |                                                                                                                                                                                                                                                                                                                                                                                                                                                                                                                                                                                                                                                                                                                                                                                                                                                                                                                                                                                                                                                                                                                                                                                                                                                                                  |
|-----|------------------------------------------|---------------------------------------------------------------------------------------------------------------------------------------------|----------|-----|----------------------------------------------------------------------------------------------------------------------------------------------------------------------------------------------------------------------------------------------------------------------------------------------------------------------------------------------------------------------------------------------------------------------------------------------------------------------------------------------------------------------------------------------------------------------------------------------------------------------------------------------------------------------------------------------------------------------------------------------------------------------------------------------------------------------------------------------------------------------------------------------------------------------------------------------------------------------------------------------------------------------------------------------------------------------------------------------------------------------------------------------------------------------------------------------------------------------------------------------------------------------------------|
| 178 | Bladder cancer                           | Cancer,Organismal Injury and Abnormalities,Renal and Urological Disease                                                                     | 7.39E,08 | 59  | ACACB,ALB,ALK,AOC3,AR,ARHGAP5,BCR,BMP1,BTK,CSF2RB,CSTF2,CTCF,CUL1,DGKA,DHPS,DOK2,EP300,EPHA3,EP8L2,ERBB4,FAP,FN1,GART,GRHPR,HNRNPA2B1,HSP90AB1,KMT5A,KYNU,MAGEA4,MAGI2,MARF1,MMP2,MTAP,NCOA3,NF2,NOTCH1,NT5C3A,ODC1,PA2G4,PAH,PDK4,PPARG,PPP2R1A,PRKCB,PSAP,PTK2B,PTPRF,RARA,RARG,RBBP6,RBM39,RRM1,SLC5A1,THBS2,TLR4,UTRN,XIAP,ZCWPW1,ZEB2                                                                                                                                                                                                                                                                                                                                                                                                                                                                                                                                                                                                                                                                                                                                                                                                                                                                                                                                       |
| 179 | Metastatic non-small cell lung carcinoma | Cancer,Organismal Injury and Abnormalities,Respiratory Disease                                                                              | 7.73E,08 | 14  | ALB,ALK,B2M,ERBB4,FAS,FN1,GART,GGPS1,HSP90AB1,IGF1R,PARP3,PGC,PTK2B,RRM1                                                                                                                                                                                                                                                                                                                                                                                                                                                                                                                                                                                                                                                                                                                                                                                                                                                                                                                                                                                                                                                                                                                                                                                                         |
| 180 | Connective or soft tissue tumor          | Cancer,Organismal Injury and Abnormalities                                                                                                  | 7.94E,08 | 214 | ACACB,ACADSB,ACSM2A,ADH7,ALB,ALK,ALOX12,AMY1C (includes others),ANG,AOC3,APEX1,APPL1,AR,ARHGAP5,ARHGEF1,ASAP1,ATP7B,ATXN3,B2M,BCR,BMP1,BPI,BTK,BTRC,C1R,C8A,CA8,CAMK4,CANT1,CD1A,CD74,CHKA,CLCN5,CRYM,CSDE1,CSF2RB,CSNK1G2,CSTF2,CTCF,CYP17A1,CYP2E1,CYP7A1,DAPK2,DCTD,DFFA,DGKA,DHPS,DMC1,DOK2,DPP4,DSG2,ECI2,EP300,EPHA3,EP8L2,ERBB4,ESR1,F2,F3,FABP3,FABP7,FAP,FAS,FCGR2A,FHIT,FLNB,FN1,GAD2,GALM,GALNT10,GART,GC,GGPS1,GRHPR,GRK2,GTF2I,HASPIN,HAT1,HBB,HBEGF,HCK,HDAC7,HDX,HK2,HLA,DRB1,HMGCS1,HNRNPA2B1,HPD,HSCB,HSD17B10,HSD17B4,HSP90AB1,HTR1A,IFNG,IFNGR1,IGF1R,IMPDH1,IQUB,ITGB3,ITPK1,ITPKC,ITSN1,KMT5A,KYNU,LRBA,MAGEA4,MAGI2,MAPK6,MARF1,MARK1,MATK,MDH1,MECR,MEMO1,MMP1,MMP2,MSH2,MSN,MUC1,MYBPC1,MYBPC3,NAE1,NBEA,NCBP1,NCOA3,NF2,NFATC1,NOTCH1,NR1I3,NSUN5,NUP214,OAT,ODC1,OXSR1,PA2G4,PAFAH1B2,PAH,PANK1,PAPSS1,PARN,PARP3,PATJ,PC,PCYT2,PDK2,PDK3,PDK4,PEX5,PGC,PGK1,PHF24,POT1,POU2F1,PPARG,PPP2R1A,PRKCB,PSAP,PTK2B,PTPRE,PTPRF,PYGL,RAC1,RARA,RARG,RBBP6,RBP5,RGS6,RND1,RPA3,RRM1,RTN4IP1,RUVBL1,S100A6,SART3,SEC23A,SEM1,SEMA4D,SENP2,SERPINA5,SFMBT2,SH2B2,SH3YL1,SKP1,SLC5A1,SLK,SMAP1,SMG5,SMG7,SMTN,SMURF2,STARD13,STK4,SULT1A1,SYT13,TAI1,THBS2,TIMM9,TJP1,TLR4,TRIM21,USP19,UTRN,VAV3,WEE1,WHRN,WWP1,XIAP,XRCC6,ZCWPW1,ZEB2,ZFP28,ZIC3,ZNF292,ZNF462 |
| 181 | Neuroblastoma                            | Cancer,Neurological Disease,Organismal Injury and Abnormalities                                                                             | 8.33E,08 | 14  | ALK,AR,CSF2RB,CTCF,EP300,FAP,FCGR2A,HSP90AB1,IDE,IGF1R,PGK1,RARA,RARG,UTRN                                                                                                                                                                                                                                                                                                                                                                                                                                                                                                                                                                                                                                                                                                                                                                                                                                                                                                                                                                                                                                                                                                                                                                                                       |
| 182 | Advanced adenocarcinoma                  | Cancer,Organismal Injury and Abnormalities                                                                                                  | 8.61E,08 | 19  | ALB,ALK,AR,BCR,DPP4,ERBB4,ESR1,F3,FAS,GART,HSP90AB1,IGF1R,MUC1,NR1I3,PARP3,PTK2B,RRM1,SKP1,VAV3                                                                                                                                                                                                                                                                                                                                                                                                                                                                                                                                                                                                                                                                                                                                                                                                                                                                                                                                                                                                                                                                                                                                                                                  |
| 183 | Pelvic carcinoma                         | Cancer,Organismal Injury and Abnormalities                                                                                                  | 8.65E,08 | 195 | AASDHPPT,ACACB,ACADSB,ACADVL,ACBD7,ACY1,ADH7,ALB,ALK,ANXA6,AOC3,APEX1,APPL1,AR,ARHGAP5,ARHGEF1,ASAP1,ATP7B,B2M,B3GAT2,BCR,BMP1,BTK,BTRC,C8A,CA8,CANT1,CD1A,CLCN5,CLK1,CSDE1,CSF2RB,CSNK1G1,CSTF2,CTCF,CUL1,CYP17A1,CYP2E1,CYP7A1,DCTD,DGKA,DHPS,DMC1,DOK2,DPP4,DTYMK,EP300,EPHA3,EP8L2,ERBB4,ESR1,ETF1,F2,F3,FABP7,FAP,FAS,FCGR2A,FLNB,FN1,G6PD,GAD2,GALM,GALNT10,GART,GC,GRHPR,GRK2,GTF2I,HASPIN,HBB,HBEGF,HCK,HDAC7,HDX,HLA,DRB1,HMBOX1,HMGB3,HNRNPA2B1,HPD,HSD17B4,HSP90AB1,HTR1A,IFNG,IFNGR1,IGF1R,IQUB,ITGB3,ITPA,ITPKC,ITSN1,KIF11,KMT5A,KYNU,LRBA,MAGEA4,MAGI2,MAP3K3,MAPK6,MARF1,MARK1,MATK,MDH1,MEMO1,MMP1,MMP2,MSH2,MSN,MTAP,MUC1,MYBPC1,MYBPC3,MYSM1,NAE1,NBEA,NCBP1,NCOA3,NF2,NFATC1,NMRK1,NMT1,NOTCH1,NR1I3,NT5C3A,NUP214,OAT,ODC1,OXSR1,PA2G4,PAH,PANK1,PAPSS1,PARN,PARP3,PATJ,PC,PDK3,PDK4,PGC,PGK1,PHF24,POU2R1A,PRKCB,PSAP,PTK2B,PTPRE,PTPRF,PYGL,RARA,RARG,RBBP6,RBM39,RGS6,RND1,RRM1,RTN4IP1,RUVBL1,SART3,SENP2,SERPINA5,SF3B6,SFMBT2,SFN,SH3YL1,SKP1,SLC5A1,SLK,SMAP1,SMG5,SMTN,SMURF2,STK4,SUB1,SYT13,THBS2,TJP1,TLR4,TRIM21,UEVLD,USP19,UTRN,VAV3,WHRN,WWP1,XIAP,YY1,ZCWPW1,ZEB2,ZFP28,ZIC3,ZNF292,ZNF462                                                                                                                                                  |
| 184 | Atopic dermatitis                        | Dermatological Diseases and Conditions,Immunological Disease,Inflammatory Disease,Inflammatory Response,Organismal Injury and Abnormalities | 9.04E,08 | 19  | ACADVL,CD1A,CD74,CSF2RB,GRK2,HBB,HCK,HLA,DRB1,HTR1A,IDE,KLK1,MSN,PDK4,PPARG,PRKCB,PSAP,RUVBL1,TLR4,XRCC6                                                                                                                                                                                                                                                                                                                                                                                                                                                                                                                                                                                                                                                                                                                                                                                                                                                                                                                                                                                                                                                                                                                                                                         |

|     |                                 |                                                                                          |          |     |                                                                                                                                                                                                                                                                                                                                                                                                                                                                                                                                                                                                                                                                                                                                                                                                                                                                                                                                                                                                                                                                                                                                                                                                                                                                                                                     |
|-----|---------------------------------|------------------------------------------------------------------------------------------|----------|-----|---------------------------------------------------------------------------------------------------------------------------------------------------------------------------------------------------------------------------------------------------------------------------------------------------------------------------------------------------------------------------------------------------------------------------------------------------------------------------------------------------------------------------------------------------------------------------------------------------------------------------------------------------------------------------------------------------------------------------------------------------------------------------------------------------------------------------------------------------------------------------------------------------------------------------------------------------------------------------------------------------------------------------------------------------------------------------------------------------------------------------------------------------------------------------------------------------------------------------------------------------------------------------------------------------------------------|
| 185 | Binding of leukocytes           | Cell,To,Cell Signaling and Interaction,Hematologic al System Development and Function    | 9.17E,08 | 17  | AOC3,ARHGEF1,BPI,F2,F3,FAS,FCGR2A,FN1,IFNG,ITGB3,MSN,PPARG,PTK2B,RAC1,SEMA4D,TLR4,UTRN                                                                                                                                                                                                                                                                                                                                                                                                                                                                                                                                                                                                                                                                                                                                                                                                                                                                                                                                                                                                                                                                                                                                                                                                                              |
| 186 | Cell death of kidney cell lines | Cell Death and Survival,Organismal Injury and Abnormalities,Renal and Urological Disease | 9.36E,08 | 20  | AR,ATXN3,F2,F3,FAS,GRK2,HK2,IFNG,IGF1R,NDUFAB1,NF2,PEX5,PPARG,PRKCB,RAC1,STK4,TNFAIP8L2, XIAP,YWHAQ,YY1                                                                                                                                                                                                                                                                                                                                                                                                                                                                                                                                                                                                                                                                                                                                                                                                                                                                                                                                                                                                                                                                                                                                                                                                             |
| 187 | Refractory solid tumor          | Cancer,Organismal Injury and Abnormalities                                               | 9.48E,08 | 15  | ALB,ALK,AR,BTK,ERBB4,GART,GGPS1,HDAC7,HMOX1,HSP90AB1,IMPDH1,PARP3,PTK2B,RRM1,VEGFB                                                                                                                                                                                                                                                                                                                                                                                                                                                                                                                                                                                                                                                                                                                                                                                                                                                                                                                                                                                                                                                                                                                                                                                                                                  |
| 188 | Primary neoplasm                | Cancer,Organismal Injury and Abnormalities                                               | 9.54E,08 | 29  | ALB,ALK,B2M,BTK,CDK5R1,CSF2RB,CSNK1G2,CTCF,DOK2,EP300,ERBB4,ESR1,FN1,GART,HDAC7,HSP90 AB1,IGF1R,MUC1,NF2,ODC1,PARP3,PPARG,PPP2R1A,RAC1,RARA,RARG,RRM1,SEMA4D,VEGFB                                                                                                                                                                                                                                                                                                                                                                                                                                                                                                                                                                                                                                                                                                                                                                                                                                                                                                                                                                                                                                                                                                                                                  |
| 189 | Expression of RNA               | Gene Expression                                                                          | 9.55E,08 | 63  | ACVR2B,ANG,APEX1,AR,ATXN3,BTK,BTRC,CAMK4,CD74,CDK5R1,CIAO1,CRYM,CTCF,DHPS,EP300,ERB B4,ESR1,ETF1,F2,F3,FAS,FN1,GTF2F2,GTF2I,HBB,HDAC7,HLA,DRB1,HMBOX1,HNRNPA2B1,IFNG,KMT5A, MAP3K3,MSH2,MSN,MYSM1,NCBP1,NCOA3,NFATC1,NOTCH1,NR1I3,PA2G4,PC,POU2F1,PPARG,PRKCB, RAC1,RARA,RARG,RBBP6,SART3,SEMA4D,SFMBT2,SMURF2,SUB1,TAF13,TLR4,WARS1,XRCC6,YWHAH, YWHAQ,YY1,ZEB2,ZIC3                                                                                                                                                                                                                                                                                                                                                                                                                                                                                                                                                                                                                                                                                                                                                                                                                                                                                                                                               |
| 190 | Skin lesion                     | Dermatological Diseases and Conditions,Organismal Injury and Abnormalities               | 9.87E,08 | 209 | ACACB,ACADSB,ACSM2A,ADH7,ALB,ALK,ALOX12,AMY1C (includes others),ANG,AOC3,APEX1,APPL1,AR,ARHGAP5,ARHGEF1,ASAP1,ATP7B,ATXN3,B2M,BCR,BMP1,BPI,BTK, BTRC,C1R,C8A,CA8,CAMK4,CANT1,CD1A,CD74,CHKA,CLCN5,CRYM,CSDE1,CSF2RB,CSNK1G2,CSTF2,C TCF,CYP17A1,CYP2E1,CYP7A1,DAPK2,DCTD,DFFA,DGKA,DHPS,DMC1,DOK2,PPP4,DSG2,ECI2,EP300,EP HA3,EP38L2,ERBB4,ESR1,F2,F3,FABP3,FAP,FAS,FCGR2A,FHIT,FLNB,FN1,G6PD,GAD2,GALM,GALNT10,G ART,GC,GGPS1,GRHPR,GRK2,GRK6,GTF2I,HASPIN,HAT1,HBB,HBEGF,HCK,HDAC7,HDX,HK2,HLA,DRB1, HMGC51,HNRNPA2B1,HPD,HSCB,HSD17B10,HSP90AB1,HTR1A,IFNG,IFNGR1,IGF1R,IMPDH1,IQUB,ITGB 3,ITPK1,ITPKC,ITSN1,KYNU,LRBA,MAGEA4,MAGI2,MARF1,MARK1,MATK,MDH1,MECR,MEMO1,MMP1, MMP2,MSH2,MSN,MUC1,MYBPC1,MYBPC3,NBEA,NCBP1,NCOA3,NF2,NFATC1,NOTCH1,NR1I3,NSUN5,N UP214,OAT,ODC1,OXSR1,PA2G4,PAFAH1B2,PAH,PANK1,PAPSS1,PARN,PARP3,PATJ,PC,PCYT2,PDK2,PD K3,PDK4,PEX5,PGC,PGK1,PHF24,POT1,POU2F1,PPARG,PPP2R1A,PRKCB,PSAP,PTK2B,PTPRE,PTPRF,PYG L,RAC1,RARA,RARG,RBBP6,RBP5,RGS6,RND1,RPA3,RRM1,RTN4IP1,RUVBL1,SART3,SEC23A,SEM1,SEM A4D,SENP2,SERPINA5,SFMBT2,SH2B2,SH3YL1,SKP1,SLC5A1,SLK,SMAP1,SMG5,SMG7,SMTN,SMURF2,ST ARD13,STK4,SULT1A1,SYT13,THBS2,TIMM9,TJP1,TLR4,TRIM21,UEVLD,USP19,UTRN,VAV3,WHRN,WWP 1,XIAP,XRCC6,ZBTB43,ZCWPW1,ZEB2,ZFP28,ZNF292,ZNF462                                                    |
| 191 | Abdominal neoplasm              | Cancer,Organismal Injury and Abnormalities                                               | 1.00E,07 | 269 | AASDHPPT,ACACB,ACADSB,ACADVL,ACAT2,ACBD7,ACP3,ACSM2A,ACVR2B,ACY1,ADH1C,ADH7,ALB, ALK,ALOX12,ANG,ANXA6,AOC3,APEX1,APPL1,AR,ARF6,ARHGAP5,ARHGEF1,ASAP1,ATP7B,ATXN3,B2 M,B3GAT2,BCR,BMP1,BPI,BTK,BTRC,C1R,C8A,CA8,CAMK4,CANT1,CD1A,CD74,CDK5R1,CHKA,CLCN5,C LK1,CRYM,CSDE1,CSF2RB,CSNK1G1,CSNK1G2,CSTF2,CTCF,CUL1,CYP17A1,CYP2E1,CYP7A1,DAPK2,DC TD,DCXR,DFFA,DGKA,DHPS,DMC1,DOK2,DPP4,DSG2,DTYMK,ECHS1,ECI2,EP300,EPA3,EP38L2,ERBB4, ERI1,ESR1,ETF1,EXOSC9,F2,F3,FABP3,FABP7,FAP,FAS,FCGR2A,FHIT,FLNB,FN1,G6PD,GAD2,GALM,GAL NT10,GART,GC,GGPS1,GRHPR,GRK2,GRK6,GTF2F2,GTF2I,HADH,HASPIN,HBB,HBEGF,HCK,HDAC7,HDX, HIBCH,HK2,HLA,DRB1,HMBOX1,HMGB3,HMGC51,HMOX1,HNRNPA2B1,HPD,HSCB,HSD17B10,HSD17B4, HSP90AB1,HTR1A,IDE,IFNG,IFNGR1,IGF1R,IMPA2,IMPDH1,IQUB,ITGB3,ITPA,ITPK1,ITPKC,ITSN1,KIF11, KLK1,KMT5A,KYNU,LRBA,MAGEA4,MAGI2,MAP3K3,MAPK6,MARF1,MARK1,MATK,MDH1,MECR,MEM O1,MMP1,MMP2,MSH2,MSN,MTAP,MUC1,MYBPC1,MYBPC3,MYSM1,NAE1,NBEA,NCBP1,NCOA3,NF2,NF ATC1,NMRK1,NMT1,NOTCH1,NR1I3,NSUN5,NT5C3A,NUP214,OAT,ODC1,OXSR1,PA2G4,PAFAH1B2,PAH, PANK1,PAPSS1,PARN,PARP3,PATJ,PC,PCYT2,PDHA1,PDK2,PDK3,PDK4,PEX5,PGC,PGK1,PHF24,POT1,PO U2F1,PPARG,PPP2R1A,PRKCB,PSAP,PTK2B,PTPRE,PTPRF,PUS10,PYGL,RAB26,RAC1,RARA,RARG,RBBP6, RBM39,RBP5,RGS6,RND1,RRM1,RTN4IP1,RUVBL1,S100A6,SART3,SEC23A,SEMA4D,SENP2,SERPINA5,SE |

|     |                                    |                                                                                                 |          |     |                                                                                                                                                                                                                                                                                                                                                                                                                                                                                                                                                                                                                                                                                                                                                                                                                                                                                                                                                                                                                                                                                                                                                                                                                                |
|-----|------------------------------------|-------------------------------------------------------------------------------------------------|----------|-----|--------------------------------------------------------------------------------------------------------------------------------------------------------------------------------------------------------------------------------------------------------------------------------------------------------------------------------------------------------------------------------------------------------------------------------------------------------------------------------------------------------------------------------------------------------------------------------------------------------------------------------------------------------------------------------------------------------------------------------------------------------------------------------------------------------------------------------------------------------------------------------------------------------------------------------------------------------------------------------------------------------------------------------------------------------------------------------------------------------------------------------------------------------------------------------------------------------------------------------|
|     |                                    |                                                                                                 |          |     | 3B6,SFMBT2,SFN,SH2B2,SH3YL1,SKP1,SLC5A1,SLK,SMAP1,SMG5,SMG7,SMTN,SMURF2,SNX1,SNX22,SP<br>EF1,STARD13,STK16,STK4,SUB1,SULT1A1,SYT13,TAF13,THBS2,TJPI,TLR4,TNFAIP8L2,TRIM21,TTR,UEV<br>LD,USP19,UTRN,VAV3,VEGFB,VPS26A,WEE1,WHRN,WWP1,XIAP,XRCC6,YWHAH,YWHAQ,YY1,ZBTB43,<br>ZCWPW1,ZEB2,ZFP28,ZIC3,ZNF292,ZNF462                                                                                                                                                                                                                                                                                                                                                                                                                                                                                                                                                                                                                                                                                                                                                                                                                                                                                                                 |
| 192 | Hypersensitive reaction            | Immunological Disease                                                                           | 1.01E,07 | 21  | ACADVL,CD1A,CD74,CSF2RB,FCGR2A,GRK2,HBB,HCK,HLA,DRB1,HTR1A,IDE,IFNG,KLK1,MSN,PDK4,PP<br>ARG,PRKCB,PSAP,RUVBL1,TLR4,XRCC6                                                                                                                                                                                                                                                                                                                                                                                                                                                                                                                                                                                                                                                                                                                                                                                                                                                                                                                                                                                                                                                                                                       |
| 193 | Uterine tumor                      | Cancer,Organismal<br>Injury and<br>Abnormalities,Reproduc<br>tive System Disease                | 1.01E,07 | 148 | AASDHPPT,ACACB,ACADSB,ACBD7,ACY1,ALB,ALK,AOC3,APPL1,AR,ARHGAP5,ATP7B,B2M,B3GAT2,B<br>CR,BTK,BTRC,C8A,CA8,CD1A,CLCN5,CSDE1,CSF2RB,CSTF2,CTCF,CUL1,CYP7A1,DCTD,DHPS,DMC1,DO<br>K2,DPP4,DTYMK,EP300,EPAH3,ERBB4,ESR1,ETF1,F3,FABP7,FAP,FAS,FCGR2A,FLNB,FN1,G6PD,GAD2,GA<br>RT,GRHPR,GRK2,GTF2I,HBB,HDAC7,HDX,HMBOX1,HMGB3,HMOX1,HPD,HSD17B10,HSD17B4,HSP90AB1<br>,HTR1A,IFNG,IGF1R,IQUB,ITGB3,ITPKC,KIF11,LRBA,MAGEA4,MAGI2,MAP3K3,MAPK6,MARF1,MARK1,<br>MDH1,MEMO1,MMP1,MMP2,MSH2,MSN,MUC1,MYBPC3,MYSM1,NAE1,NBEA,NCBP1,NF2,NFATC1,NMR<br>K1,NMT1,NOTCH1,NT5C3A,NUP214,OAT,PANK1,PARN,PARP3,PATJ,PDK3,PDK4,PGK1,PPARG,PPP2R1A,P<br>TPRE,PTPRF,RAC1,RARA,RARG,RBBP6,RBM39,RGS6,RND1,RRM1,RUVBL1,S100A6,SART3,SEN2,SEPI<br>NA5,SF3B6,SH3YL1,SLC5A1,SLK,SMG5,SMTN,SMURF2,SNX1,STK4,SUB1,SULT1A1,SYT13,TAF13,THBS2,<br>TJPI,TLR4,TRIM21,UEVLD,UTRN,VAV3,WEE1,WWP1,XIAP,YY1,ZEB2,ZFP28,ZIC3,ZNF292,ZNF462                                                                                                                                                                                                                                                                                                                             |
| 194 | Waldenstr 枚 m<br>macroglobulinemia | Cancer,Hematological<br>Disease,Immunological<br>Disease,Organismal<br>Injury and Abnormalities | 1.03E,07 | 20  | ANXA6,BTK,CLK1,CSF2RB,ECI2,EP300,FN1,GTF2I,HAT1,HMOX1,IMPDH1,ITGB3,MMP2,PRKCB,PTK2B,PT<br>PRF,RAC1,RRM1,SNX1,XRCC6                                                                                                                                                                                                                                                                                                                                                                                                                                                                                                                                                                                                                                                                                                                                                                                                                                                                                                                                                                                                                                                                                                             |
| 195 | Stage I cancer                     | Cancer,Organismal<br>Injury and Abnormalities                                                   | 1.12E,07 | 14  | ALK,B2M,CSF2RB,ERBB4,ESR1,FN1,GART,GGPS1,HSP90AB1,MUC1,PGC,RARA,RARG,RRM1                                                                                                                                                                                                                                                                                                                                                                                                                                                                                                                                                                                                                                                                                                                                                                                                                                                                                                                                                                                                                                                                                                                                                      |
| 196 | Nervous system neoplasm            | Cancer,Neurological<br>Disease,Organismal<br>Injury and Abnormalities                           | 1.24E,07 | 190 | ACACB,ACADSB,ACADVL,ACVR2B,ACY1,ADH7,ALB,ALK,ALOX12,AMY1C (includes<br>others),AOC3,APEX1,APPL1,AR,ARHGAP5,ARHGEF1,ASAP1,ATP7B,ATXN3,B3GAT2,BCR,BMP1,BPI,BTK,<br>C1R,C8A,CLCN5,CRYM,CSDE1,CSF2RB,CSNK1G1,CSNK1G2,CSTF2,CTCF,CUL1,CYP2E1,DAPK2,DCXR,D<br>GKA,DOK2,DPP4,DSG2,EP300,EPAH3,EPS8L2,ERBB4,ESR1,F2,F3,FABP7,FAP,FAS,FCGR2A,FLNB,FN1,G6PD,G<br>AD2,GALNT10,GART,GRK2,GRK6,GTF2I,HADH,HASPIN,HAT1,HBEGF,HDX,HIBCH,HK2,HLA,DRB1,HMB<br>OX1,HMGB3,HMGCS1,HMOX1,HNRNPA2B1,HSD17B10,HSD17B4,HSP90AB1,IDE,IFNG,IFNGR1,IGF1R,IMP<br>DH1,ITGB3,ITPK1,ITSN1,KLK1,KMT5A,KYNU,LRBA,MAGEA4,MAGI2,MAP3K3,MARF1,MATK,MMP2,MS<br>H2,MSN,MTAP,MUC1,MYBPC1,MYBPC3,NAE1,NBEA,NCBP1,NCOA3,NF2,NFATC1,NME3,NMT1,NOTCH1,<br>NR1I3,NSUN5,NUP214,ODC1,OXSR1,PA2G4,PAFAH1B2,PAH,PANK1,PAPSS1,PARN,PATJ,PC,PCYT2,PDHA<br>1,PDK4,PGC,PGK1,PHF24,PIP4K2C,POT1,POU2F1,PPARG,PPP2R1A,PRKCB,PSAP,PTK2B,PTPRE,PTPRF,PUS<br>10,PYGL,RAC1,RARA,RARG,RBBP6,RBM39,RBP5,RGS6,RPA3,RRM1,RTN4IP1,RUVBL1,SART3,SEMA4D,S<br>ENP2,SERPINA5,SFMBT2,SH2B2,SH3YL1,SLC5A1,SLK,SMG5,SMURF2,SNX1,STARD13,SUB1,TAF13,THBS<br>2,TIMM9,TJPI,TLR4,TNFAIP8L2,USP19,UTRN,VAV3,VEGFB,VPS26A,WEE1,WHRN,XIAP,XRCC6,YWHAH,<br>YWHAQ,ZBTB43,ZCWPW1,ZEB2,ZFP28,ZIC3,ZNF292,ZNF462 |
| 197 | Cutaneous melanoma                 | Cancer,Dermatological<br>Diseases and<br>Conditions,Organismal<br>Injury and Abnormalities      | 1.27E,07 | 204 | ACACB,ACADSB,ACSM2A,ADH7,ALB,ALK,ALOX12,AMY1C (includes<br>others),ANG,AOC3,APEX1,APPL1,AR,ARHGAP5,ARHGEF1,ASAP1,ATP7B,ATXN3,B2M,BCR,BMP1,BPI,BTK<br>,BTRC,C1R,C8A,CA8,CAMK4,CANT1,CD1A,CD74,CHKA,CLCN5,CRYM,CSDE1,CSF2RB,CSNK1G2,CSTF2,C<br>TCF,CYP17A1,CYP2E1,CYP7A1,DAPK2,DCTD,DFFA,DGKA,DHPS,DMC1,DOK2,DPP4,DSG2,ECI2,EP300,EP<br>HA3,EPS8L2,ERBB4,ESR1,F2,F3,FABP3,FAP,FAS,FCGR2A, FHIT,FLNB,FN1,GAD2,GALM,GALNT10,GART,G<br>C,GGPS1,GRHPR,GRK2,GTF2I,HASPIN,HAT1,HBB,HBEGF,HCK,HDAC7,HDX,HK2,HLA,DRB1,HMGCS1,HN<br>RNPA2B1,HPD,HSCB,HSD17B10,HSP90AB1,HTR1A,IFNG,IFNGR1,IGF1R,IMPDH1,IQUB,ITGB3,ITPK1,ITPK<br>C,ITSN1,KYNU,LRBA,MAGEA4,MAGI2,MARF1,MARK1,MATK,MDH1,MECR,MEMO1,MMP1,MMP2,MSH2,<br>MSN,MUC1,MYBPC1,MYBPC3,NBEA,NCBP1,NCOA3,NF2,NFATC1,NOTCH1,NR1I3,NSUN5,NUP214,OAT,O<br>DC1,OXSR1,PA2G4,PAFAH1B2,PAH,PANK1,PAPSS1,PARN,PARP3,PATJ,PC,PCYT2,PSK2,PDK3,PDK4,PEX5<br>,PGC,PGK1,PHF24,POT1,POU2F1,PPARG,PPP2R1A,PRKCB,PSAP,PTK2B,PTPRE,PTPRF,PYGL,RAC1,RARA,<br>RARG,RBBP6,RBP5,RGS6,RND1,RPA3,RRM1,RTN4IP1,RUVBL1,SART3,SEC23A,SEM1,SEMA4D,SEN2,SE<br>RPINA5,SFMBT2,SH2B2,SH3YL1,SKP1,SLC5A1,SLK,SMAP1,SMG5,SMG7,SMTN,SMURF2,STARD13,STK4,S                                                                  |

|     |                                 |                                                                                            |          |     |                                                                                                                                                                                                                                                                                                                                                                                                                                                                                                                                                                                                                                                                                                                                                                                                                                                                                                                                                                                                                                                                                                                                                                                                                                            |
|-----|---------------------------------|--------------------------------------------------------------------------------------------|----------|-----|--------------------------------------------------------------------------------------------------------------------------------------------------------------------------------------------------------------------------------------------------------------------------------------------------------------------------------------------------------------------------------------------------------------------------------------------------------------------------------------------------------------------------------------------------------------------------------------------------------------------------------------------------------------------------------------------------------------------------------------------------------------------------------------------------------------------------------------------------------------------------------------------------------------------------------------------------------------------------------------------------------------------------------------------------------------------------------------------------------------------------------------------------------------------------------------------------------------------------------------------|
|     |                                 |                                                                                            |          |     | ULT1A1,SYT13,THBS2,TIMM9,TJP1,TLR4,TRIM21,USP19,UTRN,VAV3,WHRN,WWP1,XIAP,XRCC6,ZCWPW1,ZEB2,ZNF292,ZNF462                                                                                                                                                                                                                                                                                                                                                                                                                                                                                                                                                                                                                                                                                                                                                                                                                                                                                                                                                                                                                                                                                                                                   |
| 198 | Production of hydrogen peroxide | Free Radical Scavenging,Small Molecule Biochemistry                                        | 1.28E,07 | 8   | AOC3,F2,FAS,FCGR2A,HBB,IFNG,RAC1,TLR4                                                                                                                                                                                                                                                                                                                                                                                                                                                                                                                                                                                                                                                                                                                                                                                                                                                                                                                                                                                                                                                                                                                                                                                                      |
| 199 | Liver cancer                    | Cancer,Gastrointestinal Disease,Hepatic System Disease,Organismal Injury and Abnormalities | 1.29E,07 | 137 | ACACB,ACADSB,ACADVL,ACY1,ALB,ALK,ANG,APEX1,AR,ARHGAP5,ASAP1,ATXN3,B2M,B3GAT2,BCR,BTK,BTRC,C1R,C8A,CANT1,CD1A,CDK5R1,CLCN5,CLK1,CSDE1,CSF2RB,CSNK1G1,CTCF,CYP7A1,DGKA,ECHS1,ECI2,EP300,EPHA3,EP8L2,ERBB4,ESR1,EXOSC9,F2,FABP7,FAP,FLNB,FN1,GC,GGPS1,GRHPR,GTF2F2,HBB,HCK,HDAC7,HDX,HIBCH,HK2,HMGB3,HMGCS1,HMOX1,HNRNPA2B1,HPD,HSP90AB1,HTR1A,IDE,IFNGR1,IGF1R,IMPDH1,IQUB,KMT5A,KYNU,MAGI2,MAPK6,MARF1,MDH1,MECR,MMP2,MSH2,MUC1,MYBPC1,MYBPC3,NAE1,NBEA,NCBP1,NCOA3,NF2,NFATC1,NMT1,NOTCH1,NUP214,PAH,PATJ,PC,PCYT2,PDHA1,PK3,PK4,PEX5,PGK1,PHF24,POT1,POU2F1,PPARG,PPP2R1A,PRKCB,PSAP,PTPRE,PTPRF,PYGL,RAC1,RARA,RBBP6,RRM1,SART3,SEC23A,SFMBT2,SLK,SMG7,SMURF2,STARD13,SULT1A1,THBS2,TJP1,TNFAIP8L2,TRIM21,UEVLD,USP19,UTRN,VAV3,VEGFB,WEE1,WWP1,XRCC6,YWHAH,YY1,ZBTB43,ZCWPW1,ZEB2,ZIC3,ZNF292,ZNF462                                                                                                                                                                                                                                                                                                                                                                                                                                    |
| 200 | Adult solid tumor               | Cancer,Organismal Injury and Abnormalities                                                 | 1.40E,07 | 15  | AR,B2M,CSF2RB,DPP4,EP300,FAS,FHIT,GGPS1,HNRNPA2B1,HTR1A,IMPDH1,NOTCH1,POT1,PRKCB,RRM1                                                                                                                                                                                                                                                                                                                                                                                                                                                                                                                                                                                                                                                                                                                                                                                                                                                                                                                                                                                                                                                                                                                                                      |
| 201 | Low,grade lymphoma              | Cancer,Hematological Disease,Immunological Disease,Organismal Injury and Abnormalities     | 1.50E,07 | 35  | ANXA6,ATXN3,BTK,CLK1,CSDE1,CSF2RB,CSTF2,DGKA,ECI2,EP300,ERBB4,FN1,GTF2I,HAT1,HMOX1,HS90AB1,IFNG,IMPDH1,ITGB3,MMP2,NCBP1,NFATC1,NOTCH1,POT1,PRKCB,PTK2B,PTPRF,RAC1,RRM1,SEM1,SNX1,THBS2,VAV3,XRCC6,ZNF292                                                                                                                                                                                                                                                                                                                                                                                                                                                                                                                                                                                                                                                                                                                                                                                                                                                                                                                                                                                                                                   |
| 202 | Hepatobiliary system cancer     | Cancer,Gastrointestinal Disease,Hepatic System Disease,Organismal Injury and Abnormalities | 1.54E,07 | 143 | ACACB,ACADSB,ACADVL,ACY1,ADH1C,ALB,ALK,ANG,APEX1,AR,ARHGAP5,ASAP1,ATXN3,B2M,B3GAT2,BCR,BTK,BTRC,C1R,C8A,CANT1,CD1A,CDK5R1,CLCN5,CLK1,CSDE1,CSF2RB,CSNK1G1,CTCF,CYP7A1,DGKA,DSG2,ECHS1,ECI2,EP300,EPHA3,EP8L2,ERBB4,ESR1,EXOSC9,F2,FABP7,FAP,FLNB,FN1,GC,GGPS1,GRHPR,GTF2F2,HBB,HCK,HDAC7,HDX,HIBCH,HK2,HMGB3,HMGCS1,HMOX1,HNRNPA2B1,HPD,HSP90AB1,HTR1A,IDE,IFNGR1,IGF1R,IMPDH1,IQUB,KIF11,KMT5A,KYNU,MAGI2,MAPK6,MARF1,MDH1,MECR,MMP2,MSH2,MUC1,MYBPC1,MYBPC3,NAE1,NBEA,NCBP1,NCOA3,NF2,NFATC1,NMT1,NOTCH1,NUP214,PA2G4,PAH,PATJ,PC,PCYT2,PDHA1,PK3,PK4,PEX5,PGK1,PHF24,POT1,POU2F1,PPARG,PPP2R1A,PRKCB,PSAP,PTPRE,PTPRF,PYGL,RAC1,RARA,RBBP6,RRM1,SART3,SEC23A,SFMBT2,SH2B2,SLK,SMG7,SMURF2,STARD13,SULT1A1,THBS2,TJP1,TLR4,TNFAIP8L2,TRIM21,UEVLD,USP19,UTRN,VAV3,VEGFB,WEE1,WWP1,XRCC6,YWHAH,YY1,ZBTB43,ZCWPW1,ZEB2,ZIC3,ZNF292,ZNF462                                                                                                                                                                                                                                                                                                                                                                                                  |
| 203 | Skin cancer                     | Cancer,Dermatological Diseases and Conditions,Organismal Injury and Abnormalities          | 1.61E,07 | 208 | ACACB,ACADSB,ACSM2A,ADH7,ALB,ALK,ALOX12,AMY1C (includes others),ANG,AOC3,APEX1,APPL1,AR,ARHGAP5,ARHGEF1,ASAP1,ATP7B,ATXN3,B2M,BCR,BMP1,BPI,BTK,BTRC,C1R,C8A,CA8,CAMK4,CANT1,CD1A,CD74,CHKA,CLCN5,CRYM,CSDE1,CSF2RB,CSNK1G2,CSTF2,CTCF,CYP17A1,CYP2E1,CYP7A1,DAPK2,DCTD,DFFA,DGKA,DHPS,DMC1,DOK2,DPP4,DSG2,ECI2,EP300,EPHA3,EP8L2,ERBB4,ESR1,F2,F3,FABP3,FAP,FAS,FCGR2A,FHIT,FLNB,FN1,GAD2,GALM,GALNT10,GART,GC,GGPS1,GRHPR,GRK2,GRK6,GTF2I,HASPIN,HAT1,HBB,HBEGF,HCK,HDAC7,HDX,HK2,HLA,DRB1,HMGCS1,HNRNPA2B1,HPD,HSCB,HSD17B10,HSP90AB1,HTR1A,IFNG,IFNGR1,IGF1R,IMPDH1,IQUB,ITGB3,ITPK1,ITPKC,ITSN1,KYNU,LRBA,MAGEA4,MAGI2,MARF1,MARK1,MATK,MDH1,MECR,MEMO1,MMP1,MMP2,MSH2,MSN,MUC1,MYBPC1,MYBPC3,NBEA,NCBP1,NCOA3,NF2,NFATC1,NOTCH1,NR1I3,NSUN5,NUP214,OAT,ODC1,OXSR1,PA2G4,PAFAH1B2,PAH,PANK1,PAPSS1,PARN,PARP3,PATJ,PC,PCYT2,PK2,PK3,PK4,PEX5,PGC,PGK1,PHF24,POT1,POU2F1,PPARG,PPP2R1A,PRKCB,PSAP,PTK2B,PTPRE,PTPRF,PYGL,RAC1,RARA,RARG,RBBP6,RBP5,RGS6,RND1,RPA3,RRM1,RTN4IP1,RUVBL1,SART3,SEC23A,SEMI,SEMA4D,SENP2,SERPINA5,SFMBT2,SH2B2,SH3YL1,SKP1,SLC5A1,SLK,SMAP1,SMG5,SMG7,SMTN,SMURF2,STARD13,STK4,SULT1A1,SYT13,THBS2,TIMM9,TJP1,TLR4,TRIM21,UEVLD,USP19,UTRN,VAV3,WHRN,WWP1,XIAP,XRCC6,ZBTB43,ZCWPW1,ZEB2,ZFP28,ZNF292,ZNF462 |
| 204 | Metastatic uterine cancer       | Cancer,Organismal Injury and                                                               | 1.83E,07 | 9   | ALK,AOC3,AR,ESR1,F3,GAD2,GART,HSP90AB1,RRM1                                                                                                                                                                                                                                                                                                                                                                                                                                                                                                                                                                                                                                                                                                                                                                                                                                                                                                                                                                                                                                                                                                                                                                                                |

|     |                                     |                                                                                                                                                                     |          |     |                                                                                                                                                                                                                                                                                                                                                                                                                                                                                                                                                                                                                                                                                                                                                                                                                                                                                                                                                                                                                                                                                                                                                                                                                                                                                                                                                                                                                                                                      |
|-----|-------------------------------------|---------------------------------------------------------------------------------------------------------------------------------------------------------------------|----------|-----|----------------------------------------------------------------------------------------------------------------------------------------------------------------------------------------------------------------------------------------------------------------------------------------------------------------------------------------------------------------------------------------------------------------------------------------------------------------------------------------------------------------------------------------------------------------------------------------------------------------------------------------------------------------------------------------------------------------------------------------------------------------------------------------------------------------------------------------------------------------------------------------------------------------------------------------------------------------------------------------------------------------------------------------------------------------------------------------------------------------------------------------------------------------------------------------------------------------------------------------------------------------------------------------------------------------------------------------------------------------------------------------------------------------------------------------------------------------------|
|     |                                     | Abnormalities, Reproductive System Disease                                                                                                                          |          |     |                                                                                                                                                                                                                                                                                                                                                                                                                                                                                                                                                                                                                                                                                                                                                                                                                                                                                                                                                                                                                                                                                                                                                                                                                                                                                                                                                                                                                                                                      |
| 205 | Steroid metabolism                  | Lipid Metabolism, Small Molecule Biochemistry, Vitamin and Mineral Metabolism                                                                                       | 1.93E,07 | 15  | ACACB, ACAT2, CYP17A1, CYP2E1, CYP2R1, CYP7A1, G6PD, GC, GGPS1, HMGCS1, HSD17B10, HSD17B4, IFNG, SULT1A1, YWHAH                                                                                                                                                                                                                                                                                                                                                                                                                                                                                                                                                                                                                                                                                                                                                                                                                                                                                                                                                                                                                                                                                                                                                                                                                                                                                                                                                      |
| 206 | Female genital tract adenocarcinoma | Cancer, Organismal Injury and Abnormalities, Reproductive System Disease                                                                                            | 2.06E,07 | 147 | AASDHPPT, ACACB, ACADSB, ACBD7, ACY1, ALB, ALK, AOC3, APPL1, AR, ARF6, ARHGEF1, ASAP1, ATP7B, B2M, B3GAT2, BCR, BTK, C8A, CA8, CD1A, CLCN5, CLK1, CSDE1, CSF2RB, CSNK1G1, CSTF2, CTCF, CUL1, CYP7A1, DCTD, DOK2, DPP4, DTYMK, EP300, EPHA3, ERBB4, ESR1, ETF1, F2, F3, FAP, FCGR2A, FLNB, FN1, G6PD, GAD2, GART, GRK2, GTF2I, HBB, HBEGF, HCK, HDX, HMBOX1, HMGB3, HNRNPA2B1, HPD, HSD17B4, HSP90AB1, HTR1A, IGF1R, IQUB, ITGB3, ITPA, ITPKC, ITS1, KIF11, LRBA, MAGEA4, MAGI2, MAP3K3, MAPK6, MARF1, MARK1, MDH1, MEMO1, MMP1, MSN, MUC1, MYBPC3, MYSM1, NBEA, NCBP1, NCOA3, NF2, NFATC1, NMRK1, NMT1, NOTCH1, NR1I3, NT5C3A, NUP214, OAT, ODC1, PANK1, PARN, PARP3, PATJ, PC, PDK3, PDK4, PGC, PGK1, POU2F1, PPARG, PPP2R1A, PTPRE, PTPRF, PYGL, RARA, RARG, RBBP6, RBM39, RGS6, RND1, RRM1, RTN4IP1, RUVBL1, SART3, SENP2, SF3B6, SFMBT2, SH3YL1, SKP1, SLC5A1, SLK, SMG5, SMTN, SMURF2, STK4, SUB1, SYT13, THBS2, TLR4, TRIM21, UEVLD, UTRN, VAV3, WWP1, XIAP, YY1, ZEB2, ZFP28, ZIC3, ZNF292, ZNF462                                                                                                                                                                                                                                                                                                                                                                                                                                                            |
| 207 | Embryonal tumor                     | Cancer, Organismal Injury and Abnormalities                                                                                                                         | 2.20E,07 | 36  | ALK, AR, CSF2RB, CTCF, EP300, EPHA3, ERBB4, FAP, FAP7, FAP, FCGR2A, FN1, GART, GGPS1, HNRNPA2B1, HSP90AB1, IDE, IFNG, IGF1R, ITGB3, MSH2, NAE1, NBEA, NF2, PA2G4, PGK1, PRKCB, RAC1, RARA, RARG, RRM1, TAF13, THBS2, TLR4, UTRN, VAV3, ZEB2                                                                                                                                                                                                                                                                                                                                                                                                                                                                                                                                                                                                                                                                                                                                                                                                                                                                                                                                                                                                                                                                                                                                                                                                                          |
| 208 | Refractory malignant solid tumor    | Cancer, Organismal Injury and Abnormalities                                                                                                                         | 2.25E,07 | 14  | ALB, ALK, AR, BTK, ERBB4, GART, HDAC7, HMOX1, HSP90AB1, IMPDH1, PARP3, PTK2B, RRM1, VEGFB                                                                                                                                                                                                                                                                                                                                                                                                                                                                                                                                                                                                                                                                                                                                                                                                                                                                                                                                                                                                                                                                                                                                                                                                                                                                                                                                                                            |
| 209 | Malignant solid organ tumor         | Cancer, Organismal Injury and Abnormalities                                                                                                                         | 2.27E,07 | 209 | ACACB, ACADSB, ACSM2A, ADH7, ALB, ALK, ALOX12, AMY1C (includes others), ANG, AOC3, APEX1, APPL1, AR, ARHGAP5, ARHGEF1, ASAP1, ATP7B, ATXN3, B2M, BCR, BMP1, BPI, BTK, BTRC, C1R, C8A, CA8, CAMK4, CANT1, CD1A, CD74, CHKA, CLCN5, CRYM, CSDE1, CSF2RB, CSNK1G2, CSTF2, CTCF, CYP17A1, CYP2E1, CYP7A1, DAPK2, DCTD, DFFA, DGKA, DHPS, DMC1, DOK2, DPP4, DSG2, ECI2, EP300, EPHA3, EPS8L2, ERBB4, ESR1, F2, F3, FAPB3, FAP, FAS, FCGR2A, FHIT, FLNB, FN1, GAD2, GALM, GALNT10, GART, GC, GGPS1, GRHPR, GRK2, GRK6, GTF2I, HASPIN, HAT1, HBB, HBEGF, HCK, HDAC7, HDX, HK2, HLA, DRB1, HMGCS1, HNRNPA2B1, HPD, HSCB, HSD17B10, HSP90AB1, HTR1A, IFNG, IFNGR1, IGF1R, IMPDH1, IQUB, ITGB3, ITPK1, ITPKC, ITS1, KMT5A, KYNU, LRBA, MAGEA4, MAGI2, MARF1, MARK1, MATK, MDH1, MECP, MEMO1, MMP1, MMP2, MSH2, MSN, MUC1, MYBPC1, MYBPC3, NBEA, NCBP1, NCOA3, NF2, NFATC1, NOTCH1, NR1I3, NSUN5, NUP214, OAT, ODC1, OXSR1, PA2G4, PAFAH1B2, PAH, PANK1, PAPSS1, PARN, PARP3, PATJ, PC, PCYT2, PDK2, PDK3, PDK4, PEX5, PGC, PGK1, PHF24, POT1, POU2F1, PPARG, PPP2R1A, PRKCB, PSAP, PTK2B, PTPRE, PTPRF, PYGL, RAC1, RARA, RARG, RBBP6, RBP5, RGS6, RND1, RPA3, RRM1, RTN4IP1, RUVBL1, SART3, SEC23A, SEM1, SEMA4D, SENP2, SERPINA5, SFMBT2, SH2B2, SH3YL1, SKP1, SLC5A1, SLK, SMAP1, SMG5, SMG7, SMTN, SMURF2, STARD13, STK4, SULT1A1, SYT13, THBS2, TIMM9, TJP1, TLR4, TRIM21, UEVLD, USP19, UTRN, VAV3, WHRN, WWP1, XIAP, XRCC6, ZBTB43, ZCWPW1, ZEB2, ZFP28, ZNF292, ZNF462 |
| 210 | Binding of DNA                      | Cell Cycle, Gene Expression                                                                                                                                         | 2.48E,07 | 22  | ALB, APEX1, AR, BTK, CYP2E1, EP300, ESR1, F2, F3, FN1, HCK, IFNG, MAP3K3, MUC1, NOTCH1, NR1I3, POU2F1, PPARG, RAC1, RARA, STK4, TLR4                                                                                                                                                                                                                                                                                                                                                                                                                                                                                                                                                                                                                                                                                                                                                                                                                                                                                                                                                                                                                                                                                                                                                                                                                                                                                                                                 |
| 211 | Peripheral vascular disease         | Cardiovascular Disease, Organismal Injury and Abnormalities                                                                                                         | 2.64E,07 | 26  | ALB, AOC3, AR, B2M, C1R, CA8, CSF2RB, DHPS, ESR1, F2, FAPB3, FAS, FCGR2A, HBB, HCK, HIBCH, HLA, DRB1, HTR1A, IGF1R, ITGB3, MARK1, PAH, PPARG, PRKCB, PYGL, SUB1                                                                                                                                                                                                                                                                                                                                                                                                                                                                                                                                                                                                                                                                                                                                                                                                                                                                                                                                                                                                                                                                                                                                                                                                                                                                                                      |
| 212 | Adhesion of T lymphocytes           | Cell, mediated Immune Response, Cell, To, Cell Signaling and Interaction, Cellular Movement, Hematological System Development and Function, Immune Cell Trafficking | 2.76E,07 | 9   | AOC3, ARHGEF1, F2, FAS, FN1, IFNG, PTK2B, RAC1, TLR4                                                                                                                                                                                                                                                                                                                                                                                                                                                                                                                                                                                                                                                                                                                                                                                                                                                                                                                                                                                                                                                                                                                                                                                                                                                                                                                                                                                                                 |



|     |                                       |                                                                                      |          |     |                                                                                                                                                                                                                                                                                                                                                                                                                                                                                                                                                                                                                                                                                                                                                                                                                                                                                                                                                                                                                                                                                                                                                                                                                                                                                                                                                                                                                                                                                                                                                                                       |
|-----|---------------------------------------|--------------------------------------------------------------------------------------|----------|-----|---------------------------------------------------------------------------------------------------------------------------------------------------------------------------------------------------------------------------------------------------------------------------------------------------------------------------------------------------------------------------------------------------------------------------------------------------------------------------------------------------------------------------------------------------------------------------------------------------------------------------------------------------------------------------------------------------------------------------------------------------------------------------------------------------------------------------------------------------------------------------------------------------------------------------------------------------------------------------------------------------------------------------------------------------------------------------------------------------------------------------------------------------------------------------------------------------------------------------------------------------------------------------------------------------------------------------------------------------------------------------------------------------------------------------------------------------------------------------------------------------------------------------------------------------------------------------------------|
| 213 | Transport of molecule                 | Molecular Transport                                                                  | 2.97E,07 | 45  | ALB,ANG,ANXA6,APPL1,ARF6,ATP7B,B2M,CD74,CERT1,CHKA,CLCN5,CRYM,CUL1,CYP2E1,F2,FABP3,FAS,FCGR2A,FN1,GAD2,GC,HBB,HMOX1,HNRNPA2B1,IFNG,IGF1R,ITGB3,MSN,NCBP1,NUP214,PPARG,PRKCB,PSAP,SKP1,SLC5A1,SMG5,SMG7,SNX1,STK4,TIMM9,TTR,USP19,WARS1,WWP1,YWHAH                                                                                                                                                                                                                                                                                                                                                                                                                                                                                                                                                                                                                                                                                                                                                                                                                                                                                                                                                                                                                                                                                                                                                                                                                                                                                                                                     |
| 214 | Transcription                         | Gene Expression                                                                      | 3.06E,07 | 59  | ACVR2B,ANG,APEX1,AR,ATXN3,BTK,BTRC,CAMK4,CD74,CDK5R1,CIAO1,CRYM,CTCF,EP300,ERBB4,ESR1,F2,F3,FN1,GTF2F2,GTF2I,HBB,HDAC7,HLA,DRB1,HMBOX1,HNRNPA2B1,IFNG,KMT5A,MAP3K3,MSN,MYSM1,NCBP1,NCOA3,NFATC1,NOTCH1,NR1I3,PA2G4,PC,POU2F1,PPARG,PRKCB,RAC1,RARA,RARG,RBBP6,SART3,SEMA4D,SFMBT2,SMURF2,SUB1,TAF13,TLR4,WARS1,XRCC6,YWHAH,YWHAQ,YY1,ZEB2,ZIC3                                                                                                                                                                                                                                                                                                                                                                                                                                                                                                                                                                                                                                                                                                                                                                                                                                                                                                                                                                                                                                                                                                                                                                                                                                        |
| 215 | Binding of T lymphocytes              | Cell,To,Cell Signaling and Interaction,Hematological System Development and Function | 3.10E,07 | 10  | AOC3,ARHGEF1,F2,FAS,FN1,IFNG,MSN,PTK2B,RAC1,TLR4                                                                                                                                                                                                                                                                                                                                                                                                                                                                                                                                                                                                                                                                                                                                                                                                                                                                                                                                                                                                                                                                                                                                                                                                                                                                                                                                                                                                                                                                                                                                      |
| 216 | Malignant neoplasm of retroperitoneum | Cancer,Organismal Injury and Abnormalities                                           | 3.17E,07 | 106 | ACACB,ACAT2,ALB,ALK,APPL1,AR,ASAP1,ATP7B,ATXN3,B2M,BPI,BTRC,CANT1,CD74,CDK5R1,CHKA,CLK1,CRYM,CSDE1,CSF2RB,CSTF2,CTCF,CYP17A1,DCTD,DDFA,DPP4,ECHS1,EP300,EPAH3,ERBB4,ESR1,F2,F3,FAP,FLNB,FN1,G6PD,GC,GGPS1,GRHPR,GTF2I,HBB,HBEGF,HCK,HIBCH,HLA,DRB1,HMGCS1,HMOX1,HPD,HSD17B4,HSP90AB1,IGF1R,IMPDH1,ITGB3,ITSN1,KIF11,KLK1,LRBA,MAGI2,MARK1,MMP2,MSH2,MUC1,MYBPC1,MYBPC3,NBEA,NCOA3,NF2,NFATC1,NOTCH1,NR1I3,NUP214,PA2G4,PANK1,PARP3,PC,PDHA1,PDK4,PGK1,POT1,POU2F1,PPARG,PPP2R1A,PRKCB,PTPRE,PYGL,RARA,RARG,RBBP6,RBM39,RBP5,RRM1,S100A6,SFN,SMG7,SMTN,SULT1A1,TJP1,TLR4,UTRN,WEE1,ZCWPW1,ZEB2,ZFP28,ZNF292,ZNF462                                                                                                                                                                                                                                                                                                                                                                                                                                                                                                                                                                                                                                                                                                                                                                                                                                                                                                                                                                     |
| 217 | Differentiation of tumor cell lines   | Cellular Development                                                                 | 3.33E,07 | 18  | CDK5R1,CHKA,CTCF,DPP4,ERBB4,ESR1,FABP7,FN1,HMOX1,HNRNPA2B1,IFNG,IGF1R,KMT5A,MUC1,NOTCH1,PPARG,RARA,RARG                                                                                                                                                                                                                                                                                                                                                                                                                                                                                                                                                                                                                                                                                                                                                                                                                                                                                                                                                                                                                                                                                                                                                                                                                                                                                                                                                                                                                                                                               |
| 218 | Abdominal cancer                      | Cancer,Organismal Injury and Abnormalities                                           | 3.33E,07 | 266 | AASDHPPT,ACACB,ACADSB,ACADVL,ACAT2,ACBD7,ACP3,ACSM2A,ACVR2B,ACY1,ADH1C,ADH7,ALB,ALK,ALOX12,ANG,ANXA6,AOC3,APEX1,APPL1,AR,ARF6,ARHGAP5,ARHGEF1,ASAP1,ATP7B,ATXN3,B2M,B3GAT2,BCR,BMP1,BPI,BTK,BTRC,C1R,C8A,CA8,CAMK4,CANT1,CD1A,CD74,CDK5R1,CHKA,CLCN5,CLK1,CRYM,CSDE1,CSF2RB,CSNK1G1,CSNK1G2,CSTF2,CTCF,CUL1,CYP17A1,CYP2E1,CYP7A1,DAPK2,DCDT,DCXR,DDFA,DGKA,DHPS,DMC1,DOK2,DPP4,DSG2,DTYMK,ECHS1,ECI2,EP300,EPAH3,EP38L2,ERBB4,ESR1,ETF1,EXOSC9,F2,F3,FABP7,FAP,FAS,FCGR2A,FHIT,FLNB,FN1,G6PD,GAD2,GALM,GALNT10,GART,GC,GGPS1,GRHPR,GRK2,GRK6,GTF2F2,GTF2I,HADH,HASPIN,HBB,HBEGF,HCK,HDAC7,HDX,HIBCH,HK2,HLA,DRB1,HMBOX1,HMGB3,HMGCS1,HMOX1,HNRNPA2B1,HPD,HSCB,HSD17B4,HSD17B4,HSP90AB1,HTR1A,IDE,IFNG,IFNGR1,IGF1R,IMPA2,IMPDH1,IQB4,ITGB3,ITPA,ITPK1,ITPKC,ITSN1,KIF11,KLK1,KMT5A,KYNU,LRBA,MAGEA4,MAGI2,MAP3K3,MAPK6,MARF1,MARK1,MATK,MDH1,MECR,MEMO1,MMP1,MMP2,MSH2,MSN,MTAP,MUC1,MYBPC1,MYBPC3,MYSM1,NAE1,NBEA,NCBP1,NCOA3,NF2,NFATC1,NMRK1,NMT1,NOTCH1,NR1I3,NSUN5,NT5C3A,NUP214,OAT,ODC1,OXSR1,PA2G4,PAFAH1B2,PAH,PANK1,PAPSS1,PARN,PARP3,PATJ,PC,PCYT2,PDHA1,PDK2,PDK3,PDK4,PEX5,PGC,PGK1,PHF24,POT1,POU2F1,PPARG,PPP2R1A,PRKCB,PSAP,PTK2B,PTPRE,PTPRF,PUS10,PYGL,RAB26,RAC1,RARA,RARG,RBBP6,RBM39,RBP5,RGS6,RND1,RRM1,RTN4IP1,RUVBL1,S100A6,SART3,SEC23A,SEMA4D,SEN2,SERPINA5,SF3B6,SFMBT2,SFN,SH2B2,SH3YL1,SKP1,SLC5A1,SLK,SMAP1,SMG5,SMG7,SMTN,SMURF2,SNX1,SPEF1,STARD13,STK16,STK4,SUB1,SULT1A1,SYT13,TAF13,THBS2,TJP1,TLR4,TNFAIP8L2,TRIM21,TTR,UEVLD,USP19,UTRN,VAV3,VEGFB,VPS26A,WEE1,WHRN,WWP1,XIAP,XRCC6,YWHAH,YWHAQ,YY1,ZBTB43,ZCWPW1,ZEB2,ZFP28,ZIC3,ZNF292,ZNF462 |
| 219 | Prostatic tumor                       | Cancer,Organismal Injury and Abnormalities,Reproductive System Disease               | 3.58E,07 | 117 | ACACB,ACADVL,ACP3,ALB,ALK,ANXA6,APEX1,APPL1,AR,ARHGAP5,ARHGEF1,B2M,BCR,BTK,C1R,CANT1,CD74,CLK1,CSDE1,CSNK1G1,CUL1,CYP17A1,CYP2E1,CYP7A1,DCTD,DMC1,EP300,EPAH3,EP38L2,ERBB4,ESR1,F2,FABP7,FAP,FAS,FLNB,FN1,GAD2,GALM,GALNT10,GART,GC,GGPS1,HASPIN,HDAC7,HLA,DRB1,HMGB3,HMOX1,HSP90AB1,IFNG,IFNGR1,ITGB3,KMT5A,LRBA,MAGI2,MAPK6,MARF1,MARK1,MATK,MDH1,MMP1,MMP2,MSH2,MUC1,MYBPC1,MYBPC3,NBEA,NCOA3,NF2,NFATC1,NOTCH1,NUP214,ODC1,OXSR1,PAPSS1,PARP3,PC,PDK3,PDK4,PGK1,PHF24,POU2F1,PPARG,PPP2R1A,PRKCB,PSAP,PTK2B,PTPRE,PTPRF,PYGL,RARA,RARG,RRM1,SEMA4D,SEN2,SERPINA5,SF3B6,SFMBT2,SFN,SLK,SMAP1,STK4,TAF13,THBS2,TLR4,TRIM21,TTR,USP19,UTRN,VEGFB,WHRN,XIAP,YWHAQ,YY1,ZEB2,ZNF292,ZNF462                                                                                                                                                                                                                                                                                                                                                                                                                                                                                                                                                                                                                                                                                                                                                                                                                                                                                              |

|     |                                         |                                                                                               |          |     |                                                                                                                                                                                                                                                                                                                                                                                                                                                                                                                                                                                                                                                                                                                                                                                             |
|-----|-----------------------------------------|-----------------------------------------------------------------------------------------------|----------|-----|---------------------------------------------------------------------------------------------------------------------------------------------------------------------------------------------------------------------------------------------------------------------------------------------------------------------------------------------------------------------------------------------------------------------------------------------------------------------------------------------------------------------------------------------------------------------------------------------------------------------------------------------------------------------------------------------------------------------------------------------------------------------------------------------|
| 220 | Angiogenesis                            | Cardiovascular System Development and Function, Organismal Development                        | 3.59E,07 | 30  | ANG,BPI,DGKA,DSG2,F2,F3,FLNB, FN1,GTF2I,HBEGF,HK2,HMOX1,IFNG,ITGB3,KLK1,MMP2,NFATC1,NO TCH1,PATJ,PGK1,PPARG,RAC1,STARD13,THBS2,TJP1,TLR4,VEGFB,WARS1,YARS1,YY1                                                                                                                                                                                                                                                                                                                                                                                                                                                                                                                                                                                                                              |
| 221 | Metabolism of terpenoid                 | Lipid Metabolism, Small Molecule Biochemistry, Vitamin and Mineral Metabolism                 | 3.66E,07 | 17  | ACACB,ACAT2,ADH7,CYP17A1,CYP2E1,CYP2R1,CYP7A1,G6PD,GC,GGPS1,HMGCS1,HSD17B10,HSD17B4, IFNG,SULT1A1,TTR,YWHAH                                                                                                                                                                                                                                                                                                                                                                                                                                                                                                                                                                                                                                                                                 |
| 222 | Migration of mononuclear leukocytes     | Cellular Movement, Hematological System Development and Function, Immune Cell Trafficking     | 3.75E,07 | 15  | AOC3,ARHGEF1,CD74,DPP4,F2,FAS, FN1,IFNG,ITGB3,MSN,PPARG,PTK2B,RAC1,SEMA4D,TLR4                                                                                                                                                                                                                                                                                                                                                                                                                                                                                                                                                                                                                                                                                                              |
| 223 | Cell death of embryonic cell lines      | Cell Death and Survival, Embryonic Development                                                | 4.02E,07 | 18  | AR,ATXN3,F2,FAS,GRK2,HK2,IFNG,IGF1R,NDUFAB1,NF2,PEX5,PPARG,PRKCB,STK4,TNFAIP8L2,XIAP,Y WHAQ,YY1                                                                                                                                                                                                                                                                                                                                                                                                                                                                                                                                                                                                                                                                                             |
| 224 | Oxidation of fatty acid                 | Energy Production, Lipid Metabolism, Small Molecule Biochemistry                              | 4.27E,07 | 10  | ACADVL,ADH1C,A LOX12,ECHS1,HADH,HSD17B10,HSD17B4,MECR,PKD4,PPARG                                                                                                                                                                                                                                                                                                                                                                                                                                                                                                                                                                                                                                                                                                                            |
| 225 | Cell movement of endothelial cell lines | Cardiovascular System Development and Function, Cellular Movement                             | 4.37E,07 | 11  | ESR1,F3, FN1,GTF2I,MMP2,PATJ,PPARG,PTK2B,TLR4,VEGFB,YARS1                                                                                                                                                                                                                                                                                                                                                                                                                                                                                                                                                                                                                                                                                                                                   |
| 226 | Progressive adenocarcinoma              | Cancer, Organismal Injury and Abnormalities, Tumor Morphology                                 | 4.37E,07 | 11  | ALK,AR,CYP17A1,ERBB4,ESR1,GART,HSP90AB1,IGF1R,PARP3,PTK2B,RRM1                                                                                                                                                                                                                                                                                                                                                                                                                                                                                                                                                                                                                                                                                                                              |
| 227 | Progressive neurological disorder       | Neurological Disease                                                                          | 4.68E,07 | 50  | ADH1C,ALB,ANG,AR,BCR,BTK,C1R,CD74,CDK5R1,ERBB4,ESR1,F2,F3,FABP3,FAS,FCGR2A,FHIT,GAD2,G ART,GC,GGPS1,HDAC7,HLA,DRB1,HMOX1,HNRNPA2B1,HSP90AB1,HTR1A,IDE,IFNG,IGF1R,IMPDH1,ITG B3,MDH1,MMP1,MMP2,NAE1,NOTCH1,NUP214,ODC1,PPARG,PRKCB,PSAP,PTPRE,RRM1,S100A6,SMTN,T AF13,TLR4,TTR,XIAP                                                                                                                                                                                                                                                                                                                                                                                                                                                                                                          |
| 228 | Liver carcinoma                         | Cancer, Gastrointestinal Disease, Hepatic System Disease, Organismal Injury and Abnormalities | 4.70E,07 | 133 | ACACB,ACADSB,ACADVL,ACY1,ALB,ALK,APEX1,AR,ARHGAP5,ASAP1,ATXN3,B2M,B3GAT2,BCR,BTK, BTRC,C1R,C8A,CANT1,CD1A,CDK5R1,CLCN5,CLK1,CSDE1,CSF2RB,CSNK1G1,CTCF,CYP7A1,DGKA,ECH S1,ECI2,EP300,EPA3,EP8L2,ERBB4,ESR1,EXOSC9,F2,FABP7,FAP,FLNB, FN1,GC,GGPS1,GRHPR,GTF2F2, HBB,HCK,HDAC7,HDX,HIBCH,HK2,HMGB3,HMGCS1,HMOX1,HNRNPA2B1,HPD,HSP90AB1,HTR1A,IDE,IF NGR1,IGF1R,IMPDH1,IQUB,KMT5A,KYNU,MAGI2,MAPK6,MARF1,MDH1,MECR,MMP2,MSH2,MUC1,MYB PC1,MYBPC3,NAE1,NBEA,NCBP1,NCOA3,NF2,NFATC1,NMT1,NOTCH1,NUP214,PATJ,PC,PCYT2,PDHA1,P DK3,PKD4,PEX5,PGK1,PHF24,POT1,POU2F1,PPARG,PPP2R1A,PRKCB,PSAP,PTPRE,PTPRF,PYGL,RAC1,RA RA,RBBP6,RRM1,SART3,SEC23A,SFMBT2,SLK,SMG7,SMURF2,STARD13,SULT1A1,THBS2,TJP1,TRIM21,U EVLD,USP19,VAV3,VEGFB,WEE1,WWP1,XRCC6,YWHAH,YY1,ZBTB43,ZCWPW1,ZEB2,ZIC3,ZNF292,ZNF4 62 |
| 229 | Microtubule dynamics                    | Cellular Assembly and Organization, Cellular Function and Maintenance                         | 4.81E,07 | 30  | AR,ARF6,ASAP1,ATXN3,BTK,CAMK4,CDK5R1,EPA3,ERBB4,ESR1,F2,F3,FAS,FHIT, FN1,GRK2,HCK,IFNG, ITGB3,KIF11,MATK,MSN,NF2,PRKCB,PTPRF,RAC1,SEMA4D,SLK,SPEF1,TLR4                                                                                                                                                                                                                                                                                                                                                                                                                                                                                                                                                                                                                                     |
| 230 | Progression of carcinoma                | Cancer, Organismal Injury and Abnormalities, Tumor Morphology                                 | 4.84E,07 | 12  | ALK,AR,CYP17A1,ERBB4,ESR1,F3,GART,HSP90AB1,IGF1R,PARP3,PTK2B,RRM1                                                                                                                                                                                                                                                                                                                                                                                                                                                                                                                                                                                                                                                                                                                           |

|     |                                   |                                                                                                                      |          |     |                                                                                                                                                                                                                                                                                                                                                                                                                                                                                                                                                                                                                                                                                                                                                                                                                                |
|-----|-----------------------------------|----------------------------------------------------------------------------------------------------------------------|----------|-----|--------------------------------------------------------------------------------------------------------------------------------------------------------------------------------------------------------------------------------------------------------------------------------------------------------------------------------------------------------------------------------------------------------------------------------------------------------------------------------------------------------------------------------------------------------------------------------------------------------------------------------------------------------------------------------------------------------------------------------------------------------------------------------------------------------------------------------|
| 231 | Binding of lymphatic system cells | Cell,To,Cell Signaling and Interaction                                                                               | 5.22E,07 | 11  | AOC3,ARHGEF1,F2,FAS, FN1,IFNG,ITGB3,MSN,PTK2B,RAC1,TLR4                                                                                                                                                                                                                                                                                                                                                                                                                                                                                                                                                                                                                                                                                                                                                                        |
| 232 | Metabolic bone disease            | Connective Tissue Disorders, Metabolic Disease, Organismal Injury and Abnormalities, Skeletal and Muscular Disorders | 5.25E,07 | 10  | ALB,BMP1,C1R,CLCN5,CYP2R1,ESR1,GGPS1,HNRNPA2B1,NOTCH1,PEX5                                                                                                                                                                                                                                                                                                                                                                                                                                                                                                                                                                                                                                                                                                                                                                     |
| 233 | Cytostasis                        | Cellular Growth and Proliferation                                                                                    | 5.61E,07 | 15  | ALK,CUL1,ESR1,FABP7,FAS,FHIT,GRK2,IFNG,IGF1R,NF2,NME3,NOTCH1,RAC1,RARA,RARG                                                                                                                                                                                                                                                                                                                                                                                                                                                                                                                                                                                                                                                                                                                                                    |
| 234 | Hepatobiliary carcinoma           | Cancer, Gastrointestinal Disease, Organismal Injury and Abnormalities                                                | 5.86E,07 | 139 | ACACB,ACADSB,ACADVL,ACY1,ADH1C,ALB,ALK,APEX1,AR,ARHGAP5,ASAP1,ATXN3,B2M,B3GAT2,B CR,BTK,BTRC,C1R,C8A,CANT1,CD1A,CDK5R1,CLCN5,CLK1,CSDE1,CSF2RB,CSNK1G1,CTCF,CYP7A1,DG KA,DSG2,ECHS1,ECI2,EP300,EPA3,EP8L2,ERBB4,ESR1,EXOSC9,F2,FABP7,FAP,FLNB, FN1,GC,GGPS1,G RHPR,GTF2F2,HBB,HCK,HDAC7,HDX,HIBCH,HK2,HMGB3,HMGCS1,HMOX1,HNRNPA2B1,HPD,HSP90AB 1,HTR1A,IDE,IFNGR1,IGF1R,IMPDH1,IQUB,KIF11,KMT5A,KYNU,MAGI2,MAPK6,MARF1,MDH1,MECR,M MP2,MSH2,MUC1,MYBPC1,MYBPC3,NAE1,NBEA,NCBP1,NCOA3,NF2,NFATC1,NMT1,NOTCH1,NUP214,PA 2G4,PATJ,PC,PCYT2,PDHA1,PDK3,PDK4,PEX5,PGK1,PHF24,POT1,POU2F1,PPARG,PPP2R1A,PRKCB,PSAP, PTPRE,PTPRF,PYGL,RAC1,RARA,RBBP6,RRM1,SART3,SEC23A,SFMBT2,SH2B2,SLK,SMG7,SMURF2,STAR D13,SULT1A1,THBS2,TJP1,TLR4,TRIM21,UEVLD,USP19,VA V3,VEGFB,WEE1,WWP1,XRCC6,YWHAH,YY1, ZBTB43,ZCWPW1,ZEB2,ZIC3,ZNF292,ZNF462 |
| 235 | Prostate cancer                   | Cancer, Organismal Injury and Abnormalities, Reproductive System Disease                                             | 5.89E,07 | 116 | ACACB,ACADVL,ACP3,ALB,ALK,ANXA6,APEX1,APPL1,AR,ARHGAP5,ARHGEF1,B2M,BCR,BTK,C1R,CA NT1,CD74,CLK1,CSDE1,CSNK1G1,CUL1,CYP17A1,CYP2E1,CYP7A1,DCTD,DMC1,EP300,EPA3,EP8L2,ER BB4,ESR1,F2,FABP7,FAP,FAS,FLNB, FN1,GAD2,GALM,GALNT10,GART,GC,GGPS1,HASPIN,HDAC7,HLA,D RB1,HMGB3,HMOX1,HSP90AB1,IFNG,IFNGR1,ITGB3,KMT5A,LRBA,MAGI2,MAPK6,MARF1,MARK1,MAT K,MDH1,MMP1,MMP2,MSH2,MUC1,MYBPC1,MYBPC3,NBEA,NCOA3,NF2,NFATC1,NOTCH1,NUP214,ODC 1,OXSR1,PAPSS1,PARP3,PC,PDK3,PDK4,PGK1,PHF24,POU2F1,PPARG,PPP2R1A,PRKCB,PSAP,PTK2B,PTPR E,PTPRF,PYGL,RARA,RARG,RRM1,SEMA4D,SENP2,SERPINA5,SF3B6,SFMBT2,SFN,SLK,SMAP1,STK4,TAF 13,THBS2,TLR4,TRIM21,TTR,USP19,UTRN,WHRN,XIAP,YWHAQ,YY1,ZEB2,ZNF292,ZNF462                                                                                                                                      |
| 236 | Adhesion of immune cells          | Cell,To,Cell Signaling and Interaction, Hematologic System Development and Function, Immune Cell Trafficking         | 5.93E,07 | 15  | AOC3,ARHGEF1,F2,F3,FAS,FCGR2A, FN1,IFNG,MSN,PPARG,PTK2B,RAC1,SEMA4D,TLR4,UTRN                                                                                                                                                                                                                                                                                                                                                                                                                                                                                                                                                                                                                                                                                                                                                  |
| 237 | Liquid tumor                      | Cancer, Organismal Injury and Abnormalities                                                                          | 6.04E,07 | 84  | ALB,ALK,ALOX12,AMY1C (includes others),APEX1,ARHGAP5,B2M,BCR,BMP1,BTK,BTRC,C8A,CANT1,CD1A,CD74,CDK5R1,CIAO1,CSF2RB,CT CF,CYP2E1,CYP2R1,DPP4,EP300,EPA3,ESR1,ETF1,F2,F3,FAP,FAS,FCGR2A,GAD2,GRK2,GTF2F2,HASPIN, HCK,HLA,DRB1,HMGB3,HNRNPA2B1,HSP90AB1,IFNG,IGF1R,IMPDH1,ITGB3,KLK1,KMT5A,LRBA,MAGE A4,MAGI2,MMP2,MSH2,NCOA3,NOTCH1,NT5C3A,NUP214,PA2G4,PDHA1,PDK3,PDK4,PGC,POT1,PRKCB,P TK2B,PTPRE,PYGL,RAC1,RARA,RARG,RRM1,SH2B2,SMG5,SMG7,SMTN,STK4,SYT13,TAF13,TJP1,TLR4,T XNDC12,UEVLD,VEGFB,WEE1,XIAP,ZEB2                                                                                                                                                                                                                                                                                                                 |
| 238 | Chemotaxis                        | Cellular Movement                                                                                                    | 6.24E,07 | 22  | CD74,CERT1,DAPK2,DGKA,DPP4,ERBB4,FAS, FN1,HBEGF,IFNG,ITGB3,MMP2,NOTCH1,PPARG,PRKCB,PT K2B,RAC1,SEMA4D,THBS2,TLR4,WARS1,YARS1                                                                                                                                                                                                                                                                                                                                                                                                                                                                                                                                                                                                                                                                                                   |
| 239 | Organization of cytoskeleton      | Cellular Assembly and Organization, Cellular Function and Maintenance                                                | 6.50E,07 | 35  | AR,ARF6,ASAP1,ATXN3,BTK,CAMK4,CDK5R1,EPA3,ERBB4,ESR1,F2,F3,FAS,FCGR2A,FHIT, FN1,GRK2,H CK,IFNG,ITGB3,KIF11,MATK,MSN,NDC80,NF2,PARP3,PRKCB,PTPRF,RAC1,RND1,SEMA4D,SLK,SPEF1,TJ P1,TLR4                                                                                                                                                                                                                                                                                                                                                                                                                                                                                                                                                                                                                                          |
| 240 | Transcription of RNA              | Gene Expression                                                                                                      | 7.02E,07 | 53  | ACVR2B,ANG,APEX1,AR,ATXN3,BTK,BTRC,CAMK4,CD74,CDK5R1,CIAO1,CRYM,CTCF,EP300,ERBB4,ES R1,F2, FN1,GTF2F2,GTF2L,HBB,HDAC7,HLA,DRB1,HMBOX1,HNRNPA2B1,IFNG,KMT5A,MAP3K3,MYSM1,                                                                                                                                                                                                                                                                                                                                                                                                                                                                                                                                                                                                                                                       |

|     |                                           |                                                                        |          |     |                                                                                                                                                                                                                                                                                                                                                                                                                                                                                                                                                                                                                                                                                                                                                                                                                                                                                                                                                                                                                                                                                                                                                                                                                                                                                                                                                                                                                                                                                                                                                                            |
|-----|-------------------------------------------|------------------------------------------------------------------------|----------|-----|----------------------------------------------------------------------------------------------------------------------------------------------------------------------------------------------------------------------------------------------------------------------------------------------------------------------------------------------------------------------------------------------------------------------------------------------------------------------------------------------------------------------------------------------------------------------------------------------------------------------------------------------------------------------------------------------------------------------------------------------------------------------------------------------------------------------------------------------------------------------------------------------------------------------------------------------------------------------------------------------------------------------------------------------------------------------------------------------------------------------------------------------------------------------------------------------------------------------------------------------------------------------------------------------------------------------------------------------------------------------------------------------------------------------------------------------------------------------------------------------------------------------------------------------------------------------------|
|     |                                           |                                                                        |          |     | NCBP1,NCOA3,NFATC1,NOTCH1,NR1I3,PA2G4,POU2F1,PPARG,PRKCB,RAC1,RARA,RARG,RBBP6,SEMA4D,SMURF2,SUB1,TAF13,TLR4,XRCC6,YWHAH,YWHAQ,YY1,ZEB2,ZIC3                                                                                                                                                                                                                                                                                                                                                                                                                                                                                                                                                                                                                                                                                                                                                                                                                                                                                                                                                                                                                                                                                                                                                                                                                                                                                                                                                                                                                                |
| 241 | Apoptosis of pancreatic cancer cell lines | Cell Death and Survival                                                | 7.10E,07 | 10  | BTRC,FAS,FHIT,FN1,HBEGF,IFNG,IGF1R,NOTCH1,RRM1,SFN                                                                                                                                                                                                                                                                                                                                                                                                                                                                                                                                                                                                                                                                                                                                                                                                                                                                                                                                                                                                                                                                                                                                                                                                                                                                                                                                                                                                                                                                                                                         |
| 242 | Necrosis of epithelial tissue             | Cell Death and Survival,Organismal Injury and Abnormalities            | 7.24E,07 | 23  | AR,ATXN3,BPI,F2,FAS,GRK2,HK2,IFNG,IGF1R,ITSN1,NDUFAB1,NF2,NOTCH1,PEX5,PPARG,PRKCB,RAC1,STK4,TLR4,TNFAIP8L2,XIAP,YWHAQ,YY1                                                                                                                                                                                                                                                                                                                                                                                                                                                                                                                                                                                                                                                                                                                                                                                                                                                                                                                                                                                                                                                                                                                                                                                                                                                                                                                                                                                                                                                  |
| 243 | Intraabdominal organ tumor                | Cancer,Organismal Injury and Abnormalities                             | 7.35E,07 | 264 | AASDHPPT,ACACB,ACADSB,ACADVL,ACAT2,ACBD7,ACSM2A,ACVR2B,ACY1,ADH7,ALB,ALK,ALOX12,ANG,ANXA6,AOC3,APEX1,APPL1,AR,ARF6,ARHGAP5,ARHGEF1,ASAP1,ATP7B,ATXN3,B2M,B3GAT2,BCR,BMP1,BPI,BTK,BTRC,C1R,C8A,CA8,CAMK4,CANT1,CD1A,CD74,CDK5R1,CHKA,CLCN5,CLK1,CRYM,CSDE1,CSF2RB,CSNK1G1,CSNK1G2,CSTF2,CTCF,CUL1,CYP17A1,CYP2E1,CYP7A1,DAPK2,DCTD,DCXR,DFFA,DGKA,DHPS,DMC1,DOK2,DPP4,DSG2,DTYMK,ECHS1,ECI2,EP300,EPHA3,EPS8L2,ERBB4,ERI1,ESR1,ETF1,EXOSC9,F2,F3,FABP7,FAP,FAS,FCGR2A,FHIT,FLNB,FN1,G6PD,GAD2,GALNT10,GART,GC,GGPS1,GRHPR,GRK2,GRK6,GTF2F2,GTF2I,HADH,HASPIN,HBB,HBEGF,HCK,HDAC7,HDX,HIBCH,HK2,HLA,DRB1,HMBOX1,HMGB3,HMGCS1,HMOX1,HNRNPA2B1,HPD,HSCB,HSD17B10,HSD17B4,HSP90AB1,HTR1A,IDE,IFNG,IFNGR1,IGF1R,IMPA2,IMPDI1,IQUB,ITGB3,ITPA,ITPK1,ITPKC,ITSN1,KIF11,KLK1,KMT5A,KYNU,LRBA,MAGEA4,MAGI2,MAP3K3,MAPK6,MARF1,MARK1,MATK,MDH1,MECR,MEMO1,MMP1,MMP2,MSH2,MSN,MTAP,MUC1,MYBPC1,MYBPC3,MYSM1,NAE1,NBEA,NCBP1,NCOA3,NF2,NFATC1,NMRK1,NMT1,NOTCH1,NR1I3,NSUN5,NT5C3A,NUP214,OAT,ODC1,OXSR1,PA2G4,PAFAH1B2,PAH,PANK1,PAPSS1,PARN,PARP3,PATJ,PC,PCYT2,PDHA1,PDK2,PDK3,PDK4,PEX5,PGC,PGK1,PHF24,POT1,POU2F1,PPARG,PPP2R1A,PRKCB,PSAP,PTK2B,PTPRE,PTPRF,PUS10,PYGL,RAB26,RAC1,RARA,RARG,RBBP6,RBM39,RBP5,RGS6,RND1,RRM1,RTN4IP1,RUVBL1,S100A6,SART3,SEC23A,SEMA4D,SEN2,SERPINA5,SF3B6,SFMBT2,SFN,SH2B2,SH3YL1,SKP1,SLC5A1,SLK,SMAP1,SMG5,SMG7,SMTN,SMURF2,SNX1,SNX2,SPEF1,STARD13,STK16,STK4,SUB1,SULT1A1,SYT13,TAF13,THBS2,TJP1,TLR4,TNFAIP8L2,TRIM21,TTR,UEVLD,USP19,UTRN,VAV3,VEGFB,VPS26A,WEE1,WHRN,WWP1,XIAP,XRCC6,YWHAH,YY1,ZBTB43,ZCWPW1,ZEB2,ZFP28,ZIC3,ZNF292,ZNF462 |
| 244 | Male genital neoplasm                     | Cancer,Organismal Injury and Abnormalities,Reproductive System Disease | 7.43E,07 | 118 | ACACB,ACADVL,ACP3,ALB,ALK,ANXA6,APEX1,APPL1,AR,ARHGAP5,ARHGEF1,B2M,BCR,BTK,C1R,CANT1,CD74,CLK1,CSDE1,CSNK1G1,CUL1,CYP17A1,CYP2E1,CYP7A1,DCTD,DMC1,EP300,EPHA3,EPS8L2,ERBB4,ESR1,F2,FABP7,FAP,FAS,FLNB,FN1,GAD2,GALM,GALNT10,GART,GC,GGPS1,HASPIN,HDAC7,HLA,DRB1,HMGB3,HMOX1,HSP90AB1,IFNG,IFNGR1,ITGB3,KMT5A,LRBA,MAGI2,MAPK6,MARF1,MARK1,MATK,MDH1,MMP1,MMP2,MSH2,MUC1,MYBPC1,MYBPC3,NBEA,NCOA3,NF2,NFATC1,NOTCH1,NUP214,ODC1,OXSR1,PAPSS1,PARP3,PC,PDK3,PDK4,PGK1,PHF24,POU2F1,PPARG,PPP2R1A,PRKCB,PSAP,PTK2B,PTPRE,PTPRF,PYGL,RAC1,RARA,RARG,RRM1,SEMA4D,SEN2,SERPINA5,SF3B6,SFMBT2,SFN,SLK,SMAP1,STK4,TAF13,THBS2,TLR4,TRIM21,TTR,USP19,UTRN,VEGFB,WHRN,XIAP,YWHAQ,YY1,ZEB2,ZNF292,ZNF462                                                                                                                                                                                                                                                                                                                                                                                                                                                                                                                                                                                                                                                                                                                                                                                                                                                                              |
| 245 | Endometrioid carcinoma                    | Cancer,Organismal Injury and Abnormalities                             | 7.68E,07 | 135 | AASDHPPT,ACACB,ACADSB,ACBD7,ACY1,ALB,ALK,AOC3,APPL1,AR,ARHGEF1,ASAP1,ATP7B,B2M,B3GAT2,BCR,BTK,C8A,CA8,CD1A,CLCN5,CLK1,CSDE1,CSF2RB,CSNK1G1,CSTF2,CTCF,CUL1,CYP7A1,DCTD,DOK2,DPP4,DTYMK,EP300,EPHA3,ERBB4,ESR1,ETF1,FAP,FCGR2A,FLNB,FN1,G6PD,GAD2,GRK2,GTF2I,HBEGF,HDX,HMBOX1,HMGB3,HNRNPA2B1,HPD,HSD17B4,HSP90AB1,HTR1A,IGF1R,IQUB,ITGB3,ITPA,ITPKC,KIF11,LRBA,MAGEA4,MAGI2,MAP3K3,MAPK6,MARF1,MARK1,MDH1,MEMO1,MMP1,MSN,MYBPC3,MYSM1,NBEA,NCBP1,NCOA3,NF2,NFATC1,NMRK1,NMT1,NOTCH1,NR1I3,NT5C3A,NUP214,OAT,ODC1,PANK1,PARN,PARP3,PATJ,PC,PDK3,PGK1,POU2F1,PPARG,PPP2R1A,PTPRE,PTPRF,RARA,RARG,RBBP6,RBM39,RGS6,RND1,RRM1,RTN4IP1,RUVBL1,SART3,SEN2,SF3B6,SFMBT2,SH3YL1,SLC5A1,SLK,SMG5,SMTN,SMURF2,STK4,SUB1,SYT13,THBS2,TLR4,TRIM21,UEVLD,UTRN,VAV3,WWP1,XIAP,YY1,ZEB2,ZFP28,ZIC3,ZNF292,ZNF462                                                                                                                                                                                                                                                                                                                                                                                                                                                                                                                                                                                                                                                                                                                                                                          |
| 246 | Primary tumor                             | Cancer,Organismal Injury and Abnormalities                             | 7.72E,07 | 25  | ALB,ALK,B2M,BTK,CDK5R1,CSF2RB,CSNK1G2,DOK2,ERBB4,ESR1,FN1,GART,HSP90AB1,IGF1R,MUC1,NF2,PARP3,PPARG,PPP2R1A,RAC1,RARA,RARG,RRM1,SEMA4D,VEGFB                                                                                                                                                                                                                                                                                                                                                                                                                                                                                                                                                                                                                                                                                                                                                                                                                                                                                                                                                                                                                                                                                                                                                                                                                                                                                                                                                                                                                                |
| 247 | Female genital tract serous carcinoma     | Cancer,Organismal Injury and                                           | 7.83E,07 | 24  | ALK,AOC3,AR,B2M,BCR,CTCF,DPP4,EP300,EPHA3,F3,HBB,HSP90AB1,KIF11,MUC1,NOTCH1,PARP3,PDK4,PPP2R1A,RRM1,SKP1,SMTN,THBS2,TLR4,VAV3                                                                                                                                                                                                                                                                                                                                                                                                                                                                                                                                                                                                                                                                                                                                                                                                                                                                                                                                                                                                                                                                                                                                                                                                                                                                                                                                                                                                                                              |

|     |                                          |                                                                                           |          |     |                                                                                                                                                                                                                                                                                                                                                                                                                                                                                                                                                                                                                                                                                                                                                                                                                                                                                                                                                                                                                                                                                                                                                            |
|-----|------------------------------------------|-------------------------------------------------------------------------------------------|----------|-----|------------------------------------------------------------------------------------------------------------------------------------------------------------------------------------------------------------------------------------------------------------------------------------------------------------------------------------------------------------------------------------------------------------------------------------------------------------------------------------------------------------------------------------------------------------------------------------------------------------------------------------------------------------------------------------------------------------------------------------------------------------------------------------------------------------------------------------------------------------------------------------------------------------------------------------------------------------------------------------------------------------------------------------------------------------------------------------------------------------------------------------------------------------|
|     |                                          | Abnormalities, Reproductive System Disease                                                |          |     |                                                                                                                                                                                                                                                                                                                                                                                                                                                                                                                                                                                                                                                                                                                                                                                                                                                                                                                                                                                                                                                                                                                                                            |
| 248 | Pelvic serous carcinoma                  | Cancer, Organismal Injury and Abnormalities                                               | 7.83E,07 | 24  | ALK,AOC3,AR,B2M,BCR,CTCF,DPP4,EP300,EPA3,F3,HBB,HSP90AB1,KIF11,MUC1,NOTCH1,PARP3,PKK4,PPP2R1A,RRM1,SKP1,SMTN,THBS2,TLR4,VAV3                                                                                                                                                                                                                                                                                                                                                                                                                                                                                                                                                                                                                                                                                                                                                                                                                                                                                                                                                                                                                               |
| 249 | Central nervous system solid tumor       | Cancer, Neurological Disease, Organismal Injury and Abnormalities                         | 7.96E,07 | 186 | ACACB,ACADSB,ACADVL,ACVR2B,ACY1,ADH7,ALB,ALK,ALOX12,AMY1C (includes others),AOC3,APEX1,APPL1,ARHGAP5,ARHGEF1,ASAP1,ATP7B,ATXN3,B3GAT2,BCR,BMP1,BPI,BTK,C1R,C8A,CLCN5,CRYM,CSDE1,CSF2RB,CSNK1G1,CSNK1G2,CSTF2,CTCF,CUL1,CYP2E1,DAPK2,DCXR,DGKA,DOK2,DPP4,DSG2,EP300,EPA3,EP8L2,ERBB4,ESR1,F2,FABP7,FAS,FCGR2A,FLNB,FN1,G6PD,GAD2,GALNT10,GART,GRK2,GRK6,GTF2I,HADH,HASPIN,HAT1,HBEGF,HDX,HIBCH,HK2,HLA,DRB1,HMBOX1,HMGB3,HMGCS1,HMOX1,HNRNPA2B1,HSD17B10,HSD17B4,HSP90AB1,IDE,IFNG,IFNGR1,IGF1R,IMPDH1,ITGB3,ITPK1,ITSN1,KLK1,KMT5A,KYNU,LRBA,MAGEA4,MAGI2,MAP3K3,MARF1,MATK,MMP2,MSH2,MSN,M TAP,MUC1,MYBPC1,MYBPC3,NAE1,NBEA,NCBP1,NCOA3,NF2,NFATC1,NME3,NMT1,NOTCH1,NR1I3,NSU N5,NUP214,ODC1,OXSR1,PA2G4,PAFAH1B2,PAH,PANK1,PAPSS1,PARN,PATJ,PC,PCYT2,PDHA1,PDK4,PG C,PGK1,PHF24,PIP4K2C,POT1,POU2F1,PPARG,PPP2R1A,PRKCB,PSAP,PTK2B,PTPRE,PTPRF,PUS10,PYGL,R AC1,RARA,RARG,RBBP6,RBM39,RBP5,RGS6,RRM1,RTN4IP1,SART3,SEMA4D,SENP2,SERPINA5,SFMBT2, SH2B2,SH3YL1,SLC5A1,SLK,SMG5,SMURF2,SNX1,STARD13,SUB1,TAF13,THBS2,TIMM9,TJP1,TLR4,TNFA IP8L2,USP19,UTRN,VAV3,VEGFB,VPS26A,WEE1,WHRN,XIAP,XRCC6,YWHAH,YWHAQ,ZBTB43,ZCWPW1 ,ZEB2,ZFP28,ZIC3,ZNF292,ZNF462 |
| 250 | Abnormality of skin morphology           | Dermatological Diseases and Conditions, Organismal Injury and Abnormalities               | 7.98E,07 | 22  | ALOX12,B2M,CD74,FABP7,FN1,G6PD,HBB,HLA,DRB1,IDE,IFNG,IGF1R,IMPDH1,MMP1,ODC1,PPARG,PRK CB,RAC1,RARA,RARG,RBBP6,RRM1,SART3                                                                                                                                                                                                                                                                                                                                                                                                                                                                                                                                                                                                                                                                                                                                                                                                                                                                                                                                                                                                                                   |
| 251 | Lung squamous cell carcinoma             | Cancer, Organismal Injury and Abnormalities, Respiratory Disease                          | 8.20E,07 | 45  | ALK,ANXA6,AR,B2M,BTK,C8A,CAMK4,CERT1,CLK1,CUL1,CYP2E1,EP300,EPA3,ERBB4,FAP,FN1,GART, HASPIN,HDX,HNRNPA2B1,HSP90AB1,IGF1R,ITPKC,MAPK6,MATK,MDH1,NOTCH1,OXSR1,PANK1,PARP3 ,PATJ,PDK4,PPARG,PPP2R1A,PTK2B,PTPRE,PTPRF,RGS6,RRM1,SENP2,SLK,STK4,TLR4,TTR,WWP1                                                                                                                                                                                                                                                                                                                                                                                                                                                                                                                                                                                                                                                                                                                                                                                                                                                                                                  |
| 252 | Cell movement of mononuclear leukocytes  | Cellular Movement, Hematological System Development and Function, Immune Cell Trafficking | 8.31E,07 | 17  | AOC3,ARHGEF1,CD74,DPP4,F2,FAS,FN1,IFNG,ITGB3,MSN,PPARG,PRKCB,PTK2B,RAC1,SEMA4D,TLR4,Y ARS1                                                                                                                                                                                                                                                                                                                                                                                                                                                                                                                                                                                                                                                                                                                                                                                                                                                                                                                                                                                                                                                                 |
| 253 | Production of superoxide                 | Free Radical Scavenging                                                                   | 8.42E,07 | 9   | F2,FAS,FCGR2A,G6PD,HBB,IFNG,PRKCB,RAC1,TLR4                                                                                                                                                                                                                                                                                                                                                                                                                                                                                                                                                                                                                                                                                                                                                                                                                                                                                                                                                                                                                                                                                                                |
| 254 | Malignant neoplasm of male genital organ | Cancer, Organismal Injury and Abnormalities, Reproductive System Disease                  | 8.44E,07 | 117 | ACACB,ACADVL,ACP3,ALB,ALK,ANXA6,APEX1,APPL1,AR,ARHGAP5,ARHGEF1,B2M,BCR,BTK,C1R,CAN T1,CD74,CLK1,CSDE1,CSNK1G1,CUL1,CYP17A1,CYP2E1,CYP7A1,DCTD,DMC1,EP300,EPA3,EP8L2,ER BB4,ESR1,F2,FABP7,FAP,FAS,FLNB,FN1,GAD2,GALM,GALNT10,GART,GC,GGPS1,HASPIN,HDAC7,HLA,D RB1,HMGB3,HMOX1,HSP90AB1,IFNG,IFNGR1,ITGB3,KMT5A,LRBA,MAGI2,MAPK6,MARF1,MARK1,MAT K,MDH1,MMP1,MMP2,MSH2,MUC1,MYBPC1,MYBPC3,NBEA,NCOA3,NF2,NFATC1,NOTCH1,NUP214,ODC 1,OXSR1,PAPSS1,PARP3,PC,PDK3,PDK4,PGK1,PHF24,POU2F1,PPARG,PPP2R1A,PRKCB,PSAP,PTK2B,PTPR E,PTPRF,PYGL,RAC1,RARA,RARG,RRM1,SEMA4D,SENP2,SERPINA5,SF3B6,SFMBT2,SFN,SLK,SMAP1,ST K4,TAF13,THBS2,TLR4,TRIM21,TTR,USP19,UTRN,WHRN,XIAP,YWHAQ,YY1,ZEB2,ZNF292,ZNF462                                                                                                                                                                                                                                                                                                                                                                                                                                                              |
| 255 | Progressed metastatic solid tumor        | Cancer, Organismal Injury and Abnormalities, Tumor Morphology                             | 8.71E,07 | 11  | ALK,AR,CYP17A1,ERBB4,GART,HSP90AB1,IGF1R,PARP3,PTK2B,RRM1,VEGFB                                                                                                                                                                                                                                                                                                                                                                                                                                                                                                                                                                                                                                                                                                                                                                                                                                                                                                                                                                                                                                                                                            |
| 256 | Primary solid tumor                      | Cancer, Organismal Injury and Abnormalities                                               | 8.99E,07 | 25  | ALB,ALK,B2M,BTK,CDK5R1,CSF2RB,CSNK1G2,DOK2,ERBB4,ESR1,FN1,GART,HSP90AB1,IGF1R,MUC1,N F2,PARP3,PPARG,PPP2R1A,RAC1,RARA,RARG,RRM1,SEMA4D,VEGFB                                                                                                                                                                                                                                                                                                                                                                                                                                                                                                                                                                                                                                                                                                                                                                                                                                                                                                                                                                                                               |
| 257 | Infection of cells                       | Infectious Diseases                                                                       | 9.27E,07 | 36  | ACACB,ACADSB,ACP3,ARF6,B2M,BCR,BMP1,C1R,CANT1,CD74,DAPK2,DPP4,EP300,ETF1,F2,FAS,FN1,GR K2,HIBCH,HMGCS1,IFNG,IQUB,LARS1,NF2,NMT1,NUP214,PANK1,PRKCB,RAC1,RARA,RND1,SUB1,TLR4, TRIM21,XIAP,ZNF292                                                                                                                                                                                                                                                                                                                                                                                                                                                                                                                                                                                                                                                                                                                                                                                                                                                                                                                                                            |

|     |                                            |                                                                                                                                   |          |     |                                                                                                                                                                                                                                                                                                                                                                                                                                                                                                                                                                                                                                                                                                                                                                                                                                                                                                                                                                                                                                                                                                                                                                                                                                                                                                                                                                                                                                                                                                                                                                                                                                                                                                                                                                                                                        |
|-----|--------------------------------------------|-----------------------------------------------------------------------------------------------------------------------------------|----------|-----|------------------------------------------------------------------------------------------------------------------------------------------------------------------------------------------------------------------------------------------------------------------------------------------------------------------------------------------------------------------------------------------------------------------------------------------------------------------------------------------------------------------------------------------------------------------------------------------------------------------------------------------------------------------------------------------------------------------------------------------------------------------------------------------------------------------------------------------------------------------------------------------------------------------------------------------------------------------------------------------------------------------------------------------------------------------------------------------------------------------------------------------------------------------------------------------------------------------------------------------------------------------------------------------------------------------------------------------------------------------------------------------------------------------------------------------------------------------------------------------------------------------------------------------------------------------------------------------------------------------------------------------------------------------------------------------------------------------------------------------------------------------------------------------------------------------------|
| 258 | Abdominal carcinoma                        | Cancer, Organismal Injury and Abnormalities                                                                                       | 9.32E,07 | 260 | AASDHPPT, ACACB, ACADSB, ACADVL, ACAT2, ACBD7, ACSM2A, ACVR2B, ACY1, ADH1C, ADH7, ALB, ALK, ALOX12, ANXA6, AOC3, APEX1, APPL1, AR, ARF6, ARHGAP5, ARHGEF1, ASAP1, ATP7B, ATXN3, B2M, B3GAT2, BCR, BMP1, BPI, BTK, BTRC, C1R, C8A, CA8, CAMK4, CANT1, CD1A, CD74, CDK5R1, CHKA, CLCN5, CLK1, CRYM, CSDE1, CSF2RB, CSNK1G1, CSNK1G2, CSTF2, CTCF, CUL1, CYP17A1, CYP2E1, CYP7A1, DAPK2, DCTD, DCXR, DFFA, DGKA, DHPS, DMC1, DOK2, DPP4, DSG2, DTYMK, ECHS1, ECI2, EP300, EPHA3, EPS8L2, ERBB4, ESR1, ETF1, EXOSC9, F2, F3, FABP7, FAP, FAS, FCGR2A, FHIT, FLNB, FN1, G6PD, GAD2, GALM, GALNT10, GART, GC, GGSI1, GRHR, GRK2, GRK6, GTF2F2, GTF2I, HADH, HASPIN, HBB, HBEGF, HCK, HDAC7, HDX, HIBCH, HK2, HLA, DRB1, HMBOX1, HMGB3, HMGCS1, HMOX1, HNRNPA2B1, HPD, HSCB, HSD17B10, HSD17B4, HSP90AB1, HTR1A, IDE, IFNG, IFNGR1, IGF1R, IMPA2, IMPDH1, IQUB, ITGB3, ITPA, ITPK1, ITPKC, ITSN1, KIF11, KLK1, KMT5A, KYNU, LRBA, MAGEA4, MAGI2, MAP3K3, MAPK6, MARF1, MARK1, MATK, MDH1, MECP1, MEMO1, MMP1, MMP2, MSH2, MSN, MTAP, MUC1, MYBPC1, MYBPC3, MYSM1, NAE1, NBEA, NCBP1, NCOA3, NF2, NFATC1, NMRK1, NMT1, NOTCH1, NR1H3, NSUN5, NT5C3A, NUP214, OAT, ODC1, OXSR1, PA2G4, PAFAH1B2, PAH, PANK1, PAPSS1, PARN, PRR3, PATJ, PC, PCYT2, PDHA1, PDK2, PDK3, PDK4, PEX5, PGC, PGK1, PHF24, POT1, POU2F1, PPARG, PPP2R1A, PRKCB, PSAP, PTK2B, PTPRE, PTPRF, PUS10, PYGL, RAB26, RAC1, RARA, RARG, RBBP6, RBM39, RBP5, RGS6, RND1, RRM1, RTN4IP1, RUVBL1, SART3, SEC23A, SEMA4D, SENP2, SERPINA5, SF3B6, SFMBT2, SFN, SH2B2, SH3YL1, SKP1, SLC5A1, SLK, SMAP1, SMG5, SMG7, SMTN, SMURF2, SNX1, SPEF1, STARD13, STK16, STK4, SUB1, SULT1A1, SYT13, TAF13, THBS2, TJP1, TLR4, TRIM21, UEVLD, USP19, UTRN, VAV3, VEGFB, VPS26A, WEE1, WHRN, WWP1, XIAP, XRCC6, YWHAH, YY1, ZBTB43, ZCWPW1, ZEB2, ZFP28, ZIC3, ZNF292, ZNF462 |
| 259 | Myelodysplastic syndrome or leukemia       | Cancer, Hematological Disease, Organismal Injury and Abnormalities                                                                | 9.80E,07 | 82  | ALB, ALK, ALOX12, AMY1C (includes others), APEX1, ARHGAP5, B2M, BCR, BTK, BTRC, C8A, CANT1, CD1A, CD74, CDK5R1, CIAO1, CSF2RB, CTCF, CYP2E1, CYP2R1, DPP4, EP300, EPHA3, ESR1, ETF1, F2, F3, FAP, FAS, FCGR2A, GAD2, GRK2, GTF2F2, HASPIN, HCK, HLA, DRB1, HNRNPA2B1, HSP90AB1, IFNG, IGF1R, IMPDH1, ITGB3, KLK1, KMT5A, LRBA, MAGEA4, MAGI2, MMP2, MSH2, NCOA3, NOTCH1, NT5C3A, NUP214, PA2G4, PDHA1, PDK3, PDK4, PGC, POT1, PRKCB, PTK2B, PTPRE, PYGL, RAC1, RARA, RARG, RRM1, SH2B2, SMG5, SMG7, SMTN, STK4, SYT13, TAF13, TJP1, TLR4, TXNDC12, UEVLD, VEGFB, WEE1, XIAP, ZEB2                                                                                                                                                                                                                                                                                                                                                                                                                                                                                                                                                                                                                                                                                                                                                                                                                                                                                                                                                                                                                                                                                                                                                                                                                                      |
| 260 | Cell viability of breast cancer cell lines | Cell Death and Survival                                                                                                           | 9.98E,07 | 17  | APEX1, BTRC, EP300, ERBB4, FN1, IGF1R, ITGB3, KIF11, NME3, NT5C3A, PDHA1, PTK2B, PTPRE, RRM1, RUVBL1, SEM1, SFN                                                                                                                                                                                                                                                                                                                                                                                                                                                                                                                                                                                                                                                                                                                                                                                                                                                                                                                                                                                                                                                                                                                                                                                                                                                                                                                                                                                                                                                                                                                                                                                                                                                                                                        |
| 261 | Glycolysis of tumor cell lines             | Carbohydrate Metabolism, Cellular Function and Maintenance                                                                        | 1.03E,06 | 8   | ESR1, HK2, IGF1R, ITGB3, NCOA3, PDHA1, PDK4, SENP2                                                                                                                                                                                                                                                                                                                                                                                                                                                                                                                                                                                                                                                                                                                                                                                                                                                                                                                                                                                                                                                                                                                                                                                                                                                                                                                                                                                                                                                                                                                                                                                                                                                                                                                                                                     |
| 262 | Cell death of colorectal cancer cell lines | Cell Death and Survival                                                                                                           | 1.03E,06 | 21  | BTK, DAPK2, DFFA, DSG2, DTYMK, EP300, FAS, HMOX1, IFNG, MUC1, NF2, NOTCH1, PPARG, RAC1, SFN, SMURF2, SNX1, TLR4, WEE1, XIAP, YWHAH                                                                                                                                                                                                                                                                                                                                                                                                                                                                                                                                                                                                                                                                                                                                                                                                                                                                                                                                                                                                                                                                                                                                                                                                                                                                                                                                                                                                                                                                                                                                                                                                                                                                                     |
| 263 | High, risk neoplasia                       | Cancer, Organismal Injury and Abnormalities                                                                                       | 1.03E,06 | 13  | ALB, ALK, AR, BTK, CSF2RB, CYP17A1, ERBB4, ESR1, HSP90AB1, IMPDH1, RARA, RARG, RRM1                                                                                                                                                                                                                                                                                                                                                                                                                                                                                                                                                                                                                                                                                                                                                                                                                                                                                                                                                                                                                                                                                                                                                                                                                                                                                                                                                                                                                                                                                                                                                                                                                                                                                                                                    |
| 264 | Adult T cell leukemia                      | Cancer, Hematological Disease, Immunological Disease, Organismal Injury and Abnormalities                                         | 1.04E,06 | 10  | B2M, CD1A, FAS, HNRNPA2B1, IMPDH1, NOTCH1, POT1, PRKCB, RARA, RRM1                                                                                                                                                                                                                                                                                                                                                                                                                                                                                                                                                                                                                                                                                                                                                                                                                                                                                                                                                                                                                                                                                                                                                                                                                                                                                                                                                                                                                                                                                                                                                                                                                                                                                                                                                     |
| 265 | Non, Hodgkin cutaneous lymphoma            | Cancer, Dermatological Diseases and Conditions, Hematological Disease, Immunological Disease, Organismal Injury and Abnormalities | 1.07E,06 | 14  | CTCF, DPP4, EPHA3, FAS, HSP90AB1, NOTCH1, ODC1, POT1, PRKCB, PTPRE, RARA, RARG, RRM1, TLR4                                                                                                                                                                                                                                                                                                                                                                                                                                                                                                                                                                                                                                                                                                                                                                                                                                                                                                                                                                                                                                                                                                                                                                                                                                                                                                                                                                                                                                                                                                                                                                                                                                                                                                                             |
| 266 | Fibrosis                                   | Organismal Injury and Abnormalities                                                                                               | 1.12E,06 | 26  | ALB, AR, B2M, BMP1, FAS, FN1, GRHR, HBEGF, HMGB3, HMGCS1, IFNG, IFNGR1, IMPDH1, ITGB3, MMP1, MYBPC1, NMT1, NOTCH1, PAH, PARN, PPARG, PTPRE, SERPINA5, SMURF2, STK4, TLR4                                                                                                                                                                                                                                                                                                                                                                                                                                                                                                                                                                                                                                                                                                                                                                                                                                                                                                                                                                                                                                                                                                                                                                                                                                                                                                                                                                                                                                                                                                                                                                                                                                               |

|     |                                     |                                                                                                              |          |     |                                                                                                                                                                                                                                                                                                                                                                                                                                                                                                                                                                                                                                                                                                                                                                                                                                                                                                   |
|-----|-------------------------------------|--------------------------------------------------------------------------------------------------------------|----------|-----|---------------------------------------------------------------------------------------------------------------------------------------------------------------------------------------------------------------------------------------------------------------------------------------------------------------------------------------------------------------------------------------------------------------------------------------------------------------------------------------------------------------------------------------------------------------------------------------------------------------------------------------------------------------------------------------------------------------------------------------------------------------------------------------------------------------------------------------------------------------------------------------------------|
| 267 | Cell movement of blood cells        | Cellular Movement                                                                                            | 1.18E,06 | 25  | ALB,AOC3,ARHGEF1,CD74,DAPK2,DOK2,DPP4,F2,FAS,FCGR2A,FN1,HMOX1,IFNG,ITGB3,MMP1,MSN,PA2G4,PPARG,PRKCB,PTK2B,RAC1,SEMA4D,STK4,TLR4,YARS1                                                                                                                                                                                                                                                                                                                                                                                                                                                                                                                                                                                                                                                                                                                                                             |
| 268 | Lymphocytic leukemia                | Cancer,Hematological Disease,Immunological Disease,Organismal Injury and Abnormalities                       | 1.20E,06 | 48  | ALB,ALK,ALOX12,ARHGAP5,B2M,BTK,C8A,CD1A,CD74,CDK5R1,CIAO1,CTCF,DPP4,EP300,F2,F3,FAS,FCGR2A,GAD2,GRK2,GTF2F2,HASPIN,HCK,HNRNPA2B1,HSP90AB1,IFNG,IMPDH1,ITGB3,LRBA,MAGI2,NCOA3,NOTCH1,PGC,POT1,PRKCB,PTK2B,PTPRE,PYGL,RARA,RRM1,SH2B2,SMG5,SYT13,TAF13,TLR4,TXNDC12,XIAP,ZEB2                                                                                                                                                                                                                                                                                                                                                                                                                                                                                                                                                                                                                       |
| 269 | Cleavage of RNA                     | RNA Post,Transcriptional Modification                                                                        | 1.24E,06 | 5   | ANG,APEX1,HBB,IFNG,SEN2                                                                                                                                                                                                                                                                                                                                                                                                                                                                                                                                                                                                                                                                                                                                                                                                                                                                           |
| 270 | Ruffling                            | Cell Morphology                                                                                              | 1.26E,06 | 7   | ARF6,FCGR2A,GRK2,HMOX1,IQUB,NF2,RAC1                                                                                                                                                                                                                                                                                                                                                                                                                                                                                                                                                                                                                                                                                                                                                                                                                                                              |
| 271 | Binding of breast cancer cell lines | Cell,To,Cell Signaling and Interaction                                                                       | 1.26E,06 | 10  | ARHGEF1,ESR1,FN1,GRK6,IGF1R,ITGB3,MMP2,SERPINA5,SNX1,TJP1                                                                                                                                                                                                                                                                                                                                                                                                                                                                                                                                                                                                                                                                                                                                                                                                                                         |
| 272 | Adhesion of mononuclear leukocytes  | Cell,To,Cell Signaling and Interaction,Hematological System Development and Function,Immune Cell Trafficking | 1.26E,06 | 10  | AOC3,ARHGEF1,F2,FAS,FN1,IFNG,PPARG,PTK2B,RAC1,TLR4                                                                                                                                                                                                                                                                                                                                                                                                                                                                                                                                                                                                                                                                                                                                                                                                                                                |
| 273 | Migration of tumor cell lines       | Cellular Movement                                                                                            | 1.36E,06 | 43  | ALOX12,APPL1,AR,ARF6,ARHGEF1,DPP4,ESR1,F2,F3,FABP7,FHIT,FLNB,FN1,GRK6,HBEGF,HMOX1,HNRNPA2B1,IFNG,IGF1R,ITGB3,MAPK6,MATK,MMP1,MMP2,MSN,MUC1,NCOA3,NF2,NOTCH1,PTK2B,RAC1,RARG,RUVBL1,SEMA4D,SERPINA5,SFN,THBS2,TLR4,VAV3,VEGFB,XIAP,YY1,ZEB2                                                                                                                                                                                                                                                                                                                                                                                                                                                                                                                                                                                                                                                        |
| 274 | Liver lesion                        | Gastrointestinal Disease,Hepatic System Disease,Organismal Injury and Abnormalities                          | 1.39E,06 | 152 | ACACB,ACADSB,ACADVL,ACY1,ALB,ALK,ANG,APEX1,AR,ARHGAP5,ASAP1,ATP7B,ATXN3,B2M,B3GAT2,BCR,BTK,BTRC,C1R,C8A,CANT1,CD1A,CDK5R1,CLCN5,CLK1,CSDE1,CSF2RB,CSNK1G1,CTCF,CUL1,CYP2E1,CYP7A1,DGKA,ECHS1,ECI2,EP300,EPA3,EP8L2,ERBB4,ERI1,ESR1,EXOSC9,F2,FABP7,FAP,FAS,FCGR2A,FLNB,FN1,GALNT10,GC,GGPS1,GRHPR,GTF2F2,GTF2I,HADH,HBB,HCK,HDAC7,HDX,HIBCH,HK2,HMGB3,HMGCS1,HMOX1,HNRNPA2B1,HPD,HSP90AB1,HTR1A,IDE,IFNG,IFNGR1,IGF1R,IMPDH1,IQUB,KMT5A,KYNU,MAGI2,MAPK6,MARF1,MDH1,MECR,MMP2,MSH2,MSN,MUC1,MYBPC1,MYBPC3,NAE1,NBEA,NCBP1,NCOA3,NF2,NFATC1,NMT1,NOTCH1,NT5C3A,NUP214,PAH,PATJ,PC,PCYT2,PDHA1,PDK3,PDK4,PEX5,PGK1,PHF24,POT1,POU2F1,PPARG,PPP2R1A,PRKCB,PSAP,PTPRE,PTPRF,PYGL,RAC1,RARA,RBBP6,RRM1,SART3,SEC23A,SERPINA5,SFMBT2,SLK,SMG7,SMURF2,SNX22,STARD13,SULT1A1,THBS2,TJP1,TLR4,TNFAIP8L2,TRIM21,UEVLD,USP19,UTRN,VAV3,VEGFB,WEE1,WWP1,XRCC6,YWHAH,YY1,ZBTB43,ZCWPW1,ZEB2,ZIC3,ZNF292,ZNF462 |
| 275 | Acne                                | Dermatological Diseases and Conditions,Inflammatory Disease,Organismal Injury and Abnormalities              | 1.51E,06 | 10  | AR,DHPS,ESR1,G6PD,MMP1,MMP2,ODC1,RARA,RARG,TLR4                                                                                                                                                                                                                                                                                                                                                                                                                                                                                                                                                                                                                                                                                                                                                                                                                                                   |
| 276 | Lymphocyte migration                | Cellular Movement,Hematological System Development and Function,Immune Cell Trafficking                      | 1.51E,06 | 13  | AOC3,ARHGEF1,CD74,DPP4,F2,FAS,FN1,IFNG,ITGB3,MSN,PTK2B,RAC1,TLR4                                                                                                                                                                                                                                                                                                                                                                                                                                                                                                                                                                                                                                                                                                                                                                                                                                  |
| 277 | Stage IIIA,IV breast cancer         | Cancer,Organismal Injury and Abnormalities,Reproductive System Disease                                       | 1.53E,06 | 8   | ALB,AR,ERBB4,ESR1,GGPS1,HSP90AB1,PARP3,RRM1                                                                                                                                                                                                                                                                                                                                                                                                                                                                                                                                                                                                                                                                                                                                                                                                                                                       |
| 278 | Allergy of skin                     | Dermatological Diseases and Conditions,Immunologic                                                           | 1.53E,06 | 8   | AR,C1R,DPP4,ESR1,G6PD,IFNG,PRKCB,TLR4                                                                                                                                                                                                                                                                                                                                                                                                                                                                                                                                                                                                                                                                                                                                                                                                                                                             |

|     |                                                    |                                                                                                                                  |          |    |                                                                                                                                                                                                                                                                                                                                                                                                                                                                                 |
|-----|----------------------------------------------------|----------------------------------------------------------------------------------------------------------------------------------|----------|----|---------------------------------------------------------------------------------------------------------------------------------------------------------------------------------------------------------------------------------------------------------------------------------------------------------------------------------------------------------------------------------------------------------------------------------------------------------------------------------|
|     |                                                    | al Disease,Organismal Injury and Abnormalities                                                                                   |          |    |                                                                                                                                                                                                                                                                                                                                                                                                                                                                                 |
| 279 | Early stage tumor                                  | Cancer,Organismal Injury and Abnormalities                                                                                       | 1.56E,06 | 17 | ALB,ALK,B2M,BTK,CD74,CSF2RB,ERBB4,ESR1,FN1,GART,GGPS1,HSP90AB1,MUC1,PGC,RARA,RARG,RRM1                                                                                                                                                                                                                                                                                                                                                                                          |
| 280 | Sickle cell anemia                                 | Cardiovascular Disease,Connective Tissue Disorders,Hematological Disease,Hereditary Disorder,Organismal Injury and Abnormalities | 1.65E,06 | 10 | F3,GRHPR,HBB,HMOX1,IFNG,IMPDH1,KLK1,PTPRE,RRM1,TAF13                                                                                                                                                                                                                                                                                                                                                                                                                            |
| 281 | Leukemia                                           | Cancer,Hematological Disease,Immunological Disease,Organismal Injury and Abnormalities                                           | 1.73E,06 | 79 | ALB,ALK,ALOX12,AMY1C (includes others),APEX1,ARHGAP5,B2M,BCR,BTK,BTRC,C8A,CANT1,CD1A,CD74,CDK5R1,CIAO1,CSF2RB,CTCF,CYP2E1,CYP2R1,DPP4,EP300,EPA3,ESR1,ETF1,F2,F3,FAP,FAS,FCGR2A,GAD2,GRK2,GTF2F2,HASPIN,HCK,HLA,DRB1,HNRNPA2B1,HSP90AB1,IFNG,IGF1R,IMPDH1,ITGB3,KLK1,KMT5A,LRBA,MAGEA4,MAGI2,MSH2,NCOA3,NOTCH1,NT5C3A,NUP214,PA2G4,PDHA1,PDK3,PGC,POT1,PRKCB,PTK2B,PTPRE,PYGL,RAC1,RARA,RARG,RRM1,SH2B2,SMG5,SMG7,SMTN,SYT13,TAF13,TJP1,TLR4,TXNDC12,UEVLD,VEGFB,WEE1,XIAP,ZEB2 |
| 282 | Incorporation of thymidine                         | DNA Replication, Recombination, and Repair,Nucleic Acid Metabolism,Small Molecule Biochemistry                                   | 1.76E,06 | 7  | ANG,AR,FAS,FN1,HBEGF,IGF1R,THBS2                                                                                                                                                                                                                                                                                                                                                                                                                                                |
| 283 | Stage IIIB,IV recurrent non,small cell lung cancer | Cancer,Organismal Injury and Abnormalities,Respiratory Disease                                                                   | 1.76E,06 | 7  | ALB,ALK,ERBB4,GART,HSP90AB1,IGF1R,RRM1                                                                                                                                                                                                                                                                                                                                                                                                                                          |
| 284 | Hemolysis                                          | Cell Death and Survival,Connective Tissue Disorders,Hematological Disease,Organismal Injury and Abnormalities                    | 1.78E,06 | 11 | ALB,C8A,DPP4,FAS,FCGR2A,G6PD,HBB,HMOX1,IMPDH1,ITPA,NT5C3A                                                                                                                                                                                                                                                                                                                                                                                                                       |
| 285 | Accumulation of lipid                              | Lipid Metabolism,Molecular Transport,Small Molecule Biochemistry                                                                 | 1.80E,06 | 10 | ARF6,ECHS1,FABP7,FAS,HDAC7,HMOX1,NCOA3,PAFAH1B2,PPARG,PSAP                                                                                                                                                                                                                                                                                                                                                                                                                      |
| 286 | Ovarian adenocarcinoma                             | Cancer,Endocrine System Disorders,Organismal Injury and Abnormalities,Reproductive System Disease                                | 1.82E,06 | 60 | ALB,ALK,AR,ARF6,ARHGEF1,ASAP1,B2M,BCR,CA8,CLK1,CSF2RB,CSNK1G1,CSTF2,CTCF,DPP4,EP300,EPHA3,F2,GART,HBEGF,HCK,HNRNPA2B1,HSP90AB1,HTR1A,ITPA,ITSN1,MAGEA4,MAGI2,MAP3K3,MUC1,NBEA,NCOA3,NF2,NOTCH1,NR1I3,NT5C3A,ODC1,PARP3,PC,PDK4,PGC,POU2F1,PPARG,PPP2R1A,PTPRF,PYGL,RBM39,RRM1,RTN4IP1,SFMBT2,SH3YL1,SKP1,SMTN,SYT13,THBS2,TLR4,UTRN,VAV3,WWP1,ZEB2                                                                                                                              |
| 287 | Colony formation                                   | Cellular Growth and Proliferation                                                                                                | 1.86E,06 | 27 | ALK,AR,BTK,CSF2RB,CTCF,ERBB4,ESR1,FAS,HCK,HNRNPA2B1,IFNG,IGF1R,MSH2,MUC1,NCOA3,NOTCH1,PDHA1,PDK4,PPARG,PPP2R1A,PRKCB,RARG,SEMA4D,SFN,STK4,VEGFB,XIAP                                                                                                                                                                                                                                                                                                                            |
| 288 | Cell cycle progression                             | Cell Cycle                                                                                                                       | 1.88E,06 | 35 | ALK,AR,BTRC,CAMK4,CDK5R1,EP300,ESR1,F2,FAS,GRK2,HASPIN,HBEGF,HMOX1,IFNG,IGF1R,KIF11,MA TK,NAE1,NDC80,NF2,NOTCH1,PPARG,PPP2R1A,PRKCB,RAC1,RARA,RBBP6,RRM1,RUVBL1,SFN,TLR4,TRIM21,WEE1,XIAP,XRCC6                                                                                                                                                                                                                                                                                 |



|     |                                            |                                                                                                   |          |    |                                                                                                                                                                                                                                                                                                                                                                |
|-----|--------------------------------------------|---------------------------------------------------------------------------------------------------|----------|----|----------------------------------------------------------------------------------------------------------------------------------------------------------------------------------------------------------------------------------------------------------------------------------------------------------------------------------------------------------------|
| 289 | Hereditary connective tissue disorder      | Connective Tissue Disorders,Hereditary Disorder,Organismal Injury and Abnormalities               | 1.89E,06 | 34 | ADH1C,ALB,B3GAT3,BMP1,C1R,CANT1,CLCN5,CYP2R1,EP300,ESR1,FLNB,FN1,GC,GGPS1,HBB,HNRNPA2B1,IFNGR1,IMPDH1,KIF11,KYNU,MMP1,MMP2,MTAP,MUC1,MYBPC1,NOTCH1,PEX5,PPARG,PTPRF,PUS10,RARG,RRM1,THBS2,ZNF462                                                                                                                                                               |
| 290 | Cell movement of leukemia cell lines       | Cellular Movement                                                                                 | 1.92E,06 | 13 | ARHGEF1,F2,FLNB,FN1,GC,MATK,NOTCH1,PPARG,PRKCB,PTK2B,RAC1,WARS1,YARS1                                                                                                                                                                                                                                                                                          |
| 291 | Fatty acid metabolism                      | Lipid Metabolism,Small Molecule Biochemistry                                                      | 1.97E,06 | 22 | ACACB,ACADSB,ALB,ALOX12,CD74,CERT1,CHKA,CYP2E1,ECHS1,F2,FABP3,FAS,FCGR2A,FN1,G6PD,IFNG,ITGB3,MECR,MSN,PDK4,PPARG,PSAP                                                                                                                                                                                                                                          |
| 292 | Formation of colorectal cancer cell lines  | Cellular Development,Cellular Growth and Proliferation                                            | 1.98E,06 | 8  | FN1,IFNG,NOTCH1,PDK4,PPP2R1A,RARG,VEGFB,XIAP                                                                                                                                                                                                                                                                                                                   |
| 293 | Cell proliferation of carcinoma cell lines | Cellular Development,Cellular Growth and Proliferation                                            | 2.01E,06 | 29 | AASDHPPT,ALK,AR,CDK5R1,CSTF2,DAPK2,ECHS1,EP300,F3,FAS,FHIT,HK2,HMOX1,HNRNPA2B1,IFNG,IGF1R,MMP1,MUC1,NCOA3,NOTCH1,PDK4,PPARG,PRKCB,PTK2B,PTPRF,RAC1,S100A6,STK4,YY1                                                                                                                                                                                             |
| 294 | Apoptosis of lymphoma cell lines           | Cell Death and Survival                                                                           | 2.04E,06 | 13 | ALB,ALK,BTK,FAS,FN1,HCK,IFNG,IGF1R,MUC1,NOTCH1,PPARG,RAC1,XIAP                                                                                                                                                                                                                                                                                                 |
| 295 | Metastatic cervical neoplasm               | Cancer,Organismal Injury and Abnormalities,Reproductive System Disease                            | 2.07E,06 | 7  | ALK,AOC3,F3,GAD2,GART,HSP90AB1,RRM1                                                                                                                                                                                                                                                                                                                            |
| 296 | Cholangiocarcinoma                         | Cancer,Gastrointestinal Disease,Hepatic System Disease,Organismal Injury and Abnormalities        | 2.07E,06 | 11 | ACY1,ADH1C,ALB,ALK,FAP,GC,HPD,HSP90AB1,MMP2,PGK1,RRM1                                                                                                                                                                                                                                                                                                          |
| 297 | Recurrent pelvic tumor                     | Cancer,Organismal Injury and Abnormalities                                                        | 2.22E,06 | 9  | ALK,AR,CYP17A1,ESR1,F3,GART,HSP90AB1,PARP3,RRM1                                                                                                                                                                                                                                                                                                                |
| 298 | Ovarian carcinoma                          | Cancer,Endocrine System Disorders,Organismal Injury and Abnormalities,Reproductive System Disease | 2.22E,06 | 62 | ALB,ALK,AR,ARF6,ARHGEF1,ASAP1,B2M,BCR,CA8,CLK1,CSF2RB,CSNK1G1,CSTF2,CTCF,DPP4,EP300,EPHA3,ESR1,F2,GART,HBEGF,HCK,HNRNPA2B1,HSP90AB1,HTR1A,IFNGR1,ITPA,ITSN1,MAGEA4,MAGI2,MAP3K3,MUC1,NBEA,NCOA3,NF2,NOTCH1,NR1I3,NT5C3A,ODC1,PARP3,PC,PDK4,PGC,POU2F1,PPARG,PPP2R1A,PTPRF,PYGL,RBM39,RRM1,RTN4IP1,SFMBT2,SH3YL1,SKP1,SMTN,SYT13,THBS2,TLR4,UTRN,VAV3,WWP1,ZEB2 |
| 299 | Autophosphorylation of protein             | Post,Translational Modification                                                                   | 2.23E,06 | 11 | ALK,DAPK2,ERBB4,HCK,IGF1R,MAP3K3,OXSR1,PTK2B,SLK,STK16,STK4                                                                                                                                                                                                                                                                                                    |
| 300 | Cell death of epithelial cell lines        | Cell Death and Survival,Organismal Injury and Abnormalities                                       | 2.41E,06 | 18 | AR,ATXN3,F2,FAS,GRK2,HK2,IFNG,IGF1R,NDUFAB1,NF2,PEX5,PPARG,PRKCB,STK4,TNFAIP8L2,XIAP,YWHAQ,YY1                                                                                                                                                                                                                                                                 |
| 301 | Stage IV non,squamous lung carcinoma       | Cancer,Organismal Injury and Abnormalities,Respiratory Disease                                    | 2.45E,06 | 9  | ALB,ALK,ERBB4,GART,HSP90AB1,IGF1R,PARP3,PTK2B,RRM1                                                                                                                                                                                                                                                                                                             |
| 302 | Cell death of lymphoma cell lines          | Cell Death and Survival                                                                           | 2.45E,06 | 14 | ALB,ALK,BTK,FAS,FN1,HCK,IFNG,IGF1R,MUC1,NOTCH1,PPARG,PRKCB,RAC1,XIAP                                                                                                                                                                                                                                                                                           |
| 303 | Stage I,IV non,small cell lung cancer      | Cancer,Organismal Injury and Abnormalities,Respiratory Disease                                    | 2.47E,06 | 12 | ALB,ALK,B2M,ERBB4,FN1,GART,HSP90AB1,IGF1R,PARP3,PGC,PTK2B,RRM1                                                                                                                                                                                                                                                                                                 |
| 304 | Nonsquamous non,small cell lung carcinoma  | Cancer,Organismal Injury and                                                                      | 2.55E,06 | 72 | ADH1C,ADH7,ALB,ALK,ALOX12,AR,B2M,BTK,CD1A,CERT1,CSNK1G2,CTCF,DGKA,DOK2,EP300,EPHA3,ERBB4,ESR1,F3,FN1,GAD2,GART,GRK6,HASPIN,HCK,HMGB3,HPD,HSD17B4,HSP90AB1,HTR1A,IGF1R,IT                                                                                                                                                                                       |

|     |                                                            |                                                                        |          |     |                                                                                                                                                                                                                                                                                                                                                                                                                                                                                                                                                                                                                                                                                                                                                                                                                                                                                                                                                                                                                                                                  |
|-----|------------------------------------------------------------|------------------------------------------------------------------------|----------|-----|------------------------------------------------------------------------------------------------------------------------------------------------------------------------------------------------------------------------------------------------------------------------------------------------------------------------------------------------------------------------------------------------------------------------------------------------------------------------------------------------------------------------------------------------------------------------------------------------------------------------------------------------------------------------------------------------------------------------------------------------------------------------------------------------------------------------------------------------------------------------------------------------------------------------------------------------------------------------------------------------------------------------------------------------------------------|
|     |                                                            | Abnormalities,Respiratory Disease                                      |          |     | PKC,KIF11,KYNU,LRBA,MAGEA4,MAGI2,MAPK6,MATK,MMP1,MSH2,MSN,MUC1,NBEA,NDC80,NMT1,NOTCH1,NT5C3A,OAT,OXSR1,PAH,PARP3,PATJ,PKD4,PIP4K2C,PPP2R1A,PRKCB,PTK2B,PTPRE,PYGL,RARA,RRM1,SEMA4D,SERPINA5,SFN,SLK,SMG7,STK4,TLR4,TTR,ZCWPW1,ZNF292                                                                                                                                                                                                                                                                                                                                                                                                                                                                                                                                                                                                                                                                                                                                                                                                                             |
| 305 | Breast or colorectal cancer                                | Cancer,Organismal Injury and Abnormalities                             | 2.56E,06 | 179 | ACACB,ACADVL,ADH7,ALB,ALK,ANG,AOC3,APEX1,APPL1,AR,ARHGAP5,ARHGEF1,B2M,BCR,BMP1,BPI,BTK,C1R,CAMK4,CANT1,CDK5R1,CERT1,CLK1,CSDE1,CSF2RB,CSNK1G1,CSNK1G2,CSTF2,CTCF,CUL1,CYP17A1,CYP2E1,CYP7A1,DAPK2,DCXR,DDFA,DGKA,DHPS,DOK2,DPP4,DSG2,ECHS1,EP300,EPHA3,ERBB4,ESR1,EXOSC9,F2,F3,FABP7,FAP,FAS,FCGR2A,FHIT,FLNB,FN1,G6PD,GAD2,GALNT10,GART,GGPS1,GRK2,GRK6,HASPIN,HAT1,HBB,HBEGF,HCK,HDAC7,HIBCH,HLA,DRB1,HMGB3,HMGCS1,HMOX1,HNRNPA2B1,HSP90AB1,HTR1A,IDE,IFNG,IFNGR1,IGF1R,IMPDH1,IQUB,ITGB3,ITPKC,ITSN1,KIF11,KMT5A,LRBA,MAGEA4,MAGI2,MAP3K3,MAPK6,MARF1,MARK1,MATK,MMP1,MMP2,MSH2,MSN,MTAP,MUC1,MYBPC3,NAE1,NBEA,NCOA3,NDC80,NF2,NFATC1,NMT1,NOTCH1,NT5C3A,NUP214,ODC1,OXSR1,PAFAH1B2,PANK1,PAPSS1,PARP3,PATJ,PC,PCYT2,PK3,PK4,PEX5,PGK1,PHF24,POU2F1,PPARG,PPP2R1A,PRKCB,PTK2B,PTPRE,PTPRF,PUS10,PYGL,RAC1,RARA,RARG,RBBP6,RBM39,RND1,RRM1,RUVBL1,S100A6,SART3,SEMA4D,SENP2,SERPINA5,SFMBT2,SLC5A1,SLK,SMAP1,SMG5,SMG7,SMTN,SMURF2,SNX1,SPEF1,STARD13,STK4,SYT13,THBS2,TLR4,TTR,UEVLD,USP19,UTRN,VAV3,VEGFB,WEE1,WHRN,XRCC6,YWHAQ,YY1,ZEB2,ZFP28,ZNF292,ZNF462 |
| 306 | Benign lesion                                              | Organismal Injury and Abnormalities                                    | 2.57E,06 | 38  | ALK,AR,BCR,CLCN5,CSF2RB,CYP17A1,EP300,ERBB4,ESR1,F2,FABP3,FAS,FN1,GGPS1,HDAC7,HSD17B10,HSP90AB1,IGF1R,IMPDH1,MDH1,MMP1,MMP2,MSH2,MSN,MUC1,NOTCH1,ODC1,PKD4,PPARG,PRKCB,RARA,RRM1,RUVBL1,S100A6,TAF13,UTRN,WEE1,ZEB2                                                                                                                                                                                                                                                                                                                                                                                                                                                                                                                                                                                                                                                                                                                                                                                                                                              |
| 307 | Metastatic malignant neoplasm of prostate                  | Cancer,Organismal Injury and Abnormalities,Reproductive System Disease | 2.58E,06 | 11  | AR,CYP17A1,ESR1,GGPS1,HSP90AB1,MMP2,MSH2,PARP3,PPP2R1A,RARG,RRM1                                                                                                                                                                                                                                                                                                                                                                                                                                                                                                                                                                                                                                                                                                                                                                                                                                                                                                                                                                                                 |
| 308 | Colony formation of cells                                  | Cellular Development,Cellular Growth and Proliferation                 | 2.62E,06 | 25  | ALK,AR,CTCF,ERBB4,ESR1,FAS,HCK,HNRNPA2B1,IFNG,IGF1R,MSH2,MUC1,NCOA3,NOTCH1,PDHA1,PK4,PPARG,PPP2R1A,PRKCB,RARG,SEMA4D,SFN,STK4,VEGFB,XIAP                                                                                                                                                                                                                                                                                                                                                                                                                                                                                                                                                                                                                                                                                                                                                                                                                                                                                                                         |
| 309 | Stage IV advanced non-small cell lung carcinoma            | Cancer,Organismal Injury and Abnormalities,Respiratory Disease         | 2.70E,06 | 9   | ALB,ALK,ERBB4,GART,HSP90AB1,IGF1R,PARP3,PTK2B,RRM1                                                                                                                                                                                                                                                                                                                                                                                                                                                                                                                                                                                                                                                                                                                                                                                                                                                                                                                                                                                                               |
| 310 | HER2 negative progesterone receptor negative breast cancer | Cancer,Organismal Injury and Abnormalities,Reproductive System Disease | 2.72E,06 | 14  | AR,CERT1,ERBB4,ESR1,FAS,HCK,HSP90AB1,MAGEA4,MMP2,MUC1,PARP3,PPARG,RRM1,WEE1                                                                                                                                                                                                                                                                                                                                                                                                                                                                                                                                                                                                                                                                                                                                                                                                                                                                                                                                                                                      |
| 311 | Cell viability of lung cancer cell lines                   | Cell Death and Survival                                                | 2.73E,06 | 13  | ALK,FHIT,FN1,HBEGF,HCK,HK2,HMOX1,IGF1R,KIF11,MSH2,NOTCH1,PTK2B,RRM1                                                                                                                                                                                                                                                                                                                                                                                                                                                                                                                                                                                                                                                                                                                                                                                                                                                                                                                                                                                              |
| 312 | Repair of DNA                                              | DNA Replication, Recombination, and Repair                             | 2.79E,06 | 20  | APEX1,ATXN3,BTRC,EP300,G6PD,HAT1,HMOX1,IFNG,IGF1R,MSH2,MYSM1,NAE1,PARP3,RAC1,RARA,RP A3,RRM1,USP19,WEE1,XRCC6                                                                                                                                                                                                                                                                                                                                                                                                                                                                                                                                                                                                                                                                                                                                                                                                                                                                                                                                                    |
| 313 | Remodeling of actin cytoskeleton                           | Cellular Assembly and Organization                                     | 2.80E,06 | 6   | ARHGEF1,F2,MSN,PTK2B,RAC1,TLR4                                                                                                                                                                                                                                                                                                                                                                                                                                                                                                                                                                                                                                                                                                                                                                                                                                                                                                                                                                                                                                   |
| 314 | Stage IIIB,IV nonsquamous non-small cell lung carcinoma    | Cancer,Organismal Injury and Abnormalities,Respiratory Disease         | 2.85E,06 | 8   | ALB,ALK,ERBB4,GART,HSP90AB1,IGF1R,PARP3,RRM1                                                                                                                                                                                                                                                                                                                                                                                                                                                                                                                                                                                                                                                                                                                                                                                                                                                                                                                                                                                                                     |
| 315 | Astrocytoma                                                | Cancer,Neurological Disease,Organismal Injury and Abnormalities        | 2.86E,06 | 146 | ACADVL,ACVR2B,ADH7,ALB,ALK,ALOX12,AMY1C (includes others),APEX1,APPL1,ARHGAP5,ARHGEF1,ASAP1,ATP7B,ATXN3,B3GAT2,BMP1,BPI,C1R,C8A,CLCN5,CSD E1,CSF2RB,CSNK1G2,CSTF2,CTCF,CUL1,CYP2E1,DGKA,DOK2,DPP4,DSG2,EP300,EPHA3,EP300,EPS8L2,ERBB4,ESR1,F2,FABP7,FAS,FLNB,FN1,G6PD,GAD2,GALNT10,GART,GRK2,GRK6,GTF2I,HADH,HASPIN,HDX,HIBC                                                                                                                                                                                                                                                                                                                                                                                                                                                                                                                                                                                                                                                                                                                                     |

|     |                                             |                                                                                         |          |     |                                                                                                                                                                                                                                                                                                                                                                                                                                                                                                                                                                                                                                                                                                                                                                                                                                                                                                                                                                                                                                                                                                                             |
|-----|---------------------------------------------|-----------------------------------------------------------------------------------------|----------|-----|-----------------------------------------------------------------------------------------------------------------------------------------------------------------------------------------------------------------------------------------------------------------------------------------------------------------------------------------------------------------------------------------------------------------------------------------------------------------------------------------------------------------------------------------------------------------------------------------------------------------------------------------------------------------------------------------------------------------------------------------------------------------------------------------------------------------------------------------------------------------------------------------------------------------------------------------------------------------------------------------------------------------------------------------------------------------------------------------------------------------------------|
|     |                                             |                                                                                         |          |     | H,HLA,DRB1,HMBOX1,HMGCS1,HMOX1,HNRNPA2B1,HSD17B10,HSP90AB1,IDE,IFNG,IFNGR1,IGF1R,ITGB3,ITSN1,KMT5A,KYNU,LRBA,MAGI2,MAP3K3,MARF1,MATK,MSH2,MSN,MTAP,MUC1,MYBPC3,NBEA,NCBP1,NCOA3,NF2,NFATC1,NMT1,NOTCH1,NSUN5,NUP214,ODC1,OXSR1,PA2G4,PAFAH1B2,PAH,PANK1,PAPSS1,PARN,PATJ,PC,PCYT2,PDHA1,PGK1,POU2F1,PPARG,PPP2R1A,PRKCB,PSAP,PTK2B,PUS10,PYGL,RAC1,RARA,RARG,RBBP6,RBP5,RRM1,RTN4IP1,SART3,SEMA4D,SENP2,SERPINA5,SFMBT2,SH2B2,SH3YL1,SLC5A1,SMURF2,SNX1,STARD13,SUB1,TAF13,THBS2,TJP1,TLR4,TFNFIIP8L2,USP19,UTRN,VAV3,VPS26A,WEE1,WHRN,YWHAH,YWHAQ,ZBTB43,ZCWPW1,ZEB2,ZFP28,ZIC3,ZNF292,ZNF462                                                                                                                                                                                                                                                                                                                                                                                                                                                                                                                              |
| 316 | Cell movement of leukocytes                 | Cellular Movement,Hematological System Development and Function,Immune Cell Trafficking | 2.99E,06 | 20  | ALB,AOC3,ARHGEF1,CD74,DAPK2,DPP4,F2,FAS,FN1,IFNG,ITGB3,MSN,PPARG,PRKCB,PTK2B,RAC1,SEMA4D,STK4,TLR4,YARS1                                                                                                                                                                                                                                                                                                                                                                                                                                                                                                                                                                                                                                                                                                                                                                                                                                                                                                                                                                                                                    |
| 317 | Anoikis                                     | Cell Death and Survival                                                                 | 2.99E,06 | 10  | DAPK2,FAS,FN1,IGF1R,ITGB3,NCOA3,NOTCH1,PKD4,SNX1,XIAP                                                                                                                                                                                                                                                                                                                                                                                                                                                                                                                                                                                                                                                                                                                                                                                                                                                                                                                                                                                                                                                                       |
| 318 | Neoplasia of lymphoid organ                 | Cancer,Immunological Disease,Organismal Injury and Abnormalities                        | 3.02E,06 | 14  | BTK,EP300,ERBB4,ESR1,GART,GTF2I,HSP90AB1,IGF1R,MMP2,NOTCH1,NT5C3A,RRM1,TXNDC12,XIAP                                                                                                                                                                                                                                                                                                                                                                                                                                                                                                                                                                                                                                                                                                                                                                                                                                                                                                                                                                                                                                         |
| 319 | Leukocyte migration                         | Cellular Movement,Immune Cell Trafficking                                               | 3.12E,06 | 24  | ALB,AOC3,ARHGEF1,CD74,DAPK2,DOK2,DPP4,F2,FAS,FN1,HMOX1,IFNG,ITGB3,MMP1,MSN,PA2G4,PPARG,PRKCB,PTK2B,RAC1,SEMA4D,STK4,TLR4,YARS1                                                                                                                                                                                                                                                                                                                                                                                                                                                                                                                                                                                                                                                                                                                                                                                                                                                                                                                                                                                              |
| 320 | Psoriasis                                   | Dermatological Diseases and Conditions,Organismal Injury and Abnormalities              | 3.33E,06 | 28  | ACP3,ATXN3,CDK5R1,CYP2E1,DPP4,ETF1,FABP7,FCGR2A,FN1,HBB,HMOX1,IFNG,IFNGR1,KLK1,KYNU,MAPK6,MMP1,MMP2,ODC1,PPARG,PRKCB,PSAP,RARA,RARG,SFN,SUB1,TLR4,YWHAQ                                                                                                                                                                                                                                                                                                                                                                                                                                                                                                                                                                                                                                                                                                                                                                                                                                                                                                                                                                     |
| 321 | Glioma                                      | Cancer,Neurological Disease,Organismal Injury and Abnormalities                         | 3.33E,06 | 181 | ACACB,ACADSB,ACADVL,ACVR2B,ADH7,ALB,ALK,ALOX12,AMY1C (includes others),AOC3,APEX1,APPL1,ARHGAP5,ARHGEF1,ASAP1,ATP7B,ATXN3,B3GAT2,BCR,BMP1,BPI,C1R,C8A,CLCN5,CRYM,CSDE1,CSF2RB,CSNK1G1,CSNK1G2,CSTF2,CTCF,CUL1,CYP2E1,DAPK2,DCXR,DGKA,DOK2,DPP4,DSG2,EP300,EPAH3,EP8L2,ERBB4,ESR1,F2,FABP7,FAS,FCGR2A,FLNB,FN1,G6PD,GAD2,GALNT10,GART,GRK2,GRK6,GTF2I,HADH,HASPIN,HAT1,HBEGF,HDX,HIBCH,HK2,HLA,DRB1,HMBOX1,HMGB3,HMGCS1,HMOX1,HNRNPA2B1,HSD17B10,HSD17B4,HSP90AB1,IDE,IFNG,IFNGR1,IGF1R,ITGB3,ITPK1,ITSN1,KMT5A,KYNU,LRBA,MAGEA4,MAGI2,MAP3K3,MARF1,MATK,MMP2,MSH2,MSN,MTAP,MUC1,MYBPC1,MYBPC3,NBEA,NCBP1,NCOA3,NF2,NFATC1,NME3,NMT1,NOTCH1,NR1I3,NSUN5,NUP214,ODC1,OXSR1,PA2G4,PAFAH1B2,PAH,PANK1,PAPSS1,PARN,PATJ,PC,PCYT2,PDHA1,PKD4,PGC,PGK1,PHF24,PIP4K2C,POT1,POU2F1,PPARG,PPP2R1A,PRKCB,PSAP,PTK2B,PTPRE,PTPRF,PUS10,PYGL,RAC1,RARA,RARG,RBBP6,RBM39,RBP5,RGS6,RRM1,RTN4IP1,SART3,SEMA4D,SENP2,SERPINA5,SFMBT2,SH2B2,SH3YL1,SLC5A1,SLK,SMG5,SMURF2,SNX1,STARD13,SUB1,TAF13,THBS2,TIMM9,TJP1,TLR4,TFNFIIP8L2,USP19,UTRN,VAV3,VEGFB,VPS26A,WEE1,WHRN,XIAP,XRCC6,YWHAH,YWHAQ,ZBTB43,ZCWPW1,ZEB2,ZFP28,ZIC3,ZNF292,ZNF462 |
| 322 | Familial encephalopathy                     | Hereditary Disorder,Neurological Disease,Organismal Injury and Abnormalities            | 3.34E,06 | 58  | ADH1C,ALB,ANG,ARF6,ARHGEF1,ATP7B,ATXN3,CA8,CDK5R1,CERT1,CRYM,CTCF,CYP7A1,ECHS1,EP300,ERBB4,ESR1,EXOSC9,F3,FAS,FCGR2A,G6PD,HADH,HMBOX1,HMOX1,HNRNPA2B1,HSD17B10,HTR1A,IFNG,IFNGR1,ITPA,MECR,MMP1,MSH2,NBEA,NDUFAB1,NF2,NR1I3,NUP214,PCYT2,PDHA1,PGK1,PPARG,PPP2R1A,PRKCB,PSAP,PTK2B,PTPRE,RAC1,RTN4IP1,SMTN,SUB1,TAF13,XIAP,XRCC6,ZEB2,ZIC3,ZNF292                                                                                                                                                                                                                                                                                                                                                                                                                                                                                                                                                                                                                                                                                                                                                                           |
| 323 | Proliferation of prostate cancer cell lines | Cellular Development,Cellular Growth and Proliferation                                  | 3.39E,06 | 21  | ACP3,AR,CD74,EP300,F2,HBEGF,HMOX1,IFNG,IGF1R,MMP2,NCOA3,NOTCH1,PA2G4,PKD4,PPARG,PPP2R1A,RAC1,RARG,STK4,VAV3,YWHAQ                                                                                                                                                                                                                                                                                                                                                                                                                                                                                                                                                                                                                                                                                                                                                                                                                                                                                                                                                                                                           |
| 324 | Adhesion of peripheral blood leukocytes     | Cell,To,Cell Signaling and Interaction,Hematological System Development                 | 3.43E,06 | 6   | F2,F3,IFNG,PPARG,PTK2B,RAC1                                                                                                                                                                                                                                                                                                                                                                                                                                                                                                                                                                                                                                                                                                                                                                                                                                                                                                                                                                                                                                                                                                 |

|     |                                                   |                                                                                         |          |     |                                                                                                                                                                                                                                                                                                                                                                                                                                                                                                                                                                                                                                                                                            |
|-----|---------------------------------------------------|-----------------------------------------------------------------------------------------|----------|-----|--------------------------------------------------------------------------------------------------------------------------------------------------------------------------------------------------------------------------------------------------------------------------------------------------------------------------------------------------------------------------------------------------------------------------------------------------------------------------------------------------------------------------------------------------------------------------------------------------------------------------------------------------------------------------------------------|
|     |                                                   | and Function,Immune Cell Trafficking                                                    |          |     |                                                                                                                                                                                                                                                                                                                                                                                                                                                                                                                                                                                                                                                                                            |
| 325 | Progressive recurrent neoplasm                    | Cancer,Organismal Injury and Abnormalities,Tumor Morphology                             | 3.52E,06 | 10  | ALK,ERBB4,ESR1,F3,GART,HSP90AB1,IGF1R,PARP3,PTK2B,RRM1                                                                                                                                                                                                                                                                                                                                                                                                                                                                                                                                                                                                                                     |
| 326 | Squamous,cell carcinoma                           | Cancer,Organismal Injury and Abnormalities                                              | 3.58E,06 | 118 | ALB,ALK,ANXA6,AOC3,AR,ARF6,ARHGAP5,ARHGFE1,ASAP1,ATXN3,B2M,BCR,BPI,BTK,BTRC,C8A,CA MK4,CD74,CERT1,CLK1,CSF2RB,CSNK1G1,CTCF,CUL1,CYP2E1,CYP7A1,DGKA,DOK2,DPP4,DSG2,EP300,EPHA3,EP8L2,ERBB4,F3,FAP,FAS,FCGR2A,FHIT,FN1,GALM,GART,GRHPR,HASPIN,HBB,HBEGF,HDX,HL A,DRB1,HNRNPA2B1,HSCB,HSP90AB1,HTR1A,IDE,IFNGR1,IGF1R,IMPDH1,IQUB,ITPKC,KLK1,KMT5A,M AGI2,MAPK6,MATK,MDH1,MECR,MSH2,MSN,MTAP,MUC1,MYBPC1,NCOA3,NDUFAB1,NF2,NFATC1,NO TCH1,NT5C3A,NUP214,OAT,OXSR1,PANK1,PARP3,PATJ,PKD2,PKD4,PGC,PGK1,POT1,POU2F1,PPARG,PPP 2R1A,PSAP,PTK2B,PTPRE,PTPRF,RAC1,RARG,RBBP6,RGS6,RRM1,SEMA4D,SEN2,SERPINA5,SFMBT2,SH 2B2,SLK,SMG7,SMTN,STK4,TJP1,TLR4,TTR,VAV3,WWP1,ZEB2,ZFP28,ZIC3,ZNF292,ZNF462 |
| 327 | Metastasis of primitive neuroectodermal tumor     | Cancer,Neurological Disease,Organismal Injury and Abnormalities                         | 3.79E,06 | 7   | ALK,CSF2RB,ERBB4,FCGR2A,HSP90AB1,RARA,RARG                                                                                                                                                                                                                                                                                                                                                                                                                                                                                                                                                                                                                                                 |
| 328 | Primary carcinoma                                 | Cancer,Organismal Injury and Abnormalities                                              | 4.04E,06 | 13  | CDK5R1,DOK2,ERBB4,ESR1,HSP90AB1,IGF1R,MUC1,NF2,PARP3,PPARG,RAC1,RRM1,VEGFB                                                                                                                                                                                                                                                                                                                                                                                                                                                                                                                                                                                                                 |
| 329 | Hemoglobinopathy                                  | Connective Tissue Disorders,Hematological Disease,Organismal Injury and Abnormalities   | 4.22E,06 | 11  | F3,GGPS1,GRHPR,HBB,HMOX1,IFNG,IMPDH1,KLK1,PTPRE,RRM1,TAF13                                                                                                                                                                                                                                                                                                                                                                                                                                                                                                                                                                                                                                 |
| 330 | Vasculogenesis                                    | Cardiovascular System Development and Function,Organismal Development                   | 4.25E,06 | 24  | ANG,BPI,DGKA,DSG2,F2,F3,FN1,HBEGF,HMOX1,IFNG,ITGB3,KLK1,MMP2,NFATC1,NOTCH1,PATJ,PPARG ,RAC1,STARD13,THBS2,TLR4,VEGFB,YARS1,YY1                                                                                                                                                                                                                                                                                                                                                                                                                                                                                                                                                             |
| 331 | Stage III epithelial cancer                       | Cancer,Organismal Injury and Abnormalities                                              | 4.46E,06 | 10  | ALB,ALK,ERBB4,ESR1,GART,HSP90AB1,IGF1R,MUC1,PARP3,RRM1                                                                                                                                                                                                                                                                                                                                                                                                                                                                                                                                                                                                                                     |
| 332 | Pancreatobiliary tumor                            | Cancer,Gastrointestinal Disease,Organismal Injury and Abnormalities                     | 4.47E,06 | 99  | ACACB,ACAT2,ACY1,ADH1C,ALB,ALK,ALOX12,APPL1,AR,ARHGAP5,ATP7B,BCR,BPI,BTRC,CD74,CDK5 R1,CHKA,CLK1,CRYM,CSDE1,CSF2RB,CSTF2,CTCF,DCTD,DFFA,DOK2,DPP4,DSG2,EP300,EPHA3,EP8L2, ERBB4,ESR1,F2,F3,FAP,FLNB,FN1,GART,GC,GRHPR,GTF2I,HBEGF,HCK,HLA,DRB1,HMGCS1,HPD,HSP90 AB1,IFNGR1,IGF1R,ITSN1,KIF11,LRBA,MAGI2,MARK1,MMP2,MSH2,MUC1,MYBPC1,MYBPC3,NAE1,NBE A,NF2,NFATC1,NOTCH1,NUP214,PA2G4,PARP3,PC,PDHA1,PKD4,PGC,PGK1,POT1,POU2F1,PPP2R1A,PRKC B,RARA,RBBP6,RBM39,RRM1,S100A6,SEC23A,SERPINA5,SFN,SH2B2,SMURF2,TJP1,TLR4,TRIM21,UEVLD ,UTRN,VAV3,VEGFB,WEE1,YY1,ZEB2,ZFP28,ZNF292                                                                                                              |
| 333 | Stage IV metastatic non,small cell lung carcinoma | Cancer,Organismal Injury and Abnormalities,Respiratory Disease                          | 4.50E,06 | 8   | ALK,ERBB4,GART,HSP90AB1,IGF1R,PARP3,PTK2B,RRM1                                                                                                                                                                                                                                                                                                                                                                                                                                                                                                                                                                                                                                             |
| 334 | Non,insulin,dependent diabetes mellitus           | Endocrine System Disorders,Gastrointestinal Disease,Organismal Injury and Abnormalities | 4.51E,06 | 21  | ALB,AR,BPI,CYP2E1,DPP4,ECHS1,ESR1,GGPS1,HK2,HMBOX1,HTR1A,IDE,IGF1R,IMPDH1,KIF11,PPARG,R AC1,SLC5A1,TAF13,THBS2,VEGFB                                                                                                                                                                                                                                                                                                                                                                                                                                                                                                                                                                       |
| 335 | Invasion of breast cancer cell lines              | Cellular Movement                                                                       | 4.62E,06 | 20  | ARF6,ASAP1,DGKA,ESR1,F2,FAS,FN1,HSP90AB1,ITGB3,MATK,MMP1,MMP2,MUC1,PTK2B,RAC1,RUVBL1 ,SMURF2,TJP1,VPS26A,ZEB2                                                                                                                                                                                                                                                                                                                                                                                                                                                                                                                                                                              |
| 336 | Diabetic complication                             | Endocrine System Disorders,Gastrointestinal                                             | 4.62E,06 | 20  | AR,B2M,DPP4,ESR1,F3,FAS,FN1,HBB,IGF1R,IMPDH1,ITGB3,MAGI2,NOTCH1,PKD4,PPARG,PRKCB,SMUR F2,UTRN,VEGFB,ZEB2                                                                                                                                                                                                                                                                                                                                                                                                                                                                                                                                                                                   |

|     |                                     |                                                                                                                                                |          |     |                                                                                                                                                                                                                                                                                                                                                                                                                                                                                                                                                                                                                                                                                                                                                                                                                                                                                                                                                                                                                      |
|-----|-------------------------------------|------------------------------------------------------------------------------------------------------------------------------------------------|----------|-----|----------------------------------------------------------------------------------------------------------------------------------------------------------------------------------------------------------------------------------------------------------------------------------------------------------------------------------------------------------------------------------------------------------------------------------------------------------------------------------------------------------------------------------------------------------------------------------------------------------------------------------------------------------------------------------------------------------------------------------------------------------------------------------------------------------------------------------------------------------------------------------------------------------------------------------------------------------------------------------------------------------------------|
|     |                                     | al Disease, Metabolic Disease, Organismal Injury and Abnormalities                                                                             |          |     |                                                                                                                                                                                                                                                                                                                                                                                                                                                                                                                                                                                                                                                                                                                                                                                                                                                                                                                                                                                                                      |
| 337 | Entry into interphase               | Cell Cycle                                                                                                                                     | 4.75E,06 | 9   | EP300,F2, FN1, HBEGF, HMOX1, IGF1R, NCOA3, TRIM21, WEE1                                                                                                                                                                                                                                                                                                                                                                                                                                                                                                                                                                                                                                                                                                                                                                                                                                                                                                                                                              |
| 338 | Connective tissue tumor             | Cancer, Organismal Injury and Abnormalities                                                                                                    | 4.81E,06 | 52  | ACACB, ALB, ALK, ANG, AR, CSF2RB, CYP7A1, DHPS, ERBB4, ESR1, F2, FABP7, FAP, FN1, GART, GGPS1, HMGCS1, HSD17B4, HSP90AB1, IFNGR1, IGF1R, IMPDH1, KMT5A, MAPK6, MMP1, MMP2, MSH2, NAE1, NBEA, NCBP1, NF2, NOTCH1, PARP3, PDK4, PEX5, PGK1, PHF24, PPARG, PPP2R1A, PRKCB, RARA, RARG, RRM1, SEC23A, SEMA4D, SLK, TJP1, TLR4, UTRN, WWP1, XIAP, ZIC3                                                                                                                                                                                                                                                                                                                                                                                                                                                                                                                                                                                                                                                                    |
| 339 | Adult T, cell non, Hodgkin lymphoma | Cancer, Hematological Disease, Immunological Disease, Organismal Injury and Abnormalities                                                      | 4.83E,06 | 11  | B2M, DPP4, EP300, FAS, FHIT, HNRNPA2B1, IMPDH1, NOTCH1, POT1, PRKCB, RRM1                                                                                                                                                                                                                                                                                                                                                                                                                                                                                                                                                                                                                                                                                                                                                                                                                                                                                                                                            |
| 340 | Liver tumor                         | Cancer, Gastrointestinal Disease, Hepatic System Disease, Organismal Injury and Abnormalities                                                  | 4.88E,06 | 147 | ACACB, ACADSB, ACADVL, ACY1, ALB, ALK, ANG, APEX1, AR, ARHGAP5, ASAP1, ATP7B, ATXN3, B2M, B3GAT2, BCR, BTK, BTRC, C1R, C8A, CANT1, CD1A, CDK5R1, CLCN5, CLK1, CSDE1, CSF2RB, CSNK1G1, CTCF, CUL1, CYP7A1, DGKA, ECHS1, ECI2, EP300, EPHA3, EPS8L2, ERBB4, ERI1, ESR1, EXOSC9, F2, FABP7, FAP, FLNB, FN1, GALNT10, GC, GGPS1, GRHR, GTF2F2, GTF2I, HADH, HBB, HCK, HDAC7, HDX, HIBCH, HK2, HMGB3, HMGCS1, HMOX1, HNRNPA2B1, HPD, HSP90AB1, HTR1A, IDE, IFNG, IFNGR1, IGF1R, IMPDH1, IQUB, KMT5A, KYNU, MAGI2, MAPK6, MARF1, MDH1, MECR, MMP2, MSH2, MSN, MUC1, MYBPC1, MYBPC3, NAE1, NBEA, NCBP1, NCOA3, NF2, NFATC1, NMT1, NOTCH1, NT5C3A, NUP214, PAH, PATJ, PC, PCYT2, PDHA1, PDK3, PDK4, PEX5, PGK1, PHF24, POT1, POU2F1, PPARG, PPP2R1A, PRKCB, PSAP, PTPRE, PTPRF, PYGL, RAC1, RARA, RBBP6, RRM1, SART3, SEC23A, SFMBT2, SLK, SMG7, SMURF2, SNX22, STARD13, SULT1A1, THBS2, TJP1, TNFAIP8L2, TRIM21, UEVLD, USP19, UTRN, VAV3, VEGFB, WEE1, WWP1, XRCC6, YWHAH, YY1, ZBTB43, ZCWPW1, ZEB2, ZIC3, ZNF292, ZNF462 |
| 341 | Uterine cancer                      | Cancer, Organismal Injury and Abnormalities, Reproductive System Disease                                                                       | 5.07E,06 | 139 | AASDHPPT, ACACB, ACADSB, ACBD7, ACY1, ALB, ALK, AOC3, APPL1, AR, ATP7B, B2M, B3GAT2, BCR, BTK, BTRC, C8A, CA8, CD1A, CLCN5, CSDE1, CSF2RB, CSTF2, CTCF, CUL1, CYP7A1, DCTD, DHPS, DMC1, DOK2, DPP4, DTYMK, EP300, EPHA3, ERBB4, ESR1, ETF1, F3, FABP7, FAP, FAS, FCGR2A, FLNB, FN1, G6PD, GAD2, GART, GRHR, GRK2, GTF2I, HBB, HDX, HMBOX1, HMGB3, HMOX1, HPD, HSD17B4, HSP90AB1, HTR1A, IGF1R, IQUB, ITGB3, ITPKC, KIF11, LRBA, MAGEA4, MAGI2, MAP3K3, MAPK6, MARF1, MARK1, MDH1, MEMO1, MMP1, MMP2, MSH2, MSN, MUC1, MYBPC3, MYSM1, NAE1, NBEA, NCBP1, NF2, NFATC1, NMRK1, NMT1, NOTCH1, NT5C3A, NUP214, OAT, PANK1, PARN, PARP3, PATJ, PDK3, PGK1, PPP2R1A, PTPRE, PTPRF, RAC1, RARA, RARG, RBBP6, RBM39, RGS6, RND1, RRM1, RUVBL1, SART3, SENP2, SERPINA5, SF3B6, SH3YL1, SLC5A1, SLK, SMG5, SMTN, SMURF2, SNX1, STK4, SUB1, SULT1A1, SYT13, THBS2, TJP1, TLR4, TRIM21, UEVLD, UTRN, VAV3, WWP1, XIAP, YY1, ZEB2, ZFP28, ZIC3, ZNF292, ZNF462                                                                     |
| 342 | Inflammation of joint               | Connective Tissue Disorders, Inflammatory Disease, Inflammatory Response, Organismal Injury and Abnormalities, Skeletal and Muscular Disorders | 5.08E,06 | 39  | ALB, ALOX12, ANG, AR, ASAP1, B2M, CD1A, CD74, CSF2RB, DPP4, FAS, FCGR2A, FN1, GGPS1, HBB, HCK, HDAC7, HLA, DRB1, HMOX1, IDE, IFNG, IMPDH1, MAP3K3, MMP1, MMP2, MTAP, NFATC1, PGK1, PPARG, PRKCB, PTK2B, PTPRE, RGS6, SF3B6, SMG7, TAF13, TJP1, TLR4, XIAP                                                                                                                                                                                                                                                                                                                                                                                                                                                                                                                                                                                                                                                                                                                                                            |
| 343 | Apoptosis of carcinoma cell lines   | Cell Death and Survival                                                                                                                        | 5.44E,06 | 20  | ALK, AR, DAPK2, EP300, FAS, FHIT, FN1, G6PD, HK2, HMOX1, IFNG, IGF1R, MSH2, NCOA3, NOTCH1, PPARG, RAC1, RRM1, TLR4, XIAP                                                                                                                                                                                                                                                                                                                                                                                                                                                                                                                                                                                                                                                                                                                                                                                                                                                                                             |
| 344 | Cutaneous T, cell lymphoma          | Cancer, Dermatological Diseases and Conditions, Hematological Disease, Immunological Disease, Organismal Injury and Abnormalities              | 5.50E,06 | 12  | CTCF, DPP4, EPHA3, FAS, NOTCH1, ODC1, POT1, PRKCB, RARA, RARG, RRM1, TLR4                                                                                                                                                                                                                                                                                                                                                                                                                                                                                                                                                                                                                                                                                                                                                                                                                                                                                                                                            |

|     |                                      |                                                                                                 |          |     |                                                                                                                                                                                                                                                                                                                                                                                                                                                                                                                                                                                                                                                                                                                                                                                                                                                                                                                 |
|-----|--------------------------------------|-------------------------------------------------------------------------------------------------|----------|-----|-----------------------------------------------------------------------------------------------------------------------------------------------------------------------------------------------------------------------------------------------------------------------------------------------------------------------------------------------------------------------------------------------------------------------------------------------------------------------------------------------------------------------------------------------------------------------------------------------------------------------------------------------------------------------------------------------------------------------------------------------------------------------------------------------------------------------------------------------------------------------------------------------------------------|
| 345 | Stage IIIB cancer                    | Cancer,Organismal Injury and Abnormalities                                                      | 5.61E,06 | 10  | ALB,ALK,ERBB4,ESR1,FN1,GART,GGPS1,HSP90AB1,IGF1R,RRM1                                                                                                                                                                                                                                                                                                                                                                                                                                                                                                                                                                                                                                                                                                                                                                                                                                                           |
| 346 | Bladder carcinoma                    | Cancer,Organismal Injury and Abnormalities,Renal and Urological Disease                         | 5.84E,06 | 51  | ACACB,ALB,ALK,AOC3,AR,ARHGAP5,BCR,BMP1,BTK,CSTF2,CTCF,CUL1,DGKA,DHPS,DOK2,EP300,EPH A3,EP8L2,ERBB4,GRHPR,HNRNPA2B1,HSP90AB1,KMT5A,KYNU,MAGEA4,MAGI2,MARF1,MMP2,MTAP, NCOA3,NF2,NOTCH1,NT5C3A,PA2G4,PAH,PK4,PPARG,PPP2R1A,PRKCB,PTK2B,PTPRF,RARA,RARG,RB BP6,RBM39,RRM1,SLC5A1,TLR4,XIAP,ZCWPW1,ZEB2                                                                                                                                                                                                                                                                                                                                                                                                                                                                                                                                                                                                             |
| 347 | Undifferentiated malignant neoplasm  | Cancer,Organismal Injury and Abnormalities                                                      | 6.01E,06 | 26  | ALK,AMY1C (includes others),AR,DSG2,EPHA3,ERBB4,FN1,GALNT10,GART,GRK2,HASPIN,HSP90AB1,IGF1R,IMPDH1,MMP1,MS H2,PARP3,PDK4,PGK1,PTK2B,RRM1,SLK,STK4,TLR4,YY1,ZEB2                                                                                                                                                                                                                                                                                                                                                                                                                                                                                                                                                                                                                                                                                                                                                 |
| 348 | High grade astrocytoma               | Cancer,Neurological Disease,Organismal Injury and Abnormalities                                 | 6.02E,06 | 144 | ACADVL,ACVR2B,ADH7,ALB,ALK,ALOX12,AMY1C (includes others),APEX1,APPL1,ARHGAP5,ARHGEF1,ASAP1,ATP7B,ATXN3,B3GAT2,BMP1,BPI,C1R,C8A,CLCN5,CSD E1,CSF2RB,CSNK1G2,CSTF2,CTCF,CUL1,CYP2E1,DGKA,DOK2,DPP4,DSG2,EP300,EPHA3,EP8L2,ERBB4,E SR1,F2,FABP7,FAS,FLNB,FN1,G6PD,GAD2,GALNT10,GART,GRK2,GRK6,GTF2I,HADH,HASPIN,HDX,HIB C,H,HLA,DRB1,HMBOX1,HMGCS1,HMOX1,HNRNPA2B1,HSD17B10,HSP90AB1,IDE,IFNG,IFNGR1,IGF1R,ITG B3,ITSN1,KMT5A,KYNU,LRBA,MAGI2,MAP3K3,MARF1,MATK,MSH2,MSN,MTAP,MUC1,MYBPC3,NBEA, NCBP1,NCOA3,NF2,NFATC1,NMT1,NOTCH1,NSUN5,NUP214,ODC1,OXSR1,PA2G4,PAFAH1B2,PAH,PANK1 ,PAPSS1,PARN,PATJ,PC,PCYT2,PDHA1,PGK1,POU2F1,PPARG,PPP2R1A,PRKCB,PSAP,PTK2B,PUS10,PYGL, RAC1,RARA,RARG,RBBP6,RBP5,RRM1,RTN4IP1,SART3,SEMA4D,SEN2,SERPINA5,SFMBT2,SH2B2,SH3 Y L1,SLC5A1,SMURF2,SNX1,STARD13,SUB1,TAF13,THBS2,TJP1,TLR4,TNFAIP8L2,USP19,UTRN,VAV3,VPS2 6A,WEE1,WHRN,ZBTB43,ZCWPW1,ZEB2,ZFP28,ZIC3,ZNF292,ZNF462 |
| 349 | Export of molecule                   | Molecular Transport                                                                             | 6.06E,06 | 14  | ALB,ATP7B,CRYM,FAS,HMOX1,HNRNPA2B1,MSN,NCBP1,NUP214,PPARG,PRKCB,SMG5,SMG7,TTR                                                                                                                                                                                                                                                                                                                                                                                                                                                                                                                                                                                                                                                                                                                                                                                                                                   |
| 350 | Non,traumatic arthropathy            | Connective Tissue Disorders,Organismal Injury and Abnormalities,Skeletal and Muscular Disorders | 6.12E,06 | 37  | ALB,ALOX12,ANG,AR,ASAP1,B2M,CD1A,CD74,CSF2RB,DPP4,FAS,FCGR2A,FN1,GGPS1,HBB,HCK,HDAC7 ,HLA,DRB1,HMOX1,IDE,IFNG,IMPDH1,MMP1,MMP2,MTAP,NFATC1,PGK1,PPARG,PTK2B,PTPRE,RGS6,SF 3B6,SMG7,TAF13,TJP1,TLR4,XIAP                                                                                                                                                                                                                                                                                                                                                                                                                                                                                                                                                                                                                                                                                                         |
| 351 | Unresectable malignant solid tumor   | Cancer,Organismal Injury and Abnormalities                                                      | 6.18E,06 | 12  | ALK,CSF2RB,ERBB4,ESR1,FN1,GART,HSP90AB1,IGF1R,PARP3,PTK2B,RRM1,VEGFB                                                                                                                                                                                                                                                                                                                                                                                                                                                                                                                                                                                                                                                                                                                                                                                                                                            |
| 352 | Peritoneal tumor                     | Cancer,Organismal Injury and Abnormalities                                                      | 6.20E,06 | 9   | ALB,ALK,ESR1,GART,HSP90AB1,IFNGR1,PARP3,RRM1,XIAP                                                                                                                                                                                                                                                                                                                                                                                                                                                                                                                                                                                                                                                                                                                                                                                                                                                               |
| 353 | Outgrowth of cells                   | Cellular Growth and Proliferation                                                               | 6.20E,06 | 9   | AR,ESR1,FN1,IFNG,ITGB3,MMP2,NOTCH1,PSAP,PTK2B                                                                                                                                                                                                                                                                                                                                                                                                                                                                                                                                                                                                                                                                                                                                                                                                                                                                   |
| 354 | Metabolism of nucleotide             | Nucleic Acid Metabolism,Small Molecule Biochemistry                                             | 6.49E,06 | 17  | DCTD,F2,FHIT,G6PD,GRK2,HMOX1,HTR1A,IFNG,IMPDH1,ITPA,KYNU,NMRK1,PAPSS1,PDHA1,PRKCB,SN X1,SULT1A1                                                                                                                                                                                                                                                                                                                                                                                                                                                                                                                                                                                                                                                                                                                                                                                                                 |
| 355 | Immunodeficiency                     | Immunological Disease                                                                           | 6.49E,06 | 19  | ARHGEF1,B2M,BTK,C8A,CA8,CD74,DAPK2,FAS,FCGR2A,G6PD,GRHPR,IFNGR1,LRBA,MSN,PPARG,STK4, TAF13,TLR4,XIAP                                                                                                                                                                                                                                                                                                                                                                                                                                                                                                                                                                                                                                                                                                                                                                                                            |
| 356 | Cell death of carcinoma cell lines   | Cell Death and Survival                                                                         | 6.50E,06 | 22  | ALK,AR,DAPK2,EP300,FABP7,FAS,FHIT,FN1,G6PD,HK2,HMOX1,IFNG,IGF1R,ITGB3,MSH2,NCOA3,NOTCH 1,PPARG,RAC1,RRM1,TLR4,XIAP                                                                                                                                                                                                                                                                                                                                                                                                                                                                                                                                                                                                                                                                                                                                                                                              |
| 357 | Stage IIIA,IV invasive breast cancer | Cancer,Organismal Injury and Abnormalities,Reproduc tive System Disease                         | 6.57E,06 | 7   | ALB,AR,ERBB4,ESR1,HSP90AB1,PARP3,RRM1                                                                                                                                                                                                                                                                                                                                                                                                                                                                                                                                                                                                                                                                                                                                                                                                                                                                           |
| 358 | Brain lesion                         | Neurological Disease,Organismal Injury and Abnormalities                                        | 6.59E,06 | 177 | ACACB,ACADSB,ACADVL,ACVR2B,ACY1,ADH7,ALB,ALK,ALOX12,AMY1C (includes others),AOC3,APEX1,APPL1,ARHGAP5,ARHGEF1,ASAP1,ATP7B,ATXN3,B3GAT2,BCR,BMP1,BPI,C1R,C8A, CLCN5,CRYM,CSDE1,CSF2RB,CSNK1G1,CSNK1G2,CSTF2,CTCF,CUL1,CYP2E1,DAPK2,DCXR,DGKA,DOK 2,DPP4,DSG2,EP300,EPHA3,EP8L2,ERBB4,ESR1,F2,FAS,FCGR2A,FLNB,FN1,G6PD,GAD2,GALNT10,GART, GRK2,GRK6,GTF2I,HADH,HASPIN,HAT1,HDX,HIBCH,HLA,DRB1,HMBOX1,HMGB3,HMGCS1,HMOX1,HN RNPA2B1,HSD17B10,HSD17B4,HSP90AB1,HTR1A,IDE,IFNGR1,IGF1R,IMPDH1,ITGB3,ITPK1,ITSN1,KMT5A                                                                                                                                                                                                                                                                                                                                                                                                 |

|     |                                       |                                                                     |          |     |                                                                                                                                                                                                                                                                                                                                                                                                                                                                                                                                                                                                                                                                                                                                                                                                                                                                                                                                                                                                                                                                                                                                                                                                                                                                                                                                                                                                                                                                                       |
|-----|---------------------------------------|---------------------------------------------------------------------|----------|-----|---------------------------------------------------------------------------------------------------------------------------------------------------------------------------------------------------------------------------------------------------------------------------------------------------------------------------------------------------------------------------------------------------------------------------------------------------------------------------------------------------------------------------------------------------------------------------------------------------------------------------------------------------------------------------------------------------------------------------------------------------------------------------------------------------------------------------------------------------------------------------------------------------------------------------------------------------------------------------------------------------------------------------------------------------------------------------------------------------------------------------------------------------------------------------------------------------------------------------------------------------------------------------------------------------------------------------------------------------------------------------------------------------------------------------------------------------------------------------------------|
|     |                                       |                                                                     |          |     | ,KYN,LRBA,MAGEA4,MAGI2,MAP3K3,MARF1,MATK,MMP2,MSH2,MSN,MTAP,MUC1,MYBPC1,MYBPC3,NBEA,NCBP1,NCOA3,NF2,NFATC1,NME3,NMT1,NOTCH1,NR1I3,NSUN5,NUP214,ODC1,OXSR1,PAFAH1B2,PAH,PANK1,PAPSS1,PARN,PATJ,PC,PCYT2,PDHA1,PDK4,PGC,PGK1,PHF24,PIP4K2C,POT1,POU2F1,PPARG,PPP2R1A,PRKCB,PSAP,PTK2B,PTPRE,PTPRF,PUS10,PYGL,RAC1,RARA,RARG,RBBP6,RBM39,RBP5,RGS6,RRM1,RTN4IP1,SART3,SEMA4D,SENP2,SERPINA5,SFMBT2,SH2B2,SH3YL1,SLC5A1,SLK,SMG5,SMURF2,SNX1,STARD13,SUB1,THBS2,TIMM9,TJP1,TLR4,TNFAIP8L2,USP19,UTRN,VAV3,VEGFB,VPS26A,WEE1,WHRN,XIAP,XRCC6,YWHAQ,ZBTB43,ZCWPW1,ZEB2,ZFP28,ZIC3,ZNF292,ZNF462                                                                                                                                                                                                                                                                                                                                                                                                                                                                                                                                                                                                                                                                                                                                                                                                                                                                                             |
| 359 | Interphase                            | Cell Cycle                                                          | 6.71E,06 | 30  | AASDHPPT,AR,BTRC,CHKA,CUL1,DPP4,EP300,F2,FAS,FHIT,FN1,HBEGF,HMOX1,IFNG,IGF1R,KIF11,MSH2,NAE1,NCOA3,NOTCH1,PPARG,PPP2R1A,RBBP6,RPA3,SART3,SFN,SKP1,TRIM21,WEE1,YWHAQ                                                                                                                                                                                                                                                                                                                                                                                                                                                                                                                                                                                                                                                                                                                                                                                                                                                                                                                                                                                                                                                                                                                                                                                                                                                                                                                   |
| 360 | Digestive system cancer               | Cancer,Gastrointestinal Disease,Organismal Injury and Abnormalities | 7.14E,06 | 251 | ACACB,ACADSB,ACADVL,ACAT2,ACSM2A,ACVR2B,ACY1,ADH1C,ADH7,ALB,ALK,ALOX12,ANG,ANXA6,AOC3,APEX1,APPL1,AR,ARF6,ARHGAP5,ARHGEF1,ASAP1,ATP7B,ATXN3,B2M,B3GAT2,BCR,BMP1,BPI,BTK,BTRC,C1R,C8A,CAMK4,CANT1,CD1A,CD74,CDK5R1,CHKA,CLCN5,CSDE1,CSF2RB,CSNK1G1,CSNK1G2,CSTF2,CTCF,CUL1,CYP17A1,CYP2E1,CYP2R1,CYP7A1,DAPK2,DCXR,DFFA,DGKA,DHPS,DMC1,DOK2,DPP4,DSG2,ECHS1,ECI2,EP300,EPHA3,EPS8L2,ERBB4,ESR1,ETF1,EXOSC9,F2,F3,FAP,BP7,FAP,FAS,FCGR2A,FHIT,FLNB,FN1,G6PD,GAD2,GALM,GALNT10,GART,GC,GGPS1,GRHPR,GRK2,GRK6,GTF2F2,GTF2I,HADH,HASPIN,HBB,HBEGF,HCK,HDAC7,HDX,HIBCH,HK2,HLA,DRB1,HMGB3,HMGCS1,HMOX1,HNRNPA2B1,HPD,HSCB,HSD17B10,HSD17B4,HSP90AB1,HTR1A,IDE,IFNG,IFNGR1,IGF1R,IMPA2,IMPDPH1,IQUB,ITGB3,ITPK1,ITPKC,ITSN1,KIF11,KLK1,KMT5A,KYN,LRBA,MAGEA4,MAGI2,MAP3K3,MAPK6,MARF1,MARK1,MATK,MDH1,MECR,MMP2,MSH2,MSN,MTAP,MUC1,MYBPC1,MYBPC3,NAE1,NBEA,NCBP1,NCOA3,NF2,NFATC1,NMRK1,NMT1,NOTCH1,NSUN5,NT5C3A,NUP214,OAT,ODC1,OXSR1,PA2G4,PAFAH1B2,PAH,PANK1,PAPSS1,PARN,PARP3,PATJ,PC,PCYT2,PDHA1,PDK2,PDK3,PDK4,PEX5,PGC,PGK1,PHF24,POT1,POU2F1,PPARG,PPP2R1A,PRKCB,PSAP,PTK2B,PTPRE,PTPRF,PUS10,PYGL,RAB26,RAC1,RARA,RARG,RBBP6,RBM39,RGS6,RND1,RRM1,RTN4IP1,RUVBL1,S100A6,SART3,SEC23A,SEMA4D,SERPINA5,SF3B6,SFMBT2,SFN,SH2B2,SH3YL1,SKP1,SLC5A1,SLK,SMAP1,SMG5,SMG7,SMTN,SMURF2,SNX1,SPEF1,STARD13,STK16,STK4,SULT1A1,SYT13,TAF13,THBS2,TJP1,TLR4,TNFAIP8L2,TRIM21,TTR,UEVLD,USP19,UTRN,VAV3,VEGFB,VPS26A,WEE1,WHRN,WWP1,XRCC6,YWHAH,YY1,ZBTB43,ZCWPW1,ZEB2,ZFP28,ZIC3,ZNF292,ZNF462 |
| 361 | Large intestine carcinoma             | Cancer,Gastrointestinal Disease,Organismal Injury and Abnormalities | 7.26E,06 | 218 | ACACB,ACADSB,ACADVL,ACSM2A,ACVR2B,ACY1,ADH7,ALB,ALK,ALOX12,ANXA6,AOC3,APEX1,APPL1,AR,ARF6,ARHGAP5,ARHGEF1,ASAP1,ATP7B,ATXN3,B2M,B3GAT2,BCR,BMP1,BPI,BTK,BTRC,C1R,C8A,CAMK4,CANT1,CD1A,CD74,CDK5R1,CHKA,CLCN5,CSDE1,CSF2RB,CSNK1G2,CSTF2,CTCF,CUL1,CYP17A1,CYP2E1,CYP7A1,DAPK2,DCXR,DFFA,DGKA,DHPS,DMC1,DOK2,DPP4,DSG2,ECHS1,EP300,EPHA3,EPS8L2,ERBB4,ESR1,ETF1,EXOSC9,F2,F3,FAP,FAS,FHIT,FLNB,FN1,G6PD,GAD2,GALNT10,GART,GRHPR,GRK2,GRK6,GTF2I,HADH,HASPIN,HCK,HDAC7,HDX,HIBCH,HK2,HLA,DRB1,HMGB3,HMOX1,HNRNPA2B1,HPD,HSCB,HSD17B10,HSD17B4,HSP90AB1,HTR1A,IDE,IFNGR1,IGF1R,IMPA2,IMPDPH1,IQUB,ITGB3,ITPK1,ITPKC,ITSN1,KIF11,KMT5A,KYN,LRBA,MAGEA4,MAGI2,MAP3K3,MAPK6,MARF1,MARK1,MATK,MECR,MMP2,MSH2,MSN,MTAP,MUC1,MYBPC1,MYBPC3,NAE1,NBEA,NCBP1,NCOA3,NF2,NFATC1,NMRK1,NMT1,NOTCH1,NSUN5,NT5C3A,NUP214,OAT,ODC1,OXSR1,PAFAH1B2,PANK1,PARN,PARP3,PATJ,PC,PCYT2,PDHA1,PDK2,PDK3,PDK4,PEX5,PGC,PGK1,PHF24,POT1,POU2F1,PPARG,PPP2R1A,PRKCB,PTK2B,PTPRF,PUS10,PYGL,RAB26,RAC1,RARA,RARG,RBBP6,RBM39,RGS6,RND1,RRM1,RTN4IP1,RUVBL1,SART3,SEC23A,SEMA4D,SERPINA5,SF3B6,SFMBT2,SH2B2,SH3YL1,SKP1,SLC5A1,SLK,SMAP1,SMG5,SMG7,SMTN,SMURF2,SNX1,SPEF1,STARD13,STK16,SYT13,TAF13,THBS2,TJP1,TLR4,TRIM21,UEVLD,USP19,UTRN,VAV3,VEGFB,VPS26A,WHRN,WWP1,XRCC6,YWHAH,YY1,ZBTB43,ZCWPW1,ZEB2,ZFP28,ZIC3,ZNF292,ZNF462                                                                                                                                                                                |
| 362 | Metabolism of reactive oxygen species | Free Radical Scavenging                                             | 7.35E,06 | 18  | ALB,AOC3,CYP2E1,F2,FAS,FCGR2A,G6PD,HBB,HK2,IFNG,ITGB3,ITSN1,MUC1,PDK4,PRKCB,RAC1,S100A6,TLR4                                                                                                                                                                                                                                                                                                                                                                                                                                                                                                                                                                                                                                                                                                                                                                                                                                                                                                                                                                                                                                                                                                                                                                                                                                                                                                                                                                                          |
| 363 | Metastatic progressive tumor          | Cancer,Organismal Injury and Abnormalities,Tumor Morphology         | 7.53E,06 | 10  | ALK,AR,ERBB4,ESR1,GART,HSP90AB1,IGF1R,PTK2B,RRM1,VEGFB                                                                                                                                                                                                                                                                                                                                                                                                                                                                                                                                                                                                                                                                                                                                                                                                                                                                                                                                                                                                                                                                                                                                                                                                                                                                                                                                                                                                                                |

|     |                                                     |                                                                                         |          |     |                                                                                                                                                                                                                                                                                                                                                                                                                                                                                                                                                                                                                                                                                                                                                                                                                                                                                                                                                                                                                                                                                                         |
|-----|-----------------------------------------------------|-----------------------------------------------------------------------------------------|----------|-----|---------------------------------------------------------------------------------------------------------------------------------------------------------------------------------------------------------------------------------------------------------------------------------------------------------------------------------------------------------------------------------------------------------------------------------------------------------------------------------------------------------------------------------------------------------------------------------------------------------------------------------------------------------------------------------------------------------------------------------------------------------------------------------------------------------------------------------------------------------------------------------------------------------------------------------------------------------------------------------------------------------------------------------------------------------------------------------------------------------|
| 364 | Invasive mammary tumor                              | Cancer,Organismal Injury and Abnormalities,Reproductive System Disease                  | 7.67E,06 | 19  | ALB,ALK,AR,CSF2RB,ERBB4,ESR1,FAP,FAS,FN1,HSP90AB1,MMP2,MYBPC3,PARP3,PK4,PTPRE,PTPRF,RBM39,RRM1,YWHAQ                                                                                                                                                                                                                                                                                                                                                                                                                                                                                                                                                                                                                                                                                                                                                                                                                                                                                                                                                                                                    |
| 365 | Cell movement of granulocytes                       | Cellular Movement,Hematological System Development and Function,Immune Cell Trafficking | 7.77E,06 | 12  | ALB,DAPK2,DPP4,FAS,FN1,IFNG,ITGB3,PPARG,PRKCB,RAC1,TLR4,YARS1                                                                                                                                                                                                                                                                                                                                                                                                                                                                                                                                                                                                                                                                                                                                                                                                                                                                                                                                                                                                                                           |
| 366 | Organization of cytoplasm                           | Cellular Assembly and Organization,Cellular Function and Maintenance                    | 8.02E,06 | 36  | AR,ARF6,ASAP1,ATXN3,BTK,CAMK4,CDK5R1,EPHA3,ERBB4,ESR1,F2,F3,FAS,FCGR2A,FHIT,FN1,GRK2,HCK,HSD17B10,IFNG,ITGB3,KIF11,MATK,MSN,NDC80,NF2,PARP3,PRKCB,PTPRF,RAC1,RND1,SEMA4D,SLK,SPEF1,TJP1,TLR4                                                                                                                                                                                                                                                                                                                                                                                                                                                                                                                                                                                                                                                                                                                                                                                                                                                                                                            |
| 367 | Follicular lymphoma                                 | Cancer,Hematological Disease,Immunological Disease,Organismal Injury and Abnormalities  | 8.10E,06 | 10  | B2M,BTK,EP300,FAS,FCGR2A,HSP90AB1,IFNG,NOTCH1,RRM1,XIAP                                                                                                                                                                                                                                                                                                                                                                                                                                                                                                                                                                                                                                                                                                                                                                                                                                                                                                                                                                                                                                                 |
| 368 | Colony formation of tumor cell lines                | Cellular Development,Cellular Growth and Proliferation                                  | 8.30E,06 | 21  | ALK,AR,CTCF,ERBB4,ESR1,HCK,HNRNPA2B1,IFNG,IGF1R,MUC1,NCOA3,NOTCH1,PDHA1,PK4,PPP2R1A,PRKCB,RARG,SFN,STK4,VEGFB,XIAP                                                                                                                                                                                                                                                                                                                                                                                                                                                                                                                                                                                                                                                                                                                                                                                                                                                                                                                                                                                      |
| 369 | Central nervous system cancer                       | Cancer,Neurological Disease,Organismal Injury and Abnormalities                         | 8.38E,06 | 179 | ACACB,ACADSB,ACADVL,ACVR2B,ACY1,ADH7,ALB,ALK,ALOX12,AMY1C (includes others),AOC3,APEX1,APPL1,ARHGAP5,ARHGEF1,ASAP1,ATP7B,ATXN3,B3GAT2,BCR,BMP1,BPI,BTK,C1R,C8A,CLCN5,CRYM,CSDE1,CSF2RB,CSNK1G1,CSNK1G2,CTCF,CUL1,CYP2E1,DAPK2,DCXR,DGKA,DOK2,DPP4,DSG2,EP300,EPHA3,EP8L2,ERBB4,ESR1,F2,FABP7,FAS,FCGR2A,FLNB,FN1,G6PD,GAD2,GALNT10,GART,GRK2,GRK6,GTF2I,HADH,HASPIN,HAT1,HDX,HIBCH,HLA,DRB1,HMBOX1,HMGCS1,HMOX1,HNRNPA2B1,HSD17B10,HSD17B4,HSP90AB1,IDE,IFNG,IFNGR1,IGF1R,ITGB3,ITPK1,ITSN1,KMT5A,KYNU,LRBA,MAGEA4,MAGI2,MAP3K3,MARF1,MATK,MMP2,MSH2,MSN,MTAP,MUC1,MYBPC1,MYBPC3,NAE1,NBEA,NCBP1,NCOA3,NF2,NFATC1,NME3,NMT1,NOTCH1,NR1I3,NSUN5,NUP214,ODC1,OXSR1,PA2G4,PAFAH1B2,PAH,PANK1,PAPSS1,PARN,PATJ,PC,PCYT2,PDHA1,PK4,PGC,PGK1,PHF24,PIP4K2C,POT1,POU2F1,PPARG,PPP2R1A,PRKCB,PSAP,PTK2B,PTPRE,PTPRF,PUS10,PYGL,RAC1,RARA,RARG,RBBP6,RBM39,RBP5,RGS6,RRM1,RTN4IP1,SART3,SEMA4D,SENP2,SERPINA5,SFMBT2,SH2B2,SH3YL1,SLC5A1,SLK,SMG5,SMURF2,SNX1,STARD13,SUB1,TAF13,THBS2,TIMM9,TJP1,TLR4,TNFAIP8L2,USP19,UTRN,VAV3,VEGFB,VP S26A,WEE1,WHRN,XRCC6,YWHAQ,ZBTB43,ZCWPW1,ZEB2,ZFP28,ZIC3,ZNF292,ZNF462 |
| 370 | Growth of malignant tumor                           | Cancer,Organismal Injury and Abnormalities                                              | 8.44E,06 | 13  | AR,BTK,ESR1,FHIT,IFNG,IGF1R,MUC1,NOTCH1,ODC1,PRKCB,PTK2B,RUVBL1,XIAP                                                                                                                                                                                                                                                                                                                                                                                                                                                                                                                                                                                                                                                                                                                                                                                                                                                                                                                                                                                                                                    |
| 371 | Recurrent nonsquamous non-small cell lung carcinoma | Cancer,Organismal Injury and Abnormalities,Respiratory Disease                          | 8.50E,06 | 7   | ALB,ALK,ERBB4,GART,HSP90AB1,IGF1R,RRM1                                                                                                                                                                                                                                                                                                                                                                                                                                                                                                                                                                                                                                                                                                                                                                                                                                                                                                                                                                                                                                                                  |
| 372 | Lung adenocarcinoma                                 | Cancer,Organismal Injury and Abnormalities,Respiratory Disease                          | 8.54E,06 | 70  | ADH1C,ADH7,ALK,ALOX12,AR,B2M,BTK,CD1A,CERT1,CSNK1G2,CTCF,DGKA,DOK2,EP300,EPHA3,ERBB4,ESR1,F3,FN1,GAD2,GART,GRK6,HASPIN,HCK,HMGB3,HPD,HSD17B4,HSP90AB1,HTR1A,IGF1R,ITPKC,KIF11,KYNU,LRBA,MAGEA4,MAGI2,MAPK6,MATK,MMP1,MSH2,MSN,MUC1,NBEA,NDC80,NMT1,NOTCH1,NT5C3A,OAT,OXSR1,PAH,PATJ,PK4,PIP4K2C,PPP2R1A,PRKCB,PTK2B,PTPRE,PYGL,RARA,RRM1,SEMA4D,SERPINA5,SFN,SLK,SMG7,STK4,TLR4,TTR,ZCWPW1,ZNF292                                                                                                                                                                                                                                                                                                                                                                                                                                                                                                                                                                                                                                                                                                       |
| 373 | Stage IV advanced solid tumor                       | Cancer,Organismal Injury and Abnormalities                                              | 8.65E,06 | 11  | ALB,ALK,BTK,ERBB4,ESR1,GART,HSP90AB1,IGF1R,PARP3,PTK2B,RRM1                                                                                                                                                                                                                                                                                                                                                                                                                                                                                                                                                                                                                                                                                                                                                                                                                                                                                                                                                                                                                                             |
| 374 | Recurrent advanced cancer                           | Cancer,Organismal Injury and Abnormalities                                              | 8.71E,06 | 9   | ALB,ALK,AR,ERBB4,ESR1,GART,HSP90AB1,PTK2B,RRM1                                                                                                                                                                                                                                                                                                                                                                                                                                                                                                                                                                                                                                                                                                                                                                                                                                                                                                                                                                                                                                                          |



|     |                                                |                                                                        |          |     |                                                                                                                                                                                                                                                                                                                                                                                                                                                                                                                                                                                                                                                                                                                                                                                                                                                                                                                                                                                                                                                                                                  |
|-----|------------------------------------------------|------------------------------------------------------------------------|----------|-----|--------------------------------------------------------------------------------------------------------------------------------------------------------------------------------------------------------------------------------------------------------------------------------------------------------------------------------------------------------------------------------------------------------------------------------------------------------------------------------------------------------------------------------------------------------------------------------------------------------------------------------------------------------------------------------------------------------------------------------------------------------------------------------------------------------------------------------------------------------------------------------------------------------------------------------------------------------------------------------------------------------------------------------------------------------------------------------------------------|
| 375 | Uterine corpus cancer                          | Cancer,Organismal Injury and Abnormalities,Reproductive System Disease | 9.21E,06 | 11  | AR,CTCF,EP300,EPA3,ERBB4,HSP90AB1,NOTCH1,PPP2R1A,RAC1,RRM1,TLR4                                                                                                                                                                                                                                                                                                                                                                                                                                                                                                                                                                                                                                                                                                                                                                                                                                                                                                                                                                                                                                  |
| 376 | Inflammation of absolute anatomical region     | Inflammatory Response                                                  | 9.25E,06 | 30  | ALB,ALK,ALOX12,AR,CSF2RB,CYP17A1,CYP2E1,DHPS,EP300,ESR1,F2,F3,FAS,FCGR2A,FN1,GAD2,GC,IDE,IFNG,IFNGR1,IGF1R,IMPDH1,ITGB3,MUC1,PPARG,RAC1,RARA,SMURF2,TAF13,TLR4                                                                                                                                                                                                                                                                                                                                                                                                                                                                                                                                                                                                                                                                                                                                                                                                                                                                                                                                   |
| 377 | Locally advanced non,small cell lung carcinoma | Cancer,Organismal Injury and Abnormalities,Respiratory Disease         | 9.35E,06 | 8   | ALK,ERBB4,GART,HSP90AB1,IGF1R,PARP3,PTK2B,RRM1                                                                                                                                                                                                                                                                                                                                                                                                                                                                                                                                                                                                                                                                                                                                                                                                                                                                                                                                                                                                                                                   |
| 378 | Brain tumor                                    | Cancer,Neurological Disease,Organismal Injury and Abnormalities        | 9.37E,06 | 176 | ACACB,ACADSB,ACADVL,ACVR2B,ACY1,ADH7,ALB,ALK,ALOX12,AMY1C (includes others),AOC3,APEX1,APPL1,ARHGAP5,ARHGEF1,ASAP1,ATP7B,ATXN3,B3GAT2,BCR,BMP1,BPI,C1R,C8A,CLCN5,CRYM,CSDE1,CSF2RB,CSNK1G1,CSNK1G2,CSTF2,CTCF,CUL1,CYP2E1,DAPK2,DCXR,DGKA,DOK2,DPP4,DSG2,EP300,EPA3,EP38L2,ERBB4,ESR1,F2,FAS,FCGR2A,FLNB,FN1,G6PD,GAD2,GALNT10,GART,GRK2,GRK6,GT2F2I,HADH,HASPIN,HAT1,HDX,HIBCH,HLA,DRB1,HMBOX1,HMGB3,HMGCS1,HMOX1,HNRNPA2B1,HSD17B10,HSD17B4,HSP90AB1,IDE,IFNGR1,IGF1R,IMPDH1,ITGB3,ITPK1,ITSN1,KMT5A,KYNU,LRBA,MAGEA4,MAGI2,MAP3K3,MARF1,MATK,MMP2,MSH2,MSN,MTAP,MUC1,MYBPC1,MYBPC3,NBEA,NCBP1,NCOA3,NF2,NFATC1,NME3,NMT1,NOTCH1,NR1H3,NSUN5,NUP214,ODC1,OXSRI,PAFAH1B2,PAH,PANK1,PAPSS1,PARN,PATJ,PC,PCYT2,PDHA1,PDK4,PGC,PGK1,PHF24,PIP4K2C,POT1,POU2F1,PPARG,PPP2R1A,PRKCB,PSAP,PTK2B,PTPRE,PTPRF,PUS10,PYGL,RAC1,RARA,RARG,RBBP6,RBM39,RBP5,RGS6,RRM1,RTN4IP1,SART3,SEMA4D,SENP2,SERPINA5,SFMBT2,SH2B2,SH3YL1,SLC5A1,SLK,SMG5,SMURF2,SNX1,STARD13,SUB1,THBS2,TIMM9,TJP1,TLR4,TNFAIP8L2,USP19,UTRN,VAV3,VEGFB,VPS26A,WEE1,WHRN,XIAP,XRCC6,YWHAQ,ZBTB43,ZCWPW1,ZEB2,ZFP28,ZIC3,ZNF292,ZNF462 |
| 379 | Primitive neuroectodermal tumor                | Cancer,Neurological Disease,Organismal Injury and Abnormalities        | 9.79E,06 | 15  | ALK,AR,CSF2RB,CTCF,EP300,ERBB4,FAP,FCGR2A,HSP90AB1,IDE,IGF1R,PGK1,RARA,RARG,UTRN                                                                                                                                                                                                                                                                                                                                                                                                                                                                                                                                                                                                                                                                                                                                                                                                                                                                                                                                                                                                                 |
| 380 | Unresectable advanced cancer                   | Cancer,Organismal Injury and Abnormalities                             | 9.79E,06 | 11  | ALK,ERBB4,ESR1,FN1,GART,HSP90AB1,IGF1R,PARP3,PTK2B,RRM1,VEGFB                                                                                                                                                                                                                                                                                                                                                                                                                                                                                                                                                                                                                                                                                                                                                                                                                                                                                                                                                                                                                                    |
| 381 | Synthesis of reactive oxygen species           | Free Radical Scavenging                                                | 1.01E,05 | 17  | ALB,AOC3,CYP2E1,F2,FAS,FCGR2A,G6PD,HBB,HK2,IFNG,ITGB3,ITSN1,MUC1,PRKCB,RAC1,S100A6,TLR4                                                                                                                                                                                                                                                                                                                                                                                                                                                                                                                                                                                                                                                                                                                                                                                                                                                                                                                                                                                                          |
| 382 | Grade 3,4 tumor                                | Cancer,Organismal Injury and Abnormalities                             | 1.02E,05 | 154 | ACACB,ACADVL,ACVR2B,ADH7,ALB,ALK,ALOX12,AMY1C (includes others),APEX1,APPL1,ARHGAP5,ARHGEF1,ASAP1,ATP7B,ATXN3,B3GAT2,BMP1,BPI,C1R,C8A,CLCN5,CSDE1,CSF2RB,CSNK1G2,CSTF2,CTCF,CUL1,CYP2E1,DAPK2,DCXR,DGKA,DMC1,DOK2,DPP4,DSG2,EP300,EPA3,EP38L2,ERBB4,ESR1,F2,FABP7,FAS,FCGR2A,FLNB,FN1,G6PD,GAD2,GALNT10,GART,GRK2,GRK6,GT2F2I,HADH,HASPIN,HDX,HIBCH,HLA,DRB1,HMBOX1,HMGCS1,HMOX1,HSD17B10,HSD17B4,HSP90AB1,IDE,IFNG,IFNGR1,IGF1R,ITGB3,ITSN1,KMT5A,KYNU,LRBA,MAGI2,MAP3K3,MARF1,MATK,MMP2,MSH2,MSN,MTAP,MUC1,MYBPC3,NBEA,NCBP1,NCOA3,NF2,NFATC1,NME3,NMT1,NOTCH1,NSUN5,NUP214,ODC1,OXSRI,PAFAH1B2,PAH,PANK1,PAPSS1,PARN,PATJ,PC,PCYT2,PDHA1,PGC,PGK1,PHF24,POU2F1,PPARG,PPP2R1A,PSAP,PTK2B,PUS10,PYGL,RARA,RARG,RBBP6,RBM39,RBP5,RGS6,RRM1,RTN4IP1,SART3,SEMA4D,SENP2,SERPINA5,SFMBT2,SH2B2,SH3YL1,SLC5A1,SLK,SMG5,SMURF2,SNX1,STARD13,SUB1,THBS2,TJP1,TLR4,TNFAIP8L2,USP19,UTRN,VAV3,VPS26A,WEE1,WHRN,XRCC6,ZBTB43,ZCWPW1,ZEB2,ZFP28,ZIC3,ZNF292,ZNF462                                                                                                                                         |
| 383 | Cell death of neuroblastoma cell lines         | Cell Death and Survival                                                | 1.08E,05 | 12  | ANG,APPL1,AR,CAMK4,DPP4,FAS,IDE,IFNG,IGF1R,PRKCB,RARG,S100A6                                                                                                                                                                                                                                                                                                                                                                                                                                                                                                                                                                                                                                                                                                                                                                                                                                                                                                                                                                                                                                     |
| 384 | Aggregation of cells                           | Cell,To,Cell Signaling and Interaction                                 | 1.08E,05 | 12  | ALB,ALOX12,BTK,CANT1,DSG2,F2,FCGR2A,HNRNPA2B1,IGF1R,ITGB3,SEMA4D,TLR4                                                                                                                                                                                                                                                                                                                                                                                                                                                                                                                                                                                                                                                                                                                                                                                                                                                                                                                                                                                                                            |
| 385 | Early stage solid tumor                        | Cancer,Organismal Injury and Abnormalities                             | 1.11E,05 | 15  | ALB,ALK,B2M,CSF2RB,ERBB4,ESR1,FN1,GART,GGPS1,HSP90AB1,MUC1,PGC,RARA,RARG,RRM1                                                                                                                                                                                                                                                                                                                                                                                                                                                                                                                                                                                                                                                                                                                                                                                                                                                                                                                                                                                                                    |

|     |                                       |                                                                                        |          |     |                                                                                                                                                                                                                                                                                                                                                                                                                                                                                                                                                                                                                                                                                                                                                                                                                                                                                                                                                                                                                                                                                                                                                                                                                                                                                           |
|-----|---------------------------------------|----------------------------------------------------------------------------------------|----------|-----|-------------------------------------------------------------------------------------------------------------------------------------------------------------------------------------------------------------------------------------------------------------------------------------------------------------------------------------------------------------------------------------------------------------------------------------------------------------------------------------------------------------------------------------------------------------------------------------------------------------------------------------------------------------------------------------------------------------------------------------------------------------------------------------------------------------------------------------------------------------------------------------------------------------------------------------------------------------------------------------------------------------------------------------------------------------------------------------------------------------------------------------------------------------------------------------------------------------------------------------------------------------------------------------------|
| 386 | Inflammation of body cavity           | Inflammatory Response                                                                  | 1.12E,05 | 29  | ALB,ALK,ALOX12,AR,CSF2RB,CYP2E1,DHPS,EP300,ESR1,F2,F3,FAS,FCGR2A,FN1,GAD2,GC,IDE,IFNG,IFNGR1,IGF1R,IMPDH1,ITGB3,MUC1,PPARG,RAC1,RARA,SMURF2,TAF13,TLR4                                                                                                                                                                                                                                                                                                                                                                                                                                                                                                                                                                                                                                                                                                                                                                                                                                                                                                                                                                                                                                                                                                                                    |
| 387 | Stage I non,small cell lung carcinoma | Cancer,Organismal Injury and Abnormalities,Respiratory Disease                         | 1.14E,05 | 8   | ALK,B2M,ERBB4,FN1,GART,HSP90AB1,PGC,RRM1                                                                                                                                                                                                                                                                                                                                                                                                                                                                                                                                                                                                                                                                                                                                                                                                                                                                                                                                                                                                                                                                                                                                                                                                                                                  |
| 388 | Metastatic recurrent cancer           | Cancer,Organismal Injury and Abnormalities                                             | 1.14E,05 | 8   | ALB,AR,CYP17A1,ERBB4,ESR1,GGPS1,HSP90AB1,RRM1                                                                                                                                                                                                                                                                                                                                                                                                                                                                                                                                                                                                                                                                                                                                                                                                                                                                                                                                                                                                                                                                                                                                                                                                                                             |
| 389 | Benign pelvic disease                 | Organismal Injury and Abnormalities,Reproductive System Disease                        | 1.16E,05 | 28  | APEX1,AR,ATP7B,CLCN5,ESR1,FAS,FN1,HSD17B10,HSD17B4,HSP90AB1,IGF1R,ITGB3,MDH1,MMP1,MMP2,MUC1,PKK4,PPARG,PRKCB,RAC1,RRM1,S100A6,TAF13,THBS2,UTRN,WEE1,XRCC6,YWHAH                                                                                                                                                                                                                                                                                                                                                                                                                                                                                                                                                                                                                                                                                                                                                                                                                                                                                                                                                                                                                                                                                                                           |
| 390 | Metabolism of DNA                     | DNA Replication, Recombination, and Repair                                             | 1.19E,05 | 16  | APEX1,CUL1,DFFA,EP300,FAS,IFNG,IGF1R,KMT5A,MSH2,NAE1,PGK1,RBBP6,RPA3,SUB1,WEE1,XRCC6                                                                                                                                                                                                                                                                                                                                                                                                                                                                                                                                                                                                                                                                                                                                                                                                                                                                                                                                                                                                                                                                                                                                                                                                      |
| 391 | Benign Tumors                         | Cancer,Organismal Injury and Abnormalities                                             | 1.22E,05 | 35  | ALK,AR,BCR,CLCN5,CSF2RB,EP300,ERBB4,ESR1,FABP3,FAS,FN1,GGPS1,HDAC7,HSD17B10,HSP90AB1,IGF1R,IMPDH1,MDH1,MMP2,MSH2,MSN,MUC1,NOTCH1,ODC1,PKK4,PPARG,PRKCB,RARA,RRM1,RUVBL1,S100A6,TAF13,UTRN,WEE1,ZEB2                                                                                                                                                                                                                                                                                                                                                                                                                                                                                                                                                                                                                                                                                                                                                                                                                                                                                                                                                                                                                                                                                       |
| 392 | Large intestine adenocarcinoma        | Cancer,Gastrointestinal Disease,Organismal Injury and Abnormalities                    | 1.23E,05 | 216 | ACACB,ACADSB,ACADVL,ACSM2A,ACVR2B,ACY1,ADH7,ALB,ALK,ALOX12,ANXA6,AOC3,APEX1,APPL1,AR,ARF6,ARHGAP5,ARHGEF1,ASAP1,ATP7B,ATXN3,B2M,B3GAT2,BCR,BMP1,BPI,BTK,BTRC,C1R,C8A,CAMK4,CANT1,CD1A,CD74,CDK5R1,CHKA,CLCN5,CSDE1,CSF2RB,CSNK1G2,CSTF2,CTCF,CUL1,CYP17A1,CYP2E1,CYP7A1,DAPK2,DCXR,DFFA,DGKA,DHPS,DMC1,DOK2,DPP4,DSG2,ECHS1,EP300,EPA3,EP8L2,ERBB4,ESR1,ETF1,EXOSC9,F2,F3,FAP,FAS,FHIT,FLNB,FN1,G6PD,GAD2,GALNT10,GART,GRHPR,GRK2,GRK6,GTF2I,HADH,HASPIN,HCK,HDAC7,HDX,HIBCH,HK2,HLA,DRB1,HMGB3,HMOX1,HNRNPA2B1,HPD,HSCB,HSD17B10,HSD17B4,HSP90AB1,HTR1A,IDE,IFNGR1,IGF1R,IMPA2,IMPDH1,IQUB,ITGB3,ITPK1,ITPKC,ITSN1,KIF11,KMT5A,KYNU,LRBA,MAGEA4,MAGI2,MAP3K3,MAPK6,MARF1,MARK1,MATK,MECR,MMP2,MSH2,MSN,MTAP,MUC1,MYBPC1,MYBPC3,NAE1,NBEA,NCBP1,NCOA3,NF2,NFATC1,NMRK1,NMT1,NOTCH1,NSUN5,NT5C3A,NUP214,OAT,ODC1,OXSR1,PAFAH1B2,PANK1,PARN,PARP3,PATJ,PC,PCYT2,PDHA1,PKK2,PKK3,PKK4,PGC,PGK1,PHF24,POT1,POU2F1,PPARG,PPP2R1A,PRKCB,PTK2B,PTPRF,PUS10,PYGL,RAB26,RAC1,RARA,RARG,RBBP6,RBM39,RGS6,RND1,RRM1,RTN4IP1,RUVBL1,SART3,SEC23A,SEMA4D,SERPINA5,SF3B6,SFMBT2,SH2B2,SH3YL1,SKP1,SLC5A1,SLK,SMAP1,SMG5,SMG7,SMTN,SMURF2,SNX1,SPEF1,STARD13,STK16,SYT13,THBS2,TJPI,TLR4,TRIM21,UEVLD,USP19,UTRN,VAV3,VEGFB,VPS26A,WHRN,WWP1,XRCC6,YWHAH,YY1,ZBTB43,ZCWPW1,ZEB2,ZFP28,ZIC3,ZNF292,ZNF462 |
| 393 | Peripheral T,cell lymphoma            | Cancer,Hematological Disease,Immunological Disease,Organismal Injury and Abnormalities | 1.23E,05 | 16  | ALK,C1R,CLK1,EPA3,ERBB4,FN1,GTF2I,HDAC7,HSP90AB1,MMP1,MMP2,NFATC1,NT5C3A,POU2F1,RRM1,TJPI                                                                                                                                                                                                                                                                                                                                                                                                                                                                                                                                                                                                                                                                                                                                                                                                                                                                                                                                                                                                                                                                                                                                                                                                 |
| 394 | Development of tumor cell lines       | Cellular Development,Cellular Growth and Proliferation                                 | 1.24E,05 | 22  | ALK,AR,CTCF,ERBB4,ESR1,FN1,HCK,HNRNPA2B1,IFNG,IGF1R,MUC1,NCOA3,NOTCH1,PDHA1,PKK4,PPP2R1A,PRKCB,RARG,SFN,STK4,VEGFB,XIAP                                                                                                                                                                                                                                                                                                                                                                                                                                                                                                                                                                                                                                                                                                                                                                                                                                                                                                                                                                                                                                                                                                                                                                   |
| 395 | Activation of cells                   | Cell,To,Cell Signaling and Interaction                                                 | 1.24E,05 | 23  | ALB,BPI,BTK,CD1A,DGKA,DPP4,F2,F3,FAS,FCGR2A,FN1,GC,HBEGF,IFNG,ITGB3,MMP1,MMP2,PPARG,PRKCB,PTK2B,SEMA4D,TLR4,VAV3                                                                                                                                                                                                                                                                                                                                                                                                                                                                                                                                                                                                                                                                                                                                                                                                                                                                                                                                                                                                                                                                                                                                                                          |
| 396 | Peritoneal cavity cancer              | Cancer,Organismal Injury and Abnormalities                                             | 1.25E,05 | 8   | ALB,ALK,ESR1,GART,HSP90AB1,IFNGR1,PARP3,RRM1                                                                                                                                                                                                                                                                                                                                                                                                                                                                                                                                                                                                                                                                                                                                                                                                                                                                                                                                                                                                                                                                                                                                                                                                                                              |
| 397 | Development of cytoplasm              | Cellular Assembly and Organization                                                     | 1.27E,05 | 18  | ANG,AR,ARF6,CD74,DGKA,F2,FCGR2A,FHIT,FN1,HCK,ITGB3,NF2,NFATC1,NOTCH1,PTK2B,RAC1,STK4,XIAP                                                                                                                                                                                                                                                                                                                                                                                                                                                                                                                                                                                                                                                                                                                                                                                                                                                                                                                                                                                                                                                                                                                                                                                                 |
| 398 | Digestive organ tumor                 | Cancer,Gastrointestinal Disease,Organismal Injury and Abnormalities                    | 1.29E,05 | 253 | ACACB,ACADSB,ACADVL,ACAT2,ACSM2A,ACVR2B,ACY1,ADH1C,ADH7,ALB,ALK,ALOX12,ANG,ANXA6,AOC3,APEX1,APPL1,AR,ARF6,ARHGAP5,ARHGEF1,ASAP1,ATP7B,ATXN3,B2M,B3GAT2,BCR,BMP1,BPI,BTK,BTRC,C1R,C8A,CAMK4,CANT1,CD1A,CD74,CDK5R1,CHKA,CLCN5,CLK1,CRYM,CSDE1,CSF2RB,CSNK1G1,CSNK1G2,CSTF2,CTCF,CUL1,CYP17A1,CYP2E1,CYP2R1,CYP7A1,DAPK2,DCTD,DCXR,DFFA,DGK                                                                                                                                                                                                                                                                                                                                                                                                                                                                                                                                                                                                                                                                                                                                                                                                                                                                                                                                                 |

|     |                                                       |                                                                          |          |     |                                                                                                                                                                                                                                                                                                                                                                                                                                                                                                                                                                                                                                                                                                                                                                                                                                                                                                                                                                                                                                                                                                                                                                                                                                                                                                                                                                         |
|-----|-------------------------------------------------------|--------------------------------------------------------------------------|----------|-----|-------------------------------------------------------------------------------------------------------------------------------------------------------------------------------------------------------------------------------------------------------------------------------------------------------------------------------------------------------------------------------------------------------------------------------------------------------------------------------------------------------------------------------------------------------------------------------------------------------------------------------------------------------------------------------------------------------------------------------------------------------------------------------------------------------------------------------------------------------------------------------------------------------------------------------------------------------------------------------------------------------------------------------------------------------------------------------------------------------------------------------------------------------------------------------------------------------------------------------------------------------------------------------------------------------------------------------------------------------------------------|
|     |                                                       |                                                                          |          |     | A, DHPS, DMC1, DOK2, DPP4, DSG2, ECHS1, ECI2, EP300, EPHA3, EPS8L2, ERBB4, ERI1, ESR1, ETF1, EXOSC9, F2, F3, FABP7, FAP, FAS, FCGR2A, FHIT, FLNB, FN1, G6PD, GAD2, GALM, GALNT10, GART, GC, GGPS1, GRHPR, GRK2, GRK6, GTF2F2, GTF2I, HADH, HASPIN, HBB, HBEGF, HCK, HDAC7, HDX, HIBCH, HK2, HLA, DRB1, HMGB3, HMGCS1, HMOX1, HNRNPA2B1, HPD, HSCB, HSD17B10, HSD17B4, HSP90AB1, HTR1A, IDE, IFNG, IFNGR1, IGF1R, IMPA2, IMPDH1, IQUB, ITGB3, ITPK1, ITPKC, ITS1, KIF11, KLK1, KMT5A, KYNU, LRBA, MAGEA4, MAGI2, MAP3K3, MAPK6, MARF1, MARK1, MATK, MDH1, MECP, MMP2, MSH2, MSN, MTAP, MUC1, MYBPC1, MYBPC3, NAE1, NBEA, NCBP1, NCOA3, NF2, NFATC1, NMRK1, NMT1, NOTCH1, NSUN5, NT5C3A, NUP214, OAT, ODC1, OXSR1, PA2G4, PAFAH1B2, PAH, PANK1, PAPSS1, PARN, PARP3, PATJ, PC, PCYT2, PDHA1, PDK2, PDK3, PDK4, PEX5, PGC, PGK1, PHF24, POT1, POU2F1, PPARG, PPP2R1A, PRKCB, PSAP, PTK2B, PTPRE, PTPRF, PUS10, PYGL, RAB26, RAC1, RARA, RARG, RBBP6, RBM39, RGS6, RND1, RRM1, RTN4IP1, RUVBL1, S100A6, SART3, SEC23A, SEMA4D, SERPINA5, SF3B6, SFMBT2, SFN, SH2B2, SH3YL1, SKP1, SLC5A1, SLK, SMAP1, SMG5, SMG7, SMTN, SMURF2, SNX1, SNX22, SPEF1, STARD13, STK16, STK4, SULT1A1, SYT13, TAF13, THBS2, TJP1, TLR4, TNFAIP8L2, TRIM21, TTR, UEVLD, USP19, UTRN, VAV3, VEGFB, VPS26A, WEE1, WHRN, WWP1, XRCC6, YWHAH, YY1, ZBTB43, ZCWPW1, ZEB2, ZFP28, ZIC3, ZNF292, ZNF462 |
| 399 | Cell cycle progression of tumor cell lines            | Cell Cycle                                                               | 1.30E,05 | 17  | AR, CAMK4, EP300, ESR1, HBEGF, HMOX1, IGF1R, NOTCH1, PPARG, RAC1, RARA, RRM1, SFN, TLR4, WEE1, XIAP, XRCC6                                                                                                                                                                                                                                                                                                                                                                                                                                                                                                                                                                                                                                                                                                                                                                                                                                                                                                                                                                                                                                                                                                                                                                                                                                                              |
| 400 | HER2 negative hormone receptor negative breast cancer | Cancer, Organismal Injury and Abnormalities, Reproductive System Disease | 1.31E,05 | 13  | AR, CERT1, ERBB4, ESR1, FAS, HCK, HSP90AB1, MMP2, MUC1, PARP3, PPARG, RRM1, WEE1                                                                                                                                                                                                                                                                                                                                                                                                                                                                                                                                                                                                                                                                                                                                                                                                                                                                                                                                                                                                                                                                                                                                                                                                                                                                                        |
| 401 | Glioma cancer                                         | Cancer, Neurological Disease, Organismal Injury and Abnormalities        | 1.32E,05 | 176 | ACACB, ACADSB, ACADVL, ACVR2B, ADH7, ALB, ALK, ALOX12, AMY1C (includes others), AOC3, APEX1, APPL1, ARHGAP5, ARHGEF1, ASAP1, ATP7B, ATXN3, B3GAT2, BCR, BMP1, BPI, C1R, C8A, CLCN5, CRYM, CSDE1, CSF2RB, CSNK1G1, CSNK1G2, CSTF2, CTCF, CUL1, CYP2E1, DAPK2, DCXR, DGKA, DOK2, DPP4, DSG2, EP300, EPHA3, EPS8L2, ERBB4, ESR1, F2, FABP7, FAS, FCGR2A, FLNB, FN1, G6PD, GAD2, GALNT10, GART, GRK2, GRK6, GTF2I, HADH, HASPIN, HAT1, HDX, HIBCH, HLA, DRB1, HMBOX1, HMGCS1, HMOX1, HNRNPA2B1, HSD17B10, HSD17B4, HSP90AB1, IDE, IFNG, IFNGR1, IGF1R, ITGB3, ITPK1, ITS1, KMT5A, KYNU, LRBA, MAGEA4, MAGI2, MAP3K3, MARF1, MATK, MMP2, MSH2, MSN, MTAP, MUC1, MYBPC1, MYBPC3, NBEA, NCBP1, NCOA3, NF2, NFATC1, NME3, NMT1, NOTCH1, NR1I3, NSUN5, NUP214, ODC1, OXSR1, PA2G4, PAFAH1B2, PAH, PANK1, PAPSS1, PARN, PATJ, PC, PCYT2, PDHA1, PDK4, PGC, PGK1, PHF24, PIP4K2C, POT1, POU2F1, PPARG, PPP2R1A, PRKCB, PSAP, PTK2B, PTPRE, PTPRF, PUS10, PYGL, RAC1, RARA, RARG, RBBP6, RBM39, RBP5, RGS6, RRM1, RTN4IP1, SART3, SEMA4D, SENP2, SERPINA5, SFMBT2, SH2B2, SH3YL1, SLC5A1, SLK, SMG5, SMURF2, SNX1, STARD13, SUB1, TAF13, THBS2, TIMM9, TJP1, TLR4, TNFAIP8L2, USP19, UTRN, VAV3, VEGFB, VPS26A, WEE1, WHRN, XRCC6, YWHAQ, ZBTB43, ZCWPW1, ZEB2, ZFP28, ZIC3, ZNF292, ZNF462                                                                                         |
| 402 | Interphase of tumor cell lines                        | Cell Cycle                                                               | 1.34E,05 | 23  | AASDHPPT, AR, BTRC, CHKA, DPP4, EP300, F2, FAS, FHIT, HMOX1, IFNG, IGF1R, KIF11, MSH2, NAE1, NCOA3, NOTCH1, PPARG, SART3, SFN, TRIM21, WEE1, YWHAQ                                                                                                                                                                                                                                                                                                                                                                                                                                                                                                                                                                                                                                                                                                                                                                                                                                                                                                                                                                                                                                                                                                                                                                                                                      |
| 403 | Brain glioma                                          | Cancer, Neurological Disease, Organismal Injury and Abnormalities        | 1.37E,05 | 174 | ACACB, ACADSB, ACADVL, ACVR2B, ADH7, ALB, ALK, ALOX12, AMY1C (includes others), AOC3, APEX1, APPL1, ARHGAP5, ARHGEF1, ASAP1, ATP7B, ATXN3, B3GAT2, BCR, BMP1, BPI, C1R, C8A, CLCN5, CRYM, CSDE1, CSF2RB, CSNK1G1, CSNK1G2, CSTF2, CTCF, CUL1, CYP2E1, DAPK2, DCXR, DGKA, DOK2, DPP4, DSG2, EP300, EPHA3, EPS8L2, ERBB4, ESR1, F2, FAS, FCGR2A, FLNB, FN1, G6PD, GAD2, GALNT10, GART, GRK2, GRK6, GTF2I, HADH, HASPIN, HAT1, HDX, HIBCH, HLA, DRB1, HMBOX1, HMGB3, HMGCS1, HMOX1, HNRNPA2B1, HSD17B10, HSD17B4, HSP90AB1, IDE, IFNGR1, IGF1R, ITGB3, ITPK1, ITS1, KMT5A, KYNU, LRBA, MAGEA4, MAGI2, MAP3K3, MARF1, MATK, MMP2, MSH2, MSN, MTAP, MUC1, MYBPC1, MYBPC3, NBEA, NCBP1, NCOA3, NF2, NFATC1, NME3, NMT1, NOTCH1, NR1I3, NSUN5, NUP214, ODC1, OXSR1, PAFAH1B2, PAH, PANK1, PAPSS1, PARN, PATJ, PC, PCYT2, PDHA1, PDK4, PGC, PGK1, PHF24, PIP4K2C, POT1, POU2F1, PPARG, PPP2R1A, PRKCB, PSAP, PTK2B, PTPRE, PTPRF, PUS10, PYGL, RAC1, RARA, RARG, RBBP6, RBM39, RBP5, RGS6, RRM1, RTN4IP1, SART3, SEMA4D, SENP2, SERPINA5, SFMBT2, SH2B2, SH3YL1, SLC5A1, SLK, SMG5, SMURF2, SNX1, STARD13, SUB1, THBS2, TIMM9, TJP1, TLR4, TNFAIP8L2, USP19, UTRN, VAV3, VEGFB, VPS26A, WEE1, WHRN, XIAP, XRCC6, YWHAQ, ZBTB43, ZCWPW1, ZEB2, ZFP28, ZIC3, ZNF292, ZNF462                                                                                                       |

|     |                                                  |                                                                                            |          |     |                                                                                                                                                                                                                                                                                                                                                                                                                                                                                                                                                                                                                                                                                                                                                                                                                                                                                                                                                                                                                                                                                                                                                                                                                                                                                                                                                                            |
|-----|--------------------------------------------------|--------------------------------------------------------------------------------------------|----------|-----|----------------------------------------------------------------------------------------------------------------------------------------------------------------------------------------------------------------------------------------------------------------------------------------------------------------------------------------------------------------------------------------------------------------------------------------------------------------------------------------------------------------------------------------------------------------------------------------------------------------------------------------------------------------------------------------------------------------------------------------------------------------------------------------------------------------------------------------------------------------------------------------------------------------------------------------------------------------------------------------------------------------------------------------------------------------------------------------------------------------------------------------------------------------------------------------------------------------------------------------------------------------------------------------------------------------------------------------------------------------------------|
| 404 | Stage IIIA cancer                                | Cancer,Organismal Injury and Abnormalities                                                 | 1.37E,05 | 8   | ALB,ALK,ERBB4,ESR1,GART,GGPS1,HSP90AB1,RRM1                                                                                                                                                                                                                                                                                                                                                                                                                                                                                                                                                                                                                                                                                                                                                                                                                                                                                                                                                                                                                                                                                                                                                                                                                                                                                                                                |
| 405 | Colony formation of colorectal cancer cell lines | Cellular Development,Cellular Growth and Proliferation                                     | 1.38E,05 | 7   | IFNG,NOTCH1,PKD4,PPP2R1A,RARG,VEGFB,XIAP                                                                                                                                                                                                                                                                                                                                                                                                                                                                                                                                                                                                                                                                                                                                                                                                                                                                                                                                                                                                                                                                                                                                                                                                                                                                                                                                   |
| 406 | Bile duct adenocarcinoma                         | Cancer,Gastrointestinal Disease,Hepatic System Disease,Organismal Injury and Abnormalities | 1.38E,05 | 16  | ACY1,ADH1C,ALB,ALK,EP8L2,FAP,GC,HPD,HSP90AB1,MMP2,NOTCH1,PGK1,POU2F1,RRM1,SH2B2,TLR4                                                                                                                                                                                                                                                                                                                                                                                                                                                                                                                                                                                                                                                                                                                                                                                                                                                                                                                                                                                                                                                                                                                                                                                                                                                                                       |
| 407 | Gastrointestinal carcinoma                       | Cancer,Gastrointestinal Disease,Organismal Injury and Abnormalities                        | 1.38E,05 | 230 | ACACB,ACADSB,ACADVL,ACSM2A,ACVR2B,ACY1,ADH7,ALB,ALK,ALOX12,ANXA6,AOC3,APEX1,APPL1,AR,ARF6,ARHGAP5,ARHGEF1,ASAP1,ATP7B,ATXN3,B2M,B3GAT2,BCR,BMP1,BPI,BTK,BTRC,C1R,C8A,CAMK4,CANT1,CD1A,CD74,CDK5R1,CHKA,CLCN5,CSDE1,CSF2RB,CSNK1G1,CSNK1G2,CSTF2,CTCF,CUL1,CYP17A1,CYP2E1,CYP2R1,CYP7A1,DAPK2,DCXR,DFFA,DGKA,DHPS,DMC1,DOK2,DPP4,DSG2,ECHS1,EP300,EPA3,EP8L2,ERBB4,ESR1,ETF1,EXOSC9,F2,F3,FABP7,FAP,FAS,FHIT,FLNB,FN1,G6PD,GAD2,GALM,GALNT10,GART,GRHR,GRK2,GRK6,GTF2I,HADH,HASPIN,HBB,HCK,HDAC7,HDX,HIBCH,HK2,HLA,DRB1,HMGB3,HMOX1,HNRNPA2B1,HPD,HSCB,HSD17B10,HSD17B4,HSP90AB1,HTR1A,IDE,IFNGR1,IGF1R,IMPA2,IMPDH1,IQUB,ITGB3,ITPK1,ITPKC,ITSN1,KIF11,KLK1,KMT5A,KYNU,LRBA,MAGEA4,MAGI2,MAP3K3,MAPK6,MARF1,MARK1,MATK,MECR,MMP2,MSH2,MSN,MTAP,MUC1,MYBPC1,MYBPC3,NAE1,NBEA,NCBP1,NCOA3,NF2,NFATC1,NMRK1,NMT1,NOTCH1,NSUN5,NT5C3A,NUP214,OAT,ODC1,OXSR1,PA2G4,PAFAH1B2,PAH,PANK1,PAPSS1,PARN,PARP3,PATJ,PC,PCYT2,PDHA1,PKD2,PKD3,PKD4,PEX5,PGC,PGK1,PHF24,POT1,POU2F1,PPARG,PPP2R1A,PRKCB,PTK2B,PTPRE,PTPRF,PUS10,PYGL,RAB26,RAC1,RARA,RARG,RBBP6,RBM39,RGS6,RND1,RRM1,RTN4IP1,RUVBL1,SART3,SEC23A,SEMA4D,SERPINA5,SF3B6,SFMBT2,SH2B2,SH3YL1,SKP1,SLC5A1,SLK,SMAP1,SMG5,SMG7,SMTN,SMURF2,SNX1,SPEF1,STARD13,STK16,SULT1A1,SYT13,TAF13,THBS2,TJP1,TLR4,TRIM21,UEVLD,USP19,UTRN,VAV3,VEGFB,VPS26A,WEE1,WHRN,WWP1,XRCC6,YWHAH,YY1,ZBTB43,ZCWPW1,ZEB2,ZFP28,ZIC3,ZNF292,ZNF462 |
| 408 | Adult T,cell leukemia/lymphoma                   | Cancer,Hematological Disease,Immunological Disease,Organismal Injury and Abnormalities     | 1.41E,05 | 9   | B2M,DPP4,EP300,FAS,FHIT,HNRNPA2B1,NOTCH1,POT1,PRKCB                                                                                                                                                                                                                                                                                                                                                                                                                                                                                                                                                                                                                                                                                                                                                                                                                                                                                                                                                                                                                                                                                                                                                                                                                                                                                                                        |
| 409 | Cell viability of carcinoma cell lines           | Cell Death and Survival                                                                    | 1.41E,05 | 15  | ALK,APEX1,FHIT,FN1,HBEGF,HCK,HK2,HMOX1,IGF1R,KIF11,MSH2,NOTCH1,PTK2B,RRM1,SFN                                                                                                                                                                                                                                                                                                                                                                                                                                                                                                                                                                                                                                                                                                                                                                                                                                                                                                                                                                                                                                                                                                                                                                                                                                                                                              |
| 410 | Stage IV secondary tumor                         | Cancer,Organismal Injury and Abnormalities                                                 | 1.49E,05 | 11  | ALB,ALK,AR,ERBB4,ESR1,GART,HSP90AB1,IGF1R,PARP3,PTK2B,RRM1                                                                                                                                                                                                                                                                                                                                                                                                                                                                                                                                                                                                                                                                                                                                                                                                                                                                                                                                                                                                                                                                                                                                                                                                                                                                                                                 |
| 411 | Apoptosis of colorectal cancer cell lines        | Cell Death and Survival                                                                    | 1.50E,05 | 17  | BTK,DAPK2,DFFA,DSG2,DTYMK,EP300,FAS,IFNG,MUC1,NOTCH1,PPARG,RAC1,SFN,SMURF2,SNX1,TLR4,XIAP                                                                                                                                                                                                                                                                                                                                                                                                                                                                                                                                                                                                                                                                                                                                                                                                                                                                                                                                                                                                                                                                                                                                                                                                                                                                                  |
| 412 | Stage III,IV breast cancer                       | Cancer,Organismal Injury and Abnormalities,Reproductive System Disease                     | 1.50E,05 | 10  | ALB,AR,ERBB4,ESR1,FN1,GGPS1,HMOX1,HSP90AB1,PARP3,RRM1                                                                                                                                                                                                                                                                                                                                                                                                                                                                                                                                                                                                                                                                                                                                                                                                                                                                                                                                                                                                                                                                                                                                                                                                                                                                                                                      |
| 413 | Metastatic gastrointestinal carcinoma            | Cancer,Gastrointestinal Disease,Organismal Injury and Abnormalities                        | 1.50E,05 | 10  | ALB,ALK,ERBB4,FAS,GART,HSP90AB1,MMP2,PARP3,RAC1,RRM1                                                                                                                                                                                                                                                                                                                                                                                                                                                                                                                                                                                                                                                                                                                                                                                                                                                                                                                                                                                                                                                                                                                                                                                                                                                                                                                       |
| 414 | Muscle tumor                                     | Cancer,Organismal Injury and Abnormalities,Skeletal and Muscular Disorders                 | 1.51E,05 | 31  | ACACB,ALK,AR,CLCN5,CSF2RB,CYP7A1,ERBB4,ESR1,FAP,FAS,FN1,HSD17B10,HSP90AB1,IGF1R,KMT5A,MDH1,MMP2,MSH2,NOTCH1,PKD4,PPARG,PRKCB,RRM1,S100A6,SEC23A,SLK,TAF13,TJP1,TLR4,UTRN,WEE1                                                                                                                                                                                                                                                                                                                                                                                                                                                                                                                                                                                                                                                                                                                                                                                                                                                                                                                                                                                                                                                                                                                                                                                              |
| 415 | Stage I epithelial cancer                        | Cancer,Organismal Injury and Abnormalities                                                 | 1.52E,05 | 9   | ALK,B2M,ERBB4,FN1,GART,HSP90AB1,MUC1,PGC,RRM1                                                                                                                                                                                                                                                                                                                                                                                                                                                                                                                                                                                                                                                                                                                                                                                                                                                                                                                                                                                                                                                                                                                                                                                                                                                                                                                              |

|     |                                                        |                                                                                                                                                                  |          |    |                                                                                                                                                                                                                  |
|-----|--------------------------------------------------------|------------------------------------------------------------------------------------------------------------------------------------------------------------------|----------|----|------------------------------------------------------------------------------------------------------------------------------------------------------------------------------------------------------------------|
| 416 | Replication of virus                                   | Infectious Diseases                                                                                                                                              | 1.53E,05 | 24 | B2M,CANT1,CLK1,CYP17A1,CYP2E1,DAPK2,ESR1,G6PD,GRK2,GRK6,HCK,IFNG,KIF11,MDH1,MSH2,NCOA3,NUP214,OXSR1,PTK2B,SERPINA5,SF3B6,TLR4,TRIM21,ZEB2                                                                        |
| 417 | Ruffling of plasma membrane                            | Cell Morphology                                                                                                                                                  | 1.55E,05 | 4  | ARF6,HMOX1,IQUB,NF2                                                                                                                                                                                              |
| 418 | Stage IIIB locally advanced non,small cell lung cancer | Cancer,Organismal Injury and Abnormalities,Respiratory Disease                                                                                                   | 1.61E,05 | 6  | ALK,ERBB4,GART,HSP90AB1,IGF1R,RRM1                                                                                                                                                                               |
| 419 | Advanced nonsquamous non,small cell lung carcinoma     | Cancer,Organismal Injury and Abnormalities,Respiratory Disease                                                                                                   | 1.64E,05 | 9  | ALB,ALK,ERBB4,GART,HSP90AB1,IGF1R,PARP3,PTK2B,RRM1                                                                                                                                                               |
| 420 | Transformation of tumor cell lines                     | Cancer                                                                                                                                                           | 1.65E,05 | 8  | ARF6,ERBB4,HNRNPA2B1,IGF1R,MATK,RAC1,SFN,STARD13                                                                                                                                                                 |
| 421 | Serous neoplasm                                        | Cancer,Organismal Injury and Abnormalities                                                                                                                       | 1.66E,05 | 40 | ALB,ALK,AOC3,AR,ARF6,B2M,BCR,CA8,CSF2RB,CTCF,DPP4,EP300,EPHA3,F2,F3,GART,HBB,HCK,HDAC7,HSP90AB1,HTR1A,ITSN1,KIF11,MAGEA4,MAP3K3,MUC1,NF2,NOTCH1,NT5C3A,PARP3,PK4,PGC,PPP2R1A,PYGL,RRM1,SKP1,SMTN,THBS2,TLR4,VAV3 |
| 422 | Familial cardiovascular disease                        | Cardiovascular Disease,Hereditary Disorder,Organismal Injury and Abnormalities                                                                                   | 1.68E,05 | 24 | ACADVL,ACVR2B,B3GAT3,CA8,DPP4,DSG2,ECI2,F2,FAS,HTR1A,IMPDH1,ITGB3,ITPKC,KYNU,MYBPC3,NOTCH1,PPARG,RRM1,STK4,TIMM9,TJP1,TTR,WWP1,ZIC3                                                                              |
| 423 | Adhesion of tumor cell lines                           | Cell,To,Cell Signaling and Interaction                                                                                                                           | 1.71E,05 | 18 | ARHGEF1,DSG2,F2,FN1,GRK6,IFNG,IGF1R,ITGB3,MMP2,MUC1,NOTCH1,PPARG,PTK2B,RAC1,SNX1,TJP1,UTRN,ZEB2                                                                                                                  |
| 424 | Proliferation of blood cells                           | Cellular Development,Cellular Growth and Proliferation                                                                                                           | 1.75E,05 | 19 | ACP3,ARF6,BCR,CD74,CSF2RB,DGKA,DPP4,FAS,FN1,HLA,DRB1,HMOX1,HNRNPA2B1,IFNG,IGF1R,ITGB3,MSH2,MSN,SEMA4D,VAV3                                                                                                       |
| 425 | X,linked hereditary disease                            | Hereditary Disorder,Organismal Injury and Abnormalities                                                                                                          | 1.77E,05 | 24 | AR,BMP1,BTK,CD74,CLCN5,CYP17A1,DAPK2,ESR1,FCGR2A,G6PD,HLA,DRB1,HMGB3,HSD17B10,MSN,PDHA1,PDK3,PGK1,TAF13,TLR4,UTRN,WHRN,XIAP,ZIC3,ZNF462                                                                          |
| 426 | Neuromuscular disease                                  | Neurological Disease,Skeletal and Muscular Disorders                                                                                                             | 1.90E,05 | 37 | ADH1C,ALB,ARHGEF1,BCR,BTK,CD74,CDK5R1,CRYM,ESR1,F3,FAS,FCGR2A,FHIT,GGPS1,HADH,HDAC7,HLA,DRB1,HMOX1,HTR1A,IFNG,IMPDH1,ITGB3,MDH1,NBEA,NDUFAB1,PGK1,PPARG,PRKCB,PSAP,PTK2B,PTPRE,RRM1,SMTN,SUB1,TLR4,XIAP,XRCC6    |
| 427 | Metastatic squamous cell carcinoma                     | Cancer,Organismal Injury and Abnormalities                                                                                                                       | 1.91E,05 | 9  | ALK,ERBB4,F3,GART,HSP90AB1,IGF1R,PARP3,PTK2B,RRM1                                                                                                                                                                |
| 428 | Rheumatoid arthritis                                   | Connective Tissue Disorders,Immunological Disease,Inflammatory Disease,Inflammatory Response,Organismal Injury and Abnormalities,Skeletal and Muscular Disorders | 1.95E,05 | 32 | ALB,ALOX12,ANG,ASAP1,B2M,CD1A,CD74,CSF2RB,DPP4,FCGR2A,FN1,HCK,HDAC7,HLA,DRB1,HMOX1,IDE,IFNG,IMPDH1,MMP1,MMP2,MTAP,PGK1,PPARG,PTK2B,PTPRE,RGS6,SF3B6,SMG7,TAF13,TJP1,TLR4,XIAP                                    |
| 429 | Quantity of cells                                      | Tissue Morphology                                                                                                                                                | 1.95E,05 | 22 | ALK,AOC3,AR,ARF6,ATXN3,ESR1,FAS,FN1,GAD2,HBB,HMOX1,IFNG,IFNGR1,IGF1R,NOTCH1,PPARG,RAC1,SFN,THBS2,VAV3,VEGFB,XIAP                                                                                                 |
| 430 | Cell spreading of blood cells                          | Cell Morphology,Cellular Movement                                                                                                                                | 1.96E,05 | 5  | ALB,FCGR2A,FN1,PTK2B,RAC1                                                                                                                                                                                        |
| 431 | Locally advanced malignant tumor                       | Cancer,Organismal Injury and Abnormalities                                                                                                                       | 1.98E,05 | 11 | ALK,AR,ERBB4,ESR1,GART,GGPS1,HSP90AB1,IGF1R,PARP3,PTK2B,RRM1                                                                                                                                                     |

|     |                                         |                                                                                                                                     |          |    |                                                                                                                                                                                                                    |
|-----|-----------------------------------------|-------------------------------------------------------------------------------------------------------------------------------------|----------|----|--------------------------------------------------------------------------------------------------------------------------------------------------------------------------------------------------------------------|
| 432 | Cytostasis of tumor cell lines          | Cellular Growth and Proliferation                                                                                                   | 1.98E,05 | 11 | ALK,ESR1,FABP7,FHIT,GRK2,IFNG,IGF1R,NF2,NME3,NOTCH1,RARG                                                                                                                                                           |
| 433 | Proliferation of lung cancer cell lines | Cellular Development,Cellular Growth and Proliferation                                                                              | 2.04E,05 | 19 | AASDHPPT,ALK,CSTF2,DOK2,F3,FHIT,HK2,HMOX1,HNRNPA2B1,IFNG,IGF1R,MMP1,MUC1,NCOA3,NOTCH1,PK4,PPARG,PRKCB,RAC1                                                                                                         |
| 434 | Movement Disorders                      | Neurological Disease                                                                                                                | 2.08E,05 | 38 | ADH1C,ALB,AR,ARHGEF1,ATP7B,ATXN3,BCR,CA8,CD74,CDK5R1,CRYM,DHPS,ESR1,F3,FAS,FCGR2A,HA DH,HMOX1,HTR1A,IFNG,IFNGR1,MDH1,MECR,MYBPC1,NBEA,NDUFAB1,PGK1,PPARG,PRKCB,PSAP,PT K2B,PTPRE,RTN4IP1,SMTN,SUB1,TLR4,XIAP,XRCC6 |
| 435 | Aggregation of blood platelets          | Cell,To,Cell Signaling and Interaction,Hematologic al System Development and Function,Inflammatory Response                         | 2.15E,05 | 8  | ALB,ALOX12,BTK,CANT1,F2,FCGR2A,ITGB3,TLR4                                                                                                                                                                          |
| 436 | Binding of monocytes                    | Cell,To,Cell Signaling and Interaction,Hematologic al System Development and Function,Inflammatory Response                         | 2.15E,05 | 6  | BPI,F2,FN1,ITGB3,PPARG,RAC1                                                                                                                                                                                        |
| 437 | Adhesion of PBMCs                       | Cell,To,Cell Signaling and Interaction,Hematologic al System Development and Function,Immune Cell Trafficking,Inflammatory Response | 2.22E,05 | 4  | F2,F3,IFNG,PPARG                                                                                                                                                                                                   |
| 438 | Apoptosis of leukemia cell lines        | Cell Death and Survival                                                                                                             | 2.25E,05 | 17 | ALK,B2M,CHKA,CSF2RB,DFFA,DPP4,FAS,FN1,HCK,HMOX1,MSN,MUC1,NOTCH1,PRKCB,RAC1,STK4,XIAP                                                                                                                               |
| 439 | Cell death of leukemia cell lines       | Cell Death and Survival                                                                                                             | 2.29E,05 | 19 | ALK,B2M,CHKA,CSF2RB,DFFA,DPP4,FAS,FN1,HCK,HMOX1,IFNG,MSN,MUC1,NOTCH1,PRKCB,RAC1,ST K4,WEE1,XIAP                                                                                                                    |
| 440 | Stage IIIC cancer                       | Cancer,Organismal Injury and Abnormalities                                                                                          | 2.34E,05 | 8  | ALB,ESR1,FN1,GART,GGPS1,HSP90AB1,MUC1,RRM1                                                                                                                                                                         |
| 441 | Recurrent non,small cell lung cancer    | Cancer,Organismal Injury and Abnormalities,Respiratory Disease                                                                      | 2.34E,05 | 8  | ALB,ALK,ERBB4,GART,HSP90AB1,IGF1R,PTK2B,RRM1                                                                                                                                                                       |
| 442 | Invasive breast cancer                  | Cancer,Organismal Injury and Abnormalities,Reproductive System Disease                                                              | 2.34E,05 | 18 | ALB,AR,CSF2RB,ERBB4,ESR1,FAP,FAS,FN1,HSP90AB1,MMP2,MYBPC3,PARP3,PK4,PTPRE,PTPRF,RBM3 9,RRM1,YWHAQ                                                                                                                  |
| 443 | Vascular tumor                          | Cancer,Cardiovascular Disease,Organismal Injury and Abnormalities                                                                   | 2.35E,05 | 15 | ALK,AR,BCR,CSF2RB,ESR1,HSP90AB1,IGF1R,MSH2,MSN,NOTCH1,PPARG,RARA,RARG,TJP1,ZEB2                                                                                                                                    |
| 444 | Glycolysis of cells                     | Carbohydrate Metabolism                                                                                                             | 2.35E,05 | 10 | ESR1,HK2,IGF1R,ITGB3,NCOA3,NUP214,PDHA1,PK4,PGK1,SENP2                                                                                                                                                             |

|     |                                                          |                                                                                                                    |          |    |                                                                                                                                                                                                                                                                                                                                                                                              |
|-----|----------------------------------------------------------|--------------------------------------------------------------------------------------------------------------------|----------|----|----------------------------------------------------------------------------------------------------------------------------------------------------------------------------------------------------------------------------------------------------------------------------------------------------------------------------------------------------------------------------------------------|
| 445 | Cell movement of neutrophils                             | Cellular Movement,Hematological System Development and Function,Immune Cell Trafficking,Inflammatory Response      | 2.35E,05 | 10 | ALB,DAPK2,DPP4,FAS,FN1,IFNG,ITGB3,PRKCB,RAC1,TLR4                                                                                                                                                                                                                                                                                                                                            |
| 446 | Stage IV epithelial cancer                               | Cancer,Organismal Injury and Abnormalities                                                                         | 2.35E,05 | 10 | ALB,ALK,ERBB4,ESR1,GART,HSP90AB1,IGF1R,PARP3,PTK2B,RRM1                                                                                                                                                                                                                                                                                                                                      |
| 447 | Progressive metastatic carcinoma                         | Cancer,Organismal Injury and Abnormalities,Tumor Morphology                                                        | 2.37E,05 | 9  | ALK,ERBB4,ESR1,F3,GART,HSP90AB1,IGF1R,PTK2B,RRM1                                                                                                                                                                                                                                                                                                                                             |
| 448 | Quantity of tumor cell lines                             | Tissue Morphology                                                                                                  | 2.38E,05 | 14 | ALK,AR,ARF6,ESR1,FAS,FN1,HMOX1,IFNG,IGF1R,NOTCH1,RAC1,SFN,VAV3,VEGFB                                                                                                                                                                                                                                                                                                                         |
| 449 | Acute leukemia                                           | Cancer,Hematological Disease,Immunological Disease,Organismal Injury and Abnormalities                             | 2.44E,05 | 66 | ALB,ALK,AMY1C (includes others),APEX1,ARHGAP5,BCR,BTK,BTRC,C8A,CANT1,CD1A,CD74,CDK5R1,CIAO1,CSF2RB,CTCF,CYP2E1,CYP2R1,EP300,EPA3,ESR1,ETF1,F2,F3,FAP,FAS,GRK2,HASPIN,HCK,HLA,DRB1,HSP90AB1,IFNG,IGF1R,IMPDH1,ITGB3,KLK1,KMT5A,LRBA,MAGEA4,MSH2,NCOA3,NOTCH1,NT5C3A,NUP214,PA2G4,PDHA1,PK3,PGC,PTK2B,PYGL,RAC1,RARA,RARG,RRM1.SH2B2,SMG5,SMG7,SMTN,SYT13,TJP1,TLR4,UEVLD,VEGFB,WEE1,XIAP,ZEB2 |
| 450 | Proliferation of cancer cells                            | Cancer,Cellular Development,Cellular Growth and Proliferation,Organismal Injury and Abnormalities,Tumor Morphology | 2.46E,05 | 12 | AR,BTK,ESR1,FHIT,IFNG,IGF1R,MUC1,NOTCH1,ODC1,PTK2B,RUVBL1,XIAP                                                                                                                                                                                                                                                                                                                               |
| 451 | TP53 mutation negative malignant solid tumor             | Cancer,Organismal Injury and Abnormalities                                                                         | 2.48E,05 | 3  | AR,BTK,CYP17A1                                                                                                                                                                                                                                                                                                                                                                               |
| 452 | Arrest in G0/G1 phase transition of carcinoma cell lines | Cell Cycle                                                                                                         | 2.48E,05 | 3  | AASDHPPT,FHIT,IFNG                                                                                                                                                                                                                                                                                                                                                                           |
| 453 | Benign facial lentiginoses                               | Dermatological Diseases and Conditions,Organismal Injury and Abnormalities                                         | 2.48E,05 | 3  | ODC1,RARA,RARG                                                                                                                                                                                                                                                                                                                                                                               |
| 454 | Mottled facial hypopigmentation                          | Dermatological Diseases and Conditions,Organismal Injury and Abnormalities                                         | 2.48E,05 | 3  | ODC1,RARA,RARG                                                                                                                                                                                                                                                                                                                                                                               |
| 455 | Mottled facial hyperpigmentation                         | Dermatological Diseases and Conditions,Organismal Injury and Abnormalities                                         | 2.48E,05 | 3  | ODC1,RARA,RARG                                                                                                                                                                                                                                                                                                                                                                               |
| 456 | Efflux of L,triiodothyronine                             | Amino Acid Metabolism,Molecular Transport,Small Molecule Biochemistry                                              | 2.48E,05 | 3  | ALB,CRYM,TTR                                                                                                                                                                                                                                                                                                                                                                                 |

|     |                                         |                                                                                                                                                                                 |          |    |                                                                                                                                                                                                                                                                    |
|-----|-----------------------------------------|---------------------------------------------------------------------------------------------------------------------------------------------------------------------------------|----------|----|--------------------------------------------------------------------------------------------------------------------------------------------------------------------------------------------------------------------------------------------------------------------|
| 457 | Ovarian serous tumor                    | Cancer,Endocrine System Disorders,Organismal Injury and Abnormalities,Reproductive System Disease                                                                               | 2.48E,05 | 34 | ALB,ALK,AR,ARF6,B2M,BCR,CA8,CSF2RB,CTCF,DPP4,EP300,EPA3,F2,GART,HCK,HSP90AB1,HTR1A,ITSN1,MAGEA4,MAP3K3,MUC1,NF2,NOTCH1,NT5C3A,PARP3,PKD4,PGC,PPP2R1A,PYGL,RRM1,SKP1,THBS2,TLR4,VAV3                                                                                |
| 458 | Hematopoiesis of mononuclear leukocytes | Cellular Development,Cellular Growth and Proliferation,Hematological System Development and Function,Hematopoiesis,Lymphoid Tissue Structure and Development,Tissue Development | 2.50E,05 | 13 | BTK,CD74,CSF2RB,FAS,HLA,DRB1,IFNG,ITGB3,MSN,NOTCH1,PPARG,RAC1,RARA,TLR4                                                                                                                                                                                            |
| 459 | Biliary tract adenocarcinoma            | Cancer,Gastrointestinal Disease,Hepatic System Disease,Organismal Injury and Abnormalities                                                                                      | 2.57E,05 | 17 | ACY1,ADH1C,ALB,ALK,BCR,EP8L2,FAP,GC,HPD,HSP90AB1,MMP2,NOTCH1,PGK1,POU2F1,RRM1,SH2B2,TLR4                                                                                                                                                                           |
| 460 | Graft,vs,host disease                   | Immunological Disease                                                                                                                                                           | 2.65E,05 | 7  | BTK,CSF2RB,DPP4,FCGR2A,FN1,IMPDH1,RRM1                                                                                                                                                                                                                             |
| 461 | Cell death of stomach cancer cell lines | Cell Death and Survival                                                                                                                                                         | 2.77E,05 | 8  | ALB,ALOX12,CD74,FAS,HK2,IGF1R,PRKCB,TLR4                                                                                                                                                                                                                           |
| 462 | Stage III non,small cell lung cancer    | Cancer,Organismal Injury and Abnormalities,Respiratory Disease                                                                                                                  | 2.77E,05 | 8  | ALB,ALK,ERBB4,GART,HSP90AB1,IGF1R,PARP3,RRM1                                                                                                                                                                                                                       |
| 463 | Secretion of molecule                   | Molecular Transport                                                                                                                                                             | 2.80E,05 | 14 | ANG,ARF6,CD74,CYP2E1,F2,FCGR2A,FN1,GAD2,IFNG,IGF1R,PPARG,PRKCB,STK4,USP19                                                                                                                                                                                          |
| 464 | Anaplastic carcinoma                    | Cancer,Organismal Injury and Abnormalities                                                                                                                                      | 2.84E,05 | 24 | ALK,AMY1C (includes others),AR,DSG2,EPA3,ERBB4,FN1,GALNT10,GART,GRK2,HASPIN,HSP90AB1,IGF1R,MMP1,MSH2,PARP3,PGK1,PTK2B,RRM1,SLK,STK4,TLR4,YY1,ZEB2                                                                                                                  |
| 465 | Transitional,cell carcinoma             | Cancer,Organismal Injury and Abnormalities                                                                                                                                      | 2.91E,05 | 18 | AR,CTCF,EP300,EPA3,ERBB4,FN1,GART,HSP90AB1,MMP2,NCOA3,NF2,NOTCH1,PARP3,PPP2R1A,PRKCB,RARA,RRM1,TLR4                                                                                                                                                                |
| 466 | Aggregation of blood cells              | Cell,To,Cell Signaling and Interaction,Hematological System Development and Function                                                                                            | 2.93E,05 | 9  | ALB,ALOX12,BTK,CANT1,F2,FCGR2A,ITGB3,SEMA4D,TLR4                                                                                                                                                                                                                   |
| 467 | Sarcoma                                 | Cancer,Organismal Injury and Abnormalities                                                                                                                                      | 2.93E,05 | 47 | ACACB,ALK,ANG,AR,CSF2RB,CYP7A1,DHPS,ERBB4,ESR1,F2,FABP7,FAP,FN1,GGPS1,HMGCS1,HSD17B4,HSP90AB1,IGF1R,KMT5A,MAPK6,MMP1,MMP2,MSH2,NAE1,NBEA,NCBP1,NF2,NOTCH1,PARP3,PKD4,PEX5,PGK1,PHF24,PPARG,PPP2R1A,PRKCB,RARA,RARG,RRM1,SEC23A,SEMA4D,SLK,TJP1,TLR4,UTRN,WPI1,ZIC3 |
| 468 | Permeability of vascular system         | Cardiovascular System Development and Function,Tissue Morphology                                                                                                                | 2.94E,05 | 7  | ARF6,F2,IFNG,IQUB,MMP2,PTK2B,RAC1                                                                                                                                                                                                                                  |
| 469 | Blastoma                                | Cancer,Organismal Injury and Abnormalities                                                                                                                                      | 2.98E,05 | 23 | CSF2RB,EP300,EPA3,ERBB4,FABP7,FN1,GART,HNRNPA2B1,HSP90AB1,IDE,IFNG,ITGB3,MSH2,NBEA,PA2G4,PRKCB,RAC1,RRM1,TAF13,THBS2,TLR4,VAV3,ZEB2                                                                                                                                |



|     |                                               |                                                                                  |          |     |                                                                                                                                                                                                                                                                                                                                                                                                                                                                                                                                                                                                                                                                                                                                                                                                                                                                                                                                                   |
|-----|-----------------------------------------------|----------------------------------------------------------------------------------|----------|-----|---------------------------------------------------------------------------------------------------------------------------------------------------------------------------------------------------------------------------------------------------------------------------------------------------------------------------------------------------------------------------------------------------------------------------------------------------------------------------------------------------------------------------------------------------------------------------------------------------------------------------------------------------------------------------------------------------------------------------------------------------------------------------------------------------------------------------------------------------------------------------------------------------------------------------------------------------|
| 470 | Thrombus                                      | Cardiovascular Disease,Hematological Disease,Organismal Injury and Abnormalities | 3.00E,05 | 10  | ALOX12,AR,ESR1,F2,F3,ITGB3,MMP2,RRM1,SERPINA5,VEGFB                                                                                                                                                                                                                                                                                                                                                                                                                                                                                                                                                                                                                                                                                                                                                                                                                                                                                               |
| 471 | Interphase of lung cancer cell lines          | Cell Cycle                                                                       | 3.00E,05 | 8   | AASDHPPT,BTRC,EP300,FHIT,HMOX1,IFNG,NOTCH1,SART3                                                                                                                                                                                                                                                                                                                                                                                                                                                                                                                                                                                                                                                                                                                                                                                                                                                                                                  |
| 472 | Concentration of lipid                        | Lipid Metabolism,Molecular Transport,Small Molecule Biochemistry                 | 3.05E,05 | 15  | ACACB,ALB,ARF6,BCR,CERT1,CHKA,CYP7A1,EP300,F2,FAS,HMOX1,IFNG,PPARG,PSAP,RAC1                                                                                                                                                                                                                                                                                                                                                                                                                                                                                                                                                                                                                                                                                                                                                                                                                                                                      |
| 473 | Amyloidosis                                   | Metabolic Disease,Organismal Injury and Abnormalities                            | 3.05E,05 | 29  | ALB,AR,B2M,C1R,CD74,CDK5R1,ESR1,F3,FCGR2A,GAD2,GC,GGPS1,HMOX1,HNRNPA2B1,HTR1A,IDE,MP1,MMP2,NAE1,NOTCH1,PPARG,PRKCB,PSAP,PTPRE,SMTN,TAF13,TLR4,TTR,XIAP                                                                                                                                                                                                                                                                                                                                                                                                                                                                                                                                                                                                                                                                                                                                                                                            |
| 474 | Cell death of immune cells                    | Cell Death and Survival                                                          | 3.14E,05 | 16  | BTK,CAMK4,FAS,FN1,HBB,IFNG,NFATC1,NOTCH1,PPARG,PRKCB,RAC1,SEMA4D,TLR4,VAV3,XIAP,YY1                                                                                                                                                                                                                                                                                                                                                                                                                                                                                                                                                                                                                                                                                                                                                                                                                                                               |
| 475 | Endometrium tumor                             | Cancer,Organismal Injury and Abnormalities,Reproductive System Disease           | 3.17E,05 | 129 | AASDHPPT,ACACB,ACADSB,ACBD7,ACY1,ALB,ALK,AOC3,APPL1,AR,ATP7B,B2M,B3GAT2,BCR,BTK,C8A,CA8,CD1A,CLCN5,CSDE1,CSF2RB,CSTF2,CTCF,CUL1,CYP7A1,DCTD,DHPS,DOK2,DPP4,DTYMK,EP300,EPHA3,ERBB4,ESR1,ETF1,FABP7,FAP,FCGR2A,FLNB,FN1,G6PD,GAD2,GRK2,GTF2I,HBB,HDAC7,HDX,HMBOX1,HMGB3,HPD,HSD17B4,HSP90AB1,HTR1A,IGF1R,IQUB,ITGB3,ITPKC,KIF11,LRBA,MAGEA4,MAGI2,MAP3K3,MAPK6,MARF1,MARK1,MDH1,MEMO1,MMP1,MMP2,MSH2,MSN,MYBPC3,MYSM1,NAE1,NBEA,NCBP1,NF2,NFATC1,NMRK1,NMT1,NOTCH1,NT5C3A,NUP214,OAT,PANK1,PARN,PARP3,PATJ,PDK3,PGK1,PPP2R1A,PTPRE,PTPRF,RARA,RARG,RBBP6,RBM39,RGS6,RND1,RUVBL1,SART3,SEN2,SF3B6,SH3YL1,SLC5A1,SLK,SMG5,SMTN,SMURF2,SNX1,STK4,SUB1,SULT1A1,SYT13,THBS2,TJP1,TLR4,TRIM21,UEVLD,UTRN,VAV3,WWP1,XIAP,YY1,ZEB2,ZFP28,ZIC3,ZNF292,ZNF462                                                                                                                                                                                                |
| 476 | Recurrent advanced non-small cell lung cancer | Cancer,Organismal Injury and Abnormalities,Respiratory Disease                   | 3.23E,05 | 6   | ALK,ERBB4,GART,HSP90AB1,PTK2B,RRM1                                                                                                                                                                                                                                                                                                                                                                                                                                                                                                                                                                                                                                                                                                                                                                                                                                                                                                                |
| 477 | Evans stage IVS neuroblastoma                 | Cancer,Neurological Disease,Organismal Injury and Abnormalities                  | 3.23E,05 | 6   | ALK,CSF2RB,FCGR2A,HSP90AB1,RARA,RARG                                                                                                                                                                                                                                                                                                                                                                                                                                                                                                                                                                                                                                                                                                                                                                                                                                                                                                              |
| 478 | Serous adenocarcinoma                         | Cancer,Organismal Injury and Abnormalities                                       | 3.27E,05 | 39  | ALB,ALK,AOC3,AR,ARF6,B2M,BCR,CA8,CSF2RB,CTCF,DPP4,EP300,EPHA3,F2,F3,GART,HBB,HCK,HSP90AB1,HTR1A,ITSN1,KIF11,MAGEA4,MAP3K3,MUC1,NF2,NOTCH1,NT5C3A,PARP3,PDK4,PGC,PPP2R1A,PYGL,RRM1,SKP1,SMTN,THBS2,TLR4,VAV3                                                                                                                                                                                                                                                                                                                                                                                                                                                                                                                                                                                                                                                                                                                                       |
| 479 | Formation of cytoskeleton                     | Cellular Assembly and Organization                                               | 3.28E,05 | 15  | AR,ARF6,F2,FCGR2A,FHIT,FN1,HCK,ITGB3,NF2,NFATC1,NOTCH1,PTK2B,RAC1,STK4,XIAP                                                                                                                                                                                                                                                                                                                                                                                                                                                                                                                                                                                                                                                                                                                                                                                                                                                                       |
| 480 | Advanced,stage chronic kidney disease         | Organismal Injury and Abnormalities,Renal and Urological Disease                 | 3.36E,05 | 9   | AR,F2,FCGR2A,IMPDH1,PPARG,PRKCB,SLC5A1,SMURF2,TTR                                                                                                                                                                                                                                                                                                                                                                                                                                                                                                                                                                                                                                                                                                                                                                                                                                                                                                 |
| 481 | Grade 3,4 glioma                              | Cancer,Neurological Disease,Organismal Injury and Abnormalities                  | 3.36E,05 | 151 | ACACB,ACADVL,ACVR2B,ADH7,ALB,ALK,ALOX12,AMY1C (includes others),APEX1,APPL1,ARHGAP5,ARHGEF1,ASAP1,ATP7B,ATXN3,B3GAT2,BMP1,BPL,C1R,C8A,CLCN5,CSD E1,CSF2RB,CSNK1G2,CSTF2,CTCF,CUL1,CYP2E1,DAPK2,DCXR,DGKA,DOK2,DPP4,DSG2,EP300,EPHA3,EP S8L2,ERBB4,ESR1,F2,FABP7,FAS,FCGR2A,FLNB,FN1,G6PD,GAD2,GALNT10,GART,GRK2,GRK6,GTF2I,H ADH,HASPIN,HDX,HIBCH,HLA,DRB1,HMBOX1,HMGCS1,HMOX1,HSD17B10,HSD17B4,HSP90AB1,IDE,IFN GR1,IGF1R,ITGB3,ITSN1,KMT5A,KYNU,LRBA,MAGI2,MAP3K3,MARF1,MATK,MSH2,MSN,MTAP,MUC1,M YBPC3,NBEA,NCBP1,NCOA3,NF2,NFATC1,NME3,NMT1,NOTCH1,NSUN5,NUP214,ODC1,OXSR1,PAFAH1B 2,PAH,PANK1,PAPSS1,PARN,PATJ,PC,PCYT2,PDHA1,PGC,PGK1,PHF24,POU2F1,PPARG,PPP2R1A,PSAP,PT K2B,PUS10,PYGL,RARA,RARG,RBBP6,RBM39,RBP5,RGS6,RRM1,RTN4IP1,SART3,SEMA4D,SEN2,SERPIN A5,SFMBT2,SH2B2,SH3YL1,SLC5A1,SLK,SMG5,SMURF2,SNX1,STARD13,SUB1,THBS2,TJP1,TLR4,TNFAIP 8L2,USP19,UTRN,VAV3,VPS26A,WEE1,WHRN,XRCC6,ZBTB43,ZCWPW1,ZEB2,ZFP28,ZIC3,ZNF292,ZNF462 |

|     |                                                     |                                                                       |          |     |                                                                                                                                                                                                                                                                                                                                                                                                                                                                                                                                                                                                                                                                                                                                                                                                                                                                                                                                                                                                                                                                                                                                                                                                                                                                                                                                                                                                                                                                                                                                                                          |
|-----|-----------------------------------------------------|-----------------------------------------------------------------------|----------|-----|--------------------------------------------------------------------------------------------------------------------------------------------------------------------------------------------------------------------------------------------------------------------------------------------------------------------------------------------------------------------------------------------------------------------------------------------------------------------------------------------------------------------------------------------------------------------------------------------------------------------------------------------------------------------------------------------------------------------------------------------------------------------------------------------------------------------------------------------------------------------------------------------------------------------------------------------------------------------------------------------------------------------------------------------------------------------------------------------------------------------------------------------------------------------------------------------------------------------------------------------------------------------------------------------------------------------------------------------------------------------------------------------------------------------------------------------------------------------------------------------------------------------------------------------------------------------------|
| 482 | Granuloma                                           | Inflammatory Disease, Organismal Injury and Abnormalities             | 3.39E,05 | 11  | AMY1C (includes others), G6PD, GRHPR, HBEGF, HLA, DRB1, IFNG, IFNGR1, IMPDH1, KLK1, PTPRE, TAF13                                                                                                                                                                                                                                                                                                                                                                                                                                                                                                                                                                                                                                                                                                                                                                                                                                                                                                                                                                                                                                                                                                                                                                                                                                                                                                                                                                                                                                                                         |
| 483 | Gastrointestinal adenocarcinoma                     | Cancer, Gastrointestinal Disease, Organismal Injury and Abnormalities | 3.57E,05 | 220 | ACACB, ACADSB, ACADVL, ACSM2A, ACVR2B, ACY1, ADH7, ALB, ALK, ALOX12, ANXA6, AOC3, APEX1, APPL1, AR, ARF6, ARHGAP5, ARHGEF1, ASAP1, ATP7B, ATXN3, B2M, B3GAT2, BCR, BMP1, BPI, BTK, BTRC, C1R, C8A, CAMK4, CANT1, CD1A, CD74, CDK5R1, CHKA, CLCN5, CSDE1, CSF2RB, CSNK1G1, CSNK1G2, CSTF2, CTCF, CUL1, CYP17A1, CYP2E1, CYP7A1, DAPK2, DCXR, DFFA, DGKA, DHPS, DMC1, DOK2, DPP4, DSG2, ECHS1, EP300, EPHA3, EPS8L2, ERBB4, ESR1, ETF1, EXOSC9, F2, F3, FAP, FAS, FHIT, FLNB, FN1, G6PD, GAD2, GALNT10, GART, GRHR, GRK2, GRK6, GTF2I, HADH, HASPIN, HCK, HDAC7, HDX, HIBCH, HK2, HLA, DRB1, HMGB3, HMOX1, HNRNPA2B1, HPD, HSCB, HSD17B10, HSD17B4, HSP90AB1, HTR1A, IDE, IFNGR1, IGF1R, IMPA2, IMPDH1, IQUB, ITGB3, ITPK1, ITPKC, ITSN1, KIF11, KMT5A, KYNU, LRBA, MAGEA4, MAGI2, MAP3K3, MAPK6, MARF1, MARK1, MATK, MECR, MMP2, MSH2, MSN, MTAP, MUC1, MYBPC1, MYBPC3, NAE1, NBEA, NCBP1, NCOA3, NF2, NFATC1, NMRK1, NMT1, NOTCH1, NSUN5, NT5C3A, NUP214, OAT, ODC1, OXSR1, PAFAH1B2, PAH, PANK1, PARN, PARP3, PATJ, PC, PCYT2, PDHA1, PDK2, PDK3, PDK4, PGC, PGK1, PHF24, POT1, POU2F1, PPARG, PPP2R1A, PRKCB, PTK2B, PTPRE, PTPRF, PUS10, PYGL, RAB26, RAC1, RARA, RARG, RBBP6, RBM39, RGS6, RND1, RRM1, RTN4IP1, RUVBL1, SART3, SEC23A, SEMA4D, SERPINA5, SF3B6, SFMBT2, SH2B2, SH3YL1, SKP1, SLC5A1, SLK, SMAP1, SMG5, SMG7, SMTN, SMURF2, SNX1, SPEF1, STARD13, STK16, SULT1A1, SYT13, THBS2, TJP1, TLR4, TRIM21, UEVLD, USP19, UTRN, VAV3, VEGFB, VPS26A, WHRN, WWP1, XRCC6, YWHAH, YY1, ZBTB43, ZCWPW1, ZEB2, ZFP28, ZIC3, ZNF292, ZNF462                         |
| 484 | Unresectable advanced non-small cell lung carcinoma | Cancer, Organismal Injury and Abnormalities, Respiratory Disease      | 3.59E,05 | 7   | ALK, ERBB4, GART, HSP90AB1, IGF1R, PARP3, PTK2B                                                                                                                                                                                                                                                                                                                                                                                                                                                                                                                                                                                                                                                                                                                                                                                                                                                                                                                                                                                                                                                                                                                                                                                                                                                                                                                                                                                                                                                                                                                          |
| 485 | Advanced squamous cell cancer                       | Cancer, Organismal Injury and Abnormalities                           | 3.59E,05 | 9   | ALK, ERBB4, F3, GART, HSP90AB1, IGF1R, PARP3, PTK2B, RRM1                                                                                                                                                                                                                                                                                                                                                                                                                                                                                                                                                                                                                                                                                                                                                                                                                                                                                                                                                                                                                                                                                                                                                                                                                                                                                                                                                                                                                                                                                                                |
| 486 | Stage IV metastatic solid tumor                     | Cancer, Organismal Injury and Abnormalities                           | 3.59E,05 | 9   | ALK, ERBB4, ESR1, GART, HSP90AB1, IGF1R, PARP3, PTK2B, RRM1                                                                                                                                                                                                                                                                                                                                                                                                                                                                                                                                                                                                                                                                                                                                                                                                                                                                                                                                                                                                                                                                                                                                                                                                                                                                                                                                                                                                                                                                                                              |
| 487 | Malignant neoplasm of large intestine               | Cancer, Gastrointestinal Disease, Organismal Injury and Abnormalities | 3.59E,05 | 223 | ACACB, ACADSB, ACADVL, ACSM2A, ACVR2B, ACY1, ADH7, ALB, ALK, ALOX12, ANXA6, AOC3, APEX1, APPL1, AR, ARF6, ARHGAP5, ARHGEF1, ASAP1, ATP7B, ATXN3, B2M, B3GAT2, BCR, BMP1, BPI, BTK, BTRC, C1R, C8A, CAMK4, CANT1, CD1A, CD74, CDK5R1, CHKA, CLCN5, CSDE1, CSF2RB, CSNK1G1, CSNK1G2, CSTF2, CTCF, CUL1, CYP17A1, CYP2E1, CYP7A1, DAPK2, DCXR, DFFA, DGKA, DHPS, DMC1, DOK2, DPP4, DSG2, ECHS1, EP300, EPHA3, EPS8L2, ERBB4, ESR1, ETF1, EXOSC9, F2, F3, FAP, FAS, FCGR2A, FHIT, FLNB, FN1, G6PD, GAD2, GALNT10, GART, GRHR, GRK2, GRK6, GTF2I, HADH, HASPIN, HCK, HDAC7, HDX, HIBCH, HK2, HLA, DRB1, HMGB3, HMOX1, HNRNPA2B1, HPD, HSCB, HSD17B10, HSD17B4, HSP90AB1, HTR1A, IDE, IFNG, IFNGR1, IGF1R, IMPA2, IMPDH1, IQUB, ITGB3, ITPK1, ITPKC, ITSN1, KIF11, KMT5A, KYNU, LRBA, MAGEA4, MAGI2, MAP3K3, MAPK6, MARF1, MARK1, MATK, MECR, MMP2, MSH2, MSN, MTAP, MUC1, MYBPC1, MYBPC3, NAE1, NBEA, NCBP1, NCOA3, NF2, NFATC1, NMRK1, NMT1, NOTCH1, NSUN5, NT5C3A, NUP214, OAT, ODC1, OXSR1, PAFAH1B2, PANK1, PAPSS1, PARN, PARP3, PATJ, PC, PCYT2, PDHA1, PDK2, PDK3, PDK4, PEX5, PGC, PGK1, PHF24, POT1, POU2F1, PPARG, PPP2R1A, PRKCB, PTK2B, PTPRF, PUS10, PYGL, RAB26, RAC1, RARA, RARG, RBBP6, RBM39, RGS6, RND1, RRM1, RTN4IP1, RUVBL1, SART3, SEC23A, SEMA4D, SERPINA5, SF3B6, SFMBT2, SH2B2, SH3YL1, SKP1, SLC5A1, SLK, SMAP1, SMG5, SMG7, SMTN, SMURF2, SNX1, SPEF1, STARD13, STK16, STK4, SYT13, TAF13, THBS2, TJP1, TLR4, TRIM21, TR, UEVLD, USP19, UTRN, VAV3, VEGFB, VPS26A, WHRN, WWP1, XRCC6, YWHAH, YY1, ZBTB43, ZCWPW1, ZEB2, ZFP28, ZIC3, ZNF292, ZNF462 |
| 488 | BRCA1 mutation positive cancer                      | Cancer, Organismal Injury and Abnormalities                           | 3.67E,05 | 6   | ESR1, GART, HSP90AB1, PARP3, RARG, RRM1                                                                                                                                                                                                                                                                                                                                                                                                                                                                                                                                                                                                                                                                                                                                                                                                                                                                                                                                                                                                                                                                                                                                                                                                                                                                                                                                                                                                                                                                                                                                  |
| 489 | Angioedema                                          | Dermatological Diseases and Conditions, Immunologic                   | 3.67E,05 | 6   | AR, C1R, DPP4, ESR1, G6PD, TLR4                                                                                                                                                                                                                                                                                                                                                                                                                                                                                                                                                                                                                                                                                                                                                                                                                                                                                                                                                                                                                                                                                                                                                                                                                                                                                                                                                                                                                                                                                                                                          |

|     |                                                              |                                                                                                    |          |     |                                                                                                                                                                                                                                                                                                                                                                                                                                                                                                                                                                                                                                                                                                                                                                                                                                                                                                                                                                                                                                                                                                                                                                                                                                                                                                           |
|-----|--------------------------------------------------------------|----------------------------------------------------------------------------------------------------|----------|-----|-----------------------------------------------------------------------------------------------------------------------------------------------------------------------------------------------------------------------------------------------------------------------------------------------------------------------------------------------------------------------------------------------------------------------------------------------------------------------------------------------------------------------------------------------------------------------------------------------------------------------------------------------------------------------------------------------------------------------------------------------------------------------------------------------------------------------------------------------------------------------------------------------------------------------------------------------------------------------------------------------------------------------------------------------------------------------------------------------------------------------------------------------------------------------------------------------------------------------------------------------------------------------------------------------------------|
|     |                                                              | al Disease,Organismal Injury and Abnormalities                                                     |          |     |                                                                                                                                                                                                                                                                                                                                                                                                                                                                                                                                                                                                                                                                                                                                                                                                                                                                                                                                                                                                                                                                                                                                                                                                                                                                                                           |
| 490 | BRCA1 mutation positive solid tumor                          | Cancer,Organismal Injury and Abnormalities                                                         | 3.67E,05 | 6   | ESR1,GART,HSP90AB1,PARP3,RARG,RRM1                                                                                                                                                                                                                                                                                                                                                                                                                                                                                                                                                                                                                                                                                                                                                                                                                                                                                                                                                                                                                                                                                                                                                                                                                                                                        |
| 491 | Cell transformation                                          | Cancer                                                                                             | 3.68E,05 | 13  | ARF6,CHKA,EP300,ERBB4,HNRNPA2B1,IGF1R,MATK,NCOA3,NOTCH1,ODC1,RAC1,SFN,STARD13                                                                                                                                                                                                                                                                                                                                                                                                                                                                                                                                                                                                                                                                                                                                                                                                                                                                                                                                                                                                                                                                                                                                                                                                                             |
| 492 | Smooth muscle tumor                                          | Cancer,Organismal Injury and Abnormalities,Skeletal and Muscular Disorders                         | 3.70E,05 | 18  | AR,CLCN5,ERBB4,ESR1,FAS,FN1,HSD17B10,HSP90AB1,IGF1R,MDH1,MMP2,PK4,PPARG,RRM1,S100A6,TAF13,UTRN,WEE1                                                                                                                                                                                                                                                                                                                                                                                                                                                                                                                                                                                                                                                                                                                                                                                                                                                                                                                                                                                                                                                                                                                                                                                                       |
| 493 | Synthesis of steroid                                         | Lipid Metabolism,Small Molecule Biochemistry,Vitamin and Mineral Metabolism                        | 3.76E,05 | 12  | ACACB,ACAT2,ALOX12,CYP17A1,CYP2R1,CYP7A1,G6PD,GGPS1,HMGCS1,HSD17B10,HSD17B4,IFNG                                                                                                                                                                                                                                                                                                                                                                                                                                                                                                                                                                                                                                                                                                                                                                                                                                                                                                                                                                                                                                                                                                                                                                                                                          |
| 494 | Glioblastoma                                                 | Cancer,Neurological Disease,Organismal Injury and Abnormalities                                    | 3.77E,05 | 22  | CSF2RB,EP300,EPHA3,ERBB4,FABP7,FN1,GART,HNRNPA2B1,HSP90AB1,IDE,IFNG,ITGB3,MSH2,NBEA,PA2G4,PRKCB,RAC1,RRM1,TAF13,TLR4,VAV3,ZEB2                                                                                                                                                                                                                                                                                                                                                                                                                                                                                                                                                                                                                                                                                                                                                                                                                                                                                                                                                                                                                                                                                                                                                                            |
| 495 | Advanced breast cancer                                       | Cancer,Organismal Injury and Abnormalities,Reproductive System Disease                             | 3.79E,05 | 10  | ALK,AR,CYP17A1,ERBB4,ESR1,GGPS1,HSP90AB1,MUC1,PARP3,RRM1                                                                                                                                                                                                                                                                                                                                                                                                                                                                                                                                                                                                                                                                                                                                                                                                                                                                                                                                                                                                                                                                                                                                                                                                                                                  |
| 496 | Alzheimer disease                                            | Metabolic Disease,Neurological Disease,Organismal Injury and Abnormalities,Psychological Disorders | 3.81E,05 | 28  | ALB,AR,C1R,CD74,CDK5R1,ESR1,F3,FCGR2A,GAD2,GC,GGPS1,HMOX1,HNRNPA2B1,HTR1A,IDE,MMP1,MMP2,NAE1,NOTCH1,PPARG,PRKCB,PSAP,PTPRE,SMTN,TAF13,TLR4,TTR,XIAP                                                                                                                                                                                                                                                                                                                                                                                                                                                                                                                                                                                                                                                                                                                                                                                                                                                                                                                                                                                                                                                                                                                                                       |
| 497 | EGFR or ROS1 mutation positive non,small cell lung carcinoma | Cancer,Organismal Injury and Abnormalities,Respiratory Disease                                     | 3.82E,05 | 8   | ALK,ERBB4,GART,HSP90AB1,IGF1R,MUC1,PTK2B,SFN                                                                                                                                                                                                                                                                                                                                                                                                                                                                                                                                                                                                                                                                                                                                                                                                                                                                                                                                                                                                                                                                                                                                                                                                                                                              |
| 498 | Metastatic squamous cell lung cancer                         | Cancer,Organismal Injury and Abnormalities,Respiratory Disease                                     | 3.82E,05 | 8   | ALK,ERBB4,GART,HSP90AB1,IGF1R,PARP3,PTK2B,RRM1                                                                                                                                                                                                                                                                                                                                                                                                                                                                                                                                                                                                                                                                                                                                                                                                                                                                                                                                                                                                                                                                                                                                                                                                                                                            |
| 499 | Gastrointestinal tract cancer                                | Cancer,Gastrointestinal Disease,Organismal Injury and Abnormalities                                | 3.87E,05 | 235 | ACACB,ACADSB,ACADVL,ACSM2A,ACVR2B,ACY1,ADH7,ALB,ALK,ALOX12,ANXA6,AOC3,APEX1,APPL1,AR,ARF6,ARHGAP5,ARHGEF1,ASAP1,ATP7B,ATXN3,B2M,B3GAT2,BCR,BMP1,BPI,BTK,BTRC,C1R,C8A,CAMK4,CANT1,CD1A,CD74,CDK5R1,CHKA,CLCN5,CSDE1,CSF2RB,CSNK1G1,CSNK1G2,CSTF2,CTCF,CUL1,CYP17A1,CYP2E1,CYP2R1,CYP7A1,DAPK2,DCXR,DFFA,DGKA,DHPS,DMC1,DOK2,DPP4,DSG2,ECHS1,EP300,EPHA3,EP8L2,ERBB4,ESR1,ETF1,EXOSC9,F2,F3,FABP7,FAP,FAS,FCGR2A,FHIT,FLNB,FN1,G6PD,GAD2,GALM,GALNT10,GART,GRHPR,GRK2,GRK6,GTF21,HADH,HASPIN,HBB,HCK,HDAC7,HDX,HIBCH,HK2,HLA,DRB1,HMGB3,HMOX1,HNRNPA2B1,HPD,HSCB,HSD17B10,HSD17B4,HSP90AB1,HTR1A,IDE,IFNG,IFNGR1,IGF1R,IMPA2,IMPDH1,IQUB,ITGB3,ITPK1,ITPKC,ITSN1,KIF11,KLK1,KMT5A,KYNU,LRBA,MAGEA4,MAGI2,MAP3K3,MAPK6,MARF1,MARK1,MATK,MECR,MMP2,MSH2,MSN,MTAP,MUC1,MYBPC1,MYBPC3,NAE1,NBEA,NCBP1,NCOA3,NF2,NFATC1,NMRK1,NMT1,NOTCH1,NSUN5,NT5C3A,NUP214,OAT,ODC1,OXSR1,PA2G4,PAFAH1B2,PAH,PANK1,PAPSS1,PARN,PARP3,PATJ,PC,PCYT2,PDHA1,PK2,PK3,PK4,PEX5,PGC,PGK1,PHF24,POT1,POU2F1,PPARG,PPP2R1A,PRKCB,PTK2B,PTPRE,PTPRF,PUS10,PYGL,RAB26,RAC1,RARA,RARG,RBBP6,RBM39,RGS6,RND1,RRM1,RTN4IP1,RUVBL1,SART3,SEC23A,SEMA4D,SERPINA5,SF3B6,SFMBT2,SFN,SH2B2,SH3YL1,SKP1,SLC5A1,SLK,SMAP1,SMG5,SMG7,SMTN,SMURF2,SNX1,SPEF1,STARD13,STK16,STK4,SULT1A1,SYT13,TAF13,THBS2,TJP1,TLR4,TRIM21,TTR,UEVLD,USP19,UTRN,VAV |

|     |                      |                                             |          |    |                                                                                                                                                                                                                                                                          |
|-----|----------------------|---------------------------------------------|----------|----|--------------------------------------------------------------------------------------------------------------------------------------------------------------------------------------------------------------------------------------------------------------------------|
|     |                      |                                             |          |    | 3, VEGFB, VPS26A, WEE1, WHRN, WWP1, XRCC6, YWHAH, YY1, ZBTB43, ZCWPW1, ZEB2, ZFP28, ZIC3, ZNF292, ZNF462                                                                                                                                                                 |
| 500 | Mixed cell carcinoma | Cancer, Organismal Injury and Abnormalities | 3.99E,05 | 39 | ALK, AR, ARHGEF1, ASAP1, CLK1, CSNK1G1, CSTF2, DPP4, EPHA3, ERBB4, F3, GART, HBEGF, HNRNPA2B1, HSP90AB1, ITPA, MAGI2, NBEA, NCOA3, NF2, NR1I3, ODC1, PARP3, PC, PDK4, POU2F1, PPARG, PPP2R1A, PTPRF, RBM39, RRM1, RTN4IP1, SFMBT2, SH3YL1, SMTN, SYT13, UTRN, WWP1, ZEB2 |

**Supplementary Table S4: Upstream analysis by IPA for solasonine.** The upstream analysis by IPA was performed to predict the upstream regulatory factors for potential target genes of solasonine. The prediction of upstream regulators were sorted by increasing of p-value (p-value  $\leq 0.05$ ).

| Upstream Regulator | Molecule Type                     | p-value  | Target Molecules in Dataset of Solasonine Related Genes                                                           |
|--------------------|-----------------------------------|----------|-------------------------------------------------------------------------------------------------------------------|
| ERK                | group                             | 2.85E-07 | CDK5R1,ESR1,FAS,HBEGF,IFNG,ITGB3,MMP1,MMP2,MUC1,ODC1,PDK4                                                         |
| EGFR               | kinase                            | 3.98E-06 | AR,ESR1,F3,HK2,HNRNPA2B1,IFNG,MMP1,PTPRE,XIAP,ZEB2                                                                |
| ERK1/2             | group                             | 4.67E-06 | B2M,CYP17A1,CYP7A1,ESR1,FN1,HBEGF,HK2,IGF1R,MMP1,MMP2,PTPRE                                                       |
| TNF                | cytokine                          | 8.89E-06 | CD74,CYP17A1,DPP4,F3,FAS,FN1,HBEGF,HMOX1,IFNGR1,ITGB3,KYNU,MMP1,MMP2,MSH2,MUC1,NFATC1,NOTCH1,PPARG,TJP1,TLR4,XIAP |
| PCGEM1             | other                             | 2.58E-05 | CANT1,G6PD,HK2,PDHA1,PDK4,PGK1                                                                                    |
| mir-122            | microRNA                          | 3.13E-05 | CTCF,CYP7A1,G6PD,GALNT10,IGF1R,MAP3K3,MARK1,SEMA4D,VAV3,WARS1,YARS1                                               |
| let-7              | microRNA                          | 3.51E-05 | AR,FN1,HK2,IGF1R,ITGB3,MAPK6,PA2G4,STARD13,TLR4                                                                   |
| SIRT1              | transcription regulator           | 3.61E-05 | EP300,FN1,HMOX1,MMP2,NMRK1,PDK4,RAC1                                                                              |
| TWIST1             | transcription regulator           | 4.98E-05 | AR,FAS,FN1,MMP1,MMP2,ZEB2                                                                                         |
| WAC                | other                             | 5.41E-05 | G6PD,PDK4,PPARG                                                                                                   |
| SP1                | transcription regulator           | 5.43E-05 | AR,CYP17A1,ESR1,FN1,HBB,HBEGF,HK2,HMOX1,IFNGR1,IGF1R,ITGB3,MMP2,RARA,ZEB2                                         |
| IFNG               | cytokine                          | 6.23E-05 | CAMK4,DPP4,FAS,GART,GRK2,IFNG,ITGB3,MMP1,MMP2,MUC1,PPARG,SERPINA5,SMTN,TJP1,TLR4,ZEB2                             |
| BMP7               | growth factor                     | 7.68E-05 | BMP1,ESR1,FN1,IGF1R,MMP2,MSN,ZEB2                                                                                 |
| BACH1              | transcription regulator           | 7.97E-05 | HMOX1,MMP1,NDUFAB1,PDK2,PDK3,PDK4                                                                                 |
| TGFB1              | growth factor                     | 8.05E-05 | ALB,BMP1,F3,FAP,FAS,FN1,HBEGF,HMOX1,IFNG,ITGB3,MMP1,MMP2,NDC80,SMTN,SMURF2,ZEB2                                   |
| P38 MAPK           | group                             | 8.18E-05 | DGKA,F3,FAS,FN1,HMOX1,ITGB3,MMP1,MMP2,MSH2,RARA                                                                   |
| CG                 | complex                           | 1.30E-04 | ACP3,AR,C1R,FAS,HK2,IFNGR1,ITGB3,MMP1,MMP2,SMURF2,XIAP                                                            |
| RNF40              | enzyme                            | 1.48E-04 | G6PD,PDK4,PPARG                                                                                                   |
| NFkB (complex)     | complex                           | 1.95E-04 | CTCF,F3,FAS,HMOX1,IFNG,KYNU,MMP1,MMP2,MSH2,NOTCH1,SEN2,XIAP                                                       |
| E2F1               | transcription regulator           | 2.00E-04 | AR,EXOSC9,FAS,MSH2,NCOA3,NDC80,NOTCH1,PA2G4,RPA3,RRM1,VEGFB                                                       |
| ESRRG              | ligand-dependent nuclear receptor | 2.11E-04 | HK2,KLK1,MDH1,PDHA1,PDK4                                                                                          |
| JNK                | group                             | 2.68E-04 | BTRC,IFNG,MMP1,MMP2,MSH2,RARA,XIAP                                                                                |
| VEGFA              | growth factor                     | 3.02E-04 | CD1A,F3,ITGB3,MMP2,NOTCH1                                                                                         |
| MBD2               | transcription regulator           | 3.02E-04 | DPP4,ESR1,G6PD,MMP2,XIAP                                                                                          |
| DEF6               | other                             | 3.11E-04 | FN1,MMP2,ZEB2                                                                                                     |

|                                       |                         |          |                                                                                                                 |
|---------------------------------------|-------------------------|----------|-----------------------------------------------------------------------------------------------------------------|
| Akt                                   | group                   | 3.29E-04 | F3,IGF1R,MMP2,MUC1,NOTCH1,PKD4,TJP1                                                                             |
| SFN                                   | other                   | 3.32E-04 | DSG2,F3,PKD4,TJP1                                                                                               |
| TP63                                  | transcription regulator | 3.36E-04 | F3,FAS,FN1,G6PD,HBEGF,HK2,NOTCH1,SFN,SMURF2,THBS2,WEE1,ZEB2                                                     |
| ERBB2                                 | kinase                  | 3.77E-04 | AR,BMP1,ERBB4,F3,FN1,GART,IFNG,MMP1,MUC1,NDC80,PGK1,PPARG,PTPRF,RRM1,SMTN                                       |
| TCR                                   | complex                 | 3.90E-04 | ALOX12,ARHGEF1,HADH,HSD17B10,IFNG,MARF1,MDH1,ODC1,PA2G4,PGK1,TLR4                                               |
| IKBKE                                 | kinase                  | 4.18E-04 | PDHA1,PKD3,PKD4,PGK1,PYGL                                                                                       |
| GPI                                   | enzyme                  | 4.23E-04 | FN1,RAC1,ZEB2                                                                                                   |
| PAX3-FOXO1                            | fusion gene/product     | 4.83E-04 | ALK,CLCN5,HMOX1,IGF1R,IMPA2,PPP2R1A,XRCC6                                                                       |
| EGR1                                  | transcription regulator | 5.13E-04 | CDK5R1,F3,FN1,HBEGF,PPARG                                                                                       |
| TAL1                                  | transcription regulator | 5.35E-04 | CD1A,DSG2,HBB,HMGB3,LRBA,MUC1,NOTCH1,PTK2B,XRCC6,YARS1                                                          |
| RFX5                                  | transcription regulator | 5.59E-04 | B2M,CD74,HLA-DRB1                                                                                               |
| miR-615-3p (miRNAs<br>w/seed CCGAGCC) | mature microRNA         | 5.91E-04 | AR,PPARG                                                                                                        |
| mir-17                                | microRNA                | 6.12E-04 | AR,ESR1,FAS,NCOA3                                                                                               |
| mir-322                               | microRNA                | 7.19E-04 | FN1,IGF1R,SMURF2                                                                                                |
| OLR1                                  | transmembrane receptor  | 7.19E-04 | MMP1,RARA,RARG                                                                                                  |
| JUN                                   | transcription regulator | 7.83E-04 | ALOX12,FN1,HK2,HMOX1,IFNG,MMP1,MMP2,VAV3,ZEB2                                                                   |
| mir-15                                | microRNA                | 8.01E-04 | AR,BTRC,IFNG,WEE1                                                                                               |
| PRKAA1                                | kinase                  | 8.21E-04 | EPHA3,FN1,IGF1R,MAGEA4,TJP1                                                                                     |
| WT1                                   | transcription regulator | 9.63E-04 | BTK,ESR1,HBEGF,IGF1R,ODC1,TRIM21,WARS1                                                                          |
| CCND1                                 | transcription regulator | 1.01E-03 | AR,ERI1,ITGB3,KIF11,MAGI2,NCOA3,PAH,UTRN,ZFP28,ZNF462                                                           |
| IL1B                                  | cytokine                | 1.09E-03 | ACP3,BTRC,CYP7A1,DPP4,F3,FAS,IFNG,MMP1,MUC1,PPARG,TLR4                                                          |
| TP53                                  | transcription regulator | 1.10E-03 | AR,DGKA,ESR1,FAS,FN1,GART,HK2,HMGCS1,HMOX1,IGF1R,MMP2,MSH2,NDC80,NOTCH1,PANK1,PRKCB,RBBP6,SFN,SMURF2,TJP1,YWHAH |
| SREBF2                                | transcription regulator | 1.12E-03 | FABP7,GTF2I,PPARG                                                                                               |
| RELA                                  | transcription regulator | 1.16E-03 | B2M,CERT1,CTCF,FAS,FN1,IFNG,MMP1,PPARG,STK4,XIAP                                                                |
| MOAP1                                 | other                   | 1.17E-03 | G6PD,HMOX1                                                                                                      |
| mir-192                               | microRNA                | 1.17E-03 | IGF1R,ZEB2                                                                                                      |
| mir-503                               | microRNA                | 1.17E-03 | IGF1R,SMURF2                                                                                                    |
| DYSF                                  | other                   | 1.17E-03 | FN1,ITGB3                                                                                                       |
| CDK19                                 | kinase                  | 1.25E-03 | DCXR,FAS,HBEGF,HMGCS1,HMOX1,NOTCH1,SFN                                                                          |
| IL15                                  | cytokine                | 1.25E-03 | G6PD,GALM,HK2,HMOX1,IFNG,IGF1R,PGK1                                                                             |

|         |                                   |          |                                           |
|---------|-----------------------------------|----------|-------------------------------------------|
| RXRA    | ligand-dependent nuclear receptor | 1.35E-03 | CYP7A1,HMOX1,PPARG,RARA,RARG              |
| ITGAV   | transmembrane receptor            | 1.36E-03 | ITGB3,MMP1,MMP2                           |
| ITGB3   | transmembrane receptor            | 1.36E-03 | ITGB3,MMP1,MMP2                           |
| WNT5A   | cytokine                          | 1.38E-03 | FN1,HMOX1,ITGB3,MMP1,SEMA4D,TLR4          |
| PRMT1   | enzyme                            | 1.45E-03 | ALOX12,FN1,PK4,ZEB2                       |
| HRAS    | enzyme                            | 1.57E-03 | DTYMK,FAS,HMOX1,PRKCB,RRM1                |
| MTOR    | kinase                            | 1.65E-03 | ACACB,AR,CHKA,HK2,IFNG,MUC1               |
| IGF1    | growth factor                     | 1.70E-03 | F3,FN1,IGF1R,SFN,XIAP                     |
| PKM     | kinase                            | 1.70E-03 | HK2,MMP2,PC,PDHA1,PK4                     |
| HNF4A   | transcription regulator           | 1.74E-03 | CYP7A1,MSN,NR1H3,PPARG,RARA,RARG          |
| c-Src   | group                             | 1.93E-03 | CYP7A1,HMOX1                              |
| KIF26A  | other                             | 1.93E-03 | RAC1,VAV3                                 |
| PRKCB   | kinase                            | 1.93E-03 | FN1,MMP2                                  |
| SENP2   | peptidase                         | 1.93E-03 | HK2,PGK1                                  |
| ICAM1   | transmembrane receptor            | 1.95E-03 | IFNG,NOTCH1,ZEB2                          |
| CSF3    | cytokine                          | 1.95E-03 | PPARG,PRKCB,RARA                          |
| MMP2    | peptidase                         | 1.95E-03 | CSF2RB,PPP2R1A,TJP1                       |
| PCGF2   | transcription regulator           | 1.95E-03 | FN1,NOTCH1,ZEB2                           |
| SMAD2   | transcription regulator           | 1.97E-03 | FN1,MMP2,RAC1,XIAP                        |
| GATA3   | transcription regulator           | 1.97E-03 | ECHS1,ESR1,IFNG,TJP1                      |
| EPO     | cytokine                          | 2.29E-03 | MMP2,PRKCB,TJP1                           |
| COL18A1 | other                             | 2.41E-03 | F3,FN1,ITGB3,MMP1,MMP2                    |
| PGR     | ligand-dependent nuclear receptor | 2.64E-03 | ESR1,F3,FN1,HBEGF,MATK,MUC1,PNMT,SERPINA5 |
| LGALS1  | other                             | 2.66E-03 | FN1,IFNGR1,MMP1                           |
| CXCL8   | cytokine                          | 2.86E-03 | AR,CD74,MMP2,RAC1                         |
| FGF2    | growth factor                     | 2.86E-03 | F3,HK2,MMP1,PPARG                         |
| NCF1    | enzyme                            | 2.87E-03 | F3,FN1                                    |
| mir-548 | microRNA                          | 2.87E-03 | AR,MMP2                                   |
| AXL     | kinase                            | 2.87E-03 | MMP1,MMP2                                 |
| PTBP3   | other                             | 2.87E-03 | FN1,ZEB2                                  |
| COMMD1  | transporter                       | 2.87E-03 | ATP7B,IFNG                                |

|                                                    |                                      |          |                                                 |
|----------------------------------------------------|--------------------------------------|----------|-------------------------------------------------|
| NFIC                                               | transcription regulator              | 2.87E-03 | CYP17A1,FABP7                                   |
| PI3K (complex)                                     | complex                              | 2.92E-03 | CDK5R1,HBEGF,IGF1R,NOTCH1,TLR4                  |
| Lh                                                 | complex                              | 3.00E-03 | ACP3,AR,HK2,MAPK6,MMP2,PGK1,PPP2R1A,PTPRE,PTPRF |
| IRF8                                               | transcription regulator              | 3.07E-03 | B2M,CD74,TLR4                                   |
| CDK4                                               | kinase                               | 3.11E-03 | ERI1,KIF11,MAGI2,PAH,UTRN,ZFP28,ZNF462          |
| CDH1                                               | other                                | 3.12E-03 | ERBB4,FN1,MMP1,XIAP                             |
| SPP1                                               | cytokine                             | 3.31E-03 | FN1,IFNG,MECR,MMP2,PPARG                        |
| RNA polymerase II                                  | complex                              | 3.38E-03 | B2M,CYP7A1,ESR1,HBB,MMP2,NCOA3,SFN              |
| EBI3                                               | cytokine                             | 3.52E-03 | B2M,FAS,NFATC1                                  |
| JUNB                                               | transcription regulator              | 3.69E-03 | FN1,HK2,HMOX1,MMP1                              |
| Mmp                                                | group                                | 3.99E-03 | FAS,TJP1                                        |
| KLF17                                              | transcription regulator              | 3.99E-03 | FN1,TJP1                                        |
| MIA                                                | other                                | 3.99E-03 | FN1,ITGB3                                       |
| LOXL2                                              | enzyme                               | 3.99E-03 | ESR1,FN1                                        |
| miR-491-5p (and<br>other miRNAs w/seed<br>GUGGGGA) | mature microRNA                      | 3.99E-03 | AR,MMP2                                         |
| BANCR                                              | other                                | 3.99E-03 | MMP1,MMP2                                       |
| OCN                                                | other                                | 3.99E-03 | MMP1,MMP2                                       |
| mir-24                                             | microRNA                             | 3.99E-03 | IFNG,PSAP                                       |
| NR1D1                                              | ligand-dependent nuclear<br>receptor | 3.99E-03 | MDH1,TLR4                                       |
| mir-19                                             | microRNA                             | 4.01E-03 | ESR1,F3,PSAP                                    |
| CCN2                                               | growth factor                        | 4.01E-03 | ESR1,FN1,MMP2                                   |
| RUNX1                                              | transcription regulator              | 4.32E-03 | ALB,ALOX12,EP300,ITGB3                          |
| CDK9                                               | kinase                               | 4.53E-03 | G6PD,PDK4,PPARG                                 |
| mir-181                                            | microRNA                             | 4.53E-03 | AR,IFNG,NOTCH1                                  |
| ANXA2                                              | other                                | 5.10E-03 | ANG,FAS,MMP1                                    |
| CSF2                                               | cytokine                             | 5.18E-03 | CD1A,CSF2RB,MMP1,RARA,TLR4,XIAP                 |
| CD4                                                | transmembrane receptor               | 5.27E-03 | F3,IFNG                                         |
| DDR2                                               | kinase                               | 5.27E-03 | MMP1,MMP2                                       |
| ERP29                                              | transporter                          | 5.27E-03 | TJP1,ZEB2                                       |
| ERBB4                                              | kinase                               | 5.27E-03 | ERBB4,PGK1                                      |



|                                                   |                                      |          |                                                                     |
|---------------------------------------------------|--------------------------------------|----------|---------------------------------------------------------------------|
| XBP1                                              | transcription regulator              | 5.40E-03 | ESR1,NCOA3,S100A6,XRCC6                                             |
| SMARCA4                                           | transcription regulator              | 5.53E-03 | CD74,CLK1,F3,FAS,FCGR2A,FLNB,FN1,HBB,IFNG,MMP1,MMP2,MUC1,S100A6,YY1 |
| TRIM37                                            | enzyme                               | 5.71E-03 | CUL1,PEX5,SFN                                                       |
| F7                                                | peptidase                            | 5.71E-03 | AR,F3,HBEGF                                                         |
| UPF1                                              | enzyme                               | 5.71E-03 | HBB,SMG5,SMG7                                                       |
| Hsp90                                             | group                                | 5.79E-03 | AR,ESR1,GRK6,IFNG                                                   |
| TRPS1                                             | transcription regulator              | 6.35E-03 | FN1,KIF11,MMP2                                                      |
| HIF1A                                             | transcription regulator              | 6.58E-03 | CHKA,ERBB4,FN1,HK2,IFNG,ITGB3,MMP2,MUC1,NAE1                        |
| BMI1                                              | transcription regulator              | 6.64E-03 | CUL1,FAS,HK2,SFN                                                    |
| FZD8                                              | G-protein coupled receptor           | 6.71E-03 | FN1,TJP1                                                            |
| E2F5                                              | transcription regulator              | 6.71E-03 | PA2G4,VEGFB                                                         |
| TPM3                                              | other                                | 6.71E-03 | MMP1,MMP2                                                           |
| mir-132                                           | microRNA                             | 6.71E-03 | EP300,IFNG                                                          |
| mir-634                                           | microRNA                             | 6.71E-03 | AR,XIAP                                                             |
| ETV1                                              | transcription regulator              | 6.71E-03 | ITGB3,MMP1                                                          |
| MCAM                                              | other                                | 6.71E-03 | FN1,MMP2                                                            |
| VTN                                               | other                                | 6.71E-03 | F3,SFN                                                              |
| NPC1                                              | transporter                          | 8.31E-03 | HDAC7,TLR4                                                          |
| DCLK1                                             | kinase                               | 8.31E-03 | NOTCH1,ZEB2                                                         |
| RASSF1                                            | other                                | 8.31E-03 | ESR1,MMP2                                                           |
| miR-7a-5p (and other<br>miRNAs w/seed<br>GGAAGAC) | mature microRNA                      | 8.31E-03 | IGF1R,KMT5A                                                         |
| SRSF1                                             | other                                | 8.31E-03 | FN1,RAC1                                                            |
| AKT2                                              | kinase                               | 8.31E-03 | ESR1,RAC1                                                           |
| GFI1B                                             | transcription regulator              | 8.31E-03 | CSDE1,ITSN1                                                         |
| CSF1                                              | cytokine                             | 8.55E-03 | FAS,FN1,NFATC1                                                      |
| ESR2                                              | ligand-dependent nuclear<br>receptor | 8.60E-03 | FN1,IGF1R,MMP1,RARA,VAV3                                            |
| Gsk3                                              | group                                | 9.37E-03 | ESR1,IGF1R,XIAP                                                     |
| DLX6-AS1                                          | other                                | 1.01E-02 | NOTCH1,WEE1                                                         |
| IDH2                                              | enzyme                               | 1.01E-02 | FN1,ZEB2                                                            |
| NRBP2                                             | kinase                               | 1.01E-02 | EP300,NOTCH1                                                        |

|                                              |                                   |          |                                          |
|----------------------------------------------|-----------------------------------|----------|------------------------------------------|
| IGFBP5                                       | other                             | 1.01E-02 | F3,SFN                                   |
| CD209                                        | other                             | 1.01E-02 | MMP2,TJP1                                |
| LINC-ROR                                     | other                             | 1.01E-02 | FAS,NOTCH1                               |
| FABP2                                        | transporter                       | 1.01E-02 | ACACB,PPARG                              |
| DDX3X                                        | enzyme                            | 1.01E-02 | AR,RAC1                                  |
| POSTN                                        | other                             | 1.01E-02 | MMP2,VEGFB                               |
| ECM1                                         | transporter                       | 1.01E-02 | MUC1,ZEB2                                |
| HEIH                                         | other                             | 1.02E-02 | FAS,MMP2,VEGFB                           |
| CCN1                                         | other                             | 1.02E-02 | FN1,ITGB3,SENP2                          |
| NEUROG1                                      | transcription regulator           | 1.02E-02 | FABP3,FAP,FN1,ITGB3                      |
| EGLN                                         | group                             | 1.12E-02 | HK2,PDK3,PYGL,SH2B2,ZNF292               |
| BCOR                                         | transcription regulator           | 1.20E-02 | CD74,TLR4                                |
| PLK1                                         | kinase                            | 1.20E-02 | ESR1,SFN                                 |
| NR6A1                                        | ligand-dependent nuclear receptor | 1.20E-02 | BMP1,TLR4                                |
| IL3                                          | cytokine                          | 1.21E-02 | CD1A,FCGR2A,MMP1                         |
| miR-145-5p (and other miRNAs w/seed UCCAGUU) | mature microRNA                   | 1.21E-02 | DFFA,MMP1,MUC1                           |
| BRAF                                         | kinase                            | 1.21E-02 | BTRC,MMP1,XIAP                           |
| IL27                                         | cytokine                          | 1.21E-02 | B2M,FAS,IFNG,NFATC1                      |
| STAT3                                        | transcription regulator           | 1.26E-02 | ESR1,FN1,HK2,HMOX1,MMP2,MUC1,NOTCH1,PGK1 |
| POU5F1                                       | transcription regulator           | 1.29E-02 | DFFA,FAS,IGF1R,MMP2,WEE1,ZEB2            |
| WWTR1                                        | transcription regulator           | 1.31E-02 | DTYMK,FN1,RRM1                           |
| IGF1R                                        | transmembrane receptor            | 1.31E-02 | ESR1,IGF1R,RAC1                          |
| TCF12                                        | transcription regulator           | 1.31E-02 | FN1,LRBA,XRCC6                           |
| MYCN                                         | transcription regulator           | 1.31E-02 | APEX1,HK2,PA2G4                          |
| CDKN1A                                       | kinase                            | 1.35E-02 | FN1,MMP1,PSAP,RRM1                       |
| IL18                                         | cytokine                          | 1.35E-02 | FAS,IFNG,MMP1,TLR4                       |
| SAA                                          | group                             | 1.40E-02 | F3,MMP1                                  |
| MDGA2                                        | other                             | 1.40E-02 | FAS,MSH2                                 |
| MED16                                        | transcription regulator           | 1.40E-02 | MMP1,MMP2                                |
| APOA1                                        | transporter                       | 1.40E-02 | CHKA,TLR4                                |

|                                    |                         |          |          |
|------------------------------------|-------------------------|----------|----------|
| MS4A1                              | other                   | 1.40E-02 | HK2,XIAP |
| IL7                                | cytokine                | 1.40E-02 | FAS,IFNG |
| Dgk                                | group                   | 1.41E-02 | CYP17A1  |
| Pdgf (complex)                     | complex                 | 1.41E-02 | MMP1     |
| ATP synthase                       | complex                 | 1.41E-02 | IFNG     |
| DIS3L2                             | enzyme                  | 1.41E-02 | RAC1     |
| BLVRA                              | enzyme                  | 1.41E-02 | CERT1    |
| FBXL17                             | other                   | 1.41E-02 | HMOX1    |
| PROM1                              | other                   | 1.41E-02 | DSG2     |
| S100A3                             | transporter             | 1.41E-02 | RARA     |
| RBMY1A1 (includes others)          | other                   | 1.41E-02 | AR       |
| VPS36                              | other                   | 1.41E-02 | ESR1     |
| USP12                              | peptidase               | 1.41E-02 | AR       |
| LAYN                               | other                   | 1.41E-02 | IFNG     |
| PABIR1                             | other                   | 1.41E-02 | WEE1     |
| LECT2                              | other                   | 1.41E-02 | PPARG    |
| SMG6                               | enzyme                  | 1.41E-02 | HBB      |
| S100A14                            | other                   | 1.41E-02 | MMP2     |
| KIR                                | group                   | 1.41E-02 | IFNG     |
| XDH                                | enzyme                  | 1.41E-02 | F3       |
| SELL                               | transmembrane receptor  | 1.41E-02 | IFNG     |
| CD6                                | transmembrane receptor  | 1.41E-02 | IFNG     |
| HLTF                               | transcription regulator | 1.41E-02 | HBB      |
| CGB3 (includes others)             | other                   | 1.41E-02 | MMP2     |
| IFNGR1                             | transmembrane receptor  | 1.41E-02 | FAS      |
| GNB5                               | enzyme                  | 1.41E-02 | XIAP     |
| miR-155-3p (miRNAs w/seed UCCUACA) | mature microRNA         | 1.41E-02 | AR       |
| miR-223-5p (miRNAs w/seed GUGUAUU) | mature microRNA         | 1.41E-02 | AR       |
| mir-448                            | microRNA                | 1.41E-02 | AR       |

|                                                      |                 |          |    |
|------------------------------------------------------|-----------------|----------|----|
| mir-567                                              | microRNA        | 1.41E-02 | AR |
| miR-509-3p (miRNAs<br>w/seed GAUUGGU)                | mature microRNA | 1.41E-02 | AR |
| miR-92a-2-5p<br>(miRNAs w/seed<br>GGUGGGG)           | mature microRNA | 1.41E-02 | AR |
| miR-488-5p (miRNAs<br>w/seed CCAGUA)                 | mature microRNA | 1.41E-02 | AR |
| mir-488                                              | microRNA        | 1.41E-02 | AR |
| miR-29a-5p (miRNAs<br>w/seed CUGAUUU)                | mature microRNA | 1.41E-02 | AR |
| miR-93-3p (miRNAs<br>w/seed CUGCUGA)                 | mature microRNA | 1.41E-02 | AR |
| mir-544                                              | microRNA        | 1.41E-02 | AR |
| miR-299a-3p (and<br>other miRNAs w/seed<br>AUGUGGG)  | mature microRNA | 1.41E-02 | AR |
| miR-28-3p (and other<br>miRNAs w/seed<br>ACUAGAU)    | mature microRNA | 1.41E-02 | AR |
| mir-365                                              | microRNA        | 1.41E-02 | AR |
| mir-541                                              | microRNA        | 1.41E-02 | AR |
| miR-1273h-5p (and<br>other miRNAs w/seed<br>UGGGAGG) | mature microRNA | 1.41E-02 | AR |
| miR-129-1-3p (and<br>other miRNAs w/seed<br>AGCCCUU) | mature microRNA | 1.41E-02 | AR |
| miR-767 (and other<br>miRNAs w/seed<br>GCACCAU)      | mature microRNA | 1.41E-02 | AR |
| mir-631                                              | microRNA        | 1.41E-02 | AR |

|                                              |                        |          |       |
|----------------------------------------------|------------------------|----------|-------|
| miR-744-3p (miRNAs w/seed UGUUGCC)           | mature microRNA        | 1.41E-02 | AR    |
| miR-876-3p (miRNAs w/seed GGUGGUU)           | mature microRNA        | 1.41E-02 | AR    |
| miR-501-3p (and other miRNAs w/seed AUGCACC) | mature microRNA        | 1.41E-02 | AR    |
| mir-646                                      | microRNA               | 1.41E-02 | AR    |
| miR-367-5p (miRNAs w/seed CUGUUGC)           | mature microRNA        | 1.41E-02 | AR    |
| miR-149-3p (and other miRNAs w/seed GGGAGGG) | mature microRNA        | 1.41E-02 | AR    |
| mir-552                                      | microRNA               | 1.41E-02 | AR    |
| mir-298                                      | microRNA               | 1.41E-02 | AR    |
| mir-493                                      | microRNA               | 1.41E-02 | IGF1R |
| miR-541-3p (and other miRNAs w/seed GGUGGGC) | mature microRNA        | 1.41E-02 | AR    |
| mir-586                                      | microRNA               | 1.41E-02 | AR    |
| mir-644                                      | microRNA               | 1.41E-02 | AR    |
| miR-486-3p (and other miRNAs w/seed GGGGCAG) | mature microRNA        | 1.41E-02 | AR    |
| PPP2R5E                                      | phosphatase            | 1.41E-02 | FN1   |
| DNAJB2                                       | other                  | 1.41E-02 | ATXN3 |
| GBP1                                         | enzyme                 | 1.41E-02 | MMP1  |
| COL5A1                                       | other                  | 1.41E-02 | FN1   |
| BCAR1                                        | enzyme                 | 1.41E-02 | ESR1  |
| HTRA2                                        | peptidase              | 1.41E-02 | XIAP  |
| KIR2DS2 (includes others)                    | transmembrane receptor | 1.41E-02 | IFNG  |
| SLC2A1                                       | transporter            | 1.41E-02 | MMP2  |

|                     |                                   |          |                                                 |
|---------------------|-----------------------------------|----------|-------------------------------------------------|
| RYK                 | kinase                            | 1.41E-02 | FN1                                             |
| PSMC3IP             | transcription regulator           | 1.41E-02 | CYP17A1                                         |
| ASH2L               | transcription regulator           | 1.41E-02 | ESR1                                            |
| ALDH1A3             | enzyme                            | 1.41E-02 | RRM1                                            |
| PLPP3               | phosphatase                       | 1.41E-02 | FN1                                             |
| SNCG                | other                             | 1.41E-02 | IGF1R                                           |
| MXD4                | transcription regulator           | 1.41E-02 | ODC1                                            |
| B4GALT5             | enzyme                            | 1.41E-02 | NOTCH1                                          |
| KIR2DL1/KIR2DL3     | other                             | 1.41E-02 | IFNG                                            |
| ICAM3               | transmembrane receptor            | 1.41E-02 | PPARG                                           |
| CAPNS1              | peptidase                         | 1.41E-02 | MMP2                                            |
| KIF4A               | other                             | 1.41E-02 | AR                                              |
| ARL6IP5             | other                             | 1.41E-02 | ITGB3                                           |
| PTPN9               | phosphatase                       | 1.41E-02 | MMP2                                            |
| PES1                | other                             | 1.41E-02 | HMOX1                                           |
| GPX4                | enzyme                            | 1.41E-02 | MMP1                                            |
| CD226               | other                             | 1.41E-02 | IFNG                                            |
| MRC1                | transmembrane receptor            | 1.41E-02 | IFNG                                            |
| KLRB1               | transmembrane receptor            | 1.41E-02 | IFNG                                            |
| RANBP2              | enzyme                            | 1.41E-02 | FN1                                             |
| NBN                 | other                             | 1.41E-02 | XIAP                                            |
| mir-297             | microRNA                          | 1.41E-02 | AR                                              |
| CTD_2245E153        | other                             | 1.41E-02 | PC                                              |
| SOCS2               | other                             | 1.41E-02 | IFNG                                            |
| protein phosphatase | complex                           | 1.41E-02 | ESR1                                            |
| ATF3                | transcription regulator           | 1.42E-02 | DCTD,IFNG,MSH2,RRM1                             |
| PI3K (family)       | group                             | 1.43E-02 | ESR1,HMOX1,MMP2,TJP1,XIAP                       |
| AR                  | ligand-dependent nuclear receptor | 1.46E-02 | AR,IGF1R,MMP2,MUC1,PGC,SMTN,TLR4,WEE1           |
| BRCA1               | transcription regulator           | 1.49E-02 | ESR1,FHIT,HBB,XRCC6                             |
| ETV5                | transcription regulator           | 1.52E-02 | FN1,MMP2,TJP1                                   |
| OGA                 | enzyme                            | 1.53E-02 | FLNB,FN1,G6PD,GTF2F2,HMGCS1,MAP3K3,PDHA1,S100A6 |
| MEG3                | other                             | 1.62E-02 | FN1,ZEB2                                        |

|                                       |                         |          |                                     |
|---------------------------------------|-------------------------|----------|-------------------------------------|
| SULF2                                 | enzyme                  | 1.62E-02 | MMP2,VEGFB                          |
| GALNT6                                | enzyme                  | 1.62E-02 | DPP4,FN1                            |
| IFT88                                 | other                   | 1.62E-02 | ACAT2,MMP2                          |
| LCK                                   | kinase                  | 1.62E-02 | IFNG,PPARG                          |
| PTP4A3                                | phosphatase             | 1.62E-02 | FN1,ITGB3                           |
| SMAD7                                 | transcription regulator | 1.62E-02 | IFNG,XIAP                           |
| miR-296-5p (miRNAs<br>w/seed GGGCCCC) | mature microRNA         | 1.62E-02 | KLK1,MMP1                           |
| MXI1                                  | transcription regulator | 1.62E-02 | APEX1,LARS1                         |
| ABL1                                  | kinase                  | 1.62E-02 | FAS,MMP1                            |
| TXNIP                                 | other                   | 1.62E-02 | G6PD,PGK1                           |
| CFLAR                                 | other                   | 1.62E-02 | HMOX1,XIAP                          |
| MAX                                   | transcription regulator | 1.64E-02 | APEX1,BCR,CSDE1                     |
| MET                                   | kinase                  | 1.64E-02 | FN1,HMOX1,MMP2                      |
| FOXA2                                 | transcription regulator | 1.75E-02 | ALB,RARA,RARG                       |
| CCN5                                  | growth factor           | 1.75E-02 | ESR1,FN1,MUC1                       |
| IDH1                                  | enzyme                  | 1.85E-02 | FN1,ZEB2                            |
| mir-218                               | microRNA                | 1.85E-02 | VAV3,ZEB2                           |
| SPARC                                 | other                   | 1.85E-02 | FN1,NOTCH1                          |
| EIF4E                                 | translation regulator   | 1.85E-02 | ESR1,XIAP                           |
| IFN Beta                              | group                   | 1.88E-02 | CD74,FN1,IFNG                       |
| ERG                                   | transcription regulator | 1.88E-02 | AR,BCR,FLNB,IGF1R,POU2F1,UTRN       |
| KDM1A                                 | enzyme                  | 1.94E-02 | CRYM,CYP7A1,HBB,IGF1R,RUVBL1,SMURF2 |
| mir-155                               | microRNA                | 2.00E-02 | HK2,IFNG,WEE1                       |
| IKZF1                                 | transcription regulator | 2.07E-02 | B2M,FN1,TLR4,TNFAIP8L2,UEVLD        |
| DPH5                                  | enzyme                  | 2.09E-02 | EP300,IFNG                          |
| PAX5                                  | transcription regulator | 2.09E-02 | FN1,MMP2                            |
| C3                                    | peptidase               | 2.09E-02 | FN1,IFNG                            |
| CLU                                   | other                   | 2.09E-02 | ATP7B,MMP2                          |
| SOX9                                  | transcription regulator | 2.09E-02 | AR,PPARG                            |
| PRDM1                                 | transcription regulator | 2.09E-02 | ESR1,IFNG                           |
| KLRC4-<br>KLRK1/KLRK1                 | transmembrane receptor  | 2.09E-02 | IFNG,PPARG                          |

|                     |                                   |          |                                   |
|---------------------|-----------------------------------|----------|-----------------------------------|
| Ap1                 | complex                           | 2.14E-02 | F3,MMP1,MMP2                      |
| mir-21              | microRNA                          | 2.14E-02 | FAS,FN1,MSH2                      |
| FAS                 | transmembrane receptor            | 2.14E-02 | FAS,MMP1,RND1                     |
| PPARG               | ligand-dependent nuclear receptor | 2.17E-02 | FN1,MUC1,PDK4,PPARG               |
| CD44                | other                             | 2.17E-02 | EP300,FAS,FN1,XIAP                |
| IL4                 | cytokine                          | 2.22E-02 | CD1A,IFNG,MMP1,MUC1,PPARG         |
| SMAD4               | transcription regulator           | 2.22E-02 | CYP17A1,FAP,IFNG,RAC1,XIAP        |
| STAT5a/b            | group                             | 2.27E-02 | IFNG,RARA,XIAP                    |
| MAP2K1              | kinase                            | 2.27E-02 | F3,MMP1,MMP2                      |
| HMOX1               | enzyme                            | 2.27E-02 | HMOX1,ITGB3,THBS2                 |
| NCOA3               | transcription regulator           | 2.27E-02 | HMOX1,NCOA3,PPARG                 |
| IL22                | cytokine                          | 2.35E-02 | IFNG,MUC1                         |
| FGFR1               | kinase                            | 2.35E-02 | HK2,SFN                           |
| CTBP1               | enzyme                            | 2.35E-02 | MUC1,RAC1                         |
| DDIT3               | transcription regulator           | 2.35E-02 | FN1,IFNG                          |
| PAK1                | kinase                            | 2.35E-02 | F3,FN1                            |
| IL10                | cytokine                          | 2.36E-02 | CD1A,IFNG,MUC1,TLR4               |
| SREBF1              | transcription regulator           | 2.37E-02 | ALOX12,FABP3,FABP7,HMOX1,OAT      |
| RBM5                | other                             | 2.41E-02 | ITPA,NCOA3,XIAP                   |
| mir-8               | microRNA                          | 2.56E-02 | MMP1,RAC1,ZEB2                    |
| PKNOX2              | transcription regulator           | 2.62E-02 | ESR1,FAS                          |
| NPPB                | other                             | 2.62E-02 | ACAT2,HMGCS1                      |
| TWIST2              | transcription regulator           | 2.62E-02 | FN1,ZEB2                          |
| HNF1B               | transcription regulator           | 2.62E-02 | ALB,SLC5A1                        |
| NPC2                | transporter                       | 2.62E-02 | PPARG,TLR4                        |
| MBD1                | transcription regulator           | 2.62E-02 | DPP4,ESR1                         |
| KLF11               | transcription regulator           | 2.62E-02 | FABP3,PDK4                        |
| MUC1                | other                             | 2.71E-02 | CD1A,MUC1,NOTCH1                  |
| E2F4                | transcription regulator           | 2.78E-02 | EXOSC9,HMGB3,MSH2,NDC80,RPA3,RRM1 |
| Alpha 1 antitrypsin | group                             | 2.81E-02 | MMP2                              |
| Ras homolog         | group                             | 2.81E-02 | TJP1                              |
| Ikb                 | group                             | 2.81E-02 | MMP1                              |



|                            |                         |          |         |
|----------------------------|-------------------------|----------|---------|
| CK1                        | group                   | 2.81E-02 | XIAP    |
| Rbp                        | group                   | 2.81E-02 | PPARG   |
| BTN3A1                     | other                   | 2.81E-02 | IFNG    |
| SLC48A1                    | transporter             | 2.81E-02 | IGF1R   |
| SNX27                      | other                   | 2.81E-02 | PPARG   |
| VSIR                       | other                   | 2.81E-02 | IFNG    |
| Integrin alpha V beta<br>3 | complex                 | 2.81E-02 | MMP1    |
| BTBD7                      | other                   | 2.81E-02 | MMP2    |
| CNEP1R1                    | other                   | 2.81E-02 | IFNG    |
| DENND1A                    | other                   | 2.81E-02 | CYP17A1 |
| ESRP2                      | other                   | 2.81E-02 | ZEB2    |
| ZNF385B                    | other                   | 2.81E-02 | FAS     |
| FOXG1                      | transcription regulator | 2.81E-02 | NCOA3   |
| Vla-4                      | complex                 | 2.81E-02 | F3      |
| FAS-AS1                    | other                   | 2.81E-02 | FAS     |
| Ferritin                   | complex                 | 2.81E-02 | HBB     |
| VTRNA2-1                   | other                   | 2.81E-02 | IFNG    |
| CABIN1                     | other                   | 2.81E-02 | MMP2    |
| MXD1                       | transcription regulator | 2.81E-02 | ODC1    |
| CD244                      | transmembrane receptor  | 2.81E-02 | IFNG    |
| IBSP                       | other                   | 2.81E-02 | ITGB3   |
| PMEPA1                     | other                   | 2.81E-02 | AR      |
| NUP98                      | transporter             | 2.81E-02 | YWHAH   |
| TAC4                       | other                   | 2.81E-02 | MMP2    |
| SP100                      | transcription regulator | 2.81E-02 | MMP1    |
| ARID5B                     | transcription regulator | 2.81E-02 | IFNG    |
| LAMA3                      | other                   | 2.81E-02 | MMP1    |
| LY96                       | transmembrane receptor  | 2.81E-02 | TLR4    |
| PIAS2                      | transcription regulator | 2.81E-02 | MUC1    |
| mir-708                    | microRNA                | 2.81E-02 | AR      |

|                                                    |                        |          |        |
|----------------------------------------------------|------------------------|----------|--------|
| miR-16-1-3p<br>(miRNAs w/seed<br>CAGUAUU)          | mature microRNA        | 2.81E-02 | WEE1   |
| miR-675-3p (miRNAs<br>w/seed UGUAUGC)              | mature microRNA        | 2.81E-02 | TJP1   |
| miR-424-3p (miRNAs<br>w/seed AAAACGU)              | mature microRNA        | 2.81E-02 | WEE1   |
| mir-368                                            | microRNA               | 2.81E-02 | AR     |
| miR-292-3p (and<br>other miRNAs w/seed<br>AGUGCCG) | mature microRNA        | 2.81E-02 | AR     |
| miR-128-3p (and<br>other miRNAs w/seed<br>CACAGUG) | mature microRNA        | 2.81E-02 | WEE1   |
| mir-346                                            | microRNA               | 2.81E-02 | BTK    |
| miR-4728-3p<br>(miRNAs w/seed<br>AUGCUGA)          | mature microRNA        | 2.81E-02 | ESR1   |
| MIR4728                                            | microRNA               | 2.81E-02 | ESR1   |
| miR-758-5p (and<br>other miRNAs w/seed<br>GGUUGAC) | mature microRNA        | 2.81E-02 | AR     |
| EGFL7                                              | other                  | 2.81E-02 | NOTCH1 |
| KAT6A                                              | enzyme                 | 2.81E-02 | ESR1   |
| MTBP                                               | other                  | 2.81E-02 | ODC1   |
| PDE4A                                              | enzyme                 | 2.81E-02 | FN1    |
| FCGR1A                                             | transmembrane receptor | 2.81E-02 | F3     |
| CDC14A                                             | phosphatase            | 2.81E-02 | WEE1   |
| NCSTN                                              | peptidase              | 2.81E-02 | NOTCH1 |
| VPS35                                              | transporter            | 2.81E-02 | PPARG  |
| USP14                                              | peptidase              | 2.81E-02 | AR     |
| PDCD6IP                                            | other                  | 2.81E-02 | ESR1   |
| BCAN                                               | other                  | 2.81E-02 | ITGB3  |

|         |                                   |          |                           |
|---------|-----------------------------------|----------|---------------------------|
| DRD5    | G-protein coupled receptor        | 2.81E-02 | IFNG                      |
| BRD8    | transcription regulator           | 2.81E-02 | PPARG                     |
| SOX10   | transcription regulator           | 2.81E-02 | NOTCH1                    |
| PTGS1   | enzyme                            | 2.81E-02 | MMP2                      |
| TRADD   | other                             | 2.81E-02 | AR                        |
| SLAMF6  | transmembrane receptor            | 2.81E-02 | IFNG                      |
| CD276   | other                             | 2.81E-02 | IFNG                      |
| BMP5    | growth factor                     | 2.81E-02 | CYP17A1                   |
| PPP1CA  | phosphatase                       | 2.81E-02 | AR                        |
| PARP2   | enzyme                            | 2.81E-02 | FAS                       |
| ENTPD1  | enzyme                            | 2.81E-02 | IFNG                      |
| HP      | peptidase                         | 2.81E-02 | HMOX1                     |
| NDFIP2  | other                             | 2.81E-02 | IFNG                      |
| PTK2B   | kinase                            | 2.81E-02 | IFNG                      |
| ANGPTL4 | other                             | 2.81E-02 | MMP1                      |
| BRD2    | kinase                            | 2.81E-02 | HMOX1                     |
| DGKA    | kinase                            | 2.81E-02 | WEE1                      |
| CCR5    | G-protein coupled receptor        | 2.81E-02 | F3                        |
| RAMAC   | other                             | 2.81E-02 | RUVBL1                    |
| LGALS9  | other                             | 2.81E-02 | IFNG                      |
| NOS1AP  | other                             | 2.81E-02 | RAC1                      |
| IL12RB2 | transmembrane receptor            | 2.81E-02 | IFNG                      |
| EIF4A1  | translation regulator             | 2.81E-02 | MUC1                      |
| NCOA4   | transcription regulator           | 2.81E-02 | AR                        |
| HNRNPAB | enzyme                            | 2.81E-02 | HBB                       |
| THRB    | ligand-dependent nuclear receptor | 2.87E-02 | IGF1R,MMP1,PPARG          |
| STAT1   | transcription regulator           | 2.88E-02 | C1R,FAS,MUC1,TRIM21,WARS1 |
| CLDN7   | other                             | 2.88E-02 | ASAP1,F3,MMP2,MUC1,SF3B6  |
| RICTOR  | other                             | 2.90E-02 | HK2,RAC1                  |
| mir-27  | microRNA                          | 2.90E-02 | ESR1,PSAP                 |
| mir-146 | microRNA                          | 2.90E-02 | IFNG,TLR4                 |
| JARID2  | transcription regulator           | 2.90E-02 | PPARG,ZEB2                |

|                 |                                   |          |                                                              |
|-----------------|-----------------------------------|----------|--------------------------------------------------------------|
| SFPQ            | other                             | 2.90E-02 | AR,CYP17A1                                                   |
| NFKBIA          | transcription regulator           | 2.90E-02 | MSH2,XIAP                                                    |
| TCF7            | transcription regulator           | 2.90E-02 | PPARG,RARA                                                   |
| NR3C1           | ligand-dependent nuclear receptor | 2.93E-02 | BTK,CUL1,DAPK2,FN1,IGF1R,NFATC1,NMT1,NR1I3,PRKCB,PTK2B,YWHAH |
| TLR4            | transmembrane receptor            | 3.01E-02 | IFNG,MMP1,RAC1,TLR4                                          |
| ESRRA           | transcription regulator           | 3.06E-02 | HK2,HMOX1,PNMT,PPARG,RARA                                    |
| F2              | peptidase                         | 3.20E-02 | FN1,MMP1                                                     |
| SDCBP           | enzyme                            | 3.20E-02 | MMP2,RAC1                                                    |
| C5              | cytokine                          | 3.20E-02 | FN1,MMP1                                                     |
| PML-RARA        | fusion gene/product               | 3.20E-02 | F3,HMOX1                                                     |
| EML4-ALK        | fusion gene/product               | 3.24E-02 | CERT1,MMP1,MMP2,PPARG                                        |
| TREM1           | transmembrane receptor            | 3.32E-02 | F3,FABP3,HBEGF,MMP1,PPARG,SFMBT2                             |
| Secretase gamma | complex                           | 3.50E-02 | NOTCH1,PTPRF                                                 |
| Tlr             | group                             | 3.50E-02 | IFNG,NOTCH1                                                  |
| JUND            | transcription regulator           | 3.50E-02 | F3,HMOX1                                                     |
| SOX11           | transcription regulator           | 3.64E-02 | CUL1,EP300,ERBB4,FAS,HMGB3                                   |
| SAFB            | other                             | 3.71E-02 | B2M,CD74,HMOX1                                               |
| FSH             | complex                           | 3.79E-02 | ACP3,HK2,MAPK6,MMP2,PGK1,PPP2R1A,PTPRE,PTPRF                 |
| POU2F1          | transcription regulator           | 3.82E-02 | APEX1,ESR1                                                   |
| TFEB            | transcription regulator           | 3.82E-02 | PSAP,VPS26A                                                  |
| IRF4            | transcription regulator           | 3.88E-02 | B2M,IFNG,STK4,SUB1                                           |
| MAP2K1/2        | group                             | 3.90E-02 | CYP7A1,HK2,RRM1                                              |
| FOS             | transcription regulator           | 4.01E-02 | FN1,HK2,MMP1,VAV3                                            |
| IRF1            | transcription regulator           | 4.08E-02 | B2M,IFNG,ODC1                                                |
| KLF5            | transcription regulator           | 4.08E-02 | NOTCH1,PPARG,RARA                                            |
| SRC (family)    | group                             | 4.14E-02 | FN1,ITGB3                                                    |
| HLX             | transcription regulator           | 4.14E-02 | IFNG,KYNU                                                    |
| CCL2            | cytokine                          | 4.14E-02 | MMP1,MMP2                                                    |
| RAF1            | kinase                            | 4.14E-02 | FAS,MMP1                                                     |
| MIF             | cytokine                          | 4.14E-02 | MMP1,MMP2                                                    |
| FFAR3           | G-protein coupled receptor        | 4.18E-02 | PPARG                                                        |
| HSP             | group                             | 4.18E-02 | IFNG                                                         |

|                                                    |                            |          |        |
|----------------------------------------------------|----------------------------|----------|--------|
| PI3K 纬                                             | group                      | 4.18E-02 | IFNG   |
| MIR100HG                                           | other                      | 4.18E-02 | FN1    |
| CREB3L3                                            | transcription regulator    | 4.18E-02 | CYP7A1 |
| CCDC134                                            | other                      | 4.18E-02 | IFNG   |
| NDUFAF3                                            | other                      | 4.18E-02 | ESR1   |
| MMS19                                              | transcription regulator    | 4.18E-02 | CIAO1  |
| FFAR2                                              | G-protein coupled receptor | 4.18E-02 | PPARG  |
| NAA30                                              | enzyme                     | 4.18E-02 | FAS    |
| ASCL1                                              | transcription regulator    | 4.18E-02 | CDK5R1 |
| KLHL42                                             | other                      | 4.18E-02 | FN1    |
| CIAO2B                                             | other                      | 4.18E-02 | CIAO1  |
| FBXL16                                             | other                      | 4.18E-02 | NCOA3  |
| MAGEA3/MAGEA6                                      | other                      | 4.18E-02 | IFNG   |
| gelatinase                                         | group                      | 4.18E-02 | TJPI   |
| MEN1                                               | transcription regulator    | 4.18E-02 | AR     |
| POLG                                               | enzyme                     | 4.18E-02 | AR     |
| HEY2                                               | transcription regulator    | 4.18E-02 | SMTN   |
| AP2M1                                              | other                      | 4.18E-02 | CD74   |
| STAT4                                              | transcription regulator    | 4.18E-02 | IFNG   |
| SH2D1A                                             | other                      | 4.18E-02 | IFNG   |
| COL3A1                                             | other                      | 4.18E-02 | FN1    |
| TAF4                                               | transcription regulator    | 4.18E-02 | AR     |
| TIMP2                                              | other                      | 4.18E-02 | MMP2   |
| FBLN2                                              | other                      | 4.18E-02 | MMP2   |
| ARHGAP31                                           | other                      | 4.18E-02 | ZEB2   |
| miR-222-5p (miRNAs<br>w/seed UCAGUAG)              | mature microRNA            | 4.18E-02 | AR     |
| mir-147                                            | microRNA                   | 4.18E-02 | AR     |
| mir-95                                             | microRNA                   | 4.18E-02 | AR     |
| miR-132-3p (and<br>other miRNAs w/seed<br>AACAGUC) | mature microRNA            | 4.18E-02 | EP300  |

|                                                  |                            |          |       |
|--------------------------------------------------|----------------------------|----------|-------|
| miR-346 (and other<br>miRNAs w/seed<br>GUCUGCC)  | mature microRNA            | 4.18E-02 | BTK   |
| miR-1-3p (and other<br>miRNAs w/seed<br>GGAAUGU) | mature microRNA            | 4.18E-02 | ESR1  |
| HGS                                              | other                      | 4.18E-02 | ESR1  |
| PTGDR                                            | G-protein coupled receptor | 4.18E-02 | IFNG  |
| EPHB4                                            | kinase                     | 4.18E-02 | AR    |
| CEACAM3                                          | other                      | 4.18E-02 | IFNG  |
| DDR1                                             | kinase                     | 4.18E-02 | MMP1  |
| KCNMA1                                           | ion channel                | 4.18E-02 | MMP2  |
| PRKCQ                                            | kinase                     | 4.18E-02 | IFNG  |
| CD86                                             | transmembrane receptor     | 4.18E-02 | IFNG  |
| GFER                                             | enzyme                     | 4.18E-02 | NR1I3 |
| MAP3K5                                           | kinase                     | 4.18E-02 | MSH2  |
| HTRA1                                            | peptidase                  | 4.18E-02 | MMP1  |
| RBP4                                             | other                      | 4.18E-02 | RARA  |
| PAX2                                             | transcription regulator    | 4.18E-02 | ITGB3 |
| ITGB6                                            | other                      | 4.18E-02 | MMP2  |
| USP19                                            | peptidase                  | 4.18E-02 | ATXN3 |
| AJUBA                                            | transcription regulator    | 4.18E-02 | WEE1  |
| C8orf44-SGK3/SGK3                                | kinase                     | 4.18E-02 | ESR1  |
| SENPI                                            | peptidase                  | 4.18E-02 | MMP2  |
| CD48                                             | other                      | 4.18E-02 | IFNG  |
| TGFBR3                                           | kinase                     | 4.18E-02 | FN1   |
| RECQL                                            | enzyme                     | 4.18E-02 | HBB   |
| CCNA1                                            | other                      | 4.18E-02 | MMP2  |
| XCL1                                             | cytokine                   | 4.18E-02 | IFNG  |
| CD247                                            | transmembrane receptor     | 4.18E-02 | IFNG  |
| CRLF1                                            | other                      | 4.18E-02 | IFNG  |
| EXOC7                                            | transporter                | 4.18E-02 | ZEB2  |
| G3BP2                                            | enzyme                     | 4.18E-02 | SART3 |

|                  |                                   |          |                                                |
|------------------|-----------------------------------|----------|------------------------------------------------|
| TFE3             | transcription regulator           | 4.18E-02 | VPS26A                                         |
| SMAD6            | transcription regulator           | 4.18E-02 | IFNG                                           |
| GADD45GIP1       | other                             | 4.18E-02 | HMOX1                                          |
| ACTG1-MITF       | fusion gene/product               | 4.18E-02 | APEX1                                          |
| EP300            | transcription regulator           | 4.29E-02 | AR,CHKA,FN1,MMP1                               |
| CST5             | other                             | 4.30E-02 | ACAT2,ANXA6,ARF6,HNRNPA2B1,KIF11,MSN,NCBP1,NF2 |
| MAPK9            | kinase                            | 4.47E-02 | PPARG,RAC1,SEM1                                |
| PIM1             | kinase                            | 4.48E-02 | IFNG,IGF1R                                     |
| RAC1             | enzyme                            | 4.48E-02 | MMP1,RAC1                                      |
| Interferon alpha | group                             | 4.64E-02 | BCR,CSF2RB,IFNG,NF2,NT5C3A,SLC5A1,TLR4         |
| PPARA            | ligand-dependent nuclear receptor | 4.67E-02 | CYP7A1,EP300,PDK4                              |
| SP3              | transcription regulator           | 4.73E-02 | CYP17A1,ESR1,IGF1R,MMP2                        |
| SMAD3            | transcription regulator           | 4.73E-02 | FN1,IFNG,RAC1,XIAP                             |
| CAV1             | transmembrane receptor            | 4.82E-02 | HK2,TJP1                                       |

---

**Supplementary Table S5: The causal regulatory network analysis by IPA for solasonine.** The causal regulatory network analysis by IPA was performed to explore the causal network these predicted upstream regulators may be involved in and their correspondent master regulators. Master regulators were predicted and sorted by increasing of p-value (p-value  $\leq 0.05$ ).

| Master regulator                             | Molecule type           | p-value  | Network bias-corrected p-value | Participating regulators                                                           | Target molecules in dataset of solasonine related genes                                                                                                                       | Number of target molecules-connected regulators | Number of target molecules |
|----------------------------------------------|-------------------------|----------|--------------------------------|------------------------------------------------------------------------------------|-------------------------------------------------------------------------------------------------------------------------------------------------------------------------------|-------------------------------------------------|----------------------------|
| DDX5                                         | enzyme                  | 8.91E-14 | 1.00E-04                       | DDX5,ERK1/2,let-7,MMP2,MMP9,NFkB (complex)                                         | AR,B2M,CSF2RB,CTCF,CYP17A1,CYP7A1,ESR1,FAS,FN1,HBEGF,HK2,HMOX1,IFNG,IGF1R,ITGB3,KYNU,MAPK6,MDH1,MMP1,MMP2,MSH2,NDUFB1,NOTCH1,PA2G4,PPP2R1A,PTPRE,SENP2,STARD13,TJP1,TLR4,XIAP | 6                                               | 31                         |
| let-7                                        | microRNA                | 1.79E-13 | 2.00E-04                       | ERK1/2,let-7,MMP2,MMP9,NFkB (complex)                                              | AR,B2M,CSF2RB,CTCF,CYP17A1,CYP7A1,ESR1,FAS,FN1,HBEGF,HK2,HMOX1,IFNG,IGF1R,ITGB3,KYNU,MAPK6,MMP1,MMP2,MSH2,NOTCH1,PA2G4,PPP2R1A,PTPRE,SENP2,STARD13,TJP1,TLR4,XIAP             | 5                                               | 29                         |
| TIMP2                                        | other                   | 2.33E-12 | 5.00E-04                       | Akt,ERK1/2,GSK3B,MMP2,PI3K (family),RELA,TIMP2                                     | B2M,CERT1,CSF2RB,CTCF,CYP17A1,CYP7A1,ESR1,F3,FAS,FN1,HBEGF,HK2,HMOX1,IFNG,IGF1R,MMP1,MMP2,MUC1,NOTCH1,PKD4,PPARG,PPP2R1A,PTPRE,RAC1,STK4,XIAP                                 | 7                                               | 26                         |
| miR-491-5p (and other miRNAs w/seed GUGGGGA) | mature microRNA         | 3.36E-12 | 4.00E-04                       | ERK1/2,Hsp90,miR-491-5p (and other miRNAs w/seed GUGGGGA),MMP2,MMP9,NFkB (complex) | AR,B2M,CSF2RB,CTCF,CYP17A1,CYP7A1,ESR1,FAS,FN1,GRK6,HBEGF,HK2,HMOX1,IFNG,IGF1R,KYNU,MMP1,MMP2,MSH2,NOTCH1,PPP2R1A,PTPRE,SENP2,TJP1,XIAP                                       | 6                                               | 25                         |
| RASGRP1                                      | other                   | 5.94E-12 | 6.00E-04                       | ERK,ERK1/2,Jnk,KRAS,RASGRP1                                                        | B2M,BTRC,CDK5R1,CYP17A1,CYP7A1,ESR1,FAS,FN1,HK2,IFNG,IGF1R,ITGB3,MMP1,MMP2,MSH2,MUC1,ODC1,PC,PKD4,PTPRE,RARA,XIAP,YY1                                                         | 5                                               | 23                         |
| RAF1                                         | kinase                  | 8.66E-12 | 1.40E-03                       | ADCY,CHUK,ERK,ERK1/2,IKBKB,Jnk,MAPK1,RAF1,RB1,RELA,Src                             | AR,B2M,BTRC,CDK5R1,CERT1,CTCF,CYP17A1,CYP7A1,DGKA,ESR1,FAS,FN1,HBEGF,HK2,IFNG,IGF1R,ITGB3,MMP1,MMP2,MSH2,MUC1,NFATC1,NOTCH1,ODC1,PKD4,PPARG,PTPRE,RARA,STK4,TRIM21,XIAP,ZEB2  | 11                                              | 32                         |
| PDPN                                         | other                   | 9.63E-12 | 1.20E-03                       | ERK,ERK1/2,MMP2,MMP9,P38 MAPK,PDPN,RHOA,RHOC,Tgf beta                              | B2M,CDK5R1,CSF2RB,CYP17A1,CYP7A1,DGKA,ESR1,F3,HK2,HMOX1,IFNG,IGF1R,ITGB3,MMP2,MSH2,MUC1,ODC1,PDHA1,PKD4,PPP2R1A,PTPRE,RARA,TJP1,XIAP                                          | 7                                               | 24                         |
| ARHGAP35                                     | transcription regulator | 1.03E-11 | 1.20E-03                       | ARHGAP35,ERK,ERK1/2,MMP2,MMP9,P38 MAPK,RHOA,RHOC,Tgf beta                          | B2M,CDK5R1,CSF2RB,CYP17A1,CYP7A1,DGKA,ESR1,F3,HK2,HMOX1,IFNG,IGF1R,ITGB3,MMP2,MSH2,MUC1,ODC1,PDHA1,PKD4,PPP2R1A,PTPRE,RARA,TJP1,XIAP                                          | 7                                               | 24                         |



|         |                         |          |          |                                                                                          |                                                                                                                                                                                       |    |    |
|---------|-------------------------|----------|----------|------------------------------------------------------------------------------------------|---------------------------------------------------------------------------------------------------------------------------------------------------------------------------------------|----|----|
| TNFSF11 | cytokine                | 1.22E-11 | 8.00E-04 | ERK1/2,NFkB (complex),STAT1,TNFSF11                                                      | B2M,C1R,CTCF,CYP17A1,CYP7A1,ESR1,FAS,FN1,HBEGF,HK2,HMOX1,IFNG,IGF1R,KYNU,MMP1,MMP2,MSH2,MUC1,NFATC1,NOTCH1,PTPRE,SENP2,TRIM21,WARS1,XIAP                                              | 4  | 25 |
| RPTOR   | other                   | 1.48E-11 | 1.00E-03 | Akt,EIF4E,ERK1/2,MTOR,RAC1,RHOA,RPTOR,SREBF1,SREBF2,TFEB                                 | AR,B2M,CHKA,CYP17A1,CYP7A1,ESR1,F3,FABP3,FABP7,FN1,GTF2I,HBEGF,HK2,IFNG,IGF1R,MMP1,NOTCH1,PDHA1,PKD4,PPARG,PSAP,PTPRE,TJP1,VPS26A,XIAP                                                | 9  | 25 |
| IKBKE   | kinase                  | 3.00E-11 | 5.00E-03 | Akt,ERK1/2,GSK3B,IKBKE,IRF3,MAP2K1/2,NFkB (complex),P38 MAPK,RELA                        | B2M,CERT1,CYP17A1,CYP7A1,DGKA,ESR1,FAS,HBEGF,HK2,IFNG,ITGB3,KYNU,MMP1,MMP2,MUC1,NOTCH1,PDHA1,PKD3,PKD4,PGK1,PPARG,PTPRE,PYGL,RAC1,RARA,RRM1,SENP2,STK4,TJP1,XIAP                      | 9  | 30 |
| ARRB1   | transcription regulator | 3.18E-11 | 1.90E-03 | ADCY,AKT1,ARRB1,EGFR,ERK,ERK1/2,IGF1R,Jnk,MAPK1,NR3C1,Ras homolog,RELA                   | B2M,BTRC,CDK5R1,CERT1,CTCF,CYP17A1,CYP7A1,ESR1,F3,FN1,HBB,HK2,HMOX1,HNRNPA2B1,IGF1R,ITGB3,MMP1,MMP2,MSH2,MUC1,NFATC1,NR1I3,ODC1,PKD4,PPARG,PTPRE,RAC1,RARA,STK4,TJP1,TRIM21,XIAP,ZEB2 | 11 | 33 |
| LCK     | kinase                  | 3.48E-11 | 3.30E-03 | DGKA,ERK,ERK1/2,Jnk,LCK,Mapk,NFkB (complex),PTPN6                                        | B2M,BTRC,CDK5R1,CTCF,CYP17A1,CYP7A1,ESR1,FN1,HK2,HMOX1,IFNG,IGF1R,ITGB3,KYNU,MMP1,MMP2,MUC1,NOTCH1,NR1I3,ODC1,PKD4,PPARG,PTPRE,RARA,SENP2,WEE1                                        | 8  | 26 |
| RHOC    | enzyme                  | 3.53E-11 | 2.00E-04 | ERK,MMP2,MMP9,P38 MAPK,RHOA,RHOC                                                         | CDK5R1,CSF2RB,DGKA,ESR1,F3,FN1,HBEGF,HMOX1,IFNG,ITGB3,MMP1,MMP2,MSH2,MUC1,ODC1,PDHA1,PKD4,PPP2R1A,RARA,TJP1                                                                           | 5  | 20 |
| LYN     | kinase                  | 4.81E-11 | 3.20E-03 | EGFR,ERK1/2,LYN,MAPK8,NFkB (complex),RAC1,STAT1                                          | AR,B2M,C1R,CTCF,CYP17A1,CYP7A1,ESR1,F3,FAS,FN1,HBEGF,HK2,HMOX1,HNRNPA2B1,IGF1R,KYNU,MMP1,MMP2,MSH2,MUC1,NOTCH1,PTPRE,RARA,SENP2,TRIM21,WARS1,ZEB2                                     | 6  | 27 |
| IL31    | other                   | 5.03E-11 | 5.30E-03 | Akt,ERK1/2,Hsp27,IL31,JAK1,JAK2,Jnk,MAPK,MAPK8,MAPK9,P38 MAPK,PI3K (complex),STAT1,STAT3 | B2M,BTRC,C1R,CD1A,CYP17A1,CYP7A1,DGKA,ESR1,FAS,HBEGF,HK2,HMOX1,IFNG,ITGB3,MMP1,MMP2,MSH2,MUC1,NOTCH1,NR1I3,PKD4,PGK1,PPARG,PTPRE,RAC1,RARA,SEM1,TJP1,TRIM21,WARS1,XIAP                | 13 | 31 |
| IL15    | cytokine                | 5.11E-11 | 4.00E-03 | Akt,ERK1/2,IL15,JAK1,Jnk,P38 MAPK,STAT1,STAT5a/b,TERT                                    | AR,B2M,BTRC,C1R,CYP17A1,CYP7A1,DGKA,ESR1,FAS,G6PD,GALM,HBEGF,HK2,HMOX1,IFNG,IGF1R,ITGB3,MMP1,MMP2,MSH2,MUC1,NOTCH1,PKD4,PGK1,PTPRE,RARA,TJP1,TRIM21,WARS1,XIAP                        | 9  | 30 |
| PF4     | cytokine                | 8.45E-11 | 2.70E-03 | ERK1/2,Jnk,P38 MAPK,PF4,PI3K (complex)                                                   | B2M,BTRC,CD1A,CYP17A1,CYP7A1,DGKA,ESR1,F3,FAS,HBEGF,HK2,HMOX1,IFNG,IGF1R,ITGB3,MMP1,MMP2,MSH2,NOTCH1,PTPRE,RARA,XIAP                                                                  | 5  | 22 |
| RICTOR  | other                   | 8.65E-11 | 1.50E-03 | Akt,AKT1,AKT2,FOXO1,MTOR,RAC1,RHOA,RICTOR,SREBF1,SREBF2,STAT1,TYK2                       | AR,C1R,CAMK4,CHKA,ESR1,F3,FABP3,FABP7,FAS,GTF2I,HK2,HMOX1,IFNG,IGF1R,KIF11,MMP1,MMP2,MUC1,NOTCH1,PDHA1,PKD4,PPARG,RAC1,TJP1,TRIM21,WARS1                                              | 12 | 26 |

|         |                            |          |          |                                                                                                                                              |                                                                                                                                                                                                                                                                                                         |    |    |
|---------|----------------------------|----------|----------|----------------------------------------------------------------------------------------------------------------------------------------------|---------------------------------------------------------------------------------------------------------------------------------------------------------------------------------------------------------------------------------------------------------------------------------------------------------|----|----|
| CHRNA7  | transmembrane receptor     | 9.58E-11 | 1.63E-02 | Akt,CEBPB,CHRNA7,EGFR,ERK,FOXO1,GSK3B,Hsp27,IRF3,KAT5,MMP2,MYC,NFkB (complex),NR3C1,P38 MAPK,PGR,PPARGC1A,RELA,SREBF2,STAT1,TP63,YAP1,YBX1   | ALB,APEX1,BCR,CAMK4,CD1A,CDK5R1,CERT1,CSF2RB,CYP7A1,DGKA,DTYMK,F3,FABP7,FAP,FAS,FN1,GTF2I,HBB,HK2,HMOX1,HNRNPA2B1,IFNG,IGF1R,ITGB3,KIF11,KYNU,MATK,MMP1,MSH2,MUC1,NFATC1,NOTCH1,NR1I3,ODC1,PK4,PGK1,PNMT,PPP2R1A,PTPRE,RAC1,RARA,RRM1,SEN2,SERPINA5,SFN,STK4,THBS2,TJP1,WEE1                            | 23 | 49 |
| SUPT20H | other                      | 1.01E-10 | 1.85E-02 | Akt,CEBPB,EGFR,Hsp27,Jnk,KAT5,MAP3K7,MAPK9,MMP2,MTOR,NFkB (complex),NR3C1,P38 MAPK,PGR,PPARGC1A,RELA,RHOA,SP1,SREBF1,STAT1,SUPT20H,TP63,YAP1 | ALB,APEX1,BTRC,C1R,CD1A,CERT1,CHKA,CSF2RB,CTCF,CYP7A1,DGKA,DTYMK,F3,FABP3,FABP7,FAS,FN1,HBEGF,HMOX1,HNRNPA2B1,IFNG,ITGB3,KYNU,MATK,MMP1,MMP2,MSH2,MUC1,NFATC1,NR1I3,PDHA1,PK4,PNMT,PPARG,PPP2R1A,PTPRE,RAC1,RARA,RRM1,SEM1,SEN2,SERPINA5,SFN,STK4,THBS2,TRIM21,WARS1,WEE1                               | 21 | 48 |
| GNL1    | other                      | 1.36E-10 | 2.90E-03 | Akt,CCND1,CDKN1A,ERK1/2,GNL1,Hsp70,Jnk,MAPK9,NFE2L2,NFkB (complex),RB1,RELA                                                                  | AR,B2M,BTRC,CERT1,CTCF,CYP17A1,CYP7A1,ESR1,F3,FN1,G6PD,HBEGF,HK2,ITGB3,KYNU,MMP1,MSH2,MUC1,NCOA3,NOTCH1,PK4,PPARG,PTPRE,RAC1,RRM1,SEM1,SEN2,STK4,TJP1,XIAP,ZEB2                                                                                                                                         | 10 | 32 |
| ARRB2   | other                      | 1.54E-10 | 5.50E-03 | ADCY,Akt,ARRB2,EGFR,ERK,IGF1R,Jnk,NOS2,P38 MAPK,RELA                                                                                         | AR,BTRC,CDK5R1,CERT1,CTCF,DGKA,FN1,HBEGF,HK2,HNRNPA2B1,IGF1R,ITGB3,MMP1,MMP2,MSH2,MUC1,NFATC1,NOTCH1,ODC1,PPARG,PTPRE,RAC1,RARA,STK4,TJP1,TLR4,ZEB2                                                                                                                                                     | 9  | 27 |
| PIP5K1C | kinase                     | 1.61E-10 | 7.40E-03 | Akt,EGFR,ERK,ERK1/2,FOXO1,HIF1A,IRF3,Jnk,MAP2K1/2,Mapk,MAPK1,MTOR,P38 MAPK,PGR,PIP5K1C,RELA,RHOA,SREBF2,STAT1,YBX1                           | AR,B2M,BTRC,C1R,CAMK4,CDK5R1,CERT1,CHKA,CYP17A1,CYP7A1,DGKA,ERBB4,ESR1,F3,FABP7,GTF2I,HBB,HK2,HNRNPA2B1,IFNG,IGF1R,KIF11,MATK,MMP1,MMP2,MUC1,NAE1,NOTCH1,NR1I3,ODC1,PDHA1,PK4,PNMT,PTPRE,RARA,RRM1,SERPINA5,STK4,TJP1,TRIM21,WARS1,XIAP,ZEB2                                                            | 19 | 43 |
| CCN1    | other                      | 1.66E-10 | 8.90E-03 | Akt,CCN1,ERK1/2,JUN,LRP6,MMP2,NFkB (complex)                                                                                                 | B2M,CSF2RB,CTCF,CYP17A1,CYP7A1,ESR1,F3,FAS,FN1,HBEGF,HK2,HMOX1,IFNG,ITGB3,KYNU,MMP1,MMP2,MSH2,MUC1,NOTCH1,PK4,PPP2R1A,PTPRE,SEN2,TJP1,XIAP                                                                                                                                                              | 7  | 26 |
| ACKR3   | G-protein coupled receptor | 1.82E-10 | 2.10E-03 | ACKR3,EGFR,ERK,ERK1/2                                                                                                                        | AR,B2M,CDK5R1,CYP17A1,CYP7A1,ESR1,F3,FAS,FN1,HK2,HNRNPA2B1,IGF1R,ITGB3,MMP1,MMP2,MUC1,ODC1,PK4,PTPRE,XIAP,ZEB2                                                                                                                                                                                          | 3  | 21 |
| WNT5A   | cytokine                   | 1.93E-10 | 8.40E-03 | Akt,AR,CEBPB,EGFR,ERK1/2,ESR1,FOXO1,HSF1,Hsp27,IRF3,Jnk,KAT5,MMP2,MTOR,MYC,NR3C1,P38 MAPK,PGR,RELA,RHOA,SIRT1,SREBF2,TFEB,TP63,WNT5A,YBX1    | ALB,APEX1,AR,B2M,BCR,BTRC,CAMK4,CD1A,CERT1,CHKA,CSF2RB,CYP17A1,DGKA,EP300,F3,FABP7,FAP,FAS,FN1,GTF2I,HBB,HMOX1,HNRNPA2B1,HSP90AB1,IGF1R,ITGB3,KIF11,MATK,MMP1,MSH2,MUC1,NFATC1,NMRK1,NOTCH1,NR1I3,ODC1,PDHA1,PK4,PNMT,PPP2R1A,PSAP,PTPRE,RARA,SEMA4D,SERPINA5,SMTN,STK4,THBS2,TJP1,TLR4,TTR,VPS26A,XIAP | 26 | 53 |

|                           |                        |          |          |                                                                                                                                                                                             |                                                                                                                                                                                                                                                                                                                                         |    |    |
|---------------------------|------------------------|----------|----------|---------------------------------------------------------------------------------------------------------------------------------------------------------------------------------------------|-----------------------------------------------------------------------------------------------------------------------------------------------------------------------------------------------------------------------------------------------------------------------------------------------------------------------------------------|----|----|
| KRAS                      | enzyme                 | 2.28E-10 | 7.60E-03 | Akt,ATM,ERK,ERK1/2,KRAS,NFkB (complex)                                                                                                                                                      | B2M,CDK5R1,CTCF,CYP17A1,CYP7A1,ESR1,F3,FN1,HK2,HMOX1,IFNG,IGF1R,ITGB3,KYNU,MMP1,MMP2,MSH2,MUC1,NOTCH1,ODC1,PC,PTPRE,SEN2,TJP1,XIAP,YY1                                                                                                                                                                                                  | 6  | 26 |
| LILRB4                    | other                  | 2.32E-10 | 2.98E-02 | Akt,AR,CEBPB,CHUK,CTNNB1,EGFR,FOXO1,GLI1,GSK3B,Hsp27,IKBKB,IRF3,Jnk,KAT5,LILRB4,MMP2,MTOR,NFkB (complex),NFKBIA,NR3C1,P38 MAPK,PGR,PPARGC1A,RELA,SP1,SREBF2,STAT1,STAT3,TP63,TP73,YAP1,YBX1 | ALB,ANG,ANXA6,APEX1,BTRC,C1R,CAMK4,CD1A,CERT1,CHKA,CSF2RB,CYP7A1,DTYMK,FABP7,FAS,FN1,G6PD,GTF21,HBB,HBEGF,HMOX1,HNRNPA2B1,IFNG,IGF1R,IMPA2,ITGB3,KIF11,KLK1,KYNU,MATK,MMP1,MMP2,MSH2,MUC1,NFATC1,NOTCH1,NR1I3,PAH,PK4,PGK1,PNMT,PPP2R1A,PTPRE,PTPRF,RAC1,RARA,RRM1,S100A6,SEN2,SERPINA5,SFN,SMTN,STK4,THBS2,TJP1,TLR4,TRIM21,WARS1,WEE1 | 30 | 59 |
| CD6                       | transmembrane receptor | 2.53E-10 | 2.50E-03 | CD6,ERK1/2,Jnk,P38 MAPK                                                                                                                                                                     | B2M,BTRC,CYP17A1,CYP7A1,DGKA,ESR1,F3,FAS,HBEGF,HK2,HMOX1,IFNG,IGF1R,ITGB3,MMP1,MMP2,MSH2,PTPRE,RARA,XIAP                                                                                                                                                                                                                                | 4  | 20 |
| MED28                     | other                  | 2.53E-10 | 2.50E-03 | ERK1/2,Jnk,MED28,P38 MAPK                                                                                                                                                                   | B2M,BTRC,CYP17A1,CYP7A1,DGKA,ESR1,F3,FAS,HBEGF,HK2,HMOX1,IFNG,IGF1R,ITGB3,MMP1,MMP2,MSH2,PTPRE,RARA,XIAP                                                                                                                                                                                                                                | 3  | 20 |
| RNF40                     | enzyme                 | 2.97E-10 | 1.30E-03 | Akt,ERK,RNF40                                                                                                                                                                               | CDK5R1,ESR1,F3,FAS,G6PD,HBEGF,IFNG,IGF1R,ITGB3,MMP1,MMP2,MUC1,NOTCH1,ODC1,PK4,PPARG,TJP1                                                                                                                                                                                                                                                | 3  | 17 |
| Pro-inflammatory Cytokine | group                  | 3.27E-10 | 7.90E-03 | ERK1/2,MTOR,NFkB (complex),P38 MAPK,Pro-inflammatory Cytokine,SMPD1,SMPD2                                                                                                                   | AR,B2M,CHKA,CTCF,CYP17A1,CYP7A1,DGKA,ESR1,F3,FAS,HBEGF,HK2,IFNG,IGF1R,ITGB3,KYNU,MMP1,MMP2,MUC1,NOTCH1,PTPRE,RARA,SEN2,XIAP                                                                                                                                                                                                             | 4  | 24 |
| S100A9                    | other                  | 3.39E-10 | 6.00E-03 | ERK1/2,Jnk,P38 MAPK,S100A9,TERT                                                                                                                                                             | AR,B2M,BTRC,CYP17A1,CYP7A1,DGKA,ESR1,F3,FAS,HBEGF,HK2,HMOX1,IFNG,IGF1R,ITGB3,MMP1,MMP2,MSH2,PTPRE,RARA,XIAP                                                                                                                                                                                                                             | 5  | 21 |
| CCN6                      | growth factor          | 3.40E-10 | 2.16E-02 | Akt,AKT1,AKT2,CCN6,CEBPB,ERBB2,ERK,FOXO1,Hsp27,IRF3,Jnk,KAT5,MAP3K7,MAPK1,MAPK9,MMP2,MTOR,NFkB (complex),NR3C1,P38 MAPK,PGR,PPARGC1A,RELA,RHOA,SREBF1,STAT1,TP63,YAP1                       | ALB,APEX1,BMP1,BTRC,C1R,CAMK4,CD1A,CDK5R1,CERT1,CHKA,CSF2RB,CYP7A1,DGKA,DTYMK,ERBB4,ESR1,F3,FABP3,FABP7,FAS,FN1,GART,HBB,HMOX1,ITGB3,KIF11,KYNU,MATK,MMP1,MMP2,MSH2,NFATC1,NR1I3,ODC1,PDHA1,PK4,PGK1,PNMT,PPP2R1A,PTPRF,RAC1,RARA,RRM1,SEM1,SEN2,SERPINA5,SFN,SMTN,STK4,THBS2,TRIM21,WEE1                                               | 26 | 52 |
| INS                       | other                  | 4.09E-10 | 8.10E-03 | Akt,AKT1,ERK,ERK1/2,GATA2,Gsk3,INS,INSR,Jnk,Mapk,MAPK1,MTOR,PI3K (complex),RPS6KB1,YAP1                                                                                                     | B2M,BTRC,CDK5R1,CHKA,CYP17A1,CYP7A1,DTYMK,EPHA3,ESR1,F3,FAS,FN1,HBB,HK2,HMOX1,IFNG,ITGB3,MMP1,MMP2,MSH2,MUC1,NOTCH1,NR1I3,ODC1,PPARG,PTPRE,RARA,RRM1,TJP1,TRIM21,XIAP,ZIC3                                                                                                                                                              | 15 | 32 |
| IFNG                      | cytokine               | 4.51E-10 | 3.33E-02 | Akt,ERK1/2,IFNG,IRF1,JAK2,MMP2,MTOR,NFkB (complex),P38 MAPK,PRKAA1,RELA,STAT1,STAT3,TP73                                                                                                    | C1R,CAMK4,CERT1,CHKA,CSF2RB,CTCF,CYP17A1,CYP7A1,DGKA,DPP4,EPHA3,ESR1,FAS,G6PD,GART,GRK2,HK2,ITGB3,KYNU,MAGEA4,MMP1,MMP2,MUC1,NOTCH1,ODC1,PK4,PGK1,PPARG,PPP2R1A,PTPRE,RARA,SEN2,SERPINA5,SFN,STK4,TJP1,TLR4,TRIM21,WARS1,XIAP,ZEB2                                                                                                      | 14 | 41 |

|                 |                        |          |          |                                                                                                                                                                 |                                                                                                                                                                                                                                                                                 |    |    |
|-----------------|------------------------|----------|----------|-----------------------------------------------------------------------------------------------------------------------------------------------------------------|---------------------------------------------------------------------------------------------------------------------------------------------------------------------------------------------------------------------------------------------------------------------------------|----|----|
| PTPRK           | phosphatase            | 4.69E-10 | 1.00E-03 | EGFR,ERK,PTPRK                                                                                                                                                  | AR,CDK5R1,ESR1,F3,FAS,HBEGF,HK2,HNRNPA2B1,ITGB3,MMP1,MMP2,MUC1,ODC1,PKK4,PTPRE,XIAP,ZEB2                                                                                                                                                                                        | 2  | 17 |
| G protein alpai | group                  | 4.69E-10 | 2.94E-02 | ADCY,AR,CEBPA,EGFR,ERK,ERK1/2,FOXO1,G protein alpai,GPIIB-IIIa,HIF1A,Jnk,MAP2K1/2,Mapk,MAPK1,MED1,MMP2,MTOR,NFkB (complex),P38MAPK,PGR,RELA,RHOA,SP1,STAT3,STK4 | ALB,AR,B2M,BTRC,CAMK4,CDK5R1,CHKA,CSF2RB,CYP17A1,CYP7A1,DGKA,DTYMK,EPHA3,ERBB4,ESR1,F3,FN1,HBB,HBEGF,HK2,HNRNPA2B1,IFNG,IGF1R,ITGB3,KIF11,KYNU,MATK,MMP1,MMP2,NAE1,NFATC1,NR1I3,ODC1,PDHA1,PGK1,PNMT,PPP2R1A,PTPRE,RARA,RRM1,SEN2,SERPINA5,SMTN,STK4,TLR4,TRIM21,WEE1,XIAP,ZEB2 | 22 | 49 |
| EDA             | cytokine               | 5.13E-10 | 1.00E-03 | EDA,EGFR,ERK                                                                                                                                                    | AR,CDK5R1,ESR1,F3,FAS,HBEGF,HK2,HNRNPA2B1,ITGB3,MMP1,MMP2,MUC1,ODC1,PKK4,PTPRE,XIAP,ZEB2                                                                                                                                                                                        | 2  | 17 |
| OGT             | enzyme                 | 5.18E-10 | 1.21E-02 | Akt,ERK1/2,NFkB (complex),OGT,PRKAA,RELA,SREBF1,YAP1                                                                                                            | AR,B2M,CERT1,CYP17A1,CYP7A1,DTYMK,ESR1,F3,FABP3,FABP7,FAS,FN1,HBEGF,HK2,HMOX1,IFNG,KYNU,MMP2,MSH2,MUC1,NOTCH1,PKK4,PPARG,PTPRE,RRM1,SEN2,STK4,TJP1,XIAP                                                                                                                         | 8  | 29 |
| mir-27          | microRNA               | 5.40E-10 | 5.00E-03 | ERK1/2,mir-27,NFkB (complex)                                                                                                                                    | B2M,CTCF,CYP17A1,CYP7A1,ESR1,FAS,FN1,HBEGF,HK2,HMOX1,IFNG,IGF1R,KYNU,MMP1,MMP2,MSH2,NOTCH1,PSAP,PTPRE,SEN2,XIAP                                                                                                                                                                 | 3  | 21 |
| PLAUR           | transmembrane receptor | 5.98E-10 | 4.40E-03 | AKT1,ERK,ERK1/2,MAPK1,MMP2,PLAUR                                                                                                                                | AR,B2M,CDK5R1,CSF2RB,CYP17A1,CYP7A1,ESR1,FAS,FN1,HBB,HK2,HMOX1,IFNG,IGF1R,ITGB3,MMP1,MMP2,MUC1,ODC1,PKK4,PPP2R1A,PTPRE,TJP1,TRIM21,XIAP                                                                                                                                         | 5  | 25 |
| ANXA6           | ion channel            | 6.12E-10 | 1.10E-03 | ANXA6,EGFR,ERK                                                                                                                                                  | AR,CDK5R1,ESR1,F3,FAS,HBEGF,HK2,HNRNPA2B1,ITGB3,MMP1,MMP2,MUC1,ODC1,PKK4,PTPRE,XIAP,ZEB2                                                                                                                                                                                        | 2  | 17 |
| SOS1            | other                  | 6.15E-10 | 5.90E-03 | ERK1/2,NFkB (complex),RAC1,RHOA,SOS1                                                                                                                            | B2M,CTCF,CYP17A1,CYP7A1,ESR1,FAS,FN1,HBEGF,HK2,HMOX1,IFNG,IGF1R,KYNU,MMP1,MMP2,MSH2,NOTCH1,PDHA1,PTPRE,SEN2,XIAP                                                                                                                                                                | 4  | 21 |
| RAD51AP1-DYRK4  | fusion gene/product    | 6.20E-10 | 2.03E-02 | Akt,ATR,CEBPA,EGFR,ERBB2,ERK,ERK1/2,ESR1,FOXO1,GSK3B,IKBKB,Jnk,MAP2K1/2,MAPK1,MED1,MMP2,NFkB (complex),RAD51AP1-DYRK4,SREBF2,STAT1,STAT5a/b,YBX1                | ALB,AR,B2M,BMP1,BTRC,C1R,CAMK4,CDK5R1,CSF2RB,CYP17A1,CYP7A1,DGKA,DTYMK,EPHA3,ERBB4,ESR1,F3,FABP7,FAP,FN1,GART,GTF2I,HBB,HBEGF,HK2,HNRNPA2B1,IGF1R,KIF11,KYNU,MSH2,MUC1,NOTCH1,ODC1,PKK4,PGK1,PPARG,PPP2R1A,PTPRE,PTPRF,RAC1,RARA,RBM39,SEN2,SMTN,TJP1,TRIM21,WARS1              | 21 | 47 |
| BDNF            | growth factor          | 6.63E-10 | 9.60E-03 | Akt,BDNF,ERK1/2,NFkB (complex),RELA,Src                                                                                                                         | B2M,CERT1,CYP17A1,CYP7A1,ESR1,F3,FAS,FN1,HBEGF,HK2,HMOX1,IFNG,KYNU,MMP1,MMP2,MSH2,MUC1,NOTCH1,PKK4,PPARG,PTPRE,SEN2,STK4,TJP1,XIAP                                                                                                                                              | 5  | 25 |
| INHBA           | growth factor          | 6.68E-10 | 1.71E-02 | Akt,CEBPA,CEBPB,EGFR,ERK1/2,ERN1,GSK3B,Hsp27,INHBA,Jnk,KAT5,MED1,MK                                                                                             | ALB,ANG,APEX1,B2M,BCR,BTRC,CD1A,CYP17A1,CYP7A1,DGKA,DTYMK,EPHA3,ERBB4,ESR1,F3,FABP7,FAP,FAS,GTF2I,HBB,HBEGF,HK2,HMO                                                                                                                                                             | 24 | 49 |

|                    |                                  |          |          |                                                                                                                                                                                       |                                                                                                                                                                                                                                                                                             |    |    |
|--------------------|----------------------------------|----------|----------|---------------------------------------------------------------------------------------------------------------------------------------------------------------------------------------|---------------------------------------------------------------------------------------------------------------------------------------------------------------------------------------------------------------------------------------------------------------------------------------------|----|----|
|                    |                                  |          |          | YC,NR3C1,P38<br>MAPK,PGR,SMAD2,SMAD3,SREBF2,STAT3,TFEB,TP63,YAP1,YBX1                                                                                                                 | X1,HNRNPA2B1,IFNG,ITGB3,MATK,MSH2,MUC1,NFATC1,NOTCH1,NR1I3,ODC1,PK4,PGK1,PNMT,PSAP,PTPRE,RAC1,RARA,RRM1,SERPINA5,SFN,THBS2,TJP1,VAV3,VPS26A,WEE1,XIAP                                                                                                                                       |    |    |
| PP2A               | complex                          | 6.89E-10 | 4.80E-03 | Akt,ERK1/2,MAPK8,Nfkb<br>(complex),PP2A,PRKAA,STAT5a/b                                                                                                                                | AR,B2M,CTCF,CYP17A1,CYP7A1,ESR1,F3,FAS,FN1,HBEGF,HK2,IFNG,IGF1R,KYNU,MSH2,MUC1,NOTCH1,PK4,PTPRE,RARA,SENP2,TJP1,XIAP                                                                                                                                                                        | 6  | 23 |
| G protein<br>alpha | group                            | 7.00E-10 | 8.00E-04 | ADCY,EGFR,ERK1/2,G protein alpha                                                                                                                                                      | AR,B2M,CYP17A1,CYP7A1,ESR1,F3,FN1,HBEGF,HK2,HNRNPA2B1,IFNG,IGF1R,MMP1,MMP2,NFATC1,PTPRE,XIAP,ZEB2                                                                                                                                                                                           | 3  | 18 |
| ERRFI1             | other                            | 7.35E-10 | 3.90E-03 | Akt,EGFR,ERRFI1,FOXO1,GSK3B,MET                                                                                                                                                       | AR,CAMK4,ESR1,F3,FN1,HK2,HMOX1,HNRNPA2B1,IFNG,IGF1R,KIF11,MMP1,MUC1,NOTCH1,PK4,PTPRE,RAC1,TJP1,XIAP,ZEB2                                                                                                                                                                                    | 5  | 20 |
| CXCR4              | G-protein<br>coupled<br>receptor | 7.68E-10 | 8.10E-03 | Akt,AKT1,CXCR4,ERK1/2,Jnk,MAPK1,P38<br>MAPK,Ras homolog,RHOA,ZAP70                                                                                                                    | AR,B2M,BTRC,CYP17A1,CYP7A1,DGKA,ESR1,F3,FAS,HBB,HBEGF,HK2,HMOX1,IFNG,ITGB3,MMP1,MMP2,MSH2,MUC1,NOTCH1,PDHA1,PK4,PTPRE,RARA,TJP1,TRIM21,XIAP                                                                                                                                                 | 10 | 27 |
| POSTN              | other                            | 7.76E-10 | 3.50E-03 | Akt,EGFR,ERK,POSTN                                                                                                                                                                    | AR,CDK5R1,ESR1,FAS,HBEGF,HK2,HNRNPA2B1,IGF1R,ITGB3,MMP1,MMP2,MUC1,NOTCH1,ODC1,PTPRE,TJP1,VEGFB,XIAP,ZEB2                                                                                                                                                                                    | 4  | 19 |
| WWOX               | enzyme                           | 8.42E-10 | 5.50E-03 | ERBB4,ERK,GSK3B,Nfkb<br>(complex),WWOX                                                                                                                                                | CDK5R1,CTCF,ESR1,HBEGF,HMOX1,IFNG,IGF1R,ITGB3,KYNU,MMP1,MMP2,MSH2,MUC1,NOTCH1,ODC1,PK4,PGK1,RAC1,SENP2,XIAP                                                                                                                                                                                 | 5  | 20 |
| SERPINC1           | enzyme                           | 9.37E-10 | 6.50E-03 | ERK1/2,F10,F2,Hsp27,JAK2,MAPK1,MAPK8,Nfkb (complex),P38<br>MAPK,PRKAA1,PRKCQ,PTK2B,RHOA,SERPINC1,SRC (family),VSIR                                                                    | AR,B2M,CD1A,CTCF,CYP17A1,CYP7A1,DGKA,EPA3,ESR1,F3,FN1,HBB,HBEGF,HK2,HMOX1,IFNG,ITGB3,KYNU,MAGEA4,MMP1,MMP2,MSH2,NOTCH1,PDHA1,PTPRE,RARA,SENP2,TJP1,TRIM21,XIAP                                                                                                                              | 15 | 30 |
| SMAD7              | transcription<br>regulator       | 9.54E-10 | 2.18E-02 | Akt,AKT1,CASP8,CEBPB,ERBB2,ERK,ERK1/2,ERN1,FOXO1,Hsp27,IRF3,Jnk,KAT5,MAP2K3,MAP3K7,MAPK1,MAPK9,MeK,MMP2,MTOR,NR3C1,P38<br>MAPK,PDPK1,PGR,RELA,RHOA,SMAD2,SMAD7,SREBF1,STAT1,TP63,YAP1 | ALB,ANG,APEX1,B2M,BMP1,BTRC,C1R,CAMK4,CD1A,CDK5R1,CERT1,CHK1,CSF2RB,CYP17A1,DGKA,DTYMK,ERBB4,F3,FABP3,FABP7,FAS,GART,HBB,HMOX1,IFNG,ITGB3,KIF11,MATK,MMP1,MSH2,NFATC1,NR1I3,ODC1,PDHA1,PK4,PGK1,PNMT,PPP2R1A,PTPRF,RAC1,RARA,RRM1,SENP1,SERPINA5,SFN,SMTN,STK4,THBS2,TRIM21,WARS1,WEE1,XIAP | 28 | 52 |
| ADCY               | group                            | 9.61E-10 | 3.40E-03 | ADCY,ERK,ERK1/2                                                                                                                                                                       | B2M,CDK5R1,CYP17A1,CYP7A1,ESR1,FAS,FN1,HBEGF,HK2,IFNG,IGF1R,ITGB3,MMP1,MMP2,MUC1,NFATC1,ODC1,PK4,PTPRE                                                                                                                                                                                      | 3  | 18 |
| EVL                | other                            | 9.63E-10 | 3.40E-03 | Akt,ERK1/2,EVL,Focal adhesion<br>kinase,NANOG,P38 MAPK,PXN                                                                                                                            | B2M,CYP17A1,CYP7A1,DGKA,ESR1,FAS,FN1,HBEGF,HK2,HMOX1,IFNG,IGF1R,ITGB3,MSH2,MUC1,NOTCH1,PK4,PTPRE,RARA,S100A6,TJP1,XIAP                                                                                                                                                                      | 4  | 22 |

|         |                            |          |          |                                                  |                                                                                                                                                                            |   |    |
|---------|----------------------------|----------|----------|--------------------------------------------------|----------------------------------------------------------------------------------------------------------------------------------------------------------------------------|---|----|
| GAS6    | growth factor              | 9.64E-10 | 6.30E-03 | Akt,AXL,EGFR,ERK,GAS6,MET,SRC (family)           | AR,CDK5R1,ESR1,FAS,FN1,HBEGF,HK2,HMOX1,HNRNPA2B1,IGF1R,ITGB3,MMP1,MMP2,MUC1,NOTCH1,ODC1,PTPRE,TJP1,XIAP,ZEB2                                                               | 6 | 20 |
| STAB2   | transmembrane receptor     | 9.64E-10 | 5.70E-03 | ERK1/2,NFkB (complex),STAB2                      | B2M,CTCF,CYP17A1,CYP7A1,ESR1,FAS,FN1,HBEGF,HK2,HMOX1,IFNG,IGF1R,KYNU,MMP1,MMP2,MSH2,NOTCH1,PTPRE,SENP2,XIAP                                                                | 2 | 20 |
| RPSA    | translation regulator      | 9.95E-10 | 1.10E-03 | ERK,MAPK8,MMP2,RHOA,RPSA                         | CDK5R1,CSF2RB,ESR1,FAS,HBEGF,IFNG,ITGB3,MMP1,MMP2,MUC1,ODC1,PDHA1,PDK4,PPP2R1A,RARA,TJP1                                                                                   | 5 | 16 |
| IL36G   | cytokine                   | 1.02E-09 | 9.60E-03 | ERK1/2,IL36G,Jnk,NFkB (complex)                  | B2M,BTRC,CD1A,CTCF,CYP17A1,CYP7A1,ESR1,FAS,FN1,HBEGF,HK2,HMOX1,IFNG,IGF1R,KYNU,MMP1,MMP2,NOTCH1,PTPRE,RARA,SENP2                                                           | 4 | 21 |
| HBEGF   | growth factor              | 1.02E-09 | 1.56E-02 | EGFR,ERBB2,ERBB4,ERK,ERK1/2,HBEGF,Mapk,P38 MAPK  | AR,B2M,BMP1,CDK5R1,CYP17A1,CYP7A1,DGKA,ERBB4,ESR1,GART,HK2,HMOX1,HNRNPA2B1,IGF1R,ITGB3,MMP1,MMP2,MSH2,MUC1,NR1I3,ODC1,PDK4,PGK1,PPARG,PTPRE,PTPRF,RARA,RRM1,SMTN,XIAP,ZEB2 | 8 | 31 |
| P2RY6   | G-protein coupled receptor | 1.03E-09 | 6.00E-03 | ERK1/2,NFkB (complex),P2RY6                      | B2M,CTCF,CYP17A1,CYP7A1,ESR1,FAS,FN1,HBEGF,HK2,HMOX1,IFNG,IGF1R,KYNU,MMP1,MMP2,MSH2,NOTCH1,PTPRE,SENP2,XIAP                                                                | 2 | 20 |
| IL36B   | cytokine                   | 1.09E-09 | 9.50E-03 | ERK1/2,IL36B,Jnk,NFkB (complex)                  | B2M,BTRC,CD1A,CTCF,CYP17A1,CYP7A1,ESR1,FAS,FN1,HBEGF,HK2,HMOX1,IFNG,IGF1R,KYNU,MMP1,MMP2,NOTCH1,PTPRE,RARA,SENP2                                                           | 4 | 21 |
| FURIN   | peptidase                  | 1.15E-09 | 6.90E-03 | AKT1,ERK1/2,FURIN,MMP9,P38 MAPK,RELA,SMAD2,SMAD3 | B2M,CERT1,CTCF,CYP17A1,CYP7A1,DGKA,ESR1,F3,FAS,HBEGF,HK2,HMOX1,IGF1R,ITGB3,MMP1,MMP2,MSH2,PPARG,PTPRE,RAC1,RARA,STK4,TJP1,XIAP                                             | 7 | 24 |
| PTK2    | kinase                     | 1.22E-09 | 9.70E-03 | Akt,ERK,IGF1R,LCK,MAPK8,MET,PTEN,PTK2,RHOA,YAP1  | AR,CDK5R1,DTYMK,F3,FAS,FN1,HBEGF,HMOX1,IFNG,IGF1R,ITGB3,MMP1,MMP2,MUC1,NOTCH1,ODC1,PDHA1,PPARG,RAC1,RARA,RRM1,TJP1                                                         | 9 | 22 |
| PIP5K1C | kinase                     | 1.31E-09 | 1.80E-03 | Akt,EGFR,PIP5K1C                                 | AR,ESR1,F3,HK2,HNRNPA2B1,IFNG,IGF1R,MMP1,MMP2,MUC1,NOTCH1,PDK4,PTPRE,TJP1,XIAP,ZEB2                                                                                        | 2 | 16 |
| ITGA3   | other                      | 1.31E-09 | 4.30E-03 | ERK,ERK1/2,ITGA3,RHOA,SRC                        | B2M,CDK5R1,CYP17A1,CYP7A1,ESR1,FAS,FN1,HK2,IFNG,IGF1R,ITGB3,MMP1,MMP2,MUC1,ODC1,PDHA1,PDK4,PTPRE                                                                           | 4 | 18 |
| NOX5    | ion channel                | 1.34E-09 | 1.00E-02 | Akt,ERK1/2,NOX5,P38 MAPK,RELA,STAT5a/b           | B2M,CERT1,CTCF,CYP17A1,CYP7A1,DGKA,ESR1,FAS,HBEGF,HK2,HMOX1,IFNG,ITGB3,MMP1,MMP2,MSH2,MUC1,NOTCH1,PDK4,PPARG,PTPRE,RARA,STK4,TJP1                                          | 5 | 24 |
| S1PR2   | G-protein coupled receptor | 1.42E-09 | 8.30E-03 | Akt,EGFR,ERK1/2,RELA,S1PR2                       | AR,B2M,CERT1,CTCF,CYP17A1,CYP7A1,ESR1,FAS,FN1,HBEGF,HK2,HNRNPA2B1,MMP1,MMP2,MUC1,NOTCH1,PDK4,PPARG,PTPRE,STK4,TJP1,XIAP,ZEB2                                               | 4 | 23 |

|        |                                   |          |          |                                                                                              |                                                                                                                                                           |    |    |
|--------|-----------------------------------|----------|----------|----------------------------------------------------------------------------------------------|-----------------------------------------------------------------------------------------------------------------------------------------------------------|----|----|
| VTN    | other                             | 1.48E-09 | 5.60E-03 | Akt,ERK1/2,MTOR,VTN                                                                          | AR,B2M,CHKA,CYP17A1,CYP7A1,ESR1,F3,FN1,HBEGF,HK2,IFNG,MMP1,MMP2,MUC1,NOTCH1,PK4,PTPRE,SFN,TJP1                                                            | 4  | 19 |
| NR5A2  | ligand-dependent nuclear receptor | 1.50E-09 | 2.52E-02 | ERK1/2,ERN1,FOXO1,NFkB (complex),NR5A2,PRKAA,SMAD2,SMAD3,SREBF1,SREBF2                       | ANG,AR,B2M,CAMK4,CTCF,CYP17A1,CYP7A1,ESR1,FABP3,FABP7,FAS,FGF1R,GTF2I,HBEGF,HK2,IFNG,IGF1R,KIF11,KYNU,MMP1,MMP2,MSH2,NOTCH1,PPARG,PTPRE,RAC1,SENP2,XIAP   | 9  | 28 |
| PDE4A  | enzyme                            | 1.52E-09 | 3.70E-03 | ERK1/2,P38 MAPK,PDE4A                                                                        | B2M,CYP17A1,CYP7A1,DGKA,ESR1,F3,FAS,FN1,HBEGF,HK2,HMOX1,IGF1R,ITGB3,MMP1,MMP2,MSH2,PTPRE,RARA                                                             | 3  | 18 |
| A2M    | transporter                       | 1.53E-09 | 9.30E-03 | A2M,Akt,ERK1/2,MAP2K1/2,MMP2,P38 MAPK                                                        | B2M,CSF2RB,CYP17A1,CYP7A1,DGKA,ESR1,FAS,HBEGF,HK2,HMOX1,ITGB3,MMP1,MMP2,MSH2,MUC1,NOTCH1,PK4,PPP2R1A,PTPRE,RARA,RRM1,XIAP                                 | 6  | 22 |
| MAP3K8 | kinase                            | 1.68E-09 | 1.10E-02 | CHUK,ERK1/2,MAP2K1,MAP3K8,NFkB (complex)                                                     | B2M,CTCF,CYP17A1,CYP7A1,ESR1,F3,FAS,FN1,HBEGF,HK2,HMOX1,IFNG,IGF1R,KYNU,MMP1,MMP2,MSH2,NOTCH1,PTPRE,SENP2,XIAP                                            | 4  | 21 |
| PRTN3  | peptidase                         | 1.97E-09 | 7.20E-03 | CXCL8,ERK1/2,IL1B,PRTN3                                                                      | ACP3,AR,B2M,BTRC,CD74,CYP17A1,CYP7A1,DPP4,ESR1,F3,FAS,FN1,HBEGF,HK2,IFNG,IGF1R,MMP1,MMP2,MUC1,PPARG,PTPRE,RAC1,TLR4                                       | 3  | 23 |
| VDAC1  | ion channel                       | 1.98E-09 | 1.62E-02 | CASP8,CASP9,ERK1/2,IL1B,Inflammasome (Nalp3, Asc, Casp1),MAPK8,NFkB (complex),P38 MAPK,VDAC1 | ACP3,B2M,BTRC,CTCF,CYP17A1,CYP7A1,DGKA,DPP4,ESR1,F3,FAS,HBEGF,HK2,IFNG,IGF1R,ITGB3,KYNU,MMP1,MMP2,MUC1,NOTCH1,PPARG,PTPRE,RARA,SENP2,TLR4,XIAP            | 5  | 27 |
| BAX    | transporter                       | 2.07E-09 | 1.83E-02 | BAX,CASP8,CASP9,ERK1/2,IRF3,MAPK8,NFkB (complex),P38 MAPK                                    | B2M,CTCF,CYP17A1,CYP7A1,DGKA,ESR1,F3,FAS,FN1,HBEGF,HK2,IFNG,IGF1R,ITGB3,KYNU,MMP1,MMP2,NOTCH1,PTPRE,RARA,SENP2,STK4,XIAP                                  | 5  | 23 |
| LAIR1  | transmembrane receptor            | 2.09E-09 | 4.90E-03 | ERK,LAIR1,MAPK9,P38 MAPK                                                                     | CDK5R1,DGKA,ESR1,F3,FN1,HBEGF,HMOX1,IFNG,ITGB3,MMP1,MMP2,MSH2,MUC1,ODC1,PK4,PPARG,RAC1,RARA,SEM1                                                          | 4  | 19 |
| HRAS   | enzyme                            | 2.09E-09 | 8.40E-03 | CHUK,ERK,ERK1/2,HRAS,IKBKB                                                                   | B2M,CDK5R1,CYP17A1,CYP7A1,DGKA,ESR1,FAS,FN1,HK2,HMOX1,IFNG,IGF1R,ITGB3,MMP1,MMP2,NOTCH1,ODC1,PK4,PTPRE                                                    | 5  | 19 |
| SMPD2  | enzyme                            | 2.11E-09 | 9.10E-03 | ERK1/2,NFkB (complex),SMPD2                                                                  | B2M,CTCF,CYP17A1,CYP7A1,ESR1,FAS,FN1,HBEGF,HK2,HMOX1,IFNG,IGF1R,KYNU,MMP1,MMP2,MSH2,NOTCH1,PTPRE,SENP2,XIAP                                               | 2  | 20 |
| KITLG  | growth factor                     | 2.16E-09 | 2.82E-02 | Akt,ERK1/2,JUN,KITLG,Mapk,MAPK8,MTOR,P38 MAPK,RELA,RPS6KB1,STAT3,TERT                        | AR,B2M,CERT1,CHKA,CTCF,CYP17A1,CYP7A1,DGKA,ESR1,FAS,HBEGF,HK2,HMOX1,IFNG,ITGB3,MMP1,MMP2,MSH2,MUC1,NOTCH1,NR1H3,PK4,PGK1,PPARG,PRKCB,PTPRE,RARA,STK4,TJP1 | 12 | 29 |

|          |           |          |          |                                                                                         |                                                                                                                                                                                            |    |    |
|----------|-----------|----------|----------|-----------------------------------------------------------------------------------------|--------------------------------------------------------------------------------------------------------------------------------------------------------------------------------------------|----|----|
| Ggtase I | complex   | 2.16E-09 | 1.51E-02 | Akt,AKT1,AR,ERBB4,ERK1/2,FOXO1,Ggtase<br>I,HTRA2,Jnk,LATS1,PLK1,RELA,STK3,STK4,YAP1     | B2M,BTRC,CAMK4,CERT1,CTCF,CYP17A1,CYP7A1,DTYMK,F3,FAS,FN1,HBEGF,HK2,HMOX1,KIF11,MSH2,MUC1,NOTCH1,PK4,PGK1,PPARG,PTPRE,RARA,RRM1,SFN,SMTN,TJP1,TLR4,WEE1,XIAP                               | 12 | 30 |
| PDE4D    | enzyme    | 2.21E-09 | 5.10E-03 | ERK1/2,P38 MAPK,PDE4D                                                                   | B2M,CYP17A1,CYP7A1,DGKA,ESR1,F3,FAS,FN1,HBEGF,HK2,HMOX1,IGF1R,ITGB3,MMP1,MMP2,MSH2,PTPRE,RARA                                                                                              | 3  | 18 |
| GALNT4   | enzyme    | 2.29E-09 | 2.69E-02 | ERK1/2,ERN1,FOXO1,GALNT4,NFkB (complex),PRKAA,SMAD2,SMAD3                               | ANG,AR,B2M,CAMK4,CTCF,CYP17A1,CYP7A1,ESR1,FAS,FN1,HBEGF,HK2,IFNG,IGF1R,KIF11,KYNU,MMP1,MMP2,MSH2,NOTCH1,PTPRE,RAC1,SENP2,TJP1,XIAP                                                         | 8  | 25 |
| Mmp      | group     | 2.37E-09 | 1.61E-02 | EGFR,ERK,ERK1/2,Mmp,TGFB1                                                               | ALB,AR,B2M,BMP1,CDK5R1,CYP17A1,CYP7A1,ESR1,F3,FAP,FAS,HK2,HMOX1,HNRNPA2B1,IGF1R,ITGB3,MMP2,MUC1,ODC1,PK4,PTPRE,SMTN,SMURF2,TJP1,XIAP,ZEB2                                                  | 5  | 26 |
| ITSN1    | other     | 2.40E-09 | 1.14E-02 | ERK,ERK1/2,ITSN1,MAP2K1/2,P38 MAPK                                                      | B2M,CDK5R1,CYP17A1,CYP7A1,DGKA,ESR1,F3,HK2,HMOX1,IFNG,IGF1R,ITGB3,MMP1,MMP2,MSH2,MUC1,ODC1,PK4,PTPRE,RARA,RRM1                                                                             | 4  | 21 |
| CIB1     | other     | 2.44E-09 | 3.40E-03 | Akt,CIB1,ERK,MAP3K5,PAK1                                                                | CDK5R1,ESR1,F3,FAS,FN1,HBEGF,IFNG,IGF1R,ITGB3,MMP1,MMP2,MSH2,MUC1,NOTCH1,ODC1,TJP1                                                                                                         | 4  | 16 |
| CDKN1A   | kinase    | 2.44E-09 | 1.15E-02 | CCND1,CDKN1A,ERK1/2,Jnk,MAPK9,NFkB (complex),RB1,RELA                                   | AR,B2M,BTRC,CERT1,CTCF,CYP17A1,CYP7A1,ESR1,FN1,G6PD,HBEGF,HK2,IGF1R,ITGB3,KYNU,MMP1,MSH2,NCOA3,NOTCH1,PPARG,PSAP,PTPRE,RAC1,RRM1,SEM1,SENP2,STK4,XIAP,ZEB2                                 | 9  | 29 |
| SULF2    | enzyme    | 2.53E-09 | 1.99E-02 | Akt,CEBPA,ERK1/2,ERN1,Jnk,MED1,MM P2,NFkB (complex),SMAD2,SMAD3,SREBF2,STAT1,SULF2,YBX1 | ALB,ANG,B2M,BTRC,C1R,CSF2RB,CYP17A1,CYP7A1,DTYMK,EPA3,ESR1,F3,FABP7,FN1,GTF2I,HBB,HBEGF,HK2,IFNG,IGF1R,KYNU,MMP1,MSH2,MUC1,NOTCH1,PK4,PPP2R1A,PTPRE,RAC1,RARA,SENP2,TJP1,TRIM21,WARS1,XIAP | 13 | 35 |
| SYK/ZAP  | group     | 2.55E-09 | 4.60E-03 | ERK1/2,P38 MAPK,RPS6KB1,SYK/ZAP                                                         | B2M,CYP17A1,CYP7A1,DGKA,ESR1,F3,FAS,HBEGF,HK2,HMOX1,IGF1R,ITGB3,MMP1,MMP2,MSH2,MUC1,PTPRE,RARA                                                                                             | 3  | 18 |
| RAP1A    | enzyme    | 2.55E-09 | 9.80E-03 | ERK,ERK1/2,P38 MAPK,RAC1,RAP1A                                                          | B2M,CDK5R1,CYP17A1,CYP7A1,DGKA,ESR1,F3,HK2,HMOX1,IFNG,IGF1R,ITGB3,MMP1,MMP2,MSH2,MUC1,ODC1,PK4,PTPRE,RARA                                                                                  | 4  | 20 |
| G6PD     | enzyme    | 2.59E-09 | 1.30E-02 | ERK1/2,G6PD,NFkB (complex),P38 MAPK,RELA                                                | B2M,CERT1,CYP17A1,CYP7A1,DGKA,ESR1,F3,FAS,HBEGF,HK2,IFNG,IGF1R,ITGB3,KYNU,MMP1,MMP2,NOTCH1,PPARG,PTPRE,RAC1,RARA,SENP2,STK4,XIAP                                                           | 5  | 24 |
| ADAM10   | peptidase | 2.70E-09 | 6.90E-03 | ADAM10,EGFR,ERK1/2,MDM2,P38 MAPK,Ras homolog                                            | AR,B2M,CYP17A1,CYP7A1,DGKA,ESR1,F3,FAS,HBEGF,HK2,HNRNPA2B1,IFNG,ITGB3,MMP1,MSH2,PTPRE,RARA,SFN,TJP1,XIAP,ZEB2                                                                              | 5  | 21 |



|         |                         |          |          |                                                                                                                                         |                                                                                                                                                                                                                                                  |    |    |
|---------|-------------------------|----------|----------|-----------------------------------------------------------------------------------------------------------------------------------------|--------------------------------------------------------------------------------------------------------------------------------------------------------------------------------------------------------------------------------------------------|----|----|
| GAB1    | other                   | 2.70E-09 | 2.06E-02 | Akt,ERK,ERK1/2,GAB1,NFkB (complex),SRC                                                                                                  | B2M,CDK5R1,CTCF,CYP17A1,CYP7A1,ESR1,F3,FN1,HK2,HMOX1,IFNG,ITGB3,KYNU,MMP1,MMP2,MSH2,MUC1,NOTCH1,ODC1,PTPRE,SENP2,TJP1,XIAP                                                                                                                       | 5  | 23 |
| AGK     | kinase                  | 2.73E-09 | 3.30E-03 | AGK,EGFR,ERK1/2                                                                                                                         | AR,B2M,CYP17A1,CYP7A1,ESR1,F3,FN1,HBEGF,HK2,HNRNPA2B1,IFNG,IGF1R,MMP1,MMP2,PTPRE,XIAP,ZEB2                                                                                                                                                       | 2  | 17 |
| FCHSD2  | other                   | 2.74E-09 | 6.30E-03 | Akt,EGFR,ERK1/2,FCHSD2                                                                                                                  | AR,B2M,CYP17A1,CYP7A1,ESR1,FN1,HBEGF,HK2,HNRNPA2B1,IFNG,MMP1,MMP2,MUC1,NOTCH1,PKD4,PTPRE,TJP1,XIAP,ZEB2                                                                                                                                          | 3  | 19 |
| PACSIN2 | transporter             | 2.74E-09 | 6.30E-03 | Akt,EGFR,ERK1/2,PACSIN2                                                                                                                 | AR,B2M,CYP17A1,CYP7A1,ESR1,FN1,HBEGF,HK2,HNRNPA2B1,IFNG,MMP1,MMP2,MUC1,NOTCH1,PKD4,PTPRE,TJP1,XIAP,ZEB2                                                                                                                                          | 3  | 19 |
| HMGB1   | transcription regulator | 2.90E-09 | 2.67E-02 | ERK1/2,HIF1A,HMGB1,IRF3,Jnk,MAPK8,P38 MAPK,RAC1                                                                                         | B2M,BTRC,CYP17A1,CYP7A1,DGKA,ERBB4,ESR1,F3,FAS,HBEGF,HK2,HDRB1,HMOX1,IFNG,IGF1R,ITGB3,MMP1,MMP2,MSH2,MUC1,NAE1,PTPRE,RARA,STK4,XIAP                                                                                                              | 8  | 25 |
| EREG    | growth factor           | 2.90E-09 | 2.40E-03 | Akt,EGFR,EREG                                                                                                                           | AR,ESR1,HBEGF,HK2,HNRNPA2B1,IFNG,IGF1R,MMP1,MMP2,MUC1,NOTCH1,PKD4,PTPRE,TJP1,XIAP,ZEB2                                                                                                                                                           | 3  | 16 |
| TLR10   | transmembrane receptor  | 2.95E-09 | 7.60E-03 | ERK,Jnk,P38 MAPK,TLR10                                                                                                                  | BTRC,CDK5R1,DGKA,ESR1,F3,FN1,HBEGF,HMOX1,IFNG,ITGB3,MMP1,MMP2,MSH2,MUC1,ODC1,PKD4,RARA,XIAP                                                                                                                                                      | 3  | 18 |
| MAP3K20 | kinase                  | 2.95E-09 | 7.60E-03 | ERK,Jnk,MAP3K20,P38 MAPK                                                                                                                | BTRC,CDK5R1,DGKA,ESR1,F3,FN1,HBEGF,HMOX1,IFNG,ITGB3,MMP1,MMP2,MSH2,MUC1,ODC1,PKD4,RARA,XIAP                                                                                                                                                      | 3  | 18 |
| ADAM9   | peptidase               | 2.95E-09 | 3.40E-03 | ADAM9,EGFR,ERK1/2                                                                                                                       | AR,B2M,CYP17A1,CYP7A1,ESR1,F3,FN1,HBEGF,HK2,HNRNPA2B1,IFNG,IGF1R,MMP1,MMP2,PTPRE,XIAP,ZEB2                                                                                                                                                       | 2  | 17 |
| SNX1    | transporter             | 2.95E-09 | 3.30E-03 | EGFR,ERK1/2,SNX1                                                                                                                        | AR,B2M,CYP17A1,CYP7A1,ESR1,F3,FN1,HBEGF,HK2,HNRNPA2B1,IFNG,IGF1R,MMP1,MMP2,PTPRE,XIAP,ZEB2                                                                                                                                                       | 2  | 17 |
| GAPDH   | enzyme                  | 2.99E-09 | 4.33E-02 | Akt,CEBPB,EGFR,EIF2AK2,GAPDH,Hsp27,IRF3,Jnk,KAT5,MMP2,MTOR,NFkB (complex),NR3C1,P38 MAPK,PGR,PPARGC1A,RPS6KB1,SP1,STAT1,STAT3,TP63,YAP1 | ALB,APEX1,BTRC,C1R,CD1A,CHKA,CSF2RB,CTCF,CYP7A1,DGKA,DTYMK,F3,FAS,FN1,HBEGF,HMOX1,HNRNPA2B1,ITGB3,KYNU,MATK,MMP1,MMP2,MSH2,MUC1,NFATC1,NR1I3,PKD4,PGK1,PNMT,PPARG,PPP2R1A,PTPRE,RARA,RRM1,SENP2,SERPINA5,SFN,STK4,THBS2,TRIM21,WARS1,WEE1,ZNF292 | 22 | 43 |
| HCG11   | other                   | 3.17E-09 | 7.60E-03 | ERK,HCG11,Jnk,P38 MAPK                                                                                                                  | BTRC,CDK5R1,DGKA,ESR1,F3,FN1,HBEGF,HMOX1,IFNG,ITGB3,MMP1,MMP2,MSH2,MUC1,ODC1,PKD4,RARA,XIAP                                                                                                                                                      | 3  | 18 |
| CG      | complex                 | 3.18E-09 | 2.90E-02 | ADCY,Akt,CG,EGFR,ERK1/2,MAPK1,MAPK8,Mek,MMP2,NFkB (complex)                                                                             | ACP3,AR,B2M,C1R,CDK5R1,CSF2RB,CTCF,CYP7A1,FAS,FN1,HBB,HBEGF,HK2,HMOX1,HNRNPA2B1,IFNG,IFNGR1,ITGB3,KYNU,MMP1,MMP2,MS                                                                                                                              | 10 | 33 |

|         |                            |          |          |                                                                                 |                                                                                                                                                                                               |    |    |
|---------|----------------------------|----------|----------|---------------------------------------------------------------------------------|-----------------------------------------------------------------------------------------------------------------------------------------------------------------------------------------------|----|----|
|         |                            |          |          |                                                                                 | H2,MUC1,NFATC1,PKD4,PPP2R1A,PTPRE,RARA,SENP2,SMURF2,TRIM21, XIAP,ZEB2                                                                                                                         |    |    |
| FRY     | other                      | 3.18E-09 | 2.28E-02 | ERBB4,ERK1/2,FRY,MYC,P38 MAPK,RELA,STK38,YAP1                                   | B2M,BCR,CERT1,CTCF,CYP17A1,CYP7A1,DGKA,DTYMK,ESR1,F3,FAP,F AS,HBEGF,HK2,HMOX1,IFNG,IGF1R,ITGB3,MMP1,MMP2,MSH2,ODC1,PG K1,PPARG,PTPRE,RARA,RRM1,STK4                                           | 6  | 28 |
| HTATIP2 | transcription regulator    | 3.19E-09 | 3.70E-03 | EGFR,ERK1/2,HTATIP2                                                             | AR,B2M,CYP17A1,CYP7A1,ESR1,F3,FN1,HBEGF,HK2,HNRNPA2B1,IFNG,I GF1R,MMP1,MMP2,PTPRE,XIAP,ZEB2                                                                                                   | 3  | 17 |
| GRP     | growth factor              | 3.19E-09 | 3.60E-03 | EGFR,ERK1/2,GRP                                                                 | AR,B2M,CYP17A1,CYP7A1,ESR1,F3,FN1,HBEGF,HK2,HNRNPA2B1,IFNG,I GF1R,MMP1,MMP2,PTPRE,XIAP,ZEB2                                                                                                   | 2  | 17 |
| Gpcr    | group                      | 3.19E-09 | 3.70E-03 | EGFR,ERK1/2,Gpcr,PRKD1                                                          | AR,B2M,CYP17A1,CYP7A1,ESR1,F3,FN1,HBEGF,HK2,HNRNPA2B1,IFNG,I GF1R,MMP1,MMP2,PTPRE,XIAP,ZEB2                                                                                                   | 3  | 17 |
| KL      | enzyme                     | 3.20E-09 | 2.02E-02 | Akt,CEBPA,ERK1/2,FOXO1,GSK3B,Jnk,K L,MED1,MMP2,NFkB (complex),SREBF2,STAT1,YBX1 | ALB,B2M,BTRC,C1R,CAMK4,CSF2RB,CYP17A1,CYP7A1,DTYMK,EPAH3, ESR1,F3,FABP7,FN1,GTF2I,HBB,HBEGF,HK2,IGF1R,KIF11,KYNU,MMP1, MSH2,MUC1,NOTCH1,PKD4,PPP2R1A,PTPRE,RAC1,RARA,SENP2,TJP1,T RIM21,WARS1 | 12 | 34 |
| TFF2    | other                      | 3.43E-09 | 4.50E-03 | ERK1/2,Jnk,TFF2                                                                 | B2M,BTRC,CYP17A1,CYP7A1,ESR1,FN1,HBEGF,HK2,IFNG,IGF1R,MMP1, MMP2,MSH2,PTPRE,RARA,XIAP                                                                                                         | 2  | 16 |
| IL17RD  | other                      | 3.44E-09 | 5.60E-03 | ERK,ERK1/2,IL17RD                                                               | B2M,CDK5R1,CYP17A1,CYP7A1,ESR1,FAS,FN1,HK2,IFNG,IGF1R,ITGB3, MMP1,MMP2,MUC1,ODC1,PKD4,PTPRE                                                                                                   | 2  | 17 |
| TP63    | transcription regulator    | 3.68E-09 | 1.72E-02 | Akt,ERK,ERK1/2,GSK3B,Jnk,STAT3,TP63 ,TP73,WWTR1                                 | B2M,BTRC,CDK5R1,CYP17A1,CYP7A1,DTYMK,ESR1,F3,FAS,G6PD,HBEG F,HK2,HMOX1,IGF1R,ITGB3,MSH2,NOTCH1,ODC1,PKD4,PGK1,PTPRE,R AC1,RARA,RRM1,SNF,THBS2,TJP1,WEE1,XIAP,ZEB2                             | 9  | 30 |
| SAA     | group                      | 3.68E-09 | 2.10E-02 | Akt,ERK1/2,NFkB (complex),P38 MAPK,SAA                                          | B2M,CTCF,CYP17A1,CYP7A1,DGKA,ESR1,F3,FAS,HBEGF,HK2,IFNG,ITG B3,KYNU,MMP1,MMP2,MUC1,NOTCH1,PKD4,PTPRE,RARA,SENP2,TJP1, XIAP                                                                    | 5  | 23 |
| SP4     | transcription regulator    | 3.68E-09 | 1.09E-02 | Akt,ERK,ERK1/2,Mapk,NFkB (complex),PRKAA,RAS,SP4                                | AR,B2M,CDK5R1,CTCF,CYP17A1,CYP7A1,ESR1,F3,FN1,HK2,HMOX1,IFN G,IGF1R,ITGB3,KYNU,MSH2,MUC1,NR1I3,ODC1,PTPRE,SENP2,TJP1,XIA P                                                                    | 8  | 23 |
| CXCR2   | G-protein coupled receptor | 3.73E-09 | 4.70E-03 | CXCR2,ERK1/2,Jnk                                                                | B2M,BTRC,CYP17A1,CYP7A1,ESR1,FN1,HBEGF,HK2,IFNG,IGF1R,MMP1, MMP2,MSH2,PTPRE,RARA,XIAP                                                                                                         | 2  | 16 |

|                             |                                  |          |          |                                                                                                                                                                              |                                                                                                                                                                                                                                                                                                    |    |    |
|-----------------------------|----------------------------------|----------|----------|------------------------------------------------------------------------------------------------------------------------------------------------------------------------------|----------------------------------------------------------------------------------------------------------------------------------------------------------------------------------------------------------------------------------------------------------------------------------------------------|----|----|
| KLHL42                      | other                            | 3.81E-09 | 6.80E-03 | ERK,ERN1,KLHL42,NFkB<br>(complex),PPP2R5E,SMAD2                                                                                                                              | ANG,CDK5R1,CTCF,ESR1,FAS,FN1,HBEGF,HMOX1,ITGB3,KYNU,MMP2,<br>MSH2,MUC1,NOTCH1,ODC1,PKD4,RAC1,SENP2,XIAP                                                                                                                                                                                            | 5  | 19 |
| PSMD14                      | peptidase                        | 3.82E-09 | 2.58E-02 | 26s<br>Proteasome,EGFR,ERK1/2,HIF1A,Jnk,JUN<br>,MMP2,NR3C1,PSMD14,STAT3                                                                                                      | AR,B2M,BTRC,CSF2RB,CYP17A1,CYP7A1,ERBB4,F3,FN1,HBEGF,HK2,H<br>MOX1,HNRNPA2B1,IFNG,ITGB3,MMP1,MMP2,MSH2,MUC1,NAE1,NFATC<br>1,NOTCH1,NR1I3,PGK1,PPP2R1A,PSAP,RARA,TJP1,XIAP,ZEB2                                                                                                                     | 9  | 30 |
| DDR2                        | kinase                           | 3.87E-09 | 1.15E-02 | DDR2,ERK1/2,JAK2,MAPT,MMP14,MMP<br>2,SRC,STAT1,STAT3                                                                                                                         | B2M,C1R,CSF2RB,CYP17A1,CYP7A1,ESR1,FAS,FN1,HBEGF,HK2,HMOX1,<br>IGF1R,MMP1,MMP2,MUC1,NOTCH1,PGK1,PPP2R1A,PTPRE,RARA,TJP1,T<br>RIM21,WARS1                                                                                                                                                           | 7  | 23 |
| ADCYAP1                     | other                            | 3.93E-09 | 1.24E-02 | ADCYAP1,ERK,ERK1/2,P38 MAPK                                                                                                                                                  | B2M,CDK5R1,CYP17A1,CYP7A1,DGKA,ESR1,F3,HK2,HMOX1,IFNG,IGF1<br>R,ITGB3,MMP1,MMP2,MSH2,MUC1,ODC1,PKD4,PTPRE,RARA                                                                                                                                                                                     | 3  | 20 |
| Focal<br>adhesion<br>kinase | group                            | 4.06E-09 | 3.10E-03 | ERK1/2,Focal adhesion kinase,NANOG,P38<br>MAPK                                                                                                                               | B2M,CYP17A1,CYP7A1,DGKA,ESR1,F3,FAS,FN1,HBEGF,HK2,HMOX1,IFN<br>GR1,IGF1R,ITGB3,MSH2,PTPRE,RARA,S100A6,XIAP                                                                                                                                                                                         | 3  | 19 |
| TP73-AS1                    | other                            | 4.07E-09 | 4.81E-02 | Akt,CCAR2,ELAVL1,ERK,ERK1/2,FOXO<br>1,HSF1,IRF3,MMP2,MTOR,NFkB<br>(complex),Notch,P38 MAPK,PI3K<br>(family),RELA,RHOA,SIRT1,SREBF1,SRE<br>BF2,STAT1,STAT3,TFEB,TP53,TP73-AS1 | AR,B2M,C1R,CAMK4,CDK5R1,CERT1,CHKA,CSF2RB,CTCF,CYP17A1,CY<br>P7A1,DGKA,EP300,ESR1,F3,FABP3,FABP7,GART,GTF2I,HBEGF,HMOX1,H<br>SP90AB1,IFNG,ITGB3,KIF11,KYNU,MMP2,MUC1,NDC80,NMRK1,PANK1,<br>PDHA1,PKD4,PGK1,PPP2R1A,PRKCB,PSAP,SENP2,SFN,STK4,TJP1,TRIM2<br>1,TTR,VPS26A,WARS1,WEE1,XIAP,YWHAH,ZEB2 | 23 | 49 |
| PIK3CA                      | kinase                           | 4.16E-09 | 1.30E-02 | Akt,AKT1,ERK1/2,FOXO1,GSK3B,MTOR<br>,PI3K (family),PIK3CA                                                                                                                    | B2M,CAMK4,CHKA,CYP17A1,CYP7A1,ESR1,F3,FN1,HBEGF,HK2,HMOX1,<br>IFNG,IGF1R,KIF11,MMP1,MUC1,NOTCH1,PKD4,PTPRE,RAC1,TJP1,XIAP                                                                                                                                                                          | 7  | 22 |
| CCR7                        | G-protein<br>coupled<br>receptor | 4.20E-09 | 5.80E-03 | Akt,CCR7,ERK1/2,LCK,MAP2K1/2                                                                                                                                                 | B2M,CYP17A1,CYP7A1,ESR1,F3,FN1,HBEGF,HK2,IFNG,MMP1,MMP2,MU<br>C1,NOTCH1,PKD4,PPARG,PTPRE,RRM1,TJP1                                                                                                                                                                                                 | 4  | 18 |
| P2RY1                       | G-protein<br>coupled<br>receptor | 4.22E-09 | 2.70E-02 | DGKA,ERK,ERK1/2,NFkB<br>(complex),P2RY1,P38<br>MAPK,PLC,RAC1,RAP1B,RELA                                                                                                      | B2M,CDK5R1,CERT1,CYP17A1,CYP7A1,DGKA,ESR1,F3,HK2,IFNG,IGF1R,<br>ITGB3,KYNU,MMP1,MMP2,MUC1,NOTCH1,ODC1,PKD4,PPARG,PTPRE,R<br>ARA,SENP2,STK4,WEE1,XIAP                                                                                                                                               | 7  | 26 |
| GALNT2                      | enzyme                           | 4.34E-09 | 8.10E-03 | Akt,EGFR,ERK1/2,GALNT2,SRC                                                                                                                                                   | AR,B2M,CYP17A1,CYP7A1,ESR1,FN1,HBEGF,HK2,HNRNPA2B1,IFNG,MM<br>P1,MMP2,MUC1,NOTCH1,PKD4,PTPRE,TJP1,XIAP,ZEB2                                                                                                                                                                                        | 4  | 19 |
| CGN                         | other                            | 4.44E-09 | 1.22E-02 | ARHGEF2,CGN,ERK1/2,NFkB<br>(complex),RHOA,Tgf beta                                                                                                                           | B2M,CTCF,CYP17A1,CYP7A1,ESR1,FAS,FN1,HBEGF,HK2,HMOX1,IFNG,I<br>GF1R,KYNU,MMP2,MSH2,NOTCH1,PDHA1,PTPRE,SENP2,XIAP                                                                                                                                                                                   | 4  | 20 |
| DUSP6                       | phosphatase                      | 4.53E-09 | 1.35E-02 | DUSP6,ERK,ERK1/2,PGR                                                                                                                                                         | B2M,CDK5R1,CYP17A1,CYP7A1,ESR1,F3,FAS,FN1,HK2,IFNG,IGF1R,ITGB<br>3,MATK,MMP1,MMP2,MUC1,ODC1,PKD4,PNMT,PTPRE,SERPINA5                                                                                                                                                                               | 3  | 21 |

|           |                            |          |          |                                                   |                                                                                                                         |   |    |
|-----------|----------------------------|----------|----------|---------------------------------------------------|-------------------------------------------------------------------------------------------------------------------------|---|----|
| ELANE     | peptidase                  | 4.63E-09 | 1.45E-02 | ELANE,ERK1/2,NFkB (complex),RELA                  | B2M,CERT1,CYP17A1,CYP7A1,ESR1,FAS,FN1,HBEGF,HK2,HMOX1,IFNG,IGF1R,KYNU,MMP1,MMP2,MSH2,NOTCH1,PPARG,PTPRE,SENP2,STK4,XIAP | 4 | 22 |
| ZNF148    | transcription regulator    | 4.63E-09 | 2.18E-02 | CASP8,ERK1/2,MAPK8,NFkB (complex),P38 MAPK,ZNF148 | B2M,CTCF,CYP17A1,CYP7A1,DGKA,ESR1,F3,FAS,FN1,HBEGF,HK2,IFNG,IGF1R,ITGB3,KYNU,MMP1,MMP2,NOTCH1,PTPRE,RARA,SENP2,XIAP     | 5 | 22 |
| VEGFB     | growth factor              | 4.66E-09 | 8.10E-03 | ERK1/2,FLT1,Jnk,Src (family),VEGFB                | B2M,BTRC,CYP17A1,CYP7A1,ESR1,HBEGF,HK2,IFNG,IGF1R,ITGB3,MMP1,MMP2,MSH2,NOTCH1,PTPRE,RARA,XIAP                           | 4 | 17 |
| HSP90AA1  | enzyme                     | 4.66E-09 | 9.00E-04 | c-Src,EGFR,HSP90AA1,LATS1                         | AR,CYP7A1,ESR1,F3,FN1,HK2,HMOX1,HNRNPA2B1,IFNG,MMP1,MUC1,PTPRE,XIAP,ZEB2                                                | 4 | 14 |
| CD81      | other                      | 4.66E-09 | 2.30E-03 | CD81,ERK,MMP2,RAC1                                | CDK5R1,CSF2RB,ESR1,FAS,HBEGF,IFNG,ITGB3,MMP1,MMP2,MUC1,ODC1,PKD4,PPP2R1A,TJP1                                           | 4 | 14 |
| PELI2     | enzyme                     | 4.80E-09 | 4.50E-03 | ERK,Jnk,PELI2                                     | BTRC,CDK5R1,ESR1,FAS,HBEGF,IFNG,ITGB3,MMP1,MMP2,MSH2,MUC1,ODC1,PKD4,RARA,XIAP                                           | 2 | 15 |
| TGFA      | growth factor              | 4.80E-09 | 2.50E-03 | EGFR,MET,RPS6KB1,Src,TGFA                         | AR,ESR1,F3,FN1,HK2,HMOX1,HNRNPA2B1,IFNG,IGF1R,MMP1,MMP2,MUC1,PTPRE,XIAP,ZEB2                                            | 4 | 15 |
| SND1-BRAF | fusion gene/product        | 4.83E-09 | 8.80E-03 | ERK,ERK1/2,MAP2K1/2,SND1-BRAF                     | B2M,CDK5R1,CYP17A1,CYP7A1,ESR1,FAS,FN1,HK2,IFNG,IGF1R,ITGB3,MMP1,MMP2,MUC1,ODC1,PKD4,PTPRE,RRM1                         | 3 | 18 |
| DBH-AS1   | other                      | 4.83E-09 | 1.04E-02 | DBH-AS1,ERK,Jnk,P38 MAPK                          | BTRC,CDK5R1,DGKA,ESR1,F3,FN1,HBEGF,HMOX1,IFNG,ITGB3,MMP1,MMP2,MSH2,MUC1,ODC1,PKD4,RARA,XIAP                             | 3 | 18 |
| CSNK2B    | kinase                     | 4.88E-09 | 1.55E-02 | CSNK2B,ERK1/2,NFkB (complex),RELA                 | B2M,CERT1,CYP17A1,CYP7A1,ESR1,FAS,FN1,HBEGF,HK2,HMOX1,IFNG,IGF1R,KYNU,MMP1,MMP2,MSH2,NOTCH1,PPARG,PTPRE,SENP2,STK4,XIAP | 3 | 22 |
| PTGER2    | G-protein coupled receptor | 4.88E-09 | 1.43E-02 | AKT1,EGFR,ERK1/2,PTGER2,RELA                      | AR,B2M,CERT1,CTCF,CYP17A1,CYP7A1,ESR1,F3,FAS,FN1,HBEGF,HK2,HMOX1,HNRNPA2B1,IGF1R,MMP1,MMP2,PPARG,PTPRE,STK4,XIAP,ZEB2   | 4 | 22 |
| MAP3K11   | kinase                     | 4.88E-09 | 2.07E-02 | ERK,ERK1/2,Jnk,JUN,MAP3K11,P38 MAPK               | B2M,BTRC,CDK5R1,CYP17A1,CYP7A1,DGKA,ESR1,F3,HK2,HMOX1,IFNG,IGF1R,ITGB3,MMP1,MMP2,MSH2,MUC1,ODC1,PKD4,PTPRE,RARA,XIAP    | 5 | 22 |
| NTRK2     | kinase                     | 4.93E-09 | 1.34E-02 | Akt,ERK,ERK1/2,NTRK2,RHOA                         | B2M,CDK5R1,CYP17A1,CYP7A1,ESR1,F3,FAS,FN1,HK2,IFNG,ITGB3,MMP1,MMP2,MUC1,NOTCH1,ODC1,PDHA1,PTPRE,TJP1                    | 4 | 19 |
| MAP3K19   | kinase                     | 5.41E-09 | 7.20E-03 | ERK1/2,Jnk,MAP2K1/2,MAP3K19                       | B2M,BTRC,CYP17A1,CYP7A1,ESR1,FN1,HBEGF,HK2,IFNG,IGF1R,MMP1,MMP2,MSH2,PTPRE,RARA,RRM1,XIAP                               | 3 | 17 |

|             |                               |                 |                 |                                                  |                                                                                                                                                           |          |           |
|-------------|-------------------------------|-----------------|-----------------|--------------------------------------------------|-----------------------------------------------------------------------------------------------------------------------------------------------------------|----------|-----------|
| NF1         | other                         | 5.61E-09        | 2.10E-02        | ADCY,ERK1/2,GNAS,HIF1A,Jnk,JUN,MMP2,NF1          | B2M,BTRC,CSF2RB,CYP17A1,CYP7A1,ERBB4,ESR1, FN1 ,HBEGF,HK2,IFNG,IGF1R,ITGB3,MMP1,MMP2,MSH2,MUC1,NAE1,NFATC1,PPP2R1A,PTPRE,RARA,TJP1,XIAP                   | 6        | 24        |
| PDGFRB      | kinase                        | 5.64E-09        | 1.19E-02        | Akt,AKT1,ERK1/2,JAK1 ,JAK2,PDGFRB,RAS,SMAD2,TYK2 | B2M,CYP17A1,CYP7A1,ESR1,F3, FN1 ,HBEGF,HK2,HMOX1,IFNG,MMP1,MMP2,MUC1,NOTCH1,PKK4,PTPRE,RAC1,RARA,TJP1,XIAP                                                | 9        | 20        |
| <b>NRP1</b> | <b>transmembrane receptor</b> | <b>5.64E-09</b> | <b>1.41E-02</b> | <b>Akt,EGFR,ERK,KDR,MET,NRP1,SMAD2,SMAD3</b>     | <b>AR,CDK5R1,ESR1,FAS, FN1 ,HBEGF,HK2,HMOX1,HNRNPA2B1,IGF1R,ITGB3,MMP1,MMP2,MUC1,NOTCH1,ODC1,PTPRE,RAC1,TJP1,ZEB2</b>                                     | <b>7</b> | <b>20</b> |
| INHBA       | growth factor                 | 5.78E-09        | 1.01E-02        | Akt,ERK1/2,GSK3B,INHBA,P38MAPK,SMAD2,SMAD3       | B2M,CYP17A1,CYP7A1,DGKA,ERBB4,ESR1,F3,FAS,HBEGF,HK2,HMOX1,IFNG,ITGB3,MSH2,MUC1,NOTCH1,PKK4,PTPRE,RAC1,RARA,TJP1, VAV3, XIAP                               | 7        | 23        |
| ANXA2       | other                         | 5.88E-09        | 2.96E-02        | Akt,ANXA2,ERK1/2,Jnk,P38MAPK, SRC,STAT3          | ANG,B2M,BTRC,CYP17A1,CYP7A1,DGKA,ESR1,FAS,HBEGF,HK2,HMOX1,IFNG,ITGB3,MMP1,MMP2,MSH2,MUC1,NOTCH1,PKK4,PGK1,PTPRE,RARA,TJP1,XIAP                            | 7        | 24        |
| KIT         | transmembrane receptor        | 5.93E-09        | 1.02E-02        | AKT1,ERK,ERK1/2,KIT                              | B2M,CDK5R1,CYP17A1,CYP7A1,ESR1,FAS, FN1 ,HK2,HMOX1,IFNG,IGF1R,ITGB3,MMP1,MMP2,MUC1,ODC1,PKK4,PTPRE                                                        | 3        | 18        |
| IL21        | cytokine                      | 6.05E-09        | 4.35E-02        | ERK1/2,IL21,Mapk,NFkB (complex),RELA,STAT1,STAT3 | B2M,C1R,CERT1,CYP17A1,CYP7A1,ESR1,FAS, FN1 ,HBEGF,HK2,IFNG,IGF1R,KYNU,MMP1,MMP2,MSH2,MUC1,NOTCH1,NR1I3,PGK1,PPARG,PTPRE,SENP2,STK4,TLR4,TRIM21,WARS1,XIAP | 7        | 28        |
| PRR7        | other                         | 6.10E-09        | 6.60E-03        | ERK1/2,Jnk,PRR7,ZAP70                            | B2M,BTRC,CYP17A1,CYP7A1,ESR1, FN1 ,HBEGF,HK2,IFNG,IGF1R,MMP1,MMP2,MSH2,PTPRE,RARA,XIAP                                                                    | 3        | 16        |
| IL6R        | transmembrane receptor        | 6.34E-09        | 1.42E-02        | ERK1/2,IL6R,MMP2,STAT1,STAT3                     | B2M,C1R,CSF2RB,CYP17A1,CYP7A1,ESR1,FAS, FN1 ,HBEGF,HK2,HMOX1,IGF1R,MMP1,MMP2,MUC1,NOTCH1,PGK1,PPP2R1A,PTPRE,TJP1,TRIM21,WARS1                             | 4        | 22        |
| HTRA1       | peptidase                     | 6.60E-09        | 4.90E-03        | Akt,EGFR,HTRA1,Mapk                              | AR,ESR1,HK2,HNRNPA2B1,IFNG,IGF1R,MMP1,MMP2,MUC1,NOTCH1,NR1I3,PKK4,PTPRE,TJP1,XIAP,ZEB2                                                                    | 4        | 16        |
| SAA1        | transporter                   | 6.70E-09        | 2.84E-02        | Akt,ERK1/2,Jnk,NFkB (complex),P38MAPK,SAA1       | B2M,BTRC,CTCF,CYP17A1,CYP7A1,DGKA,ESR1,FAS,HBEGF,HK2,IFNG,ITGB3,KYNU,MMP1,MMP2,MUC1,NOTCH1,PKK4,PPARG,PTPRE,RARA,SENP2,TJP1                               | 6        | 23        |
| PRKCB       | kinase                        | 6.75E-09        | 1.30E-02        | ERK1/2,Jnk,MAPK8,NCF1,PRKCB,RAS                  | B2M,BTRC,CYP17A1,CYP7A1,ESR1,F3, FN1 ,HBEGF,HK2,IFNG,IGF1R,MMP1,MMP2,MSH2,PTPRE,RARA,XIAP                                                                 | 6        | 17        |

|                           |                            |          |          |                                                                                                       |                                                                                                                                                           |    |    |
|---------------------------|----------------------------|----------|----------|-------------------------------------------------------------------------------------------------------|-----------------------------------------------------------------------------------------------------------------------------------------------------------|----|----|
| F2                        | peptidase                  | 6.93E-09 | 1.83E-02 | ERK1/2,F2,Hsp27,JAK2,MAPK1,MAPK8,NFkB (complex),P38<br>MAPK,PRKAA1,PRKCQ,PTK2B,RHOA,SRC (family),VSIR | AR,B2M,CD1A,CTCF,CYP17A1,CYP7A1,DGKA,EPHA3,ESR1,F3,FN1,HBB,HBEGF,HK2,HMOX1,IFNG,ITGB3,KYNU,MAGEA4,MMP1,MSH2,NOTCH1,PDHA1,PTPRE,RARA,SEN2,TJP1,TRIM21,XIAP | 14 | 29 |
| ITGA5                     | transmembrane receptor     | 7.07E-09 | 1.90E-02 | ERK1/2,ITGA5,NFkB (complex),P38<br>MAPK                                                               | B2M,CTCF,CYP17A1,CYP7A1,DGKA,ESR1,F3,FAS,HBEGF,HK2,IFNG,IGF1R,ITGB3,KYNU,MMP1,MMP2,NOTCH1,PTPRE,RARA,SEN2,XIAP                                            | 3  | 21 |
| TDGF1                     | growth factor              | 7.26E-09 | 6.60E-03 | Akt,ERBB4,ERK1/2,GSK3B,TDGF1                                                                          | B2M,CYP17A1,CYP7A1,ESR1,F3,FN1,HBEGF,HK2,MMP1,MMP2,MUC1,NOTCH1,PTPRE,RAC1,TJP1                                                                            | 4  | 17 |
| myosin-light-chain kinase | group                      | 7.26E-09 | 1.29E-02 | ERK1/2,Jnk,MAP2K1,MAP2K1/2,myosin-light-chain kinase                                                  | B2M,BTRC,CYP17A1,CYP7A1,ESR1,F3,FN1,HBEGF,HK2,IFNG,IGF1R,MMP1,MMP2,MSH2,PTPRE,RARA,RRM1,XIAP                                                              | 4  | 18 |
| STK38                     | kinase                     | 7.32E-09 | 2.76E-02 | ERK1/2,MYC,P38<br>MAPK,RELA,STK38,YAP1                                                                | B2M,BCR,CERT1,CTCF,CYP17A1,CYP7A1,DGKA,DTYMK,ESR1,F3,FAP,FAS,HBEGF,HK2,HMOX1,IFNG,IGF1R,ITGB3,MMP1,MMP2,MSH2,ODC1,PPARG,PTPRE,RARA,RRM1,STK4              | 5  | 27 |
| BCL2L1                    | other                      | 7.43E-09 | 3.65E-02 | BAX,BCL2L1,CASP1,CASP8,CASP9,caspase,EIF2AK2,ERK1/2,IRF3,MAPK8,NFkB (complex),P38<br>MAPK             | B2M,CTCF,CYP17A1,CYP7A1,DGKA,ESR1,F3,FAS,FN1,HBEGF,HK2,IFNG,IGF1R,ITGB3,KYNU,MMP1,MMP2,NOTCH1,PTPRE,RARA,SEN2,STK4,XIAP,ZNF292                            | 8  | 24 |
| GHRL                      | growth factor              | 7.80E-09 | 7.00E-03 | Akt,c-Src,ERK1/2,GHRL,MMP2                                                                            | B2M,CSF2RB,CYP17A1,CYP7A1,ESR1,F3,FN1,HBEGF,HK2,HMOX1,MMP1,MMP2,MUC1,NOTCH1,PTPRE,PPP2R1A,PTPRE                                                           | 4  | 17 |
| F2R                       | G-protein coupled receptor | 8.22E-09 | 1.65E-02 | ERK1/2,F2R,LATS1,NFkB (complex),P38<br>MAPK,PI3K<br>(complex),RELA,RHOA,YAP1                          | B2M,CERT1,CTCF,CYP17A1,CYP7A1,DGKA,DTYMK,ESR1,F3,HBEGF,HK2,HMOX1,IGF1R,ITGB3,KYNU,MSH2,MUC1,PDHA1,PPARG,PTPRE,RARA,RRM1,SEN2,STK4,XIAP                    | 8  | 25 |
| TRIB2                     | kinase                     | 8.25E-09 | 4.40E-02 | BAX,CASP8,CASP9,CEBPA,ERK1/2,IRF3,MAPK8,MMP14,MMP2,NFkB (complex),P38<br>MAPK,Src,STAT3,TRIB2         | ALB,B2M,CSF2RB,CTCF,CYP17A1,CYP7A1,DGKA,ESR1,F3,FAS,HBEGF,HK2,HMOX1,IFNG,IGF1R,ITGB3,KYNU,MMP2,NOTCH1,PGK1,PPARG,PPP2R1A,PTPRE,RARA,SEN2,STK4,TJP1,XIAP   | 9  | 28 |
| MCF2L                     | other                      | 8.86E-09 | 1.29E-02 | CDC42,ERK1/2,MCF2L,P38<br>MAPK,RHOA,Tgf beta                                                          | B2M,CYP17A1,CYP7A1,DGKA,ESR1,F3,FAS,HBEGF,HK2,HMOX1,IGF1R,ITGB3,MMP2,MSH2,PDHA1,PTPRE,RARA,XIAP                                                           | 4  | 18 |
| SELE                      | transmembrane receptor     | 9.00E-09 | 8.70E-03 | ERK,Hsp27,P38<br>MAPK,SELE                                                                            | CD1A,CDK5R1,DGKA,ESR1,F3,FN1,HBEGF,HMOX1,IFNG,ITGB3,MMP1,MMP2,MSH2,MUC1,ODC1,PTPRE,RARA                                                                   | 3  | 17 |
| PLCB3                     | enzyme                     | 9.23E-09 | 2.80E-03 | ERK,KRAS,PLCB3                                                                                        | CDK5R1,ESR1,FAS,HBEGF,IFNG,IGF1R,ITGB3,MMP1,MMP2,MUC1,ODC1,PTPRE,RARA                                                                                     | 2  | 14 |

|                   |                         |          |          |                                                                |                                                                                                                               |   |    |
|-------------------|-------------------------|----------|----------|----------------------------------------------------------------|-------------------------------------------------------------------------------------------------------------------------------|---|----|
| PIK3C2A           | kinase                  | 9.78E-09 | 4.47E-02 | ERK1/2,ERN1,FOXO1,NFkB<br>(complex),PIK3C2A,PRKAA,SMAD2,SMAD3  | ANG,AR,B2M,CAMK4,CTCF,CYP17A1,CYP7A1,ESR1,FAS,FN1,HBEGF,HK2,IFNG,IGF1R,KIF11,KYNU,MMP1,MMP2,MSH2,NOTCH1,PTPRE,RAC1,SENP2,XIAP | 7 | 24 |
| SCUBE3            | other                   | 9.78E-09 | 4.47E-02 | ERK1/2,ERN1,FOXO1,NFkB<br>(complex),PRKAA,SCUBE3,SMAD2,SMAD3   | ANG,AR,B2M,CAMK4,CTCF,CYP17A1,CYP7A1,ESR1,FAS,FN1,HBEGF,HK2,IFNG,IGF1R,KIF11,KYNU,MMP1,MMP2,MSH2,NOTCH1,PTPRE,RAC1,SENP2,XIAP | 8 | 24 |
| MIR100HG          | other                   | 9.78E-09 | 4.47E-02 | ERK1/2,ERN1,FOXO1,MIR100HG,NFkB<br>(complex),PRKAA,SMAD2,SMAD3 | ANG,AR,B2M,CAMK4,CTCF,CYP17A1,CYP7A1,ESR1,FAS,FN1,HBEGF,HK2,IFNG,IGF1R,KIF11,KYNU,MMP1,MMP2,MSH2,NOTCH1,PTPRE,RAC1,SENP2,XIAP | 8 | 24 |
| ZAP70             | kinase                  | 1.01E-08 | 1.17E-02 | ERK1/2,P38 MAPK,ZAP70                                          | B2M,CYP17A1,CYP7A1,DGKA,ESR1,F3,FAS,HBEGF,HK2,HMOX1,IFNG,IGF1R,ITGB3,MMP1,MMP2,MSH2,PTPRE,RARA                                | 3 | 18 |
| SULF2             | enzyme                  | 1.01E-08 | 8.20E-03 | Akt,ERK1/2,SMAD2,SMAD3,SULF2                                   | B2M,CYP17A1,CYP7A1,ESR1,F3,FN1,HBEGF,HK2,IFNG,IGF1R,MMP1,MUC1,NOTCH1,PKD4,PTPRE,RAC1,TJP1,XIAP                                | 4 | 18 |
| DEFB4A/DEFB4B     | other                   | 1.04E-08 | 9.30E-03 | DEFB4A/DEFB4B,ERK1/2,P38 MAPK                                  | B2M,CYP17A1,CYP7A1,DGKA,ESR1,F3,FAS,HBEGF,HK2,HMOX1,IGF1R,ITGB3,MMP1,MMP2,MSH2,PTPRE,RARA                                     | 2 | 17 |
| STK3              | kinase                  | 1.05E-08 | 5.60E-03 | AKT1,ERK1/2,Jnk,LATS1,STK3                                     | B2M,BTRC,CYP17A1,CYP7A1,ESR1,FN1,HBEGF,HK2,HMOX1,IFNG,IGF1R,MSH2,MUC1,PTPRE,RARA,XIAP                                         | 4 | 16 |
| HPSE              | enzyme                  | 1.06E-08 | 2.18E-02 | Akt,EGFR,ERK,ERK1/2,HPSE                                       | AR,B2M,CDK5R1,CYP17A1,CYP7A1,ESR1,FAS,FN1,HK2,HNRNPA2B1,ITGB3,MMP1,MMP2,MUC1,NOTCH1,ODC1,PTPRE,TJP1,XIAP,ZEB2                 | 4 | 20 |
| CCAT1             | other                   | 1.06E-08 | 2.41E-02 | Akt,CCAT1,ERK1/2,MAP2K1/2,P38 MAPK                             | B2M,CYP17A1,CYP7A1,DGKA,ESR1,FAS,HBEGF,HK2,HMOX1,ITGB3,MMP1,MMP2,MSH2,MUC1,NOTCH1,PKD4,PTPRE,RARA,RRM1,TJP1                   | 4 | 20 |
| TMSB4             | group                   | 1.08E-08 | 1.98E-02 | ERK,Jnk,P38 MAPK,TMSB4                                         | BTRC,CDK5R1,DGKA,ESR1,F3,FN1,HBEGF,HMOX1,IFNG,ITGB3,MMP1,MMP2,MSH2,MUC1,ODC1,PKD4,RARA,XIAP                                   | 3 | 18 |
| TSC22D1           | transcription regulator | 1.12E-08 | 4.77E-02 | ERK1/2,ERN1,FOXO1,NFkB<br>(complex),PRKAA,SMAD2,SMAD3,TSC22D1  | ANG,AR,B2M,CAMK4,CTCF,CYP17A1,CYP7A1,ESR1,FAS,FN1,HBEGF,HK2,IFNG,IGF1R,KIF11,KYNU,MMP1,MMP2,MSH2,NOTCH1,PTPRE,RAC1,SENP2,XIAP | 7 | 24 |
| ITCH              | enzyme                  | 1.13E-08 | 1.07E-02 | CFLAR,ERK1/2,ITCH,Jnk,NFkB<br>(complex),P38 MAPK               | B2M,BTRC,CTCF,CYP17A1,CYP7A1,DGKA,ESR1,F3,HBEGF,HK2,HMOX1,IGF1R,ITGB3,KYNU,MSH2,NOTCH1,PTPRE,RARA,SENP2,XIAP                  | 5 | 20 |
| DEFB103A/DEFB103B | other                   | 1.14E-08 | 4.80E-03 | DEFB103A/DEFB103B,ERK1/2,P38 MAPK                              | B2M,CYP17A1,CYP7A1,DGKA,ESR1,F3,FAS,FN1,HBEGF,HK2,HMOX1,IGF1R,ITGB3,MSH2,PTPRE,RARA                                           | 2 | 16 |

|                           |                            |          |          |                                                              |                                                                                                                               |   |    |
|---------------------------|----------------------------|----------|----------|--------------------------------------------------------------|-------------------------------------------------------------------------------------------------------------------------------|---|----|
| IL33                      | cytokine                   | 1.14E-08 | 4.35E-02 | ERK,ERK1/2,IL33,Jnk,NFkB<br>(complex),P38 MAPK               | B2M,BTRC,CDK5R1,CTCF,CYP17A1,CYP7A1,DGKA,ESR1,F3,HK2,IFNG,IGF1R,ITGB3,KYNU,MMP1,MMP2,MUC1,NOTCH1,ODC1,PKK4,PTPRE,RARA,SENP2   | 6 | 23 |
| CHCHD2                    | other                      | 1.17E-08 | 4.92E-02 | CHCHD2,ERK1/2,ERN1,FOXO1,NFkB<br>(complex),PRKAA,SMAD2,SMAD3 | ANG,AR,B2M,CAMK4,CTCF,CYP17A1,CYP7A1,ESR1,FAS,FN1,HBEGF,HK2,IFNG,IGF1R,KIF11,KYNU,MMP1,MMP2,MSH2,NOTCH1,PTPRE,RAC1,SENP2,XIAP | 7 | 24 |
| BMP6                      | growth factor              | 1.23E-08 | 5.70E-03 | BMP6,ERK1/2,P38 MAPK                                         | B2M,CYP17A1,CYP7A1,DGKA,ESR1,F3,FAS,FN1,HBEGF,HK2,HMOX1,IGF1R,ITGB3,MSH2,PTPRE,RARA                                           | 2 | 16 |
| PTAFR                     | G-protein coupled receptor | 1.25E-08 | 2.23E-02 | Akt,ERK1/2,P38 MAPK,PTAFR                                    | B2M,CYP17A1,CYP7A1,DGKA,ESR1,FAS,HBEGF,HK2,HMOX1,ITGB3,MMP1,MMP2,MSH2,MUC1,NOTCH1,PKK4,PTPRE,RARA,TJP1                        | 4 | 19 |
| IL32                      | cytokine                   | 1.28E-08 | 3.67E-02 | CEBPA,EP300,ERK1/2,IL32,NFkB<br>(complex),P38 MAPK           | ALB,AR,B2M,CTCF,CYP17A1,CYP7A1,DGKA,ESR1,F3,FAS,HBEGF,HK2,IFNG,IGF1R,ITGB3,KYNU,MMP1,MMP2,NOTCH1,PPARG,PTPRE,RARA,SENP2,XIAP  | 5 | 24 |
| CRH                       | cytokine                   | 1.28E-08 | 9.70E-03 | CRH,ERK1/2,P38 MAPK                                          | B2M,CYP17A1,CYP7A1,DGKA,ESR1,F3,FAS,HBEGF,HK2,HMOX1,IGF1R,ITGB3,MMP1,MMP2,MSH2,PTPRE,RARA                                     | 2 | 17 |
| FLT3                      | kinase                     | 1.29E-08 | 2.05E-02 | ERK1/2,FLT3,JAK2,MAPT,MMP14,MMP2,SRC,STAT1,STAT3             | B2M,C1R,CSF2RB,CYP17A1,CYP7A1,ESR1,FAS,FN1,HBEGF,HK2,HMOX1,IGF1R,MMP2,MUC1,NOTCH1,PGK1,PPP2R1A,PTPRE,RARA,TJP1,TRIM21,WARS1   | 6 | 22 |
| VHL                       | transcription regulator    | 1.32E-08 | 1.42E-02 | ERK1/2,FGFR1,NFkB<br>(complex),SPRY2,VHL                     | B2M,CTCF,CYP17A1,CYP7A1,ESR1,FAS,FN1,HBEGF,HMOX1,IFNG,IGF1R,KYNU,MSH2,NOTCH1,PGK1,PTPRE,SENP2,SFN,XIAP                        | 4 | 19 |
| WNT5A                     | cytokine                   | 1.33E-08 | 1.05E-02 | Akt,Jnk,MTOR,P38 MAPK,WNT5A                                  | AR,BTRC,CHKA,DGKA,F3,FAS,FN1,HMOX1,IGF1R,ITGB3,MMP1,MSH2,MUC1,NOTCH1,PKK4,RARA,SEMA4D,TJP1,TLR4,XIAP                          | 5 | 20 |
| PEA15                     | transporter                | 1.34E-08 | 3.10E-03 | ERK1/2,Jnk,PEA15                                             | B2M,BTRC,CYP17A1,CYP7A1,ESR1,FN1,HBEGF,HK2,IFNG,IGF1R,MSH2,PTPRE,RARA,XIAP                                                    | 2 | 14 |
| CGB3<br>(includes others) | other                      | 1.47E-08 | 3.50E-03 | CGB3 (includes others),ERK1/2,MMP2                           | B2M,CSF2RB,CYP17A1,CYP7A1,ESR1,FN1,HBEGF,HK2,IGF1R,MMP1,MMP2,PPP2R1A,PTPRE,TJP1                                               | 3 | 14 |
| FGF18                     | growth factor              | 1.47E-08 | 1.08E-02 | ERK1/2,FGF18,P38 MAPK                                        | B2M,CYP17A1,CYP7A1,DGKA,ESR1,F3,FAS,HBEGF,HK2,HMOX1,IGF1R,ITGB3,MMP1,MMP2,MSH2,PTPRE,RARA                                     | 2 | 17 |
| FGFR4                     | kinase                     | 1.47E-08 | 1.13E-02 | Akt,ERK1/2,FGFR4,MTOR,SRC                                    | AR,B2M,CHKA,CYP17A1,CYP7A1,ESR1,F3,FN1,HBEGF,HK2,IFNG,MMP1,MMP2,NOTCH1,PKK4,PTPRE,TJP1                                        | 4 | 17 |



|         |               |          |          |                                                        |                                                                                                                    |   |    |
|---------|---------------|----------|----------|--------------------------------------------------------|--------------------------------------------------------------------------------------------------------------------|---|----|
| RAS     | group         | 1.49E-08 | 1.84E-02 | Akt,ERK,ERK1/2,Mapk,NFkB (complex),PRKAA,RAS           | AR,B2M,CDK5R1,CTCF,CYP17A1,CYP7A1,ESR1,F3,FN1,HK2,HMOX1,IFNG,ITGB3,KYNU,MSH2,MUC1,NR1I3,ODC1,PTPRE,SENP2,TJP1,XIAP | 7 | 22 |
| IL17F   | cytokine      | 1.49E-08 | 2.02E-02 | ERK,ERK1/2,IL17F,RELA                                  | B2M,CDK5R1,CERT1,CTCF,CYP17A1,CYP7A1,ESR1,FN1,HK2,IFNG,IGF1R,ITGB3,MMP1,MMP2,MUC1,ODC1,PKK4,PPARG,PTPRE,STK4       | 3 | 20 |
| mir-155 | microRNA      | 1.57E-08 | 1.92E-02 | Akt,ERK,Gsk3,mir-155,RELA                              | CDK5R1,CERT1,CTCF,ESR1,F3,HBEGF,HK2,IFNG,IGF1R,ITGB3,MMP1,MMP2,MUC1,NOTCH1,ODC1,PPARG,STK4,TJP1,WEE1,XIAP          | 5 | 20 |
| DNM2    | enzyme        | 1.58E-08 | 1.06E-02 | Akt,DNM2,EGFR,ERK1/2,MMP2                              | AR,B2M,CSF2RB,CYP17A1,CYP7A1,F3,FN1,HBEGF,HNRNPA2B1,IFNG,MMP2,MUC1,NOTCH1,PKK4,PPP2R1A,TJP1,XIAP,ZEB2              | 4 | 18 |
| SH2D1A  | other         | 1.61E-08 | 5.20E-03 | DGKA,ERK1/2,LCK,SH2D1A                                 | B2M,CYP17A1,CYP7A1,ESR1,FN1,HBEGF,HK2,IFNG,IGF1R,MMP1,MMP2,PPARG,PTPRE,WEE1                                        | 4 | 14 |
| PDGFB   | growth factor | 1.73E-08 | 6.80E-03 | Akt,ERK,PDGFB,PDGFRB                                   | CDK5R1,ESR1,F3,FAS,FN1,HBEGF,IFNG,IGF1R,ITGB3,MMP1,MMP2,MUC1,NOTCH1,ODC1,TJP1                                      | 3 | 15 |
| TNFSF15 | cytokine      | 1.74E-08 | 3.54E-02 | ERK1/2,Jnk,NFkB (complex),P38 MAPK,TNFSF15             | B2M,BTRC,CTCF,CYP17A1,CYP7A1,DGKA,ESR1,F3,FAS,HBEGF,HK2,IFNG,IGF1R,ITGB3,KYNU,MMP1,MMP2,NOTCH1,PTPRE,RARA,SENP2    | 4 | 21 |
| CASP8   | peptidase     | 1.74E-08 | 3.09E-02 | CASP8,ERK1/2,MAPK8,NFkB (complex),P38 MAPK             | B2M,CTCF,CYP17A1,CYP7A1,DGKA,ESR1,F3,FAS,HBEGF,HK2,IFNG,IGF1R,ITGB3,KYNU,MMP1,MMP2,NOTCH1,PTPRE,RARA,SENP2,XIAP    | 4 | 21 |
| BTC     | growth factor | 1.78E-08 | 8.70E-03 | Akt,BTC,ERBB4,ERK1/2                                   | B2M,CYP17A1,CYP7A1,ESR1,F3,FN1,HBEGF,HK2,MMP1,MMP2,MUC1,NOTCH1,PKK4,PGK1,PTPRE,TJP1                                | 3 | 16 |
| NPY     | other         | 1.78E-08 | 1.21E-02 | ERK,NPY,P38 MAPK                                       | CDK5R1,DGKA,ESR1,F3,FN1,HBEGF,HMOX1,IFNG,ITGB3,MMP1,MMP2,MSH2,MUC1,ODC1,PKK4,RARA                                  | 2 | 16 |
| LAMA3   | other         | 1.78E-08 | 1.21E-02 | ERK,LAMA3,P38 MAPK                                     | CDK5R1,DGKA,ESR1,F3,FN1,HBEGF,HMOX1,IFNG,ITGB3,MMP1,MMP2,MSH2,MUC1,ODC1,PKK4,RARA                                  | 3 | 16 |
| TRAF7   | enzyme        | 1.83E-08 | 1.82E-02 | CHUK,ERK1/2,Jnk,MAP2K1/2,NFkB (complex),P38 MAPK,TRAF7 | B2M,BTRC,CTCF,CYP17A1,CYP7A1,ESR1,F3,FAS,FN1,HBEGF,HK2,IFNG,IGF1R,ITGB3,KYNU,NOTCH1,PTPRE,RAC1,RARA,RRM1,SENP2     | 7 | 21 |
| IL36A   | cytokine      | 1.83E-08 | 3.66E-02 | ERK1/2,IL36A,Jnk,NFkB (complex),P38 MAPK               | B2M,BTRC,CTCF,CYP17A1,CYP7A1,DGKA,ESR1,F3,FAS,HBEGF,HK2,IFNG,IGF1R,ITGB3,KYNU,MMP1,MMP2,NOTCH1,PTPRE,RARA,SENP2    | 4 | 21 |
| DGKD    | kinase        | 1.87E-08 | 6.20E-03 | Akt,DGKD,EGFR                                          | AR,ESR1,HK2,HNRNPA2B1,IFNG,IGF1R,MMP1,MMP2,MUC1,NOTCH1,PKK4,PTPRE,TJP1,XIAP,ZEB2                                   | 2 | 15 |
| MAP4K1  | kinase        | 1.88E-08 | 6.50E-03 | ERK,Jnk,LCP2,MAP4K1,Mapk,NFkB (complex),PIK3R1,PLCG1   | AR,BTRC,CDK5R1,CTCF,ESR1,FAS,HBEGF,HMOX1,ITGB3,KYNU,MSH2,MUC1,NOTCH1,NR1I3,ODC1,PKK4,RARA,SENP2,XIAP               | 5 | 19 |
| PGK1    | kinase        | 1.92E-08 | 1.08E-02 | Akt,ERK,MTOR,PGK1                                      | AR,CDK5R1,CHKA,ESR1,F3,FAS,HBEGF,IFNG,IGF1R,ITGB3,MMP1,MMP2,MUC1,NOTCH1,ODC1,TJP1                                  | 3 | 16 |

|        |                         |          |          |                                                                                              |                                                                                                                                                                                                           |    |    |
|--------|-------------------------|----------|----------|----------------------------------------------------------------------------------------------|-----------------------------------------------------------------------------------------------------------------------------------------------------------------------------------------------------------|----|----|
| PI3K 纬 | group                   | 1.92E-08 | 1.11E-02 | Akt,ERK1/2,PI3K 纬                                                                            | B2M,CYP17A1,CYP7A1,ESR1,F3,FN1,HBEGF,HK2,IFNG,MMP1,MMP2,MUC1,NOTCH1,PKK4,PTPRE,TJP1                                                                                                                       | 3  | 16 |
| KLF5   | transcription regulator | 1.92E-08 | 5.80E-03 | DUSP1,ERK,KLF5,NOTCH1                                                                        | CDK5R1,CYP17A1,ESR1,FAS,HBEGF,HMOX1,IFNG,IGF1R,ITGB3,MMP2,MUC1,NOTCH1,ODC1,PKK4,PPARG,RARA                                                                                                                | 4  | 16 |
| PIK3CG | kinase                  | 2.03E-08 | 2.06E-02 | Akt,ERK,ERK1/2,PIK3CG                                                                        | B2M,CDK5R1,CYP17A1,CYP7A1,ESR1,F3,FAS,FN1,HK2,IFNG,ITGB3,MMP1,MMP2,MUC1,NOTCH1,ODC1,PTPRE,TJP1                                                                                                            | 4  | 18 |
| EGR1   | transcription regulator | 2.10E-08 | 3.80E-03 | EGR1,ERK                                                                                     | CDK5R1,ESR1,F3,FAS,HBEGF,IFNG,ITGB3,MMP1,MMP2,MUC1,ODC1,PKK4,PPARG                                                                                                                                        | 2  | 13 |
| Hsp90  | group                   | 2.12E-08 | 4.78E-02 | ERBB2,ERK,HSF1,Hsp90,Jnk,P38 MAPK,STAT1                                                      | AR,BMP1,BTRC,C1R,CDK5R1,DGKA,ERBB4,ESR1,GART,GRK6,HBEGF,HMOX1,HSP90AB1,IFNG,ITGB3,MMP1,MMP2,MSH2,MUC1,ODC1,PKK4,PGK1,PPARG,PTPRF,RARA,RRM1,SMTN,TRIM21,TTR,WARS1,XIAP                                     | 7  | 31 |
| RAP1B  | enzyme                  | 2.20E-08 | 1.42E-02 | ERK1/2,P38 MAPK,RAC1,RAP1B                                                                   | B2M,CYP17A1,CYP7A1,DGKA,ESR1,F3,FAS,HBEGF,HK2,HMOX1,IGF1R,ITGB3,MMP1,MMP2,MSH2,PTPRE,RARA                                                                                                                 | 3  | 17 |
| KLB    | enzyme                  | 2.24E-08 | 3.59E-02 | Akt,CEBPA,ERK,ERK1/2,FOXO1,FRS2,SK3B,Jnk,KLB,MAPK8,MED1,MMP2,MYC,P38 MAPK,SREBF2,TFEB,YBX1   | ALB,B2M,BCR,BTRC,CAMK4,CDK5R1,CSF2RB,CYP17A1,CYP7A1,DGKA,DTYMK,EPAH3,ESR1,F3,FABP7,FAP,FN1,GTF2I,HBB,HBEGF,HK2,IGF1R,KIF11,MMP1,MUC1,NOTCH1,PKK4,PPP2R1A,PSAP,PTPRE,RAC1,RARA,TJP1,VPS26A                 | 15 | 34 |
| NRAS   | enzyme                  | 2.29E-08 | 2.38E-02 | Akt,ERK,ERK1/2,NRAS                                                                          | B2M,CDK5R1,CYP17A1,CYP7A1,ESR1,F3,FAS,FN1,HK2,IFNG,ITGB3,MMP1,MMP2,MUC1,NOTCH1,ODC1,PTPRE,TJP1                                                                                                            | 3  | 18 |
| TIMP3  | other                   | 2.30E-08 | 4.14E-02 | Akt,EGFR,ERK1/2,MET,NFkB (complex),RAF1,TIMP3                                                | AR,B2M,CTCF,CYP17A1,CYP7A1,ESR1,FAS,FN1,HBEGF,HK2,HMOX1,HNRNPA2B1,KYNU,MMP1,MSH2,MUC1,NOTCH1,PKK4,PTPRE,SENP2,TJP1,ZEB2                                                                                   | 7  | 22 |
| FLCN   | other                   | 2.30E-08 | 4.53E-02 | Akt,ERK1/2,FLCN,FOXO1,Gsk3,HSF1,MTOR,MTORC1,NR3C1,PRKAA,RHOA,RPS6KB1,SREBF1,SREBF2,TP53,YAP1 | AR,B2M,CAMK4,CHKA,CYP17A1,CYP7A1,DGKA,DTYMK,ESR1,F3,FABP3,FABP7,FAS,GART,GTF2I,HBEGF,HSP90AB1,IFNG,KIF11,MMP1,MMP2,MUC1,NDC80,NFATC1,NR1I3,PANK1,PDHA1,PKK4,PGK1,PPARG,PTPRE,RRM1,SFN,TJP1,TTR,XIAP,YWHAH | 14 | 37 |
| AGER   | transmembrane receptor  | 2.35E-08 | 2.94E-02 | AGER,EGFR,ERK,ERK1/2,Mapk,P38 MAPK                                                           | AR,B2M,CDK5R1,CYP17A1,CYP7A1,DGKA,F3,HMOX1,HNRNPA2B1,IFNG,IGF1R,ITGB3,MMP2,MSH2,MUC1,NR1I3,ODC1,PKK4,RARA,XIAP,ZEB2                                                                                       | 6  | 21 |
| TRAF4  | other                   | 2.37E-08 | 6.20E-03 | Akt,EGFR,TRAF4                                                                               | AR,ESR1,HK2,HNRNPA2B1,IFNG,IGF1R,MMP1,MMP2,MUC1,NOTCH1,PKK4,PTPRE,TJP1,XIAP,ZEB2                                                                                                                          | 2  | 15 |
| LIMS1  | other                   | 2.38E-08 | 1.17E-02 | AKT1,ERK1/2,LIMS1,MTOR                                                                       | AR,B2M,CHKA,CYP17A1,CYP7A1,ESR1,FN1,HBEGF,HK2,HMOX1,IFNG,IGF1R,MMP1,MMP2,MUC1,PTPRE                                                                                                                       | 3  | 16 |

|        |                            |          |          |                                                                                            |                                                                                                                                                                                               |    |    |
|--------|----------------------------|----------|----------|--------------------------------------------------------------------------------------------|-----------------------------------------------------------------------------------------------------------------------------------------------------------------------------------------------|----|----|
| NOD1   | other                      | 2.38E-08 | 8.10E-03 | ERK1/2,Jnk,NOD1,P38 MAPK                                                                   | B2M,BTRC,CYP17A1,CYP7A1,DGKA,ESR1,F3,FAS,HBEGF,HK2,HMOX1,IFNG,IGF1R,ITGB3,PTPRE,XIAP                                                                                                          | 3  | 16 |
| S100B  | other                      | 2.43E-08 | 2.02E-02 | Akt,GSK3B,NFkB (complex),RHOA,S100B                                                        | CTCF,F3,FAS,HMOX1,IFNG,IGF1R,KYNU,MMP1,MMP2,MSH2,MUC1,NOTCH1,PDHA1,PKD4,RAC1,SEN2,TJP1,XIAP                                                                                                   | 4  | 18 |
| ADGRE5 | G-protein coupled receptor | 2.45E-08 | 3.80E-03 | ADGRE5,ERK,Ras homolog                                                                     | CDK5R1,ESR1,FAS,HBEGF,IFNG,ITGB3,MMP1,MMP2,MUC1,ODC1,PKD4,TJP1                                                                                                                                | 2  | 12 |
| PEBP1  | other                      | 2.50E-08 | 1.00E-02 | ADCY,ERK,ERK1/2,PEBP1,RELA                                                                 | B2M,CDK5R1,CERT1,CTCF,CYP17A1,CYP7A1,FAS,FN1,HBEGF,HK2,IGF1R,ITGB3,MUC1,NFATC1,ODC1,PKD4,PPARG,PTPRE,STK4                                                                                     | 4  | 19 |
| C3     | peptidase                  | 2.50E-08 | 2.42E-02 | Akt,C3,C5AR2,ERK1/2,IRF3,MAPK8,PARP1                                                       | B2M,CYP17A1,CYP7A1,ESR1,F3,FAS,FN1,HBEGF,HK2,IFNG,MMP1,MMP2,MUC1,NOTCH1,PKD4,PTPRE,RARA,STK4,TJP1                                                                                             | 6  | 19 |
| P2RY2  | G-protein coupled receptor | 2.50E-08 | 4.91E-02 | Akt,CEBPA,ERK1/2,FOXO1,GSK3B,Jnk,MAPK8,MED1,MMP2,MYC,P2RY2,Rac,RAC1,RHOA,SREBF2,STAT1,YBX1 | ALB,B2M,BCR,BTRC,C1R,CAMK4,CSF2RB,CYP17A1,CYP7A1,DTYMK,EPHA3,ESR1,F3,FABP7,FAP,FN1,GTF21,HBB,HBEGF,HK2,IGF1R,KIF11,MMP1,MUC1,NOTCH1,ODC1,PDHA1,PKD4,PPP2R1A,PTPRE,RAC1,RARA,TJP1,TRIM21,WARS1 | 15 | 35 |
| TSLP   | cytokine                   | 2.65E-08 | 4.84E-02 | ERK1/2,Jnk,P38 MAPK,STAT3,STAT5a/b,TSLP                                                    | B2M,BTRC,CYP17A1,CYP7A1,DGKA,ESR1,F3,FAS,HBEGF,HK2,HMOX1,IFNG,IGF1R,ITGB3,MMP1,MMP2,MSH2,NOTCH1,PGK1,PTPRE,RARA,XIAP                                                                          | 5  | 22 |
| Pdgfr  | group                      | 2.74E-08 | 1.27E-02 | Akt,ERK,GSK3B,Pdgfr,PDGFRB                                                                 | CDK5R1,ESR1,F3,FAS,FN1,HBEGF,IFNG,IGF1R,ITGB3,MMP1,MMP2,MUC1,NOTCH1,ODC1,RAC1,TJP1                                                                                                            | 4  | 16 |
| NMUR2  | G-protein coupled receptor | 2.74E-08 | 3.20E-03 | ADCY,ERK,NMUR2                                                                             | CDK5R1,ESR1,FAS,HBEGF,IFNG,ITGB3,MMP1,MMP2,MUC1,NFATC1,ODC1,PKD4                                                                                                                              | 2  | 12 |
| IL10   | cytokine                   | 2.92E-08 | 2.66E-02 | ERK1/2,IL10,NFkB (complex),STAT1,STAT3,STAT5a/b                                            | B2M,C1R,CD1A,CTCF,CYP17A1,CYP7A1,ESR1,FN1,HBEGF,HK2,HMOX1,IFNG,IGF1R,KYNU,MSH2,MUC1,PGK1,PTPRE,RARA,SEN2,TLR4,TRIM21,WARS1,XIAP                                                               | 6  | 24 |
| KLB    | enzyme                     | 2.94E-08 | 1.04E-02 | Akt,ERK1/2,GSK3B,KLB                                                                       | B2M,CYP17A1,CYP7A1,ESR1,F3,FN1,HBEGF,HK2,IGF1R,MMP1,MUC1,NOTCH1,PKD4,PTPRE,RAC1,TJP1                                                                                                          | 3  | 16 |
| RASSF1 | other                      | 2.94E-08 | 1.94E-02 | ERK1/2,Jnk,RAC1,RASSF1                                                                     | B2M,BTRC,CYP17A1,CYP7A1,ESR1,FN1,HBEGF,HK2,IFNG,IGF1R,MMP1,MMP2,MSH2,PTPRE,RARA,XIAP                                                                                                          | 4  | 16 |
| MADD   | other                      | 2.96E-08 | 8.30E-03 | ERK,MADD,MAP2K1/2,RAS                                                                      | CDK5R1,CYP7A1,ESR1,FAS,HBEGF,HK2,IFNG,ITGB3,MMP1,MMP2,MUC1,ODC1,PKD4,RRM1                                                                                                                     | 3  | 14 |

|               |                                  |          |          |                                                        |                                                                                                              |   |    |
|---------------|----------------------------------|----------|----------|--------------------------------------------------------|--------------------------------------------------------------------------------------------------------------|---|----|
| NEU3          | enzyme                           | 2.99E-08 | 9.10E-03 | Akt,EGFR,NEU3,Ras homolog                              | AR,ESR1,HK2,HNRNPA2B1,IFNG,IGF1R,MMP1,MMP2,MUC1,NOTCH1,PD<br>K4,PTPRE,TJP1,XIAP,ZEB2                         | 4 | 15 |
| NMUR1         | G-protein<br>coupled<br>receptor | 3.05E-08 | 3.20E-03 | ADCY,ERK,NMUR1                                         | CDK5R1,ESR1,FAS,HBEGF,IFNG,ITGB3,MMP1,MMP2,MUC1,NFATC1,OD<br>C1,PKK4                                         | 2 | 12 |
| AKT3          | kinase                           | 3.05E-08 | 3.60E-03 | AKT3,ERK                                               | CDK5R1,ESR1,FAS,HBEGF,IFNG,ITGB3,MMP1,MMP2,MUC1,ODC1,PKK4,<br>RAC1                                           | 2 | 12 |
| Beta Arrestin | group                            | 3.09E-08 | 5.80E-03 | Beta Arrestin,ERK,SMAD2                                | CDK5R1,ESR1,FAS,FN1,HBEGF,IFNG,ITGB3,MMP1,MUC1,ODC1,PKK4,R<br>AC1,XIAP                                       | 2 | 13 |
| mir-122       | microRNA                         | 3.13E-08 | 1.00E-04 | mir-122                                                | CTCF,CYP7A1,G6PD,GALNT10,IGF1R,MAP3K3,MARK1,SEMA4D,VAV3,<br>WARS1,YARS1                                      | 1 | 11 |
| P2RY2         | G-protein<br>coupled<br>receptor | 3.15E-08 | 1.34E-02 | Akt,ERK1/2,P2RY2,RAC1,RHOA                             | B2M,CYP17A1,CYP7A1,ESR1,F3,FN1,HBEGF,HK2,IGF1R,MMP1,MUC1,NO<br>TCH1,PDHA1,PKK4,PTPRE,TJP1                    | 4 | 16 |
| mir-9         | microRNA                         | 3.23E-08 | 1.04E-02 | Akt,ERK,mir-9,NTRK3                                    | AR,CDK5R1,ESR1,F3,FAS,HBEGF,IFNG,IGF1R,ITGB3,MMP1,MMP2,MUC1<br>,NOTCH1,ODC1,TJP1                             | 3 | 15 |
| GRN           | growth factor                    | 3.38E-08 | 1.39E-02 | Akt,ERK1/2,GRN,Mapk                                    | B2M,CYP17A1,CYP7A1,ESR1,F3,FN1,HBEGF,HK2,MMP1,MMP2,MUC1,NO<br>TCH1,NR1I3,PKK4,PTPRE,TJP1                     | 3 | 16 |
| DAB2IP        | other                            | 3.48E-08 | 1.42E-02 | Akt,c-<br>Src,CTNNB1,DAB2IP,ERK,Jnk,MAP3K5,<br>RPS6KB1 | BTRC,CDK5R1,CYP7A1,ESR1,F3,FAS,FN1,HBEGF,HMOX1,IGF1R,ITGB3,<br>MSH2,MUC1,NOTCH1,ODC1,RARA,TJP1,XIAP          | 7 | 18 |
| ITGA2         | transmembra<br>ne receptor       | 3.48E-08 | 1.32E-02 | Akt,ERK,ITGA2,RHOA                                     | CDK5R1,ESR1,F3,FAS,HBEGF,IFNG,IGF1R,ITGB3,MMP1,MMP2,MUC1,NO<br>TCH1,ODC1,PDHA1,TJP1                          | 3 | 15 |
| CDC37         | other                            | 3.49E-08 | 3.52E-02 | Akt,CDC37,ERK1/2,GSK3B,MAP2K1/2,R<br>AF1,RB1           | B2M,CYP17A1,CYP7A1,ESR1,F3,FAS,FN1,HBEGF,HK2,MMP1,MMP2,MUC<br>1,NOTCH1,PKK4,PTPRE,RAC1,RRM1,TJP1,ZEB2        | 6 | 19 |
| SDCBP         | enzyme                           | 3.49E-08 | 3.84E-02 | c-Src,ERK1/2,P38<br>MAPK,SDCBP,SMAD2,SMAD3             | B2M,CYP17A1,CYP7A1,DGKA,ESR1,F3,FAS,HBEGF,HK2,HMOX1,IFNG,IG<br>F1R,ITGB3,MMP1,MMP2,MSH2,PTPRE,RAC1,RARA,XIAP | 6 | 20 |
| FGF1          | growth factor                    | 3.67E-08 | 2.63E-02 | Akt,ERK1/2,FGF1,FGFR1,GSK3B,Mek,RA<br>F1,RAS,SRC       | B2M,CDK5R1,CYP17A1,CYP7A1,ESR1,F3,FAS,FN1,HBEGF,HK2,IFNG,MM<br>P1,MMP2,MUC1,NOTCH1,PKK4,PTPRE,RAC1,SFN,TJP1  | 8 | 20 |
| PTPRS         | phosphatase                      | 3.68E-08 | 1.72E-02 | EGFR,NFkB (complex),PTPRS                              | AR,CTCF,ESR1,F3,FAS,HK2,HMOX1,HNRNPA2B1,IFNG,KYNU,MMP2,MS<br>H2,NOTCH1,PTPRE,SENP2,XIAP,ZEB2                 | 2 | 17 |

|                                               |                            |          |          |                                                                   |                                                                                                                                           |   |    |
|-----------------------------------------------|----------------------------|----------|----------|-------------------------------------------------------------------|-------------------------------------------------------------------------------------------------------------------------------------------|---|----|
| mir-24                                        | microRNA                   | 3.73E-08 | 5.60E-03 | ERK1/2, mir-24                                                    | B2M, CYP17A1, CYP7A1, ESR1, FN1, HBEGF, HK2, IFNG, IGF1R, MMP1, MMP2, PSAP, PTPRE                                                         | 2 | 13 |
| MGAT1                                         | enzyme                     | 3.73E-08 | 4.80E-03 | EGFR, MGAT1, SMAD2                                                | AR, ESR1, F3, FN1, HK2, HNRNPA2B1, IFNG, ITGB3, MMP1, MMP2, PTPRE, RAC1, ZEB2                                                             | 3 | 13 |
| LTB4R                                         | G-protein coupled receptor | 3.78E-08 | 3.40E-03 | ADCY, ERK, LTB4R                                                  | CDK5R1, ESR1, FAS, HBEGF, IFNG, ITGB3, MMP1, MMP2, MUC1, NFATC1, ODC1, PDK4                                                               | 2 | 12 |
| miR-126a-5p (and other miRNAs w/seed AUUAUUA) | mature microRNA            | 3.88E-08 | 1.52E-02 | Akt, ERK1/2, HBEGF, miR-126a-5p (and other miRNAs w/seed AUUAUUA) | AR, B2M, CYP17A1, CYP7A1, ESR1, F3, FN1, HBEGF, HK2, MMP1, MMP2, MUC1, NOTCH1, PDK4, PTPRE, TJP1                                          | 3 | 16 |
| ENAH                                          | other                      | 3.88E-08 | 1.51E-02 | Akt, ENAH, ERK1/2, Mapk                                           | B2M, CYP17A1, CYP7A1, ESR1, F3, FN1, HBEGF, HK2, MMP1, MMP2, MUC1, NOTCH1, NR1H3, PDK4, PTPRE, TJP1                                       | 3 | 16 |
| G protein beta gamma                          | complex                    | 3.92E-08 | 2.24E-02 | Akt, ERK1/2, G protein beta gamma, PI3K (family)                  | B2M, CYP17A1, CYP7A1, ESR1, F3, FN1, HBEGF, HK2, HMOX1, IGF1R, MMP1, MUC1, NOTCH1, PDK4, PTPRE, TJP1, XIAP                                | 3 | 17 |
| mir-126                                       | microRNA                   | 4.15E-08 | 1.56E-02 | Akt, ERK1/2, HBEGF, mir-126                                       | AR, B2M, CYP17A1, CYP7A1, ESR1, F3, FN1, HBEGF, HK2, MMP1, MMP2, MUC1, NOTCH1, PDK4, PTPRE, TJP1                                          | 3 | 16 |
| Cdk                                           | group                      | 4.15E-08 | 1.64E-02 | Cdk, DAB2, ERK1/2, Jnk                                            | B2M, BTRC, CYP17A1, CYP7A1, ESR1, HASPIN, HBEGF, HK2, IFNG, IGF1R, MMP1, MMP2, MSH2, PTPRE, RARA, XIAP                                    | 3 | 16 |
| DRD2                                          | G-protein coupled receptor | 4.28E-08 | 1.73E-02 | ADCY, Akt, DRD2, ERK, MAPK1                                       | AR, CDK5R1, ESR1, F3, FAS, FN1, HBB, HBEGF, IFNG, IGF1R, ITGB3, MMP1, MMP2, MUC1, NFATC1, NOTCH1, ODC1, TJP1, TRIM21, XIAP                | 4 | 20 |
| RNF41                                         | enzyme                     | 4.36E-08 | 1.08E-02 | Akt, ERBB3, ERK, RNF41                                            | CDK5R1, ESR1, F3, FAS, FN1, HBEGF, IFNG, IGF1R, ITGB3, MMP1, MMP2, MUC1, NOTCH1, ODC1, TJP1                                               | 3 | 15 |
| CSNK2A1                                       | kinase                     | 4.40E-08 | 2.36E-02 | CSNK2A1, ERK1/2, N-cor, NFkB (complex), P38 MAPK, RELA            | B2M, CERT1, CYP7A1, DGKA, ESR1, F3, FN1, HBEGF, HK2, HMOX1, IFNG, IGF1R, ITGB3, KYNU, MSH2, NOTCH1, PPARG, PTPRE, RARA, SENP2, STK4, XIAP | 5 | 22 |
| IL1                                           | group                      | 4.44E-08 | 4.84E-02 | ERK1/2, IL1, Jnk, NFkB (complex), P38 MAPK                        | B2M, BTRC, CTCF, CYP17A1, CYP7A1, DGKA, ESR1, F3, FAS, HBEGF, HK2, IFNG, IGF1R, ITGB3, KYNU, MMP1, MMP2, NOTCH1, PTPRE, RARA, SENP2       | 5 | 21 |
| PTH                                           | other                      | 4.48E-08 | 7.40E-03 | ERK, PTH, SMAD2                                                   | CDK5R1, ESR1, FAS, FN1, HBEGF, IFNG, ITGB3, MMP1, MUC1, ODC1, PDK4, RAC1, XIAP                                                            | 2 | 13 |

|           |                            |          |          |                                             |                                                                                                                     |   |    |
|-----------|----------------------------|----------|----------|---------------------------------------------|---------------------------------------------------------------------------------------------------------------------|---|----|
| BDKRB1    | G-protein coupled receptor | 4.66E-08 | 5.90E-03 | BDKRB1,ERK,NOS2                             | CDK5R1,ESR1,FAS,HBEGF,IFNG,ITGB3,MMP1,MMP2,MUC1,ODC1,PDK4,TLR4                                                      | 2 | 12 |
| ACKR2     | G-protein coupled receptor | 4.66E-08 | 2.73E-02 | ACKR2,Akt,ERK1/2,FOXO1,GSK3B                | B2M,CAMK4,CYP17A1,CYP7A1,ESR1,F3,FN1,HBEGF,HK2,KIF11,MMP1,MMP2,MUC1,NOTCH1,PDK4,PTPRE,RAC1,TJP1                     | 4 | 18 |
| CCL25     | cytokine                   | 4.66E-08 | 2.73E-02 | Akt,CCL25,ERK1/2,FOXO1,GSK3B                | B2M,CAMK4,CYP17A1,CYP7A1,ESR1,F3,FN1,HBEGF,HK2,KIF11,MMP1,MMP2,MUC1,NOTCH1,PDK4,PTPRE,RAC1,TJP1                     | 4 | 18 |
| LINC00963 | other                      | 4.76E-08 | 1.71E-02 | Akt,ERK,LINC00963,MTOR                      | AR,CDK5R1,CHKA,ESR1,F3,FAS,HBEGF,IFNG,IGF1R,ITGB3,MMP1,MMP2,MUC1,NOTCH1,ODC1,TJP1                                   | 3 | 16 |
| S100A7    | other                      | 4.83E-08 | 4.44E-02 | Akt,ERK,NFkB (complex),S100A7               | CDK5R1,CTCF,ESR1,F3,HBEGF,HMOX1,IFNG,IGF1R,ITGB3,KYNU,MMP1,MMP2,MSH2,MUC1,NOTCH1,ODC1,SENP2,TJP1,XIAP               | 3 | 19 |
| GAS5      | other                      | 4.83E-08 | 2.21E-02 | Akt,AKT1,GAS5,GSK3B,MTOR,PI3K (family),RELA | AR,CERT1,CHKA,CTCF,ESR1,F3,FAS,HMOX1,IGF1R,MMP1,MMP2,MUC1,NOTCH1,PDK4,PPARG,RAC1,STK4,TJP1,XIAP                     | 6 | 19 |
| PLC       | group                      | 4.89E-08 | 4.99E-02 | DGKA,ERK,NFkB (complex),NFkB1,PLC,RELA      | CDK5R1,CERT1,ESR1,FN1,HBEGF,HMOX1,IFNG,ITGB3,KYNU,MMP1,MMP2,MSH2,MUC1,NOTCH1,ODC1,PDK4,PPARG,SENP2,STK4,WEE1,XIAP   | 5 | 21 |
| IL27      | cytokine                   | 4.89E-08 | 3.16E-02 | ERK1/2,IL27,STAT1,STAT3                     | B2M,C1R,CYP17A1,CYP7A1,ESR1,FAS,FN1,HBEGF,HK2,HMOX1,IFNG,IGF1R,MMP1,MMP2,MUC1,NFATC1,NOTCH1,PGK1,PTPRE,TRIM21,WARS1 | 4 | 21 |
| GIT1      | kinase                     | 5.03E-08 | 2.19E-02 | Akt,AKT1,AKT2,ERK1/2,GIT1,MMP2              | B2M,CSF2RB,CYP17A1,CYP7A1,F3,FN1,HBEGF,HK2,HMOX1,MMP1,MMP2,MUC1,NOTCH1,PDK4,PPP2R1A,PTPRE,RAC1                      | 6 | 17 |
| GPR183    | G-protein coupled receptor | 5.05E-08 | 1.10E-02 | ERK,ERK1/2,GPR183                           | B2M,CDK5R1,CYP17A1,CYP7A1,FAS,FN1,HBEGF,HK2,IFNG,IGF1R,ITGB3,MUC1,ODC1,PDK4,PTPRE                                   | 2 | 15 |
| DAB2      | other                      | 5.05E-08 | 1.47E-02 | DAB2,ERK1/2,Jnk                             | B2M,BTRC,CYP17A1,CYP7A1,ESR1,HBEGF,HK2,IFNG,IGF1R,MMP1,MMP2,MSH2,PTPRE,RARA,XIAP                                    | 2 | 15 |
| TMEM175   | ion channel                | 5.05E-08 | 7.10E-03 | CTSB,CTSD,ERK,GBA,P38 MAPK,RHOA,TMEM175     | CDK5R1,DGKA,ESR1,F3,FAS,FN1,HBEGF,HMOX1,IFNG,MSH2,MUC1,ODC1,PDHA1,PDK4,RARA                                         | 3 | 15 |
| PTPRB     | phosphatase                | 5.09E-08 | 1.64E-02 | Akt,ERK1/2,FGFR1,KDR,PTPRB                  | B2M,CYP17A1,CYP7A1,ESR1,F3,FN1,HBEGF,HK2,MMP1,MMP2,MUC1,NOTCH1,PDK4,PTPRE,SFN,TJP1                                  | 4 | 16 |
| SNCG      | other                      | 5.09E-08 | 1.82E-02 | Akt,ERK1/2,IGF1R,SNCG                       | B2M,CYP17A1,CYP7A1,F3,FN1,HBEGF,HK2,IGF1R,MMP1,MMP2,MUC1,NOTCH1,PDK4,PTPRE,RAC1,TJP1                                | 4 | 16 |

|         |                            |          |          |                                                                   |                                                                                                                              |   |    |
|---------|----------------------------|----------|----------|-------------------------------------------------------------------|------------------------------------------------------------------------------------------------------------------------------|---|----|
| ACVRL1  | kinase                     | 5.50E-08 | 3.48E-02 | ACVRL1,ERK1/2,ERN1,MMP14,MMP2,SMAD2,Src,STAT3                     | ANG,B2M,CSF2RB,CYP17A1,CYP7A1,ESR1,FN1,HBEGF,HK2,HMOX1,IGF1R,MMP2,NOTCH1,PGK1,PPP2R1A,PTPRE,RAC1,TJP1,TLR4,XIAP              | 7 | 20 |
| H6PD    | enzyme                     | 5.64E-08 | 3.53E-02 | Akt,CASP4,CHUK,DDIT3,EIF2AK3,ERK1/2,H6PD,HSPA5,IL1B,IRF3,SMAD2    | ACADVL,ACP3,ANG,B2M,BTRC,CYP17A1,DPP4,ESR1,FAS,FN1,HBEGF,HK2,IFNG,IGF1R,MUC1,NOTCH1,PK4,PPARG,PTPRE,RAC1,STK4,TJP1,TLR4,XIAP | 9 | 24 |
| SLC37A4 | transporter                | 5.64E-08 | 3.53E-02 | Akt,CASP4,CHUK,DDIT3,EIF2AK3,ERK1/2,HSPA5,IL1B,IRF3,SLC37A4,SMAD2 | ACADVL,ACP3,ANG,B2M,BTRC,CYP17A1,DPP4,ESR1,FAS,FN1,HBEGF,HK2,IFNG,IGF1R,MUC1,NOTCH1,PK4,PPARG,PTPRE,RAC1,STK4,TJP1,TLR4,XIAP | 9 | 24 |
| GALR1   | G-protein coupled receptor | 5.85E-08 | 1.15E-02 | ERK,ERK1/2,GALR1                                                  | B2M,CDK5R1,CYP17A1,CYP7A1,FAS,FN1,HBEGF,HK2,IFNG,IGF1R,ITGB3,MUC1,ODC1,PK4,PTPRE                                             | 2 | 15 |
| GPNMB   | enzyme                     | 5.86E-08 | 2.03E-02 | c-Src,ERK,GPNMB,HIF1A,KDR                                         | CDK5R1,CYP7A1,ERBB4,ESR1,FAS,FN1,HBEGF,HK2,HMOX1,IFNG,ITGB3,MMP1,MMP2,MUC1,NAE1,NOTCH1,ODC1,PK4                              | 4 | 18 |
| ST6GAL1 | enzyme                     | 6.08E-08 | 4.08E-02 | Akt,EGFR,RB1,RELA,ST6GAL1                                         | AR,CERT1,CTCF,ESR1,FAS,FN1,HK2,HNRNPA2B1,IGF1R,MMP1,MMP2,MUC1,NOTCH1,PK4,PPARG,PTPRE,STK4,TJP1,XIAP,ZEB2                     | 5 | 20 |
| TRIP6   | cytokine                   | 6.82E-08 | 3.36E-02 | ERK,NFkB (complex),TRIP6                                          | CDK5R1,CTCF,ESR1,HBEGF,HMOX1,IFNG,ITGB3,KYNU,MMP1,MMP2,MSH2,MUC1,NOTCH1,ODC1,PK4,SENP2,XIAP                                  | 2 | 17 |
| SENP2   | peptidase                  | 7.24E-08 | 3.17E-02 | Akt,NFkB (complex),SENP2                                          | CTCF,F3,FAS,HK2,HMOX1,IFNG,IGF1R,KYNU,MMP1,MMP2,MSH2,MUC1,NOTCH1,PK4,PGK1,TJP1,XIAP                                          | 3 | 17 |
| CLTC    | other                      | 7.24E-08 | 2.74E-02 | Akt,CLTC,NFkB (complex)                                           | CD74,CTCF,F3,FAS,HMOX1,IFNG,IGF1R,KYNU,MMP1,MMP2,MSH2,MUC1,NOTCH1,PK4,SENP2,TJP1,XIAP                                        | 3 | 17 |
| GADD45B | other                      | 7.24E-08 | 3.52E-02 | ERK,GADD45B,NFkB (complex)                                        | CDK5R1,CTCF,ESR1,HBEGF,HMOX1,IFNG,ITGB3,KYNU,MMP1,MMP2,MSH2,MUC1,NOTCH1,ODC1,PK4,SENP2,XIAP                                  | 2 | 17 |
| BRAF    | kinase                     | 7.39E-08 | 4.94E-02 | BRAF,ERK,ERK1/2,MAP2K1/2,Mek,MMP2,RAF1                            | B2M,CDK5R1,CSF2RB,CYP17A1,CYP7A1,ESR1,FN1,HK2,IFNG,IGF1R,ITGB3,MMP1,MMP2,MUC1,ODC1,PK4,PPP2R1A,PTPRE,RRM1,TJP1               | 6 | 20 |
| IGFBP6  | other                      | 7.54E-08 | 2.84E-02 | ERK,IGFBP6,MAPK8,P38 MAPK                                         | CDK5R1,DGKA,ESR1,F3,FN1,HBEGF,HMOX1,IFNG,ITGB3,MMP1,MMP2,MSH2,MUC1,ODC1,PK4,RARA                                             | 3 | 16 |
| CCL2    | cytokine                   | 7.69E-08 | 2.94E-02 | CCL2,ERK,ERK1/2,MAPK8                                             | B2M,CDK5R1,CYP17A1,CYP7A1,ESR1,FAS,FN1,HK2,IGF1R,ITGB3,MMP1,MMP2,MUC1,ODC1,PK4,PTPRE,RARA                                    | 4 | 17 |
| ZDHHC6  | enzyme                     | 7.85E-08 | 1.43E-02 | Akt,ERK,ZDHHC6                                                    | CDK5R1,ESR1,F3,FAS,HBEGF,IFNG,IGF1R,ITGB3,MMP1,MMP2,MUC1,NOTCH1,ODC1,TJP1                                                    | 2 | 14 |

|             |                        |          |          |                                             |                                                                                                                              |   |    |
|-------------|------------------------|----------|----------|---------------------------------------------|------------------------------------------------------------------------------------------------------------------------------|---|----|
| NTRK3       | kinase                 | 7.85E-08 | 1.43E-02 | Akt,ERK,NTRK3                               | CDK5R1,ESR1,F3,FAS,HBEGF,IFNG,IGF1R,ITGB3,MMP1,MMP2,MUC1,NOTCH1,ODC1,TJP1                                                    | 2 | 14 |
| TLR8        | transmembrane receptor | 7.91E-08 | 4.79E-02 | ERK1/2,NFkB (complex),P38 MAPK,RELA,TLR8    | B2M,CERT1,CYP17A1,CYP7A1,DGKA,ESR1,F3,FAS,HBEGF,HK2,IFNG,IGF1R,ITGB3,KYNU,MMP1,MMP2,NOTCH1,PPARG,PTPRE,RARA,SENP2,STK4,XIAP  | 4 | 23 |
| CDH13       | other                  | 8.34E-08 | 1.90E-02 | Akt,CDH13,EGFR,GSK3B                        | AR,F3,HK2,HNRNPA2B1,IFNG,IGF1R,MMP1,MMP2,MUC1,NOTCH1,PKD4,PTPRE,TJP1,XIAP,ZEB2                                               | 3 | 15 |
| FLT3LG      | cytokine               | 8.48E-08 | 1.48E-02 | Akt,ERK,FLT3LG                              | CDK5R1,ESR1,F3,FAS,HBEGF,IFNG,IGF1R,ITGB3,MMP1,MMP2,MUC1,NOTCH1,ODC1,TJP1                                                    | 2 | 14 |
| FGFR3-TACC3 | fusion gene/product    | 8.48E-08 | 1.52E-02 | Akt,ERK,FGFR3-TACC3                         | CDK5R1,ESR1,F3,FAS,HBEGF,IFNG,IGF1R,ITGB3,MMP1,MMP2,MUC1,NOTCH1,ODC1,TJP1                                                    | 2 | 14 |
| PPP2R5E     | phosphatase            | 8.57E-08 | 1.44E-02 | ERK,NFkB (complex),PPP2R5E                  | CDK5R1,CTCF,ESR1,FAS,FN1,HBEGF,HMOX1,ITGB3,KYNU,MSH2,MUC1,NOTCH1,ODC1,PKD4,SENP2,XIAP                                        | 3 | 16 |
| TFF3        | other                  | 8.59E-08 | 2.18E-02 | Akt,EGFR,ERBB2,TFF3                         | BMP1,ERBB4,ESR1,FN1,GART,HK2,HNRNPA2B1,IFNG,IGF1R,MMP1,MMP2,MUC1,NOTCH1,PKD4,PGK1,PPARG,PTPRE,PTPRF,RRM1,SMTN,TJP1,XIAP,ZEB2 | 3 | 23 |
| IL5         | cytokine               | 8.59E-08 | 4.85E-02 | Akt,ERK1/2,IL5,JAK2,Mapk,MAPK1,RAS,STAT5a/b | AR,B2M,CSF2RB,CYP17A1,CYP7A1,ESR1,F3,FN1,HBB,HBEGF,HK2,IFNG,MMP1,MMP2,MUC1,NOTCH1,NR1I3,PKD4,PTPRE,RARA,TJP1,TRIM21,XIAP     | 8 | 23 |
| LGALS8      | other                  | 8.65E-08 | 2.31E-02 | ERK1/2,LGALS8,RELA                          | B2M,CERT1,CTCF,CYP17A1,CYP7A1,ESR1,FAS,FN1,HBEGF,HK2,IFNG,IGF1R,MMP1,MMP2,PPARG,PTPRE,STK4                                   | 2 | 17 |
| CAT         | enzyme                 | 8.65E-08 | 3.99E-02 | CAT,ERK,NFkB (complex)                      | CDK5R1,CTCF,ESR1,HBEGF,HMOX1,IFNG,ITGB3,KYNU,MMP1,MMP2,MSH2,MUC1,NOTCH1,ODC1,PKD4,SENP2,XIAP                                 | 2 | 17 |
| ADTRP       | enzyme                 | 8.94E-08 | 1.47E-02 | ADTRP,ERK1/2,F10,MAPK8,MMP2,MMP9,TFPI       | B2M,CSF2RB,CYP17A1,CYP7A1,ESR1,FN1,HBEGF,HK2,IGF1R,MMP1,MMP2,PPP2R1A,PTPRE,RARA,TJP1                                         | 5 | 15 |
| KL          | enzyme                 | 9.58E-08 | 1.69E-02 | Akt,ERK1/2,KL                               | B2M,CYP17A1,CYP7A1,ESR1,F3,FN1,HBEGF,HK2,IGF1R,MMP1,MUC1,NOTCH1,PKD4,PTPRE,TJP1                                              | 2 | 15 |
| KDR         | kinase                 | 9.73E-08 | 2.91E-02 | Akt,CASP1,ERK1/2,KDR,SRC (family)           | B2M,CYP17A1,CYP7A1,ESR1,F3,HBEGF,HK2,IFNG,ITGB3,MMP1,MMP2,MUC1,NOTCH1,PKD4,PTPRE,TJP1                                        | 5 | 16 |
| FDPS        | enzyme                 | 9.88E-08 | 1.61E-02 | Akt,ERK,FDPS                                | CDK5R1,ESR1,F3,FAS,HBEGF,IFNG,IGF1R,ITGB3,MMP1,MMP2,MUC1,NOTCH1,ODC1,TJP1                                                    | 2 | 14 |



|         |                        |          |          |                                                                        |                                                                                                        |   |    |
|---------|------------------------|----------|----------|------------------------------------------------------------------------|--------------------------------------------------------------------------------------------------------|---|----|
| SPINK7  | other                  | 1.03E-07 | 8.40E-03 | ERK,SPINK7,SRC                                                         | CDK5R1,ESR1,FAS,HBEGF,IFNG,IGF1R,ITGB3,MMP1,MMP2,MUC1,ODC1,PDK4                                        | 2 | 12 |
| ANGPT4  | growth factor          | 1.03E-07 | 1.93E-02 | Akt,ANGPT4,ERK1/2                                                      | B2M,CYP17A1,CYP7A1,ESR1,F3,FN1,HBEGF,HK2,MMP1,MMP2,MUC1,NO<br>TCH1,PDK4,PTPRE,TJP1                     | 2 | 15 |
| PIK3R5  | kinase                 | 1.03E-07 | 1.93E-02 | Akt,ERK1/2,PIK3R5                                                      | B2M,CYP17A1,CYP7A1,ESR1,F3,FN1,HBEGF,HK2,MMP1,MMP2,MUC1,NO<br>TCH1,PDK4,PTPRE,TJP1                     | 2 | 15 |
| MOSPD2  | other                  | 1.03E-07 | 1.93E-02 | Akt,ERK1/2,MOSPD2                                                      | B2M,CYP17A1,CYP7A1,ESR1,F3,FN1,HBEGF,HK2,MMP1,MMP2,MUC1,NO<br>TCH1,PDK4,PTPRE,TJP1                     | 2 | 15 |
| IL2RB   | transmembrane receptor | 1.03E-07 | 1.93E-02 | Akt,ERK1/2,IL2RB                                                       | B2M,CYP17A1,CYP7A1,ESR1,F3,FN1,HBEGF,HK2,MMP1,MMP2,MUC1,NO<br>TCH1,PDK4,PTPRE,TJP1                     | 2 | 15 |
| LCP2    | other                  | 1.03E-07 | 2.79E-02 | ERK,Jnk,LCP2,PIK3R1,RAC1                                               | AR,BTRC,CDK5R1,ESR1,FAS,HBEGF,ITGB3,MMP1,MMP2,MSH2,MUC1,ODC1,PDK4,RARA,XIAP                            | 4 | 15 |
| PRR14   | other                  | 1.07E-07 | 1.77E-02 | Akt,ERK,PRR14                                                          | CDK5R1,ESR1,F3,FAS,HBEGF,IFNG,IGF1R,ITGB3,MMP1,MMP2,MUC1,NO<br>TCH1,ODC1,TJP1                          | 2 | 14 |
| STAM    | other                  | 1.10E-07 | 1.98E-02 | Akt,ERK1/2,STAM                                                        | B2M,CYP17A1,CYP7A1,ESR1,F3,FN1,HBEGF,HK2,MMP1,MMP2,MUC1,NO<br>TCH1,PDK4,PTPRE,TJP1                     | 2 | 15 |
| CDH2    | other                  | 1.10E-07 | 1.99E-02 | Akt,CDH2,ERK1/2                                                        | B2M,CYP17A1,CYP7A1,ESR1,F3,FN1,HBEGF,HK2,MMP1,MMP2,MUC1,NO<br>TCH1,PDK4,PTPRE,TJP1                     | 2 | 15 |
| FGF7    | growth factor          | 1.10E-07 | 2.19E-02 | Akt,ERK,FGF7,MAPK8                                                     | CDK5R1,ESR1,F3,FAS,HBEGF,IFNG,IGF1R,ITGB3,MMP1,MMP2,MUC1,NO<br>TCH1,ODC1,RARA,TJP1                     | 3 | 15 |
| CLEC4A  | transmembrane receptor | 1.18E-07 | 2.08E-02 | Akt,CLEC4A,ERK1/2                                                      | B2M,CYP17A1,CYP7A1,ESR1,F3,FN1,HBEGF,HK2,MMP1,MMP2,MUC1,NO<br>TCH1,PDK4,PTPRE,TJP1                     | 2 | 15 |
| CLEC4C  | other                  | 1.26E-07 | 2.19E-02 | Akt,CLEC4C,ERK1/2                                                      | B2M,CYP17A1,CYP7A1,ESR1,F3,FN1,HBEGF,HK2,MMP1,MMP2,MUC1,NO<br>TCH1,PDK4,PTPRE,TJP1                     | 2 | 15 |
| LAMTOR1 | other                  | 1.29E-07 | 3.64E-02 | AKT1,ERK1/2,Gsk3,LAMTOR1,MTOR,MTORC1,RHOA,RICTOR,RPS6KB1,SREBF1,SREBF2 | AR,B2M,CHKA,CYP17A1,CYP7A1,ESR1,FABP3,FABP7,FN1,GTF2I,HBEGF,HK2,HMOX1,IFNG,MMP2,MUC1,PDHA1,PPARG,PTPRE | 9 | 19 |
| IL1RAP  | transmembrane receptor | 1.33E-07 | 2.14E-02 | Akt,ERK,IL1RAP                                                         | CDK5R1,ESR1,F3,FAS,HBEGF,IFNG,IGF1R,ITGB3,MMP1,MMP2,MUC1,NO<br>TCH1,ODC1,TJP1                          | 2 | 14 |
| CXCL13  | cytokine               | 1.34E-07 | 2.21E-02 | Akt,CXCL13,ERK1/2                                                      | B2M,CYP17A1,CYP7A1,ESR1,F3,FN1,HBEGF,HK2,MMP1,MMP2,MUC1,NO<br>TCH1,PDK4,PTPRE,TJP1                     | 2 | 15 |

|           |                        |          |          |                                                                           |                                                                                                                              |    |    |
|-----------|------------------------|----------|----------|---------------------------------------------------------------------------|------------------------------------------------------------------------------------------------------------------------------|----|----|
| GNA11     | enzyme                 | 1.41E-07 | 3.15E-02 | Akt,AKT1,ERK1/2,GNA11,RHOA                                                | B2M,CYP17A1,CYP7A1,ESR1,F3,FN1,HBEGF,HK2,HMOX1,MMP2,MUC1,NOTCH1,PDHA1,PKK4,PTPRE,TJP1                                        | 4  | 16 |
| COP1      | enzyme                 | 1.43E-07 | 2.04E-02 | Akt,COP1,ERK,SFN                                                          | CDK5R1,DSG2,ESR1,F3,FAS,HBEGF,IFNG,IGF1R,ITGB3,MMP1,MMP2,MUC1,NOTCH1,ODC1                                                    | 3  | 14 |
| PRKD3     | kinase                 | 1.54E-07 | 1.94E-02 | Akt,ERK,PRKD3,RPS6KB1                                                     | CDK5R1,ESR1,F3,FAS,HBEGF,IFNG,IGF1R,ITGB3,MMP1,MMP2,MUC1,NOTCH1,ODC1,TJP1                                                    | 3  | 14 |
| LINC00461 | other                  | 1.64E-07 | 2.63E-02 | Akt,ERK1/2,LINC00461                                                      | B2M,CYP17A1,CYP7A1,ESR1,F3,FN1,HBEGF,HK2,MMP1,MMP2,MUC1,NOTCH1,PKK4,PTPRE,TJP1                                               | 2  | 15 |
| FXN       | kinase                 | 1.64E-07 | 1.17E-02 | ERK1/2,FXN,P38 MAPK                                                       | B2M,CYP17A1,CYP7A1,DGKA,ESR1,F3,FAS,HBEGF,HK2,HMOX1,IGF1R,ITGB3,MSH2,PTPRE,RARA                                              | 2  | 15 |
| ERK       | group                  | 1.72E-07 | 9.70E-03 | ERK                                                                       | CDK5R1,ESR1,FAS,HBEGF,IFNG,ITGB3,MMP1,MMP2,MUC1,ODC1,PKK4                                                                    | 1  | 11 |
| CUL5      | ion channel            | 1.76E-07 | 3.48E-02 | Akt,CUL5,EGFR,ERBB2                                                       | BMP1,ERBB4,ESR1,FN1,GART,HK2,HNRNPA2B1,IFNG,IGF1R,MMP1,MMP2,MUC1,NOTCH1,PKK4,PGK1,PPARG,PTPRE,PTPRF,RRM1,SMTN,TJP1,XIAP,ZEB2 | 3  | 23 |
| LBP       | transporter            | 1.81E-07 | 4.01E-02 | IRF3,Jnk,LBP,P38 MAPK,STAT1,TYK2                                          | BTRC,C1R,DGKA,F3,FAS,HMOX1,IFNG,ITGB3,MMP1,MMP2,MSH2,MUC1,RARA,STK4,TRIM21,WARS1,XIAP                                        | 5  | 17 |
| BTRC      | enzyme                 | 1.81E-07 | 3.07E-02 | ATF4,BTRC,MDM2,MTOR,NFkB (complex),NFKB2,PHLPP1                           | AR,CHKA,CTCF,FAS,FN1,HMOX1,IFNG,IGF1R,KYNU,MMP1,MMP2,MSH2,MUC1,NOTCH1,PRKCB,SENP2,SFN                                        | 6  | 17 |
| CD2       | transmembrane receptor | 1.91E-07 | 1.54E-02 | CD2,ERK1/2,Mapk,STAT5a/b                                                  | B2M,CYP17A1,CYP7A1,ESR1,FN1,HBEGF,HK2,IFNG,IGF1R,MMP1,MMP2,NR1I3,PTPRE,RARA                                                  | 4  | 14 |
| HP        | peptidase              | 1.91E-07 | 4.20E-03 | EGFR,HP                                                                   | AR,ESR1,F3,HK2,HMOX1,HNRNPA2B1,IFNG,MMP1,PTPRE,XIAP,ZEB2                                                                     | 2  | 11 |
| BCAN      | other                  | 1.91E-07 | 5.00E-03 | BCAN,EGFR                                                                 | AR,ESR1,F3,HK2,HNRNPA2B1,IFNG,ITGB3,MMP1,PTPRE,XIAP,ZEB2                                                                     | 2  | 11 |
| SLC36A4   | transporter            | 2.02E-07 | 1.94E-02 | Akt,AKT1,EPRS1,MTOR,MTORC1,PAK1,RHOA,RICTOR,RPS6KB1,SLC36A4,SREBF1,SREBF2 | AR,CHKA,F3,FABP3,FABP7,FN1,GTF2I,HK2,HMOX1,IFNG,MMP2,MUC1,NOTCH1,PDHA1,PKK4,PPARG,TJP1                                       | 10 | 17 |
| SLC36A1   | transporter            | 2.02E-07 | 1.94E-02 | Akt,AKT1,EPRS1,MTOR,MTORC1,PAK1,RHOA,RICTOR,RPS6KB1,SLC36A1,SREBF1,SREBF2 | AR,CHKA,F3,FABP3,FABP7,FN1,GTF2I,HK2,HMOX1,IFNG,MMP2,MUC1,NOTCH1,PDHA1,PKK4,PPARG,TJP1                                       | 10 | 17 |
| ANXA5     | transporter            | 2.05E-07 | 2.39E-02 | ANXA5,ERK1/2,MAP2K1/2,RAF1,RAS                                            | B2M,CYP17A1,CYP7A1,ESR1,FAS,FN1,HBEGF,HK2,IFNG,IGF1R,MMP1,MMP2,PTPRE,RRM1                                                    | 4  | 14 |
| RBP4      | other                  | 2.15E-07 | 2.66E-02 | ERK1/2,P38 MAPK,RBP4                                                      | B2M,CYP17A1,CYP7A1,DGKA,ESR1,F3,FAS,FN1,HBEGF,HK2,HMOX1,IGF1R,ITGB3,MSH2,PTPRE,RARA                                          | 3  | 16 |

|                    |                                   |          |          |                                                                         |                                                                                                  |    |    |
|--------------------|-----------------------------------|----------|----------|-------------------------------------------------------------------------|--------------------------------------------------------------------------------------------------|----|----|
| PPP2R2A            | phosphatase                       | 2.20E-07 | 1.95E-02 | AP2M1,ERK1/2,MAP2K1/2,PPP2R2A                                           | B2M,CD74,CYP17A1,CYP7A1,ESR1,FAP,FN1,HBEGF,HK2,IGF1R,MMP1,MMP2,PTPRE,RRM1                        | 4  | 14 |
| LOC102724788/PRODH | enzyme                            | 2.26E-07 | 2.59E-02 | CTNNB1,EGFR,GSK3B,LOC102724788/PRODH                                    | AR,ESR1,F3,FN1,HBEGF,HK2,HNRNPA2B1,IFNG,IGF1R,MMP1,MMP2,PTPRE,RAC1,XIAP,ZEB2                     | 3  | 15 |
| SMO                | G-protein coupled receptor        | 2.26E-07 | 4.56E-02 | Akt,Mapk,NFKB1,PRKCB,RELA,SMO                                           | CERT1,CTCF,F3,FAS,FN1,HBB,IFNG,IGF1R,MMP1,MMP2,MUC1,NOTCH1,NR1I3,PDK4,PPARG,STK4,TJP1            | 6  | 17 |
| ANO1               | ion channel                       | 2.34E-07 | 5.60E-03 | ANO1,EGFR                                                               | AR,ESR1,F3,HK2,HNRNPA2B1,IFNG,MMP1,NOTCH1,PTPRE,XIAP,ZEB2                                        | 2  | 11 |
| EGLN               | group                             | 2.34E-07 | 5.70E-03 | AKT1,EGLN,Gsk3,GSK3B,MTOR,MTORC1,RHOA,RPS6KB1,SREBF1,SREBF2             | AR,CHKA,ESR1,FABP3,FABP7,GTF2I,HK2,HMOX1,IFNG,IGF1R,MUC1,PDHA1,PDK3,PPARG,PYGL,SH2B2,XIAP,ZNF292 | 9  | 18 |
| EPRS1              | enzyme                            | 2.34E-07 | 1.74E-02 | AKT1,EPRS1,Gsk3,GSK3B,MTOR,MTORC1,RHOA,RICTOR,SREBF1,SREBF2,STAT1,STAT6 | AR,C1R,CHKA,ESR1,FABP3,FABP7,FAS,FN1,GTF2I,HK2,HMOX1,IFNG,IGF1R,PDHA1,PPARG,TRIM21,WARS1,XIAP    | 10 | 18 |
| EDNRB              | G-protein coupled receptor        | 2.41E-07 | 3.27E-02 | Akt,EDNRB,ERK1/2                                                        | B2M,CYP17A1,CYP7A1,ESR1,F3,FN1,HBEGF,HK2,MMP1,MMP2,MUC1,NOTCH1,PDK4,PTPRE,TJP1                   | 2  | 15 |
| TNC                | other                             | 2.41E-07 | 3.19E-02 | Akt,ERK1/2,TNC                                                          | B2M,CYP17A1,CYP7A1,ESR1,F3,FN1,HBEGF,HK2,MMP1,MMP2,MUC1,NOTCH1,PDK4,PTPRE,TJP1                   | 3  | 15 |
| mir-181            | microRNA                          | 2.57E-07 | 2.81E-02 | mir-181,MMP2,MMP9,NFkB (complex)                                        | AR,CSF2RB,CTCF,FAS,HMOX1,IFNG,KYNU,MMP1,MMP2,MSH2,NOTCH1,PPP2R1A,SEN2,TJP1,XIAP                  | 4  | 15 |
| DLG1               | kinase                            | 2.57E-07 | 4.03E-02 | Akt,DLG1,ERK1/2                                                         | B2M,CYP17A1,CYP7A1,ESR1,F3,FN1,HBEGF,HK2,IGF1R,MMP1,MUC1,NOTCH1,PDK4,PTPRE,TJP1                  | 2  | 15 |
| ITGA4              | transmembrane receptor            | 2.57E-07 | 3.39E-02 | Akt,ERK1/2,ITGA4                                                        | B2M,CYP17A1,CYP7A1,ESR1,F3,FN1,HBEGF,HK2,MMP1,MMP2,MUC1,NOTCH1,PDK4,PTPRE,TJP1                   | 2  | 15 |
| AGT                | growth factor                     | 2.58E-07 | 5.60E-03 | AGT,EGFR                                                                | AR,ESR1,F3,HK2,HNRNPA2B1,IFNG,MMP1,PPARG,PTPRE,XIAP,ZEB2                                         | 2  | 11 |
| mir-96             | microRNA                          | 2.58E-07 | 3.49E-02 | BCR-ABL1,GSK3B,mir-96,NFkB (complex),STAT1,STAT5a/b                     | C1R,CTCF,FN1,HMOX1,IFNG,IGF1R,KYNU,MMP1,MMP2,MSH2,MUC1,NOTCH1,RAC1,RARA,SEN2,TRIM21,WARS1,XIAP   | 5  | 18 |
| RORA               | ligand-dependent nuclear receptor | 2.71E-07 | 3.92E-02 | CYP19A1,Jnk,P38 MAPK,RORA,Sod                                           | BTRC,DGKA,ESR1,F3,FAS,FN1,HMOX1,IFNG,ITGB3,MMP1,MMP2,MSH2,RARA,XIAP                              | 3  | 14 |

|        |                            |          |          |                                                                                  |                                                                                                                                |    |    |
|--------|----------------------------|----------|----------|----------------------------------------------------------------------------------|--------------------------------------------------------------------------------------------------------------------------------|----|----|
| PLD2   | enzyme                     | 2.74E-07 | 3.01E-02 | Akt,ERK1/2,PLD2                                                                  | B2M,CYP17A1,CYP7A1,ESR1,F3,FN1,HBEGF,HK2,MMP1,MMP2,MUC1,NOTCH1,PTPRE,TJP1                                                      | 2  | 15 |
| HSPB1  | other                      | 2.79E-07 | 2.05E-02 | ERK1/2,HSF1,HSPB1,Jnk                                                            | B2M,BTRC,CYP17A1,CYP7A1,ESR1,FN1,HBEGF,HK2,HSP90AB1,IFNG,IGF1R,MSH2,PGK1,PTPRE,RARA,TTR,XIAP                                   | 3  | 17 |
| F7     | peptidase                  | 2.87E-07 | 4.53E-02 | AKT1,EIF4E,ERK1/2,F7,GSK3B,MAPK8,RPS6KB1                                         | AR,B2M,CYP17A1,CYP7A1,F3,FN1,HBEGF,HK2,HMOX1,MMP1,MMP2,MUC1,PTPRE,RAC1,RARA,XIAP                                               | 7  | 16 |
| DICER1 | enzyme                     | 3.02E-07 | 1.27E-02 | DICER1,EGFR,MET                                                                  | AR,ESR1,F3,FN1,HK2,HMOX1,HNRNPA2B1,IFNG,MMP1,MMP2,PTPRE,XIAP,ZEB2                                                              | 3  | 13 |
| GRB7   | other                      | 3.03E-07 | 1.39E-02 | ERK1/2,GRB7,RAS                                                                  | B2M,CYP17A1,CYP7A1,ESR1,FN1,HBEGF,HK2,IFNG,IGF1R,MMP1,MMP2,PTPRE                                                               | 2  | 12 |
| SHC4   | other                      | 3.03E-07 | 1.39E-02 | ERK1/2,RAS,SHC4                                                                  | B2M,CYP17A1,CYP7A1,ESR1,FN1,HBEGF,HK2,IFNG,IGF1R,MMP1,MMP2,PTPRE                                                               | 2  | 12 |
| OPA1   | enzyme                     | 3.21E-07 | 3.46E-02 | Akt,ERK1/2,GLB1,LIPE,OPA1,PI3K (complex),Pkc(s),PNPLA2                           | B2M,CYP17A1,CYP7A1,ESR1,F3,FN1,HBEGF,HK2,MMP1,MUC1,NOTCH1,PC,PTPRE,TJP1,XIAP                                                   | 5  | 16 |
| ORAI1  | ion channel                | 3.50E-07 | 4.82E-02 | CD3E,ERK1/2,LCK,MAP2K1,ORAI1,PTPN6,RAF1                                          | B2M,CYP17A1,CYP7A1,ESR1,F3,FAS,FN1,HBEGF,HK2,IFNG,IGF1R,MMP1,MMP2,PPARG,PTPRE                                                  | 6  | 15 |
| MARK4  | kinase                     | 3.50E-07 | 1.39E-02 | AKT1,Gsk3,GSK3B,MARK4,MTOR,MTORC1,RHOA,RICTOR,RPS6KB1,SREBF1,SREBF2,TEAD,YAP/TAZ | AR,CHKA,ESR1,FABP3,FABP7,FN1,GTF2I,HK2,HMOX1,IFNG,IGF1R,MUC1,PDHA1,PPARG,XIAP                                                  | 10 | 15 |
| FLT1   | kinase                     | 3.51E-07 | 2.13E-02 | ERK1/2,FLT1,Ras homolog,SRC (family)                                             | B2M,CYP17A1,CYP7A1,ESR1,HBEGF,HK2,IGF1R,ITGB3,MMP1,MMP2,NOTCH1,PTPRE,TJP1                                                      | 4  | 13 |
| HTR7   | G-protein coupled receptor | 3.58E-07 | 1.16E-02 | ADCY,ERK1/2,HTR7                                                                 | B2M,CYP17A1,CYP7A1,ESR1,FN1,HBEGF,HK2,IGF1R,MMP1,MMP2,NFATC1,PTPRE                                                             | 2  | 12 |
| PHB    | transcription regulator    | 3.59E-07 | 4.21E-02 | AR,CTNNB1,ERK1/2,MMP2,NFkB (complex),PHB                                         | B2M,CSF2RB,CTCF,CYP17A1,CYP7A1,ESR1,FN1,HBEGF,HK2,HMOX1,IFNG,KYNU,MMP2,MSH2,NOTCH1,PPP2R1A,PTPRE,SEN2,SMTN,TJP1,TLR4,WEE1,XIAP | 6  | 23 |
| HMMR   | transmembrane receptor     | 3.78E-07 | 2.31E-02 | ERK1/2,HMMR,SMAD2                                                                | B2M,CYP17A1,CYP7A1,ESR1,FN1,HBEGF,HK2,IGF1R,MMP1,MMP2,PTPRE,RAC1,XIAP                                                          | 3  | 13 |
| TRIO   | kinase                     | 4.06E-07 | 5.00E-02 | Jnk,P38 MAPK,RAC1,RHOA,TRIO                                                      | BTRC,DGKA,F3,FAS,FN1,HMOX1,IFNG,ITGB3,MMP1,MMP2,MSH2,PDHA1,RARA,XIAP                                                           | 4  | 14 |

|          |                            |          |          |                                                   |                                                                                                             |   |    |
|----------|----------------------------|----------|----------|---------------------------------------------------|-------------------------------------------------------------------------------------------------------------|---|----|
| mir-223  | microRNA                   | 4.58E-07 | 1.05E-02 | EGFR, mir-223, SP3                                | AR, ESR1, F3, HK2, HMGCS1, HNRNPA2B1, IFNG, IGF1R, MMP1, PTPRE, XIAP, ZEB2                                  | 3 | 12 |
| ELF3     | transcription regulator    | 4.58E-07 | 1.57E-02 | ELF3, ERK1/2                                      | B2M, CYP17A1, CYP7A1, ESR1, FN1, HBEGF, HK2, IGF1R, MMP1, MMP2, PPAR G, PTPRE                               | 2 | 12 |
| BCR-ABL1 | fusion gene/product        | 4.93E-07 | 3.88E-02 | BCR-ABL1, GSK3B, NFkB (complex), STAT1, STAT5a/b  | C1R, CTCF, HMOX1, IFNG, IGF1R, KYNU, MMP1, MMP2, MSH2, MUC1, NOTCH1, RAC1, RARA, SENP2, TRIM21, WARS1, XIAP | 4 | 17 |
| FPR1     | G-protein coupled receptor | 5.05E-07 | 3.46E-02 | EGFR, FPR1, Jnk                                   | AR, BTRC, ESR1, F3, HK2, HNRNPA2B1, MMP1, MMP2, MSH2, PTPRE, RARA, XIAP, ZEB2                               | 2 | 13 |
| PTPN12   | phosphatase                | 5.49E-07 | 8.50E-03 | ABL1, EGFR, PTPN12                                | AR, ESR1, F3, FAS, HK2, HNRNPA2B1, IFNG, MMP1, PTPRE, XIAP, ZEB2                                            | 2 | 11 |
| HCAR2    | G-protein coupled receptor | 5.82E-07 | 1.47E-02 | ERK1/2, HCAR2                                     | B2M, CYP17A1, CYP7A1, ESR1, FN1, HBEGF, HK2, IGF1R, MMP1, MMP2, PTPRE, WEE1                                 | 2 | 12 |
| DPP4     | peptidase                  | 5.97E-07 | 3.71E-02 | DPP4, ERK1/2, P38 MAPK, PARP1                     | B2M, CYP17A1, CYP7A1, DGKA, ESR1, F3, FAS, FN1, HBEGF, HK2, HMOX1, IGF1R, MSH2, PTPRE, RARA                 | 3 | 15 |
| PTPRE    | phosphatase                | 5.98E-07 | 4.30E-02 | Akt, ERK1/2, PTPRE                                | B2M, CYP17A1, CYP7A1, ESR1, F3, FN1, HBEGF, HK2, MMP1, MMP2, MUC1, NOTCH1, PDK4, TJP1                       | 2 | 14 |
| mir-146  | microRNA                   | 6.01E-07 | 8.20E-03 | EGFR, mir-146                                     | AR, ESR1, F3, HK2, HNRNPA2B1, IFNG, MMP1, PTPRE, TLR4, XIAP, ZEB2                                           | 2 | 11 |
| TRPM2    | ion channel                | 6.24E-07 | 2.23E-02 | AKT1, ERK1/2, PTK2B, TRPM2                        | B2M, CYP17A1, CYP7A1, ESR1, FN1, HBEGF, HK2, HMOX1, IFNG, IGF1R, MMP1, MMP2, PTPRE                          | 3 | 13 |
| ADAM15   | peptidase                  | 6.57E-07 | 9.60E-03 | ADAM15, EGFR, MMP9                                | AR, ESR1, F3, HK2, HNRNPA2B1, IFNG, MMP1, PTPRE, TJP1, XIAP, ZEB2                                           | 3 | 11 |
| VEGFD    | growth factor              | 6.81E-07 | 2.00E-02 | ERK1/2, KDR, VEGFD                                | B2M, CYP17A1, CYP7A1, ESR1, FN1, HBEGF, HK2, IGF1R, MMP1, MMP2, NOTCH1, PTPRE                               | 2 | 12 |
| TRIM37   | enzyme                     | 7.22E-07 | 3.58E-02 | NFkB (complex), TRIM37                            | CTCF, CUL1, FAS, HMOX1, IFNG, KYNU, MMP1, MMP2, MSH2, NOTCH1, PEX5, SENP2, SFN, XIAP                        | 2 | 14 |
| RUNX1    | transcription regulator    | 8.16E-07 | 3.91E-02 | NFkB (complex), RUNX1                             | ALOX12, CTCF, EP300, FAS, HMOX1, IFNG, ITGB3, KYNU, MMP1, MMP2, MSH2, NOTCH1, SENP2, XIAP                   | 2 | 14 |
| DDIT3    | transcription regulator    | 8.56E-07 | 2.68E-02 | DDIT3, ERK1/2                                     | B2M, CYP17A1, CYP7A1, ESR1, FN1, HBEGF, HK2, IFNG, IGF1R, MMP1, MMP2, PTPRE                                 | 2 | 12 |
| RIPK3    | kinase                     | 8.68E-07 | 3.93E-02 | MAPKAPK2, MLKL, MMP2, MMP9, NFkB (complex), RIPK3 | CSF2RB, CTCF, FAS, HMOX1, IFNG, KYNU, MMP1, MMP2, MSH2, NOTCH1, PP2R1A, SENP2, TJP1, XIAP                   | 3 | 14 |

|                                                  |                            |          |          |                                                               |                                                                           |   |    |
|--------------------------------------------------|----------------------------|----------|----------|---------------------------------------------------------------|---------------------------------------------------------------------------|---|----|
| PDK4                                             | kinase                     | 8.78E-07 | 3.33E-02 | ERK1/2,KRAS,PDK4                                              | B2M,CYP17A1,CYP7A1,ESR1,FN1,HBEGF,HK2,IGF1R,MMP1,MMP2,PC,PTPRE,YY1        | 3 | 13 |
| CDH17                                            | transporter                | 9.95E-07 | 3.07E-02 | CDH17,ERK1/2,ITGB1                                            | B2M,CYP17A1,CYP7A1,ESR1,FN1,HBEGF,HK2,IGF1R,ITGB3,MMP1,MMP2,PTPRE         | 2 | 12 |
| NDFIP1                                           | other                      | 9.95E-07 | 3.54E-02 | Akt,Jnk,NDFIP1                                                | BTRC,F3,IFNG,IGF1R,MMP1,MSH2,MUC1,NOTCH1,PDK4,RARA,TJP1,XIAPP             | 2 | 12 |
| AHSA1                                            | other                      | 1.00E-06 | 4.70E-02 | AHSA1,ERK1/2,MAP2K1/2,RAF1                                    | B2M,CYP17A1,CYP7A1,ESR1,FAS,FN1,HBEGF,HK2,IGF1R,MMP1,MMP2,PTPRE,RRM1      | 3 | 13 |
| HES1                                             | transcription regulator    | 1.00E-06 | 4.40E-02 | AKT1,ERK1/2,HES1,PRKAA                                        | AR,B2M,CYP17A1,CYP7A1,ESR1,FN1,HBEGF,HK2,HMOX1,IGF1R,MMP1,MMP2,PTPRE      | 3 | 13 |
| SNAPIN                                           | other                      | 1.17E-06 | 3.93E-02 | P38 MAPK,SNAPIN,STAT1                                         | C1R,DGKA,F3,FAS,FN1,HMOX1,ITGB3,MMP1,MMP2,MSH2,MUC1,RARA,TRIM21,WARS1     | 2 | 14 |
| MTORC1                                           | complex                    | 1.24E-06 | 1.93E-02 | AKT1,Gsk3,GSK3B,MTOR,MTORC1,RHOA,RICTOR,RPS6KB1,SREBF1,SREBF2 | AR,CHKA,ESR1,FABP3,FABP7,GTF2I,HK2,HMOX1,IFNG,IGF1R,MUC1,PDHA1,PPARG,XIAP | 9 | 14 |
| CCR2                                             | G-protein coupled receptor | 1.39E-06 | 4.08E-02 | CCR2,ERK1/2,SMAD3                                             | B2M,CYP17A1,CYP7A1,ESR1,HBEGF,HK2,IFNG,IGF1R,MMP1,MMP2,PTPRE,RAC1,XIAP    | 2 | 13 |
| EGFR                                             | kinase                     | 1.40E-06 | 1.20E-02 | EGFR                                                          | AR,ESR1,F3,HK2,HNRNPA2B1,IFNG,MMP1,PTPRE,XIAP,ZEB2                        | 1 | 10 |
| NTN1                                             | growth factor              | 1.54E-06 | 3.94E-02 | Creb,ERK1/2,NTN1,RHOA                                         | B2M,CYP17A1,CYP7A1,ESR1,FN1,HBEGF,HK2,IGF1R,MMP1,MMP2,PDHA1,PTPRE         | 3 | 12 |
| ERK1/2                                           | group                      | 1.65E-06 | 2.75E-02 | ERK1/2                                                        | B2M,CYP17A1,CYP7A1,ESR1,FN1,HBEGF,HK2,IGF1R,MMP1,MMP2,PTPRE               | 1 | 11 |
| FGF8                                             | growth factor              | 2.15E-06 | 3.38E-02 | FGF8,FGFR1,P38 MAPK                                           | DGKA,F3,FAS,FN1,HK2,HMOX1,ITGB3,MMP1,MMP2,MSH2,RARA,SFN,SUB1              | 3 | 13 |
| miR-193a-3p<br>(and other miRNAs w/seed ACUGGCC) | mature microRNA            | 3.04E-06 | 3.75E-02 | Akt,miR-193a-3p (and other miRNAs w/seed ACUGGCC),MTOR        | AR,CHKA,ERBB4,F3,IFNG,IGF1R,MMP2,MUC1,NOTCH1,PDK4,TJP1                    | 3 | 11 |
| mir-193                                          | microRNA                   | 3.52E-06 | 3.97E-02 | Akt,mir-193,MTOR                                              | AR,CHKA,ERBB4,F3,IFNG,IGF1R,MMP2,MUC1,NOTCH1,PDK4,TJP1                    | 3 | 11 |
| ATF3                                             | transcription regulator    | 6.57E-06 | 3.68E-02 | Akt,ATF3                                                      | DCTD,F3,IFNG,IGF1R,MMP2,MSH2,MUC1,NOTCH1,PDK4,RRM1,TJP1                   | 2 | 11 |

|        |                                   |          |          |                        |                                                              |   |    |
|--------|-----------------------------------|----------|----------|------------------------|--------------------------------------------------------------|---|----|
| PCGEM1 | other                             | 2.24E-05 | 8.00E-04 | PCGEM1                 | CANT1,G6PD,HK2,PDHA1,PDK4,PGK1                               | 1 | 6  |
| DDX5   | enzyme                            | 2.38E-05 | 1.15E-02 | DDX5,let-7             | AR,FN1,HK2,IGF1R,ITGB3,MAPK6,MDH1,NDUFAB1,PA2G4,STARD13,TLR4 | 2 | 11 |
| FENDRR | other                             | 3.28E-05 | 2.24E-02 | FENDRR,MMP2,MMP9,STAT1 | C1R,CSF2RB,FAS,FN1,MUC1,PPP2R1A,TJP1,TRIM21,WARS1            | 4 | 9  |
| MCAM   | other                             | 3.40E-05 | 3.20E-03 | MCAM,MMP2              | CSF2RB,FN1,MMP2,PPP2R1A,TJP1                                 | 2 | 5  |
| let-7  | microRNA                          | 3.51E-05 | 8.60E-03 | let-7                  | AR,FN1,HK2,IGF1R,ITGB3,MAPK6,PA2G4,STARD13,TLR4              | 1 | 9  |
| ZFYVE9 | peptidase                         | 4.98E-05 | 2.67E-02 | ERN1,SMAD2,ZFYVE9      | ANG,FN1,MMP2,RAC1,TJP1,XIAP                                  | 3 | 6  |
| WAC    | other                             | 5.41E-05 | 1.20E-03 | WAC                    | G6PD,PDK4,PPARG                                              | 1 | 3  |
| SP1    | transcription regulator           | 7.55E-05 | 4.85E-02 | SP1                    | ESR1,FN1,HBEGF,HK2,HMOX1,IGF1R,ITGB3,ZEB2                    | 1 | 8  |
| ZFYVE9 | peptidase                         | 8.01E-05 | 3.66E-02 | SMAD2,ZFYVE9           | FN1,MMP2,RAC1,TJP1,XIAP                                      | 2 | 5  |
| ESRRG  | ligand-dependent nuclear receptor | 9.33E-05 | 2.40E-03 | ESRRG                  | HK2,KLK1,MDH1,PDHA1,PDK4                                     | 1 | 5  |
| ESRRA  | transcription regulator           | 1.10E-04 | 1.34E-02 | CYP19A1,ESRRA          | ESR1,HK2,HMOX1,PNMT,PPARG,RARA                               | 2 | 6  |
| RNF40  | enzyme                            | 1.48E-04 | 5.00E-03 | RNF40                  | G6PD,PDK4,PPARG                                              | 1 | 3  |
| OLR1   | transmembrane receptor            | 2.20E-04 | 2.30E-03 | OLR1                   | MMP1,RARA,RARG                                               | 1 | 3  |
| DDR2   | kinase                            | 2.39E-04 | 2.01E-02 | DDR2,MMP2              | CSF2RB,MMP1,MMP2,PPP2R1A,TJP1                                | 2 | 5  |
| DEF6   | other                             | 3.11E-04 | 4.66E-02 | DEF6                   | FN1,MMP2,ZEB2                                                | 1 | 3  |
| SFN    | other                             | 3.32E-04 | 2.81E-02 | SFN                    | DSG2,F3,PDK4,TJP1                                            | 1 | 4  |
| PTGS1  | enzyme                            | 3.91E-04 | 1.52E-02 | MMP2,MMP9,PTGS1        | CSF2RB,MMP2,PPP2R1A,TJP1                                     | 3 | 4  |
| SRSF1  | other                             | 3.91E-04 | 2.31E-02 | EIF4E,EIF4EBP1,SRSF1   | ESR1,FN1,RAC1,XIAP                                           | 2 | 4  |
| IKBKE  | kinase                            | 4.18E-04 | 3.56E-02 | IKBKE                  | PDHA1,PDK3,PDK4,PGK1,PYGL                                    | 1 | 5  |
| GPI    | enzyme                            | 4.23E-04 | 2.62E-02 | GPI                    | FN1,RAC1,ZEB2                                                | 1 | 3  |
| WT1    | transcription regulator           | 4.26E-04 | 2.84E-02 | WT1                    | BTK,ESR1,HBEGF,IGF1R,ODC1,TRIM21,WARS1                       | 1 | 7  |
| mir-17 | microRNA                          | 5.30E-04 | 2.33E-02 | mir-17                 | AR,ESR1,FAS,NCOA3                                            | 1 | 4  |
| NKX2-1 | transcription regulator           | 5.30E-04 | 2.53E-02 | MMP2,NKX2-1            | CSF2RB,MMP2,PPP2R1A,TJP1                                     | 2 | 4  |

|                                       |                         |          |          |                                    |                                       |   |   |
|---------------------------------------|-------------------------|----------|----------|------------------------------------|---------------------------------------|---|---|
| SIM2                                  | transcription regulator | 5.30E-04 | 2.13E-02 | MMP2,SIM2                          | CSF2RB,MMP2,PPP2R1A,TJP1              | 2 | 4 |
| ESRRA                                 | transcription regulator | 5.66E-04 | 2.51E-02 | ESRRA                              | HK2,HMOX1,PNMT,PPARG,RARA             | 1 | 5 |
| miR-615-3p<br>(miRNAs w/seed CCGAGCC) | mature microRNA         | 5.91E-04 | 5.20E-03 | miR-615-3p (miRNAs w/seed CCGAGCC) | AR,PPARG                              | 1 | 2 |
| PRKAA1                                | kinase                  | 8.21E-04 | 1.88E-02 | PRKAA1                             | EPHA3,FN1,IGF1R,MAGEA4,TJP1           | 1 | 5 |
| PAX3-FOXO1                            | fusion gene/product     | 8.85E-04 | 1.48E-02 | PAX3-FOXO1                         | CLCN5,HMOX1,IGF1R,IMPA2,PPP2R1A,XRCC6 | 1 | 6 |
| SREBF2                                | transcription regulator | 9.05E-04 | 8.80E-03 | SREBF2                             | FABP7,GTF2I,PPARG                     | 1 | 3 |
| ETV5                                  | transcription regulator | 9.09E-04 | 3.82E-02 | ETV5,MMP2                          | CSF2RB,FN1,PPP2R1A,TJP1               | 2 | 4 |
| CSF3                                  | cytokine                | 1.12E-03 | 2.10E-02 | CSF3                               | PPARG,PRKCB,RARA                      | 1 | 3 |
| PRKCB                                 | kinase                  | 1.17E-03 | 3.51E-02 | PRKCB                              | FN1,MMP2                              | 1 | 2 |
| mir-192                               | microRNA                | 1.17E-03 | 1.26E-02 | mir-192                            | IGF1R,ZEB2                            | 1 | 2 |
| DYSF                                  | other                   | 1.17E-03 | 2.63E-02 | DYSF                               | FN1,ITGB3                             | 1 | 2 |
| mir-503                               | microRNA                | 1.17E-03 | 2.15E-02 | mir-503                            | IGF1R,SMURF2                          | 1 | 2 |
| MOAP1                                 | other                   | 1.17E-03 | 9.80E-03 | MOAP1                              | G6PD,HMOX1                            | 1 | 2 |
| SEN2                                  | peptidase               | 1.93E-03 | 1.80E-02 | SEN2                               | HK2,PGK1                              | 1 | 2 |
| KIF26A                                | other                   | 1.93E-03 | 1.06E-02 | KIF26A                             | RAC1,VAV3                             | 1 | 2 |
| c-Src                                 | group                   | 1.93E-03 | 1.64E-02 | c-Src                              | CYP7A1,HMOX1                          | 1 | 2 |
| CDK9                                  | kinase                  | 1.95E-03 | 3.15E-02 | CDK9                               | G6PD,PK4,PPARG                        | 1 | 3 |
| MMP2                                  | peptidase               | 1.95E-03 | 1.37E-02 | MMP2                               | CSF2RB,PPP2R1A,TJP1                   | 1 | 3 |
| EPO                                   | cytokine                | 2.29E-03 | 3.28E-02 | EPO                                | MMP2,PRKCB,TJP1                       | 1 | 3 |
| mir-24                                | microRNA                | 2.87E-03 | 2.68E-02 | mir-24                             | IFNG,PSAP                             | 1 | 2 |
| Mmp                                   | group                   | 3.99E-03 | 2.55E-02 | Mmp                                | FAS,TJP1                              | 1 | 2 |
| NR1D1                                 | ligand-dependent        | 3.99E-03 | 2.12E-02 | NR1D1                              | MDH1,TLR4                             | 1 | 2 |



|              |                         |          |          |              |                            |  |   |   |
|--------------|-------------------------|----------|----------|--------------|----------------------------|--|---|---|
|              | nuclear receptor        |          |          |              |                            |  |   |   |
| BANCR        | other                   | 3.99E-03 | 2.65E-02 | BANCR        | MMP1,MMP2                  |  | 1 | 2 |
| RUNX1        | transcription regulator | 5.71E-03 | 4.75E-02 | RUNX1        | ALOX12,EP300,ITGB3         |  | 1 | 3 |
| TRIM37       | enzyme                  | 5.71E-03 | 3.99E-02 | TRIM37       | CUL1,PEX5,SFN              |  | 1 | 3 |
| GATA3        | transcription regulator | 1.01E-02 | 3.94E-02 | GATA3        | ECHS1,TJP1                 |  | 1 | 2 |
| EGLN         | group                   | 1.12E-02 | 4.19E-02 | EGLN         | HK2,PDK3,PYGL,SH2B2,ZNF292 |  | 1 | 5 |
| LY96         | transmembrane receptor  | 1.41E-02 | 3.06E-02 | LY96         | TLR4                       |  | 1 | 1 |
| HLTF         | transcription regulator | 1.41E-02 | 3.47E-02 | HLTF         | HBB                        |  | 1 | 1 |
| PKNOX1       | transcription regulator | 1.41E-02 | 3.08E-02 | PKNOX1       | FABP7                      |  | 1 | 1 |
| PROM1        | other                   | 1.41E-02 | 2.70E-02 | PROM1        | DSG2                       |  | 1 | 1 |
| SMG6         | enzyme                  | 1.41E-02 | 3.47E-02 | SMG6         | HBB                        |  | 1 | 1 |
| PSMC3IP      | transcription regulator | 1.41E-02 | 2.87E-02 | PSMC3IP      | CYP17A1                    |  | 1 | 1 |
| S100A3       | transporter             | 1.41E-02 | 2.86E-02 | S100A3       | RARA                       |  | 1 | 1 |
| Dgk          | group                   | 1.41E-02 | 2.87E-02 | Dgk          | CYP17A1                    |  | 1 | 1 |
| ALDH1A3      | enzyme                  | 1.41E-02 | 2.44E-02 | ALDH1A3      | RRM1                       |  | 1 | 1 |
| BLVRA        | enzyme                  | 1.41E-02 | 2.22E-02 | BLVRA        | CERT1                      |  | 1 | 1 |
| CTD_2245E153 | other                   | 1.41E-02 | 2.51E-02 | CTD_2245E153 | PC                         |  | 1 | 1 |
| GFER         | enzyme                  | 1.41E-02 | 2.61E-02 | GFER         | NR1I3                      |  | 1 | 1 |
| PABIR1       | other                   | 1.41E-02 | 2.57E-02 | PABIR1       | WEE1                       |  | 1 | 1 |
| NUP98        | transporter             | 2.81E-02 | 2.73E-02 | NUP98        | YWHAH                      |  | 1 | 1 |
| COMMD1       | transporter             | 2.81E-02 | 4.97E-02 | COMMD1       | ATP7B                      |  | 1 | 1 |
| mir-346      | microRNA                | 2.81E-02 | 4.92E-02 | mir-346      | BTK                        |  | 1 | 1 |
| CDC14A       | phosphatase             | 2.81E-02 | 2.57E-02 | CDC14A       | WEE1                       |  | 1 | 1 |
| RAMAC        | other                   | 2.81E-02 | 2.14E-02 | RAMAC        | RUVBL1                     |  | 1 | 1 |

|        |        |          |          |        |      |   |   |
|--------|--------|----------|----------|--------|------|---|---|
| MAP3K5 | kinase | 4.18E-02 | 2.39E-02 | MAP3K5 | MSH2 | 1 | 1 |
|--------|--------|----------|----------|--------|------|---|---|

**Supplementary Table S6: Toxicity analysis by IPA for solasonine.** The toxicity analysis by IPA was performed to predict the toxicity of solasonine, by importing the dataset of potential targets of solasonine. The potential toxicity list was obtained and sorted by decreasing of  $-\log(p\text{-value})$ ,  $p\text{-value} \leq 0.05$ .

| Ingenuity Toxicity Lists                          | $-\log(p\text{-value})$ | Ratio | Molecules                                                                                                                                   |
|---------------------------------------------------|-------------------------|-------|---------------------------------------------------------------------------------------------------------------------------------------------|
| Hepatic Fibrosis                                  | 7.80                    | 0.06  | ALB,ATP7B,B2M,CYP2E1,CYP7A1,ESR1,F2,FN1,GRHPR,IFNG,IMPDH1,MMP1,MMP2,NMT1,NOTCH1,PAH,PPARG,PTPRE,SERPINA5,THBS2,TLR4                         |
| Liver Necrosis/Cell Death                         | 7.00                    | 0.06  | AR,ARF6,ATP7B,CYP2E1,CYP7A1,ESR1,F3,FAS,GRK2,HBEGF,HK2,HMOX1,IFNG,IFNGR1,ITGB3,NR1I3,STK4,TLR4,XIAP                                         |
| Renal Necrosis/Cell Death                         | 7.00                    | 0.04  | ALB,AR,ATXN3,ERBB4,F2,F3,FAS,GRK2,HBEGF,HK2,HMOX1,IFNG,IGF1R,NDUFAB1,NF2,PEX5,PPARG,PRKCB,PTK2B,RAC1,SLK,STK4,TLR4,TNFAIP8L2,XIAP,YWHAQ,YY1 |
| Fatty Acid Metabolism                             | 7.00                    | 0.11  | ACADSB,ACADVL,ACAT2,ADH1C,ADH7,CYP2E1,ECHS1,ECI2,HADH,HSD17B10,HSD17B4                                                                      |
| Cardiac Necrosis/Cell Death                       | 6.48                    | 0.06  | AR,DPP4,DSG2,FAS,HK2,HMOX1,IFNG,MMP2,MYBPC3,PRKCB,PTK2B,RAC1,S100A6,STK4,THBS2,TLR4,VEGFB,XIAP                                              |
| Cell Cycle: G2/M DNA Damage Checkpoint Regulation | 6.37                    | 0.16  | BTRC,CUL1,EP300,SFN,SKP1,WEE1,YWHAH,YWHAQ                                                                                                   |
| Cardiac Fibrosis                                  | 5.67                    | 0.06  | AR,DSG2,F3,FN1,HBEGF,HMOX1,IFNG,IGF1R,MYBPC3,PRKCB,STK4,THBS2,TLR4,UTRN,VAV3,VEGFB                                                          |
| Cardiac Hypertrophy                               | 4.80                    | 0.04  | EP300,ESR1,FN1,HBB,HBEGF,HCK,ITGB3,MMP1,MMP2,MYBPC3,NOTCH1,PRKCB,RAC1,S100A6,TLR4,TTR,VAV3,VEGFB                                            |
| Increases Liver Damage                            | 4.38                    | 0.09  | CYP2E1,CYP7A1,F2,FAS,IFNG,IFNGR1,IGF1R,TLR4                                                                                                 |
| Liver Proliferation                               | 3.63                    | 0.05  | CSF2RB,F2,FAS,HBEGF,IFNG,IFNGR1,IGF1R,ITGB3,NR1I3,ODC1,PPARG,RARA                                                                           |
| LPS/IL-1 Mediated Inhibition of RXR Function      | 3.59                    | 0.05  | CYP2E1,CYP2R1,CYP7A1,FABP3,FABP7,GSTT2/GSTT2B,HMGCS1,NR1I3,RARA,SULT1A1,TLR4                                                                |
| Increases Damage of Mitochondria                  | 3.55                    | 0.30  | AR,FAS,IFNG                                                                                                                                 |
| RAR Activation                                    | 3.47                    | 0.05  | ADH1C,ADH7,CSF2RB,EP300,MMP1,PRKCB,RAC1,RARA,RARG,RBP5                                                                                      |
| Xenobiotic Metabolism Signaling                   | 3.45                    | 0.04  | ADH1C,ADH7,CAMK4,CYP2E1,EP300,GSTT2/GSTT2B,HMOX1,HSP90AB1,MAP3K3,NR1I3,PPP2R1A,PRKCB,SULT1A1                                                |
| Increases Renal Damage                            | 3.40                    | 0.07  | B2M,FCGR2A,GC,HCK,POU2F1,RAC1,TLR4                                                                                                          |
| Increases Cardiac Proliferation                   | 3.10                    | 0.08  | ERBB4,HBEGF,HMOX1,NAE1,NOTCH1,RARA                                                                                                          |
| Increases Glomerular Injury                       | 3.10                    | 0.06  | B2M,ESR1,FCGR2A,HBEGF,IFNG,IFNGR1,SLK,SMURF2                                                                                                |
| Aryl Hydrocarbon Receptor Signaling               | 2.98                    | 0.05  | EP300,ESR1,FAS,GSTT2/GSTT2B,HSP90AB1,NCOA3,RARA,RARG                                                                                        |
| LXR/RXR Activation                                | 2.81                    | 0.06  | ALB,CYP7A1,ECHS1,GC,HADH,TLR4,TTR                                                                                                           |
| Increases Liver Hepatitis                         | 2.81                    | 0.07  | ESR1,FAS,IFNG,IFNGR1,TLR4,XIAP                                                                                                              |

|                                                                              |      |      |                                                       |
|------------------------------------------------------------------------------|------|------|-------------------------------------------------------|
| Cell Cycle: G1/S Checkpoint Regulation                                       | 2.65 | 0.07 | BTRC,CUL1,HDAC7,PA2G4,SKP1                            |
| Renal Safety Biomarker Panel (PSTC)                                          | 2.57 | 0.33 | ALB,B2M                                               |
| VDR/RXR Activation                                                           | 2.39 | 0.06 | EP300,IFNG,NCOA3,PRKCB,YY1                            |
| Increases Transmembrane Potential of Mitochondria and Mitochondrial Membrane | 2.32 | 0.08 | BCR,FAS,PPARG,RAC1                                    |
| Increases Renal Proliferation                                                | 2.27 | 0.05 | CAMK4,CHKA,CSTF2,ESR1,NDUFAB1,PPP2R1A,TLR4            |
| FXR/RXR Activation                                                           | 2.12 | 0.05 | ALB,CYP7A1,GC,PPARG,RARA,TTR                          |
| Mechanism of Gene Regulation by Peroxisome Proliferators via PPAR $\alpha$   | 2.03 | 0.05 | EP300,HSD17B4,HSP90AB1,PPARG,PRKCB                    |
| Increases Renal Nephritis                                                    | 2.01 | 0.07 | FCGR2A,HBEGF,IFNG,IFNGR1                              |
| Hepatic Stellate Cell Activation                                             | 1.92 | 0.09 | CYP2E1,IFNG,TLR4                                      |
| Cytochrome P450 Panel - Substrate is a Sterol (Human)                        | 1.82 | 0.14 | CYP17A1,CYP7A1                                        |
| Cytochrome P450 Panel - Substrate is a Sterol (Mouse)                        | 1.82 | 0.14 | CYP17A1,CYP7A1                                        |
| Cytochrome P450 Panel - Substrate is a Sterol (Rat)                          | 1.82 | 0.14 | CYP17A1,CYP7A1                                        |
| Increases Cardiac Dysfunction                                                | 1.77 | 0.06 | EP300,FAS,PRKCB,STK4                                  |
| Pro-Apoptosis                                                                | 1.71 | 0.07 | DAPK2,DFFA,FAS                                        |
| Cholesterol Biosynthesis                                                     | 1.71 | 0.13 | ACAT2,HMGCS1                                          |
| NRF2-mediated Oxidative Stress Response                                      | 1.57 | 0.03 | CYP2E1,CYP2R1,EP300,GSTT2/GSTT2B,HMOX1,HSP90AB1,PRKCB |
| TR/RXR Activation                                                            | 1.55 | 0.05 | CAMK4,CYP7A1,EP300,NCOA3                              |
| Genes associated with Chronic Allograft Nephropathy (Human)                  | 1.48 | 0.10 | FN1,MMP2                                              |
| Increases Liver Steatosis                                                    | 1.47 | 0.04 | ATP7B,CYP2E1,HMOX1,NR1I3,PPARG                        |
| Increases Liver Hyperplasia/Hyperproliferation                               | 1.43 | 0.04 | FAS,IGF1R,NR1I3,ODC1,S100A6                           |

|                                                                              |      |      |                                   |
|------------------------------------------------------------------------------|------|------|-----------------------------------|
| Decreases Transmembrane Potential of Mitochondria and Mitochondrial Membrane | 1.43 | 0.04 | B2M,DFFA,FAS,IFNG,MUC1            |
| Hepatic Cholestasis                                                          | 1.39 | 0.03 | CYP7A1,ESR1,IFNG,PRKCB,RARA,TLR4  |
| Reversible Glomerulonephritis Biomarker Panel (Rat)                          | 1.37 | 0.08 | HBB,KLK1                          |
| Protection from Hypoxia-induced Renal Ischemic Injury (Rat)                  | 1.27 | 0.25 | HMOX1                             |
| CAR/RXR Activation                                                           | 1.23 | 0.07 | NR1I3,SULT1A1                     |
| Hypoxia-Inducible Factor Signaling                                           | 1.16 | 0.04 | EP300,HSP90AB1,PRKCB              |
| Decreases Depolarization of Mitochondria and Mitochondrial Membrane          | 1.13 | 0.06 | CD74,FAS                          |
| Cytochrome P450 Panel - Substrate is a Vitamin (Human)                       | 1.10 | 0.17 | CYP2R1                            |
| Cytochrome P450 Panel - Substrate is a Vitamin (Mouse)                       | 1.04 | 0.14 | CYP2R1                            |
| Cytochrome P450 Panel - Substrate is a Vitamin (Rat)                         | 1.04 | 0.14 | CYP2R1                            |
| PPAR $\alpha$ /RXR $\alpha$ Activation                                       | 0.99 | 0.03 | ACVR2B,EP300,HSP90AB1,NCOA3,PRKCB |
| Negative Acute Phase Response Proteins                                       | 0.98 | 0.13 | ALB                               |
| Primary Glomerulonephritis Biomarker Panel (Human)                           | 0.85 | 0.09 | HBEGF                             |
| Cytochrome P450 Panel - Substrate is a Xenobiotic (Mouse)                    | 0.82 | 0.08 | CYP2E1                            |
| TGF- $\beta$ Signaling                                                       | 0.81 | 0.03 | ACVR2B,EP300,SMURF2               |
| p53 Signaling                                                                | 0.81 | 0.03 | EP300,FAS,SFN                     |
| Cytochrome P450 Panel - Substrate is a Xenobiotic (Rat)                      | 0.79 | 0.08 | CYP2E1                            |
| Decreases Respiration of Mitochondria                                        | 0.79 | 0.08 | IFNG                              |
| Acute Renal Failure Panel (Rat)                                              | 0.76 | 0.04 | HMOX1,SFN                         |

|                                                            |      |      |                                          |
|------------------------------------------------------------|------|------|------------------------------------------|
| Swelling of Mitochondria                                   | 0.76 | 0.07 | FAS                                      |
| Recovery from Ischemic Acute Renal Failure (Rat)           | 0.76 | 0.07 | KLK1                                     |
| Long-term Renal Injury Anti-oxidative Response Panel (Rat) | 0.73 | 0.07 | HMOX1                                    |
| Renal Glomerulus Panel (Human)                             | 0.68 | 0.06 | TJP1                                     |
| PXR/RXR Activation                                         | 0.67 | 0.03 | CYP7A1,NR1I3                             |
| Cytochrome P450 Panel - Substrate is a Xenobiotic (Human)  | 0.66 | 0.06 | CYP2E1                                   |
| Glutathione Depletion - Phase II Reactions                 | 0.64 | 0.05 | GSTT2/GSTT2B                             |
| Increases Bradycardia                                      | 0.62 | 0.05 | RAC1                                     |
| NF-κB Signaling                                            | 0.61 | 0.02 | BTRC,EP300,IGF1R,MAP3K3,MAPK6,PRKCB,TLR4 |
| Positive Acute Phase Response Proteins                     | 0.47 | 0.03 | HMOX1                                    |
| Anti-Apoptosis                                             | 0.45 | 0.03 | XIAP                                     |
| Mitochondrial Dysfunction                                  | 0.41 | 0.02 | HSD17B10,NDUFAB1,PDHA1                   |
| Oxidative Stress                                           | 0.27 | 0.02 | CYP2E1                                   |

**Supplementary Table S7: Potential therapeutic targets of solasonine for BC.** By integrating the potential targets regulated by solasonine, and the genes associated with BC searched in databases of GeneCards, OMIM, TTD, PharmGKB, and DrugBank, a total of 191 genes overlapped were identified, which could be considered as the potential therapeutic targets of solasonine for BC.

| Num | Symbol  | Gene Name                                                      | Source    |      |     |          |          |
|-----|---------|----------------------------------------------------------------|-----------|------|-----|----------|----------|
|     |         |                                                                | GeneCards | OMIM | TTD | PharmGKB | DrugBank |
| 1   | CSDE1   | Cold shock domain-containing protein E1                        | √         |      |     |          |          |
| 2   | RGS6    | Regulator of G-protein signaling 6                             | √         |      |     |          |          |
| 3   | POT1    | Protection of telomeres protein 1                              | √         |      |     |          |          |
| 4   | F2      | Prothrombin                                                    | √         |      |     |          |          |
| 5   | RARG    | Retinoic acid receptor gamma                                   | √         |      |     |          |          |
| 6   | NF2     | Merlin                                                         | √         |      |     |          |          |
| 7   | CUL1    | Cullin-1                                                       | √         |      |     |          |          |
| 8   | HK2     | Hexokinase-2                                                   | √         |      |     |          |          |
| 9   | EP300   | Histone acetyltransferase p300                                 | √         | √    |     |          |          |
| 10  | RRM1    | Ribonucleoside-diphosphate reductase large subunit             | √         |      |     |          | √        |
| 11  | XRCC6   | ATP-dependent DNA helicase 2 subunit 1                         | √         |      |     |          |          |
| 12  | HSD17B4 | Peroxisomal multifunctional enzyme type 2                      | √         |      |     |          |          |
| 13  | MMP2    | 72 kDa type IV collagenase                                     | √         |      |     |          |          |
| 14  | ACADVL  | Very long-chain specific acyl-CoA dehydrogenase, mitochondrial | √         |      |     |          |          |
| 15  | HBEGF   | Proheparin-binding EGF-like growth factor                      | √         |      |     |          |          |
| 16  | HMGCS1  | Hydroxymethylglutaryl-CoA synthase, cytoplasmic                | √         |      |     |          |          |
| 17  | AR      | Androgen receptor                                              | √         | √    | √   |          |          |
| 18  | HMOX1   | Heme oxygenase 1                                               | √         |      |     |          |          |
| 19  | VAV3    | Guanine nucleotide exchange factor VAV3                        | √         |      |     |          |          |
| 20  | ZEB2    | Zinc finger E-box-binding homeobox 2                           | √         |      |     |          |          |
| 21  | NME3    | Nucleoside diphosphate kinase 3                                | √         |      |     |          |          |
| 22  | BTK     | Tyrosine-protein kinase BTK                                    | √         |      |     |          |          |
| 23  | MUC1    | Mucin-1                                                        | √         |      |     |          |          |
| 24  | MARK1   | Serine/threonine-protein kinase MARK1                          | √         |      |     |          |          |
| 25  | VEGFB   | Vascular endothelial growth factor B                           | √         |      |     |          |          |
| 26  | FABP3   | Fatty acid-binding protein, heart                              | √         |      |     |          |          |
| 27  | KLK1    | Kallikrein-1                                                   | √         |      |     |          |          |
| 28  | RND1    | Rho-related GTP-binding protein Rho6                           | √         |      |     |          |          |

|    |          |                                                                                   |   |   |
|----|----------|-----------------------------------------------------------------------------------|---|---|
| 29 | HBB      | Hemoglobin subunit beta                                                           | √ |   |
| 30 | MAP3K3   | Mitogen-activated protein kinase kinase kinase 3                                  | √ |   |
| 31 | DFFA     | DNA fragmentation factor subunit alpha                                            | √ |   |
| 32 | RBP5     | Retinol-binding protein 5                                                         | √ |   |
| 33 | ESR1     | Estrogen receptor                                                                 | √ | √ |
| 34 | RAC1     | Ras-related C3 botulinum toxin substrate 1                                        | √ |   |
| 35 | PTPRF    | Receptor-type tyrosine-protein phosphatase F                                      | √ |   |
| 36 | HCK      | Tyrosine-protein kinase HCK                                                       | √ |   |
| 37 | FCGR2A   | Low affinity immunoglobulin gamma Fc region receptor II-a                         | √ |   |
| 38 | EPHA3    | Ephrin type-A receptor 3                                                          | √ |   |
| 39 | PTK2B    | Protein tyrosine kinase 2 beta                                                    | √ |   |
| 40 | TRIM21   | 52 kDa Ro protein                                                                 | √ |   |
| 41 | DTYMK    | Thymidylate kinase                                                                | √ |   |
| 42 | PPP2R1A  | Serine/threonine-protein phosphatase 2A 65 kDa regulatory subunit A alpha isoform | √ |   |
| 43 | MTAP     | S-methyl-5-thioadenosine phosphorylase                                            | √ |   |
| 44 | IGF1R    | Insulin-like growth factor 1 receptor                                             | √ |   |
| 45 | FLNB     | Filamin-B                                                                         | √ |   |
| 46 | HDAC7    | Histone deacetylase 7                                                             | √ |   |
| 47 | ALOX12   | Arachidonate 12-lipoxygenase, 12S-type                                            | √ |   |
| 48 | WWP1     | NEDD4-like E3 ubiquitin-protein ligase WWP1                                       | √ |   |
| 49 | HSP90AB1 | Heat shock protein HSP 90-beta                                                    | √ |   |
| 50 | KIF11    | Kinesin-like protein KIF11                                                        | √ |   |
| 51 | GC       | Vitamin D-binding protein                                                         | √ |   |
| 52 | MATK     | Megakaryocyte-associated tyrosine-protein kinase                                  | √ |   |
| 53 | DCXR     | L-xylulose reductase                                                              | √ |   |
| 54 | F3       | Tissue factor                                                                     | √ |   |
| 55 | ACVR2B   | Activin receptor type-2B                                                          | √ |   |
| 56 | CLK1     | Dual specificity protein kinase CLK1                                              | √ |   |
| 57 | SEN2     | Sentrin-specific protease 2                                                       | √ |   |
| 58 | MSN      | Moesin                                                                            | √ |   |
| 59 | SF3B6    | Pre-mRNA branch site protein p14                                                  | √ |   |
| 60 | RAB26    | Ras-related protein Rab-26                                                        | √ |   |
| 61 | BMP1     | Bone morphogenetic protein 1                                                      | √ |   |



|    |         |                                                                      |   |   |   |
|----|---------|----------------------------------------------------------------------|---|---|---|
| 62 | PAPSS1  | Bifunctional 3-phosphoadenosine 5-phosphosulfate synthetase 1        | √ |   |   |
| 63 | PYGL    | Glycogen phosphorylase, liver form                                   | √ |   |   |
| 64 | MSH2    | DNA mismatch repair protein Msh2                                     | √ | √ | √ |
| 65 | POU2F1  | POU domain, class 2, transcription factor 1                          | √ |   |   |
| 66 | GTF2I   | General transcription factor II-I                                    | √ |   |   |
| 67 | SKP1    | S-phase kinase-associated protein 1                                  | √ |   |   |
| 68 | DHPS    | Deoxyhypusine synthase                                               | √ |   |   |
| 69 | NCOA3   | Nuclear receptor coactivator 3                                       | √ | √ |   |
| 70 | TTR     | Transthyretin                                                        | √ |   |   |
| 71 | CSNK1G2 | Casein kinase I isoform gamma-2                                      | √ |   |   |
| 72 | PDK2    | [Pyruvate dehydrogenase [lipoamide]] kinase isozyme 2, mitochondrial | √ |   |   |
| 73 | ADH1C   | Alcohol dehydrogenase 1C                                             | √ |   |   |
| 74 | ITPK1   | Inositol-tetrakisphosphate 1-kinase                                  | √ |   |   |
| 75 | BPI     | Bactericidal permeability-increasing protein                         | √ |   |   |
| 76 | HPD     | 4-hydroxyphenylpyruvate dioxygenase                                  | √ |   |   |
| 77 | PAH     | Phenylalanine-4-hydroxylase                                          | √ |   |   |
| 78 | B2M     | Beta-2-microglobulin                                                 | √ |   |   |
| 79 | SULT1A1 | Sulfotransferase 1A1                                                 | √ |   |   |
| 80 | MAGEA4  | Melanoma-associated antigen 4                                        | √ |   | √ |
| 81 | NSUN5   | Putative methyltransferase NSUN5                                     | √ |   |   |
| 82 | LRBA    | Lipopolysaccharide-responsive and beige-like anchor protein          | √ |   |   |
| 83 | SART3   | Squamous cell carcinoma antigen recognized by T-cells 3              | √ |   | √ |
| 84 | BCR     | Breakpoint cluster region protein                                    | √ |   |   |
| 85 | PSAP    | Proactivator polypeptide                                             | √ |   |   |
| 86 | YWHAQ   | 14-3-3 protein theta                                                 | √ |   |   |
| 87 | SMG5    | Protein SMG5                                                         | √ |   |   |
| 88 | WEE1    | Wee1-like protein kinase                                             | √ |   |   |
| 89 | TLR4    | Toll-like receptor 4                                                 | √ |   |   |
| 90 | CYP7A1  | Cytochrome P450 7A1                                                  | √ |   |   |
| 91 | IFNGR1  | Interferon-gamma receptor alpha chain                                | √ |   |   |
| 92 | FAS     | Tumor necrosis factor receptor superfamily member 6                  | √ | √ |   |
| 93 | PEX5    | Peroxisomal targeting signal 1 receptor                              | √ |   |   |
| 94 | PA2G4   | Proliferation-associated protein 2G4                                 | √ |   |   |

|     |           |                                                                              |   |   |
|-----|-----------|------------------------------------------------------------------------------|---|---|
| 95  | EXOSC9    | Exosome complex exonuclease RRP45                                            | √ |   |
| 96  | ACACB     | Acetyl-CoA carboxylase 2                                                     |   | √ |
| 97  | ATXN3     | Ataxin-3                                                                     | √ |   |
| 98  | HNRNPA2B1 | Heterogeneous nuclear ribonucleoproteins A2/B1                               | √ |   |
| 99  | ERBB4     | Receptor tyrosine-protein kinase erbB-4                                      | √ |   |
| 100 | ITGB3     | Integrin beta-3                                                              | √ |   |
| 101 | GAD2      | Glutamate decarboxylase 2                                                    | √ |   |
| 102 | PCYT2     | Ethanolamine-phosphate cytidylyltransferase                                  | √ |   |
| 103 | FAP       | Seprase                                                                      | √ |   |
| 104 | PARN      | Poly(A)-specific ribonuclease PARN                                           | √ |   |
| 105 | RPA3      | Replication protein A 14 kDa subunit                                         | √ |   |
| 106 | ANXA6     | Annexin A6                                                                   | √ |   |
| 107 | MAGI2     | Membrane-associated guanylate kinase, WW and PDZ domain-containing protein 2 | √ |   |
| 108 | HLA-DRB1  | HLA class II histocompatibility antigen, DRB1-1 beta chain                   | √ |   |
| 109 | NFATC1    | Nuclear factor of activated T-cells, cytoplasmic 1                           | √ |   |
| 110 | ALK       | ALK tyrosine kinase receptor                                                 | √ |   |
| 111 | CYP2E1    | Cytochrome P450 2E1                                                          | √ |   |
| 112 | PPARG     | Peroxisome proliferator-activated receptor gamma                             | √ |   |
| 113 | ATP7B     | Copper-transporting ATPase 2                                                 | √ | √ |
| 114 | PGK1      | Phosphoglycerate kinase 1                                                    | √ |   |
| 115 | MMP1      | Interstitial collagenase                                                     | √ |   |
| 116 | DAPK2     | Death-associated protein kinase 2                                            | √ |   |
| 117 | S100A6    | Protein S100-A6                                                              | √ |   |
| 118 | NOTCH1    | Neurogenic locus notch homolog protein 1                                     | √ |   |
| 119 | SERPINA5  | Plasma serine protease inhibitor                                             | √ |   |
| 120 | NAE1      | NEDD8-activating enzyme E1 regulatory subunit                                | √ |   |
| 121 | ZIC3      | Zinc finger protein ZIC 3                                                    | √ |   |
| 122 | ODC1      | Ornithine decarboxylase                                                      | √ |   |
| 123 | RARA      | Retinoic acid receptor alpha                                                 | √ |   |
| 124 | PNMT      | Phenylethanolamine N-methyltransferase                                       | √ |   |
| 125 | TJP1      | Tight junction protein ZO-1                                                  | √ |   |
| 126 | AOC3      | Membrane primary amine oxidase                                               | √ |   |
| 127 | CSTF2     | Cleavage stimulation factor 64 kDa subunit                                   | √ |   |

|     |           |                                                                     |   |   |
|-----|-----------|---------------------------------------------------------------------|---|---|
| 128 | YY1       | Transcriptional repressor protein YY1                               | ✓ |   |
| 129 | IFNG      | Interferon gamma                                                    | ✓ |   |
| 130 | ANG       | Angiogenin                                                          | ✓ |   |
| 131 | ACY1      | Aminoacylase-1                                                      | ✓ |   |
| 132 | SNX1      | Sorting nexin-1                                                     | ✓ |   |
| 133 | CTCF      | Transcriptional repressor CTCF                                      | ✓ |   |
| 134 | TAF13     | Transcription initiation factor TFIID subunit 13                    | ✓ |   |
| 135 | GGPS1     | Geranylgeranyl pyrophosphate synthetase                             | ✓ |   |
| 136 | BTRC      | F-box/WD repeat-containing protein 1A                               | ✓ |   |
| 137 | TNFAIP8L2 | Tumor necrosis factor, alpha-induced protein 8-like protein 2       | ✓ | ✓ |
| 138 | NBEA      | Neurobeachin                                                        | ✓ |   |
| 139 | MYBPC1    | Myosin-binding protein C, slow-type                                 | ✓ |   |
| 140 | STK4      | Serine/threonine-protein kinase 4                                   | ✓ |   |
| 141 | ECI2      | Peroxisomal 3,2-trans-enoyl-CoA isomerase                           | ✓ | ✓ |
| 142 | DPP4      | Dipeptidyl peptidase 4                                              | ✓ |   |
| 143 | ARHGEF1   | Rho guanine nucleotide exchange factor 1                            | ✓ |   |
| 144 | APEX1     | DNA-(apurinic or apyrimidinic site) lyase                           | ✓ |   |
| 145 | B3GAT3    | Galactosylgalactosylxylosylprotein 3-beta-glucuronosyltransferase 3 | ✓ |   |
| 146 | ARF6      | ADP-ribosylation factor 6                                           | ✓ |   |
| 147 | XIAP      | Baculoviral IAP repeat-containing protein 4                         | ✓ |   |
| 148 | ECHS1     | Enoyl-CoA hydratase, mitochondrial                                  | ✓ |   |
| 149 | ALB       | Serum albumin                                                       | ✓ | ✓ |
| 150 | PRKCB     | Protein kinase C beta type                                          | ✓ |   |
| 151 | FHIT      | Bis(5-adenosyl)-triphosphatase                                      | ✓ |   |
| 152 | GART      | Trifunctional purine biosynthetic protein adenosine-3               | ✓ |   |
| 153 | C1R       | Complement C1r subcomponent                                         | ✓ |   |
| 154 | YWHAH     | 14-3-3 protein eta                                                  | ✓ |   |
| 155 | OXSR1     | Serine/threonine-protein kinase OSR1                                | ✓ |   |
| 156 | RTN4IP1   | Reticulon-4-interacting protein 1, mitochondrial                    | ✓ |   |
| 157 | HMGB3     | High mobility group protein B3                                      | ✓ |   |
| 158 | OAT       | Ornithine aminotransferase, mitochondrial                           | ✓ |   |
| 159 | SFN       | 14-3-3 protein sigma                                                | ✓ |   |
| 160 | STARD13   | StAR-related lipid transfer protein 13                              | ✓ |   |

|     |          |                                                                      |   |
|-----|----------|----------------------------------------------------------------------|---|
| 161 | G6PD     | Glucose-6-phosphate 1-dehydrogenase                                  | √ |
| 162 | DSG2     | Desmoglein-2                                                         | √ |
| 163 | THBS2    | Thrombospondin-2                                                     | √ |
| 164 | DCTD     | Deoxycytidylate deaminase                                            | √ |
| 165 | PDK4     | [Pyruvate dehydrogenase [lipoamide]] kinase isozyme 4, mitochondrial | √ |
| 166 | FN1      | Fibronectin                                                          | √ |
| 167 | CHKA     | Choline kinase alpha                                                 | √ |
| 168 | SMTN     | Smoothelin                                                           | √ |
| 169 | VPS26A   | Vacuolar protein sorting-associated protein 26A                      | √ |
| 170 | SEMA4D   | Semaphorin-4D                                                        | √ |
| 171 | CLCN5    | Chloride channel protein 5                                           | √ |
| 172 | GRHPR    | Glyoxylate reductase/hydroxypyruvate reductase                       | √ |
| 173 | NMT1     | Glycylpeptide N-tetradecanoyltransferase 1                           | √ |
| 174 | NDC80    | Kinetochore protein NDC80 homolog                                    | √ |
| 175 | PARP3    | Poly [ADP-ribose] polymerase 3                                       | √ |
| 176 | RBM39    | RNA-binding protein 39                                               | √ |
| 177 | CD74     | HLA class II histocompatibility antigen gamma chain                  | √ |
| 178 | CYP17A1  | Steroid 17-alpha-hydroxylase                                         | √ |
| 179 | SLC5A1   | Sodium/glucose cotransporter 1                                       | √ |
| 180 | DHCR24   | Delta(24)-sterol reductase                                           | √ |
| 181 | AMY2A    | Pancreatic alpha-amylase                                             | √ |
| 182 | IL2      | Interleukin-2                                                        | √ |
| 183 | NPC1L1   | NPC1-like intracellular cholesterol transporter 1                    | √ |
| 184 | ABCC4    | Multidrug resistance-associated protein 4                            | √ |
| 185 | SERPINA6 | Corticosteroid-binding globulin                                      | √ |
| 186 | GLI1     | Zinc finger protein GLI1                                             | √ |
| 187 | POLA1    | DNA polymerase alpha catalytic subunit                               | √ |
| 188 | SRD5A2   | 3-oxo-5-alpha-steroid 4-dehydrogenase 2                              | √ |
| 189 | NR1H3    | Oxysterols receptor LXR-alpha                                        | √ |
| 190 | SHH      | Sonic hedgehog protein                                               | √ |
| 191 | SHBG     | Sex hormone-binding globulin                                         | √ |

**Note:** BC, Bladder Cancer; OMIM, Online Mendelian Inheritance in Man database; TTD, Therapeutic Target Database; PharmGKB, Pharmacogenomics Knowledgebase Database.

**Supplementary Table S8: KEGG pathway and GO terms analyses for genes of solasonine targeting BC.** Through KEGG enrichment of identified genes related to solasonine targeting BC, 3 remarkably enriched pathways were obtained (adj.P-value  $\leq 0.05$ ); through GO terms analysis, 692, 16 and 48 remarkably enriched biological process (BP), cellular component (CC) and molecular function (MF) terms were obtained respectively (adj.P-value  $\leq 0.05$ ).

| Group | ID         | Description                                   | GeneRatio | BgRatio   | p-value  | p.adjust | q-value  | geneID                                                                                                                    |
|-------|------------|-----------------------------------------------|-----------|-----------|----------|----------|----------|---------------------------------------------------------------------------------------------------------------------------|
| KEGG  | hsa05205   | Proteoglycans in cancer                       | 16/155    | 205/8093  | 1.71E-06 | 4.81E-04 | 4.04E-04 | MMP2/HBEGF/VAV3/ESR1/RAC1/IGF1R/FLNB/MSN/TLR4/FAS/ERBB4/ITGB3/ARHGEF1/PRKCB/FN1/SHH                                       |
| KEGG  | hsa04066   | HIF-1 signaling pathway                       | 9/155     | 109/8093  | 2.29E-04 | 2.66E-02 | 2.23E-02 | HK2/EP300/HMOX1/IGF1R/TLR4/IFNGR1/PGK1/IFNG/PRKCB                                                                         |
| KEGG  | hsa05135   | Yersinia infection                            | 10/155    | 137/8093  | 2.84E-04 | 2.66E-02 | 2.23E-02 | VAV3/RAC1/FCGR2A/PTK2B/TLR4/NFATC1/ARHGEF1/ARF6/FN1/IL2                                                                   |
| BP    | GO:0008202 | steroid metabolic process                     | 19/189    | 329/18862 | 9.16E-10 | 3.43E-06 | 2.35E-06 | HSD17B4/ACADVL/HMGCS1/ESR1/GC/SULT1A1/CYP7A1/ACACB/CYP2E1/IFNG/GGPS1/YWHAH/G6PD/CYP17A1/DHCR24/NPC1L1/SERPINA6/SRD5A2/SHH |
| BP    | GO:0035265 | organ growth                                  | 13/189    | 168/18862 | 1.28E-08 | 1.60E-05 | 1.10E-05 | RARG/AR/ESR1/PSAP/ACACB/ERBB4/ANXA6/NOTCH1/YY1/STK4/G6PD/GLI1/SHH                                                         |
| BP    | GO:0048608 | reproductive structure development            | 18/189    | 407/18862 | 2.72E-08 | 1.89E-05 | 1.29E-05 | CSDE1/RARG/RRM1/HSD17B4/HMGCS1/AR/ESR1/HSP90AB1/SEN2/MSH2/PSAP/PPARG/NOTCH1/SERPINA5/ANG/STK4/GLI1/SRD5A2/SHH             |
| BP    | GO:0061458 | reproductive system development               | 19/189    | 408/18862 | 3.06E-08 | 1.89E-05 | 1.29E-05 | CSDE1/RARG/RRM1/HSD17B4/HMGCS1/AR/ESR1/HSP90AB1/SEN2/MSH2/PSAP/PPARG/NOTCH1/SERPINA5/ANG/STK4/GLI1/SRD5A2/SHH             |
| BP    | GO:0018108 | peptidyl-tyrosine phosphorylation             | 18/189    | 369/18862 | 3.56E-08 | 1.89E-05 | 1.29E-05 | NF2/HBEGF/BTK/HCK/EPHA3/PTK2B/PPP2R1A/IGF1R/MATK/CLK1/WEI1/ERBB4/ITGB3/ALK/IFNG/SEMA4D/CD74/IL2                           |
| BP    | GO:1901617 | organic hydroxy compound biosynthetic process | 15/189    | 251/18862 | 3.71E-08 | 1.89E-05 | 1.29E-05 | HSD17B4/HMGCS1/ZEB2/PTK2B/ALOX12/PAH/CYP7A1/ACACB/PNMT/IFNG/GGPS1/G6PD/DHCR24/NPC1L1/SRD5A2                               |
| BP    | GO:0018212 | peptidyl-tyrosine modification                | 18/189    | 372/18862 | 4.03E-08 | 1.89E-05 | 1.29E-05 | NF2/HBEGF/BTK/HCK/EPHA3/PTK2B/PPP2R1A/IGF1R/MATK/CLK1/WEI1/ERBB4/ITGB3/ALK/IFNG/SEMA4D/CD74/IL2                           |
| BP    | GO:0050866 | negative regulation of cell activation        | 13/189    | 200/18862 | 1.17E-07 | 4.87E-05 | 3.34E-05 | F2/HMOX1/BTK/ALOX12/BPI/HLA-DRB1/TNFAIP8L2/HMGB3/PARP3/CD74/IL2/NR1H3/SHH                                                 |
| BP    | GO:0030850 | prostate gland development                    | 7/189     | 41/18862  | 1.53E-07 | 5.73E-05 | 3.93E-05 | RARG/AR/ESR1/PSAP/NOTCH1/GLI1/SHH                                                                                         |
| BP    | GO:0060249 | anatomical structure homeostasis              | 19/189    | 466/18862 | 2.43E-07 | 8.28E-05 | 5.68E-05 | POT1/XRCC6/RAC1/PTK2B/HSP90AB1/B2M/SMG5/TLR4/HNRNPA2B1/ITGB3/PARN/RPA3/NOTCH1/TJP1/APEX1/ALB/PDK4/PARP3/POLA1             |
| BP    | GO:0060333 | interferon-gamma-mediated signaling pathway   | 9/189     | 91/18862  | 3.25E-07 | 1.01E-04 | 6.96E-05 | HCK/TRIM21/HSP90AB1/B2M/IFNGR1/HLA-DRB1/PPARG/IFNG/NR1H3                                                                  |

|    |            |                                              |        |           |          |          |          |                                                                                               |
|----|------------|----------------------------------------------|--------|-----------|----------|----------|----------|-----------------------------------------------------------------------------------------------|
| BP | GO:0033002 | muscle cell proliferation                    | 13/189 | 222/18862 | 3.91E-07 | 1.13E-04 | 7.72E-05 | XRCC6/MMP2/HBEGF/HMOX1/ALOX12/ERBB4/PPARG/NOTCH1/IFNG/ANG/ABCC4/GLI1/SHH                      |
| BP | GO:0046777 | protein autophosphorylation                  | 13/189 | 226/18862 | 4.79E-07 | 1.28E-04 | 8.79E-05 | BTK/MAP3K3/HCK/PTK2B/IGF1R/CLK1/CSNK1G2/BCR/ERBB4/ALK/DAPK2/STK4/OXSR1                        |
| BP | GO:0019217 | regulation of fatty acid metabolic process   | 9/189  | 98/18862  | 6.15E-07 | 1.45E-04 | 9.94E-05 | ACADVL/FABP3/PDK2/CYP7A1/ACACB/PPARG/PDK4/CD74/NR1H3                                          |
| BP | GO:0019216 | regulation of lipid metabolic process        | 17/189 | 402/18862 | 6.53E-07 | 1.45E-04 | 9.94E-05 | F2/ACADVL/HMGCS1/VAV3/FABP3/PTK2B/PDK2/PSAP/CYP7A1/ACACB/ALK/PPARG/IFNG/GGPS1/PDK4/CD74/NR1H3 |
| BP | GO:0010631 | epithelial cell migration                    | 16/189 | 357/18862 | 6.58E-07 | 1.45E-04 | 9.94E-05 | HBEGF/HMOX1/ZEB2/MAP3K3/RAC1/PTK2B/HDAC7/ALOX12/ITGB3/FAP/PPARG/NOTCH1/IFNG/DPP4/ARF6/STARD13 |
| BP | GO:0045088 | regulation of innate immune response         | 15/189 | 315/18862 | 6.99E-07 | 1.45E-04 | 9.94E-05 | CUL1/EP300/XRCC6/MUC1/HCK/TRIM21/HSP90AB1/SKP1/TLR4/IFNGR1/PPARG/IFNG/BTRC/XIAP/NR1H3         |
| BP | GO:0090132 | epithelium migration                         | 16/189 | 360/18862 | 7.35E-07 | 1.45E-04 | 9.94E-05 | HBEGF/HMOX1/ZEB2/MAP3K3/RAC1/PTK2B/HDAC7/ALOX12/ITGB3/FAP/PPARG/NOTCH1/IFNG/DPP4/ARF6/STARD13 |
| BP | GO:0090130 | tissue migration                             | 16/189 | 365/18862 | 8.82E-07 | 1.65E-04 | 1.13E-04 | HBEGF/HMOX1/ZEB2/MAP3K3/RAC1/PTK2B/HDAC7/ALOX12/ITGB3/FAP/PPARG/NOTCH1/IFNG/DPP4/ARF6/STARD13 |
| BP | GO:0019395 | fatty acid oxidation                         | 9/189  | 105/18862 | 1.11E-06 | 1.97E-04 | 1.35E-04 | HSD17B4/ACADVL/FABP3/ALOX12/ACACB/PPARG/ECI2/ECHS1/PDK4                                       |
| BP | GO:0034440 | lipid oxidation                              | 9/189  | 110/18862 | 1.64E-06 | 2.79E-04 | 1.91E-04 | HSD17B4/ACADVL/FABP3/ALOX12/ACACB/PPARG/ECI2/ECHS1/PDK4                                       |
| BP | GO:0042180 | cellular ketone metabolic process            | 13/189 | 254/18862 | 1.78E-06 | 2.90E-04 | 1.99E-04 | ACADVL/FABP3/PDK2/CYP7A1/ACACB/PPARG/ODC1/PDK4/NMT1/CD74/CYP17A1/SRD5A2/NR1H3                 |
| BP | GO:0060736 | prostate gland growth                        | 4/189  | 10/18862  | 1.96E-06 | 3.05E-04 | 2.09E-04 | AR/ESR1/PSAP/SHH                                                                              |
| BP | GO:0002695 | negative regulation of leukocyte activation  | 11/189 | 182/18862 | 2.31E-06 | 3.46E-04 | 2.37E-04 | HMOX1/BTK/BPI/HLA-DRB1/TNFAIP8L2/HMGB3/PARP3/CD74/IL2/NR1H3/SHH                               |
| BP | GO:0002683 | negative regulation of immune system process | 16/189 | 403/18862 | 3.19E-06 | 4.59E-04 | 3.15E-04 | HMOX1/BTK/TRIM21/BPI/TLR4/HLA-DRB1/PPARG/RARA/TNFAIP8L2/DPP4/HMGB3/PARP3/CD74/IL2/NR1H3/SHH   |
| BP | GO:0006694 | steroid biosynthetic process                 | 11/189 | 190/18862 | 3.50E-06 | 4.72E-04 | 3.24E-04 | HSD17B4/HMGCS1/CYP7A1/ACACB/IFNG/GGPS1/G6PD/CYP17A1/DHCR24/NPC1L1/SRD5A2                      |

|    |            |                                                           |        |           |          |          |          |                                                                                                |
|----|------------|-----------------------------------------------------------|--------|-----------|----------|----------|----------|------------------------------------------------------------------------------------------------|
| BP | GO:0042493 | response to drug                                          | 15/189 | 359/18862 | 3.53E-06 | 4.72E-04 | 3.24E-04 | HMGCS1/HMOX1/VAV3/VEGFB/FABP3/PTK2B/HSP90AB1/B2M/ACACB/GAD2/CYP2E1/PPARG/APEX1/NPC1L1/ABCC4    |
| BP | GO:0060330 | regulation of response to interferon-gamma                | 5/189  | 25/18862  | 4.33E-06 | 5.10E-04 | 3.50E-04 | HSP90AB1/IFNGR1/PPARG/IFNG/NR1H3                                                               |
| BP | GO:0060334 | regulation of interferon-gamma-mediated signaling pathway | 5/189  | 25/18862  | 4.33E-06 | 5.10E-04 | 3.50E-04 | HSP90AB1/IFNGR1/PPARG/IFNG/NR1H3                                                               |
| BP | GO:0060740 | prostate gland epithelium morphogenesis                   | 5/189  | 25/18862  | 4.33E-06 | 5.10E-04 | 3.50E-04 | RARG/AR/ESR1/NOTCH1/SHH                                                                        |
| BP | GO:0048732 | gland development                                         | 16/189 | 413/18862 | 4.36E-06 | 5.10E-04 | 3.50E-04 | RARG/HK2/HMGCS1/AR/HMOX1/ESR1/MSN/PSAP/ERBB4/NOTCH1/SERPINA5/ZIC3/BTRC/ARF6/GLI1/SHH           |
| BP | GO:0034341 | response to interferon-gamma                              | 11/189 | 197/18862 | 4.96E-06 | 5.63E-04 | 3.86E-04 | HCK/TRIM21/HSP90AB1/B2M/TLR4/IFNGR1/HLA-DRB1/PPARG/IFNG/CD74/NR1H3                             |
| BP | GO:0000723 | telomere maintenance                                      | 10/189 | 161/18862 | 5.27E-06 | 5.77E-04 | 3.96E-04 | POT1/XRCC6/HSP90AB1/SMG5/HNRNPA2B1/PARN/RPA3/APEX1/PARP3/POLA1                                 |
| BP | GO:0002831 | regulation of response to biotic stimulus                 | 16/189 | 420/18862 | 5.39E-06 | 5.77E-04 | 3.96E-04 | CUL1/EP300/XRCC6/MUC1/HCK/TRIM21/HSP90AB1/SKP1/TLR4/IFNGR1/HLA-DRB1/PPARG/IFNG/BTRC/XIAP/NR1H3 |
| BP | GO:0060512 | prostate gland morphogenesis                              | 5/189  | 27/18862  | 6.47E-06 | 6.73E-04 | 4.61E-04 | RARG/AR/ESR1/NOTCH1/SHH                                                                        |
| BP | GO:0050673 | epithelial cell proliferation                             | 16/189 | 428/18862 | 6.84E-06 | 6.85E-04 | 4.70E-04 | AR/HMOX1/VEGFB/ESR1/F3/B2M/TLR4/ITGB3/FAP/PPARG/NOTCH1/ANG/BTRC/SFN/GLI1/SHH                   |
| BP | GO:0043627 | response to estrogen                                      | 7/189  | 71/18862  | 7.02E-06 | 6.85E-04 | 4.70E-04 | EP300/AR/HMOX1/ESR1/DTYMK/PPARG/RARA                                                           |
| BP | GO:0051972 | regulation of telomerase activity                         | 6/189  | 47/18862  | 7.13E-06 | 6.85E-04 | 4.70E-04 | POT1/HSP90AB1/HNRNPA2B1/PARN/PPARG/PARP3                                                       |
| BP | GO:0006695 | cholesterol biosynthetic process                          | 7/189  | 72/18862  | 7.71E-06 | 7.05E-04 | 4.83E-04 | HMGCS1/CYP7A1/ACACB/GGPS1/G6PD/DHCR24/NPC1L1                                                   |
| BP | GO:1902653 | secondary alcohol biosynthetic process                    | 7/189  | 72/18862  | 7.71E-06 | 7.05E-04 | 4.83E-04 | HMGCS1/CYP7A1/ACACB/GGPS1/G6PD/DHCR24/NPC1L1                                                   |
| BP | GO:0045621 | positive regulation of lymphocyte differentiation         | 8/189  | 101/18862 | 8.00E-06 | 7.13E-04 | 4.89E-04 | XRCC6/BTK/HLA-DRB1/RARA/IFNG/CD74/IL2/SHH                                                      |
| BP | GO:0010632 | regulation of epithelial cell migration                   | 13/189 | 293/18862 | 8.49E-06 | 7.39E-04 | 5.07E-04 | HBEGF/HMOX1/MAP3K3/RAC1/PTK2B/HDAC7/ALOX12/ITGB3/PPARG/NOTCH1/IFNG/ARF6/STARD13                |

|    |            |                                                      |        |           |          |          |          |                                                                                           |
|----|------------|------------------------------------------------------|--------|-----------|----------|----------|----------|-------------------------------------------------------------------------------------------|
| BP | GO:1903829 | positive regulation of cellular protein localization | 13/189 | 295/18862 | 9.13E-06 | 7.77E-04 | 5.33E-04 | F2/EPHA3/HSP90AB1/MSN/YWHAQ/ERBB4/IFNG/ARF6/YWHAH/SFN/NMT1/NDC80/SHH                      |
| BP | GO:0007596 | blood coagulation                                    | 14/189 | 342/18862 | 9.51E-06 | 7.91E-04 | 5.42E-04 | F2/VAV3/HBB/RAC1/ALOX12/F3/ITPK1/TLR4/ITGB3/FAP/SERPINA5/PRKCB/FN1/SHH                    |
| BP | GO:0045927 | positive regulation of growth                        | 12/189 | 253/18862 | 9.75E-06 | 7.94E-04 | 5.44E-04 | F2/HBEGF/PTK2B/EXOSC9/ACACB/ERBB4/NOTCH1/SFN/FN1/SEMA4D/IL2/GLI1                          |
| BP | GO:0032200 | telomere organization                                | 10/189 | 174/18862 | 1.05E-05 | 8.22E-04 | 5.64E-04 | POT1/XRCC6/HSP90AB1/SMG5/HNRNPA2B1/PARN/RPA3/APEX1/PARP3/POLA1                            |
| BP | GO:0007599 | hemostasis                                           | 14/189 | 346/18862 | 1.08E-05 | 8.22E-04 | 5.64E-04 | F2/VAV3/HBB/RAC1/ALOX12/F3/ITPK1/TLR4/ITGB3/FAP/SERPINA5/PRKCB/FN1/SHH                    |
| BP | GO:0010634 | positive regulation of epithelial cell migration     | 10/189 | 175/18862 | 1.10E-05 | 8.22E-04 | 5.64E-04 | HBEGF/HMOX1/MAP3K3/RAC1/PTK2B/HDAC7/ALOX12/ITGB3/IFNG/ARF6                                |
| BP | GO:0008209 | androgen metabolic process                           | 5/189  | 30/18862  | 1.11E-05 | 8.22E-04 | 5.64E-04 | HSD17B4/ESR1/CYP17A1/SRD5A2/SHH                                                           |
| BP | GO:0050817 | coagulation                                          | 14/189 | 347/18862 | 1.12E-05 | 8.22E-04 | 5.64E-04 | F2/VAV3/HBB/RAC1/ALOX12/F3/ITPK1/TLR4/ITGB3/FAP/SERPINA5/PRKCB/FN1/SHH                    |
| BP | GO:0071346 | cellular response to interferon-gamma                | 10/189 | 177/18862 | 1.22E-05 | 8.66E-04 | 5.94E-04 | HCK/TRIM21/HSP90AB1/B2M/TLR4/IFNGR1/HLA-DRB1/PPARG/IFNG/NR1H3                             |
| BP | GO:2000278 | regulation of DNA biosynthetic process               | 8/189  | 107/18862 | 1.23E-05 | 8.66E-04 | 5.94E-04 | POT1/PTK2B/HSP90AB1/SMG5/HNRNPA2B1/PARN/PPARG/PARP3                                       |
| BP | GO:0016126 | sterol biosynthetic process                          | 7/189  | 78/18862  | 1.32E-05 | 9.12E-04 | 6.25E-04 | HMGCS1/CYP7A1/ACACB/GGPS1/G6PD/DHCR24/NPC1L1                                              |
| BP | GO:0030098 | lymphocyte differentiation                           | 14/189 | 358/18862 | 1.59E-05 | 1.07E-03 | 7.36E-04 | EP300/XRCC6/BTK/PTK2B/MSH2/B2M/HLA-DRB1/RARA/YY1/IFNG/HMGB3/CD74/IL2/SHH                  |
| BP | GO:0022612 | gland morphogenesis                                  | 8/189  | 111/18862 | 1.60E-05 | 1.07E-03 | 7.36E-04 | RARG/AR/ESR1/MSN/NOTCH1/BTRC/GLI1/SHH                                                     |
| BP | GO:0051222 | positive regulation of protein transport             | 13/189 | 312/18862 | 1.66E-05 | 1.08E-03 | 7.40E-04 | RAC1/HSP90AB1/YWHAQ/TLR4/HLA-DRB1/IFNG/ANG/B3GAT3/ARF6/YWHAH/SFN/NMT1/SHH                 |
| BP | GO:0072521 | purine-containing compound metabolic process         | 16/189 | 460/18862 | 1.67E-05 | 1.08E-03 | 7.40E-04 | HK2/EP300/HSD17B4/HMGCS1/NME3/MTAP/PAPSS1/TTR/PDK2/SULT1A1/ACACB/PGK1/IFNG/FHIT/GART/PDK4 |
| BP | GO:1903131 | mononuclear cell differentiation                     | 15/189 | 411/18862 | 1.77E-05 | 1.11E-03 | 7.62E-04 | EP300/XRCC6/BTK/PTK2B/MSH2/B2M/HLA-DRB1/PPARG/RARA/YY1/IFNG/HMGB3/CD74/IL2/SHH            |



|    |            |                                                              |        |           |          |          |          |                                                                                         |
|----|------------|--------------------------------------------------------------|--------|-----------|----------|----------|----------|-----------------------------------------------------------------------------------------|
| BP | GO:0010565 | regulation of cellular ketone metabolic process              | 10/189 | 185/18862 | 1.79E-05 | 1.11E-03 | 7.62E-04 | ACADVL/FABP3/PDK2/CYP7A1/ACACB/PPARG/ODC1/PDK4/CD74/NR1H3                               |
| BP | GO:0046320 | regulation of fatty acid oxidation                           | 5/189  | 33/18862  | 1.81E-05 | 1.11E-03 | 7.62E-04 | ACADVL/FABP3/ACACB/PPARG/PDK4                                                           |
| BP | GO:1903706 | regulation of hemopoiesis                                    | 15/189 | 415/18862 | 1.98E-05 | 1.20E-03 | 8.22E-04 | RARG/EP300/XRCC6/BTK/PTK2B/B2M/TLR4/HLA-DRB1/RARA/IFNG/PRKCB/HMGB3/CD74/IL2/SHH         |
| BP | GO:0045834 | positive regulation of lipid metabolic process               | 9/189  | 150/18862 | 2.07E-05 | 1.23E-03 | 8.45E-04 | F2/VAV3/FABP3/PTK2B/CYP7A1/PPARG/IFNG/CD74/NR1H3                                        |
| BP | GO:0046661 | male sex differentiation                                     | 9/189  | 153/18862 | 2.43E-05 | 1.42E-03 | 9.73E-04 | CSDE1/RRM1/HSD17B4/HMGCS1/AR/ESR1/MSH2/SRD5A2/SHH                                       |
| BP | GO:0043542 | endothelial cell migration                                   | 12/189 | 278/18862 | 2.49E-05 | 1.42E-03 | 9.73E-04 | HMOX1/MAP3K3/RAC1/PTK2B/HDAC7/ALOX12/ITGB3/FAP/PPARG/NOTCH1/DPP4/STARD13                |
| BP | GO:0006066 | alcohol metabolic process                                    | 14/189 | 373/18862 | 2.50E-05 | 1.42E-03 | 9.73E-04 | ACADVL/HMGCS1/PTK2B/TTR/ADH1C/ITPK1/SULT1A1/CYP7A1/ACACB/GGPS1/G6PD/CHKA/DHCR24/NPC1L1  |
| BP | GO:0071897 | DNA biosynthetic process                                     | 10/189 | 194/18862 | 2.69E-05 | 1.49E-03 | 1.02E-03 | POT1/PTK2B/HSP90AB1/SMG5/HNRNPA2B1/PARN/RPA3/PPARG/PARP3/POLA1                          |
| BP | GO:0045428 | regulation of nitric oxide biosynthetic process              | 6/189  | 59/18862  | 2.71E-05 | 1.49E-03 | 1.02E-03 | HBB/RAC1/PTK2B/HSP90AB1/TLR4/IFNG                                                       |
| BP | GO:1904951 | positive regulation of establishment of protein localization | 13/189 | 328/18862 | 2.79E-05 | 1.52E-03 | 1.04E-03 | RAC1/HSP90AB1/YWHAQ/TLR4/HLA-DRB1/IFNG/ANG/B3GAT3/ARF6/YWHAH/SFN/NMT1/SHH               |
| BP | GO:0080164 | regulation of nitric oxide metabolic process                 | 6/189  | 61/18862  | 3.28E-05 | 1.76E-03 | 1.20E-03 | HBB/RAC1/PTK2B/HSP90AB1/TLR4/IFNG                                                       |
| BP | GO:0019693 | ribose phosphate metabolic process                           | 15/189 | 435/18862 | 3.42E-05 | 1.80E-03 | 1.23E-03 | HK2/EP300/HSD17B4/HMGCS1/NME3/PAPSS1/PYGL/PDK2/SULT1A1/ACACB/PGK1/IFNG/GART/G6PD/PDK4   |
| BP | GO:0048660 | regulation of smooth muscle cell proliferation               | 9/189  | 160/18862 | 3.46E-05 | 1.80E-03 | 1.23E-03 | XRCC6/MMP2/HBEGF/HMOX1/ALOX12/PPARG/IFNG/ANG/ABCC4                                      |
| BP | GO:0062012 | regulation of small molecule metabolic process               | 15/189 | 437/18862 | 3.60E-05 | 1.85E-03 | 1.27E-03 | EP300/ACADVL/HMGCS1/FABP3/PTK2B/PDK2/CYP7A1/ACACB/PPARG/ODC1/IFNG/GGPS1/PDK4/CD74/NR1H3 |
| BP | GO:0045429 | positive regulation of nitric oxide biosynthetic process     | 5/189  | 38/18862  | 3.68E-05 | 1.86E-03 | 1.28E-03 | HBB/PTK2B/HSP90AB1/TLR4/IFNG                                                            |

|    |            |                                                       |        |           |          |          |          |                                                                                       |
|----|------------|-------------------------------------------------------|--------|-----------|----------|----------|----------|---------------------------------------------------------------------------------------|
| BP | GO:0048659 | smooth muscle cell proliferation                      | 9/189  | 162/18862 | 3.81E-05 | 1.90E-03 | 1.30E-03 | XRCC6/MMP2/HBEGF/HMOX1/ALOX12/PPARG/IFNG/ANG/ABCC4                                    |
| BP | GO:0046890 | regulation of lipid biosynthetic process              | 10/189 | 203/18862 | 3.96E-05 | 1.95E-03 | 1.34E-03 | ACADVL/HMGCS1/FABP3/CYP7A1/ACACB/IFNG/GGPS1/PDK4/CD74/NR1H3                           |
| BP | GO:1904407 | positive regulation of nitric oxide metabolic process | 5/189  | 39/18862  | 4.18E-05 | 2.03E-03 | 1.39E-03 | HBB/PTK2B/HSP90AB1/TLR4/IFNG                                                          |
| BP | GO:0006631 | fatty acid metabolic process                          | 14/189 | 392/18862 | 4.30E-05 | 2.07E-03 | 1.42E-03 | HSD17B4/ACADVL/FABP3/ALOX12/PDK2/CYP7A1/ACACB/CYP2E1/PPARG/ECI2/ECHS1/PDK4/CD74/NR1H3 |
| BP | GO:0045637 | regulation of myeloid cell differentiation            | 11/189 | 258/18862 | 6.09E-05 | 2.89E-03 | 1.98E-03 | RARG/EP300/PTK2B/B2M/TLR4/HLA-DRB1/RARA/IFNG/PRKCB/HMGB3/CD74                         |
| BP | GO:0008584 | male gonad development                                | 8/189  | 134/18862 | 6.23E-05 | 2.92E-03 | 2.00E-03 | CSDE1/RRM1/HSD17B4/HMGCS1/AR/ESR1/MSH2/SRD5A2                                         |
| BP | GO:0051251 | positive regulation of lymphocyte activation          | 13/189 | 356/18862 | 6.48E-05 | 2.99E-03 | 2.05E-03 | XRCC6/VAV3/BTK/RAC1/MSH2/TLR4/HLA-DRB1/RARA/IFNG/DPP4/CD74/IL2/SHH                    |
| BP | GO:0046546 | development of primary male sexual characteristics    | 8/189  | 135/18862 | 6.56E-05 | 3.00E-03 | 2.05E-03 | CSDE1/RRM1/HSD17B4/HMGCS1/AR/ESR1/MSH2/SRD5A2                                         |
| BP | GO:0034754 | cellular hormone metabolic process                    | 8/189  | 136/18862 | 6.91E-05 | 3.07E-03 | 2.11E-03 | HSD17B4/ESR1/TTR/ADH1C/SULT1A1/CYP17A1/SRD5A2/SHH                                     |
| BP | GO:0045619 | regulation of lymphocyte differentiation              | 9/189  | 175/18862 | 6.95E-05 | 3.07E-03 | 2.11E-03 | XRCC6/BTK/HLA-DRB1/RARA/IFNG/HMGB3/CD74/IL2/SHH                                       |
| BP | GO:0007548 | sex differentiation                                   | 11/189 | 262/18862 | 6.99E-05 | 3.07E-03 | 2.11E-03 | CSDE1/RRM1/HSD17B4/HMGCS1/AR/ESR1/MSH2/ANG/CYP17A1/SRD5A2/SHH                         |
| BP | GO:0046425 | regulation of JAK-STAT cascade                        | 7/189  | 101/18862 | 7.06E-05 | 3.07E-03 | 2.11E-03 | F2/NF2/PTK2B/PPP2R1A/ERBB4/NOTCH1/IFNG                                                |
| BP | GO:0002699 | positive regulation of immune effector process        | 10/189 | 219/18862 | 7.49E-05 | 3.20E-03 | 2.19E-03 | HMOX1/BTK/MSH2/B2M/TLR4/HLA-DRB1/RARA/IFNG/CD74/IL2                                   |
| BP | GO:0046620 | regulation of organ growth                            | 7/189  | 102/18862 | 7.51E-05 | 3.20E-03 | 2.19E-03 | ACACB/ERBB4/NOTCH1/YY1/STK4/G6PD/GLI1                                                 |
| BP | GO:0048708 | astrocyte differentiation                             | 6/189  | 72/18862  | 8.44E-05 | 3.55E-03 | 2.43E-03 | F2/TLR4/IFNGR1/NOTCH1/IFNG/SHH                                                        |
| BP | GO:0001818 | negative regulation of cytokine production            | 13/189 | 367/18862 | 8.80E-05 | 3.66E-03 | 2.51E-03 | F2/HMOX1/BTK/RAC1/HDAC7/HSP90AB1/BPI/TLR4/HLA-DRB1/RARA/YY1/IFNG/FN1                  |

|    |            |                                                                                                     |        |           |          |          |          |                                                                                       |
|----|------------|-----------------------------------------------------------------------------------------------------|--------|-----------|----------|----------|----------|---------------------------------------------------------------------------------------|
| BP | GO:0050920 | regulation of chemotaxis                                                                            | 10/189 | 224/18862 | 9.03E-05 | 3.71E-03 | 2.54E-03 | VEGFB/RAC1/PTK2B/F3/DAPK2/NOTCH1/DPP4/OXSR1/SEMA4D/CD74                               |
| BP | GO:0006809 | nitric oxide biosynthetic process                                                                   | 6/189  | 73/18862  | 9.12E-05 | 3.71E-03 | 2.54E-03 | HBB/RAC1/PTK2B/HSP90AB1/TLR4/IFNG                                                     |
| BP | GO:1903793 | positive regulation of anion transport                                                              | 15/189 | 478/18862 | 9.88E-05 | 3.98E-03 | 2.73E-03 | FABP3/RAC1/HSP90AB1/YWHAQ/TLR4/HLA-DRB1/IFNG/ANG/B3GAT3/ARF6/YWHAH/SFN/NMT1/NR1H3/SHH |
| BP | GO:0072332 | intrinsic apoptotic signaling pathway by p53 class mediator                                         | 6/189  | 75/18862  | 1.06E-04 | 4.19E-03 | 2.87E-03 | EP300/MUC1/MSH2/PDK2/FHIT/CD74                                                        |
| BP | GO:0050678 | regulation of epithelial cell proliferation                                                         | 13/189 | 374/18862 | 1.06E-04 | 4.19E-03 | 2.87E-03 | AR/HMOX1/VEGFB/F3/B2M/TLR4/ITGB3/PPARG/NOTCH1/ANG/SFN/GLI1/SHH                        |
| BP | GO:0060742 | epithelial cell differentiation involved in prostate gland development                              | 3/189  | 10/18862  | 1.13E-04 | 4.30E-03 | 2.95E-03 | AR/PSAP/NOTCH1                                                                        |
| BP | GO:0002700 | regulation of production of molecular mediator of immune response                                   | 8/189  | 146/18862 | 1.14E-04 | 4.30E-03 | 2.95E-03 | HMOX1/BTK/MSH2/B2M/TLR4/PARP3/CD74/IL2                                                |
| BP | GO:0044013 | negative regulation of locomotion                                                                   | 13/189 | 377/18862 | 1.15E-04 | 4.30E-03 | 2.95E-03 | NF2/HMOX1/RAC1/ERBB4/MAGI2/PPARG/NOTCH1/DPP4/APEX1/STAR D13/SEMA4D/CD74/SHH           |
| BP | GO:0042113 | B cell activation                                                                                   | 12/189 | 326/18862 | 1.15E-04 | 4.30E-03 | 2.95E-03 | EP300/VAV3/BTK/PTK2B/MSH2/TLR4/YY1/PRKCB/HMGB3/PARP3/CD74/IL2                         |
| BP | GO:0010594 | regulation of endothelial cell migration                                                            | 10/189 | 231/18862 | 1.16E-04 | 4.30E-03 | 2.95E-03 | HMOX1/MAP3K3/RAC1/PTK2B/HDAC7/ALOX12/ITGB3/PPARG/NOTCH1/STARD13                       |
| BP | GO:0044282 | small molecule catabolic process                                                                    | 14/189 | 431/18862 | 1.18E-04 | 4.30E-03 | 2.95E-03 | HK2/HSD17B4/ACADVL/DCXR/HPD/PAH/SULT1A1/CYP7A1/ACACB/GAD2/PGK1/ECI2/ECHS1/OAT         |
| BP | GO:0046394 | carboxylic acid biosynthetic process                                                                | 12/189 | 327/18862 | 1.19E-04 | 4.30E-03 | 2.95E-03 | HSD17B4/ACADVL/MTAP/ALOX12/PAH/CYP7A1/ACACB/CYP2E1/OAT/PDK4/CD74/NR1H3                |
| BP | GO:1904892 | regulation of STAT cascade                                                                          | 7/189  | 110/18862 | 1.21E-04 | 4.30E-03 | 2.95E-03 | F2/NF2/PTK2B/PPP2R1A/ERBB4/NOTCH1/IFNG                                                |
| BP | GO:1900739 | regulation of protein insertion into mitochondrial membrane involved in apoptotic signaling pathway | 4/189  | 26/18862  | 1.23E-04 | 4.30E-03 | 2.95E-03 | YWHAQ/YWHAH/SFN/NMT1                                                                  |

|    |            |                                                                                                              |        |           |          |          |          |                                                                                   |
|----|------------|--------------------------------------------------------------------------------------------------------------|--------|-----------|----------|----------|----------|-----------------------------------------------------------------------------------|
| BP | GO:1900740 | positive regulation of protein insertion into mitochondrial membrane involved in apoptotic signaling pathway | 4/189  | 26/18862  | 1.23E-04 | 4.30E-03 | 2.95E-03 | YWHAQ/YWHAH/SFN/NMT1                                                              |
| BP | GO:0046209 | nitric oxide metabolic process                                                                               | 6/189  | 77/18862  | 1.23E-04 | 4.30E-03 | 2.95E-03 | HBB/RAC1/PTK2B/HSP90AB1/TLR4/IFNG                                                 |
| BP | GO:0060420 | regulation of heart growth                                                                                   | 6/189  | 77/18862  | 1.23E-04 | 4.30E-03 | 2.95E-03 | ACACB/ERBB4/NOTCH1/YY1/G6PD/GLI1                                                  |
| BP | GO:0002218 | activation of innate immune response                                                                         | 8/189  | 148/18862 | 1.25E-04 | 4.30E-03 | 2.95E-03 | CUL1/EP300/XRCC6/MUC1/HCK/SKP1/TLR4/BTRC                                          |
| BP | GO:0002285 | lymphocyte activation involved in immune response                                                            | 9/189  | 189/18862 | 1.25E-04 | 4.30E-03 | 2.95E-03 | PTK2B/MSH2/TLR4/HLA-DRB1/RARA/IFNG/PARP3/CD74/IL2                                 |
| BP | GO:0030336 | negative regulation of cell migration                                                                        | 12/189 | 330/18862 | 1.29E-04 | 4.37E-03 | 3.00E-03 | NF2/HMOX1/RAC1/ERBB4/MAGI2/PPARG/NOTCH1/DPP4/APEX1/STAR D13/CD74/SHH              |
| BP | GO:0072593 | reactive oxygen species metabolic process                                                                    | 11/189 | 281/18862 | 1.30E-04 | 4.37E-03 | 3.00E-03 | F2/HK2/HBB/RAC1/PTK2B/ALOX12/HSP90AB1/TLR4/IFNG/G6PD/PDK4                         |
| BP | GO:0008203 | cholesterol metabolic process                                                                                | 8/189  | 149/18862 | 1.31E-04 | 4.37E-03 | 3.00E-03 | ACADVL/HMGCS1/CYP7A1/ACACB/GGPS1/G6PD/DHCR24/NPC1L1                               |
| BP | GO:2001057 | reactive nitrogen species metabolic process                                                                  | 6/189  | 78/18862  | 1.32E-04 | 4.37E-03 | 3.00E-03 | HBB/RAC1/PTK2B/HSP90AB1/TLR4/IFNG                                                 |
| BP | GO:0007050 | cell cycle arrest                                                                                            | 10/189 | 235/18862 | 1.34E-04 | 4.40E-03 | 3.02E-03 | EP300/MUC1/HSP90AB1/MSH2/FAP/MAGI2/NOTCH1/IFNG/SFN/DHCR24                         |
| BP | GO:2000377 | regulation of reactive oxygen species metabolic process                                                      | 9/189  | 192/18862 | 1.41E-04 | 4.59E-03 | 3.15E-03 | F2/HK2/HBB/RAC1/PTK2B/HSP90AB1/TLR4/IFNG/G6PD                                     |
| BP | GO:0015949 | nucleobase-containing small molecule interconversion                                                         | 4/189  | 27/18862  | 1.43E-04 | 4.60E-03 | 3.15E-03 | RRM1/NME3/DTYMK/DCTD                                                              |
| BP | GO:0008360 | regulation of cell shape                                                                                     | 8/189  | 151/18862 | 1.44E-04 | 4.60E-03 | 3.15E-03 | F2/RND1/RAC1/HCK/PTK2B/MSN/FN1/SEMA4D                                             |
| BP | GO:0016053 | organic acid biosynthetic process                                                                            | 12/189 | 335/18862 | 1.49E-04 | 4.65E-03 | 3.19E-03 | HSD17B4/ACADVL/MTAP/ALOX12/PAH/CYP7A1/ACACB/CYP2E1/OAT/PDK4/CD74/NR1H3            |
| BP | GO:0006163 | purine nucleotide metabolic process                                                                          | 14/189 | 441/18862 | 1.50E-04 | 4.65E-03 | 3.19E-03 | HK2/EP300/HSD17B4/HMGCS1/NME3/PAPSS1/PDK2/SULT1A1/ACACB/P GK1/IFNG/FHIT/GART/PDK4 |

|    |            |                                                    |        |           |          |          |          |                                                                      |
|----|------------|----------------------------------------------------|--------|-----------|----------|----------|----------|----------------------------------------------------------------------|
| BP | GO:0010660 | regulation of muscle cell apoptotic process        | 6/189  | 80/18862  | 1.52E-04 | 4.65E-03 | 3.19E-03 | HMOX1/PTK2B/ALOX12/PPARG/IFNG/STK4                                   |
| BP | GO:0038093 | Fc receptor signaling pathway                      | 10/189 | 239/18862 | 1.54E-04 | 4.65E-03 | 3.19E-03 | CUL1/VAV3/BTK/RAC1/HCK/FCGR2A/HSP90AB1/SKP1/NFATC1/BTRC              |
| BP | GO:0046598 | positive regulation of viral entry into host cell  | 3/189  | 11/18862  | 1.54E-04 | 4.65E-03 | 3.19E-03 | TRIM21/HLA-DRB1/CD74                                                 |
| BP | GO:0051974 | negative regulation of telomerase activity         | 3/189  | 11/18862  | 1.54E-04 | 4.65E-03 | 3.19E-03 | POT1/PPARG/PARP3                                                     |
| BP | GO:0075294 | positive regulation by symbiont of entry into host | 3/189  | 11/18862  | 1.54E-04 | 4.65E-03 | 3.19E-03 | TRIM21/HLA-DRB1/CD74                                                 |
| BP | GO:0051250 | negative regulation of lymphocyte activation       | 8/189  | 153/18862 | 1.57E-04 | 4.71E-03 | 3.23E-03 | BTK/HLA-DRB1/TNFAIP8L2/HMGB3/PARP3/CD74/IL2/SHH                      |
| BP | GO:1902107 | positive regulation of leukocyte differentiation   | 8/189  | 154/18862 | 1.64E-04 | 4.85E-03 | 3.33E-03 | XRCC6/BTK/HLA-DRB1/RARA/IFNG/CD74/IL2/SHH                            |
| BP | GO:1903708 | positive regulation of hemopoiesis                 | 8/189  | 154/18862 | 1.64E-04 | 4.85E-03 | 3.33E-03 | XRCC6/BTK/HLA-DRB1/RARA/IFNG/CD74/IL2/SHH                            |
| BP | GO:0046395 | carboxylic acid catabolic process                  | 10/189 | 243/18862 | 1.76E-04 | 5.15E-03 | 3.53E-03 | HSD17B4/ACADVL/DCXR/HPD/PAH/ACACB/GAD2/ECI2/ECHS1/OAT                |
| BP | GO:0046165 | alcohol biosynthetic process                       | 8/189  | 156/18862 | 1.80E-04 | 5.22E-03 | 3.58E-03 | HMGCS1/PTK2B/CYP7A1/ACACB/GGPS1/G6PD/DHCR24/NPC1L1                   |
| BP | GO:0045806 | negative regulation of endocytosis                 | 5/189  | 53/18862  | 1.86E-04 | 5.36E-03 | 3.68E-03 | RAC1/EPHA3/ITGB3/ARF6/NR1H3                                          |
| BP | GO:0030168 | platelet activation                                | 8/189  | 157/18862 | 1.88E-04 | 5.37E-03 | 3.68E-03 | F2/VAV3/HBB/ALOX12/TLR4/ITGB3/PRKCB/FN1                              |
| BP | GO:2000146 | negative regulation of cell motility               | 12/189 | 345/18862 | 1.95E-04 | 5.43E-03 | 3.72E-03 | NF2/HMOX1/RAC1/ERBB4/MAGI2/PPARG/NOTCH1/DPP4/APEX1/STAR D13/CD74/SHH |
| BP | GO:1902652 | secondary alcohol metabolic process                | 8/189  | 158/18862 | 1.96E-04 | 5.43E-03 | 3.72E-03 | ACADVL/HMGCS1/CYP7A1/ACACB/GGPS1/G6PD/DHCR24/NPC1L1                  |
| BP | GO:0002688 | regulation of leukocyte chemotaxis                 | 7/189  | 119/18862 | 1.98E-04 | 5.43E-03 | 3.72E-03 | VEGFB/RAC1/PTK2B/DAPK2/DPP4/OXSR1/CD74                               |
| BP | GO:0007162 | negative regulation of cell adhesion               | 11/189 | 295/18862 | 1.99E-04 | 5.43E-03 | 3.72E-03 | NF2/MUC1/RND1/ALOX12/HLA-DRB1/NOTCH1/TNFAIP8L2/SEMA4D/CD74/IL2/SHH   |

|    |            |                                                                                       |        |           |          |          |          |                                                                                 |
|----|------------|---------------------------------------------------------------------------------------|--------|-----------|----------|----------|----------|---------------------------------------------------------------------------------|
| BP | GO:0010657 | muscle cell apoptotic process                                                         | 6/189  | 84/18862  | 1.99E-04 | 5.43E-03 | 3.72E-03 | HMOX1/PTK2B/ALOX12/PPARG/IFNG/STK4                                              |
| BP | GO:0014031 | mesenchymal cell development                                                          | 6/189  | 84/18862  | 1.99E-04 | 5.43E-03 | 3.72E-03 | ERBB4/ANXA6/NOTCH1/FN1/SEMA4D/SHH                                               |
| BP | GO:0002381 | immunoglobulin production involved in immunoglobulin mediated immune response         | 5/189  | 54/18862  | 2.03E-04 | 5.48E-03 | 3.76E-03 | BTK/MSH2/HLA-DRB1/PARP3/IL2                                                     |
| BP | GO:0042304 | regulation of fatty acid biosynthetic process                                         | 5/189  | 54/18862  | 2.03E-04 | 5.48E-03 | 3.76E-03 | ACADVL/CYP7A1/PDK4/CD74/NR1H3                                                   |
| BP | GO:0002696 | positive regulation of leukocyte activation                                           | 13/189 | 401/18862 | 2.11E-04 | 5.65E-03 | 3.87E-03 | XRCC6/VAV3/BTK/RAC1/MSH2/TLR4/HLA-DRB1/RARA/IFNG/DPP4/CD74/IL2/SHH              |
| BP | GO:0050679 | positive regulation of epithelial cell proliferation                                  | 9/189  | 203/18862 | 2.14E-04 | 5.69E-03 | 3.90E-03 | AR/HMOX1/VEGFB/F3/TLR4/ITGB3/NOTCH1/ANG/SHH                                     |
| BP | GO:0001844 | protein insertion into mitochondrial membrane involved in apoptotic signaling pathway | 4/189  | 30/18862  | 2.18E-04 | 5.76E-03 | 3.95E-03 | YWHAQ/YWHAH/SFN/NMT1                                                            |
| BP | GO:0001755 | neural crest cell migration                                                           | 5/189  | 55/18862  | 2.22E-04 | 5.76E-03 | 3.95E-03 | ERBB4/ANXA6/FN1/SEMA4D/SHH                                                      |
| BP | GO:1903428 | positive regulation of reactive oxygen species biosynthetic process                   | 5/189  | 55/18862  | 2.22E-04 | 5.76E-03 | 3.95E-03 | HBB/PTK2B/HSP90AB1/TLR4/IFNG                                                    |
| BP | GO:0030307 | positive regulation of cell growth                                                    | 8/189  | 161/18862 | 2.23E-04 | 5.76E-03 | 3.95E-03 | F2/HBEGF/PTK2B/EXOSC9/SFN/FN1/SEMA4D/IL2                                        |
| BP | GO:0002685 | regulation of leukocyte migration                                                     | 9/189  | 205/18862 | 2.30E-04 | 5.91E-03 | 4.05E-03 | HMOX1/VEGFB/RAC1/PTK2B/MSN/DAPK2/DPP4/OXSR1/CD74                                |
| BP | GO:0051271 | negative regulation of cellular component movement                                    | 12/189 | 352/18862 | 2.34E-04 | 5.97E-03 | 4.09E-03 | NF2/HMOX1/RAC1/ERBB4/MAGI2/PPARG/NOTCH1/DPP4/APEX1/STAR/D13/CD74/SHH            |
| BP | GO:0002064 | epithelial cell development                                                           | 9/189  | 207/18862 | 2.47E-04 | 6.26E-03 | 4.29E-03 | RARG/HSD17B4/AR/ESR1/MSN/MAGI2/NOTCH1/TJP1/SFN                                  |
| BP | GO:0009150 | purine ribonucleotide metabolic process                                               | 13/189 | 408/18862 | 2.50E-04 | 6.28E-03 | 4.30E-03 | HK2/EP300/HSD17B4/HMGCS1/NME3/PAPSS1/PDK2/SULT1A1/ACACB/P<br>GK1/IFNG/GART/PDK4 |

|    |            |                                                                     |        |           |          |          |          |                                                                               |
|----|------------|---------------------------------------------------------------------|--------|-----------|----------|----------|----------|-------------------------------------------------------------------------------|
| BP | GO:0031334 | positive regulation of protein complex assembly                     | 10/189 | 254/18862 | 2.51E-04 | 6.28E-03 | 4.30E-03 | ESR1/RAC1/HCK/PTK2B/MSN/TLR4/RPA3/MMP1/IFNG/ARF6                              |
| BP | GO:0045582 | positive regulation of T cell differentiation                       | 6/189  | 88/18862  | 2.56E-04 | 6.36E-03 | 4.36E-03 | HLA-DRB1/RARA/IFNG/CD74/IL2/SHH                                               |
| BP | GO:0010745 | negative regulation of macrophage derived foam cell differentiation | 3/189  | 13/18862  | 2.63E-04 | 6.41E-03 | 4.39E-03 | ITGB3/PPARG/NR1H3                                                             |
| BP | GO:1903054 | negative regulation of extracellular matrix organization            | 3/189  | 13/18862  | 2.63E-04 | 6.41E-03 | 4.39E-03 | FAP/NOTCH1/DPP4                                                               |
| BP | GO:0016125 | sterol metabolic process                                            | 8/189  | 165/18862 | 2.63E-04 | 6.41E-03 | 4.39E-03 | ACADVL/HMGCS1/CYP7A1/ACACB/GGPS1/G6PD/DHCR24/NPC1L1                           |
| BP | GO:0050867 | positive regulation of cell activation                              | 13/189 | 412/18862 | 2.74E-04 | 6.59E-03 | 4.52E-03 | XRCC6/VAV3/BTK/RAC1/MSH2/TLR4/HLA-DRB1/RARA/IFNG/DPP4/CD74/IL2/SHH            |
| BP | GO:0007259 | JAK-STAT cascade                                                    | 8/189  | 166/18862 | 2.75E-04 | 6.59E-03 | 4.52E-03 | F2/NF2/PTK2B/PPP2R1A/ERBB4/NOTCH1/IFNG/IL2                                    |
| BP | GO:0090022 | regulation of neutrophil chemotaxis                                 | 4/189  | 32/18862  | 2.82E-04 | 6.73E-03 | 4.61E-03 | RAC1/DAPK2/DPP4/CD74                                                          |
| BP | GO:0016054 | organic acid catabolic process                                      | 10/189 | 258/18862 | 2.85E-04 | 6.75E-03 | 4.63E-03 | HSD17B4/ACADVL/DCXR/HPD/PAH/ACACB/GAD2/ECI2/ECHS1/OAT                         |
| BP | GO:0016049 | cell growth                                                         | 14/189 | 470/18862 | 2.88E-04 | 6.78E-03 | 4.65E-03 | F2/RARG/HBEGF/PTK2B/PPP2R1A/HSP90AB1/EXOSC9/PPARG/YY1/SFN/G6PD/FN1/SEMA4D/IL2 |
| BP | GO:1905477 | positive regulation of protein localization to membrane             | 7/189  | 127/18862 | 2.95E-04 | 6.82E-03 | 4.68E-03 | EPHA3/YWHAQ/IFNG/ARF6/YWHAH/SFN/NMT1                                          |
| BP | GO:0007163 | establishment or maintenance of cell polarity                       | 9/189  | 212/18862 | 2.95E-04 | 6.82E-03 | 4.68E-03 | RND1/RAC1/PTK2B/HSP90AB1/MSN/WEE1/ARF6/NDC80/SHH                              |
| BP | GO:0008406 | gonad development                                                   | 9/189  | 212/18862 | 2.95E-04 | 6.82E-03 | 4.68E-03 | CSDE1/RRM1/HSD17B4/HMGCS1/AR/ESR1/MSH2/ANG/SRD5A2                             |
| BP | GO:0006633 | fatty acid biosynthetic process                                     | 8/189  | 168/18862 | 2.98E-04 | 6.84E-03 | 4.69E-03 | ACADVL/ALOX12/CYP7A1/ACACB/CYP2E1/PDK4/CD74/NR1H3                             |
| BP | GO:0002690 | positive regulation of leukocyte chemotaxis                         | 6/189  | 91/18862  | 3.08E-04 | 6.98E-03 | 4.79E-03 | VEGFB/RAC1/PTK2B/DAPK2/OXSR1/CD74                                             |

|    |            |                                                                  |        |           |          |          |          |                                                                                 |
|----|------------|------------------------------------------------------------------|--------|-----------|----------|----------|----------|---------------------------------------------------------------------------------|
| BP | GO:0034502 | protein localization to chromosome                               | 6/189  | 91/18862  | 3.08E-04 | 6.98E-03 | 4.79E-03 | POT1/ESR1/MSH2/CTCF/NDC80/PARP3                                                 |
| BP | GO:0050730 | regulation of peptidyl-tyrosine phosphorylation                  | 10/189 | 262/18862 | 3.22E-04 | 7.19E-03 | 4.93E-03 | NF2/HBEGF/PTK2B/PPP2R1A/ERBB4/ITGB3/IFNG/SEMA4D/CD74/IL2                        |
| BP | GO:0051099 | positive regulation of binding                                   | 8/189  | 170/18862 | 3.22E-04 | 7.19E-03 | 4.93E-03 | EP300/TRIM21/HSP90AB1/B2M/PPARG/RARA/IFNG/STK4                                  |
| BP | GO:0030099 | myeloid cell differentiation                                     | 13/189 | 419/18862 | 3.22E-04 | 7.19E-03 | 4.93E-03 | RARG/EP300/PTK2B/B2M/TLR4/HLA-DRB1/PPARG/RARA/IFNG/PRKCB/HMGB3/G6PD/CD74        |
| BP | GO:0045137 | development of primary sexual characteristics                    | 9/189  | 217/18862 | 3.50E-04 | 7.76E-03 | 5.32E-03 | CSDE1/RRM1/HSD17B4/HMGCS1/AR/ESR1/MSH2/ANG/SRD5A2                               |
| BP | GO:0030888 | regulation of B cell proliferation                               | 5/189  | 61/18862  | 3.62E-04 | 7.90E-03 | 5.41E-03 | VAV3/BTK/TLR4/CD74/IL2                                                          |
| BP | GO:0090181 | regulation of cholesterol metabolic process                      | 5/189  | 61/18862  | 3.62E-04 | 7.90E-03 | 5.41E-03 | ACADVL/HMGCS1/CYP7A1/ACACB/GGPS1                                                |
| BP | GO:0051091 | positive regulation of DNA-binding transcription factor activity | 10/189 | 266/18862 | 3.63E-04 | 7.90E-03 | 5.41E-03 | EP300/AR/BTK/ESR1/TRIM21/TLR4/ALK/PPARG/PRKCB/SHH                               |
| BP | GO:0009259 | ribonucleotide metabolic process                                 | 13/189 | 425/18862 | 3.69E-04 | 7.95E-03 | 5.45E-03 | HK2/EP300/HSD17B4/HMGCS1/NME3/PAPSS1/PDK2/SULT1A1/ACACB/P<br>GK1/IFNG/GART/PDK4 |
| BP | GO:0045785 | positive regulation of cell adhesion                             | 13/189 | 425/18862 | 3.69E-04 | 7.95E-03 | 5.45E-03 | VAV3/RAC1/PTK2B/HLA-DRB1/RARA/TJP1/IFNG/STK4/DPP4/FN1/CD74/IL2/SHH              |
| BP | GO:0010595 | positive regulation of endothelial cell migration                | 7/189  | 132/18862 | 3.73E-04 | 7.97E-03 | 5.46E-03 | HMOX1/MAP3K3/RAC1/PTK2B/HDAC7/ALOX12/ITGB3                                      |
| BP | GO:0032388 | positive regulation of intracellular transport                   | 9/189  | 219/18862 | 3.75E-04 | 7.97E-03 | 5.46E-03 | HSP90AB1/MSN/YWHAQ/IFNG/B3GAT3/YWHAH/SFN/NMT1/SHH                               |
| BP | GO:0051235 | maintenance of location                                          | 11/189 | 319/18862 | 3.87E-04 | 8.19E-03 | 5.62E-03 | F2/HK2/PTK2B/SKP1/ACACB/ITGB3/ANXA6/PPARG/ATP7B/ALB/NR1H3                       |
| BP | GO:0043534 | blood vessel endothelial cell migration                          | 8/189  | 175/18862 | 3.92E-04 | 8.19E-03 | 5.62E-03 | HMOX1/MAP3K3/PTK2B/HDAC7/ALOX12/PPARG/NOTCH1/STARD13                            |
| BP | GO:0097696 | STAT cascade                                                     | 8/189  | 175/18862 | 3.92E-04 | 8.19E-03 | 5.62E-03 | F2/NF2/PTK2B/PPP2R1A/ERBB4/NOTCH1/IFNG/IL2                                      |



|    |            |                                                                                                              |        |           |          |          |          |                                                                            |
|----|------------|--------------------------------------------------------------------------------------------------------------|--------|-----------|----------|----------|----------|----------------------------------------------------------------------------|
| BP | GO:0010975 | regulation of neuron projection development                                                                  | 13/189 | 428/18862 | 3.95E-04 | 8.21E-03 | 5.63E-03 | EP300/MARK1/PTPRF/EPHA3/PTK2B/B2M/MAGI2/ALK/ARF6/YWHAH/RTN4IP1/FN1/SEMA4D  |
| BP | GO:1901030 | positive regulation of mitochondrial outer membrane permeabilization involved in apoptotic signaling pathway | 4/189  | 35/18862  | 4.01E-04 | 8.30E-03 | 5.69E-03 | YWHAQ/YWHAH/SFN/NMT1                                                       |
| BP | GO:0030258 | lipid modification                                                                                           | 10/189 | 270/18862 | 4.08E-04 | 8.30E-03 | 5.69E-03 | HSD17B4/ACADVL/FABP3/ALOX12/ACACB/CYP2E1/PPARG/ECI2/ECHS1/PDK4             |
| BP | GO:0045930 | negative regulation of mitotic cell cycle                                                                    | 11/189 | 321/18862 | 4.08E-04 | 8.30E-03 | 5.69E-03 | CUL1/EP300/MUC1/MSH2/SKP1/WEE1/FAP/MAGI2/NAE1/SFN/NDC80                    |
| BP | GO:0048010 | vascular endothelial growth factor receptor signaling pathway                                                | 6/189  | 96/18862  | 4.11E-04 | 8.30E-03 | 5.69E-03 | VAV3/VEGFB/RAC1/PTK2B/ITGB3/PRKCB                                          |
| BP | GO:0009263 | deoxyribonucleotide biosynthetic process                                                                     | 3/189  | 15/18862  | 4.12E-04 | 8.30E-03 | 5.69E-03 | RRM1/DTYMK/DCTD                                                            |
| BP | GO:0071391 | cellular response to estrogen stimulus                                                                       | 3/189  | 15/18862  | 4.12E-04 | 8.30E-03 | 5.69E-03 | AR/ESR1/RARA                                                               |
| BP | GO:0050773 | regulation of dendrite development                                                                           | 6/189  | 97/18862  | 4.34E-04 | 8.69E-03 | 5.96E-03 | MARK1/ALK/ARF6/YWHAH/RTN4IP1/SEMA4D                                        |
| BP | GO:0072330 | monocarboxylic acid biosynthetic process                                                                     | 9/189  | 224/18862 | 4.42E-04 | 8.80E-03 | 6.03E-03 | HSD17B4/ACADVL/ALOX12/CYP7A1/ACACB/CYP2E1/PDK4/CD74/NR1H3                  |
| BP | GO:0051148 | negative regulation of muscle cell differentiation                                                           | 5/189  | 64/18862  | 4.53E-04 | 8.97E-03 | 6.15E-03 | NFATC1/NOTCH1/YY1/G6PD/SHH                                                 |
| BP | GO:0090316 | positive regulation of intracellular protein transport                                                       | 8/189  | 179/18862 | 4.55E-04 | 8.97E-03 | 6.15E-03 | HSP90AB1/YWHAQ/IFNG/B3GAT3/YWHAH/SFN/NMT1/SHH                              |
| BP | GO:0030522 | intracellular receptor signaling pathway                                                                     | 10/189 | 274/18862 | 4.58E-04 | 8.98E-03 | 6.15E-03 | RARG/EP300/AR/ESR1/TLR4/PPARG/RARA/XIAP/YWHAH/NR1H3                        |
| BP | GO:0030010 | establishment of cell polarity                                                                               | 7/189  | 137/18862 | 4.67E-04 | 9.05E-03 | 6.21E-03 | PTK2B/HSP90AB1/MSN/WEE1/ARF6/NDC80/SHH                                     |
| BP | GO:0030183 | B cell differentiation                                                                                       | 7/189  | 137/18862 | 4.67E-04 | 9.05E-03 | 6.21E-03 | EP300/BTK/PTK2B/MSH2/YY1/HMGB3/IL2                                         |
| BP | GO:0022407 | regulation of cell-cell adhesion                                                                             | 13/189 | 437/18862 | 4.80E-04 | 9.27E-03 | 6.36E-03 | NF2/RAC1/ALOX12/HLA-DRB1/NOTCH1/RARA/TJP1/IFNG/TNFAIP8L2/DPP4/CD74/IL2/SHH |

|    |            |                                                                 |        |           |          |          |          |                                                                           |
|----|------------|-----------------------------------------------------------------|--------|-----------|----------|----------|----------|---------------------------------------------------------------------------|
| BP | GO:1903426 | regulation of reactive oxygen species biosynthetic process      | 6/189  | 99/18862  | 4.84E-04 | 9.30E-03 | 6.37E-03 | HBB/RAC1/PTK2B/HSP90AB1/TLR4/IFNG                                         |
| BP | GO:0051051 | negative regulation of transport                                | 13/189 | 438/18862 | 4.91E-04 | 9.38E-03 | 6.43E-03 | HMOX1/RAC1/EPHA3/PTK2B/YWHAQ/ITGB3/NOTCH1/ARF6/PRKCB/OXSR1/CD74/NR1H3/SHH |
| BP | GO:0042176 | regulation of protein catabolic process                         | 12/189 | 383/18862 | 5.01E-04 | 9.47E-03 | 6.49E-03 | PTK2B/WWP1/HSP90AB1/MSN/RAB26/ATXN3/ODC1/IFNG/SNX1/BTRC/FHIT/SHH          |
| BP | GO:0045591 | positive regulation of regulatory T cell differentiation        | 3/189  | 16/18862  | 5.04E-04 | 9.47E-03 | 6.49E-03 | HLA-DRB1/IFNG/IL2                                                         |
| BP | GO:0050921 | positive regulation of chemotaxis                               | 7/189  | 139/18862 | 5.09E-04 | 9.47E-03 | 6.49E-03 | VEGFB/RAC1/PTK2B/F3/DAPK2/OXSR1/CD74                                      |
| BP | GO:0055076 | transition metal ion homeostasis                                | 7/189  | 139/18862 | 5.09E-04 | 9.47E-03 | 6.49E-03 | CUL1/HMOX1/SKP1/B2M/ATP7B/IFNG/XIAP                                       |
| BP | GO:0008630 | intrinsic apoptotic signaling pathway in response to DNA damage | 6/189  | 100/18862 | 5.11E-04 | 9.47E-03 | 6.49E-03 | EP300/HMOX1/MUC1/MSH2/SFN/CD74                                            |
| BP | GO:0060419 | heart growth                                                    | 6/189  | 100/18862 | 5.11E-04 | 9.47E-03 | 6.49E-03 | ACACB/ERBB4/NOTCH1/YY1/G6PD/GLI1                                          |
| BP | GO:0042593 | glucose homeostasis                                             | 9/189  | 229/18862 | 5.18E-04 | 9.56E-03 | 6.55E-03 | HK2/RAC1/IGF1R/PYGL/PDK2/CYP7A1/HLA-DRB1/PPARG/PDK4                       |
| BP | GO:0070482 | response to oxygen levels                                       | 12/189 | 385/18862 | 5.25E-04 | 9.56E-03 | 6.55E-03 | HK2/EP300/MMP2/HMOX1/VEGFB/PTK2B/FAS/PPARG/PGK1/NOTCH1/ANG/DPP4           |
| BP | GO:1902105 | regulation of leukocyte differentiation                         | 10/189 | 279/18862 | 5.27E-04 | 9.56E-03 | 6.55E-03 | XRCC6/BTK/TLR4/HLA-DRB1/RARA/IFNG/HMGB3/CD74/IL2/SHH                      |
| BP | GO:0033865 | nucleoside bisphosphate metabolic process                       | 7/189  | 140/18862 | 5.31E-04 | 9.56E-03 | 6.55E-03 | HSD17B4/HMGCS1/PAPSS1/PDK2/SULT1A1/ACACB/PDK4                             |
| BP | GO:0033875 | ribonucleoside bisphosphate metabolic process                   | 7/189  | 140/18862 | 5.31E-04 | 9.56E-03 | 6.55E-03 | HSD17B4/HMGCS1/PAPSS1/PDK2/SULT1A1/ACACB/PDK4                             |
| BP | GO:0034032 | purine nucleoside bisphosphate metabolic process                | 7/189  | 140/18862 | 5.31E-04 | 9.56E-03 | 6.55E-03 | HSD17B4/HMGCS1/PAPSS1/PDK2/SULT1A1/ACACB/PDK4                             |
| BP | GO:0033500 | carbohydrate homeostasis                                        | 9/189  | 230/18862 | 5.34E-04 | 9.56E-03 | 6.55E-03 | HK2/RAC1/IGF1R/PYGL/PDK2/CYP7A1/HLA-DRB1/PPARG/PDK4                       |

|    |            |                                                                  |        |           |          |          |          |                                                                  |
|----|------------|------------------------------------------------------------------|--------|-----------|----------|----------|----------|------------------------------------------------------------------|
| BP | GO:1902106 | negative regulation of leukocyte differentiation                 | 6/189  | 101/18862 | 5.39E-04 | 9.56E-03 | 6.55E-03 | TLR4/RARA/HMGB3/CD74/IL2/SHH                                     |
| BP | GO:2000379 | positive regulation of reactive oxygen species metabolic process | 6/189  | 101/18862 | 5.39E-04 | 9.56E-03 | 6.55E-03 | F2/HBB/PTK2B/HSP90AB1/TLR4/IFNG                                  |
| BP | GO:0002040 | sprouting angiogenesis                                           | 8/189  | 184/18862 | 5.46E-04 | 9.62E-03 | 6.59E-03 | HMOX1/VEGFB/MAP3K3/PTK2B/HDAC7/NOTCH1/TJP1/STARD13               |
| BP | GO:0006084 | acetyl-CoA metabolic process                                     | 4/189  | 38/18862  | 5.52E-04 | 9.62E-03 | 6.59E-03 | HMGCS1/PDK2/ACACB/PDK4                                           |
| BP | GO:0010742 | macrophage derived foam cell differentiation                     | 4/189  | 38/18862  | 5.52E-04 | 9.62E-03 | 6.59E-03 | EP300/ITGB3/PPARG/NR1H3                                          |
| BP | GO:0090077 | foam cell differentiation                                        | 4/189  | 38/18862  | 5.52E-04 | 9.62E-03 | 6.59E-03 | EP300/ITGB3/PPARG/NR1H3                                          |
| BP | GO:0051090 | regulation of DNA-binding transcription factor activity          | 13/189 | 444/18862 | 5.57E-04 | 9.66E-03 | 6.62E-03 | EP300/AR/HMOX1/BTK/ESR1/HCK/TRIM21/TLR4/ALK/PPARG/BTRC/PRKCB/SHH |
| BP | GO:0046637 | regulation of alpha-beta T cell differentiation                  | 5/189  | 67/18862  | 5.59E-04 | 9.66E-03 | 6.62E-03 | HLA-DRB1/RARA/IFNG/IL2/SHH                                       |
| BP | GO:0042116 | macrophage activation                                            | 6/189  | 102/18862 | 5.68E-04 | 9.75E-03 | 6.68E-03 | BPI/TLR4/IFNGR1/IFNG/CD74/NR1H3                                  |
| BP | GO:0007249 | I-kappaB kinase/NF-kappaB signaling                              | 10/189 | 282/18862 | 5.73E-04 | 9.79E-03 | 6.71E-03 | HMOX1/BTK/MAP3K3/ESR1/TRIM21/TLR4/HLA-DRB1/BTRC/PRKCB/CD74       |
| BP | GO:0045765 | regulation of angiogenesis                                       | 11/189 | 335/18862 | 5.83E-04 | 9.92E-03 | 6.80E-03 | HK2/HMOX1/VEGFB/PTK2B/F3/GTF2I/PPARG/PKG1/TJP1/PRKCB/THBS2       |
| BP | GO:0042063 | gliogenesis                                                      | 10/189 | 283/18862 | 5.89E-04 | 9.93E-03 | 6.81E-03 | F2/NF2/PTK2B/NSUN5/TLR4/IFNGR1/PPARG/NOTCH1/IFNG/SHH             |
| BP | GO:0097193 | intrinsic apoptotic signaling pathway                            | 10/189 | 283/18862 | 5.89E-04 | 9.93E-03 | 6.81E-03 | CUL1/EP300/HMOX1/MUC1/MSH2/PDK2/DAPK2/FHIT/SFN/CD74              |
| BP | GO:0006576 | cellular biogenic amine metabolic process                        | 6/189  | 103/18862 | 5.98E-04 | 1.00E-02 | 6.87E-03 | DHPS/PAH/SULT1A1/ODC1/PNMT/CHKA                                  |
| BP | GO:0034393 | positive regulation of smooth muscle cell apoptotic process      | 3/189  | 17/18862  | 6.07E-04 | 1.00E-02 | 6.87E-03 | PPARG/IFNG/STK4                                                  |

|    |           |                                                          |        |           |          |          |          |                                                                            |
|----|-----------|----------------------------------------------------------|--------|-----------|----------|----------|----------|----------------------------------------------------------------------------|
| BP | GO:006074 | mammary gland alveolus development                       | 3/189  | 17/18862  | 6.07E-04 | 1.00E-02 | 6.87E-03 | AR/ESR1/ERBB4                                                              |
| BP | GO:006137 | mammary gland lobule development                         | 3/189  | 17/18862  | 6.07E-04 | 1.00E-02 | 6.87E-03 | AR/ESR1/ERBB4                                                              |
| BP | GO:000637 | transcription initiation from RNA polymerase II promoter | 8/189  | 187/18862 | 6.08E-04 | 1.00E-02 | 6.87E-03 | RARG/AR/ESR1/PPARG/NOTCH1/RARA/TAF13/NR1H3                                 |
| BP | GO:000244 | production of molecular mediator of immune response      | 10/189 | 286/18862 | 6.39E-04 | 1.05E-02 | 7.19E-03 | HMOX1/BTK/MSH2/B2M/TLR4/HLA-DRB1/YY1/PARP3/CD74/IL2                        |
| BP | GO:003210 | negative regulation of response to external stimulus     | 12/189 | 394/18862 | 6.44E-04 | 1.05E-02 | 7.21E-03 | F2/TRIM21/ALOX12/FAP/HLA-DRB1/PPARG/NOTCH1/TNFAIP8L2/DPP4/SEMA4D/IL2/NR1H3 |
| BP | GO:002248 | negative regulation of cell-cell adhesion                | 8/189  | 189/18862 | 6.52E-04 | 1.06E-02 | 7.27E-03 | NF2/ALOX12/HLA-DRB1/NOTCH1/TNFAIP8L2/CD74/IL2/SHH                          |
| BP | GO:190370 | negative regulation of hemopoiesis                       | 6/189  | 105/18862 | 6.62E-04 | 1.07E-02 | 7.36E-03 | TLR4/RARA/HMGB3/CD74/IL2/SHH                                               |
| BP | GO:003089 | positive regulation of B cell proliferation              | 4/189  | 40/18862  | 6.73E-04 | 1.08E-02 | 7.44E-03 | VAV3/TLR4/CD74/IL2                                                         |
| BP | GO:190134 | regulation of vasculature development                    | 11/189 | 341/18862 | 6.75E-04 | 1.08E-02 | 7.44E-03 | HK2/HMOX1/VEGFB/PTK2B/F3/GTF2I/PPARG/PGK1/TJP1/PRKCB/THBS2                 |
| BP | GO:005502 | regulation of cardiac muscle tissue growth               | 5/189  | 70/18862  | 6.84E-04 | 1.10E-02 | 7.51E-03 | ERBB4/NOTCH1/YY1/G6PD/GLI1                                                 |
| BP | GO:007099 | neuron death                                             | 11/189 | 342/18862 | 6.91E-04 | 1.10E-02 | 7.55E-03 | HMOX1/PTK2B/HSP90AB1/MSH2/TLR4/FAS/NAE1/IFNG/XIAP/G6PD/DHCR24              |
| BP | GO:015015 | NA                                                       | 6/189  | 106/18862 | 6.96E-04 | 1.10E-02 | 7.57E-03 | RAC1/EPHA3/PTK2B/BCR/ARF6/FN1                                              |
| BP | GO:007027 | lymphocyte apoptotic process                             | 5/189  | 71/18862  | 7.30E-04 | 1.15E-02 | 7.91E-03 | BTK/DFFA/FAS/CD74/IL2                                                      |
| BP | GO:005073 | positive regulation of peptidyl-tyrosine phosphorylation | 8/189  | 193/18862 | 7.47E-04 | 1.17E-02 | 8.03E-03 | HBEGF/PTK2B/ERBB4/ITGB3/IFNG/SEMA4D/CD74/IL2                               |
| BP | GO:005086 | regulation of B cell activation                          | 8/189  | 193/18862 | 7.47E-04 | 1.17E-02 | 8.03E-03 | VAV3/BTK/MSH2/TLR4/HMGB3/PARP3/CD74/IL2                                    |
| BP | GO:190547 | regulation of protein localization to membrane           | 8/189  | 194/18862 | 7.73E-04 | 1.21E-02 | 8.27E-03 | AR/EPHA3/YWHAQ/IFNG/ARF6/YWHAH/SFN/NMT1                                    |

|    |            |                                                       |        |           |          |          |          |                                                                   |
|----|------------|-------------------------------------------------------|--------|-----------|----------|----------|----------|-------------------------------------------------------------------|
| BP | GO:0062197 | NA                                                    | 11/189 | 347/18862 | 7.79E-04 | 1.21E-02 | 8.29E-03 | XRCC6/MMP2/HMOX1/BTK/PDK2/TLR4/FAS/PPARG/APEX1/OXSR1/G6PD         |
| BP | GO:0046390 | ribose phosphate biosynthetic process                 | 8/189  | 195/18862 | 7.99E-04 | 1.23E-02 | 8.42E-03 | NME3/PAPSS1/PYGL/PDK2/ACACB/GART/G6PD/PDK4                        |
| BP | GO:0043535 | regulation of blood vessel endothelial cell migration | 7/189  | 150/18862 | 8.00E-04 | 1.23E-02 | 8.42E-03 | HMOX1/MAP3K3/HDAC7/ALOX12/PPARG/NOTCH1/STARD13                    |
| BP | GO:0050777 | negative regulation of immune response                | 7/189  | 150/18862 | 8.00E-04 | 1.23E-02 | 8.42E-03 | HMOX1/TRIM21/HLA-DRB1/PPARG/PARP3/IL2/NR1H3                       |
| BP | GO:0032963 | collagen metabolic process                            | 6/189  | 109/18862 | 8.06E-04 | 1.23E-02 | 8.44E-03 | F2/MMP2/CYP7A1/FAP/PPARG/MMP1                                     |
| BP | GO:0048806 | genitalia development                                 | 4/189  | 42/18862  | 8.12E-04 | 1.23E-02 | 8.44E-03 | AR/ESR1/SRD5A2/SHH                                                |
| BP | GO:1902622 | regulation of neutrophil migration                    | 4/189  | 42/18862  | 8.12E-04 | 1.23E-02 | 8.44E-03 | RAC1/DAPK2/DPP4/CD74                                              |
| BP | GO:0043122 | regulation of I-kappaB kinase/NF-kappaB signaling     | 9/189  | 244/18862 | 8.15E-04 | 1.23E-02 | 8.44E-03 | HMOX1/MAP3K3/ESR1/TRIM21/TLR4/HLA-DRB1/BTRC/PRKCB/CD74            |
| BP | GO:0001558 | regulation of cell growth                             | 12/189 | 406/18862 | 8.36E-04 | 1.26E-02 | 8.62E-03 | F2/HBEGF/PTK2B/PPP2R1A/EXOSC9/PPARG/YY1/SFN/G6PD/FN1/SEMA4D/IL2   |
| BP | GO:0002902 | regulation of B cell apoptotic process                | 3/189  | 19/18862  | 8.52E-04 | 1.27E-02 | 8.73E-03 | BTK/CD74/IL2                                                      |
| BP | GO:0002697 | regulation of immune effector process                 | 13/189 | 465/18862 | 8.54E-04 | 1.27E-02 | 8.73E-03 | F2/HMOX1/BTK/MSH2/B2M/TLR4/HLA-DRB1/RARA/IFNG/C1R/PARP3/CD74/IL2  |
| BP | GO:0044843 | cell cycle G1/S phase transition                      | 10/189 | 298/18862 | 8.75E-04 | 1.30E-02 | 8.91E-03 | CUL1/EP300/MUC1/SEN2/WEE1/RPA3/APEX1/SFN/GLI1/POLA1               |
| BP | GO:0051054 | positive regulation of DNA metabolic process          | 8/189  | 198/18862 | 8.82E-04 | 1.31E-02 | 8.95E-03 | POT1/PTK2B/HSP90AB1/MSH2/HNRNPA2B1/PARN/PARP3/IL2                 |
| BP | GO:0070266 | apoptotic process                                     | 4/189  | 43/18862  | 8.88E-04 | 1.31E-02 | 8.98E-03 | PYGL/ITPK1/TLR4/FAS                                               |
| BP | GO:0051052 | regulation of DNA metabolic process                   | 11/189 | 353/18862 | 8.95E-04 | 1.31E-02 | 9.01E-03 | POT1/DFFA/PTK2B/HSP90AB1/MSH2/SMG5/HNRNPA2B1/PARN/PPARG/PARP3/IL2 |
| BP | GO:0006635 | fatty acid beta-oxidation                             | 5/189  | 75/18862  | 9.37E-04 | 1.36E-02 | 9.33E-03 | HSD17B4/ACADVL/ACACB/ECI2/ECHS1                                   |

|    |            |                                                                                                     |        |           |          |          |          |                                                                       |
|----|------------|-----------------------------------------------------------------------------------------------------|--------|-----------|----------|----------|----------|-----------------------------------------------------------------------|
| BP | GO:0046902 | regulation of mitochondrial membrane permeability                                                   | 5/189  | 75/18862  | 9.37E-04 | 1.36E-02 | 9.33E-03 | HK2/YWHAQ/YWHAH/SFN/NMT1                                              |
| BP | GO:1902930 | regulation of alcohol biosynthetic process                                                          | 5/189  | 75/18862  | 9.37E-04 | 1.36E-02 | 9.33E-03 | HMGCS1/PTK2B/CYP7A1/ACACB/GGPS1                                       |
| BP | GO:0042771 | intrinsic apoptotic signaling pathway in response to DNA damage by p53 class mediator               | 4/189  | 44/18862  | 9.69E-04 | 1.39E-02 | 9.50E-03 | EP300/MUC1/MSH2/CD74                                                  |
| BP | GO:0046427 | positive regulation of JAK-STAT cascade                                                             | 4/189  | 44/18862  | 9.69E-04 | 1.39E-02 | 9.50E-03 | F2/PTK2B/ERBB4/NOTCH1                                                 |
| BP | GO:0060421 | positive regulation of heart growth                                                                 | 4/189  | 44/18862  | 9.69E-04 | 1.39E-02 | 9.50E-03 | ACACB/ERBB4/NOTCH1/GLI1                                               |
| BP | GO:1901028 | regulation of mitochondrial outer membrane permeabilization involved in apoptotic signaling pathway | 4/189  | 44/18862  | 9.69E-04 | 1.39E-02 | 9.50E-03 | YWHAQ/YWHAH/SFN/NMT1                                                  |
| BP | GO:0051098 | regulation of binding                                                                               | 11/189 | 357/18862 | 9.81E-04 | 1.40E-02 | 9.57E-03 | EP300/HMOX1/PTPRF/TRIM21/HSP90AB1/SEN2/B2M/PPARG/RARA/IFNG/STK4       |
| BP | GO:0030539 | male genitalia development                                                                          | 3/189  | 20/18862  | 9.96E-04 | 1.41E-02 | 9.64E-03 | AR/SRD5A2/SHH                                                         |
| BP | GO:0060444 | branching involved in mammary gland duct morphogenesis                                              | 3/189  | 20/18862  | 9.96E-04 | 1.41E-02 | 9.64E-03 | AR/ESR1/BTRC                                                          |
| BP | GO:0090049 | regulation of cell migration involved in sprouting angiogenesis                                     | 5/189  | 77/18862  | 1.06E-03 | 1.49E-02 | 1.02E-02 | HMOX1/MAP3K3/HDAC7/NOTCH1/STARD13                                     |
| BP | GO:0060326 | cell chemotaxis                                                                                     | 10/189 | 306/18862 | 1.07E-03 | 1.50E-02 | 1.03E-02 | HBEGF/VAV3/VEGFB/RAC1/PTK2B/DAPK2/NOTCH1/DPP4/OXSR1/CD74              |
| BP | GO:0031349 | positive regulation of defense response                                                             | 11/189 | 361/18862 | 1.07E-03 | 1.50E-02 | 1.03E-02 | CUL1/EP300/XRCC6/BTK/MUC1/HCK/SKP1/TLR4/IFNG/BTRC/IL2                 |
| BP | GO:1901987 | regulation of cell cycle phase transition                                                           | 13/189 | 478/18862 | 1.10E-03 | 1.53E-02 | 1.05E-02 | CUL1/EP300/MUC1/PPP2R1A/SEN2/SKP1/WEE1/NAE1/BTRC/APEX1/SFN/NDC80/GLI1 |
| BP | GO:0007093 | mitotic cell cycle checkpoint                                                                       | 7/189  | 159/18862 | 1.13E-03 | 1.56E-02 | 1.07E-02 | EP300/MUC1/MSH2/WEE1/NAE1/SFN/NDC80                                   |

|    |            |                                                                    |        |           |          |          |          |                                                                            |
|----|------------|--------------------------------------------------------------------|--------|-----------|----------|----------|----------|----------------------------------------------------------------------------|
| BP | GO:0030100 | regulation of endocytosis                                          | 8/189  | 206/18862 | 1.14E-03 | 1.57E-02 | 1.08E-02 | RAC1/EPHA3/B2M/ITGB3/MAGI2/PPARG/ARF6/NR1H3                                |
| BP | GO:0031648 | protein destabilization                                            | 4/189  | 46/18862  | 1.15E-03 | 1.57E-02 | 1.08E-02 | EP300/TRIM21/SEN2/BTRC                                                     |
| BP | GO:0048146 | positive regulation of fibroblast proliferation                    | 4/189  | 46/18862  | 1.15E-03 | 1.57E-02 | 1.08E-02 | ESR1/S100A6/FN1/CD74                                                       |
| BP | GO:0060562 | epithelial tube morphogenesis                                      | 10/189 | 309/18862 | 1.15E-03 | 1.57E-02 | 1.08E-02 | RARG/AR/ESR1/ALOX12/NOTCH1/ZIC3/BTRC/STK4/STARD13/SHH                      |
| BP | GO:0002429 | immune response-activating cell surface receptor signaling pathway | 13/189 | 481/18862 | 1.16E-03 | 1.57E-02 | 1.08E-02 | CUL1/EP300/VAV3/BTK/MUC1/RAC1/HCK/FCGR2A/HSP90AB1/SKP1/HLA-DRB1/BTRC/PRKCB |
| BP | GO:0002757 | immune response-activating signal transduction                     | 13/189 | 481/18862 | 1.16E-03 | 1.57E-02 | 1.08E-02 | CUL1/EP300/VAV3/BTK/MUC1/RAC1/HCK/FCGR2A/HSP90AB1/SKP1/HLA-DRB1/BTRC/PRKCB |
| BP | GO:0051960 | regulation of nervous system development                           | 12/189 | 422/18862 | 1.16E-03 | 1.57E-02 | 1.08E-02 | F2/RARG/NF2/B2M/NSUN5/PPARG/NOTCH1/IFNG/YWHAH/FN1/SEMA4D/SHH               |
| BP | GO:0030111 | regulation of Wnt signaling pathway                                | 11/189 | 365/18862 | 1.17E-03 | 1.58E-02 | 1.08E-02 | ESR1/PPP2R1A/SEN2/CSNK1G2/NFATC1/NOTCH1/BTRC/STK4/XIAP/GLI1/SHH            |
| BP | GO:0002312 | B cell activation involved in immune response                      | 5/189  | 79/18862  | 1.19E-03 | 1.59E-02 | 1.09E-02 | PTK2B/MSH2/TLR4/PARP3/IL2                                                  |
| BP | GO:0048145 | regulation of fibroblast proliferation                             | 5/189  | 79/18862  | 1.19E-03 | 1.59E-02 | 1.09E-02 | ESR1/PPARG/S100A6/FN1/CD74                                                 |
| BP | GO:0007159 | leukocyte cell-cell adhesion                                       | 11/189 | 366/18862 | 1.20E-03 | 1.59E-02 | 1.09E-02 | RAC1/MSN/HLA-DRB1/RARA/IFNG/TNFAIP8L2/DPP4/SEMA4D/CD74/IL2/SHH             |
| BP | GO:0050727 | regulation of inflammatory response                                | 11/189 | 366/18862 | 1.20E-03 | 1.59E-02 | 1.09E-02 | BTK/ESR1/HCK/TLR4/HLA-DRB1/PPARG/IFNG/TNFAIP8L2/XIAP/IL2/NR1H3             |
| BP | GO:0002833 | positive regulation of response to biotic stimulus                 | 9/189  | 258/18862 | 1.20E-03 | 1.59E-02 | 1.09E-02 | CUL1/EP300/XRCC6/MUC1/HCK/SKP1/TLR4/HLA-DRB1/BTRC                          |
| BP | GO:0008637 | apoptotic mitochondrial changes                                    | 6/189  | 118/18862 | 1.22E-03 | 1.61E-02 | 1.10E-02 | HK2/YWHAQ/ERBB4/YWHAH/SFN/NMT1                                             |
| BP | GO:0010712 | regulation of collagen metabolic process                           | 4/189  | 47/18862  | 1.24E-03 | 1.61E-02 | 1.11E-02 | F2/CYP7A1/FAP/PPARG                                                        |

|    |            |                                                       |       |           |          |          |          |                                                |
|----|------------|-------------------------------------------------------|-------|-----------|----------|----------|----------|------------------------------------------------|
| BP | GO:003572  | interleukin-12-mediated signaling pathway             | 4/189 | 47/18862  | 1.24E-03 | 1.61E-02 | 1.11E-02 | MTAP/MSN/HNRNPA2B1/IFNG                        |
| BP | GO:0120163 | negative regulation of cold-induced thermogenesis     | 4/189 | 47/18862  | 1.24E-03 | 1.61E-02 | 1.11E-02 | ACVR2B/TLR4/NOTCH1/NR1H3                       |
| BP | GO:0002703 | regulation of leukocyte mediated immunity             | 8/189 | 209/18862 | 1.25E-03 | 1.61E-02 | 1.11E-02 | HMOX1/BTK/MSH2/B2M/TLR4/HLA-DRB1/PARP3/IL2     |
| BP | GO:0010833 | telomere maintenance via telomere lengthening         | 5/189 | 80/18862  | 1.25E-03 | 1.61E-02 | 1.11E-02 | POT1/HSP90AB1/SMG5/HNRNPA2B1/PARN              |
| BP | GO:0014032 | neural crest cell development                         | 5/189 | 80/18862  | 1.25E-03 | 1.61E-02 | 1.11E-02 | ERBB4/ANXA6/FN1/SEMA4D/SHH                     |
| BP | GO:0048144 | fibroblast proliferation                              | 5/189 | 80/18862  | 1.25E-03 | 1.61E-02 | 1.11E-02 | ESR1/PPARG/S100A6/FN1/CD74                     |
| BP | GO:0001894 | tissue homeostasis                                    | 9/189 | 260/18862 | 1.27E-03 | 1.63E-02 | 1.11E-02 | RAC1/PTK2B/B2M/TLR4/ITGB3/NOTCH1/TJP1/ALB/PDK4 |
| BP | GO:0002758 | innate immune response-activating signal transduction | 6/189 | 119/18862 | 1.27E-03 | 1.63E-02 | 1.11E-02 | CUL1/EP300/MUC1/HCK/SKP1/BTRC                  |
| BP | GO:0006006 | glucose metabolic process                             | 8/189 | 210/18862 | 1.29E-03 | 1.63E-02 | 1.12E-02 | HK2/EP300/DCXR/PDK2/ACACB/PGK1/G6PD/PDK4       |
| BP | GO:0010001 | glial cell differentiation                            | 8/189 | 210/18862 | 1.29E-03 | 1.63E-02 | 1.12E-02 | F2/NSUN5/TLR4/IFNGR1/PPARG/NOTCH1/IFNG/SHH     |
| BP | GO:0009308 | amine metabolic process                               | 7/189 | 163/18862 | 1.30E-03 | 1.64E-02 | 1.13E-02 | DHPS/PAH/SULT1A1/ODC1/PNMT/AOC3/CHKA           |
| BP | GO:0010888 | negative regulation of lipid storage                  | 3/189 | 22/18862  | 1.33E-03 | 1.67E-02 | 1.14E-02 | ITGB3/PPARG/NR1H3                              |
| BP | GO:0022617 | extracellular matrix disassembly                      | 5/189 | 81/18862  | 1.33E-03 | 1.67E-02 | 1.14E-02 | MMP2/BMP1/FAP/MMP1/DPP4                        |
| BP | GO:0045540 | regulation of cholesterol biosynthetic process        | 4/189 | 48/18862  | 1.35E-03 | 1.67E-02 | 1.14E-02 | HMGCS1/CYP7A1/ACACB/GGPS1                      |
| BP | GO:0051204 | protein insertion into mitochondrial membrane         | 4/189 | 48/18862  | 1.35E-03 | 1.67E-02 | 1.14E-02 | YWHAQ/YWHAH/SFN/NMT1                           |
| BP | GO:0106118 | regulation of sterol biosynthetic process             | 4/189 | 48/18862  | 1.35E-03 | 1.67E-02 | 1.14E-02 | HMGCS1/CYP7A1/ACACB/GGPS1                      |



|    |            |                                                               |        |           |          |          |          |                                                     |
|----|------------|---------------------------------------------------------------|--------|-----------|----------|----------|----------|-----------------------------------------------------|
| BP | GO:1904894 | positive regulation of STAT cascade                           | 4/189  | 48/18862  | 1.35E-03 | 1.67E-02 | 1.14E-02 | F2/PTK2B/ERBB4/NOTCH1                               |
| BP | GO:0050870 | positive regulation of T cell activation                      | 8/189  | 212/18862 | 1.37E-03 | 1.69E-02 | 1.16E-02 | RAC1/HLA-DRB1/RARA/IFNG/DPP4/CD74/IL2/SHH           |
| BP | GO:0072331 | signal transduction by p53 class mediator                     | 9/189  | 263/18862 | 1.38E-03 | 1.70E-02 | 1.16E-02 | EP300/MUC1/MSH2/PDK2/RPA3/TAF13/FHIT/SFN/CD74       |
| BP | GO:0009165 | nucleotide biosynthetic process                               | 9/189  | 264/18862 | 1.41E-03 | 1.73E-02 | 1.19E-02 | RRM1/NME3/DTYMK/PAPSS1/PDK2/ACACB/GART/DCTD/PDK4    |
| BP | GO:0019218 | regulation of steroid metabolic process                       | 6/189  | 122/18862 | 1.45E-03 | 1.76E-02 | 1.21E-02 | ACADVL/HMGCS1/CYP7A1/ACACB/IFNG/GGPS1               |
| BP | GO:0046638 | positive regulation of alpha-beta T cell differentiation      | 4/189  | 49/18862  | 1.45E-03 | 1.76E-02 | 1.21E-02 | HLA-DRB1/RARA/IFNG/SHH                              |
| BP | GO:0071349 | cellular response to interleukin-12                           | 4/189  | 49/18862  | 1.45E-03 | 1.76E-02 | 1.21E-02 | MTAP/MSN/HNRNPA2B1/IFNG                             |
| BP | GO:0071622 | regulation of granulocyte chemotaxis                          | 4/189  | 49/18862  | 1.45E-03 | 1.76E-02 | 1.21E-02 | RAC1/DAPK2/DPP4/CD74                                |
| BP | GO:0048638 | regulation of developmental growth                            | 10/189 | 319/18862 | 1.46E-03 | 1.76E-02 | 1.21E-02 | AR/ACACB/ERBB4/NOTCH1/YY1/STK4/G6PD/FN1/SEMA4D/GLI1 |
| BP | GO:0032092 | positive regulation of protein binding                        | 5/189  | 83/18862  | 1.48E-03 | 1.78E-02 | 1.22E-02 | EP300/TRIM21/HSP90AB1/B2M/STK4                      |
| BP | GO:0048864 | stem cell development                                         | 5/189  | 83/18862  | 1.48E-03 | 1.78E-02 | 1.22E-02 | ERBB4/ANXA6/FN1/SEMA4D/SHH                          |
| BP | GO:1903409 | reactive oxygen species biosynthetic process                  | 6/189  | 123/18862 | 1.51E-03 | 1.80E-02 | 1.24E-02 | HBB/RAC1/PTK2B/HSP90AB1/TLR4/IFNG                   |
| BP | GO:1901293 | nucleoside phosphate biosynthetic process                     | 9/189  | 267/18862 | 1.53E-03 | 1.82E-02 | 1.25E-02 | RRM1/NME3/DTYMK/PAPSS1/PDK2/ACACB/GART/DCTD/PDK4    |
| BP | GO:0002718 | regulation of cytokine production involved in immune response | 5/189  | 84/18862  | 1.56E-03 | 1.85E-02 | 1.27E-02 | HMOX1/BTK/B2M/TLR4/CD74                             |
| BP | GO:0045668 | negative regulation of osteoblast differentiation             | 4/189  | 50/18862  | 1.57E-03 | 1.85E-02 | 1.27E-02 | HDAC7/PPARG/NOTCH1/SEMA4D                           |
| BP | GO:0070671 | response to interleukin-12                                    | 4/189  | 50/18862  | 1.57E-03 | 1.85E-02 | 1.27E-02 | MTAP/MSN/HNRNPA2B1/IFNG                             |

|    |            |                                                               |        |           |          |          |          |                                                                  |
|----|------------|---------------------------------------------------------------|--------|-----------|----------|----------|----------|------------------------------------------------------------------|
| BP | GO:0038095 | Fc-epsilon receptor signaling pathway                         | 7/189  | 169/18862 | 1.60E-03 | 1.88E-02 | 1.29E-02 | CUL1/VAV3/BTK/RAC1/SKP1/NFATC1/BTRC                              |
| BP | GO:190190  | regulation of mitotic cell cycle phase transition             | 12/189 | 439/18862 | 1.63E-03 | 1.89E-02 | 1.30E-02 | CUL1/EP300/MUC1/PPP2R1A/SEN2/SKP1/WEE1/NAE1/BTRC/APEX1/SFN/NDC80 |
| BP | GO:0010810 | regulation of cell-substrate adhesion                         | 8/189  | 218/18862 | 1.63E-03 | 1.89E-02 | 1.30E-02 | NF2/RAC1/EPHA3/PTK2B/ATXN3/NOTCH1/STK4/FN1                       |
| BP | GO:0042445 | hormone metabolic process                                     | 8/189  | 218/18862 | 1.63E-03 | 1.89E-02 | 1.30E-02 | HSD17B4/ESR1/TTR/ADH1C/SULT1A1/CYP17A1/SRD5A2/SHH                |
| BP | GO:0071695 | anatomical structure maturation                               | 8/189  | 218/18862 | 1.63E-03 | 1.89E-02 | 1.30E-02 | MMP2/BTK/RND1/PTK2B/PPARG/ANG/G6PD/SEMA4D                        |
| BP | GO:0034109 | homotypic cell-cell adhesion                                  | 5/189  | 85/18862  | 1.64E-03 | 1.89E-02 | 1.30E-02 | HBB/ALOX12/ITGB3/DSG2/FN1                                        |
| BP | GO:0042509 | regulation of tyrosine phosphorylation of STAT protein        | 5/189  | 85/18862  | 1.64E-03 | 1.89E-02 | 1.30E-02 | NF2/PPP2R1A/ERBB4/IFNG/IL2                                       |
| BP | GO:0046889 | positive regulation of lipid biosynthetic process             | 5/189  | 85/18862  | 1.64E-03 | 1.89E-02 | 1.30E-02 | FABP3/CYP7A1/IFNG/CD74/NR1H3                                     |
| BP | GO:0006909 | phagocytosis                                                  | 11/189 | 381/18862 | 1.65E-03 | 1.89E-02 | 1.30E-02 | VAV3/RAC1/HCK/FCGR2A/HSP90AB1/TLR4/ITGB3/PPARG/RARA/IFNG/NR1H3   |
| BP | GO:0043277 | apoptotic cell clearance                                      | 4/189  | 51/18862  | 1.69E-03 | 1.92E-02 | 1.32E-02 | RAC1/ITGB3/RARA/NR1H3                                            |
| BP | GO:0043370 | regulation of CD4-positive, alpha-beta T cell differentiation | 4/189  | 51/18862  | 1.69E-03 | 1.92E-02 | 1.32E-02 | HLA-DRB1/RARA/IFNG/IL2                                           |
| BP | GO:0097300 | programmed necrotic cell death                                | 4/189  | 51/18862  | 1.69E-03 | 1.92E-02 | 1.32E-02 | PYGL/ITPK1/TLR4/FAS                                              |
| BP | GO:0003002 | regionalization                                               | 10/189 | 326/18862 | 1.71E-03 | 1.94E-02 | 1.33E-02 | RARG/EP300/AR/ACVR2B/SEN2/NOTCH1/ZIC3/YY1/GLI1/SHH               |
| BP | GO:0032925 | regulation of activin receptor signaling pathway              | 3/189  | 24/18862  | 1.72E-03 | 1.94E-02 | 1.33E-02 | ACVR2B/MAGI2/SHH                                                 |
| BP | GO:0090023 | positive regulation of neutrophil chemotaxis                  | 3/189  | 24/18862  | 1.72E-03 | 1.94E-02 | 1.33E-02 | RAC1/DAPK2/CD74                                                  |
| BP | GO:0055072 | iron ion homeostasis                                          | 5/189  | 86/18862  | 1.73E-03 | 1.95E-02 | 1.34E-02 | CUL1/HMOX1/SKP1/B2M/IFNG                                         |

|    |            |                                                   |        |           |          |          |          |                                                                   |
|----|------------|---------------------------------------------------|--------|-----------|----------|----------|----------|-------------------------------------------------------------------|
| BP | GO:0006979 | response to oxidative stress                      | 12/189 | 444/18862 | 1.79E-03 | 2.00E-02 | 1.37E-02 | MMP2/HMOX1/BTK/HBB/PTK2B/PDK2/TLR4/CYP2E1/APEX1/OXSR1/G6PD/DHCR24 |
| BP | GO:0008361 | regulation of cell size                           | 7/189  | 173/18862 | 1.83E-03 | 2.04E-02 | 1.40E-02 | RARG/VAV3/RAC1/HSP90AB1/MSN/FN1/SEMA4D                            |
| BP | GO:0002576 | platelet degranulation                            | 6/189  | 128/18862 | 1.85E-03 | 2.05E-02 | 1.40E-02 | VEGFB/PSAP/ITGB3/ALB/FN1/ABCC4                                    |
| BP | GO:0032479 | regulation of type I interferon production        | 6/189  | 128/18862 | 1.85E-03 | 2.05E-02 | 1.40E-02 | EP300/XRCC6/TRIM21/TLR4/YY1/POLA1                                 |
| BP | GO:0045667 | regulation of osteoblast differentiation          | 6/189  | 128/18862 | 1.85E-03 | 2.05E-02 | 1.40E-02 | HDAC7/ACVR2B/PPARG/NOTCH1/SEMA4D/GLI1                             |
| BP | GO:0043254 | regulation of protein complex assembly            | 12/189 | 446/18862 | 1.85E-03 | 2.05E-02 | 1.40E-02 | EP300/ESR1/RAC1/HCK/PTK2B/MSN/TLR4/PEX5/RPA3/MMP1/IFNG/ARF6       |
| BP | GO:0000082 | G1/S transition of mitotic cell cycle             | 9/189  | 275/18862 | 1.87E-03 | 2.05E-02 | 1.40E-02 | CUL1/EP300/MUC1/SEN2/WEE1/RPA3/APEX1/SFN/POLA1                    |
| BP | GO:0071214 | cellular response to abiotic stimulus             | 10/189 | 330/18862 | 1.87E-03 | 2.05E-02 | 1.40E-02 | EP300/XRCC6/MMP2/RAC1/TLR4/FAS/MMP1/YY1/OXSR1/NMT1                |
| BP | GO:0104004 | cellular response to environmental stimulus       | 10/189 | 330/18862 | 1.87E-03 | 2.05E-02 | 1.40E-02 | EP300/XRCC6/MMP2/RAC1/TLR4/FAS/MMP1/YY1/OXSR1/NMT1                |
| BP | GO:0001649 | osteoblast differentiation                        | 8/189  | 223/18862 | 1.88E-03 | 2.05E-02 | 1.40E-02 | HSD17B4/HDAC7/ACVR2B/PPARG/NOTCH1/SEMA4D/GLI1/SHH                 |
| BP | GO:0045089 | positive regulation of innate immune response     | 8/189  | 223/18862 | 1.88E-03 | 2.05E-02 | 1.40E-02 | CUL1/EP300/XRCC6/MUC1/HCK/SKP1/TLR4/BTRC                          |
| BP | GO:0022409 | positive regulation of cell-cell adhesion         | 9/189  | 276/18862 | 1.92E-03 | 2.05E-02 | 1.41E-02 | RAC1/HLA-DRB1/RARA/TJP1/IFNG/DPP4/CD74/IL2/SHH                    |
| BP | GO:0031098 | stress-activated protein kinase signaling cascade | 9/189  | 276/18862 | 1.92E-03 | 2.05E-02 | 1.41E-02 | CUL1/MAP3K3/PTK2B/IGF1R/SKP1/TLR4/FAS/BTRC/STK4                   |
| BP | GO:0007260 | tyrosine phosphorylation of STAT protein          | 5/189  | 88/18862  | 1.92E-03 | 2.05E-02 | 1.41E-02 | NF2/PPP2R1A/ERBB4/IFNG/IL2                                        |
| BP | GO:0032606 | type I interferon production                      | 6/189  | 129/18862 | 1.92E-03 | 2.05E-02 | 1.41E-02 | EP300/XRCC6/TRIM21/TLR4/YY1/POLA1                                 |
| BP | GO:0000302 | response to reactive oxygen species               | 8/189  | 224/18862 | 1.93E-03 | 2.05E-02 | 1.41E-02 | MMP2/HMOX1/BTK/HBB/PTK2B/PDK2/CYP2E1/APEX1                        |

|    |            |                                                                 |       |           |          |          |          |                                                |
|----|------------|-----------------------------------------------------------------|-------|-----------|----------|----------|----------|------------------------------------------------|
| BP | GO:0001783 | B cell apoptotic process                                        | 3/189 | 25/18862  | 1.94E-03 | 2.05E-02 | 1.41E-02 | BTK/CD74/IL2                                   |
| BP | GO:0008211 | glucocorticoid metabolic process                                | 3/189 | 25/18862  | 1.94E-03 | 2.05E-02 | 1.41E-02 | YWHAH/CYP17A1/SERPINA6                         |
| BP | GO:0090151 | establishment of protein localization to mitochondrial membrane | 4/189 | 53/18862  | 1.95E-03 | 2.05E-02 | 1.41E-02 | YWHAQ/YWHAH/SFN/NMT1                           |
| BP | GO:0045766 | positive regulation of angiogenesis                             | 7/189 | 175/18862 | 1.95E-03 | 2.05E-02 | 1.41E-02 | HK2/HMOX1/VEGFB/PTK2B/F3/TJP1/PRKCB            |
| BP | GO:0048771 | tissue remodeling                                               | 7/189 | 175/18862 | 1.95E-03 | 2.05E-02 | 1.41E-02 | MMP2/RAC1/PTK2B/ACVR2B/ITGB3/PDK4/IL2          |
| BP | GO:0051897 | positive regulation of protein kinase B signaling               | 7/189 | 175/18862 | 1.95E-03 | 2.05E-02 | 1.41E-02 | HBEGF/ESR1/RAC1/IGF1R/HSP90AB1/F3/ERBB4        |
| BP | GO:1904018 | positive regulation of vasculature development                  | 7/189 | 175/18862 | 1.95E-03 | 2.05E-02 | 1.41E-02 | HK2/HMOX1/VEGFB/PTK2B/F3/TJP1/PRKCB            |
| BP | GO:0060560 | developmental growth involved in morphogenesis                  | 8/189 | 225/18862 | 1.99E-03 | 2.09E-02 | 1.43E-02 | RARG/ESR1/HSP90AB1/MAGI2/NOTCH1/FN1/SEMA4D/SHH |
| BP | GO:0030595 | leukocyte chemotaxis                                            | 8/189 | 226/18862 | 2.04E-03 | 2.14E-02 | 1.47E-02 | VAV3/VEGFB/RAC1/PTK2B/DAPK2/DPP4/OXSR1/CD74    |
| BP | GO:0072329 | monocarboxylic acid catabolic process                           | 6/189 | 131/18862 | 2.08E-03 | 2.16E-02 | 1.48E-02 | HSD17B4/ACADVL/DCXR/ACACB/ECI2/ECHS1           |
| BP | GO:0002712 | regulation of B cell mediated immunity                          | 4/189 | 54/18862  | 2.09E-03 | 2.16E-02 | 1.48E-02 | BTK/MSH2/PARP3/IL2                             |
| BP | GO:0002889 | regulation of immunoglobulin mediated immune response           | 4/189 | 54/18862  | 2.09E-03 | 2.16E-02 | 1.48E-02 | BTK/MSH2/PARP3/IL2                             |
| BP | GO:0016447 | somatic recombination of immunoglobulin gene segments           | 4/189 | 54/18862  | 2.09E-03 | 2.16E-02 | 1.48E-02 | MSH2/YY1/PARP3/IL2                             |
| BP | GO:0046622 | positive regulation of organ growth                             | 4/189 | 54/18862  | 2.09E-03 | 2.16E-02 | 1.48E-02 | ACACB/ERBB4/NOTCH1/GLI1                        |
| BP | GO:0014033 | neural crest cell differentiation                               | 5/189 | 90/18862  | 2.12E-03 | 2.17E-02 | 1.48E-02 | ERBB4/ANXA6/FN1/SEMA4D/SHH                     |

|    |            |                                                                |       |           |          |          |          |                                              |
|----|------------|----------------------------------------------------------------|-------|-----------|----------|----------|----------|----------------------------------------------|
| BP | GO:0014068 | positive regulation of phosphatidylinositol 3-kinase signaling | 5/189 | 90/18862  | 2.12E-03 | 2.17E-02 | 1.48E-02 | F2/IGF1R/ERBB4/FN1/SEMA4D                    |
| BP | GO:0090559 | regulation of membrane permeability                            | 5/189 | 90/18862  | 2.12E-03 | 2.17E-02 | 1.48E-02 | HK2/YWHAQ/YWHAH/SFN/NMT1                     |
| BP | GO:0006165 | nucleoside diphosphate phosphorylation                         | 6/189 | 132/18862 | 2.16E-03 | 2.20E-02 | 1.51E-02 | HK2/EP300/NME3/DTYMK/PGK1/IFNG               |
| BP | GO:0019883 | antigen processing and presentation of endogenous antigen      | 3/189 | 26/18862  | 2.17E-03 | 2.20E-02 | 1.51E-02 | B2M/HLA-DRB1/CD74                            |
| BP | GO:0061082 | myeloid leukocyte cytokine production                          | 3/189 | 26/18862  | 2.17E-03 | 2.20E-02 | 1.51E-02 | HMOX1/TLR4/CD74                              |
| BP | GO:0050810 | regulation of steroid biosynthetic process                     | 5/189 | 91/18862  | 2.22E-03 | 2.24E-02 | 1.54E-02 | HMGCS1/CYP7A1/ACACB/IFNG/GGPS1               |
| BP | GO:0045620 | negative regulation of lymphocyte differentiation              | 4/189 | 55/18862  | 2.24E-03 | 2.24E-02 | 1.54E-02 | HMGB3/CD74/IL2/SHH                           |
| BP | GO:0097345 | mitochondrial outer membrane permeabilization                  | 4/189 | 55/18862  | 2.24E-03 | 2.24E-02 | 1.54E-02 | YWHAQ/YWHAH/SFN/NMT1                         |
| BP | GO:0002687 | positive regulation of leukocyte migration                     | 6/189 | 133/18862 | 2.24E-03 | 2.24E-02 | 1.54E-02 | VEGFB/RAC1/PTK2B/DAPK2/OXSR1/CD74            |
| BP | GO:0046939 | nucleotide phosphorylation                                     | 6/189 | 133/18862 | 2.24E-03 | 2.24E-02 | 1.54E-02 | HK2/EP300/NME3/DTYMK/PGK1/IFNG               |
| BP | GO:0051402 | neuron apoptotic process                                       | 8/189 | 230/18862 | 2.28E-03 | 2.28E-02 | 1.56E-02 | HMOX1/PTK2B/HSP90AB1/MSH2/FAS/NAE1/XIAP/G6PD |
| BP | GO:0055017 | cardiac muscle tissue growth                                   | 5/189 | 92/18862  | 2.33E-03 | 2.32E-02 | 1.59E-02 | ERBB4/NOTCH1/YY1/G6PD/GLI1                   |
| BP | GO:0010883 | regulation of lipid storage                                    | 4/189 | 56/18862  | 2.39E-03 | 2.37E-02 | 1.62E-02 | ACACB/ITGB3/PPARG/NR1H3                      |
| BP | GO:0003401 | axis elongation                                                | 3/189 | 27/18862  | 2.43E-03 | 2.37E-02 | 1.62E-02 | ESR1/MAGI2/SHH                               |
| BP | GO:0035116 | embryonic hindlimb morphogenesis                               | 3/189 | 27/18862  | 2.43E-03 | 2.37E-02 | 1.62E-02 | RARG/NOTCH1/SHH                              |

|    |            |                                                            |        |           |          |          |          |                                                                          |
|----|------------|------------------------------------------------------------|--------|-----------|----------|----------|----------|--------------------------------------------------------------------------|
| BP | GO:0045606 | positive regulation of epidermal cell differentiation      | 3/189  | 27/18862  | 2.43E-03 | 2.37E-02 | 1.62E-02 | NCOA3/NOTCH1/SFN                                                         |
| BP | GO:0071624 | positive regulation of granulocyte chemotaxis              | 3/189  | 27/18862  | 2.43E-03 | 2.37E-02 | 1.62E-02 | RAC1/DAPK2/CD74                                                          |
| BP | GO:0043123 | positive regulation of I-kappaB kinase/NF-kappaB signaling | 7/189  | 182/18862 | 2.43E-03 | 2.37E-02 | 1.62E-02 | HMOX1/MAP3K3/TRIM21/TLR4/HLA-DRB1/PRKCB/CD74                             |
| BP | GO:0006869 | lipid transport                                            | 12/189 | 461/18862 | 2.44E-03 | 2.37E-02 | 1.62E-02 | FABP3/PSAP/CYP7A1/ACACB/ITGB3/PPARG/SERPINA5/CHKA/NPC1L1/ABCC4/NR1H3/SHH |
| BP | GO:0002042 | cell migration involved in sprouting angiogenesis          | 5/189  | 93/18862  | 2.44E-03 | 2.37E-02 | 1.62E-02 | HMOX1/MAP3K3/HDAC7/NOTCH1/STARD13                                        |
| BP | GO:0002367 | cytokine production involved in immune response            | 5/189  | 93/18862  | 2.44E-03 | 2.37E-02 | 1.62E-02 | HMOX1/BTK/B2M/TLR4/CD74                                                  |
| BP | GO:0014013 | regulation of gliogenesis                                  | 5/189  | 93/18862  | 2.44E-03 | 2.37E-02 | 1.62E-02 | F2/NF2/PPARG/NOTCH1/SHH                                                  |
| BP | GO:0001503 | ossification                                               | 11/189 | 401/18862 | 2.46E-03 | 2.38E-02 | 1.63E-02 | HSD17B4/MMP2/PTK2B/HDAC7/ACVR2B/BMP1/PPARG/NOTCH1/SEMA4D/GLI1/SHH        |
| BP | GO:1903039 | positive regulation of leukocyte cell-cell adhesion        | 8/189  | 234/18862 | 2.54E-03 | 2.45E-02 | 1.68E-02 | RAC1/HLA-DRB1/RARA/IFNG/DPP4/CD74/IL2/SHH                                |
| BP | GO:0003158 | endothelium development                                    | 6/189  | 137/18862 | 2.60E-03 | 2.50E-02 | 1.72E-02 | ALOX12/ACVR2B/MSN/NOTCH1/TJP1/STARD13                                    |
| BP | GO:0045861 | negative regulation of proteolysis                         | 10/189 | 346/18862 | 2.64E-03 | 2.53E-02 | 1.74E-02 | F2/TRIM21/HSP90AB1/SERPINA5/XIAP/FHIT/SFN/DHCR24/SERPINA6/SHH            |
| BP | GO:0038061 | NIK/NF-kappaB signaling                                    | 7/189  | 185/18862 | 2.67E-03 | 2.55E-02 | 1.75E-02 | CUL1/EP300/HDAC7/SKP1/TLR4/ALK/BTRC                                      |
| BP | GO:0001889 | liver development                                          | 6/189  | 138/18862 | 2.69E-03 | 2.55E-02 | 1.75E-02 | HMGCS1/HMOX1/NOTCH1/ZIC3/ARF6/GLI1                                       |
| BP | GO:0010039 | response to iron ion                                       | 3/189  | 28/18862  | 2.70E-03 | 2.55E-02 | 1.75E-02 | HMOX1/B2M/G6PD                                                           |
| BP | GO:0060603 | mammary gland duct morphogenesis                           | 3/189  | 28/18862  | 2.70E-03 | 2.55E-02 | 1.75E-02 | AR/ESR1/BTRC                                                             |
| BP | GO:0072376 | protein activation cascade                                 | 3/189  | 28/18862  | 2.70E-03 | 2.55E-02 | 1.75E-02 | F2/F3/FN1                                                                |

|    |            |                                                                                          |        |           |          |          |          |                                                       |
|----|------------|------------------------------------------------------------------------------------------|--------|-----------|----------|----------|----------|-------------------------------------------------------|
| BP | GO:0072378 | blood coagulation, fibrin clot formation                                                 | 3/189  | 28/18862  | 2.70E-03 | 2.55E-02 | 1.75E-02 | F2/F3/FN1                                             |
| BP | GO:1903749 | positive regulation of establishment of protein localization to mitochondrion            | 4/189  | 58/18862  | 2.72E-03 | 2.56E-02 | 1.76E-02 | YWHAQ/YWHAH/SFN/NMT1                                  |
| BP | GO:0001666 | response to hypoxia                                                                      | 10/189 | 348/18862 | 2.75E-03 | 2.58E-02 | 1.77E-02 | HK2/EP300/MMP2/HMOX1/VEGFB/PTK2B/PGK1/NOTCH1/ANG/DPP4 |
| BP | GO:0050767 | regulation of neurogenesis                                                               | 10/189 | 348/18862 | 2.75E-03 | 2.58E-02 | 1.77E-02 | F2/NF2/B2M/PPARG/NOTCH1/IFNG/YWHAH/FN1/SEMA4D/SHH     |
| BP | GO:0042100 | B cell proliferation                                                                     | 5/189  | 96/18862  | 2.80E-03 | 2.62E-02 | 1.80E-02 | VAV3/BTK/TLR4/CD74/IL2                                |
| BP | GO:0048661 | positive regulation of smooth muscle cell proliferation                                  | 5/189  | 96/18862  | 2.80E-03 | 2.62E-02 | 1.80E-02 | MMP2/HBEGF/HMOX1/ALOX12/ABCC4                         |
| BP | GO:0043030 | regulation of macrophage activation                                                      | 4/189  | 59/18862  | 2.89E-03 | 2.68E-02 | 1.84E-02 | BPI/TLR4/CD74/NR1H3                                   |
| BP | GO:0046718 | viral entry into host cell                                                               | 6/189  | 140/18862 | 2.89E-03 | 2.68E-02 | 1.84E-02 | TRIM21/WWP1/ITGB3/HLA-DRB1/DPP4/CD74                  |
| BP | GO:0061008 | hepaticobiliary system development                                                       | 6/189  | 140/18862 | 2.89E-03 | 2.68E-02 | 1.84E-02 | HMGCS1/HMOX1/NOTCH1/ZIC3/ARF6/GLI1                    |
| BP | GO:0050690 | regulation of defense response to virus by virus                                         | 3/189  | 29/18862  | 2.99E-03 | 2.75E-02 | 1.89E-02 | RAC1/HCK/B2M                                          |
| BP | GO:1902624 | positive regulation of neutrophil migration                                              | 3/189  | 29/18862  | 2.99E-03 | 2.75E-02 | 1.89E-02 | RAC1/DAPK2/CD74                                       |
| BP | GO:0060759 | regulation of response to cytokine stimulus                                              | 7/189  | 189/18862 | 3.00E-03 | 2.76E-02 | 1.89E-02 | HSP90AB1/TLR4/IFNGR1/PPARG/IFNG/CD74/NR1H3            |
| BP | GO:0032722 | positive regulation of chemokine production                                              | 4/189  | 60/18862  | 3.07E-03 | 2.81E-02 | 1.93E-02 | HMOX1/TLR4/IFNG/CD74                                  |
| BP | GO:1902110 | positive regulation of mitochondrial membrane permeability involved in apoptotic process | 4/189  | 60/18862  | 3.07E-03 | 2.81E-02 | 1.93E-02 | YWHAQ/YWHAH/SFN/NMT1                                  |

|    |            |                                                                                                                                                  |        |           |          |          |          |                                                   |
|----|------------|--------------------------------------------------------------------------------------------------------------------------------------------------|--------|-----------|----------|----------|----------|---------------------------------------------------|
| BP | GO:1904356 | regulation of telomere maintenance via telomere lengthening                                                                                      | 4/189  | 60/18862  | 3.07E-03 | 2.81E-02 | 1.93E-02 | POT1/SMG5/HNRNPA2B1/PARN                          |
| BP | GO:1901605 | alpha-amino acid metabolic process                                                                                                               | 7/189  | 191/18862 | 3.18E-03 | 2.90E-02 | 1.99E-02 | MTAP/HPD/PAH/GAD2/ODC1/GART/OAT                   |
| BP | GO:0002702 | positive regulation of production of molecular mediator of immune response                                                                       | 5/189  | 99/18862  | 3.20E-03 | 2.91E-02 | 1.99E-02 | MSH2/B2M/TLR4/CD74/IL2                            |
| BP | GO:0002824 | positive regulation of adaptive immune response based on somatic recombination of immune receptors built from immunoglobulin superfamily domains | 5/189  | 99/18862  | 3.20E-03 | 2.91E-02 | 1.99E-02 | BTK/MSH2/B2M/HLA-DRB1/IL2                         |
| BP | GO:0048754 | branching morphogenesis of an epithelial tube                                                                                                    | 6/189  | 143/18862 | 3.21E-03 | 2.91E-02 | 1.99E-02 | AR/ESR1/NOTCH1/BTRC/STK4/SHH                      |
| BP | GO:0046824 | positive regulation of nucleocytoplasmic transport                                                                                               | 4/189  | 61/18862  | 3.27E-03 | 2.94E-02 | 2.02E-02 | HSP90AB1/IFNG/SFN/SHH                             |
| BP | GO:1905330 | regulation of morphogenesis of an epithelium                                                                                                     | 4/189  | 61/18862  | 3.27E-03 | 2.94E-02 | 2.02E-02 | AR/ESR1/ALOX12/SHH                                |
| BP | GO:0006221 | pyrimidine nucleotide biosynthetic process                                                                                                       | 3/189  | 30/18862  | 3.29E-03 | 2.94E-02 | 2.02E-02 | NME3/DTYMK/DCTD                                   |
| BP | GO:0045577 | regulation of B cell differentiation                                                                                                             | 3/189  | 30/18862  | 3.29E-03 | 2.94E-02 | 2.02E-02 | BTK/HMGB3/IL2                                     |
| BP | GO:0060045 | positive regulation of cardiac muscle cell proliferation                                                                                         | 3/189  | 30/18862  | 3.29E-03 | 2.94E-02 | 2.02E-02 | ERBB4/NOTCH1/GLI1                                 |
| BP | GO:0030900 | forebrain development                                                                                                                            | 10/189 | 357/18862 | 3.30E-03 | 2.94E-02 | 2.02E-02 | NF2/RRM1/B2M/NSUN5/ERBB4/ALK/NOTCH1/GART/GLI1/SHH |
| BP | GO:0007044 | cell-substrate junction assembly                                                                                                                 | 5/189  | 100/18862 | 3.35E-03 | 2.98E-02 | 2.04E-02 | RAC1/EPHA3/PTK2B/BCR/FN1                          |
| BP | GO:0009755 | hormone-mediated signaling pathway                                                                                                               | 7/189  | 193/18862 | 3.37E-03 | 2.99E-02 | 2.05E-02 | RARG/EP300/AR/ESR1/PPARG/RARA/YWHAH               |



|    |            |                                                                                 |        |           |          |          |          |                                                       |
|----|------------|---------------------------------------------------------------------------------|--------|-----------|----------|----------|----------|-------------------------------------------------------|
| BP | GO:0031589 | cell-substrate adhesion                                                         | 10/189 | 359/18862 | 3.43E-03 | 3.04E-02 | 2.08E-02 | NF2/RAC1/EPHA3/PTK2B/BCR/ATXN3/ITGB3/NOTCH1/STK4/FN1  |
| BP | GO:0045453 | bone resorption                                                                 | 4/189  | 62/18862  | 3.46E-03 | 3.04E-02 | 2.09E-02 | RAC1/PTK2B/ITGB3/PDK4                                 |
| BP | GO:0070527 | platelet aggregation                                                            | 4/189  | 62/18862  | 3.46E-03 | 3.04E-02 | 2.09E-02 | HBB/ALOX12/ITGB3/FN1                                  |
| BP | GO:1902686 | mitochondrial outer membrane permeabilization involved in programmed cell death | 4/189  | 62/18862  | 3.46E-03 | 3.04E-02 | 2.09E-02 | YWHAQ/YWHAH/SFN/NMT1                                  |
| BP | GO:0046634 | regulation of alpha-beta T cell activation                                      | 5/189  | 101/18862 | 3.49E-03 | 3.06E-02 | 2.09E-02 | HLA-DRB1/RARA/IFNG/IL2/SHH                            |
| BP | GO:1901214 | regulation of neuron death                                                      | 9/189  | 302/18862 | 3.49E-03 | 3.06E-02 | 2.09E-02 | HMOX1/PTK2B/HSP90AB1/MSH2/TLR4/NAE1/IFNG/G6PD/DHCR24  |
| BP | GO:0036293 | response to decreased oxygen levels                                             | 10/189 | 360/18862 | 3.50E-03 | 3.06E-02 | 2.09E-02 | HK2/EP300/MMP2/HMOX1/VEGFB/PTK2B/PGK1/NOTCH1/ANG/DPP4 |
| BP | GO:0051896 | regulation of protein kinase B signaling                                        | 8/189  | 247/18862 | 3.53E-03 | 3.07E-02 | 2.10E-02 | HBEGF/ESR1/RAC1/IGF1R/HSP90AB1/F3/ERBB4/MAGI2         |
| BP | GO:0045580 | regulation of T cell differentiation                                            | 6/189  | 146/18862 | 3.56E-03 | 3.09E-02 | 2.12E-02 | HLA-DRB1/RARA/IFNG/CD74/IL2/SHH                       |
| BP | GO:1902806 | regulation of cell cycle G1/S phase transition                                  | 7/189  | 195/18862 | 3.57E-03 | 3.09E-02 | 2.12E-02 | EP300/MUC1/SEN2/WEE1/APEX1/SFN/GLI1                   |
| BP | GO:0033157 | regulation of intracellular protein transport                                   | 8/189  | 248/18862 | 3.61E-03 | 3.12E-02 | 2.14E-02 | HSP90AB1/YWHAQ/IFNG/B3GAT3/YWHAH/SFN/NMT1/SHH         |
| BP | GO:0034390 | smooth muscle cell apoptotic process                                            | 3/189  | 31/18862  | 3.62E-03 | 3.12E-02 | 2.14E-02 | PPARG/IFNG/STK4                                       |
| BP | GO:0034391 | regulation of smooth muscle cell apoptotic process                              | 3/189  | 31/18862  | 3.62E-03 | 3.12E-02 | 2.14E-02 | PPARG/IFNG/STK4                                       |
| BP | GO:0071887 | leukocyte apoptotic process                                                     | 5/189  | 102/18862 | 3.64E-03 | 3.13E-02 | 2.15E-02 | BTK/DFFA/FAS/CD74/IL2                                 |
| BP | GO:0048662 | negative regulation of smooth muscle cell proliferation                         | 4/189  | 63/18862  | 3.67E-03 | 3.13E-02 | 2.15E-02 | HMOX1/PPARG/IFNG/ANG                                  |

|    |            |                                                                                              |        |           |          |          |          |                                                          |
|----|------------|----------------------------------------------------------------------------------------------|--------|-----------|----------|----------|----------|----------------------------------------------------------|
| BP | GO:0061180 | mammary gland epithelium development                                                         | 4/189  | 63/18862  | 3.67E-03 | 3.13E-02 | 2.15E-02 | AR/ESR1/ERBB4/BTRC                                       |
| BP | GO:0043393 | regulation of protein binding                                                                | 7/189  | 196/18862 | 3.67E-03 | 3.13E-02 | 2.15E-02 | EP300/PTPRF/TRIM21/HSP90AB1/SEN2/B2M/STK4                |
| BP | GO:0006352 | DNA-templated transcription, initiation                                                      | 8/189  | 249/18862 | 3.70E-03 | 3.15E-02 | 2.16E-02 | RARG/AR/ESR1/PPARG/NOTCH1/RARA/TAF13/NR1H3               |
| BP | GO:0019318 | hexose metabolic process                                                                     | 8/189  | 250/18862 | 3.79E-03 | 3.20E-02 | 2.20E-02 | HK2/EP300/DCXR/PDK2/ACACB/PGK1/G6PD/PDK4                 |
| BP | GO:1901991 | negative regulation of mitotic cell cycle phase transition                                   | 8/189  | 250/18862 | 3.79E-03 | 3.20E-02 | 2.20E-02 | CUL1/EP300/MUC1/SKP1/WEE1/NAE1/SFN/NDC80                 |
| BP | GO:0030593 | neutrophil chemotaxis                                                                        | 5/189  | 103/18862 | 3.80E-03 | 3.20E-02 | 2.20E-02 | VAV3/RAC1/DAPK2/DPP4/CD74                                |
| BP | GO:0032526 | response to retinoic acid                                                                    | 5/189  | 103/18862 | 3.80E-03 | 3.20E-02 | 2.20E-02 | RARG/EPHA3/PTK2B/PPARG/RARA                              |
| BP | GO:0090092 | regulation of transmembrane receptor protein serine/threonine kinase signaling pathway       | 8/189  | 251/18862 | 3.88E-03 | 3.23E-02 | 2.21E-02 | EP300/HSP90AB1/ACVR2B/MAGI2/PPARG/NOTCH1/XIAP/SHH        |
| BP | GO:0002562 | somatic diversification of immune receptors via germline recombination within a single locus | 4/189  | 64/18862  | 3.88E-03 | 3.23E-02 | 2.21E-02 | MSH2/YY1/PARP3/IL2                                       |
| BP | GO:0016444 | somatic cell DNA recombination                                                               | 4/189  | 64/18862  | 3.88E-03 | 3.23E-02 | 2.21E-02 | MSH2/YY1/PARP3/IL2                                       |
| BP | GO:0016445 | somatic diversification of immunoglobulins                                                   | 4/189  | 64/18862  | 3.88E-03 | 3.23E-02 | 2.21E-02 | MSH2/YY1/PARP3/IL2                                       |
| BP | GO:0035794 | positive regulation of mitochondrial membrane permeability                                   | 4/189  | 64/18862  | 3.88E-03 | 3.23E-02 | 2.21E-02 | YWHAQ/YWHAH/SFN/NMT1                                     |
| BP | GO:0071300 | cellular response to retinoic acid                                                           | 4/189  | 64/18862  | 3.88E-03 | 3.23E-02 | 2.21E-02 | RARG/EPHA3/PTK2B/PPARG                                   |
| BP | GO:0007389 | pattern specification process                                                                | 11/189 | 426/18862 | 3.89E-03 | 3.23E-02 | 2.21E-02 | RARG/EP300/AR/ACVR2B/SEN2/ERBB4/NOTCH1/ZIC3/YY1/GLI1/SHH |

|    |            |                                                                        |        |           |          |          |          |                                                     |
|----|------------|------------------------------------------------------------------------|--------|-----------|----------|----------|----------|-----------------------------------------------------|
| BP | GO:0002821 | positive regulation of adaptive immune response                        | 5/189  | 104/18862 | 3.96E-03 | 3.23E-02 | 2.22E-02 | BTK/MSH2/B2M/HLA-DRB1/IL2                           |
| BP | GO:0010661 | positive regulation of muscle cell apoptotic process                   | 3/189  | 32/18862  | 3.97E-03 | 3.23E-02 | 2.22E-02 | PPARG/IFNG/STK4                                     |
| BP | GO:0010743 | regulation of macrophage derived foam cell differentiation             | 3/189  | 32/18862  | 3.97E-03 | 3.23E-02 | 2.22E-02 | ITGB3/PPARG/NR1H3                                   |
| BP | GO:0038128 | ERBB2 signaling pathway                                                | 3/189  | 32/18862  | 3.97E-03 | 3.23E-02 | 2.22E-02 | HBEGF/MATK/ERBB4                                    |
| BP | GO:0043372 | positive regulation of CD4-positive, alpha-beta T cell differentiation | 3/189  | 32/18862  | 3.97E-03 | 3.23E-02 | 2.22E-02 | HLA-DRB1/RARA/IFNG                                  |
| BP | GO:0045684 | positive regulation of epidermis development                           | 3/189  | 32/18862  | 3.97E-03 | 3.23E-02 | 2.22E-02 | NCOA3/NOTCH1/SFN                                    |
| BP | GO:0048384 | retinoic acid receptor signaling pathway                               | 3/189  | 32/18862  | 3.97E-03 | 3.23E-02 | 2.22E-02 | RARG/PPARG/RARA                                     |
| BP | GO:1903902 | positive regulation of viral life cycle                                | 3/189  | 32/18862  | 3.97E-03 | 3.23E-02 | 2.22E-02 | TRIM21/HLA-DRB1/CD74                                |
| BP | GO:0002791 | regulation of peptide secretion                                        | 9/189  | 308/18862 | 3.97E-03 | 3.23E-02 | 2.22E-02 | RAC1/TLR4/HLA-DRB1/IFNG/ANG/DPP4/ARF6/CD74/NR1H3    |
| BP | GO:0045862 | positive regulation of proteolysis                                     | 10/189 | 367/18862 | 4.01E-03 | 3.26E-02 | 2.23E-02 | PTK2B/ALOX12/F3/SART3/FAS/ATXN3/PPARG/IFNG/BTRC/FN1 |
| BP | GO:0006090 | pyruvate metabolic process                                             | 6/189  | 150/18862 | 4.06E-03 | 3.29E-02 | 2.25E-02 | HK2/EP300/PDK2/PGK1/IFNG/PDK4                       |
| BP | GO:0050871 | positive regulation of B cell activation                               | 6/189  | 150/18862 | 4.06E-03 | 3.29E-02 | 2.25E-02 | VAV3/BTK/MSH2/TLR4/CD74/IL2                         |
| BP | GO:0070265 | necrotic cell death                                                    | 4/189  | 65/18862  | 4.11E-03 | 3.31E-02 | 2.27E-02 | PYGL/ITPK1/TLR4/FAS                                 |
| BP | GO:2000573 | positive regulation of DNA biosynthetic process                        | 4/189  | 65/18862  | 4.11E-03 | 3.31E-02 | 2.27E-02 | POT1/PTK2B/HSP90AB1/PARN                            |
| BP | GO:0006637 | acyl-CoA metabolic process                                             | 5/189  | 105/18862 | 4.12E-03 | 3.31E-02 | 2.27E-02 | HSD17B4/HMGCS1/PDK2/ACACB/PDK4                      |

|    |            |                                                                                 |        |           |          |          |          |                                                       |
|----|------------|---------------------------------------------------------------------------------|--------|-----------|----------|----------|----------|-------------------------------------------------------|
| BP | GO:0035383 | thioester metabolic process                                                     | 5/189  | 105/18862 | 4.12E-03 | 3.31E-02 | 2.27E-02 | HSD17B4/HMGCS1/PDK2/ACACB/PDK4                        |
| BP | GO:0032535 | regulation of cellular component size                                           | 10/189 | 370/18862 | 4.24E-03 | 3.34E-02 | 2.29E-02 | RARG/VAV3/RAC1/HCK/PTK2B/HSP90AB1/MSN/ARF6/FN1/SEMA4D |
| BP | GO:0010887 | negative regulation of cholesterol storage                                      | 2/189  | 10/18862  | 4.26E-03 | 3.34E-02 | 2.29E-02 | PPARG/NR1H3                                           |
| BP | GO:0060513 | prostatic bud formation                                                         | 2/189  | 10/18862  | 4.26E-03 | 3.34E-02 | 2.29E-02 | AR/SHH                                                |
| BP | GO:0060525 | prostate glandular acinus development                                           | 2/189  | 10/18862  | 4.26E-03 | 3.34E-02 | 2.29E-02 | ESR1/NOTCH1                                           |
| BP | GO:1905461 | positive regulation of vascular associated smooth muscle cell apoptotic process | 2/189  | 10/18862  | 4.26E-03 | 3.34E-02 | 2.29E-02 | PPARG/STK4                                            |
| BP | GO:2000343 | positive regulation of chemokine (C-X-C motif) ligand 2 production              | 2/189  | 10/18862  | 4.26E-03 | 3.34E-02 | 2.29E-02 | TLR4/CD74                                             |
| BP | GO:0007229 | integrin-mediated signaling pathway                                             | 5/189  | 106/18862 | 4.29E-03 | 3.34E-02 | 2.29E-02 | VAV3/HCK/PTK2B/ITGB3/FN1                              |
| BP | GO:0009062 | fatty acid catabolic process                                                    | 5/189  | 106/18862 | 4.29E-03 | 3.34E-02 | 2.29E-02 | HSD17B4/ACADVL/ACACB/ECI2/ECHS1                       |
| BP | GO:0018958 | phenol-containing compound metabolic process                                    | 5/189  | 106/18862 | 4.29E-03 | 3.34E-02 | 2.29E-02 | ZEB2/PAH/SULT1A1/CYP2E1/PNMT                          |
| BP | GO:0044774 | mitotic DNA integrity checkpoint                                                | 5/189  | 106/18862 | 4.29E-03 | 3.34E-02 | 2.29E-02 | EP300/MUC1/MSH2/NAE1/SFN                              |
| BP | GO:0048259 | regulation of receptor-mediated endocytosis                                     | 5/189  | 106/18862 | 4.29E-03 | 3.34E-02 | 2.29E-02 | RAC1/B2M/ITGB3/MAGI2/ARF6                             |
| BP | GO:0010922 | positive regulation of phosphatase activity                                     | 3/189  | 33/18862  | 4.33E-03 | 3.34E-02 | 2.29E-02 | HSP90AB1/MAGI2/IFNG                                   |
| BP | GO:0045589 | regulation of regulatory T cell differentiation                                 | 3/189  | 33/18862  | 4.33E-03 | 3.34E-02 | 2.29E-02 | HLA-DRB1/IFNG/IL2                                     |
| BP | GO:0050869 | negative regulation of B cell activation                                        | 3/189  | 33/18862  | 4.33E-03 | 3.34E-02 | 2.29E-02 | BTK/HMGB3/PARP3                                       |

|    |            |                                                                                 |       |           |          |          |          |                                       |
|----|------------|---------------------------------------------------------------------------------|-------|-----------|----------|----------|----------|---------------------------------------|
| BP | GO:0051973 | positive regulation of telomerase activity                                      | 3/189 | 33/18862  | 4.33E-03 | 3.34E-02 | 2.29E-02 | POT1/HSP90AB1/PARN                    |
| BP | GO:0055094 | response to lipoprotein particle                                                | 3/189 | 33/18862  | 4.33E-03 | 3.34E-02 | 2.29E-02 | HMGCS1/TLR4/PPARG                     |
| BP | GO:0002294 | CD4-positive, alpha-beta T cell differentiation involved in immune response     | 4/189 | 66/18862  | 4.34E-03 | 3.34E-02 | 2.29E-02 | HLA-DRB1/RARA/IFNG/IL2                |
| BP | GO:0030193 | regulation of blood coagulation                                                 | 4/189 | 66/18862  | 4.34E-03 | 3.34E-02 | 2.29E-02 | F2/ALOX12/F3/FAP                      |
| BP | GO:0046635 | positive regulation of alpha-beta T cell activation                             | 4/189 | 66/18862  | 4.34E-03 | 3.34E-02 | 2.29E-02 | HLA-DRB1/RARA/IFNG/SHH                |
| BP | GO:1902108 | regulation of mitochondrial membrane permeability involved in apoptotic process | 4/189 | 66/18862  | 4.34E-03 | 3.34E-02 | 2.29E-02 | YWHAQ/YWHAH/SFN/NMT1                  |
| BP | GO:0009952 | anterior/posterior pattern specification                                        | 7/189 | 203/18862 | 4.44E-03 | 3.41E-02 | 2.34E-02 | RARG/EP300/ACVR2B/NOTCH1/ZIC3/YY1/SHH |
| BP | GO:0002526 | acute inflammatory response                                                     | 5/189 | 107/18862 | 4.47E-03 | 3.41E-02 | 2.34E-02 | F2/BTK/F3/PPARG/FN1                   |
| BP | GO:0046632 | alpha-beta T cell differentiation                                               | 5/189 | 107/18862 | 4.47E-03 | 3.41E-02 | 2.34E-02 | HLA-DRB1/RARA/IFNG/IL2/SHH            |
| BP | GO:0044409 | entry into host                                                                 | 6/189 | 153/18862 | 4.48E-03 | 3.41E-02 | 2.34E-02 | TRIM21/WWP1/ITGB3/HLA-DRB1/DPP4/CD74  |
| BP | GO:0002287 | alpha-beta T cell activation involved in immune response                        | 4/189 | 67/18862  | 4.58E-03 | 3.44E-02 | 2.36E-02 | HLA-DRB1/RARA/IFNG/IL2                |
| BP | GO:0002293 | alpha-beta T cell differentiation involved in immune response                   | 4/189 | 67/18862  | 4.58E-03 | 3.44E-02 | 2.36E-02 | HLA-DRB1/RARA/IFNG/IL2                |
| BP | GO:0033866 | nucleoside bisphosphate biosynthetic process                                    | 4/189 | 67/18862  | 4.58E-03 | 3.44E-02 | 2.36E-02 | PAPSS1/PDK2/ACACB/PDK4                |
| BP | GO:0034030 | ribonucleoside bisphosphate biosynthetic process                                | 4/189 | 67/18862  | 4.58E-03 | 3.44E-02 | 2.36E-02 | PAPSS1/PDK2/ACACB/PDK4                |
| BP | GO:0034033 | purine nucleoside bisphosphate biosynthetic process                             | 4/189 | 67/18862  | 4.58E-03 | 3.44E-02 | 2.36E-02 | PAPSS1/PDK2/ACACB/PDK4                |

|    |            |                                                                                  |        |           |          |          |          |                                                               |
|----|------------|----------------------------------------------------------------------------------|--------|-----------|----------|----------|----------|---------------------------------------------------------------|
| BP | GO:1900046 | regulation of hemostasis                                                         | 4/189  | 67/18862  | 4.58E-03 | 3.44E-02 | 2.36E-02 | F2/ALOX12/F3/FAP                                              |
| BP | GO:1905953 | negative regulation of lipid localization                                        | 4/189  | 67/18862  | 4.58E-03 | 3.44E-02 | 2.36E-02 | ITGB3/PPARG/NR1H3/SHH                                         |
| BP | GO:2000514 | regulation of CD4-positive, alpha-beta T cell activation                         | 4/189  | 67/18862  | 4.58E-03 | 3.44E-02 | 2.36E-02 | HLA-DRB1/RARA/IFNG/IL2                                        |
| BP | GO:0002446 | neutrophil mediated immunity                                                     | 12/189 | 499/18862 | 4.59E-03 | 3.44E-02 | 2.36E-02 | F2/XRCC6/HBB/RAC1/FCGR2A/HSP90AB1/PYGL/TTR/BPI/B2M/PSAP/PA2G4 |
| BP | GO:0001938 | positive regulation of endothelial cell proliferation                            | 5/189  | 108/18862 | 4.65E-03 | 3.44E-02 | 2.36E-02 | HMOX1/VEGFB/F3/ITGB3/ANG                                      |
| BP | GO:0002708 | positive regulation of lymphocyte mediated immunity                              | 5/189  | 108/18862 | 4.65E-03 | 3.44E-02 | 2.36E-02 | BTK/MSH2/B2M/HLA-DRB1/IL2                                     |
| BP | GO:0071156 | regulation of cell cycle arrest                                                  | 5/189  | 108/18862 | 4.65E-03 | 3.44E-02 | 2.36E-02 | EP300/MUC1/HSP90AB1/FAP/SFN                                   |
| BP | GO:0043281 | regulation of cysteine-type endopeptidase activity involved in apoptotic process | 7/189  | 205/18862 | 4.69E-03 | 3.44E-02 | 2.36E-02 | ALOX12/F3/FAS/PPARG/XIAP/SFN/DHCR24                           |
| BP | GO:0001819 | positive regulation of cytokine production                                       | 11/189 | 437/18862 | 4.70E-03 | 3.44E-02 | 2.36E-02 | EP300/XRCC6/HMOX1/F3/B2M/TLR4/IFNGR1/RARA/IFNG/CD74/IL2       |
| BP | GO:0009112 | nucleobase metabolic process                                                     | 3/189  | 34/18862  | 4.72E-03 | 3.44E-02 | 2.36E-02 | RRM1/TTR/GART                                                 |
| BP | GO:0010543 | regulation of platelet activation                                                | 3/189  | 34/18862  | 4.72E-03 | 3.44E-02 | 2.36E-02 | F2/ALOX12/TLR4                                                |
| BP | GO:0010614 | negative regulation of cardiac muscle hypertrophy                                | 3/189  | 34/18862  | 4.72E-03 | 3.44E-02 | 2.36E-02 | NOTCH1/YY1/G6PD                                               |
| BP | GO:0035137 | hindlimb morphogenesis                                                           | 3/189  | 34/18862  | 4.72E-03 | 3.44E-02 | 2.36E-02 | RARG/NOTCH1/SHH                                               |
| BP | GO:0043276 | anoikis                                                                          | 3/189  | 34/18862  | 4.72E-03 | 3.44E-02 | 2.36E-02 | DAPK2/NOTCH1/PDK4                                             |
| BP | GO:0045922 | negative regulation of fatty acid metabolic process                              | 3/189  | 34/18862  | 4.72E-03 | 3.44E-02 | 2.36E-02 | ACADVL/CYP7A1/ACACB                                           |

|    |            |                                                                                                                                         |       |           |          |          |          |                                            |
|----|------------|-----------------------------------------------------------------------------------------------------------------------------------------|-------|-----------|----------|----------|----------|--------------------------------------------|
| BP | GO:0048261 | negative regulation of receptor-mediated endocytosis                                                                                    | 3/189 | 34/18862  | 4.72E-03 | 3.44E-02 | 2.36E-02 | RAC1/ITGB3/ARF6                            |
| BP | GO:0071402 | cellular response to lipoprotein particle stimulus                                                                                      | 3/189 | 34/18862  | 4.72E-03 | 3.44E-02 | 2.36E-02 | HMGCS1/TLR4/PPARG                          |
| BP | GO:0090050 | positive regulation of cell migration involved in sprouting angiogenesis                                                                | 3/189 | 34/18862  | 4.72E-03 | 3.44E-02 | 2.36E-02 | HMOX1/MAP3K3/HDAC7                         |
| BP | GO:0002822 | regulation of adaptive immune response based on somatic recombination of immune receptors built from immunoglobulin superfamily domains | 6/189 | 155/18862 | 4.77E-03 | 3.47E-02 | 2.38E-02 | BTK/MSH2/B2M/HLA-DRB1/PARP3/IL2            |
| BP | GO:0007004 | telomere maintenance via telomerase                                                                                                     | 4/189 | 68/18862  | 4.83E-03 | 3.50E-02 | 2.40E-02 | POT1/HSP90AB1/SMG5/PARN                    |
| BP | GO:0045685 | regulation of glial cell differentiation                                                                                                | 4/189 | 68/18862  | 4.83E-03 | 3.50E-02 | 2.40E-02 | F2/PPARG/NOTCH1/SHH                        |
| BP | GO:0051403 | stress-activated MAPK cascade                                                                                                           | 8/189 | 261/18862 | 4.90E-03 | 3.54E-02 | 2.43E-02 | CUL1/MAP3K3/PTK2B/IGF1R/SKP1/TLR4/FAS/BTRC |
| BP | GO:0009132 | nucleoside diphosphate metabolic process                                                                                                | 6/189 | 156/18862 | 4.92E-03 | 3.55E-02 | 2.43E-02 | HK2/EP300/NME3/DTYMK/PGK1/IFNG             |
| BP | GO:0072522 | purine-containing compound biosynthetic process                                                                                         | 7/189 | 208/18862 | 5.07E-03 | 3.61E-02 | 2.47E-02 | NME3/MTAP/PAPSS1/PDK2/ACACB/GART/PDK4      |
| BP | GO:0002706 | regulation of lymphocyte mediated immunity                                                                                              | 6/189 | 157/18862 | 5.07E-03 | 3.61E-02 | 2.47E-02 | BTK/MSH2/B2M/HLA-DRB1/PARP3/IL2            |
| BP | GO:1905710 | positive regulation of membrane permeability                                                                                            | 4/189 | 69/18862  | 5.08E-03 | 3.61E-02 | 2.47E-02 | YWHAQ/YWHAH/SFN/NMT1                       |
| BP | GO:0045191 | regulation of isotype switching                                                                                                         | 3/189 | 35/18862  | 5.12E-03 | 3.61E-02 | 2.47E-02 | MSH2/PARP3/IL2                             |
| BP | GO:0003157 | endocardium development                                                                                                                 | 2/189 | 11/18862  | 5.18E-03 | 3.61E-02 | 2.47E-02 | NOTCH1/STK4                                |

|    |            |                                                                               |       |           |          |          |          |                                     |
|----|------------|-------------------------------------------------------------------------------|-------|-----------|----------|----------|----------|-------------------------------------|
| BP | GO:000658  | L-phenylalanine metabolic process                                             | 2/189 | 11/18862  | 5.18E-03 | 3.61E-02 | 2.47E-02 | HPD/PAH                             |
| BP | GO:000659  | L-phenylalanine catabolic process                                             | 2/189 | 11/18862  | 5.18E-03 | 3.61E-02 | 2.47E-02 | HPD/PAH                             |
| BP | GO:0006702 | androgen biosynthetic process                                                 | 2/189 | 11/18862  | 5.18E-03 | 3.61E-02 | 2.47E-02 | CYP17A1/SRD5A2                      |
| BP | GO:0021936 | regulation of cerebellar granule cell precursor proliferation                 | 2/189 | 11/18862  | 5.18E-03 | 3.61E-02 | 2.47E-02 | GLI1/SHH                            |
| BP | GO:0032957 | inositol trisphosphate metabolic process                                      | 2/189 | 11/18862  | 5.18E-03 | 3.61E-02 | 2.47E-02 | PTK2B/ITPK1                         |
| BP | GO:0033197 | response to vitamin E                                                         | 2/189 | 11/18862  | 5.18E-03 | 3.61E-02 | 2.47E-02 | HMGCS1/PPARG                        |
| BP | GO:0045060 | negative thymic T cell selection                                              | 2/189 | 11/18862  | 5.18E-03 | 3.61E-02 | 2.47E-02 | CD74/SHH                            |
| BP | GO:0045348 | positive regulation of MHC class II biosynthetic process                      | 2/189 | 11/18862  | 5.18E-03 | 3.61E-02 | 2.47E-02 | TLR4/IFNG                           |
| BP | GO:0045657 | positive regulation of monocyte differentiation                               | 2/189 | 11/18862  | 5.18E-03 | 3.61E-02 | 2.47E-02 | HLA-DRB1/CD74                       |
| BP | GO:0071492 | cellular response to UV-A                                                     | 2/189 | 11/18862  | 5.18E-03 | 3.61E-02 | 2.47E-02 | MMP2/MMP1                           |
| BP | GO:1900222 | negative regulation of amyloid-beta clearance                                 | 2/189 | 11/18862  | 5.18E-03 | 3.61E-02 | 2.47E-02 | IFNGR1/IFNG                         |
| BP | GO:1902221 | erythrose 4-phosphate/phosphoenolpyruvate family amino acid metabolic process | 2/189 | 11/18862  | 5.18E-03 | 3.61E-02 | 2.47E-02 | HPD/PAH                             |
| BP | GO:1902222 | erythrose 4-phosphate/phosphoenolpyruvate family amino acid catabolic process | 2/189 | 11/18862  | 5.18E-03 | 3.61E-02 | 2.47E-02 | HPD/PAH                             |
| BP | GO:0000075 | cell cycle checkpoint                                                         | 7/189 | 209/18862 | 5.20E-03 | 3.61E-02 | 2.48E-02 | EP300/MUC1/MSH2/WEE1/NAE1/SFN/NDC80 |



|    |            |                                                                                  |       |           |          |          |          |                                                |
|----|------------|----------------------------------------------------------------------------------|-------|-----------|----------|----------|----------|------------------------------------------------|
| BP | GO:0051651 | maintenance of location in cell                                                  | 7/189 | 209/18862 | 5.20E-03 | 3.61E-02 | 2.48E-02 | F2/HK2/PTK2B/SKP1/ANXA6/ATP7B/ALB              |
| BP | GO:0002286 | T cell activation involved in immune response                                    | 5/189 | 111/18862 | 5.22E-03 | 3.62E-02 | 2.48E-02 | HLA-DRB1/RARA/IFNG/CD74/IL2                    |
| BP | GO:0044106 | cellular amine metabolic process                                                 | 6/189 | 158/18862 | 5.23E-03 | 3.62E-02 | 2.48E-02 | DHPS/PAH/SULT1A1/ODC1/PNMT/CHKA                |
| BP | GO:0035303 | regulation of dephosphorylation                                                  | 7/189 | 210/18862 | 5.34E-03 | 3.69E-02 | 2.53E-02 | PPP2R1A/HSP90AB1/SMG5/MAGI2/IFNG/B3GAT3/SEMA4D |
| BP | GO:0006879 | cellular iron ion homeostasis                                                    | 4/189 | 70/18862  | 5.35E-03 | 3.69E-02 | 2.53E-02 | CUL1/HMOX1/SKP1/IFNG                           |
| BP | GO:0051092 | positive regulation of NF-kappaB transcription factor activity                   | 6/189 | 159/18862 | 5.39E-03 | 3.71E-02 | 2.54E-02 | AR/BTK/TRIM21/TLR4/ALK/PRKCB                   |
| BP | GO:0021782 | glial cell development                                                           | 5/189 | 112/18862 | 5.42E-03 | 3.72E-02 | 2.55E-02 | NSUN5/TLR4/IFNGR1/IFNG/SHH                     |
| BP | GO:0014741 | negative regulation of muscle hypertrophy                                        | 3/189 | 36/18862  | 5.54E-03 | 3.78E-02 | 2.59E-02 | NOTCH1/YY1/G6PD                                |
| BP | GO:0030224 | monocyte differentiation                                                         | 3/189 | 36/18862  | 5.54E-03 | 3.78E-02 | 2.59E-02 | HLA-DRB1/PPARG/CD74                            |
| BP | GO:0032435 | negative regulation of proteasomal ubiquitin-dependent protein catabolic process | 3/189 | 36/18862  | 5.54E-03 | 3.78E-02 | 2.59E-02 | HSP90AB1/FHIT/SHH                              |
| BP | GO:0045066 | regulatory T cell differentiation                                                | 3/189 | 36/18862  | 5.54E-03 | 3.78E-02 | 2.59E-02 | HLA-DRB1/IFNG/IL2                              |
| BP | GO:1904358 | positive regulation of telomere maintenance via telomere lengthening             | 3/189 | 36/18862  | 5.54E-03 | 3.78E-02 | 2.59E-02 | POT1/HNRNPA2B1/PARN                            |
| BP | GO:0050818 | regulation of coagulation                                                        | 4/189 | 71/18862  | 5.63E-03 | 3.82E-02 | 2.62E-02 | F2/ALOX12/F3/FAP                               |
| BP | GO:0021700 | developmental maturation                                                         | 8/189 | 268/18862 | 5.73E-03 | 3.88E-02 | 2.66E-02 | MMP2/BTK/RND1/PTK2B/PPARG/ANG/G6PD/SEMA4D      |

|    |            |                                                                      |       |           |          |          |          |                                                     |
|----|------------|----------------------------------------------------------------------|-------|-----------|----------|----------|----------|-----------------------------------------------------|
| BP | GO:190198  | negative regulation of cell cycle phase transition                   | 8/189 | 268/18862 | 5.73E-03 | 3.88E-02 | 2.66E-02 | CUL1/EP300/MUC1/SKP1/WEE1/NAE1/SFN/NDC80            |
| BP | GO:000223  | stimulatory C-type lectin receptor signaling pathway                 | 5/189 | 114/18862 | 5.83E-03 | 3.94E-02 | 2.70E-02 | CUL1/EP300/MUC1/SKP1/BTRC                           |
| BP | GO:0050863 | regulation of T cell activation                                      | 9/189 | 327/18862 | 5.84E-03 | 3.94E-02 | 2.70E-02 | RAC1/HLA-DRB1/RARA/IFNG/TNFAIP8L2/DPP4/CD74/IL2/SHH |
| BP | GO:0014855 | striated muscle cell proliferation                                   | 4/189 | 72/18862  | 5.91E-03 | 3.98E-02 | 2.73E-02 | ERBB4/NOTCH1/GLI1/SHH                               |
| BP | GO:1903747 | regulation of establishment of protein localization to mitochondrion | 4/189 | 72/18862  | 5.91E-03 | 3.98E-02 | 2.73E-02 | YWHAQ/YWHAH/SFN/NMT1                                |
| BP | GO:0046621 | negative regulation of organ growth                                  | 3/189 | 37/18862  | 5.99E-03 | 4.01E-02 | 2.75E-02 | YY1/STK4/G6PD                                       |
| BP | GO:0048713 | regulation of oligodendrocyte differentiation                        | 3/189 | 37/18862  | 5.99E-03 | 4.01E-02 | 2.75E-02 | PPARG/NOTCH1/SHH                                    |
| BP | GO:0090218 | positive regulation of lipid kinase activity                         | 3/189 | 37/18862  | 5.99E-03 | 4.01E-02 | 2.75E-02 | F2/VAV3/PTK2B                                       |
| BP | GO:0002903 | negative regulation of B cell apoptotic process                      | 2/189 | 12/18862  | 6.17E-03 | 4.02E-02 | 2.76E-02 | CD74/IL2                                            |
| BP | GO:0006570 | tyrosine metabolic process                                           | 2/189 | 12/18862  | 6.17E-03 | 4.02E-02 | 2.76E-02 | HPD/PAH                                             |
| BP | GO:0009265 | 2'-deoxyribonucleotide biosynthetic process                          | 2/189 | 12/18862  | 6.17E-03 | 4.02E-02 | 2.76E-02 | DTYMK/DCTD                                          |
| BP | GO:0038110 | interleukin-2-mediated signaling pathway                             | 2/189 | 12/18862  | 6.17E-03 | 4.02E-02 | 2.76E-02 | PTK2B/IL2                                           |
| BP | GO:0043383 | negative T cell selection                                            | 2/189 | 12/18862  | 6.17E-03 | 4.02E-02 | 2.76E-02 | CD74/SHH                                            |
| BP | GO:0046322 | negative regulation of fatty acid oxidation                          | 2/189 | 12/18862  | 6.17E-03 | 4.02E-02 | 2.76E-02 | ACADV1/ACACB                                        |
| BP | GO:0046385 | deoxyribose phosphate biosynthetic process                           | 2/189 | 12/18862  | 6.17E-03 | 4.02E-02 | 2.76E-02 | DTYMK/DCTD                                          |

|    |            |                                                                                |       |           |          |          |          |                                                     |
|----|------------|--------------------------------------------------------------------------------|-------|-----------|----------|----------|----------|-----------------------------------------------------|
| BP | GO:0051095 | regulation of helicase activity                                                | 2/189 | 12/18862  | 6.17E-03 | 4.02E-02 | 2.76E-02 | POT1/MSH2                                           |
| BP | GO:0051549 | positive regulation of keratinocyte migration                                  | 2/189 | 12/18862  | 6.17E-03 | 4.02E-02 | 2.76E-02 | HBEGF/ARF6                                          |
| BP | GO:0060442 | branching involved in prostate gland morphogenesis                             | 2/189 | 12/18862  | 6.17E-03 | 4.02E-02 | 2.76E-02 | ESR1/SHH                                            |
| BP | GO:0060601 | lateral sprouting from an epithelium                                           | 2/189 | 12/18862  | 6.17E-03 | 4.02E-02 | 2.76E-02 | AR/SHH                                              |
| BP | GO:0061052 | negative regulation of cell growth involved in cardiac muscle cell development | 2/189 | 12/18862  | 6.17E-03 | 4.02E-02 | 2.76E-02 | YY1/G6PD                                            |
| BP | GO:0061430 | bone trabecula morphogenesis                                                   | 2/189 | 12/18862  | 6.17E-03 | 4.02E-02 | 2.76E-02 | MMP2/SEMA4D                                         |
| BP | GO:0071801 | regulation of podosome assembly                                                | 2/189 | 12/18862  | 6.17E-03 | 4.02E-02 | 2.76E-02 | HCK/MSN                                             |
| BP | GO:0090085 | regulation of protein deubiquitination                                         | 2/189 | 12/18862  | 6.17E-03 | 4.02E-02 | 2.76E-02 | TRIM21/SART3                                        |
| BP | GO:1903037 | regulation of leukocyte cell-cell adhesion                                     | 9/189 | 330/18862 | 6.19E-03 | 4.02E-02 | 2.76E-02 | RAC1/HLA-DRB1/RARA/IFNG/TNFAIP8L2/DPP4/CD74/IL2/SHH |
| BP | GO:0002292 | T cell differentiation involved in immune response                             | 4/189 | 73/18862  | 6.21E-03 | 4.02E-02 | 2.76E-02 | HLA-DRB1/RARA/IFNG/IL2                              |
| BP | GO:0031100 | animal organ regeneration                                                      | 4/189 | 73/18862  | 6.21E-03 | 4.02E-02 | 2.76E-02 | HMOX1/PPARG/NOTCH1/GLI1                             |
| BP | GO:0005996 | monosaccharide metabolic process                                               | 8/189 | 272/18862 | 6.25E-03 | 4.03E-02 | 2.77E-02 | HK2/EP300/DCXR/PDK2/ACACB/PGK1/G6PD/PDK4            |
| BP | GO:1903034 | regulation of response to wounding                                             | 6/189 | 164/18862 | 6.25E-03 | 4.03E-02 | 2.77E-02 | F2/HBEGF/PTPRF/ALOX12/F3/FAP                        |
| BP | GO:0033044 | regulation of chromosome organization                                          | 8/189 | 273/18862 | 6.38E-03 | 4.08E-02 | 2.80E-02 | POT1/MUC1/SART3/SMG5/HNRNPA2B1/PARN/CTCF/NDC80      |
| BP | GO:0043491 | protein kinase B signaling                                                     | 8/189 | 273/18862 | 6.38E-03 | 4.08E-02 | 2.80E-02 | HBEGF/ESR1/RAC1/IGF1R/HSP90AB1/F3/ERBB4/MAGI2       |

|    |            |                                                                           |        |           |          |          |          |                                                          |
|----|------------|---------------------------------------------------------------------------|--------|-----------|----------|----------|----------|----------------------------------------------------------|
| BP | GO:0002714 | positive regulation of B cell mediated immunity                           | 3/189  | 38/18862  | 6.46E-03 | 4.08E-02 | 2.80E-02 | BTK/MSH2/IL2                                             |
| BP | GO:0002891 | positive regulation of immunoglobulin mediated immune response            | 3/189  | 38/18862  | 6.46E-03 | 4.08E-02 | 2.80E-02 | BTK/MSH2/IL2                                             |
| BP | GO:0009163 | nucleoside biosynthetic process                                           | 3/189  | 38/18862  | 6.46E-03 | 4.08E-02 | 2.80E-02 | NME3/DTYMK/MTAP                                          |
| BP | GO:0009595 | detection of biotic stimulus                                              | 3/189  | 38/18862  | 6.46E-03 | 4.08E-02 | 2.80E-02 | TLR4/FAP/HLA-DRB1                                        |
| BP | GO:0042307 | positive regulation of protein import into nucleus                        | 3/189  | 38/18862  | 6.46E-03 | 4.08E-02 | 2.80E-02 | HSP90AB1/IFNG/SHH                                        |
| BP | GO:0042401 | cellular biogenic amine biosynthetic process                              | 3/189  | 38/18862  | 6.46E-03 | 4.08E-02 | 2.80E-02 | PAH/ODC1/PNMT                                            |
| BP | GO:0045923 | positive regulation of fatty acid metabolic process                       | 3/189  | 38/18862  | 6.46E-03 | 4.08E-02 | 2.80E-02 | PPARG/CD74/NR1H3                                         |
| BP | GO:0051154 | negative regulation of striated muscle cell differentiation               | 3/189  | 38/18862  | 6.46E-03 | 4.08E-02 | 2.80E-02 | NOTCH1/YY1/G6PD                                          |
| BP | GO:0097242 | amyloid-beta clearance                                                    | 3/189  | 38/18862  | 6.46E-03 | 4.08E-02 | 2.80E-02 | IGF1R/IFNGR1/IFNG                                        |
| BP | GO:2000249 | regulation of actin cytoskeleton reorganization                           | 3/189  | 38/18862  | 6.46E-03 | 4.08E-02 | 2.80E-02 | HCK/PTK2B/TJP1                                           |
| BP | GO:0097529 | myeloid leukocyte migration                                               | 7/189  | 218/18862 | 6.51E-03 | 4.11E-02 | 2.82E-02 | VAV3/VEGFB/RAC1/PTK2B/DAPK2/DPP4/CD74                    |
| BP | GO:0048469 | cell maturation                                                           | 6/189  | 166/18862 | 6.62E-03 | 4.17E-02 | 2.86E-02 | BTK/RND1/PTK2B/PPARG/ANG/G6PD                            |
| BP | GO:0045787 | positive regulation of cell cycle                                         | 10/189 | 395/18862 | 6.64E-03 | 4.18E-02 | 2.87E-02 | EP300/MUC1/TRIM21/HSP90AB1/FAP/RARA/APEX1/SFN/NDC80/GLI1 |
| BP | GO:0002220 | innate immune response activating cell surface receptor signaling pathway | 5/189  | 118/18862 | 6.73E-03 | 4.22E-02 | 2.89E-02 | CUL1/EP300/MUC1/SKP1/BTRC                                |
| BP | GO:0002761 | regulation of myeloid leukocyte differentiation                           | 5/189  | 118/18862 | 6.73E-03 | 4.22E-02 | 2.89E-02 | TLR4/HLA-DRB1/RARA/IFNG/CD74                             |

|    |            |                                                                   |       |           |          |          |          |                                             |
|----|------------|-------------------------------------------------------------------|-------|-----------|----------|----------|----------|---------------------------------------------|
| BP | GO:0046916 | cellular transition metal ion homeostasis                         | 5/189 | 118/18862 | 6.73E-03 | 4.22E-02 | 2.89E-02 | CUL1/HMOX1/SKP1/ATP7B/IFNG                  |
| BP | GO:0002200 | somatic diversification of immune receptors                       | 4/189 | 75/18862  | 6.83E-03 | 4.25E-02 | 2.92E-02 | MSH2/YY1/PARP3/IL2                          |
| BP | GO:0006278 | RNA-dependent DNA biosynthetic process                            | 4/189 | 75/18862  | 6.83E-03 | 4.25E-02 | 2.92E-02 | POT1/HSP90AB1/SMG5/PARN                     |
| BP | GO:0043536 | positive regulation of blood vessel endothelial cell migration    | 4/189 | 75/18862  | 6.83E-03 | 4.25E-02 | 2.92E-02 | HMOX1/MAP3K3/HDAC7/ALOX12                   |
| BP | GO:0009309 | amine biosynthetic process                                        | 3/189 | 39/18862  | 6.94E-03 | 4.29E-02 | 2.94E-02 | PAH/ODC1/PNMT                               |
| BP | GO:0032660 | regulation of interleukin-17 production                           | 3/189 | 39/18862  | 6.94E-03 | 4.29E-02 | 2.94E-02 | TLR4/IFNG/IL2                               |
| BP | GO:0045622 | regulation of T-helper cell differentiation                       | 3/189 | 39/18862  | 6.94E-03 | 4.29E-02 | 2.94E-02 | HLA-DRB1/RARA/IL2                           |
| BP | GO:2000279 | negative regulation of DNA biosynthetic process                   | 3/189 | 39/18862  | 6.94E-03 | 4.29E-02 | 2.94E-02 | POT1/PPARG/PARP3                            |
| BP | GO:2000516 | positive regulation of CD4-positive, alpha-beta T cell activation | 3/189 | 39/18862  | 6.94E-03 | 4.29E-02 | 2.94E-02 | HLA-DRB1/RARA/IFNG                          |
| BP | GO:0050868 | negative regulation of T cell activation                          | 5/189 | 119/18862 | 6.97E-03 | 4.30E-02 | 2.95E-02 | HLA-DRB1/TNFAIP8L2/CD74/IL2/SHH             |
| BP | GO:0120254 | NA                                                                | 5/189 | 119/18862 | 6.97E-03 | 4.30E-02 | 2.95E-02 | HSD17B4/ALOX12/CYP2E1/CYP17A1/SRD5A2        |
| BP | GO:0050670 | regulation of lymphocyte proliferation                            | 7/189 | 221/18862 | 7.00E-03 | 4.30E-02 | 2.95E-02 | VAV3/BTK/TLR4/HLA-DRB1/CD74/IL2/SHH         |
| BP | GO:0006805 | xenobiotic metabolic process                                      | 5/189 | 120/18862 | 7.22E-03 | 4.34E-02 | 2.98E-02 | HSP90AB1/SULT1A1/CYP2E1/AOC3/ACY1           |
| BP | GO:0034605 | cellular response to heat                                         | 5/189 | 120/18862 | 7.22E-03 | 4.34E-02 | 2.98E-02 | EP300/HMOX1/HSP90AB1/ATXN3/RPA3             |
| BP | GO:0050708 | regulation of protein secretion                                   | 8/189 | 279/18862 | 7.24E-03 | 4.34E-02 | 2.98E-02 | RAC1/TLR4/HLA-DRB1/IFNG/ANG/DPP4/ARF6/NR1H3 |

|    |            |                                                                                      |       |           |          |          |          |                                      |
|----|------------|--------------------------------------------------------------------------------------|-------|-----------|----------|----------|----------|--------------------------------------|
| BP | GO:0002551 | mast cell chemotaxis                                                                 | 2/189 | 13/18862  | 7.24E-03 | 4.34E-02 | 2.98E-02 | VEGFB/RAC1                           |
| BP | GO:0003161 | cardiac conduction system development                                                | 2/189 | 13/18862  | 7.24E-03 | 4.34E-02 | 2.98E-02 | NOTCH1/DSG2                          |
| BP | GO:0032354 | response to follicle-stimulating hormone                                             | 2/189 | 13/18862  | 7.24E-03 | 4.34E-02 | 2.98E-02 | HMGCS1/NOTCH1                        |
| BP | GO:0038183 | bile acid signaling pathway                                                          | 2/189 | 13/18862  | 7.24E-03 | 4.34E-02 | 2.98E-02 | CYP7A1/ABCC4                         |
| BP | GO:0042762 | regulation of sulfur metabolic process                                               | 2/189 | 13/18862  | 7.24E-03 | 4.34E-02 | 2.98E-02 | PDK2/PDK4                            |
| BP | GO:0048302 | regulation of isotype switching to IgG isotypes                                      | 2/189 | 13/18862  | 7.24E-03 | 4.34E-02 | 2.98E-02 | MSH2/IL2                             |
| BP | GO:0060841 | venous blood vessel development                                                      | 2/189 | 13/18862  | 7.24E-03 | 4.34E-02 | 2.98E-02 | ACVR2B/NOTCH1                        |
| BP | GO:0070424 | regulation of nucleotide-binding oligomerization domain containing signaling pathway | 2/189 | 13/18862  | 7.24E-03 | 4.34E-02 | 2.98E-02 | TLR4/XIAP                            |
| BP | GO:0070486 | leukocyte aggregation                                                                | 2/189 | 13/18862  | 7.24E-03 | 4.34E-02 | 2.98E-02 | MSN/SEMA4D                           |
| BP | GO:0071352 | cellular response to interleukin-2                                                   | 2/189 | 13/18862  | 7.24E-03 | 4.34E-02 | 2.98E-02 | PTK2B/IL2                            |
| BP | GO:0071635 | negative regulation of transforming growth factor beta production                    | 2/189 | 13/18862  | 7.24E-03 | 4.34E-02 | 2.98E-02 | HSP90AB1/FN1                         |
| BP | GO:1902947 | regulation of tau-protein kinase activity                                            | 2/189 | 13/18862  | 7.24E-03 | 4.34E-02 | 2.98E-02 | HSP90AB1/IFNG                        |
| BP | GO:1904668 | positive regulation of ubiquitin protein ligase activity                             | 2/189 | 13/18862  | 7.24E-03 | 4.34E-02 | 2.98E-02 | SKP1/BTRC                            |
| BP | GO:0016064 | immunoglobulin mediated immune response                                              | 7/189 | 223/18862 | 7.34E-03 | 4.38E-02 | 3.00E-02 | BTK/MSH2/HLA-DRB1/C1R/PARP3/CD74/IL2 |
| BP | GO:0032944 | regulation of mononuclear cell proliferation                                         | 7/189 | 223/18862 | 7.34E-03 | 4.38E-02 | 3.00E-02 | VAV3/BTK/TLR4/HLA-DRB1/CD74/IL2/SHH  |

|    |            |                                                     |       |           |          |          |          |                                                        |
|----|------------|-----------------------------------------------------|-------|-----------|----------|----------|----------|--------------------------------------------------------|
| BP | GO:0002819 | regulation of adaptive immune response              | 6/189 | 170/18862 | 7.41E-03 | 4.39E-02 | 3.01E-02 | BTK/MSH2/B2M/HLA-DRB1/PARP3/IL2                        |
| BP | GO:0048639 | positive regulation of developmental growth         | 6/189 | 170/18862 | 7.41E-03 | 4.39E-02 | 3.01E-02 | ACACB/ERBB4/NOTCH1/FN1/SEMA4D/GLI1                     |
| BP | GO:0009262 | deoxyribonucleotide metabolic process               | 3/189 | 40/18862  | 7.45E-03 | 4.39E-02 | 3.01E-02 | RRM1/DTYMK/DCTD                                        |
| BP | GO:0055023 | positive regulation of cardiac muscle tissue growth | 3/189 | 40/18862  | 7.45E-03 | 4.39E-02 | 3.01E-02 | ERBB4/NOTCH1/GLI1                                      |
| BP | GO:0060443 | mammary gland morphogenesis                         | 3/189 | 40/18862  | 7.45E-03 | 4.39E-02 | 3.01E-02 | AR/ESR1/BTRC                                           |
| BP | GO:0072528 | pyrimidine-containing compound biosynthetic process | 3/189 | 40/18862  | 7.45E-03 | 4.39E-02 | 3.01E-02 | NME3/DTYMK/DCTD                                        |
| BP | GO:1904591 | positive regulation of protein import               | 3/189 | 40/18862  | 7.45E-03 | 4.39E-02 | 3.01E-02 | HSP90AB1/IFNG/SHH                                      |
| BP | GO:2000008 | regulation of protein localization to cell surface  | 3/189 | 40/18862  | 7.45E-03 | 4.39E-02 | 3.01E-02 | HSP90AB1/ERBB4/ARF6                                    |
| BP | GO:0016042 | lipid catabolic process                             | 9/189 | 340/18862 | 7.46E-03 | 4.39E-02 | 3.01E-02 | HSD17B4/ACADVL/FABP3/CYP7A1/ACACB/ALK/ECI2/ECHS1/YWHAH |
| BP | GO:0051205 | protein insertion into membrane                     | 4/189 | 77/18862  | 7.48E-03 | 4.40E-02 | 3.02E-02 | YWHAQ/YWHAH/SFN/NMT1                                   |
| BP | GO:0001659 | temperature homeostasis                             | 6/189 | 171/18862 | 7.61E-03 | 4.47E-02 | 3.06E-02 | ACADVL/IGF1R/ACVR2B/TLR4/NOTCH1/NR1H3                  |
| BP | GO:0046651 | lymphocyte proliferation                            | 8/189 | 282/18862 | 7.70E-03 | 4.51E-02 | 3.09E-02 | VAV3/BTK/MSN/TLR4/HLA-DRB1/CD74/IL2/SHH                |
| BP | GO:0019724 | B cell mediated immunity                            | 7/189 | 226/18862 | 7.87E-03 | 4.61E-02 | 3.16E-02 | BTK/MSH2/HLA-DRB1/C1R/PARP3/CD74/IL2                   |
| BP | GO:0032689 | negative regulation of interferon-gamma production  | 3/189 | 41/18862  | 7.98E-03 | 4.64E-02 | 3.18E-02 | TLR4/HLA-DRB1/RARA                                     |
| BP | GO:0033574 | response to testosterone                            | 3/189 | 41/18862  | 7.98E-03 | 4.64E-02 | 3.18E-02 | AR/MTAP/MSN                                            |
| BP | GO:0046596 | regulation of viral entry into host cell            | 3/189 | 41/18862  | 7.98E-03 | 4.64E-02 | 3.18E-02 | TRIM21/HLA-DRB1/CD74                                   |

|    |            |                                                                         |       |           |          |          |          |                                              |
|----|------------|-------------------------------------------------------------------------|-------|-----------|----------|----------|----------|----------------------------------------------|
| BP | GO:0007498 | mesoderm development                                                    | 5/189 | 123/18862 | 7.99E-03 | 4.64E-02 | 3.18E-02 | NF2/BTK/HCK/ITGB3/SHH                        |
| BP | GO:1990266 | neutrophil migration                                                    | 5/189 | 123/18862 | 7.99E-03 | 4.64E-02 | 3.18E-02 | VAV3/RAC1/DAPK2/DPP4/CD74                    |
| BP | GO:0061138 | morphogenesis of a branching epithelium                                 | 6/189 | 173/18862 | 8.04E-03 | 4.66E-02 | 3.20E-02 | AR/ESR1/NOTCH1/BTRC/STK4/SHH                 |
| BP | GO:0032943 | mononuclear cell proliferation                                          | 8/189 | 285/18862 | 8.18E-03 | 4.73E-02 | 3.24E-02 | VAV3/BTK/MSN/TLR4/HLA-DRB1/CD74/IL2/SHH      |
| BP | GO:0032204 | regulation of telomere maintenance                                      | 4/189 | 79/18862  | 8.18E-03 | 4.73E-02 | 3.24E-02 | POT1/SMG5/HNRNPA2B1/PARN                     |
| BP | GO:0009266 | response to temperature stimulus                                        | 7/189 | 228/18862 | 8.24E-03 | 4.73E-02 | 3.24E-02 | EP300/ACADVL/HMOX1/HSP90AB1/ATXN3/RPA3/PPARG |
| BP | GO:2000045 | regulation of G1/S transition of mitotic cell cycle                     | 6/189 | 174/18862 | 8.26E-03 | 4.73E-02 | 3.24E-02 | EP300/MUC1/SEN2/WEE1/APEX1/SFN               |
| BP | GO:0006721 | terpenoid metabolic process                                             | 5/189 | 124/18862 | 8.26E-03 | 4.73E-02 | 3.24E-02 | HMGCS1/TTR/ADH1C/CYP2E1/GGPS1                |
| BP | GO:0051053 | negative regulation of DNA metabolic process                            | 5/189 | 124/18862 | 8.26E-03 | 4.73E-02 | 3.24E-02 | POT1/DFFA/MSH2/PPARG/PARP3                   |
| BP | GO:0071621 | granulocyte chemotaxis                                                  | 5/189 | 124/18862 | 8.26E-03 | 4.73E-02 | 3.24E-02 | VAV3/RAC1/DAPK2/DPP4/CD74                    |
| BP | GO:0003413 | chondrocyte differentiation involved in endochondral bone morphogenesis | 2/189 | 14/18862  | 8.40E-03 | 4.73E-02 | 3.24E-02 | RARG/ANXA6                                   |
| BP | GO:0010935 | regulation of macrophage cytokine production                            | 2/189 | 14/18862  | 8.40E-03 | 4.73E-02 | 3.24E-02 | TLR4/CD74                                    |
| BP | GO:0032966 | negative regulation of collagen biosynthetic process                    | 2/189 | 14/18862  | 8.40E-03 | 4.73E-02 | 3.24E-02 | CYP7A1/PPARG                                 |
| BP | GO:0036295 | cellular response to increased oxygen levels                            | 2/189 | 14/18862  | 8.40E-03 | 4.73E-02 | 3.24E-02 | FAS/PPARG                                    |
| BP | GO:0045059 | positive thymic T cell selection                                        | 2/189 | 14/18862  | 8.40E-03 | 4.73E-02 | 3.24E-02 | CD74/SHH                                     |



|    |            |                                                    |        |           |          |          |          |                                                             |
|----|------------|----------------------------------------------------|--------|-----------|----------|----------|----------|-------------------------------------------------------------|
| BP | GO:0048291 | isotype switching to IgG isotypes                  | 2/189  | 14/18862  | 8.40E-03 | 4.73E-02 | 3.24E-02 | MSH2/IL2                                                    |
| BP | GO:0051547 | regulation of keratinocyte migration               | 2/189  | 14/18862  | 8.40E-03 | 4.73E-02 | 3.24E-02 | HBEGF/ARF6                                                  |
| BP | GO:0051917 | regulation of fibrinolysis                         | 2/189  | 14/18862  | 8.40E-03 | 4.73E-02 | 3.24E-02 | F2/FAP                                                      |
| BP | GO:0070141 | response to UV-A                                   | 2/189  | 14/18862  | 8.40E-03 | 4.73E-02 | 3.24E-02 | MMP2/MMP1                                                   |
| BP | GO:0070669 | response to interleukin-2                          | 2/189  | 14/18862  | 8.40E-03 | 4.73E-02 | 3.24E-02 | PTK2B/IL2                                                   |
| BP | GO:0097284 | hepatocyte apoptotic process                       | 2/189  | 14/18862  | 8.40E-03 | 4.73E-02 | 3.24E-02 | STK4/ARF6                                                   |
| BP | GO:0097531 | mast cell migration                                | 2/189  | 14/18862  | 8.40E-03 | 4.73E-02 | 3.24E-02 | VEGFB/RAC1                                                  |
| BP | GO:0042110 | T cell activation                                  | 11/189 | 474/18862 | 8.45E-03 | 4.74E-02 | 3.25E-02 | RAC1/MSN/B2M/HLA-DRB1/RARA/IFNG/TNFAIP8L2/DPP4/CD74/IL2/SHH |
| BP | GO:0009152 | purine ribonucleotide biosynthetic process         | 6/189  | 175/18862 | 8.48E-03 | 4.74E-02 | 3.25E-02 | NME3/PAPSS1/PDK2/ACACB/GART/PDK4                            |
| BP | GO:0052126 | movement in host environment                       | 6/189  | 175/18862 | 8.48E-03 | 4.74E-02 | 3.25E-02 | TRIM21/WWP1/ITGB3/HLA-DRB1/DPP4/CD74                        |
| BP | GO:0014002 | astrocyte development                              | 3/189  | 42/18862  | 8.53E-03 | 4.74E-02 | 3.25E-02 | TLR4/IFNGR1/IFNG                                            |
| BP | GO:0031670 | cellular response to nutrient                      | 3/189  | 42/18862  | 8.53E-03 | 4.74E-02 | 3.25E-02 | HMOX1/PDK2/PPARG                                            |
| BP | GO:0032965 | regulation of collagen biosynthetic process        | 3/189  | 42/18862  | 8.53E-03 | 4.74E-02 | 3.25E-02 | F2/CYP7A1/PPARG                                             |
| BP | GO:0045687 | positive regulation of glial cell differentiation  | 3/189  | 42/18862  | 8.53E-03 | 4.74E-02 | 3.25E-02 | PPARG/NOTCH1/SHH                                            |
| BP | GO:1901659 | glycosyl compound biosynthetic process             | 3/189  | 42/18862  | 8.53E-03 | 4.74E-02 | 3.25E-02 | NME3/DTYMK/MTAP                                             |
| BP | GO:0002705 | positive regulation of leukocyte mediated immunity | 5/189  | 125/18862 | 8.54E-03 | 4.74E-02 | 3.25E-02 | BTK/MSH2/B2M/HLA-DRB1/IL2                                   |

|    |            |                                                    |       |           |          |          |          |                                                   |
|----|------------|----------------------------------------------------|-------|-----------|----------|----------|----------|---------------------------------------------------|
| BP | GO:0071466 | cellular response to xenobiotic stimulus           | 5/189 | 125/18862 | 8.54E-03 | 4.74E-02 | 3.25E-02 | HSP90AB1/SULT1A1/CYP2E1/AOC3/ACY1                 |
| BP | GO:0007160 | cell-matrix adhesion                               | 7/189 | 230/18862 | 8.62E-03 | 4.77E-02 | 3.27E-02 | NF2/RAC1/EPHA3/PTK2B/BCR/ITGB3/FN1                |
| BP | GO:2000116 | regulation of cysteine-type endopeptidase activity | 7/189 | 230/18862 | 8.62E-03 | 4.77E-02 | 3.27E-02 | ALOX12/F3/FAS/PPARG/XIAP/SFN/DHCR24               |
| BP | GO:0044262 | cellular carbohydrate metabolic process            | 8/189 | 288/18862 | 8.68E-03 | 4.80E-02 | 3.29E-02 | HK2/EP300/PTK2B/PYGL/PDK2/ITPK1/ACACB/PDK4        |
| BP | GO:0010921 | regulation of phosphatase activity                 | 6/189 | 176/18862 | 8.71E-03 | 4.80E-02 | 3.29E-02 | PPP2R1A/HSP90AB1/MAGI2/IFNG/B3GAT3/SEMA4D         |
| BP | GO:0048762 | mesenchymal cell differentiation                   | 7/189 | 231/18862 | 8.82E-03 | 4.85E-02 | 3.33E-02 | EPHA3/ERBB4/ANXA6/NOTCH1/FN1/SEMA4D/SHH           |
| BP | GO:0045471 | response to ethanol                                | 5/189 | 126/18862 | 8.82E-03 | 4.85E-02 | 3.33E-02 | PTK2B/CYP7A1/CYP2E1/G6PD/IL2                      |
| BP | GO:0043367 | CD4-positive, alpha-beta T cell differentiation    | 4/189 | 81/18862  | 8.92E-03 | 4.88E-02 | 3.35E-02 | HLA-DRB1/RARA/IFNG/IL2                            |
| BP | GO:0050672 | negative regulation of lymphocyte proliferation    | 4/189 | 81/18862  | 8.92E-03 | 4.88E-02 | 3.35E-02 | BTK/HLA-DRB1/IL2/SHH                              |
| BP | GO:0032386 | regulation of intracellular transport              | 9/189 | 350/18862 | 8.93E-03 | 4.88E-02 | 3.35E-02 | HSP90AB1/MSN/YWHAQ/IFNG/B3GAT3/YWHAH/SFN/NMT1/SHH |
| BP | GO:0001936 | regulation of endothelial cell proliferation       | 6/189 | 177/18862 | 8.94E-03 | 4.88E-02 | 3.35E-02 | HMOX1/VEGFB/F3/ITGB3/PPARG/ANG                    |
| BP | GO:0001959 | regulation of cytokine-mediated signaling pathway  | 6/189 | 177/18862 | 8.94E-03 | 4.88E-02 | 3.35E-02 | HSP90AB1/IFNGR1/PPARG/IFNG/CD74/NR1H3             |
| BP | GO:0021762 | substantia nigra development                       | 3/189 | 43/18862  | 9.11E-03 | 4.93E-02 | 3.38E-02 | YWHAQ/YWHAH/G6PD                                  |
| BP | GO:0032620 | interleukin-17 production                          | 3/189 | 43/18862  | 9.11E-03 | 4.93E-02 | 3.38E-02 | TLR4/IFNG/IL2                                     |
| BP | GO:0046189 | phenol-containing compound biosynthetic process    | 3/189 | 43/18862  | 9.11E-03 | 4.93E-02 | 3.38E-02 | ZEB2/PAH/PNMT                                     |
| BP | GO:0061383 | trabecula morphogenesis                            | 3/189 | 43/18862  | 9.11E-03 | 4.93E-02 | 3.38E-02 | MMP2/NOTCH1/SEMA4D                                |

|    |            |                                                       |        |           |          |          |          |                                                                               |
|----|------------|-------------------------------------------------------|--------|-----------|----------|----------|----------|-------------------------------------------------------------------------------|
| BP | GO:2000273 | positive regulation of signaling receptor activity    | 3/189  | 43/18862  | 9.11E-03 | 4.93E-02 | 3.38E-02 | HBEGF/NCOA3/IFNG                                                              |
| BP | GO:0014066 | regulation of phosphatidylinositol 3-kinase signaling | 5/189  | 127/18862 | 9.11E-03 | 4.93E-02 | 3.38E-02 | F2/IGF1R/ERBB4/FN1/SEMA4D                                                     |
| BP | GO:0097305 | response to alcohol                                   | 7/189  | 233/18862 | 9.22E-03 | 4.98E-02 | 3.42E-02 | HMGCS1/PTK2B/CYP7A1/CYP2E1/PPARG/G6PD/IL2                                     |
| CC | GO:0045177 | apical part of cell                                   | 14/191 | 414/19520 | 1.47E-05 | 4.89E-03 | 4.01E-03 | NF2/MUC1/HSP90AB1/MSN/ITPK1/FAP/NOTCH1/TJP1/DPP4/DSG2/FN1/CLCN5/SLC5A1/NPC1L1 |
| CC | GO:0005667 | transcription factor complex                          | 12/191 | 365/19520 | 2.41E-05 | 4.89E-03 | 4.01E-03 | APEX1/EP300/XRCC6/HSP90AB1/NFATC1/POU2F1/PPARG/RARA/RARG/TAF13/YY1/NR1H3      |
| CC | GO:0031091 | platelet alpha granule                                | 6/191  | 91/19520  | 2.71E-04 | 4.07E-02 | 3.34E-02 | VEGFB/ITGB3/SERPINA5/ALB/THBS2/FN1                                            |
| CC | GO:0072562 | blood microparticle                                   | 7/191  | 146/19520 | 5.94E-04 | 4.07E-02 | 3.34E-02 | F2/HBB/GC/MSN/ALB/C1R/FN1                                                     |
| CC | GO:0031527 | filopodium membrane                                   | 3/191  | 18/19520  | 6.75E-04 | 4.07E-02 | 3.34E-02 | NF2/ITGB3/ARF6                                                                |
| CC | GO:0016324 | apical plasma membrane                                | 11/191 | 351/19520 | 7.06E-04 | 4.07E-02 | 3.34E-02 | MUC1/HSP90AB1/MSN/ITPK1/NOTCH1/DPP4/DSG2/FN1/SLC5A1/NPC1L1/ABCC4              |
| CC | GO:0005925 | focal adhesion                                        | 12/191 | 416/19520 | 8.43E-04 | 4.07E-02 | 3.34E-02 | RAC1/HCK/PTK2B/FLNB/MSN/B2M/YWHAQ/ITGB3/FAP/ANXA6/DPP4/ARF6                   |
| CC | GO:0030055 | cell-substrate junction                               | 12/191 | 423/19520 | 9.73E-04 | 4.07E-02 | 3.34E-02 | RAC1/HCK/PTK2B/FLNB/MSN/B2M/YWHAQ/ITGB3/FAP/ANXA6/DPP4/ARF6                   |
| CC | GO:0031258 | lamellipodium membrane                                | 3/191  | 22/19520  | 1.24E-03 | 4.07E-02 | 3.34E-02 | ITGB3/FAP/DPP4                                                                |
| CC | GO:0034774 | secretory granule lumen                               | 10/191 | 322/19520 | 1.31E-03 | 4.07E-02 | 3.34E-02 | XRCC6/VEGFB/HSP90AB1/PYGL/TTR/BPI/B2M/PA2G4/ALB/FN1                           |
| CC | GO:0060205 | cytoplasmic vesicle lumen                             | 10/191 | 326/19520 | 1.44E-03 | 4.07E-02 | 3.34E-02 | XRCC6/VEGFB/HSP90AB1/PYGL/TTR/BPI/B2M/PA2G4/ALB/FN1                           |
| CC | GO:0031983 | vesicle lumen                                         | 10/191 | 328/19520 | 1.51E-03 | 4.07E-02 | 3.34E-02 | XRCC6/VEGFB/HSP90AB1/PYGL/TTR/BPI/B2M/PA2G4/ALB/FN1                           |

|    |            |                                  |        |           |          |          |          |                                                                                       |
|----|------------|----------------------------------|--------|-----------|----------|----------|----------|---------------------------------------------------------------------------------------|
| CC | GO:0005775 | vacuolar lumen                   | 7/191  | 173/19520 | 1.60E-03 | 4.07E-02 | 3.34E-02 | GC/TTR/BPI/PSAP/PA2G4/DAPK2/CD74                                                      |
| CC | GO:0001726 | ruffle                           | 7/191  | 175/19520 | 1.71E-03 | 4.07E-02 | 3.34E-02 | NF2/RAC1/TLR4/ITGB3/FAP/S100A6/ARF6                                                   |
| CC | GO:0042611 | MHC protein complex              | 3/191  | 25/19520  | 1.81E-03 | 4.07E-02 | 3.34E-02 | B2M/HLA-DRB1/CD74                                                                     |
| CC | GO:0031253 | cell projection membrane         | 10/191 | 337/19520 | 1.84E-03 | 4.07E-02 | 3.34E-02 | NF2/RAC1/HSP90AB1/MSN/ITGB3/FAP/DPP4/ARF6/SLC5A1/NPC1L1                               |
| MF | GO:0033293 | monocarboxylic acid binding      | 8/191  | 71/18337  | 7.27E-07 | 4.13E-04 | 3.35E-04 | FABP3/PYGL/PSAP/ACACB/PPARG/SERPINA5/RARA/ALB                                         |
| MF | GO:0004713 | protein tyrosine kinase activity | 10/191 | 135/18337 | 1.52E-06 | 4.31E-04 | 3.49E-04 | BTK/HCK/EPHA3/PTK2B/IGF1R/MATK/CLK1/WEE1/ERBB4/ALK                                    |
| MF | GO:0043177 | organic acid binding             | 8/191  | 114/18337 | 2.57E-05 | 1.83E-03 | 1.48E-03 | HMGCS1/FABP3/HBB/ACACB/GAD2/PPARG/SERPINA5/RARA                                       |
| MF | GO:0042162 | telomeric DNA binding            | 5/191  | 36/18337  | 3.37E-05 | 2.13E-03 | 1.73E-03 | POT1/XRCC6/SMG5/HNRNPA2B1/APEX1                                                       |
| MF | GO:0033218 | amide binding                    | 14/191 | 391/18337 | 6.34E-05 | 3.04E-03 | 2.46E-03 | ACADVL/IGF1R/HSP90AB1/PSAP/TLR4/PEX5/ACACB/HLA-DRB1/NFATC1/PPARG/ANG/ECI2/CD74/DHCR24 |
| MF | GO:0003684 | damaged DNA binding              | 6/191  | 66/18337  | 6.38E-05 | 3.04E-03 | 2.46E-03 | POT1/EP300/XRCC6/MSH2/RPA3/APEX1                                                      |
| MF | GO:0016922 | nuclear receptor binding         | 7/191  | 97/18337  | 6.94E-05 | 3.04E-03 | 2.46E-03 | RARG/EP300/ESR1/NCOA3/PPARG/PRKCB/YWHAH                                               |
| MF | GO:0002020 | protease binding                 | 8/191  | 131/18337 | 6.94E-05 | 3.04E-03 | 2.46E-03 | F3/SART3/PSAP/ITGB3/FAP/SERPINA5/DPP4/FN1                                             |
| MF | GO:0005496 | steroid binding                  | 7/191  | 100/18337 | 8.43E-05 | 3.43E-03 | 2.78E-03 | AR/ESR1/GC/ANXA6/SERPINA6/NR1H3/SHBG                                                  |
| MF | GO:0005536 | glucose binding                  | 3/191  | 10/18337  | 1.26E-04 | 4.79E-03 | 3.88E-03 | HK2/PYGL/G6PD                                                                         |
| MF | GO:0031406 | carboxylic acid binding          | 9/191  | 184/18337 | 1.36E-04 | 4.79E-03 | 3.88E-03 | FABP3/PYGL/PSAP/ACACB/GAD2/PPARG/SERPINA5/RARA/ALB                                    |
| MF | GO:0005539 | glycosaminoglycan binding        | 10/191 | 228/18337 | 1.43E-04 | 4.79E-03 | 3.88E-03 | F2/HBEGF/VEGFB/PTPRF/ANXA6/SERPINA5/ANG/THBS2/FN1/SHH                                 |

|    |            |                                                                                       |        |           |          |          |          |                                                            |
|----|------------|---------------------------------------------------------------------------------------|--------|-----------|----------|----------|----------|------------------------------------------------------------|
| MF | GO:0016616 | oxidoreductase activity, acting on the CH-OH group of donors, NAD or NADP as acceptor | 7/191  | 120/18337 | 2.63E-04 | 7.88E-03 | 6.38E-03 | HSD17B4/DCXR/ADH1C/G6PD/GRHPR/ABCC4/SRD5A2                 |
| MF | GO:0008201 | heparin binding                                                                       | 8/191  | 164/18337 | 3.27E-04 | 9.32E-03 | 7.55E-03 | F2/HBEGF/VEGFB/PTPRF/SERPINA5/ANG/THBS2/FN1                |
| MF | GO:0005154 | epidermal growth factor receptor binding                                              | 4/191  | 33/18337  | 3.68E-04 | 9.96E-03 | 8.07E-03 | HBEGF/VAV3/ERBB4/SNX1                                      |
| MF | GO:0004252 | serine-type endopeptidase activity                                                    | 8/191  | 168/18337 | 3.85E-04 | 9.96E-03 | 8.07E-03 | F2/MMP2/KLK1/F3/FAP/MMP1/DPP4/C1R                          |
| MF | GO:0097718 | disordered domain specific binding                                                    | 4/191  | 34/18337  | 4.14E-04 | 1.02E-02 | 8.23E-03 | RRM1/HSP90AB1/NCOA3/FN1                                    |
| MF | GO:0016614 | oxidoreductase activity, acting on CH-OH group of donors                              | 7/191  | 130/18337 | 4.28E-04 | 1.02E-02 | 8.23E-03 | HSD17B4/DCXR/ADH1C/G6PD/GRHPR/ABCC4/SRD5A2                 |
| MF | GO:0000217 | DNA secondary structure binding                                                       | 4/191  | 36/18337  | 5.18E-04 | 1.18E-02 | 9.55E-03 | POT1/MSH2/YY1/HMGB3                                        |
| MF | GO:0061629 | RNA polymerase II sequence-specific DNA-binding transcription factor binding          | 10/191 | 271/18337 | 5.67E-04 | 1.24E-02 | 1.01E-02 | RARG/EP300/ESR1/GTF2I/NCOA3/EXOSC9/PPARG/APEX1/PRKCB/YWHAH |
| MF | GO:0035257 | nuclear hormone receptor binding                                                      | 7/191  | 140/18337 | 6.67E-04 | 1.29E-02 | 1.05E-02 | RARG/EP300/ESR1/NCOA3/PPARG/PRKCB/YWHAH                    |
| MF | GO:0000400 | four-way junction DNA binding                                                         | 3/191  | 17/18337  | 6.79E-04 | 1.29E-02 | 1.05E-02 | MSH2/YY1/HMGB3                                             |
| MF | GO:0023026 | MHC class II protein complex binding                                                  | 3/191  | 17/18337  | 6.79E-04 | 1.29E-02 | 1.05E-02 | HSP90AB1/HLA-DRB1/CD74                                     |
| MF | GO:0070851 | growth factor receptor binding                                                        | 7/191  | 141/18337 | 6.96E-04 | 1.29E-02 | 1.05E-02 | HBEGF/VAV3/VEGFB/ERBB4/ITGB3/SNX1/IL2                      |
| MF | GO:0019825 | oxygen binding                                                                        | 4/191  | 39/18337  | 7.05E-04 | 1.29E-02 | 1.05E-02 | HBB/CYP2E1/ALB/CYP17A1                                     |
| MF | GO:0008022 | protein C-terminus binding                                                            | 8/191  | 185/18337 | 7.28E-04 | 1.29E-02 | 1.05E-02 | EP300/XRCC6/PTK2B/MSH2/YWHAQ/PPARG/TAF13/FN1               |
| MF | GO:0008236 | serine-type peptidase activity                                                        | 8/191  | 186/18337 | 7.54E-04 | 1.30E-02 | 1.05E-02 | F2/MMP2/KLK1/F3/FAP/MMP1/DPP4/C1R                          |

|    |            |                                                         |       |           |          |          |          |                                         |
|----|------------|---------------------------------------------------------|-------|-----------|----------|----------|----------|-----------------------------------------|
| MF | GO:0017171 | serine hydrolase activity                               | 8/191 | 188/18337 | 8.09E-04 | 1.34E-02 | 1.08E-02 | F2/MMP2/KLK1/F3/FAP/MMP1/DPP4/C1R       |
| MF | GO:0019842 | vitamin binding                                         | 7/191 | 145/18337 | 8.21E-04 | 1.34E-02 | 1.08E-02 | RBP5/GC/PYGL/ACACB/GAD2/ALB/OAT         |
| MF | GO:0035258 | steroid hormone receptor binding                        | 5/191 | 77/18337  | 1.25E-03 | 1.98E-02 | 1.61E-02 | EP300/ESR1/PPARG/PRKCB/YWHAH            |
| MF | GO:0033613 | activating transcription factor binding                 | 5/191 | 78/18337  | 1.33E-03 | 2.04E-02 | 1.65E-02 | EP300/HDAC7/GTF2I/EXOSC9/PPARG          |
| MF | GO:0019199 | transmembrane receptor protein kinase activity          | 5/191 | 80/18337  | 1.49E-03 | 2.23E-02 | 1.80E-02 | EPHA3/IGF1R/ACVR2B/ERBB4/ALK            |
| MF | GO:0001224 | RNA polymerase II transcription cofactor binding        | 3/191 | 24/18337  | 1.92E-03 | 2.77E-02 | 2.24E-02 | AR/ESR1/NFATC1                          |
| MF | GO:0008013 | beta-catenin binding                                    | 5/191 | 85/18337  | 1.95E-03 | 2.77E-02 | 2.24E-02 | EP300/AR/ESR1/SKP1/BTRC                 |
| MF | GO:0051427 | hormone receptor binding                                | 7/191 | 173/18337 | 2.27E-03 | 3.15E-02 | 2.55E-02 | RARG/EP300/ESR1/NCOA3/PPARG/PRKCB/YWHAH |
| MF | GO:0001223 | transcription coactivator binding                       | 3/191 | 26/18337  | 2.42E-03 | 3.21E-02 | 2.60E-02 | AR/ESR1/NFATC1                          |
| MF | GO:0023023 | MHC protein complex binding                             | 3/191 | 26/18337  | 2.42E-03 | 3.21E-02 | 2.60E-02 | HSP90AB1/HLA-DRB1/CD74                  |
| MF | GO:0030170 | pyridoxal phosphate binding                             | 4/191 | 55/18337  | 2.57E-03 | 3.25E-02 | 2.63E-02 | PYGL/GAD2/ALB/OAT                       |
| MF | GO:0070279 | vitamin B6 binding                                      | 4/191 | 55/18337  | 2.57E-03 | 3.25E-02 | 2.63E-02 | PYGL/GAD2/ALB/OAT                       |
| MF | GO:0005507 | copper ion binding                                      | 4/191 | 60/18337  | 3.53E-03 | 4.37E-02 | 3.54E-02 | ATP7B/AOC3/ANG/ALB                      |
| MF | GO:0004714 | transmembrane receptor protein tyrosine kinase activity | 4/191 | 61/18337  | 3.75E-03 | 4.54E-02 | 3.68E-02 | EPHA3/IGF1R/ERBB4/ALK                   |
| MF | GO:0001530 | lipopolysaccharide binding                              | 3/191 | 32/18337  | 4.42E-03 | 4.84E-02 | 3.92E-02 | F2/BPI/TLR4                             |
| MF | GO:0031490 | chromatin DNA binding                                   | 5/191 | 103/18337 | 4.47E-03 | 4.84E-02 | 3.92E-02 | EP300/NOTCH1/RARA/CTCF/APEX1            |

|    |            |                                     |       |          |          |          |          |                |
|----|------------|-------------------------------------|-------|----------|----------|----------|----------|----------------|
| MF | GO:0004300 | enoyl-CoA hydratase activity        | 2/191 | 10/18337 | 4.60E-03 | 4.84E-02 | 3.92E-02 | HSD17B4/ECHS1  |
| MF | GO:0008239 | dipeptidyl-peptidase activity       | 2/191 | 10/18337 | 4.60E-03 | 4.84E-02 | 3.92E-02 | FAP/DPP4       |
| MF | GO:0032356 | oxidized DNA binding                | 2/191 | 10/18337 | 4.60E-03 | 4.84E-02 | 3.92E-02 | POT1/MSH2      |
| MF | GO:0043208 | glycosphingolipid binding           | 2/191 | 10/18337 | 4.60E-03 | 4.84E-02 | 3.92E-02 | PSAP/IL2       |
| MF | GO:0098505 | G-rich strand telomeric DNA binding | 2/191 | 10/18337 | 4.60E-03 | 4.84E-02 | 3.92E-02 | POT1/HNRNPA2B1 |

**Note:** KEGG, Kyoto Encyclopedia of Genes and Genomes; GO, Gene Ontology; BC, Bladder Carcinoma; BP, biological process; CC, cellular component; MF, molecular function

**Supplementary Table S9: Binding free energy during 200ns molecular docking simulation of NRP1 docking with solasonine.**

| <b>Binding free energy during 200ns MDS of NRP1 docking with solasonine.</b> |                |                      |                  |                      |                      |  |
|------------------------------------------------------------------------------|----------------|----------------------|------------------|----------------------|----------------------|--|
| #Frame                                                                       | Residue number | MMPBSA<br>(kcal/mol) | MM<br>(kcal/mol) | MM_VDW<br>(kcal/mol) | MM_COU<br>(kcal/mol) |  |
| P~1PHE                                                                       | 273            | 0.226                | 0.226            | 0                    | 0.227                |  |
| P~2LYS                                                                       | 274            | 0.197                | 0.197            | 0                    | 0.197                |  |
| P~3CYS                                                                       | 275            | -0.013               | -0.013           | 0                    | -0.013               |  |
| P~4MET                                                                       | 276            | 0.004                | 0.004            | 0                    | 0.005                |  |
| P~5GLU                                                                       | 277            | -0.204               | -0.204           | 0                    | -0.203               |  |
| P~6ALA                                                                       | 278            | 0.016                | 0.016            | 0                    | 0.017                |  |
| P~7LEU                                                                       | 279            | 0.017                | 0.017            | -0.001               | 0.018                |  |
| P~8GLY                                                                       | 280            | 0.016                | 0.016            | 0                    | 0.017                |  |
| P~9MET                                                                       | 281            | 0.039                | 0.039            | -0.003               | 0.043                |  |
| P~10GLU                                                                      | 282            | -0.244               | -0.244           | -0.002               | -0.242               |  |
| P~11SER                                                                      | 283            | 0.005                | 0.005            | -0.001               | 0.006                |  |
| P~12GLY                                                                      | 284            | 0.018                | 0.018            | -0.001               | 0.018                |  |
| P~13GLU                                                                      | 285            | -0.155               | -0.155           | -0.001               | -0.154               |  |
| P~14ILE                                                                      | 286            | 0.003                | 0.003            | -0.002               | 0.005                |  |
| P~15HIS                                                                      | 287            | -0.051               | -0.051           | -0.002               | -0.05                |  |
| P~16SER                                                                      | 288            | -0.06                | -0.06            | -0.002               | -0.057               |  |
| P~17ASP                                                                      | 289            | -0.02                | -0.02            | -0.002               | -0.019               |  |
| P~18GLN                                                                      | 290            | 0.002                | 0.002            | -0.002               | 0.004                |  |
| P~19ILE                                                                      | 291            | 0.034                | 0.034            | -0.006               | 0.039                |  |
| P~20THR                                                                      | 292            | -0.038               | -0.038           | -0.006               | -0.031               |  |
| P~21ALA                                                                      | 293            | 0.103                | 0.103            | -0.015               | 0.118                |  |
| P~22SER                                                                      | 294            | 0.044                | 0.044            | -0.028               | 0.072                |  |
| P~23SER                                                                      | 295            | -0.498               | -0.498           | -0.117               | -0.381               |  |
| P~24GLN                                                                      | 296            | -0.018               | -0.018           | -0.157               | 0.138                |  |
| P~25TYR                                                                      | 297            | -8.053               | -8.053           | -10.726              | 2.673                |  |
| P~26SER                                                                      | 298            | -0.982               | -0.982           | -0.274               | -0.708               |  |
| P~27THR                                                                      | 299            | -0.303               | -0.303           | -0.054               | -0.25                |  |



|         |     |         |         |        |         |
|---------|-----|---------|---------|--------|---------|
| P~28ASN | 300 | -0.173  | -0.173  | -0.209 | 0.036   |
| P~29TRP | 301 | -8.749  | -8.749  | -4.633 | -4.116  |
| P~30SER | 302 | -0.18   | -0.18   | -0.047 | -0.134  |
| P~31ALA | 303 | -0.069  | -0.069  | -0.017 | -0.052  |
| P~32GLU | 304 | 0.023   | 0.023   | -0.012 | 0.035   |
| P~33ARG | 305 | -0.353  | -0.353  | -0.054 | -0.299  |
| P~34SER | 306 | 0.02    | 0.02    | -0.012 | 0.033   |
| P~35ARG | 307 | 0.188   | 0.188   | -0.008 | 0.196   |
| P~36LEU | 308 | 0.031   | 0.031   | -0.004 | 0.035   |
| P~37ASN | 309 | 0.01    | 0.01    | -0.004 | 0.014   |
| P~38TYR | 310 | -0.06   | -0.06   | -0.016 | -0.044  |
| P~39PRO | 311 | -0.028  | -0.028  | -0.012 | -0.017  |
| P~40GLU | 312 | 0.448   | 0.448   | -0.041 | 0.489   |
| P~41ASN | 313 | -0.347  | -0.347  | -0.23  | -0.117  |
| P~42GLY | 314 | 0.016   | 0.016   | -0.066 | 0.083   |
| P~43TRP | 315 | -0.636  | -0.636  | -0.248 | -0.389  |
| P~44THR | 316 | -3.656  | -3.656  | -3.354 | -0.301  |
| P~45PRO | 317 | -7.554  | -7.554  | 1.018  | -8.572  |
| P~46GLY | 318 | -2.875  | -2.875  | -2.484 | -0.391  |
| P~47GLU | 319 | -6.382  | -6.382  | -3.703 | -2.679  |
| P~48ASP | 320 | -25.796 | -25.796 | -5.801 | -19.995 |
| P~49SER | 321 | -0.567  | -0.567  | -0.366 | -0.201  |
| P~50TYR | 322 | 0.156   | 0.156   | -0.077 | 0.233   |
| P~51ARG | 323 | 1.052   | 1.052   | -0.098 | 1.149   |
| P~52GLU | 324 | -1.804  | -1.804  | -0.18  | -1.623  |
| P~53TRP | 325 | -0.084  | -0.084  | -0.036 | -0.049  |
| P~54ILE | 326 | -0.047  | -0.047  | -0.023 | -0.024  |
| P~55GLN | 327 | -0.043  | -0.043  | -0.006 | -0.037  |
| P~56VAL | 328 | -0.019  | -0.019  | -0.003 | -0.016  |
| P~57ASP | 329 | -0.255  | -0.255  | -0.001 | -0.253  |
| P~58LEU | 330 | 0.009   | 0.009   | -0.001 | 0.01    |
| P~59GLY | 331 | 0.007   | 0.007   | 0      | 0.007   |
| P~60LEU | 332 | -0.012  | -0.012  | 0      | -0.012  |

|         |     |         |         |        |        |
|---------|-----|---------|---------|--------|--------|
| P~61LEU | 333 | 0.006   | 0.006   | 0      | 0.006  |
| P~62ARG | 334 | 0.194   | 0.194   | 0      | 0.195  |
| P~63PHE | 335 | 0       | 0       | 0      | 0      |
| P~64VAL | 336 | 0.011   | 0.011   | 0      | 0.012  |
| P~65THR | 337 | -0.011  | -0.011  | 0      | -0.011 |
| P~66ALA | 338 | 0.01    | 0.01    | -0.001 | 0.011  |
| P~67VAL | 339 | -0.002  | -0.002  | -0.002 | 0      |
| P~68GLY | 340 | -0.01   | -0.01   | -0.001 | -0.008 |
| P~69THR | 341 | 0.078   | 0.078   | -0.005 | 0.084  |
| P~70GLN | 342 | -0.079  | -0.079  | -0.013 | -0.066 |
| P~71GLY | 343 | 0.093   | 0.093   | -0.016 | 0.109  |
| P~72ALA | 344 | -0.122  | -0.122  | -0.076 | -0.046 |
| P~73ILE | 345 | -0.174  | -0.174  | -0.18  | 0.005  |
| P~74SER | 346 | -1.49   | -1.49   | -0.923 | -0.567 |
| P~75LYS | 347 | -1.244  | -1.244  | -0.311 | -0.934 |
| P~76GLU | 348 | -0.669  | -0.669  | -3.171 | 2.502  |
| P~77THR | 349 | -15.043 | -15.043 | -14.17 | -0.873 |
| P~78LYS | 350 | -2.967  | -2.967  | -2.719 | -0.248 |
| P~79LYS | 351 | -3.863  | -3.863  | -5.278 | 1.415  |
| P~80LYS | 352 | 0.149   | 0.149   | -0.293 | 0.442  |
| P~81TYR | 353 | -3.109  | -3.109  | -4.329 | 1.219  |
| P~82TYR | 354 | -0.115  | -0.115  | -0.063 | -0.052 |
| P~83VAL | 355 | 0.021   | 0.021   | -0.038 | 0.058  |
| P~84LYS | 356 | 1.13    | 1.13    | -0.022 | 1.152  |
| P~85THR | 357 | -0.085  | -0.085  | -0.009 | -0.076 |
| P~86TYR | 358 | 0.035   | 0.035   | -0.01  | 0.045  |
| P~87LYS | 359 | 0.716   | 0.716   | -0.006 | 0.722  |
| P~88ILE | 360 | -0.002  | -0.002  | -0.003 | 0.001  |
| P~89ASP | 361 | -0.72   | -0.72   | -0.002 | -0.718 |
| P~90VAL | 362 | -0.006  | -0.006  | -0.001 | -0.006 |
| P~91SER | 363 | 0.003   | 0.003   | -0.001 | 0.004  |
| P~92SER | 364 | 0.011   | 0.011   | 0      | 0.011  |
| P~93ASN | 365 | -0.008  | -0.008  | 0      | -0.007 |

|          |     |        |        |        |        |
|----------|-----|--------|--------|--------|--------|
| P~94GLY  | 366 | -0.006 | -0.006 | 0      | -0.005 |
| P~95GLU  | 367 | -0.227 | -0.227 | -0.001 | -0.226 |
| P~96ASP  | 368 | -0.26  | -0.26  | 0      | -0.26  |
| P~97TRP  | 369 | -0.009 | -0.009 | -0.002 | -0.006 |
| P~98ILE  | 370 | -0.013 | -0.013 | -0.001 | -0.012 |
| P~99THR  | 371 | 0.03   | 0.03   | -0.001 | 0.031  |
| P~100ILE | 372 | -0.016 | -0.016 | -0.001 | -0.015 |
| P~101LYS | 373 | 0.403  | 0.403  | -0.001 | 0.404  |
| P~102GLU | 374 | -0.448 | -0.448 | -0.001 | -0.448 |
| P~103GLY | 375 | -0.002 | -0.002 | 0      | -0.002 |
| P~104ASN | 376 | -0.001 | -0.001 | 0      | -0.001 |
| P~105LYS | 377 | 0.347  | 0.347  | 0      | 0.347  |
| P~106PRO | 378 | 0.02   | 0.02   | -0.001 | 0.02   |
| P~107VAL | 379 | -0.014 | -0.014 | -0.001 | -0.012 |
| P~108LEU | 380 | 0.036  | 0.036  | -0.004 | 0.04   |
| P~109PHE | 381 | -0.051 | -0.051 | -0.003 | -0.048 |
| P~110GLN | 382 | 0.021  | 0.021  | -0.003 | 0.024  |
| P~111GLY | 383 | 0.072  | 0.072  | -0.003 | 0.074  |
| P~112ASN | 384 | -0.067 | -0.067 | -0.008 | -0.059 |
| P~113THR | 385 | 0.017  | 0.017  | -0.006 | 0.023  |
| P~114ASN | 386 | -0.056 | -0.056 | -0.011 | -0.045 |
| P~115PRO | 387 | -0.032 | -0.032 | -0.027 | -0.005 |
| P~116THR | 388 | -0.03  | -0.03  | -0.01  | -0.021 |
| P~117ASP | 389 | -0.514 | -0.514 | -0.004 | -0.51  |
| P~118VAL | 390 | 0.015  | 0.015  | -0.003 | 0.018  |
| P~119VAL | 391 | -0.02  | -0.02  | -0.003 | -0.017 |
| P~120VAL | 392 | 0.009  | 0.009  | -0.001 | 0.011  |
| P~121ALA | 393 | 0.006  | 0.006  | -0.001 | 0.007  |
| P~122VAL | 394 | -0.023 | -0.023 | -0.001 | -0.022 |
| P~123PHE | 395 | 0.011  | 0.011  | -0.001 | 0.012  |
| P~124PRO | 396 | 0.014  | 0.014  | 0      | 0.015  |
| P~125LYS | 397 | 0.257  | 0.257  | 0      | 0.257  |
| P~126PRO | 398 | 0.002  | 0.002  | 0      | 0.002  |

|          |     |         |         |         |         |
|----------|-----|---------|---------|---------|---------|
| P~127LEU | 399 | -0.001  | -0.001  | 0       | -0.001  |
| P~128ILE | 400 | -0.007  | -0.007  | 0       | -0.006  |
| P~129THR | 401 | 0       | 0       | 0       | 0       |
| P~130ARG | 402 | 0.215   | 0.215   | -0.001  | 0.216   |
| P~131PHE | 403 | 0.001   | 0.001   | -0.001  | 0.002   |
| P~132VAL | 404 | 0.004   | 0.004   | -0.002  | 0.006   |
| P~133ARG | 405 | 0.66    | 0.66    | -0.006  | 0.666   |
| P~134ILE | 406 | -0.049  | -0.049  | -0.011  | -0.038  |
| P~135LYS | 407 | 1.257   | 1.257   | -0.022  | 1.279   |
| P~136PRO | 408 | -0.094  | -0.094  | -0.052  | -0.042  |
| P~137ALA | 409 | -0.084  | -0.084  | -0.018  | -0.066  |
| P~138THR | 410 | 0.04    | 0.04    | -0.029  | 0.069   |
| P~139TRP | 411 | -0.144  | -0.144  | -0.437  | 0.293   |
| P~140GLU | 412 | -1.756  | -1.756  | -0.126  | -1.63   |
| P~141THR | 413 | -0.789  | -0.789  | -0.905  | 0.116   |
| P~142GLY | 414 | -0.174  | -0.174  | -0.772  | 0.598   |
| P~143ILE | 415 | -1.382  | -1.382  | -1.058  | -0.324  |
| P~144SER | 416 | -0.102  | -0.102  | -0.259  | 0.157   |
| P~145MET | 417 | -0.165  | -0.165  | -0.05   | -0.115  |
| P~146ARG | 418 | 0.654   | 0.654   | -0.026  | 0.68    |
| P~147PHE | 419 | 0       | 0       | -0.008  | 0.009   |
| P~148GLU | 420 | -0.409  | -0.409  | -0.002  | -0.407  |
| P~149VAL | 421 | 0.006   | 0.006   | -0.001  | 0.007   |
| P~150TYR | 422 | -0.02   | -0.02   | -0.001  | -0.019  |
| P~151GLY | 423 | -0.001  | -0.001  | 0       | -0.001  |
| P~152CYS | 424 | -0.006  | -0.006  | 0       | -0.006  |
| P~153LYS | 425 | 0.161   | 0.161   | 0       | 0.162   |
| P~154ILE | 426 | 0.003   | 0.003   | 0       | 0.004   |
| P~155THR | 427 | -0.127  | -0.127  | 0       | -0.127  |
| Total    |     | -97.744 | -97.744 | -67.662 | -30.082 |

Note: P~, Protein; MMPBSA, molecular mechanics poisson boltzmann surface area; MM, molecular mechanics; VDW, van der Waals energies; COU, coulombic electrostatic interaction energy.
